# Supplementary material for: Epigenetic Plasticity Drives Carcinogenesis and Multi-Therapy Resistance in Multiple Myeloma
Source: Research Square preprint supplement (doi:10.21203/rs.3.rs-6306816/v1), 2025-04-15
Supplement: Supplementary file 1 [file 0121130d0581fce40015fe8a.xlsx]

## Sheet: Univariate_CoxPH
SMM - TTP						NDMM - PFS						NDMM - OS						ERMM - OS						LRMM - OS						Active MM - OS
Variable	beta	HR (95% CI for HR)	wald.test	p.value		Variable	beta	HR (95% CI for HR)	wald.test	p.value		Variable	beta	HR (95% CI for HR)	wald.test	p.value		Variable	beta	HR (95% CI for HR)	wald.test	p.value		Variable	beta	HR (95% CI for HR)	wald.test	p.value		Variable	beta	HR (95% CI for HR)	wald.test	p.value
NRAS	1.8	5.8 (1.9-18)	9.2	0.0025		amp_dup_1q21_	0.68	2 (1.3-3)	11	0.00095		amp_dup_1q21_	0.96	2.6 (1.6-4.4)	13	0.00027		ISS_I	-0.95	0.39 (0.27-0.56)	25	6.9e-07		Double_hit	0.81	2.2 (1.6-3.2)	19	1.1e-05		Double_hit	1	2.7 (2.1-3.4)	68	1.7e-16
BMPC > 20	1.4	4 (1.5-10)	8.2	0.0043		PC1>0	0.52	1.7 (1.2-2.5)	7.2	0.0071		ISS_I	-0.99	0.37 (0.21-0.65)	12	0.00047		t4_14_	1.1	3.1 (1.9-5)	22	2.5e-06		TP53	0.92	2.5 (1.6-4)	15	0.00011		ISS_I	-0.92	0.4 (0.31-0.51)	54	1.8e-13
Supercluster β	-1.3	0.27 (0.088-0.82)	5.3	0.021		Double_hit	0.7	2 (1.2-3.4)	7.1	0.0076		ISS_III	0.96	2.6 (1.5-4.6)	11	0.001		Double_hit	0.86	2.4 (1.6-3.4)	20	6.1e-06		Female (gender)	-0.58	0.56 (0.4-0.79)	11	0.00093		amp_dup_1q21_	0.76	2.1 (1.7-2.7)	46	1.3e-11
Mayo_Risk_2018_LR	-2.3	0.098 (0.013-0.74)	5	0.025		PIK3CA	1.3	3.8 (1.4-11)	6.8	0.009		Double_hit	0.95	2.6 (1.4-4.9)	8.4	0.0037		R_ISS_I	-1.2	0.31 (0.18-0.55)	17	3.9e-05		del_17p_	0.62	1.9 (1.3-2.7)	10	0.0014		PC1>0	0.71	2 (1.6-2.5)	40	2.5e-10
PC1>0	0.9	2.5 (0.94-6.4)	3.4	0.065		Age_at_biopsy_54_younger	-0.55	0.58 (0.35-0.95)	4.7	0.031		Age_at_biopsy_54_younger	-1.2	0.31 (0.13-0.71)	7.5	0.0062		PC1>0	0.66	1.9 (1.4-2.7)	15	0.00012		African American (race)	-0.87	0.42 (0.24-0.72)	9.9	0.0016		Supercluster α	0.73	2.1 (1.7-2.6)	39	4.4e-10
M_protein_serum_2gdl	0.89	2.4 (0.93-6.3)	3.3	0.069		Supercluster β	-0.51	0.6 (0.37-0.96)	4.5	0.034		t4_14_	1.1	3 (1.3-6.7)	7.2	0.0071		Supercluster α	0.68	2 (1.4-2.8)	14	0.00017		PTPN11	-2.2	0.11 (0.026-0.43)	9.8	0.0017		t4_14_	0.96	2.6 (1.9-3.6)	36	1.9e-09
Mayo_Risk_2018_HR	0.85	2.3 (0.92-6)	3.2	0.075		ZNF292	0.93	2.5 (0.93-6.9)	3.3	0.069		RPRD1B	1.7	5.5 (1.3-23)	5.4	0.021		PRDM1	1.4	4.1 (1.9-8.7)	13	0.00035		ISS_I	-0.6	0.55 (0.36-0.83)	8.2	0.0041		Triple_hit	1.1	3.1 (2.1-4.8)	29	8.1e-08
del_17p_	1.6	5.1 (0.59-44)	2.2	0.14		ISS_III	0.42	1.5 (0.95-2.4)	3.1	0.08		ZNF292	1.4	4 (1.2-13)	5.4	0.021		Supercluster β	-0.61	0.54 (0.39-0.76)	12	0.00043		Supercluster α	0.59	1.8 (1.2-2.7)	8	0.0046		R_ISS_I	-0.96	0.38 (0.27-0.55)	27	2e-07
HIST1H1E	1.1	3.1 (0.7-14)	2.2	0.14		African American (race)	-0.8	0.45 (0.18-1.1)	3	0.081		CREBBP	1.3	3.8 (1.2-12)	5	0.026		ISS_II	0.7	2 (1.3-3)	11	0.00075		SAMHD1	1	2.7 (1.3-5.6)	7.1	0.0076		ISS_III	0.66	1.9 (1.5-2.5)	24	8.1e-07
Mayo_Risk_2018_IR	0.54	1.7 (0.65-4.5)	1.2	0.27		DIS3	0.47	1.6 (0.94-2.7)	3	0.084		TRAF3	-1.6	0.2 (0.05-0.84)	4.9	0.027		del_13q_	0.58	1.8 (1.3-2.5)	11	0.00082		Triple_hit	0.75	2.1 (1.2-3.7)	6.9	0.0085		del_17p_	0.64	1.9 (1.5-2.5)	23	1.5e-06
Age_at_biopsy_54_younger	-0.62	0.54 (0.17-1.7)	1.2	0.28		RPRD1B	1	2.8 (0.87-8.8)	3	0.084		PC1>0	0.56	1.8 (1-3)	4.5	0.034		Age_at_biopsy_54_younger	-0.83	0.43 (0.25-0.74)	9.3	0.0023		PRDM1	-1.3	0.28 (0.1-0.76)	6.2	0.013		TP53	0.75	2.1 (1.5-2.9)	21	4.3e-06
PC2>0	-0.68	0.51 (0.15-1.8)	1.1	0.29		BTG1	0.99	2.7 (0.84-8.6)	2.8	0.095		Hispanic (ethnicity)	-2.1	0.12 (0.016-0.86)	4.4	0.035		ISS_III	0.64	1.9 (1.2-2.9)	8.9	0.0029		KRAS	0.49	1.6 (1.1-2.4)	6.1	0.014		R_ISS_III	0.71	2 (1.5-2.8)	19	1.6e-05
Age_at_biopsy_76_older	0.64	1.9 (0.51-7.1)	0.93	0.34		t14_16_	0.77	2.2 (0.87-5.3)	2.8	0.096		R_ISS_I	-0.81	0.44 (0.2-0.99)	4	0.046		R_ISS_III	0.75	2.1 (1.3-3.5)	8.6	0.0034		del_13q_	0.38	1.5 (1-2.1)	4.5	0.034		ISS_II	0.53	1.7 (1.3-2.2)	18	1.8e-05
t11_14_	-0.56	0.57 (0.16-2)	0.75	0.39		Age_at_biopsy_55_75	0.32	1.4 (0.93-2.1)	2.5	0.11		NFKB2	1.4	4.1 (0.98-17)	3.7	0.053		amp_dup_1q21_	0.46	1.6 (1.1-2.2)	7	0.008		R_ISS_III	0.56	1.8 (1-3)	4.4	0.035		del_13q_	0.47	1.6 (1.3-2)	18	2.6e-05
Double_hit	0.86	2.4 (0.27-21)	0.6	0.44		t11_14_	0.36	1.4 (0.92-2.2)	2.6	0.11		BRAF	-1.9	0.15 (0.021-1.1)	3.5	0.06		NF1	1	2.9 (1.3-6.5)	6.3	0.012		ISS_III	0.44	1.6 (1-2.4)	4	0.046		Age_at_biopsy_54_younger	-0.64	0.53 (0.38-0.72)	16	7.5e-05
IGLL5	-0.5	0.61 (0.14-2.7)	0.43	0.51		EP300	-1.6	0.21 (0.029-1.5)	2.4	0.12		R_ISS_III	0.69	2 (0.97-4.1)	3.5	0.061		KDM6A	1.3	3.6 (1.3-9.9)	6.2	0.013		Hispanic (ethnicity)	0.55	1.7 (1-3)	3.9	0.048		ARID1A	0.86	2.4 (1.5-3.6)	16	8e-05
DIS3	0.44	1.5 (0.35-6.9)	0.33	0.57		ISS_I	-0.27	0.76 (0.52-1.1)	1.9	0.17		Age_at_biopsy_76_older	0.57	1.8 (0.95-3.3)	3.3	0.07		Triple_hit	0.81	2.2 (1.2-4.3)	6	0.014		R_ISS_I	-0.61	0.54 (0.3-1)	3.9	0.049		RB1	0.95	2.6 (1.5-4.4)	12	0.00055
Age_at_biopsy_55_75	0.22	1.2 (0.48-3.2)	0.2	0.65		Supercluster α	0.27	1.3 (0.89-1.9)	1.9	0.17		Supercluster β	-0.63	0.53 (0.26-1.1)	3.1	0.08		ARID1A	1	2.7 (1.2-6.2)	5.7	0.017		NF1	0.97	2.6 (0.97-7.2)	3.6	0.057		CYLD	0.75	2.1 (1.4-3.3)	12	0.00066
Female (gender)	-0.18	0.83 (0.32-2.1)	0.15	0.7		del_1p_	0.5	1.6 (0.8-3.4)	1.8	0.18		TP53	0.72	2 (0.81-5.2)	2.3	0.13		R_ISS_II	0.49	1.6 (1.1-2.5)	5.4	0.02		t4_14_	0.45	1.6 (0.96-2.6)	3.3	0.069		TRAF3	-1.2	0.31 (0.15-0.63)	11	0.0011
Supercluster α	-0.16	0.85 (0.33-2.2)	0.11	0.74		NF1	-1.3	0.27 (0.037-1.9)	1.7	0.19		PIK3CA	0.88	2.4 (0.75-7.7)	2.2	0.14		POT1	1.7	5.3 (1.3-22)	5.4	0.02		RB1	0.58	1.8 (0.94-3.4)	3.1	0.079		Age_at_biopsy_55_75	0.38	1.5 (1.1-1.9)	9.2	0.0025
t4_14_	0.28	1.3 (0.17-10)	0.08	0.78		TP53	0.46	1.6 (0.77-3.2)	1.5	0.22		del_17p_	0.5	1.7 (0.81-3.4)	1.9	0.17		Age_at_biopsy_55_75	0.42	1.5 (1-2.2)	4.3	0.039		EP300	0.73	2.1 (0.84-5.1)	2.5	0.11		KDM6A	1.1	3 (1.3-6.7)	6.9	0.0084
African American (race)	-0.25	0.78 (0.1-5.9)	0.06	0.8		UBR5	0.51	1.7 (0.73-3.8)	1.5	0.23		Age_at_biopsy_55_75	0.36	1.4 (0.83-2.5)	1.7	0.19		DIS3	0.55	1.7 (1-3)	4	0.045		SP140	-0.61	0.54 (0.25-1.2)	2.4	0.12		POT1	0.85	2.3 (1.2-4.6)	6.3	0.012
KRAS	0.16	1.2 (0.33-4.1)	0.06	0.81		R_ISS_III	0.33	1.4 (0.76-2.6)	1.2	0.28		ISS_II	0.36	1.4 (0.83-2.5)	1.7	0.19		del_17p_	0.42	1.5 (0.99-2.3)	3.8	0.053		PC1>0	0.27	1.3 (0.9-1.9)	2	0.15		R_ISS_II	0.31	1.4 (1-1.8)	5.3	0.022
amp_dup_1q21_	-0.12	0.89 (0.25-3.1)	0.04	0.85		CYLD	0.63	1.9 (0.6-6)	1.2	0.28		SAMHD1	-1.1	0.32 (0.044-2.3)	1.3	0.26		SP140	0.67	1.9 (0.99-3.8)	3.7	0.054		HIST1H1E	0.56	1.8 (0.81-3.8)	2.1	0.15		Supercluster β	-0.25	0.78 (0.62-0.97)	4.8	0.029
del_13q_	-0.092	0.91 (0.33-2.5)	0.03	0.86		del_17p_	0.29	1.3 (0.78-2.3)	1.1	0.29		UBR5	-1.1	0.34 (0.048-2.5)	1.1	0.29		TP53	0.51	1.7 (0.99-2.8)	3.7	0.056		ARID1A	0.38	1.5 (0.85-2.5)	1.9	0.17		ATM	0.44	1.5 (1-2.3)	4.4	0.036
BRAF	0.11	1.1 (0.15-8.5)	0.01	0.91		NFKB2	0.73	2.1 (0.51-8.4)	1	0.31		ATM	-1	0.35 (0.049-2.5)	1.1	0.3		ZNF292	1.3	3.7 (0.92-15)	3.4	0.065		DTX1	0.81	2.2 (0.71-7.1)	1.9	0.17		ZNF292	0.57	1.8 (1-3.2)	3.8	0.051
FLCr_20	0.047	1 (0.41-2.6)	0.01	0.92		IGLL5	-0.28	0.75 (0.42-1.3)	0.92	0.34		BTG1	1.1	2.9 (0.39-22)	1.1	0.3		CCND1	0.67	1.9 (0.95-4)	3.3	0.068		del_1p_	-0.78	0.46 (0.15-1.4)	1.8	0.18		MAFB	1.1	2.9 (0.92-9)	3.3	0.069
KMT2C	-0.11	0.9 (0.12-6.8)	0.01	0.92		IRF4	0.49	1.6 (0.6-4.5)	0.92	0.34		DIS3	0.37	1.4 (0.71-2.9)	1	0.31		ATM	0.61	1.8 (0.93-3.6)	3.1	0.079		ISS_II	0.25	1.3 (0.89-1.9)	1.8	0.18		PC2>0	0.2	1.2 (0.98-1.5)	3.3	0.07
t14_16_	-16	0.0000001 (0-Inf)	0	1		TRAF3	-0.29	0.75 (0.41-1.4)	0.87	0.35		t14_16_	0.59	1.8 (0.56-5.8)	0.98	0.32		del_1p_	0.69	2 (0.87-4.5)	2.7	0.1		ATM	0.35	1.4 (0.83-2.4)	1.6	0.2		NF1	0.53	1.7 (0.93-3.1)	3	0.084
LTB	-17	0.000000038 (0-Inf)	0	1		MAF	0.66	1.9 (0.47-7.9)	0.85	0.36		HIST1H1E	-1	0.36 (0.05-2.6)	1	0.32		ABCF1	1.2	3.2 (0.78-13)	2.6	0.11		IGLL5	-0.42	0.65 (0.34-1.2)	1.7	0.2		PIK3CA	0.61	1.8 (0.91-3.7)	2.9	0.087
						SETD2	-0.64	0.53 (0.13-2.1)	0.79	0.37		del_13q_	0.26	1.3 (0.77-2.2)	0.96	0.33		ARID2	1.1	3.1 (0.76-13)	2.5	0.12		PIM1	0.76	2.1 (0.67-6.7)	1.6	0.2		PTPN11	-0.77	0.46 (0.19-1.1)	2.9	0.087
						CREBBP	0.51	1.7 (0.53-5.3)	0.76	0.38		RPL10	-0.99	0.37 (0.051-2.7)	0.96	0.33		CDKN1B	0.71	2 (0.83-5)	2.4	0.12		CYLD	0.31	1.4 (0.81-2.3)	1.4	0.24		MAML2	0.43	1.5 (0.93-2.5)	2.8	0.095
						EGR1	-0.82	0.44 (0.061-3.2)	0.67	0.41		CYLD	0.67	2 (0.48-8)	0.87	0.35		EP300	0.57	1.8 (0.78-4)	1.8	0.18		RPL5	-1.2	0.3 (0.042-2.2)	1.4	0.24		FGFR3	0.5	1.7 (0.91-3)	2.7	0.1
						PC2>0	-0.18	0.83 (0.54-1.3)	0.65	0.42		Supercluster α	0.25	1.3 (0.76-2.2)	0.89	0.35		FGFR3	0.52	1.7 (0.78-3.6)	1.8	0.18		TET2	-0.53	0.59 (0.24-1.4)	1.4	0.25		NFKBIA	0.56	1.7 (0.9-3.4)	2.7	0.1
						CCND1	-0.8	0.45 (0.062-3.2)	0.63	0.43		RB1	0.93	2.5 (0.34-19)	0.84	0.36		BTG1	-1.3	0.28 (0.039-2)	1.6	0.21		CREBBP	-1.1	0.34 (0.048-2.5)	1.1	0.29		IGLL5	-0.31	0.73 (0.5-1.1)	2.6	0.11
						ATM	-0.37	0.69 (0.25-1.9)	0.52	0.47		TCL1A	0.6	1.8 (0.44-7.5)	0.7	0.4		TET2	-0.63	0.53 (0.2-1.4)	1.6	0.21		PRKD2	0.33	1.4 (0.73-2.7)	1	0.31		PRKD2	0.39	1.5 (0.92-2.4)	2.6	0.11
						NCOR1	-0.52	0.6 (0.15-2.4)	0.52	0.47		African American (race)	-0.47	0.62 (0.19-2)	0.63	0.43		NCOR1	0.51	1.7 (0.68-4.1)	1.2	0.26		ZNF292	-0.4	0.67 (0.31-1.4)	1	0.31		BCL7A	0.56	1.8 (0.83-3.7)	2.2	0.14
						TRAF2	-0.72	0.49 (0.068-3.5)	0.51	0.47		SETD2	-0.79	0.45 (0.063-3.3)	0.62	0.43		Age_at_biopsy_76_older	0.29	1.3 (0.8-2.2)	1.2	0.27		amp_dup_1q21_	0.19	1.2 (0.83-1.7)	0.98	0.32		CCND1	0.41	1.5 (0.87-2.6)	2.1	0.15
						Female (gender)	-0.14	0.87 (0.59-1.3)	0.47	0.49		EP300	-0.78	0.46 (0.063-3.3)	0.6	0.44		RB1	0.62	1.9 (0.59-5.9)	1.1	0.29		KMT2C	0.28	1.3 (0.76-2.3)	0.96	0.33		NCOR1	0.37	1.4 (0.86-2.4)	1.9	0.16
						HIST1H1E	-0.37	0.69 (0.22-2.2)	0.41	0.52		LTB	0.54	1.7 (0.42-7)	0.55	0.46		TRAF3	-0.61	0.54 (0.17-1.7)	1.1	0.3		SETD2	-0.67	0.51 (0.13-2.1)	0.89	0.35		TET2	-0.45	0.64 (0.34-1.2)	2	0.16
						MAN2C1	-0.63	0.53 (0.074-3.8)	0.39	0.53		NRAS	-0.29	0.74 (0.34-1.6)	0.53	0.47		EGR1	0.45	1.6 (0.64-3.8)	0.98	0.32		HUWE1	0.42	1.5 (0.62-3.7)	0.84	0.36		BTG1	-0.9	0.4 (0.1-1.6)	1.6	0.2
						TCL1A	0.36	1.4 (0.46-4.5)	0.39	0.53		R_ISS_II	0.21	1.2 (0.68-2.2)	0.49	0.48		MAML2	0.39	1.5 (0.69-3.2)	1	0.32		IDH1	0.38	1.5 (0.64-3.3)	0.8	0.37		DIS3	0.22	1.2 (0.89-1.7)	1.6	0.2
						NRAS	0.16	1.2 (0.7-2)	0.36	0.55		ARID1A	0.44	1.6 (0.38-6.4)	0.37	0.54		Hispanic (ethnicity)	-0.41	0.66 (0.29-1.5)	0.97	0.33		MAML2	0.32	1.4 (0.68-2.8)	0.78	0.38		BRAF	-0.25	0.78 (0.51-1.2)	1.4	0.24
						PRDM1	-0.41	0.66 (0.16-2.7)	0.33	0.56		PRDM1	0.44	1.6 (0.38-6.4)	0.38	0.54		KDM5C	0.65	1.9 (0.48-7.8)	0.84	0.36		PIK3CA	0.48	1.6 (0.52-5.1)	0.68	0.41		Hispanic (ethnicity)	-0.26	0.77 (0.5-1.2)	1.3	0.25
						del_13q_	0.11	1.1 (0.76-1.6)	0.33	0.57		HIST1H1D	0.4	1.5 (0.36-6.1)	0.3	0.58		BCL7A	0.45	1.6 (0.5-4.9)	0.59	0.44		SF3B1	0.37	1.5 (0.59-3.6)	0.67	0.41		IDH1	0.44	1.6 (0.74-3.3)	1.4	0.25
						R_ISS_I	-0.13	0.88 (0.55-1.4)	0.31	0.58		IGLL5	-0.22	0.8 (0.36-1.8)	0.3	0.58		XBP1	0.44	1.6 (0.49-4.9)	0.57	0.45		DIS3	-0.23	0.8 (0.46-1.4)	0.64	0.42		BHLHE41	-1.1	0.33 (0.047-2.4)	1.2	0.27
						SP140	-0.32	0.73 (0.23-2.3)	0.3	0.58		KLHL6	0.4	1.5 (0.36-6.1)	0.3	0.58		RASA2	0.35	1.4 (0.53-3.8)	0.48	0.49		t11_14_	0.17	1.2 (0.77-1.8)	0.6	0.44		African American (race)	-0.2	0.82 (0.57-1.2)	1.1	0.29
						t4_14_	0.21	1.2 (0.57-2.6)	0.28	0.6		TET2	-0.53	0.59 (0.081-4.3)	0.27	0.6		KRAS	-0.15	0.86 (0.56-1.3)	0.44	0.51		ARID2	-0.42	0.66 (0.21-2.1)	0.51	0.48		CDKN1B	0.47	1.6 (0.66-3.9)	1.1	0.29
						HIST1H1D	-0.37	0.69 (0.17-2.8)	0.27	0.6		NCOR1	-0.52	0.6 (0.082-4.3)	0.26	0.61		PTPN11	0.47	1.6 (0.39-6.5)	0.43	0.51		BRAF	-0.21	0.81 (0.45-1.5)	0.46	0.5		Female (gender)	-0.11	0.89 (0.72-1.1)	1	0.31
						Age_at_biopsy_76_older	0.13	1.1 (0.69-1.9)	0.25	0.62		KMT2B	-0.36	0.7 (0.17-2.9)	0.25	0.62		CREBBP	0.45	1.6 (0.39-6.4)	0.41	0.52		MAN2C1	0.33	1.4 (0.44-4.4)	0.31	0.58		ABCF1	0.57	1.8 (0.57-5.5)	0.97	0.33
						RB1	0.32	1.4 (0.34-5.6)	0.2	0.66		PC2>0	-0.15	0.86 (0.45-1.6)	0.21	0.64		CYLD	0.32	1.4 (0.51-3.7)	0.41	0.52		NFKB2	0.33	1.4 (0.44-4.4)	0.31	0.58		HIST1H2BK	-0.92	0.4 (0.056-2.8)	0.85	0.36
						PTPN11	0.3	1.4 (0.33-5.5)	0.18	0.67		NF1	-0.45	0.64 (0.088-4.6)	0.2	0.66		NRAS	-0.15	0.86 (0.55-1.4)	0.42	0.52		PC2>0	0.092	1.1 (0.78-1.5)	0.29	0.59		NFKB2	0.38	1.5 (0.65-3.3)	0.83	0.36
						IDH1	-0.29	0.75 (0.18-3)	0.17	0.68		DTX1	-0.38	0.68 (0.094-4.9)	0.14	0.71		t14_16_	0.27	1.3 (0.57-3)	0.4	0.53		RASA2	-0.28	0.76 (0.28-2.1)	0.3	0.59		RPL10	-0.34	0.71 (0.34-1.5)	0.79	0.37
						Hispanic (ethnicity)	-0.13	0.88 (0.46-1.7)	0.15	0.7		EGR1	-0.37	0.69 (0.095-5)	0.13	0.71		LTB	0.24	1.3 (0.59-2.7)	0.38	0.54		KMT2B	-0.18	0.84 (0.43-1.6)	0.26	0.61		SP140	0.22	1.2 (0.77-2)	0.81	0.37
						KMT2C	-0.15	0.86 (0.4-1.9)	0.15	0.7		Female (gender)	-0.089	0.91 (0.53-1.6)	0.11	0.74		PRKD2	0.28	1.3 (0.54-3.2)	0.38	0.54		NRAS	0.095	1.1 (0.74-1.6)	0.23	0.63		XBP1	0.4	1.5 (0.62-3.6)	0.79	0.37
						PRKD2	0.17	1.2 (0.48-2.9)	0.14	0.7		KRAS	-0.093	0.91 (0.49-1.7)	0.09	0.77		NFKB2	-0.6	0.55 (0.077-3.9)	0.36	0.55		TRAF2	-0.22	0.81 (0.3-2.2)	0.18	0.67		RASA2	0.31	1.4 (0.67-2.7)	0.73	0.39
						SF3B1	-0.27	0.76 (0.19-3.1)	0.14	0.71		MAML2	-0.24	0.79 (0.11-5.7)	0.06	0.81		KLHL6	-0.41	0.66 (0.16-2.7)	0.34	0.56		NFKBIA	0.16	1.2 (0.55-2.5)	0.16	0.69		t14_16_	0.24	1.3 (0.71-2.3)	0.66	0.42
						KRAS	-0.083	0.92 (0.59-1.4)	0.13	0.72		PRKD2	0.15	1.2 (0.36-3.7)	0.06	0.81		IRF4	-0.25	0.78 (0.29-2.1)	0.24	0.63		FGFR3	-0.22	0.8 (0.26-2.5)	0.14	0.71		RPRD1B	0.41	1.5 (0.56-4)	0.65	0.42
						RPL10	-0.21	0.81 (0.26-2.6)	0.13	0.72		KMT2C	-0.12	0.89 (0.32-2.4)	0.05	0.82		PC2>0	0.079	1.1 (0.78-1.5)	0.22	0.64		Supercluster β	0.051	1.1 (0.75-1.5)	0.08	0.77		EP300	0.23	1.3 (0.71-2.2)	0.62	0.43
						DTX1	-0.23	0.8 (0.2-3.2)	0.1	0.75		MAN2C1	0.19	1.2 (0.17-8.8)	0.04	0.85		SETD2	0.21	1.2 (0.51-3)	0.21	0.64		R_ISS_II	0.059	1.1 (0.69-1.6)	0.07	0.79		HIST1H1B	-0.8	0.45 (0.063-3.2)	0.63	0.43
						ARID2	0.2	1.2 (0.3-4.9)	0.07	0.78		TRAF2	0.17	1.2 (0.16-8.7)	0.03	0.86		HUWE1	-0.26	0.77 (0.25-2.4)	0.19	0.66		BCL7A	0.15	1.2 (0.37-3.6)	0.06	0.8		PRDM1	0.23	1.3 (0.72-2.2)	0.63	0.43
						SAMHD1	-0.11	0.89 (0.33-2.4)	0.05	0.82		SP140	0.1	1.1 (0.27-4.6)	0.02	0.89		UBR5	-0.16	0.85 (0.4-1.8)	0.17	0.68		UBR5	-0.07	0.93 (0.52-1.7)	0.05	0.82		SAMHD1	0.24	1.3 (0.7-2.3)	0.61	0.44
						PIM1	-0.16	0.86 (0.21-3.5)	0.05	0.83		IDH1	-0.1	0.9 (0.12-6.5)	0.01	0.92		Female (gender)	-0.067	0.93 (0.67-1.3)	0.16	0.69		CCND1	0.1	1.1 (0.41-3)	0.04	0.84		Age_at_biopsy_76_older	0.13	1.1 (0.82-1.6)	0.57	0.45
						BRAF	-0.07	0.93 (0.45-1.9)	0.04	0.85		IRF4	-0.11	0.9 (0.12-6.6)	0.01	0.92		IGLL5	-0.1	0.9 (0.51-1.6)	0.12	0.73		KLHL6	-0.1	0.9 (0.33-2.4)	0.04	0.84		HUWE1	0.26	1.3 (0.64-2.6)	0.54	0.46
						KMT2B	-0.091	0.91 (0.34-2.5)	0.03	0.86		del_1p_	0.015	1 (0.32-3.3)	0	0.98		ATRX	0.22	1.2 (0.31-5.1)	0.1	0.76		IRF4	0.05	1.1 (0.51-2.1)	0.02	0.89		SETD2	-0.26	0.77 (0.38-1.6)	0.53	0.47
						R_ISS_II	-0.03	0.97 (0.64-1.5)	0.02	0.89		CCND1	0.021	1 (0.14-7.4)	0	0.98		RPL10	0.14	1.2 (0.43-3.1)	0.08	0.78		POT1	0.047	1 (0.49-2.2)	0.01	0.9		ATRX	-0.43	0.65 (0.16-2.6)	0.37	0.54
						TET2	-0.079	0.92 (0.29-2.9)	0.02	0.89		PIM1	-0.024	0.98 (0.14-7.1)	0	0.98		t11_14_	0.062	1.1 (0.68-1.7)	0.07	0.79		t14_16_	0.068	1.1 (0.34-3.4)	0.01	0.91		CREBBP	0.26	1.3 (0.58-2.9)	0.38	0.54
						ISS_II	0.028	1 (0.68-1.6)	0.02	0.9		t11_14_	-0.0037	1 (0.54-1.8)	0	0.99		SAMHD1	0.17	1.2 (0.29-4.8)	0.06	0.81		TRAF3	0.063	1.1 (0.34-3.3)	0.01	0.91		MAF	-0.53	0.59 (0.083-4.2)	0.28	0.6
						KLHL6	0.061	1.1 (0.39-2.9)	0.01	0.91		ARID2	-16	0.00000011 (0-Inf)	0	1		ACTG1	-0.13	0.88 (0.22-3.6)	0.03	0.86		Age_at_biopsy_54_younger	-0.006	0.99 (0.63-1.6)	0	0.98		PIM1	0.27	1.3 (0.49-3.5)	0.28	0.6
						LTB	-0.053	0.95 (0.23-3.8)	0.01	0.94		MAF	-16	0.00000011 (0-Inf)	0	1		DUSP2	-0.16	0.85 (0.12-6.1)	0.02	0.87		Age_at_biopsy_55_75	0.0025	1 (0.68-1.5)	0	0.99		SF3B1	0.2	1.2 (0.54-2.7)	0.23	0.63
						MAML2	-0.0093	0.99 (0.24-4)	0	0.99		PTPN11	0.0055	1 (0.14-7.3)	0	1		HIST1H1E	-0.051	0.95 (0.39-2.3)	0.01	0.91		Age_at_biopsy_76_older	0.005	1 (0.54-1.9)	0	0.99		RPL5	-0.28	0.76 (0.24-2.4)	0.23	0.64
						ARID1A	0.0033	1 (0.25-4.1)	0	1		SF3B1	-16	0.00000011 (0-Inf)	0	1		HIST1H2BK	-0.11	0.9 (0.13-6.4)	0.01	0.91		TGDS	-17	3.9e-08 (0-Inf)	0	0.99		NRAS	0.064	1.1 (0.81-1.4)	0.21	0.65
																		BRAF	-0.016	0.98 (0.53-1.8)	0	0.96		NCOR1	0.00096	1 (0.51-2)	0	1		FUBP1	-0.32	0.73 (0.18-2.9)	0.2	0.66
																		KMT2B	-0.019	0.98 (0.5-1.9)	0	0.96								KMT2C	0.079	1.1 (0.76-1.5)	0.2	0.66
																		DNMT3A	-0.019	0.98 (0.31-3.1)	0	0.97								LTB	0.12	1.1 (0.6-2.1)	0.15	0.7
																		DTX1	-0.027	0.97 (0.24-3.9)	0	0.97								t11_14_	0.05	1.1 (0.8-1.4)	0.13	0.72
																		TRAF2	-0.028	0.97 (0.24-3.9)	0	0.97								IRF4	0.097	1.1 (0.63-1.9)	0.12	0.73
																		African American (race)	0.0061	1 (0.58-1.7)	0	0.98								KRAS	0.035	1 (0.8-1.3)	0.07	0.79
																		BHLHE41	-16	1.1e-07 (0-Inf)	0	0.99								MAN2C1	-0.13	0.87 (0.33-2.3)	0.07	0.79
																		CDKN2C	-16	1.1e-07 (0-Inf)	0	0.99								IDH2	-0.17	0.84 (0.21-3.4)	0.06	0.81
																		KMT2C	-0.0018	1 (0.6-1.7)	0	0.99								DUSP2	0.16	1.2 (0.29-4.7)	0.05	0.82
																		RFTN1	-16	1.1e-07 (0-Inf)	0	0.99								DNMT3A	0.094	1.1 (0.45-2.7)	0.04	0.83
																		HIST1H1D	-8.7e-05	1 (0.25-4)	0	1								TRAF2	0.075	1.1 (0.51-2.3)	0.04	0.84
																														EGR1	0.067	1.1 (0.51-2.3)	0.03	0.86
																														TCL1A	-0.12	0.89 (0.22-3.6)	0.03	0.87
																														del_1p_	-0.045	0.96 (0.54-1.7)	0.02	0.88
																														ACTG1	-0.074	0.93 (0.35-2.5)	0.02	0.88
																														HIST1H1E	0.018	1 (0.58-1.8)	0	0.95
																														KDM5C	-0.044	0.96 (0.24-3.8)	0	0.95
																														KLHL6	-0.022	0.98 (0.49-2)	0	0.95
																														ARID2	0.024	1 (0.42-2.5)	0	0.96
																														UBR5	0.011	1 (0.64-1.6)	0	0.96
																														DTX1	0.017	1 (0.45-2.3)	0	0.97
																														HIST1H1D	0.011	1 (0.42-2.4)	0	0.98
																														CDKN2C	-15	0.0000003 (0-Inf)	0	0.99
																														RFTN1	-15	0.0000003 (0-Inf)	0	0.99
																														TGDS	-16	0.00000011 (0-Inf)	0	0.99
																														KMT2B	0.00075	1 (0.64-1.6)	0	1

## Sheet: Multivariate_CoxPH
SMM - TTP											NDMM - PFS											NDMM - OS											ERMM - OS												LRMM - OS
n= 57, number of events= 18											n= 200, number of events= 107											n= 200, number of events= 57											n= 280, number of events= 134												n= 155, number of events= 117
											(7 observations deleted due to missingness)											(7 observations deleted due to missingness)											(23 observations deleted due to missingness)												(27 observations deleted due to missingness)
Variable	coef	exp(coef)	se(coef)	z	Pr(>|z|)	Signif.	exp(-coef)	lower .95	upper .95		Variable	coef	exp(coef)	se(coef)	z	Pr(>|z|)	Signif.	exp(-coef)	lower .95	upper .95		Variable	coef	exp(coef)	se(coef)	z	Pr(>|z|)	Signif.	exp(-coef)	lower .95	upper .95		Variable	coef	exp(coef)	se(coef)	z	Pr(>|z|)	Signif.	exp(coef)	exp(-coef)	lower .95	upper .95		Variable	coef	exp(coef)	se(coef)	z
NRAS (n=5)	2.0064	7.4367	0.6175	3.249	0.00116	**	0.1345	2.217	24.95		PIK3CA (n=4)	1.6285	5.0961	0.5251	3.101	0.00193	**	0.1962	1.8208	14.263		ZNF292 (n=4)	2.131	8.423	0.6263	3.402	0.000668	***	0.1187	2.46811	28.7484		t4_14 (n=26)	1.0763	2.9338	0.287	3.751	0.000176	***	2.9338	0.3408	1.6717	5.1488		SAMHD1 (n=8)	1.1459	3.1454	0.4462	2.568
BMPC>20 (n=22)	1.5265	4.6021	0.5037	3.031	0.00244	**	0.2173	1.715	12.35		amp_dup_1q21_ (n=52)	0.5518	1.7363	0.2191	2.518	0.01179	*	0.5759	1.1301	2.668		amp_dup_1q21_ (n=52)	0.8206	2.272	0.2922	2.808	0.004984	**	0.4402	1.28124	4.0282		PRDM1 (n=8)	1.4948	4.4583	0.4503	3.319	0.000903	***	4.4583	0.2243	1.8443	10.7773		Female (n=85)	-0.4893	0.6131	0.2079	-2.354
											PC1>0	0.3797	1.4619	0.2034	1.866	0.06198	.	0.6841	0.9812	2.178		t4_14_ (n=13)	1.336	3.804	0.4835	2.763	0.005724	**	0.2629	1.47454	9.8119		PC1>0 (n=148)	0.564	1.7578	0.1966	2.87	0.004111	**	1.7578	0.5689	1.1958	2.5839		del_17p (n=40)	0.5647	1.759	0.2573	2.195
Signif. codes: 0 ‘***’ 0.001 ‘**’ 0.01 ‘*’ 0.05 ‘.’ 0.1 ‘ ’ 1											Age_at_biopsy_54_younger	-0.4179	0.6584	0.2611	-1.6	0.10953		1.5187	0.3947	1.098		CREBBP (n=5)	1.526	4.598	0.6155	2.479	0.013188	*	0.2175	1.37613	15.3656		Age_at_biopsy_54_younger (n=54)	-0.9706	0.3789	0.3726	-2.605	0.009189	**	0.3789	2.6394	0.1825	0.7864		TP53 (n=23)	0.6257	1.8696	0.3014	2.076
																						TRAF3 (n=27)	-1.548	0.2126	0.7275	-2.128	0.033327	*	4.703	0.05109	0.8849		ARID1A (n=7)	0.9615	2.6156	0.4289	2.242	0.02497	*	2.6156	0.3823	1.1285	6.0624		PTPN11 (n=9)	-1.5158	0.2196	0.7383	-2.053
Concordance = 0.744 (se = 0.056)											Signif. codes: 0 ‘***’ 0.001 ‘**’ 0.01 ‘*’ 0.05 ‘.’ 0.1 ‘ ’ 1											Age_at_biopsy_54_younger (n=43)	-1.094	0.3347	0.5452	-2.007	0.044718	*	2.987	0.11497	0.9745		NF1 (n=8)	0.9358	2.5492	0.4351	2.151	0.031509	*	2.5492	0.3923	1.0865	5.9812		African American (race)	-0.5501	0.5769	0.2829	-1.945
Likelihood ratio test = 16.14 on 2 df, p=3e-04																						Hispanic_ethnicity	-1.897	0.15	1.021	-1.857	0.063273	.	6.666	0.02026	1.1106		POT1 (n=3)	1.6602	5.2603	0.796	2.086	0.036999	*	5.2603	0.1901	1.1053	25.0337		Hispanic (ethnicity)	0.6795	1.9728	0.6271	1.083
Wald test = 16.65 on 2 df, p=2e-4											Concordance = 0.621 (se = 0.028)											PC1>0	0.4611	1.586	0.2904	1.588	0.112287		0.6306	0.89762	2.8019		DIS3	-0.4948	0.6097	0.3449	-1.435	0.151425		0.6097	1.6402	0.3101	1.1987		PRDM1	-0.6038	0.5467	0.6453	-0.936
Score (log rank) test = 21.93 on 2 df, p=2e-05											Likelihood ratio test = 22.49 on 4 df, p=2e-04											RPRD1B	-13.1	2.038e-06	3426	-0.004	0.996948		490700	0	Inf		KDM6A	0.7899	2.2032	0.5513	1.433	0.151906		2.2032	0.4539	0.7478	6.4908		del_13q_	0.1212	1.1289	0.2307	0.525
											Wald test = 24.72 on 4 df, p=6e-05																						del_13q_	0.2843	1.3288	0.1984	1.433	0.151975		1.3288	0.7525	0.9006	1.9606		KRAS	0.1071	1.113	0.2291	0.467
											Score (logrank) test = 26.71 on 4 df, p=2e-05											Signif. codes: 0 ‘***’ 0.001 ‘**’ 0.01 ‘*’ 0.05 ‘.’ 0.1 ‘ ’ 1											Age_at_biopsy_55_75	-0.256	0.7742	0.2778	-0.921	0.356822		0.7742	1.2917	0.4491	1.3344
																																	amp_dup_1q21_	-0.1155	0.891	0.2106	-0.548	0.583606		0.891	1.1224	0.5896	1.3463		Signif. codes: 0 ‘***’ 0.001 ‘**’ 0.01 ‘*’ 0.05 ‘.’ 0.1 ‘ ’ 1
																						Concordance = 0.725 (se = 0.033)
																						Likelihood ratio test = 54.01 on 9 df, p=2e-08											Signif. codes: 0 ‘***’ 0.001 ‘**’ 0.01 ‘*’ 0.05 ‘.’ 0.1 ‘ ’ 1												Concordance = 0.659 (se = 0.026)
																						Wald test = 45.64 on 9 df, p=7e-07																							Likelihood ratio test = 54.75 on 10 df, p=4e-08
																						Score (logrank) test = 54.42 on 9 df, p=2e-08											Concordance = 0.686 (se = 0.025)												Wald test = 43.82 on 10 df, p=4e-06
																																	Likelihood ratio test = 62.79 on 12 df, p=7e-09												Score (logrank) test = 51.02 on 10 df, p=2e-07
																																	Wald test = 72.48 on 12 df, p=1e-10
																																	Score (logrank) test = 83.16 on 12 df, p=1e-12
[truncated: 16 more columns]
