# Supplementary material for: Epigenetic Plasticity Drives Carcinogenesis and Multi-Therapy Resistance in Multiple Myeloma
Source: Research Square preprint supplement (doi:10.21203/rs.3.rs-6306816/v1), 2025-04-15
Supplement: Supplementary file 2 [file 152ce45eb5b9544ed9ece1ca.xlsx]

## Sheet: Sheet1
Cytogenetic abnormality	Sample	Detected by
		FISH	inferCNV (scRNA-Seq data)	epiAneufinder (scATAC-Seq data)
Amp(1q21)	SMM_3	yes	yes	yes
Del(13q)	NDMM_2	yes	yes	yes
Del(17p)	NDMM_2	yes	yes	yes
Del(13q)	SMM_3	yes	no	yes
Gain(11q)	SMM_1	yes	yes	no
Del(14q)	SMM_2	yes	yes	no
Del(14q)	SMM_3	yes	yes	no
Gain(6p)	MGUS_2	not tested	no	yes
Gain(6p)	MGUS_3	not tested	no	yes
Gain(3q)	SMM_2	not tested	yes	yes
Gain(19p)	SMM_3	not tested	yes	yes
