# Supplementary material for: Epigenetic Plasticity Drives Carcinogenesis and Multi-Therapy Resistance in Multiple Myeloma
Source: Research Square preprint supplement (doi:10.21203/rs.3.rs-6306816/v1), 2025-04-15
Supplement: Supplementary file 3 [file 1a1d78977018c43b2a128e50.xlsx]

## Sheet: CRISPR_MMvsNonMM
Table S18. Differential essentially of genes subjected to CRISPR knockout in MM cell lines (n=20) compared to other cancer cell lines (n=1,075); data from DepMap Portal.
Gene	Dependency in MM cell lines	Dependency in other cancer cell lines	Differencial dependency (Other cancer cell lines - MM cell lines)
IRF4	-1.95455	-0.114906	1.83964
CCND2	-1.18974	-0.0905059	1.09923
POU2AF1	-1.13417	-0.0637211	1.07045
CBFB	-1.05591	-0.155353	0.900561
MEF2C	-0.86492	0.0200183	0.884938
PIM2	-0.97439	-0.110183	0.864208
EP300	-1.12422	-0.268591	0.855628
FURIN	-0.993184	-0.20142	0.791764
MYC	-2.56271	-1.78019	0.782522
PRDM1	-0.864323	-0.0854201	0.778902
ZNF217	-1.13794	-0.360332	0.777611
SMAD7	-0.864455	-0.097166	0.767289
DNAJC9	-1.99292	-1.23991	0.75301
ATP1B3	-1.01426	-0.273574	0.740681
WDR82	-2.33528	-1.61017	0.725113
YRDC	-2.5772	-1.87008	0.707125
MANF	-1.03791	-0.352974	0.684936
TCF3	-0.693509	-0.0201037	0.673406
NMNAT1	-0.942372	-0.284827	0.657545
MED23	-0.782614	-0.142693	0.639921
MED1	-1.32836	-0.69757	0.630785
NAMPT	-1.14302	-0.523882	0.619138
NFKB1	-0.63126	-0.0253284	0.605932
MCL1	-1.35696	-0.751692	0.605267
ZMYND8	-0.886968	-0.294149	0.592819
MAF	-0.744213	-0.154826	0.589387
CDAN1	-1.39161	-0.809199	0.582416
TAF5L	-0.819034	-0.238921	0.580113
PDCD2	-1.72593	-1.15102	0.574902
ALG12	-0.668944	-0.0967688	0.572175
MED19	-0.998931	-0.438916	0.560016
MBNL1	-0.732218	-0.187922	0.544296
MEN1	-0.842574	-0.300089	0.542485
ADSL	-1.42593	-0.88706	0.538869
IRS1	-0.644426	-0.106956	0.53747
NELFB	-1.6836	-1.14632	0.537281
ATP2C1	-0.655106	-0.118604	0.536502
SYVN1	-1.09612	-0.565762	0.530362
CDK6	-1.07268	-0.544267	0.528411
UMPS	-1.06984	-0.541845	0.527991
CEP43	-0.685158	-0.158985	0.526173
TADA1	-0.696049	-0.170198	0.525851
TADA2B	-0.70282	-0.178192	0.524628
SDHC	-1.50314	-0.983201	0.519937
HERPUD1	-0.546992	-0.0291616	0.517831
DPM1	-0.729509	-0.217475	0.512034
ARHGAP45	-0.539029	-0.0331288	0.5059
MED24	-0.91221	-0.40983	0.502381
WNK1	-1.32843	-0.827253	0.501179
IRF2	-0.43378	0.0618428	0.495623
RELB	-0.534265	-0.0466554	0.48761
PMM2	-0.695345	-0.208837	0.486508
CARM1	-0.885568	-0.399403	0.486165
DPM2	-0.824776	-0.340609	0.484167
DUT	-2.38215	-1.90434	0.477814
DNM2	-1.68181	-1.21113	0.470678
CAD	-0.972142	-0.503155	0.468987
UROD	-1.17142	-0.704731	0.466691
H2BC11	-2.48644	-2.0209	0.465543
SUPT7L	-0.51304	-0.0485234	0.464516
TFRC	-1.24903	-0.790047	0.458986
ADSS2	-0.981008	-0.522122	0.458886
LSM12	-0.92604	-0.467781	0.458259
UBE2G2	-0.731207	-0.276445	0.454762
SLC2A1	-0.90577	-0.451069	0.454701
IKBKB	-0.517904	-0.0634035	0.454501
GMPS	-1.47542	-1.02343	0.451989
ATP6AP1	-1.43513	-0.98425	0.450883
PAICS	-1.06007	-0.611481	0.44859
IPPK	-0.893207	-0.450122	0.443084
IKZF3	-0.44439	-0.00360202	0.440788
SUPT20H	-0.556011	-0.117813	0.438198
SDHB	-0.850929	-0.413995	0.436934
CAB39	-0.580682	-0.145688	0.434994
MTA2	-0.683964	-0.250548	0.433416
PPCDC	-0.551656	-0.119436	0.43222
CFLAR	-1.07415	-0.643583	0.430567
CHUK	-0.49939	-0.0710449	0.428345
NUP43	-1.38712	-0.959897	0.427218
ITPK1	-0.701242	-0.280499	0.420743
FAF2	-0.832104	-0.416531	0.415573
PDCD10	-0.189736	0.223822	0.413558
CREBBP	-0.476588	-0.0641807	0.412407
RPS4X	-2.7797	-2.36858	0.411119
LIPT1	-0.52078	-0.109874	0.410906
ATIC	-0.725645	-0.316109	0.409537
FBXO11	-0.61554	-0.207371	0.408168
ALG9	-0.459021	-0.0511067	0.407914
CFL1	-1.14213	-0.734473	0.40766
MTHFD1	-0.735967	-0.328538	0.407429
THAP11	-0.942938	-0.542885	0.400053
PFAS	-0.818466	-0.420271	0.398195
SEPHS2	-0.999251	-0.603048	0.396203
TUBB	-2.18583	-1.79431	0.39152
MED10	-0.852132	-0.463175	0.388957
CTBP1	-0.397697	-0.00945428	0.388243
TRPM7	-1.05601	-0.667788	0.388221
STK11	-0.483978	-0.096083	0.387895
PAXIP1	-0.526047	-0.140433	0.385614
OGDH	-0.939471	-0.555934	0.383537
CCNC	-0.634956	-0.252288	0.382668
SFPQ	-1.87676	-1.49492	0.381831
DLST	-0.816383	-0.434667	0.381716
VPS41	-0.881982	-0.50299	0.378991
CTPS1	-1.02707	-0.651597	0.375474
TSC2	-0.45287	-0.0788245	0.374046
SPC24	-2.79124	-2.41952	0.371717
TAF6L	-0.738962	-0.367798	0.371164
PSMB1	-2.22638	-1.8554	0.370972
ARID1A	-0.58923	-0.21971	0.36952
KDM5C	-0.558419	-0.189381	0.369038
SNAP23	-1.18301	-0.814292	0.368722
BCL2	-0.389509	-0.0216105	0.367898
DOT1L	-0.518045	-0.151265	0.36678
FLVCR1	-0.397291	-0.0305219	0.366769
NMT1	-1.02624	-0.659983	0.366253
PPIL1	-1.10263	-0.736628	0.365999
CDK7	-2.12025	-1.75665	0.363599
SNAPC5	-1.55807	-1.19519	0.362873
HSPA5	-1.3573	-0.997069	0.360234
AKIRIN2	-1.43586	-1.07627	0.359596
UFM1	-0.845246	-0.486801	0.358445
BRD4	-1.32958	-0.971694	0.357885
ZBTB38	-0.370541	-0.0127779	0.357763
RPL11	-2.77119	-2.41497	0.356226
THOC3	-1.84225	-1.48816	0.354088
IKZF1	-0.348346	0.00388934	0.352236
CPD	-0.578394	-0.23202	0.346375
UBE2M	-1.69944	-1.35403	0.345406
SMARCD1	-0.571047	-0.226765	0.344282
EED	-0.552561	-0.209011	0.34355
AHCY	-1.04395	-0.700401	0.343547
ALG3	-0.38638	-0.0437932	0.342586
PGM3	-0.557912	-0.21631	0.341602
MRGBP	-1.0994	-0.758078	0.341317
RARS2	-0.804373	-0.464002	0.340371
H2AC20	-1.34108	-1.00127	0.339805
NFKB2	-0.44359	-0.105839	0.337751
GART	-0.733919	-0.396471	0.337448
VPS54	-0.803881	-0.474835	0.329046
SDHD	-0.844023	-0.514985	0.329037
HDAC1	-0.492214	-0.163652	0.328563
PPP2R3C	-0.96247	-0.637274	0.325196
ATP6V1B2	-2.1333	-1.80897	0.324333
CNPY2	-0.594913	-0.27259	0.322323
FGFR3	-0.303002	0.0188309	0.321833
DHODH	-0.678135	-0.35773	0.320404
TINF2	-1.79973	-1.47967	0.320065
STRAP	-1.06851	-0.75086	0.317646
PCNA	-3.24918	-2.93322	0.31596
LIAS	-0.74864	-0.433792	0.314847
UBE2J1	-0.278852	0.0356054	0.314457
NDC1	-0.903494	-0.589356	0.314138
IGF1R	-0.615569	-0.301926	0.313643
DLD	-0.611587	-0.297961	0.313626
ACLY	-0.902565	-0.589522	0.313043
FPGS	-0.793072	-0.481314	0.311758
MED12	-0.796128	-0.485378	0.31075
DNAJB11	-0.518932	-0.209072	0.309859
RELA	-0.804872	-0.495678	0.309194
UBALD2	-0.471202	-0.162199	0.309003
DMXL1	-0.391488	-0.0836566	0.307831
SUZ12	-0.764898	-0.458977	0.305922
NRAS	-0.537799	-0.233441	0.304358
ELOA	-0.530565	-0.227693	0.302872
MPDU1	-0.48616	-0.184128	0.302032
ROCK2	-0.251197	0.0506546	0.301852
H2AZ1	-1.02811	-0.72699	0.301124
PFN1	-1.02193	-0.720853	0.301073
RPL37	-1.88616	-1.58558	0.300576
MED13L	-0.423483	-0.123048	0.300434
DUSP22	-0.53669	-0.237437	0.299254
EIF4A1	-1.68654	-1.38802	0.298523
TLE3	-0.39853	-0.101064	0.297465
RAB6A	-0.760483	-0.463755	0.296728
DRAP1	-0.679428	-0.38427	0.295158
MRPL33	-0.835978	-0.542299	0.293679
DDX39A	-0.484159	-0.192334	0.291825
PPIH	-0.609981	-0.318285	0.291696
XRCC6	-2.14308	-1.85351	0.289568
EXOSC6	-1.8336	-1.5454	0.288196
H1	-0.41158	-0.124317	0.287263
DPM3	-0.654373	-0.367299	0.287075
GLS	-0.426801	-0.140454	0.286347
COPG1	-1.62852	-1.34366	0.284855
DNAJC17	-1.59994	-1.31516	0.28478
CCM2	-0.309344	-0.0249201	0.284424
LRR1	-2.78288	-2.49966	0.283216
MBD2	-0.350719	-0.0688417	0.281878
PABPN1	-1.94116	-1.65931	0.281845
SGF29	-0.77723	-0.495802	0.281427
VAPA	-0.368867	-0.0882959	0.280571
AP2M1	-0.982795	-0.703213	0.279582
SETDB1	-0.691279	-0.412196	0.279083
IPMK	-0.357852	-0.078982	0.27887
TAFAZZIN	-0.723316	-0.444716	0.2786
AKT2	-0.352067	-0.0735682	0.278499
MED30	-2.29642	-2.01874	0.277676
MVK	-1.15786	-0.881785	0.276074
BUB3	-2.49366	-2.21765	0.276005
SIK3	-0.267532	0.00843828	0.275971
CPEB4	-0.217413	0.0582051	0.275618
RRM2	-2.62567	-2.35084	0.274823
XBP1	-0.260989	0.0133786	0.274367
ROCK1	-0.257414	0.0165349	0.273948
YARS2	-1.38875	-1.11493	0.273825
SOD2	-1.14141	-0.867685	0.273722
RPS15A	-2.85156	-2.57863	0.272932
GET3	-0.916868	-0.64493	0.271938
CENPA	-1.25408	-0.984147	0.269935
SP1	-0.48126	-0.211416	0.269844
AK2	-0.629777	-0.360463	0.269314
MED29	-1.13091	-0.862066	0.268842
ZEB1	-0.289093	-0.0210445	0.268048
MAD2L2	-1.19241	-0.924519	0.26789
PGD	-1.2198	-0.953249	0.266555
RAD51D	-0.82182	-0.555564	0.266255
TAF8	-1.04674	-0.781179	0.26556
PSMC1	-1.61292	-1.34742	0.265497
PSMA7	-2.64583	-2.38053	0.265298
SMG7	-0.791858	-0.527024	0.264834
RFK	-0.652361	-0.390228	0.262133
PAGR1	-0.392134	-0.130351	0.261782
DHX29	-0.288782	-0.0270026	0.26178
EFR3A	-0.656102	-0.394498	0.261604
TAOK1	-0.133869	0.127543	0.261412
ZNF296	-0.294489	-0.0335088	0.260981
RAD51C	-1.11663	-0.856245	0.260382
EZH2	-0.311059	-0.0516128	0.259446
MED9	-1.02632	-0.767227	0.259094
XRCC3	-0.904248	-0.645469	0.258779
TAF10	-1.15826	-0.899697	0.25856
MLLT10	-0.183624	0.0744658	0.25809
HNRNPH1	-1.29254	-1.03526	0.257277
SH3GL1	-0.430479	-0.174195	0.256283
XRN1	-0.933208	-0.677305	0.255903
NIP7	-2.26312	-2.00722	0.255891
ZNF592	-0.261695	-0.00681891	0.254876
IPO9	-0.850774	-0.596821	0.253953
MED16	-0.401211	-0.147496	0.253716
VPS39	-0.490354	-0.238064	0.25229
EPC1	-0.523108	-0.270833	0.252274
EMC6	-0.426867	-0.175031	0.251835
WASHC2C	-0.421851	-0.170875	0.250976
DTYMK	-1.8061	-1.55596	0.250135
SUPT4H1	-0.899966	-0.6502	0.249766
ATP6V1F	-1.49963	-1.24994	0.249691
SRM	-0.397924	-0.148283	0.249641
OAZ1	-0.369662	-0.120496	0.249166
PHF12	-0.700648	-0.45237	0.248278
ARID2	-0.648731	-0.402258	0.246473
CRAMP1	-0.459318	-0.213004	0.246315
GTF2H5	-0.368408	-0.125986	0.242422
DR1	-1.06234	-0.820284	0.242058
MED11	-2.27089	-2.02934	0.241548
ACSL4	-0.399731	-0.158341	0.241391
ATXN7	-0.192083	0.048655	0.240738
MICOS10	-0.739373	-0.499053	0.24032
SEL1L	-0.358842	-0.118728	0.240115
PET117	-0.350965	-0.111271	0.239695
MMGT1	-0.517573	-0.278755	0.238819
REEP4	-0.239539	-0.00101907	0.23852
SEC23B	-0.150098	0.0884161	0.238515
PPAT	-0.929694	-0.692084	0.23761
STAG2	-0.474734	-0.237272	0.237463
YBX1	-1.6767	-1.44056	0.236139
MLST8	-0.986657	-0.751129	0.235528
ARID3B	-0.368762	-0.134674	0.234088
CDK8	-0.231613	0.00210624	0.23372
TOMM40	-1.56728	-1.33453	0.232742
STX4	-0.668929	-0.437578	0.231351
IL6ST	-0.325847	-0.0952817	0.230565
EEF1B2	-1.14581	-0.915699	0.230115
HSPE1	-3.68172	-3.45252	0.229202
SMARCB1	-0.959465	-0.731274	0.22819
TCF4	-0.141805	0.0862151	0.22802
CHKA	-0.612851	-0.385425	0.227426
SNRNP40	-1.01336	-0.786838	0.226525
POU2AF3	-0.217339	0.00869439	0.226033
COX6A1	-0.87085	-0.645702	0.225147
UQCRFS1	-0.938889	-0.713858	0.225031
ISCA2	-0.820934	-0.595953	0.224981
ATXN2L	-0.349021	-0.1252	0.223821
MIOS	-0.594607	-0.370983	0.223624
MED17	-1.21434	-0.990738	0.223597
SEC63	-0.724861	-0.50138	0.22348
MED15	-0.508982	-0.285687	0.223296
FOXK1	-0.505234	-0.282087	0.223147
ATXN7L3	-0.467669	-0.24486	0.222809
SNAPC1	-1.87282	-1.65083	0.221989
RPS9	-2.29736	-2.07561	0.221748
DYRK1A	-0.244951	-0.0246589	0.220292
RPLP2	-1.55851	-1.339	0.219507
CYCS	-0.968152	-0.748819	0.219332
RPRD2	-0.509981	-0.290996	0.218984
TSC1	-0.210058	0.00868998	0.218748
GNPNAT1	-0.352088	-0.133769	0.218318
MAX	-1.02058	-0.803441	0.217142
N6AMT1	-0.535028	-0.318234	0.216794
CYC1	-0.691956	-0.476134	0.215822
ATP1A1	-1.20352	-0.98779	0.215732
MAT2A	-1.88616	-1.67076	0.215405
ELL2	-0.380888	-0.166704	0.214185
AFF1	-0.156051	0.0578914	0.213943
XPO4	-0.310416	-0.0970518	0.213364
PRELID1	-2.83958	-2.62631	0.213276
KIN	-1.66247	-1.44955	0.212926
VPS16	-0.652488	-0.439719	0.212769
YWHAQ	-0.146803	0.0659313	0.212734
GFPT1	-0.789358	-0.576633	0.212725
UBE2Q1	-0.461314	-0.249072	0.212243
VPS18	-1.08856	-0.876995	0.211569
ERN1	-0.194508	0.0168138	0.211322
MNT	-0.306344	-0.0953751	0.210969
AP2S1	-0.895424	-0.685151	0.210272
RICTOR	-0.583938	-0.374166	0.209772
COA5	-0.696789	-0.487094	0.209694
TADA3	-0.566801	-0.357287	0.209514
MAU2	-0.675391	-0.466193	0.209198
KCTD5	-0.235954	-0.0267723	0.209182
HNRNPU	-1.20143	-0.992549	0.208882
RPS6	-2.4138	-2.20514	0.208662
MIER3	-0.209504	-0.000867439	0.208637
SDHA	-0.440592	-0.232465	0.208127
SLC33A1	-0.457644	-0.250067	0.207577
FLI1	-0.278996	-0.0715501	0.207446
KMT2A	-0.43865	-0.23132	0.207329
HK2	-0.564935	-0.3577	0.207235
ARMH3	-0.26513	-0.0584671	0.206663
ATF7IP	-0.249214	-0.0425741	0.20664
LRP8	-0.361353	-0.154738	0.206615
FDPS	-0.887072	-0.682273	0.204799
SMG8	-0.538991	-0.334514	0.204476
UROS	-0.307306	-0.102871	0.204436
MNAT1	-0.77691	-0.572711	0.204198
VPS52	-0.657242	-0.453112	0.20413
NAPG	-1.01369	-0.809832	0.203857
UBE4B	-0.457045	-0.253867	0.203179
VPS33A	-0.720018	-0.51691	0.203108
NRBP1	-1.17734	-0.974307	0.20303
EMC3	-0.864161	-0.66219	0.201971
H2BC6	-1.52189	-1.31996	0.201934
ZMAT2	-1.7484	-1.54659	0.201805
ATP6AP2	-0.980042	-0.778325	0.201717
PIK3CA	-0.649199	-0.447684	0.201514
CRIP2	-0.170195	0.0312839	0.201479
PTMA	-0.732606	-0.531127	0.201479
CHD7	-0.212486	-0.0111181	0.201368
RAB13	-0.446748	-0.245529	0.201219
MUC20	-0.486176	-0.28521	0.200965
ATP6V0E1	-0.40404	-0.203126	0.200914
TOMM22	-1.37733	-1.17659	0.200742
WASHC3	-0.38408	-0.183477	0.200603
EMC7	-0.852048	-0.651696	0.200352
POU2AF2	-0.187246	0.0123294	0.199575
TAF13	-0.61988	-0.421201	0.198678
ZFAT	-0.259321	-0.0606515	0.19867
TPT1	-1.33607	-1.13756	0.198509
KPNA2	-0.539341	-0.340862	0.198479
ALAS1	-0.30944	-0.111305	0.198135
UQCRC1	-0.698067	-0.500344	0.197723
CITED2	-0.383825	-0.18674	0.197085
GPX4	-0.892444	-0.69608	0.196364
AP1M1	-0.265776	-0.0696684	0.196107
NUP37	-0.267885	-0.0720917	0.195793
SLC25A22	-0.398608	-0.203152	0.195456
MEAF6	-0.603287	-0.408768	0.194519
PCGF1	-0.29998	-0.105839	0.19414
PCGF5	-0.232498	-0.038378	0.19412
ORC6	-2.14334	-1.94938	0.193953
PSMG4	-1.73052	-1.53685	0.193665
EIF3L	-0.56691	-0.373398	0.193511
GAPVD1	-0.188037	0.0054359	0.193473
AUP1	-0.401777	-0.208366	0.193411
ELOF1	-0.581666	-0.388605	0.193061
NPEPPS	-0.552185	-0.359578	0.192607
FAM50A	-0.841978	-0.649653	0.192324
CDCA3	-0.455094	-0.262957	0.192137
RBM15	-0.471084	-0.279154	0.19193
GTF2H1	-0.921309	-0.729449	0.19186
SMARCE1	-0.931338	-0.739874	0.191464
SRSF2	-2.74861	-2.55775	0.190864
BRD9	-0.169296	0.0211994	0.190495
ZC3H4	-0.350523	-0.160353	0.19017
VPS8	-0.342251	-0.15233	0.189921
TFAP4	-0.554531	-0.365194	0.189337
MORF4L1	-0.30254	-0.113383	0.189157
COQ2	-0.642848	-0.453757	0.189092
C11orf58	-0.212193	-0.0235182	0.188675
YKT6	-1.73366	-1.54529	0.188371
WDR24	-0.710864	-0.522557	0.188307
MAPK14	-0.347568	-0.159382	0.188186
SLC38A5	-0.177213	0.010931	0.188144
GMPPB	-1.15382	-0.966835	0.186985
SLC20A1	-0.526154	-0.339308	0.186846
POU2F1	-0.455994	-0.2692	0.186794
QARS1	-1.91743	-1.73089	0.186538
GSS	-0.155272	0.0312442	0.186516
SMCHD1	-0.294286	-0.107984	0.186303
ADIPOR2	-0.178448	0.00766718	0.186115
SLC7A6OS	-1.2307	-1.04466	0.186036
SEM1	-1.26192	-1.07611	0.185813
COX7C	-0.839965	-0.65439	0.185574
GCLC	-0.206932	-0.0214682	0.185464
C1orf109	-1.49344	-1.30802	0.185421
NF2	0.0913238	0.276057	0.184733
RUNX2	-0.45041	-0.266248	0.184161
COQ4	-0.824072	-0.640096	0.183976
SLC35B1	-1.33002	-1.14631	0.183717
COPS6	-1.79381	-1.61011	0.183699
FDX1	-0.43425	-0.250554	0.183696
ATP6V0C	-2.68674	-2.50388	0.182867
CCDC134	-0.1513	0.0303577	0.181657
NAA25	-0.783441	-0.602289	0.181152
JAK1	-0.254194	-0.0732635	0.180931
CNBP	-0.334168	-0.15352	0.180648
SNX27	-0.260535	-0.0800326	0.180502
BAZ2A	-0.25748	-0.0771905	0.18029
KRIT1	-0.0972585	0.0825966	0.179855
UFL1	-0.567614	-0.387824	0.17979
STMN1	-0.184151	-0.00628694	0.177864
EPHA2	-0.161453	0.0153824	0.176835
RUNX1	-0.185565	-0.00875693	0.176808
CHP1	-0.306657	-0.130165	0.176491
SMG6	-1.15691	-0.980429	0.176481
COX17	-0.983089	-0.806796	0.176294
SUPT5H	-1.74314	-1.56728	0.17587
MYH9	-0.723618	-0.547798	0.17582
OSTC	-0.676698	-0.501226	0.175472
PDCD6	-0.492599	-0.318256	0.174343
NKAP	-1.27924	-1.1052	0.174042
BRD2	-0.549096	-0.3753	0.173796
API5	-0.329362	-0.156615	0.172747
BATF3	-0.140728	0.0314266	0.172155
BTAF1	-0.605781	-0.433896	0.171884
MASTL	-1.45035	-1.27875	0.171603
KPNB1	-2.25181	-2.08044	0.171378
AAAS	-0.398674	-0.227306	0.171368
YWHAE	-0.684205	-0.513437	0.170767
ALAD	-0.27247	-0.102268	0.170202
KBTBD2	-0.287953	-0.117962	0.169991
RINT1	-1.14374	-0.974092	0.169647
RPL7A	-2.15117	-1.98183	0.169344
OXSR1	-0.192011	-0.0228337	0.169177
RIC1	-0.749958	-0.580968	0.168989
FADD	-0.484067	-0.315211	0.168857
RPS29	-3.18204	-3.01333	0.168705
MAPKAPK5	-0.348759	-0.180607	0.168152
CUX1	-0.0670072	0.100997	0.168004
RPLP1	-1.74099	-1.57373	0.167257
HDAC2	-0.16939	-0.00250521	0.166885
AZIN1	-0.288274	-0.1214	0.166874
GCSH	-0.531674	-0.364885	0.16679
STK17B	-0.0953806	0.0713056	0.166686
ZNF492	-1.03139	-0.86478	0.166606
MED28	-1.4694	-1.30293	0.166477
USP22	-0.0723572	0.0941174	0.166475
VDAC2	-0.403635	-0.237558	0.166078
ATP6V1G1	-1.28764	-1.12158	0.16606
HSPA8	-0.975207	-0.809602	0.165605
PRKAR1A	-0.315878	-0.150543	0.165335
PDZK1	-0.471931	-0.30724	0.164691
COMMD8	-0.344875	-0.180207	0.164667
ARID3A	-0.207843	-0.043329	0.164514
RBBP6	-1.20478	-1.04035	0.164427
ACIN1	-0.917588	-0.754451	0.163137
SF3B5	-3.29412	-3.13103	0.163092
GPAT4	-0.122614	0.040174	0.162788
PDE4DIP	-0.712675	-0.549993	0.162682
HSP90B1	-0.789633	-0.627263	0.16237
POC1A	-0.474372	-0.312199	0.162173
SMARCD2	-0.345096	-0.183147	0.161949
TRAIP	-0.812372	-0.650484	0.161887
EEFSEC	-0.600017	-0.438472	0.161545
HNRNPD	-0.388456	-0.227118	0.161338
KDSR	-0.368537	-0.20765	0.160887
DNAAF5	-0.305236	-0.144625	0.160611
FEM1B	-0.343226	-0.18279	0.160436
STAT3	-0.317805	-0.15811	0.159695
H2AC8	-0.599379	-0.439819	0.15956
AMOTL2	-0.0640194	0.0954159	0.159435
SLC38A2	-0.519415	-0.360186	0.159228
SAP30BP	-1.85278	-1.69388	0.158898
GCLM	-0.191921	-0.0333233	0.158598
MARS2	-0.992792	-0.834705	0.158087
COX5B	-0.635158	-0.477126	0.158032
ELOB	-1.61846	-1.46065	0.157814
DNAJC7	-0.285163	-0.127623	0.157539
GTF2I	-0.315368	-0.15828	0.157088
DDI2	-0.333641	-0.176659	0.156982
MTF1	-0.399246	-0.242542	0.156704
RING1	-0.396642	-0.240142	0.1565
ARL8B	-0.382542	-0.226146	0.156397
RPL8	-2.95583	-2.79967	0.156168
CCDC115	-0.923022	-0.76717	0.155852
SS18L2	-2.27397	-2.11889	0.155077
RB1	0.0308454	0.185428	0.154583
ZNF800	-0.0809804	0.0735036	0.154484
SLC38A1	-0.244788	-0.0903615	0.154427
BICRA	-0.107434	0.0468002	0.154235
RBSN	-0.5411	-0.386902	0.154197
WDR44	-0.313205	-0.159056	0.154149
CASC3	-0.582552	-0.428425	0.154127
GOLGA7	-0.115186	0.0387504	0.153936
NDUFA2	-0.622661	-0.468738	0.153923
FLCN	-0.309186	-0.15541	0.153776
IRS2	-0.490779	-0.337311	0.153469
HSP90AB1	-0.416043	-0.262858	0.153185
CHCHD3	-0.51506	-0.361985	0.153075
KHDC4	-0.325676	-0.17278	0.152896
FNIP1	-0.121369	0.0314853	0.152854
NCOA2	-0.0967666	0.0549329	0.1517
CPOX	-0.458158	-0.306491	0.151666
BRPF1	-0.400362	-0.248751	0.151611
SIRT1	-0.135459	0.0161058	0.151565
SPTY2D1	-0.0622317	0.0892165	0.151448
NUS1	-1.8164	-1.66515	0.151245
SREBF2	-0.241849	-0.0915075	0.150342
NAA15	-1.16725	-1.01697	0.150281
TRMT112	-2.04774	-1.89759	0.150154
RPL10A	-2.48864	-2.3385	0.150134
LUZP1	-0.154394	-0.00439811	0.149996
KAT6A	-0.280246	-0.130426	0.14982
NBPF3	-0.290871	-0.141279	0.149592
CTDSP1	-0.170525	-0.0210038	0.149522
OCLN	-0.2872	-0.137762	0.149438
LAMTOR4	-0.612702	-0.463391	0.14931
UTP23	-1.02299	-0.873738	0.149251
KHDC1	-0.162123	-0.0130775	0.149045
ETV3	-0.169697	-0.020726	0.148971
GNA11	-0.330461	-0.181543	0.148918
TMEM41B	-0.485689	-0.336896	0.148793
H2BC4	-1.84809	-1.69942	0.148671
SLC35G3	-0.304648	-0.156032	0.148616
FEM1C	-0.17191	-0.0233226	0.148587
ADD1	-0.166962	-0.0184476	0.148514
SCAP	-1.14128	-0.992863	0.148412
YY1	-0.92415	-0.776301	0.147848
MRPS24	-0.61692	-0.470037	0.146883
DPF2	-0.652323	-0.505524	0.146799
BRCA2	-0.509124	-0.362629	0.146495
TTC7A	-0.38583	-0.239431	0.146398
AGO2	-0.180636	-0.0343094	0.146327
DET1	-0.406124	-0.260018	0.146106
RACK1	-1.99719	-1.85125	0.145937
SMG9	-0.213508	-0.0675968	0.145911
SRSF10	-0.892087	-0.746583	0.145504
EIF3E	-1.41413	-1.26864	0.14549
FGD5	-0.221548	-0.0761204	0.145428
CMKLR1	-0.13147	0.0138347	0.145305
VOPP1	-0.547675	-0.402513	0.145162
LEMD3	-0.394647	-0.249531	0.145116
SETBP1	-0.0778858	0.0671002	0.144986
TCEA1	-0.218721	-0.0740792	0.144642
SMARCA5	-0.634932	-0.490318	0.144614
AIP	-0.28143	-0.137184	0.144245
PRKAA1	-0.0932852	0.0509289	0.144214
SCYL1	-0.636161	-0.491975	0.144186
HEATR3	-0.430525	-0.286775	0.14375
UBE2G1	-0.138353	0.00521732	0.14357
SF3A1	-1.79557	-1.65207	0.143496
SEC14L1	-0.0422251	0.10126	0.143485
CIART	-0.391232	-0.247832	0.1434
PSMB8	-0.0974176	0.0456181	0.143036
SRSF6	-0.769906	-0.62701	0.142896
TXNL4A	-2.42068	-2.2778	0.142874
CIT	-0.631988	-0.489202	0.142786
POLR2D	-2.11826	-1.97551	0.142747
AGPAT1	-0.276927	-0.134197	0.14273
TAF12	-0.916515	-0.773802	0.142713
CERT1	-0.223815	-0.0811484	0.142667
JAGN1	-0.0168562	0.12569	0.142546
OSBPL9	-0.331358	-0.189187	0.142171
CCNH	-1.23927	-1.09762	0.141642
H2AC21	-0.447184	-0.305773	0.14141
TCF12	-0.137906	0.00348038	0.141386
SS18	-0.0775969	0.0635402	0.141137
DDX6	-0.91731	-0.776231	0.141079
CYP2A13	-0.37866	-0.23774	0.14092
FAM133B	-1.11464	-0.973775	0.140865
GADD45B	-0.154053	-0.0135551	0.140498
NUP88	-1.56384	-1.42337	0.140468
TGFBRAP1	-0.442994	-0.302751	0.140243
SLC4A7	-0.623861	-0.483711	0.14015
RUVBL1	-1.85584	-1.71572	0.140118
NIPBL	-0.482226	-0.342181	0.140045
INO80D	-0.0795306	0.0604455	0.139976
DNAJC3	-0.113767	0.026185	0.139952
UBE2J2	-0.412435	-0.272635	0.1398
ENTREP3	-0.270273	-0.130812	0.139461
PBRM1	-0.251174	-0.111808	0.139366
CLINT1	-0.166935	-0.0277802	0.139154
KLHDC3	-0.215376	-0.0763424	0.139034
KRTAP10	-0.583407	-0.444383	0.139024
KRTAP10	-0.230562	-0.091587	0.138975
CCNL1	-0.706044	-0.567279	0.138765
COA7	-0.538294	-0.39958	0.138715
SNX18	-0.295755	-0.157216	0.138538
UBQLN4	-0.800166	-0.661714	0.138452
HYDIN	-0.403619	-0.265169	0.13845
HJV	-0.511042	-0.372813	0.13823
RNF115	-0.220504	-0.0823564	0.138148
PRKD3	-0.167344	-0.0292123	0.138132
BLOC1S3	-0.268109	-0.130076	0.138034
GET4	-0.476307	-0.338395	0.137913
SAP18	-1.28033	-1.14243	0.137905
MAPK6	-0.283007	-0.145109	0.137898
PDE7A	-0.154338	-0.0164723	0.137866
SKIC8	-0.957083	-0.819244	0.137839
ATF4	-0.687314	-0.549487	0.137827
APOA1	-0.0886259	0.0490787	0.137705
IFITM2	-0.407818	-0.270137	0.137681
SCAF8	-0.146161	-0.00869147	0.13747
COX6C	-0.584642	-0.447225	0.137417
COPS7B	-0.0684746	0.0683584	0.136833
TMEM121	-0.188362	-0.0517376	0.136624
L3MBTL3	-0.112645	0.0238595	0.136505
PACS2	-0.206197	-0.0700109	0.136187
EIF6	-1.64391	-1.50802	0.135886
COX6B1	-0.603793	-0.468054	0.135739
MLLT3	-0.168306	-0.0326897	0.135616
PI4KB	-0.46444	-0.328923	0.135518
KRTAP4	-1.2823	-1.14687	0.13543
KMT2C	-0.0829399	0.0521284	0.135068
STN1	-0.508795	-0.37382	0.134975
PRDX6	-0.154197	-0.0196052	0.134592
ARMCX6	-0.31809	-0.183498	0.134592
XPO5	-0.713152	-0.578751	0.1344
WDR20	-0.257764	-0.123584	0.134181
SUPT3H	-0.264716	-0.130575	0.134141
COASY	-0.604327	-0.470353	0.133974
COX7B	-0.78194	-0.648002	0.133938
RAP2B	-0.0943434	0.038962	0.133305
PSMD2	-1.56054	-1.42772	0.132814
PPIL4	-1.10847	-0.975741	0.132731
FBXW11	-0.659462	-0.526834	0.132628
NFE2L3	-0.569313	-0.436956	0.132357
ATP5F1D	-0.914681	-0.782344	0.132337
BATF	-0.135353	-0.00315118	0.132202
BRD7	-0.454681	-0.322654	0.132026
TAF11	-0.357031	-0.225006	0.132024
CFAP68	-0.043256	0.0882804	0.131536
CDYL	-0.173322	-0.0418461	0.131476
UHMK1	-0.0448907	0.0865581	0.131449
HPS1	-0.277495	-0.146065	0.13143
WASHC5	-0.295795	-0.164558	0.131238
AP3B1	-0.333245	-0.202259	0.130986
LHFPL2	-0.0420559	0.0887148	0.130771
H4C9	-0.300619	-0.169929	0.13069
ATP6V0B	-1.22146	-1.09086	0.130607
TMEM147	-0.278694	-0.148105	0.13059
COG3	-0.955533	-0.824999	0.130534
TSPYL1	-0.103561	0.0269262	0.130487
TP53	0.298044	0.42849	0.130446
KHSRP	-0.307857	-0.17751	0.130347
PTBP1	-0.580345	-0.450106	0.130239
PAWR	0.0399011	0.169972	0.130071
NUDT21	-1.94708	-1.81711	0.129978
GATAD1	-0.329142	-0.199326	0.129816
PTAR1	-0.391006	-0.2613	0.129707
PMF1	-1.48191	-1.35302	0.128892
FIGNL1	-0.153592	-0.0250979	0.128494
MED18	-1.00173	-0.873592	0.12814
MRPS16	-0.701696	-0.57386	0.127835
COMMD7	-0.232064	-0.104259	0.127806
EDRF1	-0.168638	-0.0411804	0.127457
NOP9	-0.998205	-0.871118	0.127087
CCDC47	-0.320199	-0.193156	0.127043
SEH1L	-1.31112	-1.18409	0.127028
PPP1R15B	-0.905798	-0.778915	0.126883
GBA1	-0.221088	-0.0945706	0.126517
CYRIB	7.25268e-05	0.126549	0.126477
IL17RC	-0.0776054	0.0486682	0.126274
PHF13	-0.171355	-0.0450925	0.126262
FECH	-0.693969	-0.568115	0.125854
VMA21	-0.446343	-0.320799	0.125544
ATP5F1B	-0.925481	-0.800524	0.124958
IQCB1	-0.282793	-0.157863	0.12493
DIP2B	-0.408692	-0.283935	0.124758
DNAJB9	-0.0765831	0.0478353	0.124418
RCC2	-0.311784	-0.187418	0.124365
PDCD2L	-0.131289	-0.0069305	0.124358
TPSG1	-0.0979153	0.0264082	0.124323
ZC3H10	-0.322785	-0.198597	0.124187
ITLN2	-0.140938	-0.016782	0.124156
PLCG1	-0.0726007	0.0515235	0.124124
SLC16A1	-0.376363	-0.252241	0.124121
AMBRA1	-0.25128	-0.127213	0.124067
SERTAD2	-0.151504	-0.0275857	0.123918
EXOSC2	-1.33984	-1.21597	0.123869
GTF2H4	-0.938998	-0.815137	0.123861
SUV39H1	-0.105228	0.0185385	0.123766
TRIB1	-0.146578	-0.0229878	0.12359
PRR14	-0.251118	-0.127735	0.123383
TAOK2	-0.0768916	0.0462548	0.123146
NCOA5	-0.266151	-0.143198	0.122952
NCBP1	-1.64975	-1.52695	0.122803
PITPNB	-0.145457	-0.0226865	0.12277
CCNF	-0.225897	-0.10325	0.122647
UBE2K	-0.283756	-0.161135	0.122621
BMI1	-0.059822	0.0625945	0.122417
CEBPG	-0.176742	-0.0544269	0.122315
NDUFV2	-0.330018	-0.207922	0.122096
CCDC71L	-0.179152	-0.0570584	0.122093
PSIP1	-0.0421243	0.0798894	0.122014
BIRC5	-2.13982	-2.01804	0.12178
MRPS15	-0.491812	-0.37012	0.121692
IKBKG	-0.337364	-0.215796	0.121568
TRIM28	-0.405301	-0.283921	0.121379
PLEKHN1	-0.295645	-0.174342	0.121304
DAXX	-0.425993	-0.305047	0.120947
CDK13	-0.184831	-0.0639104	0.12092
LCE3A	-0.51012	-0.389404	0.120716
NBAS	-0.666188	-0.545572	0.120616
SIK2	-0.154314	-0.0337381	0.120576
PPP1R18	-0.125428	-0.00491051	0.120517
COX16	-0.212122	-0.091674	0.120448
TMEM97	-0.352492	-0.232455	0.120037
MVD	-0.757833	-0.637979	0.119854
HMGA1	-0.944476	-0.82466	0.119816
MPZL1	-0.272869	-0.153101	0.119767
MED13	-0.108525	0.0109202	0.119445
MEF2D	-0.224157	-0.104814	0.119344
XRCC2	-0.58265	-0.463435	0.119215
NDUFB4	-0.607553	-0.488412	0.119141
PTP4A1	-0.40925	-0.290187	0.119063
UPF3B	-0.214118	-0.0950665	0.119051
SUB1	-0.16771	-0.0487948	0.118916
NDUFC2	-0.65912	-0.540445	0.118675
ZFC3H1	-0.592735	-0.474084	0.118651
FITM2	-0.109704	0.00892868	0.118633
TUBB2A	-0.0680751	0.0504869	0.118562
CEP55	-0.440928	-0.322377	0.118551
RCOR1	-0.409189	-0.290654	0.118534
EMSY	-0.161005	-0.0426135	0.118392
MAP2K2	-0.309529	-0.191188	0.118341
SETD2	-0.479274	-0.360995	0.118279
MON2	-0.211158	-0.0928834	0.118275
SDHAF4	0.025839	0.143972	0.118133
HOOK2	-0.0107178	0.107257	0.117975
FBLIM1	-0.567194	-0.449227	0.117967
VKORC1L1	-0.314581	-0.196645	0.117937
ATF1	-0.257575	-0.139757	0.117818
SLC5A3	-0.294102	-0.176411	0.11769
PCBP2	-1.43205	-1.31438	0.117673
TOMM40L	-0.22499	-0.107362	0.117629
SHE	-0.344046	-0.226466	0.11758
YWHAB	-0.200282	-0.0827528	0.11753
TAF5	-0.865176	-0.747657	0.117519
IL6R	-0.207029	-0.0898462	0.117182
SAE1	-1.49162	-1.37447	0.117151
ST3GAL1	-0.394919	-0.277973	0.116947
ATP5F1C	-0.668592	-0.551667	0.116925
ATP6V0D1	-1.45738	-1.34048	0.116902
PSME2	-0.290554	-0.173659	0.116895
MRPS31	-0.527191	-0.410361	0.11683
REX1BD	-0.224702	-0.107935	0.116767
CCDC6	-0.345809	-0.229311	0.116498
BATF2	-0.150074	-0.0336263	0.116447
UQCRC2	-0.641012	-0.524577	0.116435
IMP3	-1.66721	-1.55084	0.116369
FBXO36	-0.210622	-0.0942625	0.11636
RCAN3	-0.07729	0.0390421	0.116332
GGCT	-0.0767627	0.0395255	0.116288
USF1	-0.287972	-0.171952	0.116019
EMC1	-0.47876	-0.362883	0.115877
XPNPEP3	-0.20368	-0.0878638	0.115816
AMFR	-0.268766	-0.153027	0.115739
IRF1	-0.0623018	0.0533242	0.115626
RPL26L1	-0.641917	-0.526383	0.115534
PSTK	-0.539307	-0.423873	0.115433
BRIP1	-0.373459	-0.25819	0.115269
PYM1	-0.471187	-0.355919	0.115268
FASTKD5	-0.378371	-0.263197	0.115173
B3GNT2	-0.2751	-0.160057	0.115043
CDKN2AIPNL	-0.242934	-0.128196	0.114738
GPN2	-2.09913	-1.9844	0.114733
ME2	-0.143701	-0.0291204	0.11458
SLC30A5	-0.0967086	0.0178622	0.114571
RPL35	-1.59245	-1.47795	0.114503
RUNX3	-0.225209	-0.110788	0.114421
COQ10B	-0.258848	-0.14453	0.114319
CTC1	-0.449171	-0.334899	0.114271
MS4A4A	-0.106797	0.0074481	0.114245
TARDBP	-1.12366	-1.00942	0.114241
EIF5A	-1.20725	-1.09311	0.114141
SLC7A5	-0.437392	-0.323325	0.114067
PCIF1	-0.261439	-0.147512	0.113927
SPTLC1	-0.772561	-0.658829	0.113733
PEDS1	-0.229534	-0.115864	0.11367
INSR	-0.190817	-0.0774456	0.113372
ZMIZ2	-0.136185	-0.0229555	0.11323
PODXL2	-0.111307	0.0019214	0.113229
PPCS	-0.46843	-0.355226	0.113205
EIF3F	-1.61509	-1.50192	0.113171
S100A12	-0.259247	-0.146126	0.113121
BPTF	-0.856702	-0.743735	0.112967
PRKAA2	-0.222548	-0.109702	0.112845
DICER1	-0.540339	-0.427502	0.112837
METTL25B	-0.116775	-0.00398441	0.112791
POT1	-0.474966	-0.362214	0.112752
BCL3	-0.0109881	0.101534	0.112522
FCRL6	-0.188107	-0.0757295	0.112378
ELF2	-0.365863	-0.25353	0.112333
NUP50	-0.735936	-0.623604	0.112333
SND1	-0.0431987	0.0689491	0.112148
FAR1	-0.121259	-0.00913967	0.112119
ZNF273	-0.434737	-0.322901	0.111836
TMEM199	-0.676249	-0.56472	0.111529
HUS1B	-0.0211374	0.090255	0.111392
HAUS6	-1.36462	-1.25325	0.11137
THAP1	-1.23348	-1.12256	0.110914
TSNARE1	-0.155712	-0.0448877	0.110824
SLC25A3	-0.820759	-0.709984	0.110775
ING5	-0.0979527	0.0126084	0.110561
FGFBP3	-0.238825	-0.128475	0.11035
TOR1B	-0.130916	-0.0206472	0.110269
ARF6	-0.422045	-0.311895	0.11015
ZMYND11	-0.125209	-0.0151938	0.110015
HUS1	-0.534503	-0.424557	0.109946
RPL12	-2.81679	-2.70702	0.109771
H3C8	-0.703013	-0.593312	0.109701
RPL23	-3.02031	-2.91085	0.109458
CLEC4G	-0.165675	-0.056453	0.109222
CTNNBIP1	-0.241764	-0.132697	0.109066
PHC1	-0.351232	-0.242194	0.109038
DPH2	-0.403309	-0.294302	0.109007
THOC5	-1.3615	-1.25266	0.108831
ARGFX	-0.109184	-0.000583524	0.1086
PSMD12	-1.80053	-1.69243	0.108095
CARS2	-0.344532	-0.236652	0.10788
HAX1	-0.342685	-0.234869	0.107816
P2RY2	-0.215046	-0.107481	0.107566
DNAJB6	-0.47851	-0.370947	0.107563
APOC3	-0.102315	0.00524455	0.10756
POLM	-0.188513	-0.0810473	0.107466
SFR1	-0.357688	-0.250433	0.107255
ZNF142	-0.13421	-0.0269915	0.107219
SMNDC1	-1.07847	-0.971309	0.107159
BAHD1	-0.249733	-0.142626	0.107107
CDK2AP2	-0.305646	-0.198565	0.107081
MAP3K4	-0.120937	-0.0140481	0.106889
MBD6	-0.267573	-0.160753	0.10682
ITSN2	-0.143869	-0.0371629	0.106706
UBL7	-0.192825	-0.0861729	0.106653
LYRM2	-0.310997	-0.204413	0.106583
ZNF384	-0.149136	-0.0426132	0.106523
CYP4Z1	-0.0415504	0.0649018	0.106452
BRD8	-0.574993	-0.468541	0.106452
PCYT2	-0.254698	-0.148295	0.106403
SEC62	-0.41815	-0.311957	0.106193
CHMP5	-0.626348	-0.520242	0.106106
LINS1	-0.0951035	0.0109764	0.10608
TMEM161B	-0.106487	-0.000456154	0.106031
COG5	-0.223128	-0.11718	0.105948
TARBP2	-0.312215	-0.206364	0.105852
SMCR8	-0.184266	-0.0785897	0.105676
ZNF792	-0.185172	-0.0796395	0.105533
AQP12B	-0.345192	-0.239753	0.105439
SFMBT1	-0.121413	-0.016022	0.105391
AHCYL2	-0.181226	-0.0758762	0.10535
CREG1	-0.231849	-0.126581	0.105268
DOLPP1	-0.325833	-0.22069	0.105143
PTTG1	-0.552526	-0.447441	0.105085
CMIP	-0.424966	-0.319889	0.105077
STK17A	-0.124042	-0.0190589	0.104983
MINDY1	-0.243912	-0.138973	0.104939
TBRG4	-0.262405	-0.157511	0.104894
MTRF1L	-0.496334	-0.391733	0.104601
MTF2	-0.202229	-0.0977318	0.104497
VPS53	-0.456953	-0.35265	0.104303
SMG5	-1.22343	-1.11913	0.104299
CDC25A	-0.481214	-0.376937	0.104277
NSUN2	-0.0675573	0.0365389	0.104096
KRT80	-0.172347	-0.0685011	0.103846
CLEC16A	-0.042712	0.0611318	0.103844
COPZ1	-1.62031	-1.5167	0.103615
TSR1	-1.35908	-1.25559	0.103491
ARF4	-0.84953	-0.746057	0.103472
RAF1	-0.261456	-0.157995	0.103461
MTOR	-1.18131	-1.07795	0.103356
ENC1	-0.0872121	0.0160996	0.103312
SRSF11	-1.17072	-1.06744	0.103281
C4orf46	-0.187203	-0.0839477	0.103255
KIAA1191	-0.0961607	0.00708663	0.103247
KIAA2013	-0.408432	-0.305289	0.103143
PDXK	-0.147645	-0.0445382	0.103107
POLR2E	-1.90883	-1.80575	0.103079
H2BC8	-0.647424	-0.544384	0.10304
COG4	-0.532395	-0.429433	0.102962
CASP10	-0.179723	-0.0768471	0.102876
ZNF284	-0.251706	-0.148836	0.10287
UGP2	-0.427479	-0.325079	0.102401
RPL22	-0.954842	-0.852464	0.102378
HDAC8	-0.185491	-0.0831967	0.102294
MICOS13	-0.378384	-0.276143	0.102241
MRPL37	-0.574633	-0.472483	0.10215
SYNCRIP	-0.43521	-0.333113	0.102097
PDIA6	-0.0541932	0.0478927	0.102086
ALG5	-0.33878	-0.23677	0.10201
SKIL	-0.137186	-0.0352162	0.10197
H2AC6	-0.932344	-0.830378	0.101966
HLA	-0.29329	-0.191326	0.101964
CIITA	-0.0622586	0.0395777	0.101836
SF3B3	-2.65129	-2.54946	0.101833
PARS2	-0.581398	-0.479669	0.101729
EAF2	-0.0891697	0.0123744	0.101544
PPWD1	-2.12171	-2.0202	0.101511
NDUFB8	-0.522966	-0.421467	0.101499
BCAS2	-1.31542	-1.21402	0.101404
SNAPC2	-1.5841	-1.48276	0.101334
THOC6	-0.535446	-0.434175	0.101271
NSD3	-0.0037224	0.0975465	0.101269
NIT1	-0.0491707	0.0518296	0.101
ABCF3	-0.0323308	0.0686174	0.100948
HES2	-0.133049	-0.03214	0.100909
HSPB2	-0.058871	0.041936	0.100807
CSNK2B	-1.06053	-0.959801	0.100728
ACSL1	-0.0657865	0.0347576	0.100544
ATAD3C	0.00642366	0.106924	0.1005
ZNF460	-0.0607655	0.0397198	0.100485
PLEKHA1	0.134616	0.235025	0.100409
C2orf50	-0.0557837	0.0445736	0.100357
HMGN3	-0.058286	0.0420299	0.100316
SH2B1	-0.152473	-0.0522013	0.100272
PSMC5	-1.58225	-1.48198	0.100267
C2orf80	-0.0956428	0.00458249	0.100225
ZNF207	-1.2339	-1.13371	0.100193
VPS51	-0.658432	-0.558377	0.100055
TOR1A	-0.149069	-0.049075	0.0999941
SUPT6H	-2.05294	-1.95301	0.0999304
H2BC10	-0.267639	-0.167987	0.0996523
KRTAP13	-0.0862995	0.0133514	0.0996509
RAP2C	0.0338749	0.133475	0.0996005
ZNF322	-0.403475	-0.303942	0.0995329
GATC	-0.409622	-0.310658	0.0989632
COQ6	-0.0917631	0.00718874	0.0989519
RPS20	-2.94939	-2.85055	0.0988437
CCNT1	-0.324352	-0.22551	0.0988417
MIS18A	-0.873586	-0.774748	0.0988388
MED25	-0.374372	-0.275552	0.09882
HNRNPA1	-0.560925	-0.462218	0.0987067
SCO1	-0.298823	-0.200148	0.098675
RAB30	-0.0544128	0.0442504	0.0986632
NPPB	0.0336442	0.132098	0.0984537
STT3A	-0.372061	-0.273639	0.0984217
DAZAP1	-0.294463	-0.196116	0.0983464
KCTD9	-0.198318	-0.0999915	0.0983263
CRYGA	-0.11984	-0.0216232	0.0982165
WWC1	-0.0287869	0.0693653	0.0981522
WAS	-0.0481017	0.049992	0.0980936
NCLN	-0.210005	-0.111923	0.0980815
HORMAD1	-0.281678	-0.183635	0.098043
MOSMO	-0.0840378	0.013938	0.0979758
MRPL41	-0.885886	-0.788073	0.0978131
SLAMF9	-0.269228	-0.17153	0.0976984
BLTP2	-0.502173	-0.404514	0.097659
GALE	-0.274843	-0.177301	0.0975423
ERCC4	-0.31145	-0.213932	0.0975178
ERLEC1	-0.135879	-0.0384285	0.09745
EIF4G1	-0.90643	-0.809	0.0974299
CDC37	-1.39978	-1.30258	0.0971968
CHORDC1	-0.765331	-0.668153	0.0971778
APOA2	-0.1168	-0.0197403	0.0970596
ENSA	-0.473585	-0.376594	0.0969914
TRAF2	-0.422054	-0.325153	0.0969013
ODC1	0.000253435	0.0970241	0.0967707
CARD19	-0.101136	-0.00436773	0.0967683
SBDS	-1.90289	-1.80621	0.096676
APPBP2	-0.131481	-0.0348259	0.096655
POLE2	-1.57928	-1.48276	0.0965224
MAF1	-0.347242	-0.250734	0.0965084
TAP2	-0.0296153	0.0668726	0.0964879
MED20	-1.39109	-1.29474	0.0963533
SARNP	-0.58767	-0.491406	0.0962647
ARHGAP1	-0.20507	-0.10891	0.0961603
UCK2	-0.211142	-0.115007	0.0961351
ST3GAL2	-0.149859	-0.0537351	0.0961236
SLC7A1	-0.393203	-0.297241	0.0959624
SERTAD1	-0.00228376	0.093641	0.0959248
CD164	-0.248744	-0.152981	0.095763
TCF19	-0.0676801	0.0279513	0.0956314
TDG	-0.384758	-0.28927	0.0954882
MTMR14	-0.0683697	0.027015	0.0953848
UBE3B	0.00876435	0.104148	0.0953841
GRSF1	-0.339725	-0.244436	0.0952886
SMS	-0.503446	-0.408206	0.0952407
CCDC32	-0.189199	-0.0941883	0.0950106
PACSIN3	-0.299425	-0.20443	0.0949954
TRNAU1AP	-0.476449	-0.381462	0.0949873
KRTAP5	-0.456323	-0.361399	0.0949244
TPK1	-0.191073	-0.0961539	0.0949188
RAD51B	-0.361644	-0.266771	0.0948728
LRP10	-0.0581901	0.0366428	0.0948328
SCAF1	-0.412725	-0.317948	0.0947772
S100A13	-0.0566518	0.0380404	0.0946922
CPEB3	-0.103733	-0.00911669	0.0946166
POLR2I	-1.88799	-1.79344	0.0945577
GIGYF2	-0.314884	-0.220372	0.094512
CR1L	-0.238026	-0.143518	0.0945071
EIF3M	-1.02357	-0.929191	0.0943833
FHIP2A	-0.00745135	0.0868097	0.094261
RBBP4	-1.47232	-1.3781	0.0942214
RHOBTB3	-0.158509	-0.0643386	0.0941707
BLK	0.0274304	0.121593	0.0941623
PTP4A2	-0.364531	-0.270418	0.0941133
TTF2	-0.716584	-0.622619	0.0939654
SV2A	-0.339363	-0.245541	0.0938218
MOK	-0.210033	-0.116264	0.0937688
SYNGR1	-0.132406	-0.0386525	0.093753
TEDC1	-0.372839	-0.279126	0.0937129
AJUBA	-0.0680928	0.0256057	0.0936985
TMOD3	-0.162712	-0.0690845	0.0936278
LRRC37B	-0.456591	-0.362982	0.093609
PDSS2	-0.235427	-0.141889	0.0935378
HNRNPAB	-0.101844	-0.00835512	0.0934886
BCORL1	-0.0326252	0.0608142	0.0934394
NGLY1	-0.273361	-0.17993	0.0934317
CDC45	-2.42395	-2.33053	0.0934255
FDFT1	-0.258209	-0.164795	0.0934132
NR1I3	-0.122677	-0.0293069	0.0933702
PARP10	-0.145782	-0.0524119	0.0933698
OVOL2	-0.0985171	-0.005322	0.0931951
ALYREF	-1.34093	-1.24774	0.09319
ECHDC2	-0.26464	-0.171568	0.0930722
NCAPG	-1.6011	-1.50808	0.0930227
H2AC16	-1.13785	-1.04494	0.0929099
NRP2	-0.0766252	0.0161988	0.092824
RNF19A	-0.19062	-0.0978026	0.0928171
LAYN	-0.164604	-0.0717871	0.0928165
AKIRIN1	-0.468664	-0.37585	0.0928144
RAB19	-0.0656099	0.027136	0.0927459
CCR1	-0.0608221	0.0317775	0.0925996
BLOC1S5	-0.0345056	0.0580228	0.0925284
S100A6	-0.113494	-0.0210161	0.0924776
HSP90AA1	-0.392624	-0.300251	0.0923726
SLC25A1	-0.33341	-0.241048	0.0923611
ESPL1	-2.37261	-2.28035	0.092257
PSMG3	-1.224	-1.13178	0.0922205
TOMM20	-0.80309	-0.710879	0.092211
KDM1A	-0.29519	-0.202981	0.0922084
PDCD6IP	-0.516629	-0.424436	0.0921927
TGDS	0.00290732	0.0949929	0.0920856
YLPM1	-0.217075	-0.125014	0.0920608
NDUFB9	-0.766225	-0.674183	0.0920412
LETMD1	-0.159603	-0.0675867	0.0920167
ATAT1	-0.0631633	0.028791	0.0919543
EXOSC4	-1.49806	-1.40611	0.0919481
AGPS	-0.0783417	0.013572	0.0919136
REEP6	-0.094762	-0.00288268	0.0918793
FCGR2B	-0.277924	-0.186055	0.0918688
INTS3	-1.61195	-1.52028	0.0916729
CDC20	-2.3081	-2.21648	0.0916217
ATRX	-0.268483	-0.176903	0.0915799
SPINT1	-0.406669	-0.31512	0.0915491
EFNA3	-0.408858	-0.317332	0.0915252
STEEP1	-0.300288	-0.208812	0.0914758
DDIT3	-0.275499	-0.184058	0.0914404
MZT1	-1.23733	-1.1459	0.0914296
TBP	-0.918936	-0.827574	0.0913625
EMID1	-0.225904	-0.134619	0.0912846
FBXL17	-0.0987022	-0.00745996	0.0912423
BRAP	-0.415895	-0.324659	0.0912361
CYP2F1	-0.154026	-0.0628985	0.0911272
MED8	-1.05989	-0.968783	0.0911091
DOLK	-0.420103	-0.32901	0.0910923
MAOA	0.106011	0.196845	0.0908339
MRPS11	-0.700128	-0.609439	0.0906886
NR2C2	-0.220833	-0.130159	0.0906747
TRIM29	-0.0725525	0.0180729	0.0906254
C10orf88	-0.145829	-0.0552637	0.0905657
DYNLRB2	0.0813818	0.171842	0.09046
PHB2	-2.35518	-2.26481	0.0903727
CLDN6	-0.377303	-0.286956	0.090347
BOLA3	-0.392218	-0.302023	0.090195
ZNF609	-0.0652789	0.0247671	0.090046
NTF4	-0.165773	-0.0757923	0.0899802
TPM4	-0.291558	-0.201796	0.0897619
CREBZF	-0.131045	-0.0413928	0.0896522
PPP1R14B	-0.697283	-0.607649	0.0896339
NEUROD2	-0.252734	-0.16317	0.0895642
PTPN23	-1.18023	-1.09072	0.0895147
ANKRD37	-0.0170397	0.0724382	0.0894779
SHMT1	-0.230983	-0.141568	0.0894154
DCAF15	-0.337808	-0.24842	0.089388
ASCL4	-0.138184	-0.0488049	0.0893786
BTF3L4	-0.591662	-0.502284	0.0893774
DAB2IP	0.0469207	0.136258	0.0893374
SLC14A1	-0.00601508	0.0833043	0.0893194
GLRX5	-0.572836	-0.483655	0.0891809
COA6	-0.359608	-0.270435	0.0891726
PHLPP1	-0.0112109	0.0779035	0.0891144
STARD3NL	0.0143956	0.103506	0.0891105
BTG4	0.0830608	0.172015	0.0889545
DERL1	-0.270824	-0.18196	0.088864
ZNF17	-0.0927218	-0.00396243	0.0887594
MMS22L	-1.58061	-1.49194	0.0886667
C11orf71	-0.0757351	0.0127463	0.0884814
AQP10	-0.315142	-0.226673	0.0884681
KLHL11	-0.44536	-0.357028	0.0883325
RAB40C	-0.144003	-0.0557502	0.0882529
GATAD2B	-0.230998	-0.142794	0.0882045
PHLDB1	-0.0739637	0.0139632	0.0879269
FAM193A	-0.0874385	0.000480206	0.0879187
GRIPAP1	0.0530456	0.140918	0.0878724
CS	-0.454272	-0.366426	0.087846
TP53BP1	-0.104993	-0.0172222	0.0877705
CDK9	-1.66544	-1.57771	0.0877246
SSX1	-0.212062	-0.124403	0.087659
FRMD6	-0.0657455	0.0219034	0.0876489
TMEM69	-0.197993	-0.110376	0.0876172
ANKRD42	0.0315367	0.1191	0.0875636
ZMYND19	-0.035612	0.051933	0.087545
CAMK2B	-0.141017	-0.0535731	0.0874442
KLHL6	-0.0364184	0.0508588	0.0872772
LAMTOR2	-0.685304	-0.598065	0.0872394
PIK3IP1	-0.119609	-0.0324204	0.087189
MYL6	-0.236787	-0.149604	0.087183
CD5L	-0.186098	-0.0989197	0.0871782
PEX11B	-0.376011	-0.288917	0.0870936
OSBPL11	-0.0973239	-0.0103213	0.0870026
WDR59	-0.317884	-0.230898	0.0869861
MICALL1	-0.264242	-0.177268	0.0869741
TRIM61	-0.451752	-0.364782	0.0869706
CRIP1	-0.0354778	0.0514033	0.0868811
METTL3	-0.651369	-0.564489	0.0868796
CORO1A	-0.170051	-0.0832	0.0868512
CCL13	-0.190331	-0.103497	0.0868344
CTIF	-0.0332521	0.0535739	0.0868261
ARHGEF5	-0.454199	-0.367385	0.086813
NF1	-0.0240547	0.0627462	0.086801
STAT2	-0.179907	-0.0932523	0.0866543
UAP1	-0.413677	-0.327086	0.0865911
GFOD2	-0.297348	-0.210786	0.0865619
PLK4	-1.17477	-1.08841	0.0863611
ANKRD12	0.011359	0.0976366	0.0862776
ACTL6A	-1.62551	-1.53926	0.0862532
AMHR2	-0.0990472	-0.012812	0.0862352
FBXO42	-0.23085	-0.144629	0.0862204
SNRPA	-0.397153	-0.311038	0.0861148
SLC50A1	-0.0908303	-0.00482412	0.0860062
RPS12	-2.41803	-2.33205	0.0859872
BAMBI	-0.176404	-0.0905001	0.0859043
PRPF39	-0.526023	-0.440253	0.0857696
ATP6V0A1	-0.284043	-0.198442	0.0856014
NT5E	-0.141163	-0.0555924	0.0855704
EID2B	-0.117072	-0.0315171	0.085555
POLB	0.0609186	0.146459	0.0855406
HGSNAT	-0.0491653	0.0363044	0.0854698
TXNDC11	-0.128013	-0.0426431	0.0853697
GPIHBP1	-0.276034	-0.190693	0.0853412
COA3	-0.421345	-0.336049	0.085296
CD244	-0.061068	0.024201	0.0852691
GMNN	-0.528259	-0.443003	0.0852556
MYD88	-0.115987	-0.0307396	0.0852477
ANKRD55	-0.0169839	0.0682515	0.0852353
NCDN	-0.331517	-0.246335	0.0851813
LUC7L2	-0.377257	-0.292134	0.0851235
WDR81	-0.0958442	-0.0107572	0.0850871
NSFL1C	-0.216652	-0.131577	0.0850745
THBS3	-0.290105	-0.205123	0.0849825
ISCU	-2.22474	-2.13977	0.0849657
ARPP19	-0.434121	-0.349172	0.0849487
UBA5	-0.57568	-0.490869	0.084811
GRXCR2	-0.156363	-0.0717312	0.0846318
TCP10L	-0.0344751	0.0501521	0.0846272
CYP46A1	-0.0173651	0.0671934	0.0845585
SLC35A1	-0.14329	-0.058792	0.0844981
NDUFS2	-0.564859	-0.480665	0.0841934
PPM1M	-0.219231	-0.135063	0.0841676
SLC25A11	-0.0396635	0.0444133	0.0840768
BNIPL	-0.224411	-0.140353	0.0840587
RAB7A	-0.516995	-0.432968	0.0840267
IDE	-0.134422	-0.0504598	0.0839624
SLFN11	-0.0991502	-0.0152088	0.0839414
TSC22D2	-0.521752	-0.437833	0.083919
MAPKAP1	-0.358166	-0.274349	0.0838173
ZMYND15	-0.103727	-0.0199465	0.0837809
KDELR1	-0.137842	-0.0541158	0.083726
RDH8	-0.127835	-0.0441318	0.0837033
TMEM208	-0.185704	-0.102017	0.0836874
CHI3L1	-0.0224038	0.0612153	0.0836191
CMTR2	-0.177699	-0.0941071	0.0835915
LUC7L3	-1.91432	-1.83079	0.0835333
TLCD3B	-0.187023	-0.103643	0.08338
CNOT3	-1.70447	-1.62123	0.0832408
TNK2	-0.0181331	0.0651023	0.0832355
PPA2	-0.418687	-0.335546	0.0831404
CASS4	-0.13027	-0.047151	0.0831187
UQCRB	-0.498745	-0.415663	0.0830816
PELP1	-1.06304	-0.98	0.0830382
CD1D	-0.150652	-0.0676201	0.0830315
CPNE7	-0.304583	-0.221641	0.0829421
MYO5B	-0.0240576	0.0588492	0.0829069
FCRL5	-0.0619568	0.0208654	0.0828222
DHX40	-0.328867	-0.246045	0.0828219
SLC3A2	-0.52394	-0.441139	0.0828016
DEDD	-0.118829	-0.0360777	0.0827517
MAP3K6	-0.199644	-0.117031	0.0826136
SPACA7	-0.130624	-0.0480548	0.0825691
PRSS1	-0.0376558	0.0449005	0.0825562
CDKN1A	0.145446	0.227944	0.0824981
B3GNT8	-0.0166037	0.0658752	0.0824789
HS6ST3	-0.0163954	0.0660188	0.0824142
RMI2	-0.463572	-0.381164	0.0824077
H1	-0.493166	-0.410759	0.082407
SREK1	-0.349342	-0.26701	0.0823317
TAP1	-0.201957	-0.119742	0.0822149
H1	-0.132053	-0.0498629	0.0821905
COX8C	-0.0689169	0.0132693	0.0821862
STARD3	-0.264953	-0.182774	0.082179
MMP26	0.109941	0.192052	0.0821109
PSMC6	-2.01682	-1.93482	0.0820004
PLIN2	-0.0827815	-0.000877398	0.0819042
FAM161B	-0.0752341	0.00661703	0.0818512
FAM104B	-0.368527	-0.286734	0.0817933
H3C4	-0.448864	-0.36708	0.081784
RTN4IP1	-0.358995	-0.277213	0.0817814
USP32	-0.349793	-0.26808	0.0817134
ALKBH7	-0.184626	-0.102986	0.0816399
TMEM30A	-0.219266	-0.137676	0.0815903
CRH	-0.113574	-0.0321032	0.0814708
UBXN7	-0.0799918	0.00147712	0.081469
CRYAB	-0.104152	-0.0226939	0.0814585
SIAH2	-0.0574979	0.0238926	0.0813904
CORO2A	-0.0668971	0.0143991	0.0812961
ARHGEF17	-0.14483	-0.0635991	0.0812312
FAM110D	-0.245827	-0.164605	0.0812219
ELAC1	-0.0199259	0.061274	0.0811998
CYP24A1	-0.117411	-0.0362883	0.0811227
BCKDHA	-0.149224	-0.0681141	0.0811094
RAD51	-1.48063	-1.39954	0.0810814
PTGR3	-0.060072	0.0209975	0.0810695
FOXO1	-0.174877	-0.0939896	0.0808878
ZCRB1	-0.674358	-0.593483	0.0808741
RPL13	-2.70819	-2.62733	0.0808673
VENTX	-0.0928524	-0.0119934	0.080859
ONECUT1	-0.00543299	0.0754229	0.0808559
HADHA	-0.294747	-0.213894	0.0808529
FAM177A1	-0.185316	-0.104663	0.0806536
GRAP2	-0.0751216	0.00549366	0.0806152
ANXA11	-0.0266286	0.0539245	0.0805531
KIF1B	-0.142215	-0.0616643	0.0805506
LIPT2	-0.186066	-0.105572	0.080494
CRYZL1	-0.0806966	-0.000237187	0.0804594
CRYBA1	-0.237624	-0.157286	0.0803379
SELENOS	-0.0954732	-0.0151675	0.0803057
NDUFC1	-0.380333	-0.300137	0.0801968
MAP7D1	-0.179432	-0.099273	0.0801591
RRAGA	-0.531368	-0.45127	0.0800981
ATP6V1E1	-1.50931	-1.42927	0.0800378
IFITM5	-0.132597	-0.0526034	0.0799941
PITHD1	-0.031264	0.048692	0.079956
TUFT1	-0.211622	-0.131699	0.079923
ATF6B	-0.227216	-0.147334	0.0798815
FOXK2	-0.0351314	0.0447435	0.0798749
MED14	-1.44353	-1.3637	0.0798276
YWHAH	0.000762879	0.0805428	0.0797799
MRPL57	-0.863738	-0.78396	0.0797784
UBA3	-0.714357	-0.634583	0.0797742
VPS45	-0.465105	-0.385344	0.0797608
AP1B1	-0.241673	-0.161914	0.0797587
ACTN4	-0.0635231	0.0162073	0.0797304
PSG8	-0.160171	-0.0804643	0.0797071
KLF7	-0.242487	-0.162808	0.0796787
ABCB10	-0.091253	-0.0115797	0.0796733
TNFRSF10B	0.120879	0.200471	0.0795925
TGFB1	-0.108662	-0.0292655	0.0793968
GPA33	-0.12224	-0.0429065	0.0793337
TMIGD2	-0.0955085	-0.0162749	0.0792335
COPRS	-0.282415	-0.203187	0.0792282
ZNF222	-0.0919512	-0.0127441	0.0792072
TPM3	-0.20359	-0.124395	0.0791954
LRRC25	-0.0209095	0.0582215	0.079131
NDUFAF2	-0.28401	-0.204919	0.0790903
TDGF1	-0.592814	-0.513742	0.0790718
TIAL1	-0.114447	-0.0354047	0.0790428
TBCK	0.0699494	0.148986	0.079037
SCFD2	-0.182172	-0.103156	0.0790158
SYS1	-1.2652	-1.18621	0.0789931
PSORS1C2	0.0416916	0.120634	0.0789424
KRTAP13	-0.0902726	-0.011344	0.0789286
SLC25A38	-0.538768	-0.459851	0.0789165
LMO4	-0.0486854	0.0302012	0.0788866
SLC31A1	-0.383438	-0.304629	0.0788089
SLC30A1	0.00183909	0.080486	0.0786469
EPHA10	-0.280448	-0.202	0.0784474
PGAM2	-0.102234	-0.0237946	0.0784391
ANKDD1B	0.0629616	0.141289	0.0783274
COMMD6	-0.298759	-0.220455	0.0783043
HJURP	-1.00018	-0.921915	0.0782663
ECM1	-0.236077	-0.157817	0.0782596
HP1BP3	0.0192707	0.0974917	0.078221
TWF1	-0.477377	-0.399163	0.0782145
GOSR1	-0.301514	-0.223321	0.0781929
KIRREL1	0.0751597	0.15332	0.0781605
ASB9	0.0247724	0.102911	0.0781387
MED27	-1.03283	-0.954748	0.0780776
SNN	-0.0899685	-0.0120278	0.0779407
EDEM2	-0.168393	-0.0904797	0.0779134
RC3H1	-0.233288	-0.1554	0.0778879
EIF4E2	-0.33774	-0.259867	0.0778734
STRIP1	-0.457782	-0.380022	0.0777602
PRDM15	-0.0356154	0.0420794	0.0776948
DIXDC1	-0.106277	-0.0287122	0.0775645
EIF4B	-0.794691	-0.717323	0.0773679
SMPD1	-0.142502	-0.0652105	0.0772915
H2AC17	-1.23253	-1.15526	0.0772685
SLC39A9	-0.104421	-0.0271986	0.0772225
BCS1L	-0.46904	-0.391905	0.0771346
EYA2	-0.00505541	0.0720618	0.0771172
ASB3	-0.132662	-0.055578	0.0770844
YTHDF2	-0.407877	-0.33082	0.077057
HSPA6	-0.272438	-0.195393	0.0770449
TMEM64	-0.099735	-0.0227154	0.0770196
AIF1	-0.223615	-0.146699	0.0769163
G6PD	-0.188565	-0.111685	0.0768795
CA5A	-0.527465	-0.450654	0.0768111
IGFLR1	-0.246978	-0.170363	0.0766146
RAB21	-0.200012	-0.123472	0.0765404
RUSC1	-0.181791	-0.105304	0.0764875
DPPA2	-0.258313	-0.181925	0.0763884
PLAT	-0.00624325	0.0701448	0.0763881
MAN1C1	-0.148096	-0.0717604	0.076336
MIX23	-0.498255	-0.421991	0.0762641
SFMBT2	-0.0741617	0.00197325	0.076135
STYX	-0.0731832	0.00276241	0.0759456
RUNDC1	-0.144561	-0.0688038	0.0757572
CERS2	-0.434522	-0.358766	0.0757558
S100A16	-0.112116	-0.0363724	0.0757433
CCDC125	-0.0799956	-0.00431111	0.0756845
SHC2	-0.0663692	0.00927847	0.0756477
RGP1	-0.509122	-0.433579	0.0755422
KRT32	-0.148964	-0.0734796	0.0754843
RNF139	-0.175921	-0.100438	0.0754838
ANP32E	-0.334848	-0.259391	0.0754574
HNRNPR	-0.390118	-0.314703	0.0754157
IGSF9	-0.114924	-0.0395926	0.0753309
POMK	-0.00667912	0.068648	0.0753271
GLYATL2	0.0300866	0.105366	0.0752789
RANBP6	-0.013953	0.0612519	0.0752049
CSTF2	-0.248256	-0.173127	0.0751295
PAK6	-0.120377	-0.0452622	0.0751145
ZDHHC16	-0.0872657	-0.0121776	0.0750881
OTOP1	-0.580352	-0.505353	0.0749984
COL14A1	-0.106875	-0.0319038	0.0749716
MACIR	-0.208326	-0.133415	0.0749105
ACTR8	-0.597847	-0.523054	0.0747921
MYT1L	-0.167972	-0.0931936	0.0747787
SHISAL2A	-0.204056	-0.129329	0.0747275
PUS10	-0.110856	-0.0361339	0.074722
BTN2A2	-0.00308896	0.0716247	0.0747137
CEP350	-0.288301	-0.213613	0.074688
TTC23	0.0581979	0.132787	0.0745895
IWS1	-0.230491	-0.155912	0.0745788
CDR2	-0.0587113	0.0158405	0.0745518
CCDC22	-0.281361	-0.206812	0.0745486
RAB25	-0.215589	-0.141065	0.0745242
HOATZ	-0.0825404	-0.00802086	0.0745196
ZNF768	-0.145435	-0.0709579	0.0744767
CCR10	-0.148407	-0.0739312	0.0744757
PPP3CA	-0.0344661	0.0399687	0.0744348
SDC1	-0.233662	-0.159331	0.074331
USP10	-0.78765	-0.713319	0.0743307
SLC5A6	-0.0563872	0.017921	0.0743081
PAPOLA	-0.130234	-0.0559295	0.0743049
ATP8B3	-0.134393	-0.0601808	0.0742125
TOMM7	-0.123405	-0.0492215	0.0741837
MAGEH1	-0.152233	-0.0781234	0.0741095
MFSD5	-0.0542647	0.0198288	0.0740935
UGDH	-0.242795	-0.168722	0.0740733
SF3B1	-1.45513	-1.38108	0.0740484
ITGA8	-0.136593	-0.0625534	0.0740396
ZC3H12C	-0.0862811	-0.0122468	0.0740344
PINK1	-0.0315784	0.0423915	0.0739699
IFIT3	-0.0175004	0.0564067	0.0739071
MACROH2A1	-0.286962	-0.213067	0.073895
SLC15A2	-0.0620546	0.0118283	0.0738829
THOC2	-2.09943	-2.02565	0.0737759
ZSCAN2	-0.037408	0.0363276	0.0737355
SMC1A	-1.43354	-1.35987	0.0736701
MC3R	0.0786694	0.152238	0.0735691
KRTCAP2	-0.357316	-0.283804	0.0735119
SPRR2G	-0.592452	-0.518969	0.0734828
PA2G4	-0.657161	-0.583729	0.0734319
FBXO32	0.112829	0.186255	0.0734255
KRTAP10	-0.120288	-0.0468656	0.0734221
ACP2	-0.0658305	0.00755494	0.0733854
IK	-1.66237	-1.58901	0.0733632
BCL2L12	-0.273118	-0.199788	0.0733302
PNMT	-0.225283	-0.151978	0.0733051
ISG20	-0.0403628	0.0329399	0.0733027
DENND3	-0.0295027	0.0437827	0.0732854
KMT2E	-0.196585	-0.123334	0.0732508
TESK1	-0.18841	-0.115184	0.0732265
POLI	0.105622	0.178831	0.0732096
TRMT1L	-0.157885	-0.0847316	0.0731534
R3HDM1	-0.076675	-0.00362802	0.073047
MAP3K10	-0.130071	-0.0570674	0.0730034
ZNF862	-0.0857524	-0.0127496	0.0730028
TXNDC5	0.101252	0.174248	0.0729962
ZW10	-0.268568	-0.195592	0.0729762
NECAP2	-0.0915282	-0.0185676	0.0729605
DENND4A	-0.174788	-0.101855	0.0729325
ASPHD1	-0.0984622	-0.0255498	0.0729124
HGH1	-0.0779031	-0.00502873	0.0728744
AGFG1	-0.0387303	0.0341084	0.0728387
GALNT5	-0.0783841	-0.00557428	0.0728098
SDF2	-0.271337	-0.198546	0.0727903
MKLN1	-0.170057	-0.0972686	0.0727879
HLA	-0.280559	-0.207792	0.0727679
SPATA5L1	-1.19326	-1.12052	0.0727402
PDIK1L	-0.0821544	-0.00943812	0.0727163
HECW2	-0.032876	0.0397852	0.0726613
FAM43B	-0.0240016	0.0486197	0.0726214
LITAF	-0.00192471	0.0705031	0.0724278
TCL1B	-0.0896219	-0.0172311	0.0723908
MCM9	-0.122528	-0.050179	0.0723489
CDH24	-0.301726	-0.229438	0.0722879
DERL3	-0.184038	-0.11183	0.0722086
CSTB	-0.0469997	0.0251908	0.0721905
EGLN2	-0.246571	-0.174402	0.0721689
TAPBP	-0.22742	-0.155251	0.0721685
UBE2E1	-0.0572978	0.0148251	0.0721229
IGFBP4	-0.16832	-0.0962281	0.0720924
SAP30	0.0189594	0.0909854	0.072026
RPL10	-0.83518	-0.763182	0.0719975
C19orf25	-0.355614	-0.283631	0.0719836
LRPAP1	-0.0680319	0.0038766	0.0719085
SYT11	-0.254934	-0.183049	0.0718851
KLRB1	0.0361099	0.107895	0.0717847
NBEAL2	-0.0407981	0.0309327	0.0717308
SLC52A2	-0.224787	-0.153057	0.0717302
PRAG1	0.0804142	0.152121	0.0717071
PARL	-0.440043	-0.368382	0.0716612
SRXN1	-0.100885	-0.0292852	0.0716
MRPS26	-0.47763	-0.406049	0.0715805
MEF2A	-0.0598141	0.0117464	0.0715605
ATP2A2	-1.854	-1.78245	0.0715475
CHADL	-0.0487121	0.0228119	0.071524
SPAST	-0.0636665	0.00781055	0.0714771
TMEM107	-0.0856113	-0.0141566	0.0714547
FNTB	-0.877544	-0.806108	0.0714366
H2BC15	-2.20267	-2.13123	0.071434
SETD1A	-1.05167	-0.980272	0.0713957
SHB	-0.171828	-0.100524	0.0713043
PGF	-0.0960661	-0.0247813	0.0712849
C1orf43	-0.301586	-0.230322	0.0712641
SUDS3	-0.647693	-0.576449	0.0712435
CACYBP	-0.42935	-0.358134	0.0712168
CYP4F11	-0.293462	-0.222247	0.0712156
DYRK1B	-0.161586	-0.090377	0.0712087
PAEP	-0.222569	-0.151396	0.0711725
SCNN1D	-0.156212	-0.0850408	0.0711716
GPATCH11	0.0464752	0.117505	0.0710298
C8orf76	-0.105764	-0.0347573	0.0710065
CEACAM16	-0.100417	-0.0294245	0.0709928
MFSD14B	-0.147067	-0.076091	0.0709764
SERBP1	-0.609531	-0.538572	0.0709586
SLCO2B1	0.0391672	0.11012	0.0709532
TAF1	-0.809521	-0.738626	0.0708951
ACAD9	-0.344402	-0.27359	0.0708128
HTRA2	-0.150188	-0.0794106	0.0707779
MEI1	0.0205157	0.0912907	0.070775
EPHB2	-0.00595418	0.0647884	0.0707426
CNOT1	-0.79543	-0.724717	0.0707131
RAC2	-0.165644	-0.0949374	0.0707063
SINHCAF	-0.559595	-0.488897	0.0706982
SCARA3	0.0402468	0.110918	0.0706709
FGD6	-0.137508	-0.0668516	0.0706562
NCOA3	-0.149521	-0.07887	0.0706514
CHEK2	0.168007	0.238624	0.0706166
HTR3C	-0.0284031	0.0422098	0.0706128
PRR30	-0.263895	-0.193317	0.0705772
UBASH3B	-4.97916e-05	0.0704956	0.0705453
GFI1	-0.0653312	0.0051532	0.0704844
NOTCH2	-0.113467	-0.042989	0.0704779
SEPSECS	-0.503716	-0.433242	0.0704732
USHBP1	-0.0973915	-0.0269397	0.0704517
CLN3	-0.00798179	0.0624604	0.0704422
LAP3	-0.165103	-0.094675	0.0704275
SLC6A16	-0.0163205	0.0540945	0.070415
GCK	-0.0435388	0.0268618	0.0704006
EIF5AL1	-0.421092	-0.350699	0.0703933
ATP1A3	-0.145975	-0.0756026	0.0703725
TTI1	-0.918316	-0.847978	0.0703381
EDEM1	-0.0248581	0.0454518	0.0703099
RSF1	-0.0882331	-0.017925	0.0703081
ING2	-0.0650705	0.00519098	0.0702615
TUBB2B	-0.290413	-0.220154	0.0702583
GIMAP8	-0.0745257	-0.0042961	0.0702296
RAB5IF	-0.199495	-0.129295	0.0701992
TEF	-0.255731	-0.185535	0.070196
UPK2	-0.112824	-0.0426516	0.0701722
ZNF683	-0.202889	-0.132726	0.0701634
RENBP	-0.0922774	-0.0221275	0.0701499
NCBP3	-0.0920693	-0.0219303	0.070139
SMAP1	0.0285448	0.0986672	0.0701225
ALDH18A1	-0.0963529	-0.0262872	0.0700657
CCDC117	-0.161611	-0.0915494	0.0700619
MAP4K4	-0.103698	-0.0336382	0.0700601
CNOT11	-0.310058	-0.240012	0.0700457
ABAT	-0.0757882	-0.00575307	0.0700351
RAMP2	-0.0620583	0.00796033	0.0700187
THAP4	0.0130401	0.0829686	0.0699286
CGN	-0.174581	-0.104685	0.0698956
CDIN1	-0.387802	-0.317925	0.0698771
CMAS	-0.066951	0.00291955	0.0698705
SCAF4	-0.223452	-0.153589	0.0698632
SPHK2	-0.183912	-0.114073	0.0698396
PLCB3	-0.232468	-0.162709	0.0697585
IFT27	-0.0153103	0.0544233	0.0697336
WDR45	-0.265847	-0.196132	0.0697154
RGMA	-0.0662975	0.00341012	0.0697076
TAGLN	-0.067286	0.00237273	0.0696588
SNAPIN	-0.578863	-0.509257	0.0696058
CEP164	0.0592861	0.128884	0.0695982
EVL	-0.0124943	0.0570665	0.0695607
NEU2	-0.189944	-0.120443	0.0695001
MOGAT2	-0.0762683	-0.00683419	0.0694341
APOC1	-0.244553	-0.175122	0.0694305
PNMA3	0.0456619	0.115081	0.0694192
TNXB	-0.208592	-0.139178	0.0694144
GRHL3	0.0260327	0.0954313	0.0693986
PPP4R4	-0.0308337	0.0385526	0.0693863
AP4S1	-0.135846	-0.0664902	0.0693559
MAGOHB	-0.0309267	0.0383896	0.0693164
HLA	-0.11287	-0.0435557	0.069314
YWHAG	-0.356411	-0.287179	0.0692317
HELT	-0.0142191	0.0549921	0.0692112
IGF2BP3	-0.123296	-0.0541273	0.0691682
PSG6	-0.15348	-0.0843183	0.0691621
SNRNP200	-2.53213	-2.46298	0.0691412
KIF13B	-0.074379	-0.00525365	0.0691253
CD276	-0.42056	-0.351438	0.0691223
SAV1	0.0176833	0.0867336	0.0690503
PBX2	-0.37036	-0.301344	0.0690156
FADS3	-0.124313	-0.0553691	0.0689443
IGLL1	-0.252631	-0.183818	0.0688128
C12orf57	-0.112336	-0.0435376	0.068798
CFAP65	-0.00985037	0.0588611	0.0687115
MRPS34	-0.696291	-0.627581	0.06871
HPRT1	-0.0345945	0.0341001	0.0686946
COX7A2L	-0.0488914	0.0197954	0.0686868
STIP1	-0.31656	-0.247887	0.0686729
GAN	-0.098374	-0.0297043	0.0686698
TM9SF3	-0.115117	-0.0464487	0.0686687
TTC14	-0.223214	-0.154609	0.068605
RAB39B	0.0321624	0.100706	0.0685437
RP9	-0.167646	-0.0991514	0.0684948
SLC25A5	-0.533924	-0.465471	0.0684529
PNRC1	-0.0885954	-0.0201463	0.0684491
PICALM	-0.126553	-0.0581061	0.0684472
WASHC4	-0.106446	-0.0380004	0.0684454
MASP2	-0.0735301	-0.00510365	0.0684264
HAUS7	-1.31832	-1.2499	0.0684147
PLIN3	-0.0953522	-0.0269736	0.0683786
EVPLL	-0.0708696	-0.00250132	0.0683683
AP3S1	-0.338841	-0.270523	0.068318
RETN	-0.0785473	-0.0102891	0.0682581
PLA2G2F	0.0235073	0.0917012	0.0681938
ATP5ME	-0.499138	-0.430949	0.0681892
LRWD1	-0.157338	-0.08916	0.0681775
NAA20	-0.78771	-0.719562	0.068148
DSTN	-0.363547	-0.295401	0.0681458
SLC6A8	-0.278745	-0.210662	0.0680828
CLSTN1	-0.0877387	-0.0197297	0.068009
HEXIM2	-0.154423	-0.0864148	0.0680079
FNTA	-1.04817	-0.980196	0.067972
UPF1	-1.43027	-1.36233	0.0679425
GRB10	0.016296	0.0842226	0.0679265
MRPL17	-0.506395	-0.438502	0.0678927
ACTMAP	0.0865465	0.154432	0.0678851
LACTB2	-0.0517411	0.0161027	0.0678437
SWSAP1	-0.172716	-0.104946	0.0677702
SRCAP	-1.0855	-1.01775	0.0677546
CFAP45	-0.115352	-0.0476542	0.0676974
MPZL3	0.00859417	0.07627	0.0676759
IFNAR1	0.0822622	0.149914	0.0676517
PLEKHA3	-0.074994	-0.00734561	0.0676484
CCBE1	-0.00838077	0.0592077	0.0675885
PSMD8	-0.858453	-0.790873	0.06758
TRIP6	-0.260122	-0.192567	0.0675549
ECM2	-0.0162734	0.0512204	0.0674939
SNAPC3	-1.26244	-1.19497	0.0674727
CASQ1	-0.0539514	0.0134968	0.0674482
AHCYL1	-0.489716	-0.422298	0.0674186
KLHL2	-0.143098	-0.0757147	0.067383
TRIM46	-0.354635	-0.287294	0.0673413
RFFL	-0.161913	-0.0947664	0.0671471
LIFR	-0.0611492	0.00595209	0.0671013
ZCCHC3	0.0125525	0.0796344	0.0670819
CHAC1	-0.0856985	-0.0186179	0.0670806
IFT80	-0.129177	-0.0621022	0.0670751
PDXDC1	-0.174588	-0.107565	0.0670226
CEACAM6	-0.327952	-0.260939	0.0670133
DENND5B	-0.0970715	-0.0300741	0.0669974
AFF4	-0.128884	-0.061892	0.0669925
UCK1	-0.189741	-0.122767	0.0669743
MFRP	-0.0889561	-0.0220015	0.0669546
ZNF256	0.0387931	0.105722	0.0669287
COX15	-0.275629	-0.208712	0.0669164
KHDRBS3	-0.0242607	0.0426266	0.0668874
PRSS48	0.117675	0.184539	0.0668637
MCUB	0.0955033	0.162286	0.0667829
C1orf56	-0.304252	-0.237484	0.0667678
CARD16	-0.0504385	0.016318	0.0667565
FBXO7	-0.162082	-0.0953664	0.0667161
HLA	-0.126102	-0.0594101	0.0666918
POLR2C	-2.50898	-2.44232	0.0666645
NUFIP2	-0.209588	-0.142947	0.0666412
CSRNP1	-0.0653635	0.00120175	0.0665652
DNMBP	-0.0390465	0.0274579	0.0665044
HIF1AN	-0.236423	-0.169961	0.0664614
SFXN1	-0.0222378	0.0441993	0.0664371
CYB5RL	-0.0299591	0.0364682	0.0664273
MTA1	-0.0804468	-0.0140241	0.0664227
RHEBL1	-0.193328	-0.126921	0.0664072
FAU	-2.86309	-2.7967	0.0663919
TCHHL1	-0.175514	-0.109126	0.0663873
PHKA1	-0.0820695	-0.0157061	0.0663634
PMPCB	-1.75524	-1.68893	0.0663152
SLC22A12	-0.0722738	-0.00601671	0.0662571
SLC35G6	0.0597123	0.12593	0.0662177
USP4	-0.178583	-0.112385	0.0661981
PFKFB1	-0.104701	-0.0385199	0.0661813
DHX30	-0.422319	-0.356226	0.0660931
TNFAIP8	-0.0331189	0.0329702	0.0660891
KHDC1L	-0.139374	-0.0733419	0.0660318
ZNF559	-0.18702	-0.121005	0.0660149
DOCK8	-0.0411397	0.0248441	0.0659838
FOXN4	-0.201735	-0.135826	0.065909
NDUFB6	-0.432391	-0.366539	0.0658516
SEC13	-1.63947	-1.57366	0.0658109
GNG10	-0.17174	-0.105943	0.0657975
NKIRAS2	-0.0438923	0.021836	0.0657283
CES1	-0.0740963	-0.00838242	0.0657139
MIEF2	-0.147341	-0.0816465	0.0656945
EGFL8	-0.020471	0.0452085	0.0656795
SLC22A7	-0.209423	-0.143746	0.0656771
TMEM91	-0.00724835	0.0584192	0.0656675
SERHL2	-0.185059	-0.11942	0.0656395
FCRL1	-0.0495786	0.0160536	0.0656323
PRAF2	-0.0794287	-0.0138384	0.0655903
INPP5B	-0.287618	-0.222103	0.065515
H2AC7	-0.534164	-0.46867	0.0654938
ACBD4	-0.174241	-0.108813	0.0654278
FUT9	0.091938	0.157308	0.0653699
ACSM1	-0.0314773	0.0338616	0.0653389
MRPS36	-0.344707	-0.279386	0.0653207
TBCC	-0.786069	-0.720772	0.0652968
STYXL2	-0.0378547	0.027421	0.0652757
ADRB2	-0.039907	0.0253497	0.0652566
ATG4B	-0.0121	0.0531375	0.0652375
MTCH2	-0.224909	-0.159722	0.0651875
INHBC	-0.170991	-0.105867	0.0651244
PRRT2	-0.0924978	-0.0274065	0.0650913
CYP4F3	-0.00514723	0.0599315	0.0650787
LDLR	-0.283556	-0.218506	0.0650507
CSF1	-0.187323	-0.122295	0.0650278
SLC20A2	-0.0922983	-0.0272819	0.0650164
ADAMTSL4	-0.3094	-0.244391	0.0650096
FCN2	-0.0213076	0.0436649	0.0649724
ZMAT5	-0.950135	-0.8853	0.0648349
ADAMTS4	-0.206444	-0.141613	0.0648304
CNN2	-0.415817	-0.351046	0.0647714
TOR1AIP2	-0.357429	-0.292734	0.0646946
HBEGF	-0.129226	-0.0645832	0.0646432
STK40	-0.273816	-0.20919	0.0646252
COMMD3	-0.266228	-0.201604	0.064624
SEC31A	-0.11063	-0.0460507	0.0645789
DENND6A	0.0880234	0.152595	0.0645713
ZNFX1	-0.147581	-0.083041	0.0645396
ALG8	-0.340235	-0.275717	0.0645184
AVL9	0.0678546	0.132325	0.0644701
APMAP	-0.0286135	0.0358441	0.0644576
SDHAF1	-0.372848	-0.308406	0.0644415
GATD3	-0.130548	-0.0661114	0.064437
PRXL2A	-0.186052	-0.121685	0.0643669
AMD1	-0.582534	-0.518181	0.0643531
MT1F	-0.30292	-0.238585	0.0643343
NELFCD	-0.684448	-0.620119	0.0643282
FDXR	-0.711086	-0.646802	0.0642844
MTMR9	-0.0896504	-0.025403	0.0642474
CHST15	0.101405	0.165609	0.0642037
C1orf21	-0.0103167	0.0538738	0.0641905
PISD	-0.830116	-0.765946	0.0641701
C1orf54	-0.14795	-0.083784	0.0641656
SERPINA5	0.0169993	0.0810666	0.0640673
GPATCH8	-0.24097	-0.176903	0.0640662
C17orf58	-0.510546	-0.44651	0.0640367
G3BP2	-0.171588	-0.107632	0.0639552
ELOVL2	-0.0843466	-0.0203919	0.0639547
HAMP	-0.530898	-0.466967	0.0639308
CCDC61	-0.157979	-0.0940727	0.0639063
MYO7A	-0.213804	-0.149931	0.0638727
SET	-0.168289	-0.104419	0.0638699
SH3BP5	0.0460087	0.109875	0.0638667
TMEM254	-0.069821	-0.0060158	0.0638052
RER1	-0.269752	-0.205963	0.063789
CCDC30	-0.114973	-0.0511916	0.0637817
LAPTM4B	-0.0508741	0.0128592	0.0637333
COA4	-0.150966	-0.0872403	0.0637254
PAFAH1B2	0.0259079	0.0896249	0.063717
MYL3	-0.0738814	-0.0101778	0.0637036
CHID1	-0.157667	-0.0939956	0.0636716
LAPTM4A	0.0670562	0.130694	0.0636381
RGS2	-0.0700369	-0.0064838	0.0635531
ZBTB7B	-0.197399	-0.133922	0.0634768
CTSK	-0.250989	-0.187514	0.063475
PGLS	-0.282477	-0.219015	0.0634628
RGS22	-0.127009	-0.0636431	0.0633663
ENPP6	0.101826	0.165186	0.0633606
E2F8	0.0140012	0.0773586	0.0633574
GPS1	-1.17806	-1.11471	0.0633429
CCL5	-0.17334	-0.110033	0.0633075
RFWD3	-0.394355	-0.331068	0.0632875
NPM3	-0.278404	-0.215118	0.0632858
NUP54	-0.749867	-0.686605	0.0632614
METTL23	-0.289462	-0.226211	0.0632507
DFFB	-0.0896659	-0.026447	0.0632189
JPH1	-0.155723	-0.0925208	0.0632026
IRF2BPL	-0.0809755	-0.0178263	0.0631492
SUFU	-0.0432668	0.0198693	0.0631361
BNC1	-0.178684	-0.115559	0.0631242
SAFB2	-0.17308	-0.11009	0.0629907
FBXL14	0.0121284	0.0750767	0.0629483
KDM4C	-0.049455	0.0134174	0.0628724
DRICH1	-0.169863	-0.107011	0.0628529
SHF	-0.127708	-0.0648924	0.0628153
C2CD2L	-0.0296616	0.0331175	0.0627791
DMAP1	-1.25684	-1.19409	0.0627522
B4GALT3	-0.314511	-0.251782	0.062729
CHCHD2	-0.587496	-0.524769	0.0627278
PRKCD	-0.124519	-0.0617987	0.0627207
CLK3	-0.085776	-0.0230559	0.06272
ZNF215	0.146717	0.209426	0.0627093
ARMC10	-0.398097	-0.335408	0.0626888
SOX30	-0.285928	-0.223243	0.0626849
CA6	-0.0882452	-0.0255731	0.0626721
ROMO1	-1.06683	-1.00421	0.0626239
CCL7	-0.248578	-0.185996	0.0625818
S100A2	-0.00910765	0.0534735	0.0625811
MRO	-0.0969047	-0.0343625	0.0625422
CLPB	-0.280416	-0.217884	0.0625324
EARS2	-0.428023	-0.365522	0.0625012
INPP1	-0.0291446	0.0333518	0.0624964
APOC2	-0.175224	-0.11273	0.0624943
ZSWIM1	-0.0419395	0.0205274	0.0624669
EIF3K	-0.379054	-0.316613	0.0624412
PYGO2	-0.126964	-0.0645494	0.0624151
HCRTR1	-0.186626	-0.124218	0.0624083
DHDDS	-2.46583	-2.40342	0.0624033
ARHGAP31	-0.124874	-0.0624817	0.0623926
FHIP1A	0.00223175	0.0646027	0.062371
DPY19L4	-0.196566	-0.134215	0.0623514
STAG1	-0.191989	-0.129681	0.0623085
DRAM1	-0.0849871	-0.0227678	0.0622193
SUMO1	-0.246552	-0.184369	0.0621833
STIM1	-0.0625591	-0.000409984	0.0621491
CD82	-0.0410333	0.0211143	0.0621476
LARGE2	-0.136196	-0.0741	0.0620956
C12orf4	0.0107508	0.0728244	0.0620736
TEX2	-0.0658488	-0.00379799	0.0620508
CCDC153	-0.0670176	-0.00498601	0.0620316
SLC6A6	-0.274457	-0.212438	0.0620183
SUMO3	0.0307159	0.0926877	0.0619718
BHMT	-0.154338	-0.0924364	0.0619012
KRTAP5	-0.125079	-0.063227	0.0618518
BLOC1S1	-0.0503301	0.0115003	0.0618303
RAMP3	0.0473023	0.109131	0.0618287
XIAP	-0.0284705	0.0333072	0.0617777
MRPL20	-0.385431	-0.323699	0.0617319
HSD3B7	-0.217206	-0.15549	0.0617164
TNFAIP1	-0.0919087	-0.0302113	0.0616973
NONO	-0.277875	-0.216208	0.0616671
FGF6	-0.0450877	0.0165505	0.0616382
PHLDA3	-0.0558535	0.00574131	0.0615948
TP53I3	-0.259024	-0.197516	0.0615082
TMEM164	-0.0613522	0.000131726	0.0614839
MAFB	0.0077661	0.0692406	0.0614745
THAP8	-0.0815178	-0.020049	0.0614688
EID1	-0.0922199	-0.0308158	0.061404
TSEN54	-0.770474	-0.709093	0.0613809
RPE	-0.685836	-0.624469	0.061367
FCN1	0.00842987	0.0697836	0.0613537
JAG2	-0.00352184	0.0578252	0.061347
TEKT5	-0.0551889	0.00614791	0.0613368
NENF	-0.0608544	0.000479799	0.0613342
PCTP	0.00392448	0.0652474	0.0613229
H2AC4	-0.605764	-0.544511	0.0612531
ZNF418	-0.0138992	0.0472328	0.0611321
COG1	-0.581445	-0.520331	0.0611141
PDE12	-0.393556	-0.332455	0.0611009
SUCLG2	-0.0497474	0.0113523	0.0610997
ZNF436	-0.151351	-0.0902895	0.0610615
HARS2	-0.337412	-0.276407	0.0610049
HTR1D	0.0448501	0.105855	0.0610046
DMKN	-0.219729	-0.158739	0.0609897
FBXL6	-0.356376	-0.295429	0.0609461
F11R	-0.241106	-0.180185	0.0609219
HMG20B	-0.0135755	0.0473157	0.0608912
SUMF1	0.025805	0.086673	0.060868
DDX19A	-0.394475	-0.333631	0.0608437
PEX12	-0.142965	-0.0821575	0.0608075
DERL2	-0.325708	-0.264912	0.0607957
CHD8	-0.383908	-0.323113	0.060795
SPIC	-0.350819	-0.290088	0.060732
COPB1	-2.35755	-2.29684	0.0607138
GREB1	0.0857189	0.146379	0.0606606
TF	-0.119052	-0.058507	0.0605447
ZBTB33	-0.0579762	0.0025662	0.0605425
PLCL1	0.0315446	0.091973	0.0604284
GMCL1	-0.159632	-0.0992105	0.0604216
RUNX1T1	-0.0475848	0.0128335	0.0604183
C1GALT1C1	0.0592062	0.119605	0.0603992
NDUFB10	-0.724363	-0.663966	0.0603969
ELAVL3	-0.13938	-0.0790033	0.0603764
SMIM13	0.00788593	0.0682563	0.0603703
PSMB4	-2.53369	-2.47335	0.0603445
PSMD9	-0.295737	-0.235395	0.0603416
COG8	-0.689384	-0.629045	0.0603389
DAW1	-0.0143309	0.0460005	0.0603314
RFPL3	0.00686371	0.0671863	0.0603226
GPR107	0.00330323	0.0636195	0.0603163
LYPLA2	-0.223439	-0.163127	0.0603125
PPP1R21	-0.0930757	-0.0328295	0.0602462
C16orf46	-0.1137	-0.0534868	0.0602132
MTCH1	-0.0240316	0.0360488	0.0600804
HES5	-0.0781375	-0.0180647	0.0600729
VPS35	-0.584205	-0.524169	0.0600352
APAF1	0.0422652	0.102223	0.0599576
SHARPIN	-0.188302	-0.128348	0.0599539
TIMM13	-1.06938	-1.00945	0.0599365
SPANXN2	-0.0298014	0.0301187	0.05992
AADAC	0.0754516	0.135354	0.059902
CTTNBP2	-0.0285087	0.0313885	0.0598972
EIF3D	-1.68324	-1.6234	0.0598438
CACUL1	-0.0240091	0.035812	0.0598211
EIPR1	-0.197559	-0.137789	0.0597696
HNRNPL	-1.41317	-1.35342	0.0597521
APOBEC3C	-0.16724	-0.107502	0.059738
MEGF6	-0.0619682	-0.00224877	0.0597194
SPN	-0.0373734	0.0223396	0.059713
MCEE	-0.172762	-0.113075	0.0596875
NUDT1	-0.0313603	0.0283267	0.0596869
TOR3A	-0.10385	-0.0441885	0.059661
DMRTA1	-0.0989591	-0.0393002	0.0596589
PAPSS1	-0.0482526	0.0114052	0.0596578
FN1	0.0277609	0.0874182	0.0596573
TMEM87A	-0.088992	-0.0293456	0.0596464
NUP98	-0.867416	-0.807822	0.0595935
GJD4	-0.090949	-0.0313917	0.0595573
TJP3	-0.122646	-0.0631271	0.059519
STIMATE	-0.119304	-0.0597852	0.0595184
CPEB2	0.0307735	0.0902706	0.0594972
YEATS4	-0.797772	-0.738282	0.0594902
COP1	-0.287184	-0.227736	0.0594475
DCST2	-0.238583	-0.17925	0.0593336
DIPK2A	-0.0428853	0.0164264	0.0593118
EEF2	-2.5685	-2.50922	0.0592838
COA1	-0.0806388	-0.0213982	0.0592406
SGK3	0.055565	0.114787	0.0592225
IL27	-0.0765562	-0.017416	0.0591402
CHRNA6	-0.0663813	-0.00724516	0.0591362
OTUD5	-0.331023	-0.271894	0.0591294
PCGF6	-0.198897	-0.139781	0.0591164
STRADA	-0.130596	-0.0715114	0.059085
HMGCL	-0.131118	-0.072072	0.0590457
EMC2	-0.250371	-0.191341	0.0590301
SPNS2	-0.126111	-0.0670987	0.0590127
NCKAP1L	-0.154784	-0.0957828	0.0590007
SLC17A4	-0.0408788	0.0180651	0.0589439
KCNQ5	-0.0831832	-0.0242428	0.0589404
KCNMB2	0.0447525	0.103684	0.0589315
COX10	-0.381744	-0.322815	0.0589288
NCMAP	-0.222053	-0.163152	0.0589017
ZNF143	-0.463765	-0.404867	0.0588986
CFAP97	0.0194378	0.0783347	0.0588969
MICB	-0.250541	-0.191664	0.0588766
RAB27B	0.0840501	0.142919	0.058869
PRPF3	-1.00778	-0.948921	0.0588586
ACD	-0.366777	-0.307927	0.0588496
TRIM23	-0.0794647	-0.0206479	0.0588167
USP11	0.0489396	0.107755	0.0588149
CEACAM7	-0.0577158	0.00108027	0.058796
MTMR11	-0.106185	-0.0474073	0.058778
SPHKAP	0.0282104	0.086954	0.0587436
WDR53	-0.0810742	-0.0223536	0.0587206
DEFA5	0.0462351	0.104928	0.0586924
AP3M2	-0.266558	-0.207869	0.0586893
SRRM5	-0.0666541	-0.00796748	0.0586866
NUDT14	-0.0730696	-0.0144063	0.0586633
SMC2	-1.29926	-1.2406	0.0586632
LAMP3	-0.0533139	0.00532013	0.058634
TCP1	-1.85142	-1.7928	0.0586235
SPAG16	-0.0077474	0.0508632	0.0586106
DARS1	-1.91572	-1.85715	0.0585738
C1QTNF1	-0.26138	-0.202817	0.0585631
SLC19A3	-0.189123	-0.130623	0.0585
UFSP2	-0.134947	-0.0764742	0.0584726
AFAP1	0.0716935	0.130155	0.0584613
PWWP2A	-0.0753298	-0.0169101	0.0584196
KCNK3	0.0481159	0.106531	0.0584149
CDKN2AIP	-0.164513	-0.106107	0.0584059
CTLA4	-0.0871555	-0.0287565	0.058399
NMUR2	-0.0649533	-0.00656512	0.0583881
NINJ2	-0.0773571	-0.0189723	0.0583848
USP3	-0.0848875	-0.0265165	0.058371
SNX33	-0.0475902	0.0107619	0.0583522
PPP4R3B	-0.135264	-0.0769115	0.058352
BCLAF1	-0.751947	-0.693595	0.0583514
BSPRY	0.0472123	0.105555	0.0583431
GPX2	-0.142496	-0.0842106	0.0582852
ADIPOQ	0.0408846	0.0991528	0.0582682
NFU1	-0.320461	-0.262211	0.0582498
TATDN2	-0.130693	-0.0724478	0.0582452
PGAP1	-0.080845	-0.0226608	0.0581843
DENND1A	-0.0203232	0.037835	0.0581583
TMEM51	0.0292085	0.0873549	0.0581464
NDUFA10	-0.309815	-0.251672	0.058143
SRD5A1	0.0484403	0.106568	0.0581273
TEN1	-0.569833	-0.511707	0.0581264
RUNDC3A	-0.213945	-0.155831	0.0581138
TMEM230	-0.371031	-0.312921	0.0581096
PSMA3	-2.8288	-2.77069	0.0581081
DDC	0.0293511	0.0874464	0.0580953
NTRK1	-0.0969618	-0.0388789	0.0580829
SLC11A2	-0.198191	-0.140121	0.0580708
TSPYL6	-0.103751	-0.0456845	0.0580661
UNK	-0.173145	-0.115082	0.0580627
LRTM2	0.0454526	0.103477	0.0580245
RGL3	0.00060502	0.0586212	0.0580161
ARL5C	-0.212045	-0.154042	0.0580033
PSPH	-0.0894779	-0.0315291	0.0579488
CDK2AP1	-0.26131	-0.203371	0.0579384
UXS1	-0.438675	-0.380758	0.0579173
GSTK1	-0.0147021	0.0431911	0.0578932
WFDC11	-0.0140402	0.0438335	0.0578738
SIRT5	-0.0880603	-0.0302264	0.0578339
UBE2QL1	-0.0596188	-0.00180296	0.0578159
HROB	-0.203542	-0.145728	0.0578133
FAHD2B	-0.246539	-0.188748	0.0577911
ATP5MC2	-0.419586	-0.361799	0.0577865
PAQR7	-0.103366	-0.0455815	0.0577849
SLC37A3	-0.058539	-0.000759795	0.0577792
GRPEL1	-1.39675	-1.33909	0.0576626
FAM3D	0.00715702	0.0647914	0.0576343
METTL15	-0.469122	-0.411494	0.0576278
FETUB	-0.126819	-0.0692014	0.057618
SELENON	-0.10129	-0.0437099	0.0575805
HFE	-0.0284999	0.0290713	0.0575712
LYSET	-0.261081	-0.203611	0.0574696
TBC1D23	-0.153855	-0.0963924	0.0574628
TCF20	-0.0827535	-0.0253049	0.0574486
ADCY9	0.00684475	0.0642779	0.0574332
C11orf52	0.0325687	0.0899589	0.0573902
CDCP2	-0.292988	-0.235681	0.0573073
ATP2B4	-0.212839	-0.155564	0.0572751
ZMAT3	0.0824617	0.139685	0.0572235
NOXA1	-0.0986392	-0.041431	0.0572081
SYNJ2	0.00502304	0.0622089	0.0571858
BMP7	0.0124894	0.0696571	0.0571677
MRGPRX2	0.014177	0.0713422	0.0571652
SERPINB9	0.0764754	0.133641	0.0571652
CFAP141	-0.0658852	-0.00872229	0.057163
C19orf47	-0.111339	-0.0541888	0.0571504
SCGB1A1	-0.122654	-0.0655701	0.0570836
MOG	-0.277226	-0.220157	0.0570687
MKNK2	0.0324828	0.0895414	0.0570586
TCL1A	-0.00129271	0.0557321	0.0570248
RPRD1B	-0.432959	-0.375935	0.0570241
TYK2	-0.0490646	0.00794713	0.0570118
PARD3B	0.0541032	0.111065	0.0569618
PLLP	-0.00622902	0.0507219	0.0569509
SCGB1D2	-0.146883	-0.0899629	0.05692
ADAM15	-0.129313	-0.0724795	0.0568335
KRT5	-0.114311	-0.057491	0.0568197
SGPL1	-0.0786541	-0.0218349	0.0568192
RIPK4	-0.149859	-0.0930707	0.0567878
ARMCX3	-0.00221574	0.054569	0.0567847
COQ3	-0.279306	-0.222546	0.0567604
PHC3	0.0227178	0.0794674	0.0567496
RALY	-0.129503	-0.0727957	0.0567073
ZSWIM6	-0.0250696	0.0315833	0.0566529
GIPC3	-0.169285	-0.112634	0.056651
KAT6B	-0.0876273	-0.0309878	0.0566396
ZDHHC5	-0.118533	-0.0618978	0.0566349
SPAM1	0.0205801	0.0771903	0.0566103
IL10	-0.011388	0.0452078	0.0565958
SLTM	-0.1847	-0.128117	0.0565825
COL16A1	0.0371261	0.0937081	0.056582
CTDSPL2	-0.131692	-0.0751565	0.0565358
MALSU1	-0.0772809	-0.0207486	0.0565323
MYO16	0.00879962	0.0653236	0.056524
ZNF134	-0.0187986	0.037722	0.0565206
USP7	-0.828354	-0.771853	0.0565008
PDRG1	-1.58502	-1.52853	0.0564952
[truncated: 15,203 more rows]
