# Supplementary material for: Epigenetic Plasticity Drives Carcinogenesis and Multi-Therapy Resistance in Multiple Myeloma
Source: Research Square preprint supplement (doi:10.21203/rs.3.rs-6306816/v1), 2025-04-15
Supplement: Supplementary file 4 [file 1a8064cd0ddf47fe027dc94f.xlsx]

## Sheet: Sheet1
Sample_ID	Gender	Age	Race	Del_1p	Amp_dup_1q21	Del_13q	Del_17p	t(4;14)	t(11;14)	t(14;16)	Gain_1q21	Amp_1q21	Monosomy_1	Trisomy_1	Monosomy_17	Trisomy_17	Gain_1p	Del_1q21	Partial_Del_13q	Gain_13q	Partial_Gain_13q	Gain_17p	Partial_Del_17p	Partial_Gain_17p	Del_4p	Gain_4p	Del_11q	Gain_11q	Del_16q	Gain_16q	Del_14q	Gain_14q
H_1*	Male	35	White	NA	NA	NA	NA	NA	NA	NA	NA	NA	NA	NA	NA	NA	NA	NA	NA	NA	NA	NA	NA	NA	NA	NA	NA	NA	NA	NA	NA	NA
H_2*	Male	35	White	NA	NA	NA	NA	NA	NA	NA	NA	NA	NA	NA	NA	NA	NA	NA	NA	NA	NA	NA	NA	NA	NA	NA	NA	NA	NA	NA	NA	NA
MGUS_1	Male	74	White	0	0	0	0	0	0	0	0	0	0	0	0	0	0	0	0	0	0	0	0	0	0	0	0	0	0	0	0	0
MGUS_2	Female	73	White	0	0	0	0.055	0	0	0	0	0	0	0	0.055	0	0	0	0	0	0	0	0.055	0	0	0	0	0	0	0	0	0
MGUS_3	Male	85	White	0	0	0	0	0	0	0	0	0	0	0	0	0	0	0	0	0	0	0	0	0	0	0	0	0	0	0	0	0
SMM_1	Female	76	White	0	0	0	0	0	0.48	0	0	0	0	0	0	0	0	0	0	0	0	0	0	0	0	0	0	0.48	0	0	0	0.396667
SMM_2	Female	58	White	0	0.055	0.38	0	0	0	0	0.055	0	0	0	0	0	0	0	0	0	0	0	0	0	0	0	0	0	0	0	0.341667	0
SMM_3	Male	71	Missing	0	0.78	0.085	0	0	0	0	0.78	0	0	0	0	0	0	0	0	0	0	0	0	0	0	0	0	0	0	0	0.908333	0
SMM_4	Female	63	White	0	0	0	0	0	0	0	0	0	0	0	0	0	0	0	0	0	0	0	0	0	0	0	0	0.61	0	0	0	0
NDMM_1	Male	66	White	0	0.12	0.065	0	0	0.835	0	0.12	0	0	0	0	0	0	0	0	0	0	0	0	0	0	0	0	0.835	0	0	0	0.798333
NDMM_2	Male	82	White	0.045	0	0.925	0.86	0	0	0	0	0	0	0	0	0	0	0	0	0	0	0	0	0	0	0	0	0	0	0	0	0
NDMM_3	Female	63	White	0	0	0	0	0	0	0	0	0	0	0	0	0	0	0	0	0	0	0	0	0	0	0	0	0.72	0	0	0	0
ERMM_1	Male	79	White	0	0.935	0	0	0	0	0	0.935	0	0	0	0	0	0	0	0	0	0	0	0	0	0	0	0	0.915	0	0	0	0
LRMM_1	Female	63	White	0	0	0.955	0	0	0	0	0	0	0	0	0	0	0	0	0	0	0	0	0.75	0.075	0	0	0	0.795	0.93	0	0	0
LRMM_2	Male	54	White	0.995	0.995	0.96	0	0.4225	0	0	0	0.995	0	0	0	0	0	0	0	0	0	0	0	0	0	0	0	0	0	0	0	0
LRMM_3	Female	76	White	0	0.455	0.525	0	0	0	0	0.455	0	0	0	0	0	0	0	0	0	0	0	0	0	0	0	0	0	0	0	0.313333	0
LRMM_4	Male	48	Black/African American	0	0	0.865	0.87	0	0	0	0	0	0	0	0	0	0	0	0	0	0	0	0	0	0	0	0	0.715	0	0	0	0.526667
LRMM_5	Male	68	White	0	0	0	0	0	0	0	0	0	0	0	0	0	0	0	0	0	0	0	0	0	0	0	0	0	0	0	0	0
*FISH not performed.
