# Supplementary material for: Epigenetic Plasticity Drives Carcinogenesis and Multi-Therapy Resistance in Multiple Myeloma
Source: Research Square preprint supplement (doi:10.21203/rs.3.rs-6306816/v1), 2025-04-15
Supplement: Supplementary file 5 [file 1fb422e68db8f1fa1cbd255d.xlsx]

## Sheet: Quadrants2_Averaged_Alpha_Beta_
RNAseq_SLID	Disease_status	PC1_coordinate	PC2_coordinate	PC1>0	Quadrant	Supercluster_Alpha	Supercluster_Beta	UAMS_Subgroup	Female_gender	AfricanAmerican_race	Hispanic_ethnicity	age_at_collection	os_days	os_status	ttp_days	ttp_status	pfs_days	pfs_status	BMPC_20	M_protein_serum_2gdl	FLCr_20	Mayo_Risk_2008	Mayo_Risk_2018	ISS	R_ISS	t11_14_	t14_16_	t4_14_	del_1p_	del_13q_	del_17p_	amp_dup_1q21_	Double_hit	Triple_hit	ABCF1	ACTG1	ARID1A	ARID2	ATM	ATRX	BCL7A	BHLHE41	BRAF	BTG1	CCND1	CDKN1B	CDKN2C	CREBBP	CYLD
SL204930	Newly Diagnosed Multiple Myeloma	-0.0128791	-0.130235	No	Q2	0.102721	-0.33568	HY	0	0	0	40	1689	0	NA	NA	1681	0	NA	NA	NA	NA	NA	2	2	0	0	0	0	0	0	0	0	0	0	0	0	0	0	0	0	0	0	0	0	0	0	0	0
SL204931	Late Relapse Multiple Myeloma	0.197731	-0.0883767	Yes	Q3	0.443345	-0.488486	LB	1	0	0	53	169	1	NA	NA	NA	NA	NA	NA	NA	NA	NA	3	3	0	0	0	0	0	0	1	0	0	0	0	0	0	0	0	0	0	0	0	0	0	0	0	0
SL204932	Newly Diagnosed Multiple Myeloma	0.228236	-0.106986	Yes	Q3	0.211633	-0.275096	CD1	0	0	0	63	1322	0	NA	NA	535	1	NA	NA	NA	NA	NA	1	1	1	0	0	0	0	0	0	0	0	0	0	0	0	0	0	0	0	0	0	0	0	0	0	0
SL204933	Early Relapse Multiple Myeloma	0.355192	-0.179288	Yes	Q3	0.815527	-0.122175	PR	0	1	0	64	156	1	NA	NA	NA	NA	NA	NA	NA	NA	NA	NA	NA	0	0	0	0	0	1	1	1	0	0	0	0	0	0	0	0	0	0	0	0	0	0	0	0
SL204934	Late Relapse Multiple Myeloma	-0.0851631	-0.0412835	No	Q2	0.0124892	-0.0556993	HY	1	0	0	76	37	1	NA	NA	NA	NA	NA	NA	NA	NA	NA	3	NA	0	0	0	0	1	0	0	0	0	0	0	0	0	0	0	0	0	0	0	0	0	0	0	0
SL204935	Smoldering Multiple Myeloma	-0.0916392	-0.0237494	No	Q2	0.278662	0.231336	LB	1	0	0	69	223	1	223	0	NA	NA	0	0	1	2	2	NA	NA	0	1	0	0	1	0	1	1	0	0	0	0	0	0	0	0	0	1	0	0	0	0	0	0
SL204936	Late Relapse Multiple Myeloma	0.32081	-0.0116138	Yes	Q3	0.571478	-0.187726	PR	1	0	0	52	143	1	NA	NA	NA	NA	NA	NA	NA	NA	NA	2	2	0	0	0	0	1	1	0	1	0	0	0	0	0	0	0	0	0	0	0	0	0	0	0	0
SL204937	Newly Diagnosed Multiple Myeloma	-0.0297822	-0.239612	No	Q2	-0.0345379	-0.423142	HY	0	0	0	53	979	0	NA	NA	976	0	NA	NA	NA	NA	NA	2	2	0	0	0	0	0	0	0	0	0	0	0	0	0	0	0	0	0	0	0	0	0	0	0	0
SL204938	Newly Diagnosed Multiple Myeloma	0.156325	-0.223333	Yes	Q3	0.43446	0.0701923	LB	0	0	0	61	417	1	NA	NA	304	1	NA	NA	NA	NA	NA	1	2	0	0	0	0	1	1	0	1	0	0	0	0	0	0	0	0	0	0	0	0	0	0	0	0
SL204939	Early Relapse Multiple Myeloma	0.19391	-0.259193	Yes	Q3	0.335753	-0.345592	CD2	0	0	0	68	1078	1	NA	NA	NA	NA	NA	NA	NA	NA	NA	3	2	1	0	0	0	0	0	0	0	0	0	0	0	0	1	0	0	0	0	0	0	0	0	0	0
SL204940	Newly Diagnosed Multiple Myeloma	0.0335883	-0.283538	Yes	Q3	0.0426243	-0.439434	LB	0	0	0	59	1146	1	NA	NA	141	1	NA	NA	NA	NA	NA	3	2	0	0	0	0	1	0	1	0	0	0	0	1	0	0	0	0	0	0	0	0	0	0	0	0
SL204941	Early Relapse Multiple Myeloma	0.138248	0.0473144	Yes	Q4	0.499153	0.196157	PR	1	0	0	60	1408	1	NA	NA	NA	NA	NA	NA	NA	NA	NA	1	2	0	1	0	0	0	1	1	1	1	0	0	0	0	0	0	0	0	0	0	0	0	0	0	0
SL204942	Newly Diagnosed Multiple Myeloma	-0.493275	-0.225923	No	Q2	-0.511671	0.219402	CD2	1	1	0	63	1115	1	NA	NA	1111	1	NA	NA	NA	NA	NA	NA	NA	0	0	0	0	0	0	0	0	0	0	0	0	0	0	0	1	0	0	0	0	0	0	0	0
SL204943	Late Relapse Multiple Myeloma	0.0164814	-0.0142652	Yes	Q3	-0.101712	-0.461311	HY	1	0	0	65	1373	0	NA	NA	NA	NA	NA	NA	NA	NA	NA	1	1	0	0	0	0	0	0	0	0	0	0	0	0	0	0	0	0	0	0	0	0	0	0	0	0
SL204944	Newly Diagnosed Multiple Myeloma	-0.0171171	-0.230383	No	Q2	-0.3544	-0.646186	HY	1	1	0	58	1220	0	NA	NA	1213	0	NA	NA	NA	NA	NA	2	2	0	0	0	0	0	0	0	0	0	0	0	0	0	0	0	0	0	0	0	0	0	0	0	0
SL204945	Late Relapse Multiple Myeloma	-0.13532	-0.287497	No	Q2	-0.0447211	-0.118236	MS	0	1	0	60	425	1	NA	NA	NA	NA	NA	NA	NA	NA	NA	NA	NA	0	0	1	0	0	0	1	1	0	0	0	0	0	0	0	1	0	0	0	0	0	0	0	0
SL204946	Newly Diagnosed Multiple Myeloma	-0.140121	-0.220718	No	Q2	0.128696	-0.20459	CD2	1	0	0	66	1729	0	NA	NA	1702	0	NA	NA	NA	NA	NA	1	1	0	0	0	0	1	0	0	0	0	0	0	0	0	0	0	0	0	0	0	0	0	0	0	0
SL204947	Early Relapse Multiple Myeloma	0.266495	-0.178143	Yes	Q3	0.620583	-0.0694467	PR	0	0	0	62	55	1	NA	NA	NA	NA	NA	NA	NA	NA	NA	1	2	0	0	0	0	0	0	1	0	0	0	0	0	0	0	0	0	0	0	0	0	0	0	0	0
SL204948	Early Relapse Multiple Myeloma	-0.121265	-0.291587	No	Q2	-0.235128	-0.22088	MS	0	0	0	67	1365	1	NA	NA	NA	NA	NA	NA	NA	NA	NA	2	2	0	0	1	0	1	0	1	1	0	0	0	0	0	0	0	0	0	0	0	0	0	0	0	0
SL204949	Late Relapse Multiple Myeloma	0.0980103	-0.195927	Yes	Q3	0.364607	-0.280453	LB	1	0	0	71	434	1	NA	NA	NA	NA	NA	NA	NA	NA	NA	3	2	0	0	0	0	0	0	1	0	0	0	0	0	0	0	0	0	0	1	0	0	0	0	0	1
SL215225	Late Relapse Multiple Myeloma	-0.244825	-0.138544	No	Q2	-2.24527	-0.38899	MF	1	1	0	62	1929	0	NA	NA	NA	NA	NA	NA	NA	NA	NA	NA	NA	1	0	0	0	1	1	1	1	0	0	0	0	0	0	0	0	0	0	0	0	0	0	0	0
SL215226	Newly Diagnosed Multiple Myeloma	-0.237507	-0.302332	No	Q2	-1.68574	-0.737357	MF	1	0	0	76	820	1	NA	NA	809	1	NA	NA	NA	NA	NA	1	2	0	0	0	0	0	0	0	0	0	0	0	0	0	0	0	0	0	0	0	0	0	0	0	0
SL215227	Newly Diagnosed Multiple Myeloma	-0.110189	-0.343094	No	Q2	-0.949202	-0.343268	HY	0	0	0	71	690	1	NA	NA	506	1	NA	NA	NA	NA	NA	1	2	0	0	0	0	0	0	1	0	0	0	0	0	0	0	0	0	0	0	0	0	0	0	0	0
SL215229	Newly Diagnosed Multiple Myeloma	-0.244991	-0.353405	No	Q2	-0.661893	-0.221691	MS	0	NA	1	40	2809	0	NA	NA	2794	0	NA	NA	NA	NA	NA	1	2	0	0	0	0	0	0	0	0	0	0	0	0	0	0	0	0	0	1	0	0	0	0	0	0
SL215230	Smoldering Multiple Myeloma	-0.175609	-0.0386547	No	Q2	-2.92341	-0.495712	MF	0	0	0	54	1708	1	329	1	NA	NA	1	0	0	1	2	NA	NA	NA	NA	NA	NA	NA	NA	NA	NA	NA	0	0	0	0	0	0	0	0	0	0	0	0	0	0	0
SL215231	Early Relapse Multiple Myeloma	0.0228085	-0.190589	Yes	Q3	0.0889598	-0.265759	LB	0	0	0	77	1360	1	NA	NA	NA	NA	NA	NA	NA	NA	NA	2	2	0	0	0	0	0	0	1	0	0	0	0	0	0	0	0	0	0	0	0	0	0	0	0	0
SL215233	Newly Diagnosed Multiple Myeloma	-0.0519548	-0.160809	No	Q2	-0.207827	-0.219648	CD2	0	0	1	63	2818	0	NA	NA	335	1	NA	NA	NA	NA	NA	1	2	0	0	0	0	1	0	0	0	0	0	0	0	0	0	0	0	0	0	0	0	0	0	0	0
SL215234	Newly Diagnosed Multiple Myeloma	-0.0161696	-0.225656	No	Q2	0.172291	-0.0440076	MF	1	0	0	64	3052	0	NA	NA	1734	1	NA	NA	NA	NA	NA	1	2	0	1	0	0	1	0	1	1	0	0	0	0	0	0	0	0	0	0	0	0	0	0	0	0
SL215235	Newly Diagnosed Multiple Myeloma	-0.164834	-0.251295	No	Q2	-0.284175	-0.298809	LB	0	0	0	62	2386	1	NA	NA	646	1	NA	NA	NA	NA	NA	1	2	0	0	0	0	0	0	1	0	0	0	0	0	0	0	0	0	0	0	0	0	0	0	0	0
SL215237	Newly Diagnosed Multiple Myeloma	-0.214824	-0.00284551	No	Q2	-1.38176	0.4584	MF	0	0	0	83	2392	0	NA	NA	2385	0	NA	NA	NA	NA	NA	1	2	0	0	0	0	0	0	0	0	0	0	0	0	0	0	0	0	0	0	0	0	0	0	0	0
SL215238	Early Relapse Multiple Myeloma	-0.182967	-0.223963	No	Q2	-1.19745	-0.382308	MF	0	0	0	64	2523	0	NA	NA	NA	NA	NA	NA	NA	NA	NA	1	2	0	0	0	0	1	1	0	0	0	0	0	0	0	0	0	0	0	0	0	0	0	0	0	0
SL215239	Newly Diagnosed Multiple Myeloma	-0.100039	-0.0426201	No	Q2	-0.650885	0.877701	PR	0	0	0	75	2285	0	NA	NA	2254	0	NA	NA	NA	NA	NA	1	2	0	0	0	0	0	1	0	0	0	0	0	0	0	0	0	0	0	0	0	0	0	0	0	0
SL215240	Early Relapse Multiple Myeloma	-0.0460342	0.0326308	No	Q1	0.266283	1.18376	PR	0	0	0	56	1239	1	NA	NA	NA	NA	NA	NA	NA	NA	NA	1	1	0	0	0	0	0	0	0	0	0	0	0	0	0	0	0	0	0	0	0	0	0	0	0	0
SL215241	Newly Diagnosed Multiple Myeloma	-0.236639	-0.231893	No	Q2	-1.58239	-0.38664	LB	0	0	0	70	1611	1	NA	NA	1590	1	NA	NA	NA	NA	NA	3	3	0	0	0	0	1	0	1	0	0	0	0	0	0	0	0	0	0	0	0	0	0	0	0	0
SL215242	Newly Diagnosed Multiple Myeloma	-0.0848382	-0.224819	No	Q2	-0.519361	-0.644011	CD2	0	0	0	50	2601	0	NA	NA	2583	0	NA	NA	NA	NA	NA	1	2	0	0	0	0	1	0	0	0	0	0	0	0	0	0	0	0	0	0	0	0	0	0	0	0
SL215244	Newly Diagnosed Multiple Myeloma	-0.175185	-0.0659735	No	Q2	0.0248128	0.5126	LB	0	1	0	67	1924	0	NA	NA	1897	0	NA	NA	NA	NA	NA	1	2	0	0	0	0	1	0	0	0	0	0	0	0	0	0	0	0	0	0	0	0	0	0	0	0
SL215245	Newly Diagnosed Multiple Myeloma	0.0984896	-0.307628	Yes	Q3	-0.210111	-0.213699	CD2	0	0	0	33	1728	0	NA	NA	1728	0	NA	NA	NA	NA	NA	NA	NA	1	0	0	0	1	0	0	0	0	0	0	0	0	0	0	0	0	0	0	0	0	0	0	0
SL215247	Newly Diagnosed Multiple Myeloma	-0.0704121	-0.226701	No	Q2	-1.69408	-0.852762	HY	0	0	0	45	1953	0	NA	NA	1925	0	NA	NA	NA	NA	NA	1	1	0	0	0	0	1	0	0	0	0	0	0	0	0	0	0	0	0	0	0	0	0	0	0	0
SL215248	Newly Diagnosed Multiple Myeloma	0.0163958	-0.201399	Yes	Q3	0.240772	-0.213102	LB	1	1	0	56	2231	0	NA	NA	2232	0	NA	NA	NA	NA	NA	3	3	0	0	0	0	1	0	0	0	0	0	0	0	0	0	0	0	0	0	0	0	0	0	0	0
SL215249	Smoldering Multiple Myeloma	0.23732	-0.258793	Yes	Q3	0.305405	-0.518586	LB	0	0	0	68	2645	0	1598	1	NA	NA	1	0	0	2	2	NA	NA	0	0	0	0	0	0	0	0	0	0	0	0	0	0	0	0	0	0	0	0	0	0	0	0
SL215250	Newly Diagnosed Multiple Myeloma	-0.0123883	-0.28906	No	Q2	-0.10054	-0.48156	LB	0	1	0	79	1198	1	NA	NA	1198	1	NA	NA	NA	NA	NA	3	3	0	0	0	0	1	0	1	0	0	0	0	0	0	0	0	0	0	0	0	0	0	0	0	0
SL215253	Newly Diagnosed Multiple Myeloma	-0.130079	-0.179623	No	Q2	-0.198123	0.0393376	HY	0	0	0	43	1581	0	NA	NA	817	1	NA	NA	NA	NA	NA	1	2	0	0	0	1	1	1	0	0	0	0	0	0	0	0	0	0	0	0	0	0	0	0	0	0
SL215254	Newly Diagnosed Multiple Myeloma	0.106062	-0.148008	Yes	Q3	-0.150719	-0.804035	CD2	1	0	0	66	2524	0	NA	NA	1434	1	NA	NA	NA	NA	NA	3	3	1	0	0	0	1	0	0	0	0	0	0	0	1	0	0	0	0	0	0	0	0	0	0	0
SL215255	Newly Diagnosed Multiple Myeloma	0.249524	-0.126716	Yes	Q3	0.57844	-0.454874	CD1	1	0	0	73	828	1	NA	NA	385	1	NA	NA	NA	NA	NA	2	2	1	0	0	0	1	1	0	1	0	0	0	0	0	0	0	0	0	0	0	0	0	0	0	0
SL215256	Early Relapse Multiple Myeloma	0.241735	-0.108579	Yes	Q3	0.734299	-0.318522	CD1	1	0	0	75	61	1	NA	NA	NA	NA	NA	NA	NA	NA	NA	2	2	1	0	0	0	1	1	1	1	0	0	0	0	0	0	0	0	0	0	0	0	0	0	0	0
SL215257	Newly Diagnosed Multiple Myeloma	0.124712	-0.314828	Yes	Q3	-0.218854	-0.480382	MS	1	0	0	77	1784	0	NA	NA	1660	0	NA	NA	NA	NA	NA	2	2	0	0	0	0	0	0	1	0	0	0	0	0	0	1	0	0	0	0	0	0	0	0	0	0
SL215258	Newly Diagnosed Multiple Myeloma	0.283384	-0.224817	Yes	Q3	0.480513	-0.557118	LB	1	0	0	56	1787	1	NA	NA	791	1	NA	NA	NA	NA	NA	1	1	0	0	0	0	1	0	1	0	0	0	0	0	0	0	0	0	0	0	0	0	0	0	0	0
SL215259	Early Relapse Multiple Myeloma	0.24965	-0.167441	Yes	Q3	0.410912	-0.388156	LB	1	0	0	58	1003	1	NA	NA	NA	NA	NA	NA	NA	NA	NA	1	NA	0	0	0	0	1	0	1	0	0	0	0	0	0	0	0	0	0	0	0	0	0	0	0	0
SL215261	Early Relapse Multiple Myeloma	-0.170963	-0.125713	No	Q2	-0.303794	0.0390977	CD2	0	0	0	52	1500	0	NA	NA	NA	NA	NA	NA	NA	NA	NA	1	NA	1	0	0	0	0	0	0	0	0	0	0	0	0	0	0	0	0	0	0	0	0	0	0	0
SL215262	Early Relapse Multiple Myeloma	-0.361885	-0.00978469	No	Q2	-0.462968	0.589881	MF	0	0	0	70	800	1	NA	NA	NA	NA	NA	NA	NA	NA	NA	1	1	0	0	0	0	0	0	0	0	0	0	0	0	0	0	0	0	0	0	0	0	0	0	0	0
SL215264	Newly Diagnosed Multiple Myeloma	-0.0718319	-0.199515	No	Q2	-0.457108	-0.653224	HY	1	0	1	62	1583	0	NA	NA	1576	0	NA	NA	NA	NA	NA	3	2	0	0	0	0	0	0	0	0	0	0	0	0	0	1	0	0	0	0	0	0	0	0	0	0
SL215265	Newly Diagnosed Multiple Myeloma	0.307502	-0.225024	Yes	Q3	0.593012	-0.13497	LB	0	0	0	68	1119	1	NA	NA	1113	1	NA	NA	NA	NA	NA	1	2	0	0	0	1	0	0	1	0	0	0	0	0	0	0	0	0	0	0	0	0	0	0	0	0
SL215266	Newly Diagnosed Multiple Myeloma	-0.0745116	-0.33081	No	Q2	-0.151562	-0.463037	HY	0	0	0	64	1176	0	NA	NA	225	1	NA	NA	NA	NA	NA	1	1	0	0	0	0	0	0	0	0	0	0	0	0	0	0	0	0	0	0	0	0	0	0	0	0
SL215267	Early Relapse Multiple Myeloma	0.00494132	-0.0178242	Yes	Q3	0.209321	-0.39718	HY	0	0	0	50	0	0	NA	NA	NA	NA	NA	NA	NA	NA	NA	3	2	0	0	0	0	1	0	0	0	0	0	1	0	0	0	0	0	0	0	0	0	0	0	0	0
SL215268	Newly Diagnosed Multiple Myeloma	-0.331526	0.172293	No	Q1	-0.12145	0.95977	MF	0	0	0	68	11	0	NA	NA	346	0	NA	NA	NA	NA	NA	2	2	1	0	0	0	0	0	0	0	0	0	0	0	0	0	0	0	0	0	0	0	0	0	0	0
SL215269	Newly Diagnosed Multiple Myeloma	0.062783	-0.144315	Yes	Q3	0.148847	-0.335695	HY	0	0	0	72	198	1	NA	NA	177	1	NA	NA	NA	NA	NA	2	2	0	0	0	0	1	0	0	0	0	0	0	0	0	0	0	0	0	0	0	0	0	0	1	0
SL215270	Newly Diagnosed Multiple Myeloma	0.0365898	-0.171859	Yes	Q3	0.198665	-0.280949	CD2	0	0	0	82	852	1	NA	NA	851	1	NA	NA	NA	NA	NA	3	2	1	0	0	0	0	0	1	0	0	0	0	0	0	0	0	0	0	0	0	0	0	0	0	0
SL215271	Newly Diagnosed Multiple Myeloma	0.318786	-0.115421	Yes	Q3	0.392235	-0.35586	MS	1	0	1	64	247	1	NA	NA	48	1	NA	NA	NA	NA	NA	2	2	0	0	1	0	1	1	0	1	0	0	0	0	0	0	0	0	0	0	0	0	0	0	0	0
SL217463	Early Relapse Multiple Myeloma	-0.295985	-0.150077	No	Q2	-3.70765	-0.465919	MF	0	0	0	82	1044	1	NA	NA	NA	NA	NA	NA	NA	NA	NA	1	2	1	0	0	0	0	0	0	0	0	0	0	0	0	0	0	0	0	1	0	1	0	0	0	0
SL217464	Early Relapse Multiple Myeloma	-0.0924893	-0.254809	No	Q2	-1.24072	-0.388984	MF	0	0	0	65	996	1	NA	NA	NA	NA	NA	NA	NA	NA	NA	1	1	0	0	0	0	1	0	0	0	0	0	0	0	0	1	0	0	0	0	0	0	0	0	0	0
SL217465	Early Relapse Multiple Myeloma	-0.278136	-0.268986	No	Q2	-2.3193	-0.27297	MF	0	0	0	76	1299	1	NA	NA	NA	NA	NA	NA	NA	NA	NA	NA	NA	0	0	0	0	0	0	0	0	0	0	0	0	0	0	0	0	0	0	0	0	0	0	0	0
SL217466	Early Relapse Multiple Myeloma	-0.184257	-0.114463	No	Q2	-2.47446	-1.00534	MF	0	0	0	51	1727	0	NA	NA	NA	NA	NA	NA	NA	NA	NA	1	1	1	0	0	0	0	0	0	0	0	0	0	0	0	0	0	0	1	0	0	0	0	0	0	0
SL217467	Early Relapse Multiple Myeloma	-0.196021	-0.182634	No	Q2	-3.01502	-0.727733	MF	0	0	0	63	324	1	NA	NA	NA	NA	NA	NA	NA	NA	NA	1	2	0	0	1	0	1	0	1	1	0	0	0	0	0	0	0	0	0	0	0	0	0	0	0	0
SL217468	Newly Diagnosed Multiple Myeloma	-0.179982	-0.383102	No	Q2	-1.33681	-0.42486	PR	0	0	0	61	448	1	NA	NA	355	1	NA	NA	NA	NA	NA	1	1	0	0	0	0	0	0	1	0	0	0	0	0	0	0	0	0	0	0	0	0	0	0	0	0
SL217469	Newly Diagnosed Multiple Myeloma	-0.165755	-0.151343	No	Q2	-1.53423	-0.447992	MF	0	0	1	35	2853	0	NA	NA	2847	0	NA	NA	NA	NA	NA	2	2	0	0	0	0	0	0	0	0	0	0	0	0	0	0	0	0	0	0	0	0	0	0	0	0
SL217470	Newly Diagnosed Multiple Myeloma	-0.000930772	-0.140649	No	Q2	0.016412	-0.119146	LB	0	0	0	50	833	1	NA	NA	373	1	NA	NA	NA	NA	NA	1	2	0	0	0	1	0	0	0	0	0	0	0	0	0	1	0	0	0	0	0	0	0	0	0	0
SL217471	Newly Diagnosed Multiple Myeloma	-0.111953	-0.358457	No	Q2	-0.351917	-0.403283	CD1	0	0	0	40	895	1	NA	NA	887	1	NA	NA	NA	NA	NA	1	2	1	0	0	0	1	0	0	0	0	0	0	0	0	0	0	0	0	0	0	0	0	0	0	0
SL217472	Newly Diagnosed Multiple Myeloma	-0.376183	-0.484016	No	Q2	-1.70774	0.558095	MF	0	0	0	71	1475	1	NA	NA	602	1	NA	NA	NA	NA	NA	3	3	1	0	0	0	0	0	1	0	0	0	0	0	0	0	0	0	0	1	0	0	0	0	0	0
SL217473	Newly Diagnosed Multiple Myeloma	-0.243122	-0.348913	No	Q2	-1.92902	-0.477527	MS	0	0	0	64	139	1	NA	NA	125	1	NA	NA	NA	NA	NA	3	3	0	0	1	0	0	0	0	0	0	0	0	0	0	0	0	0	0	0	0	0	0	0	0	0
SL217474	Newly Diagnosed Multiple Myeloma	-0.15662	-0.0642129	No	Q2	-2.49779	-1.01553	HY	1	0	0	66	250	1	NA	NA	248	1	NA	NA	NA	NA	NA	3	NA	0	0	0	0	0	0	0	0	0	0	0	0	0	0	0	0	0	0	0	0	0	0	0	0
SL217476	Late Relapse Multiple Myeloma	0.0612033	-0.177012	Yes	Q3	-0.332199	-0.473568	MS	0	0	0	53	169	1	NA	NA	NA	NA	NA	NA	NA	NA	NA	2	2	0	0	1	0	1	1	0	1	1	0	0	1	0	0	0	0	0	0	0	0	0	0	0	0
SL217477	Late Relapse Multiple Myeloma	-0.164186	-0.312516	No	Q2	-0.604873	0.1834	CD2	1	0	0	59	169	1	NA	NA	NA	NA	NA	NA	NA	NA	NA	2	2	1	0	0	0	1	0	1	1	0	0	0	0	0	1	0	0	0	0	0	0	0	0	0	0
SL217478	Newly Diagnosed Multiple Myeloma	-0.0391871	-0.489807	No	Q2	-0.968331	-0.736285	CD1	1	0	0	65	58	1	NA	NA	59	1	NA	NA	NA	NA	NA	2	2	1	0	0	0	1	0	0	0	0	0	0	0	0	0	0	0	0	0	0	0	0	0	0	0
SL217479	Late Relapse Multiple Myeloma	-0.136183	-0.294034	No	Q2	-0.788789	-0.138129	PR	0	0	0	72	89	1	NA	NA	NA	NA	NA	NA	NA	NA	NA	2	2	0	0	0	0	1	0	1	0	0	0	1	0	0	0	0	0	0	0	0	0	0	0	0	0
SL217481	Late Relapse Multiple Myeloma	0.0261724	-0.138375	Yes	Q3	-0.309239	-0.217759	LB	1	0	0	72	430	1	NA	NA	NA	NA	NA	NA	NA	NA	NA	3	3	0	0	0	0	1	1	1	1	0	0	0	0	0	0	0	0	0	0	0	0	0	0	0	1
SL217482	Late Relapse Multiple Myeloma	-0.27859	-0.250616	No	Q2	-2.69814	-0.819134	MF	0	0	0	69	1145	1	NA	NA	NA	NA	NA	NA	NA	NA	NA	2	NA	NA	NA	NA	NA	NA	NA	NA	NA	NA	0	0	0	0	0	0	0	0	0	0	0	0	0	0	0
SL217483	Newly Diagnosed Multiple Myeloma	-0.199116	-0.218209	No	Q2	-0.930151	-0.550371	CD2	1	NA	1	61	2200	0	NA	NA	2186	0	NA	NA	NA	NA	NA	1	1	1	0	0	0	0	0	1	0	0	0	0	0	0	0	0	0	0	0	0	0	0	0	0	0
SL217484	Newly Diagnosed Multiple Myeloma	-0.334642	0.0472218	No	Q1	-2.08455	-0.192931	MF	0	0	0	58	2779	0	NA	NA	1449	1	NA	NA	NA	NA	NA	1	NA	NA	NA	NA	NA	NA	NA	NA	NA	NA	0	0	0	0	0	0	0	0	0	0	0	0	0	0	0
SL217487	Late Relapse Multiple Myeloma	0.169867	-0.226043	Yes	Q3	-0.0340356	-0.251998	PR	0	0	0	62	12	1	NA	NA	NA	NA	NA	NA	NA	NA	NA	3	3	0	0	1	0	1	0	1	1	0	0	0	0	0	0	0	0	0	0	0	0	0	0	0	0
SL217488	Late Relapse Multiple Myeloma	-0.0318914	-0.311037	No	Q2	-0.465789	-0.465477	CD2	0	1	0	66	211	1	NA	NA	NA	NA	NA	NA	NA	NA	NA	2	2	0	0	0	0	1	0	0	0	0	0	0	0	0	0	0	0	0	0	0	0	0	0	0	0
SL217489	Late Relapse Multiple Myeloma	0.0488385	-0.235232	Yes	Q3	0.113303	-0.164968	MS	0	0	0	69	301	1	NA	NA	NA	NA	NA	NA	NA	NA	NA	3	3	0	0	1	0	1	0	1	1	0	0	0	0	0	0	0	0	0	0	0	0	0	0	0	0
SL217490	Newly Diagnosed Multiple Myeloma	-0.14713	-0.430284	No	Q2	-0.607586	-0.538516	MS	1	0	0	67	392	1	NA	NA	82	1	NA	NA	NA	NA	NA	NA	NA	0	0	1	0	1	0	1	1	0	0	0	0	0	0	0	0	0	0	0	0	0	0	0	0
SL217491	Newly Diagnosed Multiple Myeloma	-0.0333579	-0.406927	No	Q2	-0.110569	-0.431516	LB	0	0	0	73	2557	1	NA	NA	833	1	NA	NA	NA	NA	NA	1	2	0	0	0	0	0	0	1	0	0	0	0	0	0	0	0	0	0	0	0	0	0	0	0	0
SL217492	Newly Diagnosed Multiple Myeloma	0.0593535	-0.428576	Yes	Q3	-0.77713	-1.30585	PR	1	0	0	62	1866	1	NA	NA	1012	1	NA	NA	NA	NA	NA	2	2	0	0	0	0	0	1	1	1	0	0	0	0	0	0	0	0	0	0	0	0	0	0	0	1
SL217493	Smoldering Multiple Myeloma	-0.114849	-0.493275	No	Q2	-0.815465	-1.10428	LB	0	0	0	84	1545	1	84	0	NA	NA	1	1	1	3	3	NA	NA	0	0	0	0	1	0	1	0	0	0	0	0	0	0	1	0	0	0	0	0	0	0	0	0
SL217494	Late Relapse Multiple Myeloma	-0.0435696	-0.0331558	No	Q2	-0.109753	0.0854154	PR	0	0	0	76	98	1	NA	NA	NA	NA	NA	NA	NA	NA	NA	1	2	0	0	0	0	0	0	0	0	0	0	0	0	0	0	0	0	0	0	0	0	0	0	0	0
SL217495	Newly Diagnosed Multiple Myeloma	0.136904	-0.224053	Yes	Q3	-0.0237874	-0.480517	CD1	0	0	0	47	791	1	NA	NA	434	1	NA	NA	NA	NA	NA	2	2	1	0	0	0	1	1	0	1	0	0	0	0	0	0	0	0	0	0	0	0	0	0	0	0
SL217496	Early Relapse Multiple Myeloma	-0.316005	-0.0802329	No	Q2	-0.66811	0.164868	MF	0	0	0	65	1342	0	NA	NA	NA	NA	NA	NA	NA	NA	NA	1	2	0	0	0	0	0	1	0	0	0	0	0	0	0	0	0	0	0	0	0	0	0	0	0	0
SL217497	Newly Diagnosed Multiple Myeloma	0.0104524	-0.357926	Yes	Q3	-0.29089	-0.519614	MS	0	0	0	62	735	1	NA	NA	360	1	NA	NA	NA	NA	NA	2	2	0	0	1	0	1	0	1	1	0	0	0	0	0	0	0	0	0	0	0	0	0	0	0	0
SL217498	Early Relapse Multiple Myeloma	0.111532	-0.147761	Yes	Q3	0.240153	-0.00213672	MS	0	0	0	64	39	1	NA	NA	NA	NA	NA	NA	NA	NA	NA	1	2	0	0	1	0	1	0	1	1	0	0	0	0	0	0	0	0	0	0	0	0	0	0	0	0
SL217499	Early Relapse Multiple Myeloma	-0.249507	-0.144392	No	Q2	-0.469143	-0.161366	HY	0	0	0	67	1569	0	NA	NA	NA	NA	NA	NA	NA	NA	NA	NA	NA	0	0	0	0	0	0	0	0	0	0	0	0	0	0	0	0	0	0	0	0	0	0	0	0
SL217500	Late Relapse Multiple Myeloma	0.166903	-0.0416902	Yes	Q3	-0.150093	-0.88718	HY	1	1	0	56	1748	0	NA	NA	NA	NA	NA	NA	NA	NA	NA	2	2	0	0	0	0	0	0	1	0	0	0	0	0	0	0	0	0	0	0	0	0	0	0	0	0
SL217501	Late Relapse Multiple Myeloma	0.168911	-0.200735	Yes	Q3	0.185912	-0.142682	PR	0	1	0	59	219	1	NA	NA	NA	NA	NA	NA	NA	NA	NA	2	2	0	0	0	0	1	1	1	1	0	0	0	0	0	1	0	0	0	0	0	0	0	0	0	0
SL217502	Late Relapse Multiple Myeloma	-0.0527583	-0.278464	No	Q2	-0.372394	-0.339154	CD2	0	0	0	76	1132	1	NA	NA	NA	NA	NA	NA	NA	NA	NA	2	2	0	0	0	0	0	0	1	0	0	0	0	0	0	0	0	0	0	0	0	0	0	0	0	0
SL217503	Newly Diagnosed Multiple Myeloma	0.257681	-0.0813025	Yes	Q3	0.301466	-0.36871	PR	1	0	0	81	1232	1	NA	NA	287	1	NA	NA	NA	NA	NA	3	3	0	1	0	1	1	0	1	1	0	0	0	0	0	0	0	0	0	0	0	0	0	0	0	0
SL217504	Early Relapse Multiple Myeloma	-0.336187	0.0814034	No	Q1	-0.75814	0.460111	MF	1	0	0	65	61	1	NA	NA	NA	NA	NA	NA	NA	NA	NA	3	3	0	0	0	0	0	0	0	0	0	0	0	0	0	0	1	0	0	0	0	0	0	0	0	1
SL217505	Early Relapse Multiple Myeloma	-0.283252	-0.246876	No	Q2	-0.637739	-0.254626	CD2	0	0	0	59	1073	1	NA	NA	NA	NA	NA	NA	NA	NA	NA	1	1	0	0	0	0	1	0	0	0	0	0	0	0	0	0	0	0	0	0	0	0	0	0	0	0
SL217506	Newly Diagnosed Multiple Myeloma	-0.0748617	-0.44601	No	Q2	-0.393	-0.602352	HY	0	0	0	71	2603	0	NA	NA	2603	0	NA	NA	NA	NA	NA	1	2	0	0	0	0	0	0	0	0	0	0	0	0	0	0	0	0	0	0	0	0	0	0	0	0
SL217507	Early Relapse Multiple Myeloma	-0.383175	0.0959611	No	Q1	-0.722859	0.778059	MF	0	0	1	50	1606	0	NA	NA	NA	NA	NA	NA	NA	NA	NA	1	1	0	0	0	0	0	0	0	0	0	0	0	0	0	0	0	0	0	1	0	0	0	0	0	0
SL217509	Newly Diagnosed Multiple Myeloma	0.141737	-0.436234	Yes	Q3	-0.224966	-0.79578	LB	0	0	0	74	1119	1	NA	NA	1860	1	NA	NA	NA	NA	NA	2	2	0	0	0	0	0	0	1	0	0	0	0	0	0	0	0	0	0	0	0	0	0	0	0	0
SL217510	Newly Diagnosed Multiple Myeloma	-0.0481175	-0.371287	No	Q2	-0.156279	-0.38962	HY	1	0	0	48	2740	0	NA	NA	2710	0	NA	NA	NA	NA	NA	1	2	0	0	0	0	0	0	0	0	0	0	0	0	0	0	0	0	0	0	0	0	0	0	0	0
SL218329	Newly Diagnosed Multiple Myeloma	0.244072	-0.162521	Yes	Q3	0.0832749	-0.0403934	PR	1	1	0	68	576	1	NA	NA	162	1	NA	NA	NA	NA	NA	1	2	0	1	0	0	1	0	0	0	0	1	0	0	0	0	0	0	0	0	0	0	0	0	1	0
SL218330	Newly Diagnosed Multiple Myeloma	-0.0643408	-0.211012	No	Q2	-0.805288	-0.752491	LB	0	0	0	50	394	1	NA	NA	126	1	NA	NA	NA	NA	NA	1	2	0	0	0	0	0	1	0	0	0	0	0	0	0	0	0	0	0	0	0	0	0	0	0	0
SL218331	Newly Diagnosed Multiple Myeloma	-0.0496398	-0.310236	No	Q2	0.044104	-0.335926	CD2	0	0	0	66	1263	1	NA	NA	758	1	NA	NA	NA	NA	NA	3	3	0	0	0	0	1	0	0	0	0	0	0	0	0	0	0	0	0	0	0	0	0	0	0	0
SL218333	Newly Diagnosed Multiple Myeloma	-0.0961151	-0.362999	No	Q2	-0.84616	-0.61083	CD2	0	0	1	47	2929	0	NA	NA	712	1	NA	NA	NA	NA	NA	2	2	1	0	0	0	0	0	0	0	0	0	0	0	0	0	0	0	0	1	0	0	0	0	0	0
SL218334	Early Relapse Multiple Myeloma	0.00547186	-0.258942	Yes	Q3	-0.761061	-0.799843	HY	0	0	0	64	1387	1	NA	NA	NA	NA	NA	NA	NA	NA	NA	1	2	0	0	0	0	1	0	0	0	0	0	0	0	0	0	0	0	0	0	0	0	0	0	0	0
SL218341	Newly Diagnosed Multiple Myeloma	-0.0161779	-0.315471	No	Q2	-0.0504701	-0.267792	HY	0	0	0	54	2779	0	NA	NA	1351	1	NA	NA	NA	NA	NA	1	2	1	0	0	0	0	0	0	0	0	0	0	0	0	0	0	0	0	0	0	0	0	0	0	0
SL218342	Newly Diagnosed Multiple Myeloma	-0.215256	-0.316712	No	Q2	-1.08595	-0.48652	HY	0	0	0	79	1846	0	NA	NA	1577	0	NA	NA	NA	NA	NA	2	2	0	0	0	0	0	0	0	0	0	0	0	0	0	0	0	0	0	0	0	0	0	0	1	0
SL218344	Newly Diagnosed Multiple Myeloma	-0.0380343	-0.409278	No	Q2	-0.611352	-0.747589	HY	1	0	0	65	2142	0	NA	NA	2123	0	NA	NA	NA	NA	NA	1	1	0	0	0	0	1	0	1	0	0	0	0	0	0	0	0	0	0	1	0	0	0	0	0	0
SL218345	Early Relapse Multiple Myeloma	-0.142369	-0.105111	No	Q2	-2.06527	-1.01154	MF	0	NA	1	54	1229	1	NA	NA	NA	NA	NA	NA	NA	NA	NA	1	2	0	0	0	0	0	0	1	0	0	0	0	0	0	1	0	0	0	0	0	0	0	0	0	0
SL218355	Newly Diagnosed Multiple Myeloma	-0.11516	-0.344922	No	Q2	-1.16519	-0.928154	LB	0	0	0	59	2121	0	NA	NA	579	1	NA	NA	NA	NA	NA	1	1	0	0	0	0	1	0	1	0	0	0	0	0	0	0	0	0	0	1	0	0	0	0	0	0
SL218356	Newly Diagnosed Multiple Myeloma	-0.2599	-0.215931	No	Q2	-0.591987	-0.234172	HY	1	0	0	68	1405	0	NA	NA	1407	0	NA	NA	NA	NA	NA	2	2	0	0	0	0	0	0	0	0	0	0	0	0	0	0	0	0	0	0	0	0	0	0	0	0
SL218357	Early Relapse Multiple Myeloma	-0.115091	0.224827	No	Q1	-0.0354007	0.630718	PR	1	NA	0	65	117	1	NA	NA	NA	NA	NA	NA	NA	NA	NA	3	3	0	0	0	0	0	0	0	0	0	0	0	0	0	0	0	0	0	0	0	0	0	0	0	0
SL218358	Early Relapse Multiple Myeloma	-0.281127	0.0483873	No	Q1	-0.405162	0.801563	MF	0	0	0	62	1330	0	NA	NA	NA	NA	NA	NA	NA	NA	NA	1	1	0	0	0	0	0	0	0	0	0	0	0	0	0	0	0	0	0	0	0	0	1	0	0	0
SL218359	Late Relapse Multiple Myeloma	0.0449265	-0.160303	Yes	Q3	-0.0167138	-0.223595	MS	0	0	0	53	215	1	NA	NA	NA	NA	NA	NA	NA	NA	NA	2	2	0	0	1	0	1	1	0	1	1	0	0	0	0	0	0	0	0	0	0	0	0	0	0	0
SL218366	Newly Diagnosed Multiple Myeloma	-0.310419	-0.137007	No	Q2	-0.187173	0.0964017	HY	0	0	0	64	1645	0	NA	NA	2101	0	NA	NA	NA	NA	NA	2	2	0	0	0	0	0	0	0	0	0	0	0	0	0	0	0	0	0	0	0	0	0	0	0	0
SL218367	Newly Diagnosed Multiple Myeloma	-0.0966117	-0.37082	No	Q2	-0.133766	-0.0900331	LB	1	0	0	72	1284	0	NA	NA	437	1	NA	NA	NA	NA	NA	1	1	0	0	0	1	1	0	0	0	0	0	0	0	0	0	0	0	0	0	0	0	0	0	0	0
SL218368	Newly Diagnosed Multiple Myeloma	-0.313927	-0.323555	No	Q2	-0.47574	-0.203264	HY	0	0	1	71	1210	0	NA	NA	1203	0	NA	NA	NA	NA	NA	1	1	0	0	0	0	0	0	0	0	0	0	0	0	0	0	0	0	0	0	0	0	0	0	0	0
SL218369	Newly Diagnosed Multiple Myeloma	-0.433851	-0.199942	No	Q2	-0.315874	0.383107	CD2	0	0	0	67	370	0	NA	NA	346	0	NA	NA	NA	NA	NA	2	2	1	0	0	0	0	0	0	0	0	0	0	0	0	0	0	0	0	0	0	0	0	0	0	0
SL219799	Smoldering Multiple Myeloma	-0.40496	-0.259494	No	Q2	-2.03371	-0.273369	MF	0	0	0	86	201	1	201	0	NA	NA	0	0	0	NA	1	NA	NA	1	0	0	0	1	0	0	0	0	0	0	0	0	0	0	0	0	0	0	0	0	0	0	0
SL219800	Early Relapse Multiple Myeloma	-0.173935	-0.196215	No	Q2	-3.45732	-1.27001	PR	0	0	0	72	130	1	NA	NA	NA	NA	NA	NA	NA	NA	NA	2	2	0	0	0	0	0	0	0	0	0	0	0	0	0	0	0	0	0	0	0	0	0	0	0	0
SL219801	Newly Diagnosed Multiple Myeloma	-0.185171	-0.384257	No	Q2	-1.70546	-1.08662	LB	0	0	0	74	1306	1	NA	NA	1272	1	NA	NA	NA	NA	NA	2	2	0	0	0	0	0	0	0	0	0	0	0	0	0	0	0	0	0	0	0	0	0	0	0	0
SL219802	Newly Diagnosed Multiple Myeloma	-0.253908	-0.174824	No	Q2	-1.51843	-0.818012	MF	0	0	0	55	56	1	NA	NA	44	1	NA	NA	NA	NA	NA	1	1	1	0	0	0	1	0	1	0	0	0	0	0	0	0	0	0	0	0	0	0	0	0	0	1
SL219804	Newly Diagnosed Multiple Myeloma	-0.0804248	-0.143564	No	Q2	-1.94552	-1.16971	CD2	0	0	0	53	2321	0	NA	NA	2278	0	NA	NA	NA	NA	NA	1	2	0	0	0	0	1	1	0	0	0	0	0	0	0	0	0	0	0	0	0	0	0	0	0	0
SL219805	Early Relapse Multiple Myeloma	-0.236329	-0.0101732	No	Q2	-4.33922	-0.83504	MF	0	0	0	51	2327	0	NA	NA	NA	NA	NA	NA	NA	NA	NA	1	1	0	0	0	0	0	0	0	0	0	0	0	0	0	0	0	0	0	0	0	0	0	0	0	0
SL219806	Newly Diagnosed Multiple Myeloma	-0.105296	-0.102378	No	Q2	-0.754618	0.149989	PR	0	0	0	63	2092	0	NA	NA	908	1	NA	NA	NA	NA	NA	1	2	0	0	0	0	0	0	0	0	0	0	0	0	0	0	0	0	0	0	0	0	0	0	0	0
SL219808	Newly Diagnosed Multiple Myeloma	-0.236829	-0.214626	No	Q2	-1.56106	0.681622	MF	0	0	0	51	2086	0	NA	NA	340	1	NA	NA	NA	NA	NA	1	2	0	0	0	0	1	0	0	0	0	0	0	0	0	0	0	0	0	0	0	0	0	0	0	0
SL219809	Newly Diagnosed Multiple Myeloma	0.111972	-0.100882	Yes	Q3	-0.0247591	-0.305819	LB	0	0	1	44	2152	0	NA	NA	1132	1	NA	NA	NA	NA	NA	2	2	0	0	0	0	0	0	0	0	0	0	0	0	0	0	0	0	0	0	0	0	0	0	0	0
SL219810	Newly Diagnosed Multiple Myeloma	-0.0321566	-0.228386	No	Q2	-0.709509	-0.0931408	CD2	0	0	0	75	2071	0	NA	NA	532	1	NA	NA	NA	NA	NA	1	1	0	0	0	0	0	0	0	0	0	0	0	0	0	0	0	0	0	0	0	0	0	0	0	0
SL219811	Newly Diagnosed Multiple Myeloma	-0.0247768	-0.304315	No	Q2	-1.16835	-0.864884	HY	0	0	0	66	2081	1	NA	NA	1465	1	NA	NA	NA	NA	NA	1	2	0	0	0	0	1	0	0	0	0	0	0	0	0	0	0	0	0	0	0	0	0	0	0	0
SL219812	Smoldering Multiple Myeloma	-0.17876	-0.121167	No	Q2	-1.54803	-0.0716541	MF	0	0	0	54	1956	1	577	1	NA	NA	0	0	0	1	1	NA	NA	0	0	0	0	0	0	0	0	0	0	0	0	0	0	0	0	0	0	0	0	0	0	0	0
SL219813	Newly Diagnosed Multiple Myeloma	-0.135441	-0.24995	No	Q2	-4.08122	-1.92421	CD2	0	0	0	48	3083	0	NA	NA	189	1	NA	NA	NA	NA	NA	1	2	1	0	0	0	0	0	0	0	0	0	0	0	0	0	0	0	0	0	0	0	0	0	0	0
SL219814	Newly Diagnosed Multiple Myeloma	-0.153544	-0.125761	No	Q2	-3.66455	-1.22746	MF	1	0	0	75	1558	0	NA	NA	1538	0	NA	NA	NA	NA	NA	1	1	1	0	0	0	1	0	0	0	0	0	0	0	0	0	0	0	0	0	0	0	0	0	0	0
SL219815	Newly Diagnosed Multiple Myeloma	-0.230622	-0.0519429	No	Q2	-2.08915	-0.528084	MF	0	0	1	64	1994	0	NA	NA	1067	1	NA	NA	NA	NA	NA	1	1	0	0	0	0	0	0	0	0	0	0	0	0	0	0	0	0	0	0	0	0	0	0	0	0
SL219817	Newly Diagnosed Multiple Myeloma	-0.0110193	-0.356943	No	Q2	-0.502779	-0.606358	HY	0	0	0	62	817	1	NA	NA	817	1	NA	NA	NA	NA	NA	2	2	0	0	0	0	0	1	0	0	0	0	0	0	0	0	0	0	0	0	0	0	0	0	0	0
SL219818	Early Relapse Multiple Myeloma	-0.1545	-0.166767	No	Q2	-1.11194	-0.031321	LB	1	0	0	68	292	1	NA	NA	NA	NA	NA	NA	NA	NA	NA	2	2	0	0	0	0	0	0	1	0	0	0	0	0	0	0	0	0	0	0	0	0	0	0	0	0
SL219819	Smoldering Multiple Myeloma	0.0802347	-0.371544	Yes	Q3	-0.225066	-0.70186	HY	0	0	0	62	2434	0	190	1	NA	NA	1	1	1	3	3	NA	NA	0	0	0	0	0	1	0	0	0	0	0	0	0	0	0	0	0	0	0	0	0	0	0	0
SL219820	Newly Diagnosed Multiple Myeloma	0.148313	-0.301432	Yes	Q3	-0.134417	-0.824693	HY	0	0	0	62	2244	0	NA	NA	908	1	NA	NA	NA	NA	NA	1	2	0	0	0	0	0	1	0	0	0	0	0	0	0	0	0	0	0	0	0	0	0	0	0	0
SL233334	Smoldering Multiple Myeloma	-0.166627	-0.320758	No	Q2	-0.333031	0.0780685	LB	1	0	0	53	2723	0	3883	0	NA	NA	1	1	1	2	3	NA	NA	0	0	0	0	0	0	1	0	0	0	0	0	0	0	0	0	0	0	0	0	0	0	0	0
SL233335	Late Relapse Multiple Myeloma	-0.0957718	-0.220967	No	Q2	-0.717597	0.188499	CD2	0	1	0	49	2688	0	NA	NA	NA	NA	NA	NA	NA	NA	NA	NA	NA	0	0	0	0	0	0	0	0	0	0	0	0	0	0	0	0	0	0	0	0	0	0	0	0
SL233336	MGUS	-0.154566	-0.267624	No	Q2	-0.751446	0.230568	CD2	1	1	0	50	2141	0	NA	NA	NA	NA	NA	NA	NA	NA	NA	NA	NA	0	0	0	0	0	1	0	0	0	0	0	0	0	0	0	0	0	0	0	0	0	0	0	0
SL233338	Early Relapse Multiple Myeloma	-0.242	0.123543	No	Q1	-0.266001	0.932102	MF	1	0	0	30	185	1	NA	NA	NA	NA	NA	NA	NA	NA	NA	1	2	0	0	0	0	0	0	0	0	0	0	0	0	0	0	0	0	0	0	0	0	0	0	0	0
SL233339	Smoldering Multiple Myeloma	-0.210167	-0.410699	No	Q2	-1.28781	-0.55812	LB	0	0	0	50	2404	0	3467	0	NA	NA	0	0	0	2	1	NA	NA	0	0	0	0	1	0	0	0	0	0	0	0	0	0	0	0	0	0	0	0	0	0	0	0
SL233340	MGUS	-0.230381	-0.121258	No	Q2	-1.30348	0.180597	MF	1	0	0	62	2139	0	NA	NA	NA	NA	NA	NA	NA	NA	NA	NA	NA	0	0	0	0	0	0	0	0	0	0	0	0	0	0	0	0	0	0	0	0	0	0	0	0
SL233341	Early Relapse Multiple Myeloma	-0.0663092	-0.11611	No	Q2	-0.206046	0.212698	CD1	1	0	0	74	157	1	NA	NA	NA	NA	NA	NA	NA	NA	NA	3	NA	0	0	0	0	1	0	1	0	0	0	0	0	0	0	0	0	0	0	0	0	0	0	0	0
SL233346	Late Relapse Multiple Myeloma	0.059634	-0.106525	Yes	Q3	0.0334058	-0.239139	CD2	0	0	1	70	154	0	NA	NA	NA	NA	NA	NA	NA	NA	NA	3	NA	0	0	0	0	1	0	1	0	0	0	0	0	0	0	0	0	0	0	0	0	0	0	0	0
SL233347	Early Relapse Multiple Myeloma	0.052869	-0.155911	Yes	Q3	0.071807	0.157296	PR	1	0	0	62	573	1	NA	NA	NA	NA	NA	NA	NA	NA	NA	NA	NA	0	0	0	0	1	1	0	0	0	0	0	0	0	0	0	0	0	0	0	0	0	0	0	0
SL233348	Early Relapse Multiple Myeloma	-0.0588331	0.097674	No	Q1	0.0256076	-0.0334227	HY	0	0	0	60	1819	1	NA	NA	NA	NA	NA	NA	NA	NA	NA	3	NA	0	0	0	0	1	0	0	0	0	0	0	0	0	1	0	0	0	0	1	0	0	0	0	0
SL233349	Late Relapse Multiple Myeloma	-0.0633799	-0.292206	No	Q2	-0.202103	-0.00354312	CD2	1	0	0	57	930	1	NA	NA	NA	NA	NA	NA	NA	NA	NA	1	2	1	0	0	0	1	0	1	0	0	0	0	1	0	1	0	0	0	0	0	0	0	0	0	0
SL233350	Late Relapse Multiple Myeloma	0.145212	-0.0625344	Yes	Q3	-0.257893	-0.325502	HY	1	1	0	53	2520	0	NA	NA	NA	NA	NA	NA	NA	NA	NA	1	2	0	0	0	0	0	0	1	0	0	0	0	0	0	0	0	0	0	0	0	0	0	0	0	0
SL233351	Smoldering Multiple Myeloma	-0.112225	-0.202949	No	Q2	-0.982768	-0.488043	LB	1	0	0	60	2456	0	1280	1	NA	NA	0	0	1	1	2	NA	NA	0	0	0	0	0	0	0	0	0	0	0	0	0	0	0	0	0	0	0	0	0	0	0	0
SL233352	Early Relapse Multiple Myeloma	-0.224519	-0.190713	No	Q2	-0.855381	0.160809	CD2	0	0	0	78	2012	0	NA	NA	NA	NA	NA	NA	NA	NA	NA	3	3	1	0	0	0	0	0	0	0	0	0	0	0	0	0	0	0	0	0	0	0	0	0	0	0
SL233353	MGUS	-0.259986	0.0228243	No	Q1	-0.980616	0.619199	MF	1	0	0	77	1665	1	NA	NA	NA	NA	NA	NA	NA	NA	NA	NA	NA	NA	NA	NA	NA	NA	NA	NA	NA	NA	0	0	0	0	0	0	0	0	0	0	0	0	0	0	0
SL233354	MGUS	-0.25639	-0.170376	No	Q2	-0.703853	0.657791	MF	0	0	0	70	17	0	NA	NA	NA	NA	NA	NA	NA	NA	NA	NA	NA	0	0	0	0	0	0	0	0	0	0	0	0	0	0	0	0	0	0	0	0	0	0	0	0
SL233355	MGUS	-0.283048	-0.116849	No	Q2	-0.761514	0.698055	MF	0	NA	0	68	2271	0	NA	NA	NA	NA	NA	NA	NA	NA	NA	NA	NA	1	0	0	0	0	0	0	0	0	0	0	0	0	0	0	0	0	0	0	0	0	0	0	0
SL233356	MGUS	-0.275725	-0.276548	No	Q2	-1.08108	0.344629	MF	0	0	0	78	1795	0	NA	NA	NA	NA	NA	NA	NA	NA	NA	NA	NA	0	0	0	0	0	0	0	0	0	0	0	0	0	0	0	0	0	0	0	0	0	0	0	0
SL233357	MGUS	-0.204858	-0.25824	No	Q2	-0.448939	0.166129	MF	0	0	0	74	33	0	NA	NA	NA	NA	NA	NA	NA	NA	NA	NA	NA	0	0	0	0	0	0	0	0	0	0	0	0	0	0	0	0	0	0	0	0	0	0	0	0
SL233358	Early Relapse Multiple Myeloma	0.0479522	-0.099067	Yes	Q3	0.0912965	-0.463846	MS	0	0	0	66	1368	1	NA	NA	NA	NA	NA	NA	NA	NA	NA	1	2	0	0	1	0	1	1	1	1	1	0	0	0	0	0	0	0	0	0	0	0	0	0	0	0
SL233359	Smoldering Multiple Myeloma	-0.0269152	-0.0141325	No	Q2	0.154312	-0.0979037	LB	1	0	0	65	2881	0	17	0	NA	NA	1	0	0	1	2	NA	NA	0	0	0	0	0	0	1	0	0	0	0	0	0	0	0	0	0	0	0	0	0	0	0	0
SL233360	Early Relapse Multiple Myeloma	-0.105033	-0.0238261	No	Q2	-0.402929	-0.524956	HY	0	0	0	58	1655	1	NA	NA	NA	NA	NA	NA	NA	NA	NA	1	2	0	0	0	0	0	0	0	0	0	0	0	0	0	0	0	0	0	0	0	0	0	0	0	0
SL233361	Late Relapse Multiple Myeloma	-0.143744	0.00198969	No	Q1	-0.127811	-0.240414	HY	0	0	0	65	855	1	NA	NA	NA	NA	NA	NA	NA	NA	NA	2	2	0	0	0	0	1	0	0	0	0	0	0	0	0	0	0	0	0	0	0	0	0	0	0	0
SL233362	Smoldering Multiple Myeloma	-0.079918	-0.0943247	No	Q2	0.0196304	-0.188644	MS	1	0	0	56	2324	0	3461	1	NA	NA	1	0	1	2	3	NA	NA	0	0	0	0	1	0	0	0	0	0	0	0	0	0	0	0	0	0	0	0	0	0	0	0
SL233363	Late Relapse Multiple Myeloma	0.0812657	0.0435832	Yes	Q4	0.482559	0.053658	MS	1	1	0	68	194	1	NA	NA	NA	NA	NA	NA	NA	NA	NA	3	3	0	0	1	0	1	0	0	0	0	0	0	0	0	0	0	0	0	0	0	0	0	0	0	0
SL233364	Late Relapse Multiple Myeloma	0.037714	-0.136694	Yes	Q3	-0.0375782	-0.414312	LB	1	0	0	68	1383	1	NA	NA	NA	NA	NA	NA	NA	NA	NA	1	2	0	0	0	0	0	0	1	0	0	0	0	0	0	0	0	0	0	1	0	0	0	0	0	1
SL233365	Newly Diagnosed Multiple Myeloma	-0.0254787	-0.109718	No	Q2	-0.171603	-0.604579	HY	1	0	0	66	2198	0	NA	NA	1118	1	NA	NA	NA	NA	NA	NA	NA	0	0	0	0	0	0	0	0	0	0	0	0	0	0	0	0	0	1	0	0	0	0	0	0
SL233366	Late Relapse Multiple Myeloma	0.0527814	0.0120787	Yes	Q4	0.200384	-0.021707	MS	0	0	0	51	792	1	NA	NA	NA	NA	NA	NA	NA	NA	NA	NA	NA	NA	NA	NA	NA	NA	NA	NA	NA	NA	0	0	0	0	0	0	0	0	0	0	0	0	0	0	0
SL233370	Early Relapse Multiple Myeloma	0.0726584	-0.0334511	Yes	Q3	-0.0359885	-0.52582	MS	1	1	0	68	530	1	NA	NA	NA	NA	NA	NA	NA	NA	NA	1	2	0	0	1	0	1	0	1	1	0	0	0	0	0	0	0	0	0	0	0	0	0	0	0	0
SL233371	Late Relapse Multiple Myeloma	0.0724872	-0.0216801	Yes	Q3	0.0564394	-0.35294	CD2	1	0	0	73	667	1	NA	NA	NA	NA	NA	NA	NA	NA	NA	1	2	0	0	0	0	1	1	1	1	0	0	0	0	0	0	0	0	0	0	0	1	0	0	0	0
SL233372	Late Relapse Multiple Myeloma	0.106432	0.0347883	Yes	Q4	0.307051	-0.393565	MS	0	0	0	59	234	1	NA	NA	NA	NA	NA	NA	NA	NA	NA	3	3	0	0	0	0	1	0	0	0	0	0	0	0	0	0	0	0	0	0	0	0	0	0	0	0
SL233373	Late Relapse Multiple Myeloma	0.0869284	-0.0320875	Yes	Q3	0.0973095	-0.37959	CD2	0	0	0	62	1127	1	NA	NA	NA	NA	NA	NA	NA	NA	NA	NA	NA	1	0	0	0	1	0	0	0	0	0	1	0	0	0	0	0	0	1	0	0	0	0	0	0
SL233374	Early Relapse Multiple Myeloma	0.20102	0.0452213	Yes	Q4	0.155832	-0.370636	MS	0	0	0	71	113	1	NA	NA	NA	NA	NA	NA	NA	NA	NA	3	3	0	0	1	0	1	0	1	1	0	0	0	0	0	0	0	0	0	0	0	0	0	0	0	0
SL233375	Late Relapse Multiple Myeloma	-0.0175405	-0.0782708	No	Q2	-0.344608	-0.606714	MS	0	1	0	66	1569	1	NA	NA	NA	NA	NA	NA	NA	NA	NA	NA	NA	0	0	1	0	0	0	1	1	0	0	0	1	1	0	0	0	0	0	0	0	0	0	0	0
SL233376	Late Relapse Multiple Myeloma	0.155154	0.0299012	Yes	Q4	0.473725	-0.409213	MS	1	0	0	60	697	1	NA	NA	NA	NA	NA	NA	NA	NA	NA	1	2	0	0	1	0	1	1	1	1	1	0	0	1	0	0	0	0	0	0	0	0	0	0	0	0
SL233377	Early Relapse Multiple Myeloma	0.00385169	0.0477591	Yes	Q4	0.528902	0.453638	LB	0	0	0	55	1120	1	NA	NA	NA	NA	NA	NA	NA	NA	NA	NA	NA	NA	NA	NA	NA	NA	NA	NA	NA	NA	0	0	0	0	1	0	0	0	0	0	0	0	0	0	0
SL233378	Early Relapse Multiple Myeloma	0.249793	0.110483	Yes	Q4	0.364907	-0.434927	MS	1	0	0	73	30	1	NA	NA	NA	NA	NA	NA	NA	NA	NA	3	3	0	0	1	0	1	1	0	1	0	0	0	0	0	0	0	0	0	1	0	0	0	0	0	0
SL233379	Late Relapse Multiple Myeloma	0.0750821	-0.0730589	Yes	Q3	-0.573127	-1.16613	CD2	1	NA	1	48	864	1	NA	NA	NA	NA	NA	NA	NA	NA	NA	2	2	1	0	0	0	0	0	1	0	0	0	0	0	0	0	0	0	0	0	0	1	0	0	0	0
SL233380	Late Relapse Multiple Myeloma	0.392334	0.133827	Yes	Q4	0.806396	-0.448572	HY	0	1	0	58	740	1	NA	NA	NA	NA	NA	NA	NA	NA	NA	1	2	0	0	0	0	0	0	0	0	0	0	0	0	0	1	0	0	0	0	0	0	0	0	0	0
SL233381	Late Relapse Multiple Myeloma	0.0579096	-0.14045	Yes	Q3	-0.160289	-0.393659	PR	0	NA	1	55	838	1	NA	NA	NA	NA	NA	NA	NA	NA	NA	1	2	0	0	0	0	0	0	1	0	0	0	0	0	0	0	0	0	0	0	0	0	0	0	0	0
SL235833	MGUS	-0.22502	0.0386038	No	Q1	-1.00771	0.219239	MF	0	0	0	61	2416	0	NA	NA	NA	NA	NA	NA	NA	NA	NA	NA	NA	0	0	0	0	0	0	0	0	0	0	0	0	0	0	0	0	0	0	0	0	0	0	0	0
SL235834	Early Relapse Multiple Myeloma	-0.0293819	-0.0625475	No	Q2	-0.674051	-0.123162	HY	1	0	0	64	2250	0	NA	NA	NA	NA	NA	NA	NA	NA	NA	NA	NA	0	0	0	0	0	0	0	0	0	0	0	0	0	0	0	0	0	0	0	0	0	0	0	0
SL235835	MGUS	-0.221857	-0.214636	No	Q2	-1.2846	0.0700934	CD2	0	0	1	69	1910	0	NA	NA	NA	NA	NA	NA	NA	NA	NA	NA	NA	0	0	0	0	0	0	0	0	0	0	0	0	0	0	0	0	0	0	0	0	0	0	0	0
SL235836	Smoldering Multiple Myeloma	-0.165028	-0.34187	No	Q2	-0.860461	-0.328168	LB	1	0	0	61	2100	0	924	1	NA	NA	0	0	1	1	2	NA	NA	0	0	0	0	0	0	0	0	0	0	0	0	0	0	0	0	0	0	0	0	0	0	0	0
SL235837	Smoldering Multiple Myeloma	-0.305538	-0.135551	No	Q2	-0.913416	0.49625	MF	1	0	0	52	1627	0	2456	0	NA	NA	0	0	0	1	1	NA	NA	0	0	0	0	1	0	1	0	0	0	0	0	0	0	0	0	0	0	0	0	0	0	0	0
SL235838	Early Relapse Multiple Myeloma	-0.0334063	-0.0662096	No	Q2	-0.476107	0.289696	HY	0	0	0	65	701	1	NA	NA	NA	NA	NA	NA	NA	NA	NA	1	NA	NA	NA	NA	NA	NA	NA	NA	NA	NA	0	0	0	0	0	0	0	0	0	0	0	0	0	0	0
SL235839	Newly Diagnosed Multiple Myeloma	-0.0335506	-0.335524	No	Q2	-1.04964	-0.715978	LB	1	1	0	48	2016	0	NA	NA	1806	1	NA	NA	NA	NA	NA	1	1	0	0	0	0	0	0	0	0	0	0	0	0	0	0	0	0	0	0	0	0	0	0	0	0
SL235840	MGUS	-0.19969	-0.193505	No	Q2	-0.868185	0.796057	MF	1	0	0	60	1988	0	NA	NA	NA	NA	NA	NA	NA	NA	NA	NA	NA	NA	NA	NA	NA	NA	NA	NA	NA	NA	0	0	0	0	0	0	0	0	0	0	0	0	0	0	0
SL235841	Early Relapse Multiple Myeloma	-0.238381	-0.156164	No	Q2	-1.24216	0.06154	CD2	0	0	0	66	1966	0	NA	NA	NA	NA	NA	NA	NA	NA	NA	1	1	0	0	0	0	0	0	0	0	0	0	0	0	0	0	0	0	0	0	0	0	0	0	0	0
SL235842	Smoldering Multiple Myeloma	-0.11383	-0.171611	No	Q2	-0.94986	-0.299076	CD1	1	0	0	51	1876	0	3038	0	NA	NA	0	0	0	2	1	NA	NA	0	0	0	0	0	0	0	0	0	0	0	0	0	0	0	0	0	0	0	0	0	0	0	0
SL235843	Smoldering Multiple Myeloma	-0.264883	-0.365662	No	Q2	-0.780693	0.293149	CD2	1	0	0	74	1495	1	1495	0	NA	NA	0	0	1	2	2	NA	NA	0	0	0	0	0	0	0	0	0	0	0	0	0	0	0	0	0	0	0	0	0	0	0	0
SL235844	Early Relapse Multiple Myeloma	-0.207993	-0.197282	No	Q2	-1.48407	-0.20805	CD2	1	0	0	56	1289	1	NA	NA	NA	NA	NA	NA	NA	NA	NA	1	2	0	0	0	0	0	0	0	0	0	0	0	1	0	0	0	0	0	0	0	0	0	0	0	0
SL235845	Early Relapse Multiple Myeloma	-0.084715	-0.077406	No	Q2	-0.163485	0.294347	HY	0	0	0	71	2148	0	NA	NA	NA	NA	NA	NA	NA	NA	NA	2	2	0	0	0	0	0	0	0	0	0	0	0	0	0	0	0	0	0	0	0	0	0	1	0	0
SL235846	Early Relapse Multiple Myeloma	-0.201023	-0.15796	No	Q2	-1.47848	0.177709	MF	0	0	0	64	1249	1	NA	NA	NA	NA	NA	NA	NA	NA	NA	1	1	0	0	0	0	1	0	0	0	0	0	0	0	0	0	0	0	0	0	0	0	0	0	0	0
SL235847	Early Relapse Multiple Myeloma	-0.196912	-0.179608	No	Q2	-0.998793	0.0116298	MS	0	0	0	64	327	1	NA	NA	NA	NA	NA	NA	NA	NA	NA	1	2	0	0	1	0	1	0	1	1	0	0	0	0	0	0	0	0	0	0	0	0	0	0	0	0
SL235848	Early Relapse Multiple Myeloma	-0.35426	-0.0746439	No	Q2	-1.06014	0.380182	MF	0	0	0	72	1973	0	NA	NA	NA	NA	NA	NA	NA	NA	NA	2	2	0	0	0	0	0	0	0	0	0	0	0	0	0	0	0	0	0	0	0	0	0	0	0	0
SL235849	Late Relapse Multiple Myeloma	0.0229503	-0.0745806	Yes	Q3	-1.30875	-0.813177	CD2	1	NA	1	49	430	1	NA	NA	NA	NA	NA	NA	NA	NA	NA	2	NA	1	0	0	0	0	0	1	0	0	0	0	0	0	0	0	0	0	0	0	1	0	0	0	0
SL235850	MGUS	-0.175654	-0.143935	No	Q2	-1.14307	0.458282	MF	1	0	0	60	1276	1	NA	NA	NA	NA	NA	NA	NA	NA	NA	NA	NA	NA	NA	NA	NA	NA	NA	NA	NA	NA	0	0	0	0	0	0	0	0	0	0	0	0	0	0	0
SL235851	MGUS	-0.322354	-0.038796	No	Q2	-0.870167	0.6809	MF	1	0	0	74	1943	0	NA	NA	NA	NA	NA	NA	NA	NA	NA	NA	NA	0	0	0	0	0	0	0	0	0	0	0	0	0	0	0	0	0	0	0	0	0	0	0	0
SL235852	Early Relapse Multiple Myeloma	-0.233055	-0.00632249	No	Q2	-0.807098	0.936289	MF	1	0	0	59	1591	0	NA	NA	NA	NA	NA	NA	NA	NA	NA	1	2	0	0	0	0	0	0	0	0	0	0	0	0	0	0	0	0	0	0	0	0	0	0	0	0
SL235854	Early Relapse Multiple Myeloma	-0.125468	-0.139022	No	Q2	-0.839806	0.045226	CD2	0	0	0	55	79	1	NA	NA	NA	NA	NA	NA	NA	NA	NA	2	2	1	0	0	0	1	0	0	0	0	0	0	0	0	0	0	0	0	0	0	0	0	0	0	0
SL235855	MGUS	-0.276689	-0.106845	No	Q2	-0.806564	0.820191	MF	0	0	0	42	103	0	NA	NA	NA	NA	NA	NA	NA	NA	NA	NA	NA	0	0	0	0	0	0	0	0	0	0	0	0	0	0	0	0	0	0	0	0	0	0	0	0
SL235856	Early Relapse Multiple Myeloma	-0.090206	-0.166597	No	Q2	-0.450132	-0.0842396	CD2	1	0	0	40	1764	0	NA	NA	NA	NA	NA	NA	NA	NA	NA	1	NA	NA	NA	NA	NA	NA	NA	NA	NA	NA	0	0	0	0	0	0	0	0	0	0	0	0	0	0	0
SL235857	Early Relapse Multiple Myeloma	-0.228292	-0.196513	No	Q2	-0.519728	0.325299	MF	0	1	0	71	2164	0	NA	NA	NA	NA	NA	NA	NA	NA	NA	1	1	0	0	0	0	0	0	0	0	0	0	0	0	0	0	0	0	0	0	0	0	0	0	0	0
SL235858	Early Relapse Multiple Myeloma	-0.10562	-0.129197	No	Q2	-0.616234	1.02738	MF	0	0	0	61	1299	1	NA	NA	NA	NA	NA	NA	NA	NA	NA	1	NA	0	0	0	0	0	0	0	0	0	0	0	0	0	0	0	0	0	0	0	0	0	0	0	0
SL235859	Late Relapse Multiple Myeloma	-0.268085	-0.0842743	No	Q2	-1.35142	0.590488	MF	1	1	0	46	115	1	NA	NA	NA	NA	NA	NA	NA	NA	NA	1	2	0	0	0	0	0	0	0	0	0	0	0	0	0	0	0	0	0	0	0	0	0	0	0	0
SL235860	Early Relapse Multiple Myeloma	-0.00735157	-0.245965	No	Q2	-0.152785	-0.345403	HY	0	0	0	66	1843	1	NA	NA	NA	NA	NA	NA	NA	NA	NA	3	2	0	0	0	0	1	0	0	0	0	0	0	0	0	0	0	0	0	0	0	0	0	0	0	0
SL235861	Late Relapse Multiple Myeloma	0.0913588	-0.287595	Yes	Q3	-0.106944	-0.293046	LB	1	0	0	60	93	1	NA	NA	NA	NA	NA	NA	NA	NA	NA	1	1	0	0	0	0	1	0	0	0	0	0	0	0	0	1	0	0	0	0	0	0	0	0	0	0
SL235862	Early Relapse Multiple Myeloma	-0.0691728	-0.238722	No	Q2	-0.311314	-0.205935	HY	0	0	0	76	1897	0	NA	NA	NA	NA	NA	NA	NA	NA	NA	1	1	0	0	0	0	0	0	1	0	0	0	0	0	0	0	0	0	0	0	0	0	0	0	0	0
SL235863	Late Relapse Multiple Myeloma	0.113205	-0.137185	Yes	Q3	-0.0173735	-0.574021	LB	1	0	0	52	472	1	NA	NA	NA	NA	NA	NA	NA	NA	NA	2	NA	NA	NA	NA	NA	NA	NA	NA	NA	NA	0	0	0	0	0	0	0	0	0	0	0	0	0	0	0
SL235864	Late Relapse Multiple Myeloma	0.023965	-0.16101	Yes	Q3	-0.415297	-0.119416	HY	1	1	0	55	2027	0	NA	NA	NA	NA	NA	NA	NA	NA	NA	1	2	0	0	0	0	0	0	1	0	0	0	0	0	0	0	0	0	0	0	0	0	0	0	0	0
SL235865	Newly Diagnosed Multiple Myeloma	0.00552098	-0.178761	Yes	Q3	-0.347492	-0.38249	CD2	0	0	0	77	961	1	NA	NA	731	1	NA	NA	NA	NA	NA	3	2	1	0	0	0	0	0	0	0	0	0	0	0	0	0	0	0	0	0	0	1	0	0	0	0
SL235866	Early Relapse Multiple Myeloma	-0.0592407	-0.170096	No	Q2	-0.438413	-0.155892	HY	0	0	0	67	1724	1	NA	NA	NA	NA	NA	NA	NA	NA	NA	1	1	0	0	0	0	1	0	0	0	0	0	0	0	0	0	0	0	0	0	0	0	0	0	0	0
SL235867	Late Relapse Multiple Myeloma	0.0277738	-0.334275	Yes	Q3	-0.426374	-0.567318	HY	0	0	0	68	1173	1	NA	NA	NA	NA	NA	NA	NA	NA	NA	1	1	0	0	0	0	0	0	0	0	0	0	0	0	0	0	0	0	0	0	0	0	0	0	0	0
SL235868	Early Relapse Multiple Myeloma	0.00398894	0.0131947	Yes	Q4	-0.0415866	-0.129472	HY	0	0	0	61	1859	1	NA	NA	NA	NA	NA	NA	NA	NA	NA	1	NA	NA	NA	NA	NA	NA	NA	NA	NA	NA	0	0	0	0	0	0	0	0	0	0	0	0	0	0	0
SL235869	Early Relapse Multiple Myeloma	0.0507209	-0.125551	Yes	Q3	0.0204761	-0.115539	HY	1	0	0	60	281	1	NA	NA	NA	NA	NA	NA	NA	NA	NA	3	2	0	0	0	0	0	0	0	0	0	0	0	0	0	0	0	0	0	0	0	0	0	0	0	0
SL235870	Early Relapse Multiple Myeloma	0.26221	-0.0859691	Yes	Q3	0.280391	-0.376908	MF	1	0	0	71	1916	0	NA	NA	NA	NA	NA	NA	NA	NA	NA	2	2	0	1	0	0	0	0	0	0	0	0	0	0	0	0	0	0	0	0	0	0	0	0	0	0
SL235871	Late Relapse Multiple Myeloma	0.25347	-0.059755	Yes	Q3	0.277156	-0.573768	PR	1	0	0	50	838	1	NA	NA	NA	NA	NA	NA	NA	NA	NA	1	2	0	0	0	0	1	1	0	0	0	0	0	0	0	0	0	0	0	0	0	0	0	0	0	0
SL235872	Early Relapse Multiple Myeloma	0.138293	-0.208685	Yes	Q3	-0.00554409	-0.420324	HY	1	NA	0	56	223	1	NA	NA	NA	NA	NA	NA	NA	NA	NA	2	2	0	0	0	0	1	0	0	0	0	0	0	0	0	0	0	0	0	0	0	0	0	0	0	0
SL235873	Late Relapse Multiple Myeloma	-0.0265735	-0.136393	No	Q2	0.129279	0.292691	HY	0	1	0	59	436	1	NA	NA	NA	NA	NA	NA	NA	NA	NA	1	2	0	0	0	0	1	1	1	1	0	0	0	0	0	1	0	0	0	0	0	0	0	0	0	0
SL235874	Early Relapse Multiple Myeloma	0.00793579	-0.218158	Yes	Q3	-0.138429	-0.30916	CD2	1	0	0	53	1024	1	NA	NA	NA	NA	NA	NA	NA	NA	NA	NA	NA	1	0	0	0	1	1	1	1	0	0	0	0	0	0	0	0	0	0	0	0	0	0	0	0
SL235875	Late Relapse Multiple Myeloma	0.350161	-0.129262	Yes	Q3	0.665202	-0.302714	HY	0	1	0	59	377	1	NA	NA	NA	NA	NA	NA	NA	NA	NA	2	2	0	0	0	0	1	1	1	1	0	0	0	0	0	1	0	0	0	0	0	0	0	0	0	0
SL235876	Early Relapse Multiple Myeloma	0.00747266	-0.172796	Yes	Q3	-0.23348	-0.568669	LB	0	0	0	64	1951	0	NA	NA	NA	NA	NA	NA	NA	NA	NA	2	2	0	0	0	0	0	0	1	0	0	0	0	0	0	0	0	0	0	0	0	0	0	0	0	0
SL235877	Late Relapse Multiple Myeloma	0.0711644	-0.243329	Yes	Q3	-0.278034	-0.614872	LB	1	0	0	70	745	1	NA	NA	NA	NA	NA	NA	NA	NA	NA	2	NA	NA	NA	NA	NA	NA	NA	NA	NA	NA	0	0	0	0	0	0	0	0	1	0	0	0	0	0	1
SL235878	Early Relapse Multiple Myeloma	0.0719296	-0.106827	Yes	Q3	-0.0776809	-0.454517	CD2	1	0	0	73	490	1	NA	NA	NA	NA	NA	NA	NA	NA	NA	NA	NA	1	0	0	0	1	0	0	0	0	0	0	1	0	0	0	0	0	0	0	0	0	0	0	0
SL235879	Late Relapse Multiple Myeloma	0.0912094	-0.04885	Yes	Q3	0.0425626	-0.387283	LB	1	0	0	52	493	1	NA	NA	NA	NA	NA	NA	NA	NA	NA	2	2	0	0	0	0	0	0	0	0	0	0	0	0	0	0	0	0	0	0	0	0	0	0	0	0
SL238863	Early Relapse Multiple Myeloma	-0.0644629	-0.173465	No	Q2	-0.881887	0.0296163	CD2	0	1	0	48	2974	0	NA	NA	NA	NA	NA	NA	NA	NA	NA	NA	NA	0	0	0	0	0	0	0	0	0	0	0	0	0	0	0	0	0	0	0	0	0	0	0	0
SL238864	Late Relapse Multiple Myeloma	-0.0913207	-0.127185	No	Q2	-0.682104	0.375599	MF	0	0	0	74	520	1	NA	NA	NA	NA	NA	NA	NA	NA	NA	1	2	0	0	0	0	0	0	0	0	0	0	0	0	0	0	0	0	0	0	0	0	0	0	0	1
SL238865	Early Relapse Multiple Myeloma	-0.161633	0.0784042	No	Q1	-0.120651	0.829169	MF	1	1	0	82	277	1	NA	NA	NA	NA	NA	NA	NA	NA	NA	3	3	0	0	0	0	0	0	0	0	0	0	1	0	0	0	0	0	0	1	0	0	0	0	0	0
SL238866	Early Relapse Multiple Myeloma	-0.186142	0.11846	No	Q1	-0.338818	0.989376	MF	0	0	0	73	2393	0	NA	NA	NA	NA	NA	NA	NA	NA	NA	1	NA	0	0	0	0	0	0	0	0	0	0	0	0	0	0	0	0	0	0	0	0	0	0	0	0
SL238867	Early Relapse Multiple Myeloma	-0.0613296	-0.251824	No	Q2	-0.238197	0.514642	LB	1	1	0	54	1749	0	NA	NA	NA	NA	NA	NA	NA	NA	NA	1	1	0	0	0	0	1	0	1	0	0	0	0	0	0	0	0	0	0	0	0	0	0	0	0	0
SL238868	Early Relapse Multiple Myeloma	-0.173644	0.0191126	No	Q1	-0.53122	1.08286	MF	1	0	1	50	2029	0	NA	NA	NA	NA	NA	NA	NA	NA	NA	NA	NA	0	0	0	0	0	0	0	0	0	0	0	0	0	0	0	0	0	0	0	0	0	0	0	0
SL238869	Early Relapse Multiple Myeloma	0.0556288	-0.201709	Yes	Q3	0.287098	0.0787125	HY	0	0	0	64	871	1	NA	NA	NA	NA	NA	NA	NA	NA	NA	NA	NA	0	0	0	0	0	0	0	0	0	0	0	0	0	0	0	0	0	1	0	0	0	0	0	0
SL238870	Early Relapse Multiple Myeloma	-0.0252808	-0.118718	No	Q2	-0.10632	-0.045015	HY	0	0	0	74	496	1	NA	NA	NA	NA	NA	NA	NA	NA	NA	NA	NA	0	0	0	0	1	0	0	0	0	0	0	0	0	0	0	0	0	0	0	0	1	0	0	0
SL238872	MGUS	-0.0142582	-0.140665	No	Q2	-0.484441	0.372481	CD2	1	0	0	55	2625	0	NA	NA	NA	NA	NA	NA	NA	NA	NA	NA	NA	0	0	0	0	1	0	0	0	0	0	0	0	0	0	0	0	0	0	0	0	0	0	0	0
SL238873	Early Relapse Multiple Myeloma	0.0360547	-0.0927246	Yes	Q3	-0.128763	0.0983089	MS	0	0	0	60	771	1	NA	NA	NA	NA	NA	NA	NA	NA	NA	1	NA	NA	NA	NA	NA	NA	NA	NA	NA	NA	0	0	0	0	0	0	0	0	0	0	0	0	0	1	0
SL238874	Early Relapse Multiple Myeloma	-0.176695	-0.0984234	No	Q2	0.0217103	0.417864	CD2	0	0	0	58	46	1	NA	NA	NA	NA	NA	NA	NA	NA	NA	NA	NA	0	0	0	0	0	0	0	0	0	1	0	0	0	0	0	0	0	0	0	0	0	0	0	0
SL238875	Early Relapse Multiple Myeloma	-0.167237	0.159389	No	Q1	-0.238242	1.11985	MF	0	0	0	74	1756	0	NA	NA	NA	NA	NA	NA	NA	NA	NA	3	3	0	0	0	0	0	0	0	0	0	0	0	0	0	0	0	0	0	0	0	0	0	0	0	0
SL238876	Smoldering Multiple Myeloma	-0.0978811	-0.402279	No	Q2	-0.299665	0.0304176	LB	0	0	0	66	1755	0	1301	0	NA	NA	0	1	1	2	3	NA	NA	0	0	0	0	0	0	0	0	0	0	0	0	0	0	0	0	0	0	0	0	0	0	0	0
SL238877	Early Relapse Multiple Myeloma	-0.00601315	-0.120636	No	Q2	-0.475541	0.0778104	HY	0	0	0	71	2041	0	NA	NA	NA	NA	NA	NA	NA	NA	NA	1	2	0	0	0	0	0	1	0	0	0	0	0	0	0	0	0	0	0	0	0	0	0	0	0	0
SL238878	Late Relapse Multiple Myeloma	0.130624	-0.324746	Yes	Q3	-0.13114	-0.0344132	HY	0	0	0	72	871	1	NA	NA	NA	NA	NA	NA	NA	NA	NA	3	3	0	0	0	0	1	1	0	0	0	0	0	0	0	0	0	0	0	0	0	0	0	0	0	0
SL238879	Early Relapse Multiple Myeloma	-0.0720944	-0.0413875	No	Q2	0.0566448	0.66697	CD2	1	0	0	55	1889	0	NA	NA	NA	NA	NA	NA	NA	NA	NA	NA	NA	1	0	0	0	1	0	1	0	0	0	0	0	0	0	0	0	0	0	0	0	0	0	0	0
SL238880	MGUS	-0.0987172	-0.0607888	No	Q2	-0.0544579	0.805145	CD1	1	0	0	60	1449	0	NA	NA	NA	NA	NA	NA	NA	NA	NA	NA	NA	0	0	0	0	0	0	0	0	0	0	0	0	0	0	0	0	0	0	0	0	0	0	0	0
SL238881	Newly Diagnosed Multiple Myeloma	0.282303	-0.0446992	Yes	Q3	0.374117	-0.559795	CD2	1	0	1	78	3000	0	NA	NA	984	1	NA	NA	NA	NA	NA	1	2	1	0	0	0	1	0	0	0	0	0	0	0	0	0	0	0	0	1	0	0	0	0	0	0
SL238882	Early Relapse Multiple Myeloma	0.0331532	-0.0198293	Yes	Q3	0.285316	0.0836762	HY	0	1	0	53	2884	0	NA	NA	NA	NA	NA	NA	NA	NA	NA	1	2	0	0	0	0	0	1	0	1	0	0	0	0	0	0	0	0	0	0	1	0	0	0	0	0
SL238883	Early Relapse Multiple Myeloma	0.428749	0.0843943	Yes	Q4	0.808044	-0.105717	PR	0	0	0	66	784	1	NA	NA	NA	NA	NA	NA	NA	NA	NA	NA	NA	0	0	0	0	0	0	1	0	0	0	0	0	0	0	0	0	0	0	0	0	0	0	0	0
SL238884	Early Relapse Multiple Myeloma	0.285387	0.0234407	Yes	Q4	0.32238	-0.579764	PR	0	0	0	56	792	1	NA	NA	NA	NA	NA	NA	NA	NA	NA	1	2	0	0	0	0	0	0	0	0	0	0	0	0	0	0	0	0	0	0	0	0	0	0	0	0
SL238885	Late Relapse Multiple Myeloma	0.0129538	-0.100901	Yes	Q3	0.381208	0.260232	CD2	0	0	0	65	674	1	NA	NA	NA	NA	NA	NA	NA	NA	NA	2	NA	1	0	0	0	0	0	1	0	0	0	0	0	0	0	0	0	0	0	0	0	0	0	0	0
SL238886	Late Relapse Multiple Myeloma	0.379583	-0.144435	Yes	Q3	0.59803	-0.0485755	PR	1	NA	1	71	295	1	NA	NA	NA	NA	NA	NA	NA	NA	NA	2	2	0	0	0	0	0	0	1	0	0	0	0	1	0	0	0	0	0	0	0	0	0	0	0	0
SL238887	Late Relapse Multiple Myeloma	0.0546923	-0.145095	Yes	Q3	0.0863127	-0.323212	HY	0	0	0	60	330	1	NA	NA	NA	NA	NA	NA	NA	NA	NA	3	3	0	0	0	0	1	0	1	0	0	0	0	0	0	1	0	0	0	0	0	0	0	0	0	0
SL238888	Late Relapse Multiple Myeloma	0.0614467	0.013218	Yes	Q4	0.420637	0.123484	MF	1	0	0	59	296	1	NA	NA	NA	NA	NA	NA	NA	NA	NA	NA	NA	0	0	0	0	1	1	0	1	0	0	0	0	0	0	0	0	0	0	0	0	0	0	0	0
SL238889	Early Relapse Multiple Myeloma	-0.0145738	-0.0409909	No	Q2	-0.0307251	0.970277	MF	0	0	0	51	2240	0	NA	NA	NA	NA	NA	NA	NA	NA	NA	1	1	0	0	0	0	0	0	0	0	0	0	0	0	0	0	0	0	0	0	0	0	0	0	0	0
SL238890	Early Relapse Multiple Myeloma	-0.0392964	-0.141134	No	Q2	-0.358708	0.498804	LB	1	0	0	52	2230	0	NA	NA	NA	NA	NA	NA	NA	NA	NA	1	2	0	0	0	0	0	0	0	0	0	0	0	0	0	0	0	0	0	0	0	0	0	0	0	0
SL238891	Newly Diagnosed Multiple Myeloma	0.404416	0.0644772	Yes	Q4	0.538361	-0.433836	CD1	1	0	1	83	902	0	NA	NA	902	0	NA	NA	NA	NA	NA	3	2	1	0	0	0	1	0	0	0	0	0	0	0	0	0	0	0	0	0	0	0	0	0	0	0
SL238892	Smoldering Multiple Myeloma	0.0253988	0.176824	Yes	Q4	0.590359	0.615353	CD2	0	0	0	66	1210	0	2388	0	NA	NA	0	0	0	2	1	NA	NA	1	0	0	0	0	0	0	0	0	0	0	0	0	0	0	0	0	0	0	0	0	0	0	0
SL238897	Early Relapse Multiple Myeloma	0.328888	0.110427	Yes	Q4	0.751655	-0.606715	PR	0	0	0	83	295	1	NA	NA	NA	NA	NA	NA	NA	NA	NA	1	2	0	0	0	0	1	0	1	0	0	0	0	0	0	0	0	0	0	0	0	0	0	0	0	1
SL238898	Late Relapse Multiple Myeloma	0.10357	-0.0351095	Yes	Q3	0.115274	-0.337764	CD2	1	0	0	70	801	1	NA	NA	NA	NA	NA	NA	NA	NA	NA	2	2	1	0	0	0	1	0	0	0	0	0	0	0	0	0	0	0	0	0	0	0	0	0	0	0
SL238899	Early Relapse Multiple Myeloma	-0.048742	0.11471	No	Q1	0.173166	0.467132	MF	0	0	0	69	119	1	NA	NA	NA	NA	NA	NA	NA	NA	NA	3	3	1	0	0	0	0	1	0	0	0	0	0	0	0	0	0	0	0	0	0	0	0	0	0	0
SL238900	Early Relapse Multiple Myeloma	0.262246	0.0569468	Yes	Q4	0.329468	-0.762615	CD1	0	0	0	63	660	1	NA	NA	NA	NA	NA	NA	NA	NA	NA	2	2	1	0	0	0	1	0	0	0	0	0	0	0	0	0	0	0	0	0	0	0	0	0	0	0
SL238901	Early Relapse Multiple Myeloma	0.112973	0.0245574	Yes	Q4	-0.0890159	-0.631495	MS	0	0	0	56	18	1	NA	NA	NA	NA	NA	NA	NA	NA	NA	1	2	0	0	1	0	1	0	1	1	0	0	0	0	0	0	0	0	0	0	0	0	0	0	0	0
SL238902	Late Relapse Multiple Myeloma	0.214159	0.0712074	Yes	Q4	0.39433	-0.241904	MS	0	0	0	58	65	1	NA	NA	NA	NA	NA	NA	NA	NA	NA	2	NA	0	0	1	0	0	1	1	1	1	0	0	0	0	0	0	0	0	0	0	0	0	0	0	0
SL238903	Late Relapse Multiple Myeloma	0.281369	0.115846	Yes	Q4	0.615524	-0.327003	LB	1	0	0	71	710	1	NA	NA	NA	NA	NA	NA	NA	NA	NA	3	3	0	0	0	0	1	1	1	1	0	0	0	0	0	0	0	0	0	0	0	0	0	0	0	1
SL238904	Late Relapse Multiple Myeloma	0.173718	0.029819	Yes	Q4	0.367052	-0.454601	MS	0	0	0	52	600	1	NA	NA	NA	NA	NA	NA	NA	NA	NA	NA	NA	NA	NA	NA	NA	NA	NA	NA	NA	NA	0	0	0	0	0	0	0	0	0	0	0	0	0	0	0
SL240773	Early Relapse Multiple Myeloma	0.148185	-0.239962	Yes	Q3	0.153592	-0.204976	MS	0	0	0	61	1098	1	NA	NA	NA	NA	NA	NA	NA	NA	NA	1	2	0	0	1	0	0	0	0	0	0	0	0	0	0	0	0	0	0	0	0	0	0	0	0	0
SL240774	Smoldering Multiple Myeloma	-0.177488	-0.0118675	No	Q2	-0.0334088	1.17653	MF	1	0	0	74	155	1	155	0	NA	NA	0	0	0	2	1	NA	NA	NA	NA	NA	NA	NA	NA	NA	NA	NA	0	0	0	0	0	0	0	0	0	0	0	0	0	0	0
SL240775	Early Relapse Multiple Myeloma	-0.0838395	0.141175	No	Q1	-0.0605604	0.795851	MF	1	0	0	65	42	1	NA	NA	NA	NA	NA	NA	NA	NA	NA	1	NA	NA	NA	NA	NA	NA	NA	NA	NA	NA	0	0	0	0	0	0	0	0	0	0	0	0	0	0	0
SL240776	Early Relapse Multiple Myeloma	-0.0831465	-0.153335	No	Q2	-0.146594	0.590334	HY	1	0	0	71	244	1	NA	NA	NA	NA	NA	NA	NA	NA	NA	1	2	0	0	0	0	0	0	0	0	0	0	0	0	0	0	0	0	0	0	0	0	0	0	0	0
SL240777	Early Relapse Multiple Myeloma	0.0253043	-0.268304	Yes	Q3	-0.348614	-0.161525	MS	1	0	0	77	1676	1	NA	NA	NA	NA	NA	NA	NA	NA	NA	1	2	0	0	1	0	1	0	1	1	1	0	0	0	0	0	0	0	0	0	0	0	0	0	0	0
SL240778	Early Relapse Multiple Myeloma	-0.245918	0.00177409	No	Q1	-0.225876	1.08223	MF	0	0	0	59	1559	0	NA	NA	NA	NA	NA	NA	NA	NA	NA	1	NA	NA	NA	NA	NA	NA	NA	NA	NA	NA	0	0	0	0	0	0	0	0	0	0	0	0	0	0	0
SL240779	Late Relapse Multiple Myeloma	-0.0164131	-0.130504	No	Q2	0.285373	0.386286	CD2	0	1	0	66	432	1	NA	NA	NA	NA	NA	NA	NA	NA	NA	2	2	0	0	0	0	0	0	0	0	0	0	0	0	0	0	0	0	0	0	0	0	0	0	0	0
SL240780	Smoldering Multiple Myeloma	-0.140919	-0.162815	No	Q2	-0.72366	0.107296	MF	0	0	0	69	2297	0	3534	0	NA	NA	0	0	0	1	1	NA	NA	0	0	0	0	0	0	0	0	0	0	0	0	0	0	0	0	0	0	0	0	0	0	0	0
SL240781	Early Relapse Multiple Myeloma	0.0418071	-0.0605893	Yes	Q3	-0.0733971	0.436887	MF	1	0	0	60	1795	0	NA	NA	NA	NA	NA	NA	NA	NA	NA	1	2	0	1	0	0	1	0	1	1	0	0	0	0	0	0	0	0	0	0	0	0	0	0	0	0
SL240782	Late Relapse Multiple Myeloma	0.027148	-0.191681	Yes	Q3	0.384631	0.537274	CD2	1	NA	0	74	1823	0	NA	NA	NA	NA	NA	NA	NA	NA	NA	NA	NA	0	0	0	0	1	0	1	0	0	0	0	0	0	0	0	0	0	0	0	0	0	0	0	0
SL240783	Late Relapse Multiple Myeloma	-0.0498849	-0.143788	No	Q2	0.274983	1.11673	PR	0	0	0	61	149	1	NA	NA	NA	NA	NA	NA	NA	NA	NA	2	2	0	0	0	0	0	0	1	0	0	0	0	0	0	0	0	0	0	0	0	0	0	0	0	0
SL240784	Early Relapse Multiple Myeloma	-0.00368551	-0.198851	No	Q2	0.254733	0.74982	CD2	0	0	1	53	171	1	NA	NA	NA	NA	NA	NA	NA	NA	NA	NA	NA	1	0	0	0	0	0	0	0	0	0	0	0	0	0	0	0	0	0	0	1	0	0	0	0
SL240785	Early Relapse Multiple Myeloma	0.17515	0.0366582	Yes	Q4	0.11433	-0.0252885	HY	1	0	0	65	1056	1	NA	NA	NA	NA	NA	NA	NA	NA	NA	3	3	0	0	0	0	0	0	1	0	0	0	0	0	0	0	0	0	0	0	0	0	0	0	0	0
SL240786	Newly Diagnosed Multiple Myeloma	0.0988682	-0.212977	Yes	Q3	0.237486	-0.142249	HY	0	0	0	76	1976	0	NA	NA	1951	0	NA	NA	NA	NA	NA	1	1	0	0	0	0	0	0	0	0	0	0	0	0	0	0	0	0	0	0	0	0	0	0	0	0
SL240787	Early Relapse Multiple Myeloma	0.274519	0.0226575	Yes	Q4	0.997197	0.545704	PR	1	NA	1	69	137	1	NA	NA	NA	NA	NA	NA	NA	NA	NA	3	2	0	0	0	0	0	0	1	1	0	0	0	0	1	0	0	0	0	0	0	0	0	0	0	0
SL240788	Late Relapse Multiple Myeloma	0.105586	-0.0430527	Yes	Q3	0.0823874	-0.282454	CD2	1	NA	1	49	340	1	NA	NA	NA	NA	NA	NA	NA	NA	NA	2	2	1	0	0	0	0	0	1	0	0	0	0	0	0	0	0	0	0	0	0	0	0	0	0	0
SL240789	Early Relapse Multiple Myeloma	0.122172	0.114944	Yes	Q4	0.201904	-0.138883	HY	0	0	0	71	1092	0	NA	NA	NA	NA	NA	NA	NA	NA	NA	1	1	0	0	0	0	0	0	0	0	0	0	0	0	0	0	0	0	0	0	0	0	0	0	0	0
SL240791	Late Relapse Multiple Myeloma	-0.0258538	0.159563	No	Q1	0.156523	0.20761	MF	1	0	0	66	225	1	NA	NA	NA	NA	NA	NA	NA	NA	NA	NA	NA	0	0	0	0	1	0	1	0	0	0	0	0	0	0	0	0	0	0	0	0	0	0	0	0
SL240792	Early Relapse Multiple Myeloma	0.0196785	-0.154039	Yes	Q3	-0.372545	-0.63492	CD2	1	0	0	61	1306	0	NA	NA	NA	NA	NA	NA	NA	NA	NA	1	1	1	0	0	0	1	0	0	0	0	0	0	0	0	0	0	0	0	0	0	0	0	0	0	0
SL240793	Smoldering Multiple Myeloma	-0.15998	-0.117432	No	Q2	-0.471889	-0.512881	HY	1	0	0	70	857	0	0	0	NA	NA	1	1	0	2	3	NA	NA	0	0	0	0	0	0	0	0	0	0	0	0	0	0	0	0	0	0	0	0	0	0	0	0
SL240794	Early Relapse Multiple Myeloma	-0.0367715	0.15843	No	Q1	0.070966	0.139738	CD2	0	0	0	62	1217	0	NA	NA	NA	NA	NA	NA	NA	NA	NA	NA	NA	1	0	0	0	1	0	0	0	0	0	0	0	0	0	0	0	0	0	0	0	0	0	0	0
SL240795	Early Relapse Multiple Myeloma	0.219852	0.161499	Yes	Q4	0.364496	-0.128655	LB	1	0	0	66	1301	0	NA	NA	NA	NA	NA	NA	NA	NA	NA	1	1	0	0	0	0	1	0	1	0	0	0	0	0	0	0	0	0	0	0	0	0	0	0	0	0
SL240796	Smoldering Multiple Myeloma	-0.254967	0.128243	No	Q1	-0.125027	0.355997	MS	1	0	0	56	810	0	9	0	NA	NA	0	1	0	2	2	NA	NA	0	0	1	0	1	1	0	1	0	0	0	0	0	0	0	0	0	0	0	0	0	0	0	0
SL240797	Newly Diagnosed Multiple Myeloma	0.358011	-0.0798543	Yes	Q3	0.550154	-0.205953	PR	1	0	0	69	1759	0	NA	NA	1675	0	NA	NA	NA	NA	NA	3	3	0	0	0	0	1	0	0	0	0	0	0	0	0	0	0	0	0	0	0	0	0	0	0	0
SL240798	Newly Diagnosed Multiple Myeloma	-0.28968	0.233029	No	Q1	-0.125425	0.534543	MF	0	0	0	81	1776	0	NA	NA	1758	0	NA	NA	NA	NA	NA	2	2	0	0	0	0	0	0	0	0	0	0	0	0	0	0	0	0	0	0	0	0	0	0	0	0
SL240799	Newly Diagnosed Multiple Myeloma	-0.344592	0.186484	No	Q1	-0.371215	0.233495	MF	1	0	0	54	1679	0	NA	NA	2454	0	NA	NA	NA	NA	NA	1	NA	0	0	1	0	0	0	0	0	0	0	0	0	0	0	0	0	0	0	0	0	0	0	0	0
SL240800	Early Relapse Multiple Myeloma	0.138968	0.113215	Yes	Q4	0.286902	-0.0949141	HY	1	0	0	67	1146	1	NA	NA	NA	NA	NA	NA	NA	NA	NA	1	1	0	0	0	0	1	0	1	0	0	0	0	0	0	0	0	1	0	0	0	0	0	0	0	0
SL240801	Early Relapse Multiple Myeloma	-0.177955	0.310735	No	Q1	0.575673	1.48245	MF	1	0	0	74	213	1	NA	NA	NA	NA	NA	NA	NA	NA	NA	NA	NA	0	0	0	0	0	0	0	0	0	0	0	0	0	0	0	0	0	0	0	0	0	0	0	0
SL240802	MGUS	-0.374436	0.144897	No	Q1	-0.604922	0.170484	MF	0	0	0	77	999	0	NA	NA	NA	NA	NA	NA	NA	NA	NA	NA	NA	0	0	0	0	0	0	0	0	0	0	0	0	0	0	0	0	0	0	0	0	0	0	0	0
SL240803	Early Relapse Multiple Myeloma	0.168557	0.0142469	Yes	Q4	0.562211	-0.173612	CD2	1	0	0	42	1049	0	NA	NA	NA	NA	NA	NA	NA	NA	NA	1	1	0	0	0	0	1	0	0	0	0	0	0	0	0	0	0	0	0	0	0	0	0	0	0	0
SL240804	MGUS	-0.321227	0.0915665	No	Q1	-0.145337	0.772481	MF	0	0	1	45	1084	0	NA	NA	NA	NA	NA	NA	NA	NA	NA	NA	NA	NA	NA	NA	NA	NA	NA	NA	NA	NA	0	0	0	0	0	0	0	0	0	0	0	0	0	0	0
SL240805	Early Relapse Multiple Myeloma	0.015804	0.249323	Yes	Q4	0.47414	1.09467	MF	1	0	0	71	1256	0	NA	NA	NA	NA	NA	NA	NA	NA	NA	1	1	0	0	0	0	0	0	0	0	0	0	0	0	0	0	0	0	0	0	0	0	0	0	0	0
SL240806	Smoldering Multiple Myeloma	0.0660134	-0.00094793	Yes	Q3	0.38811	0.0635483	CD2	1	0	0	44	1331	0	2381	0	NA	NA	0	0	1	2	2	NA	NA	1	0	0	0	0	0	0	0	0	0	0	0	0	0	0	0	0	0	0	0	0	0	0	0
SL240807	Early Relapse Multiple Myeloma	-0.0230647	0.0106072	No	Q1	-0.146802	-0.288182	HY	0	0	0	76	1355	0	NA	NA	NA	NA	NA	NA	NA	NA	NA	1	2	0	0	0	0	1	1	0	0	0	0	0	0	0	0	0	0	0	0	0	0	0	0	0	0
SL240808	MGUS	-0.153776	0.0266441	No	Q1	-0.0845141	0.0729143	HY	0	0	0	67	714	0	NA	NA	NA	NA	NA	NA	NA	NA	NA	NA	NA	0	0	0	0	1	0	0	0	0	0	0	0	0	0	0	0	0	0	0	0	0	0	0	0
SL240809	Smoldering Multiple Myeloma	-0.325936	0.08822	No	Q1	0.0116557	0.43843	MF	0	0	0	83	231	1	231	0	NA	NA	0	0	1	2	2	NA	NA	0	1	0	0	1	0	1	1	0	0	0	0	0	0	0	0	0	0	0	0	0	0	0	0
SL240810	Newly Diagnosed Multiple Myeloma	-0.168023	0.0981524	No	Q1	-0.087178	0.172449	MF	0	0	0	59	1393	1	NA	NA	1261	1	NA	NA	NA	NA	NA	2	2	1	0	0	0	0	0	0	0	0	0	0	0	0	0	0	0	0	0	0	0	0	0	0	0
SL240811	Early Relapse Multiple Myeloma	-0.0316461	0.14858	No	Q1	-0.259691	0.134815	MF	1	0	0	40	1618	0	NA	NA	NA	NA	NA	NA	NA	NA	NA	NA	NA	0	0	0	0	0	0	0	0	0	0	0	0	0	0	0	0	0	0	0	0	0	0	0	0
SL240812	Early Relapse Multiple Myeloma	-0.0576567	0.0929252	No	Q1	-0.200966	0.00992037	CD2	0	0	0	78	383	1	NA	NA	NA	NA	NA	NA	NA	NA	NA	2	2	0	0	0	0	0	0	0	0	0	0	0	0	0	0	0	0	0	0	0	0	0	0	0	0
SL240813	Early Relapse Multiple Myeloma	-0.0832099	-0.0707604	No	Q2	0.133762	0.24689	LB	0	0	0	66	1609	0	NA	NA	NA	NA	NA	NA	NA	NA	NA	NA	NA	0	0	0	0	1	0	1	0	0	0	0	0	0	0	0	0	0	0	0	0	0	0	0	0
SL240814	MGUS	-0.382307	0.0722218	No	Q1	-0.165457	0.410459	CD2	1	0	0	54	1300	0	NA	NA	NA	NA	NA	NA	NA	NA	NA	NA	NA	0	0	0	0	0	0	0	0	0	0	0	0	0	0	0	0	0	1	0	0	0	0	0	0
SL240815	Late Relapse Multiple Myeloma	-0.0438465	0.133084	No	Q1	0.281802	0.525085	HY	1	0	0	74	1560	0	NA	NA	NA	NA	NA	NA	NA	NA	NA	3	2	0	0	0	0	0	0	0	0	0	0	0	0	0	0	0	0	0	0	0	0	0	0	0	0
SL240816	Late Relapse Multiple Myeloma	0.362844	0.159772	Yes	Q4	0.782144	-0.198573	PR	1	0	0	52	137	1	NA	NA	NA	NA	NA	NA	NA	NA	NA	2	2	0	0	0	0	1	1	0	1	0	0	0	0	0	0	0	0	0	0	0	0	0	0	0	0
SL240817	Newly Diagnosed Multiple Myeloma	-0.00602521	0.0510919	No	Q1	0.0854768	-0.472754	HY	1	0	0	74	886	0	NA	NA	881	0	NA	NA	NA	NA	NA	1	2	0	0	0	0	1	0	0	0	0	0	0	0	0	0	0	0	0	0	0	0	0	0	0	0
SL240818	Early Relapse Multiple Myeloma	0.349116	0.0557222	Yes	Q4	0.788756	-0.516214	HY	0	1	0	80	650	1	NA	NA	NA	NA	NA	NA	NA	NA	NA	3	3	0	0	0	0	0	0	0	0	0	0	0	0	0	0	0	1	0	0	0	0	0	0	0	1
SL240819	Newly Diagnosed Multiple Myeloma	-0.155772	-0.116956	No	Q2	-0.75737	-0.809349	MS	0	0	0	65	1306	0	NA	NA	1258	0	NA	NA	NA	NA	NA	1	NA	NA	NA	NA	NA	NA	NA	NA	NA	NA	0	0	0	0	0	0	0	0	0	0	0	0	0	0	0
SL240820	Smoldering Multiple Myeloma	-0.0441093	0.103236	No	Q1	0.366244	0.117661	CD2	1	0	0	39	1307	0	2393	0	NA	NA	0	0	1	2	2	NA	NA	1	0	0	0	0	0	0	0	0	0	0	0	0	0	0	0	0	0	0	0	0	0	0	0
SL240821	Newly Diagnosed Multiple Myeloma	0.213729	-0.0586259	Yes	Q3	0.386218	-0.47615	CD1	1	0	0	56	12	1	NA	NA	88	1	NA	NA	NA	NA	NA	3	2	0	0	0	0	0	0	0	0	0	0	0	0	0	0	0	0	0	0	0	0	0	0	0	0
SL240822	Early Relapse Multiple Myeloma	0.269006	0.00229753	Yes	Q4	0.533733	-0.230572	HY	1	1	0	47	1841	0	NA	NA	NA	NA	NA	NA	NA	NA	NA	2	2	0	0	0	0	0	0	1	0	0	0	0	0	0	0	0	0	0	0	0	0	0	0	0	1
SL240823	Early Relapse Multiple Myeloma	0.172404	-0.0113629	Yes	Q3	0.257846	-0.198218	HY	1	0	1	49	1847	0	NA	NA	NA	NA	NA	NA	NA	NA	NA	NA	NA	0	0	0	0	0	0	0	0	0	0	0	0	0	0	0	0	0	0	0	0	0	0	0	0
SL240824	Early Relapse Multiple Myeloma	0.0185562	-0.0271087	Yes	Q3	0.327509	-0.016358	HY	1	0	0	61	1764	0	NA	NA	NA	NA	NA	NA	NA	NA	NA	1	1	0	0	0	0	1	0	1	0	0	0	0	0	0	0	0	0	0	1	0	0	0	0	0	0
SL240825	Early Relapse Multiple Myeloma	-0.0333563	-0.00335266	No	Q2	0.457676	0.378555	MF	0	0	0	75	1372	0	NA	NA	NA	NA	NA	NA	NA	NA	NA	NA	NA	0	1	0	0	0	0	1	1	0	0	0	0	0	0	0	0	0	0	0	0	0	0	0	0
SL240826	Early Relapse Multiple Myeloma	-0.0709436	0.0472377	No	Q1	0.145305	0.262235	HY	1	0	0	67	1265	0	NA	NA	NA	NA	NA	NA	NA	NA	NA	1	2	0	0	0	0	0	1	0	0	0	0	0	0	0	0	0	0	0	0	0	0	0	0	0	1
SL240827	MGUS	-0.430796	0.0233918	No	Q1	-0.425361	0.410814	MF	0	0	0	64	1644	0	NA	NA	NA	NA	NA	NA	NA	NA	NA	NA	NA	0	0	0	0	0	0	0	0	0	0	0	0	0	0	0	0	0	0	0	0	0	0	0	0
SL240828	Early Relapse Multiple Myeloma	-0.205913	0.191695	No	Q1	-0.0555103	0.400655	MF	1	0	0	53	1723	0	NA	NA	NA	NA	NA	NA	NA	NA	NA	NA	NA	0	0	0	0	0	0	0	0	0	0	0	0	0	0	0	0	0	0	0	0	0	0	0	0
SL240829	Early Relapse Multiple Myeloma	-0.324711	0.159107	No	Q1	-0.0951553	0.725119	MF	1	0	0	69	1628	0	NA	NA	NA	NA	NA	NA	NA	NA	NA	1	NA	NA	NA	NA	NA	NA	NA	NA	NA	NA	0	0	0	0	0	0	0	0	0	0	0	0	0	0	0
SL240830	Early Relapse Multiple Myeloma	0.101619	0.0809775	Yes	Q4	0.183751	0.160016	HY	0	1	0	41	1572	0	NA	NA	NA	NA	NA	NA	NA	NA	NA	1	1	0	0	0	0	0	0	1	0	0	0	0	0	0	0	0	0	0	0	0	0	0	0	0	0
SL240831	MGUS	0.017136	0.223947	Yes	Q4	0.885156	1.12074	MF	1	0	0	59	1517	0	NA	NA	NA	NA	NA	NA	NA	NA	NA	NA	NA	0	0	0	0	0	0	0	0	0	0	0	0	0	0	0	0	0	0	0	0	0	0	0	0
SL240833	Newly Diagnosed Multiple Myeloma	0.0178167	0.142669	Yes	Q4	0.659361	0.668662	CD1	0	0	0	69	1459	0	NA	NA	204	1	NA	NA	NA	NA	NA	1	NA	1	0	0	0	0	0	0	0	0	0	0	0	1	1	0	0	0	1	0	0	0	0	0	0
SL240834	MGUS	-0.348664	-0.0517804	No	Q2	-0.485797	0.2557	MF	1	1	0	57	33	0	NA	NA	NA	NA	NA	NA	NA	NA	NA	NA	NA	0	0	0	0	0	0	0	0	0	0	0	0	0	0	0	0	0	0	0	0	0	0	0	0
SL240835	Early Relapse Multiple Myeloma	-0.300364	0.189853	No	Q1	0.473135	1.10383	CD2	1	0	0	61	1560	0	NA	NA	NA	NA	NA	NA	NA	NA	NA	1	1	0	0	0	0	0	0	0	0	0	0	0	0	0	0	0	0	0	0	0	0	0	0	0	0
SL240836	MGUS	-0.309521	0.290057	No	Q1	-0.10138	0.500758	MF	0	0	0	80	463	1	NA	NA	NA	NA	NA	NA	NA	NA	NA	NA	NA	0	0	0	0	1	0	0	0	0	0	0	0	0	0	0	0	0	0	0	0	0	0	0	0
SL240837	Early Relapse Multiple Myeloma	0.0231732	0.0674046	Yes	Q4	0.202177	0.230839	HY	0	0	0	63	1226	1	NA	NA	NA	NA	NA	NA	NA	NA	NA	1	1	0	0	0	0	0	0	0	0	0	0	0	0	0	0	0	0	0	0	0	0	0	0	0	0
SL240838	Newly Diagnosed Multiple Myeloma	-0.00474499	-0.0323475	No	Q2	-0.00714711	-0.249113	HY	0	0	0	75	1075	0	NA	NA	1064	0	NA	NA	NA	NA	NA	2	2	0	0	0	0	0	0	0	0	0	0	0	0	0	0	0	0	0	0	0	0	0	0	0	0
SL240839	Early Relapse Multiple Myeloma	-0.0824289	-0.0463609	No	Q2	-0.490721	-0.592301	LB	1	0	0	62	805	1	NA	NA	NA	NA	NA	NA	NA	NA	NA	NA	NA	0	0	0	1	0	0	0	0	0	0	0	0	0	0	0	0	0	0	0	0	0	0	0	0
SL240840	Late Relapse Multiple Myeloma	0.144707	-0.0209696	Yes	Q3	0.181947	-0.324912	HY	0	0	0	77	823	1	NA	NA	NA	NA	NA	NA	NA	NA	NA	1	1	0	0	0	0	0	0	1	0	0	0	0	0	0	0	0	0	0	0	0	0	0	0	0	0
SL240841	Late Relapse Multiple Myeloma	0.251872	0.144119	Yes	Q4	0.646551	0.393954	PR	0	0	0	67	62	1	NA	NA	NA	NA	NA	NA	NA	NA	NA	3	3	0	0	0	0	0	0	1	0	0	0	0	0	0	0	0	0	0	0	0	0	0	0	0	0
SL240842	Newly Diagnosed Multiple Myeloma	-0.113154	0.0449702	No	Q1	0.772328	0.67714	CD1	0	0	0	78	1371	0	NA	NA	1371	0	NA	NA	NA	NA	NA	3	2	1	0	0	0	1	0	0	0	0	0	0	0	0	0	0	0	0	0	0	0	0	0	0	0
SL240843	Early Relapse Multiple Myeloma	0.216212	-0.0502978	Yes	Q3	0.517818	-0.283172	HY	0	0	0	73	1277	0	NA	NA	NA	NA	NA	NA	NA	NA	NA	1	1	0	0	0	0	0	0	0	0	0	0	0	0	0	0	0	0	0	1	0	0	0	0	0	0
SL240844	Early Relapse Multiple Myeloma	0.0232694	-0.0194855	Yes	Q3	0.0994616	-0.317712	MS	1	0	0	55	78	1	NA	NA	NA	NA	NA	NA	NA	NA	NA	1	2	0	0	1	0	1	0	1	1	0	0	0	0	0	0	0	0	0	0	0	0	0	0	0	0
SL240845	Early Relapse Multiple Myeloma	0.369467	0.111882	Yes	Q4	0.851573	-0.401773	CD1	0	0	0	67	558	1	NA	NA	NA	NA	NA	NA	NA	NA	NA	1	1	1	0	0	0	0	0	0	0	0	0	0	0	0	0	0	0	0	0	0	0	0	0	0	0
SL240846	Late Relapse Multiple Myeloma	0.211514	-0.0801207	Yes	Q3	0.391419	-0.169583	LB	1	0	0	70	557	1	NA	NA	NA	NA	NA	NA	NA	NA	NA	3	2	0	0	0	0	0	0	1	0	0	0	0	0	0	0	0	0	0	1	0	0	0	0	0	1
SL240847	Early Relapse Multiple Myeloma	0.18734	0.021735	Yes	Q4	0.490928	-0.289019	LB	1	1	0	51	1728	0	NA	NA	NA	NA	NA	NA	NA	NA	NA	1	1	0	0	0	0	1	0	0	0	0	0	0	0	0	0	0	0	0	0	0	0	0	0	0	0
SL240848	Early Relapse Multiple Myeloma	-0.169468	0.200775	No	Q1	-0.114902	0.504344	MS	1	0	0	51	1680	0	NA	NA	NA	NA	NA	NA	NA	NA	NA	3	3	0	0	0	0	0	0	1	0	0	0	0	0	0	0	0	0	0	1	0	0	0	0	0	0
SL240849	Smoldering Multiple Myeloma	-0.0932994	-0.101422	No	Q2	-0.146274	-0.304786	HY	1	0	0	76	1190	0	459	0	NA	NA	1	0	1	2	3	NA	NA	0	0	0	0	0	0	0	0	0	0	0	0	0	0	0	0	0	0	0	0	0	0	0	0
SL240850	Smoldering Multiple Myeloma	-0.196858	0.171412	No	Q1	-0.105298	-0.050194	MF	0	0	0	83	19	1	19	0	NA	NA	0	NA	NA	1	NA	NA	NA	0	0	0	0	0	0	0	0	0	0	0	0	0	0	0	0	0	0	0	0	0	0	0	0
SL240851	Late Relapse Multiple Myeloma	0.212231	0.121904	Yes	Q4	0.542079	-0.139574	HY	0	0	0	66	710	1	NA	NA	NA	NA	NA	NA	NA	NA	NA	2	2	0	0	0	0	0	0	0	0	0	0	0	0	0	0	0	0	0	0	0	0	0	0	0	0
SL240852	Newly Diagnosed Multiple Myeloma	-0.111973	0.0976984	No	Q1	0.330767	0.343701	CD1	1	0	0	56	1516	0	NA	NA	203	1	NA	NA	NA	NA	NA	2	2	1	0	0	0	1	0	0	0	0	0	0	0	0	0	0	0	0	0	0	0	0	0	0	0
SL240853	Smoldering Multiple Myeloma	-0.142067	0.0615611	No	Q1	0.0463951	-0.00849624	LB	1	0	0	46	1112	0	359	0	NA	NA	0	0	0	2	1	NA	NA	0	0	0	0	0	0	0	0	0	0	0	0	0	0	0	0	0	0	0	0	0	0	0	0
SL240854	Early Relapse Multiple Myeloma	0.118438	0.177265	Yes	Q4	0.624464	0.675532	PR	0	0	0	76	1517	0	NA	NA	NA	NA	NA	NA	NA	NA	NA	NA	NA	1	0	0	0	0	0	1	1	0	0	0	0	0	0	0	0	0	0	0	0	0	0	0	0
SL240855	Early Relapse Multiple Myeloma	0.000560307	0.0204705	Yes	Q4	0.0196626	-0.12473	LB	1	0	0	72	1200	1	NA	NA	NA	NA	NA	NA	NA	NA	NA	1	1	0	0	0	0	1	0	1	0	0	0	0	0	0	0	0	0	0	0	0	0	1	0	0	0
SL240856	Smoldering Multiple Myeloma	-0.0114139	0.223793	No	Q1	0.300285	-0.11826	MF	1	0	0	70	30	1	30	0	NA	NA	1	0	1	2	3	NA	NA	0	1	0	0	1	1	1	1	1	0	0	0	0	0	0	0	0	1	0	0	0	0	0	0
SL240857	Late Relapse Multiple Myeloma	0.218467	0.0261885	Yes	Q4	0.458205	-0.69271	HY	0	0	0	76	1106	1	NA	NA	NA	NA	NA	NA	NA	NA	NA	1	1	0	0	0	0	0	0	1	0	0	0	0	0	0	0	0	0	0	0	0	0	0	0	0	0
SL240858	Smoldering Multiple Myeloma	0.296796	-0.0981357	Yes	Q3	0.292921	-0.51832	HY	0	0	0	85	1051	1	192	1	NA	NA	0	1	1	2	3	NA	NA	0	0	0	0	0	0	0	0	0	0	0	0	0	0	0	0	0	0	0	0	0	0	0	0
SL240859	Late Relapse Multiple Myeloma	0.197046	0.152092	Yes	Q4	0.192016	-0.664681	HY	1	1	0	55	1813	0	NA	NA	NA	NA	NA	NA	NA	NA	NA	1	1	0	0	0	0	0	0	1	0	0	0	0	0	0	0	0	0	0	0	0	0	0	0	0	0
SL240860	Newly Diagnosed Multiple Myeloma	-0.301454	0.112096	No	Q1	0.202338	0.586301	MS	1	0	0	77	55	1	NA	NA	NA	NA	1	0	1	2	3	NA	NA	0	0	0	0	1	0	1	0	0	0	0	0	0	0	0	0	0	0	0	0	0	0	0	0
SL240861	Late Relapse Multiple Myeloma	0.00074583	-0.00346878	Yes	Q3	0.222872	0.156234	PR	0	NA	1	56	242	1	NA	NA	NA	NA	NA	NA	NA	NA	NA	1	1	0	0	0	0	0	0	1	0	0	0	0	1	0	0	0	0	0	0	0	0	0	0	0	0
SL240862	Early Relapse Multiple Myeloma	-0.271467	0.123405	No	Q1	-0.130917	0.321384	MF	1	0	0	60	1317	0	NA	NA	NA	NA	NA	NA	NA	NA	NA	NA	NA	0	0	0	0	0	0	0	0	0	0	0	0	0	0	0	0	0	0	0	0	0	0	0	0
SL240863	Late Relapse Multiple Myeloma	0.35658	0.0960563	Yes	Q4	1.02053	0.252354	PR	0	1	0	59	103	1	NA	NA	NA	NA	NA	NA	NA	NA	NA	2	2	0	0	0	0	1	1	1	1	0	0	0	0	0	1	0	0	0	0	0	0	0	0	0	0
SL240864	Newly Diagnosed Multiple Myeloma	0.119108	0.139523	Yes	Q4	0.283102	-0.146966	LB	1	0	0	83	708	1	NA	NA	70	1	NA	NA	NA	NA	NA	1	1	0	0	0	0	1	0	1	0	0	0	0	0	0	0	0	0	0	0	0	0	0	0	0	0
SL240865	Late Relapse Multiple Myeloma	0.114987	0.0532394	Yes	Q4	0.535537	0.209399	CD2	1	0	0	54	580	1	NA	NA	NA	NA	NA	NA	NA	NA	NA	NA	NA	1	0	0	0	1	0	0	0	0	0	0	0	0	0	0	0	0	1	0	0	0	0	0	0
SL240866	Early Relapse Multiple Myeloma	0.192073	0.257322	Yes	Q4	0.572038	0.307542	PR	0	0	0	73	201	1	NA	NA	NA	NA	NA	NA	NA	NA	NA	3	2	0	0	0	0	1	0	1	0	0	0	0	0	0	0	0	0	0	0	0	0	0	0	0	0
SL240867	Early Relapse Multiple Myeloma	0.147876	0.0900879	Yes	Q4	-0.111215	-0.789148	HY	0	0	0	73	88	1	NA	NA	NA	NA	NA	NA	NA	NA	NA	3	2	0	0	0	0	0	0	0	0	0	0	0	1	0	0	0	0	0	0	0	0	0	0	0	0
SL240868	Early Relapse Multiple Myeloma	-0.123212	-0.0192695	No	Q2	-0.17787	-0.213888	MS	1	0	0	70	1241	1	NA	NA	NA	NA	NA	NA	NA	NA	NA	2	2	0	0	0	0	1	0	1	0	0	0	0	0	0	0	0	0	0	0	0	0	0	0	0	0
SL240869	Early Relapse Multiple Myeloma	0.0152529	-0.0624423	Yes	Q3	-0.0299015	0.551562	PR	0	NA	0	62	2341	0	NA	NA	NA	NA	NA	NA	NA	NA	NA	1	2	0	0	0	0	0	0	0	0	0	0	0	0	0	0	0	0	0	0	0	0	0	0	0	0
SL240870	Early Relapse Multiple Myeloma	-0.162221	-0.0616392	No	Q2	-0.537435	0.927707	MF	0	0	0	58	2145	0	NA	NA	NA	NA	NA	NA	NA	NA	NA	1	NA	0	0	0	0	1	0	1	0	0	0	0	0	0	0	0	0	0	0	0	0	0	0	0	0
SL240871	Newly Diagnosed Multiple Myeloma	-0.19745	-0.0618427	No	Q2	-0.719168	0.787668	MF	0	0	0	59	1711	0	NA	NA	1691	0	NA	NA	NA	NA	NA	1	1	0	0	0	0	0	0	0	0	0	0	0	0	0	0	0	0	0	0	0	0	0	0	0	0
SL240872	Late Relapse Multiple Myeloma	0.0753876	-0.178968	Yes	Q3	0.23271	0.139816	CD2	0	0	0	75	213	1	NA	NA	NA	NA	NA	NA	NA	NA	NA	1	1	1	0	0	0	0	0	1	0	0	0	0	0	0	1	0	0	0	0	0	0	0	0	0	0
SL240873	Early Relapse Multiple Myeloma	-0.187054	0.0888358	No	Q1	-1.12419	0.0193523	MF	1	0	0	64	2094	0	NA	NA	NA	NA	NA	NA	NA	NA	NA	1	1	0	0	0	0	0	0	0	0	0	0	0	0	0	0	0	0	0	0	0	0	0	0	0	0
SL240874	Early Relapse Multiple Myeloma	-0.0226966	-0.312929	No	Q2	-0.155471	-0.276264	HY	0	0	0	66	1945	0	NA	NA	NA	NA	NA	NA	NA	NA	NA	NA	NA	0	0	0	0	0	0	0	0	0	0	0	0	0	0	0	0	0	0	0	0	0	0	0	0
SL240875	Early Relapse Multiple Myeloma	-0.0870734	0.002262	No	Q1	-0.799419	0.0773579	CD1	1	0	0	57	1566	0	NA	NA	NA	NA	NA	NA	NA	NA	NA	3	2	0	0	0	0	0	0	0	0	0	0	0	0	0	0	0	0	0	0	0	0	0	0	0	0
SL240876	Early Relapse Multiple Myeloma	-0.324399	-0.0790573	No	Q2	-0.0448644	1.1028	MF	0	0	0	66	1622	0	NA	NA	NA	NA	NA	NA	NA	NA	NA	3	3	1	0	0	0	1	0	1	0	0	0	0	0	0	0	0	0	0	0	0	0	0	0	0	0
SL240877	Smoldering Multiple Myeloma	-0.105857	-0.267725	No	Q2	-0.203834	0.440236	HY	1	0	0	52	1993	0	1741	1	NA	NA	0	1	0	1	2	NA	NA	0	0	0	0	1	0	1	0	0	0	0	0	0	0	0	0	0	1	0	0	0	0	0	0
SL240878	Early Relapse Multiple Myeloma	-0.12014	-0.111152	No	Q2	-0.178663	0.717886	MF	1	NA	0	42	1786	0	NA	NA	NA	NA	NA	NA	NA	NA	NA	1	NA	NA	NA	NA	NA	NA	NA	NA	NA	NA	0	0	0	0	0	0	0	0	0	0	0	0	0	0	0
SL240879	MGUS	-0.12247	-0.280106	No	Q2	-0.217914	0.309462	LB	1	0	0	58	1754	0	NA	NA	NA	NA	NA	NA	NA	NA	NA	NA	NA	0	0	0	0	0	0	0	0	0	0	0	0	0	0	0	0	0	0	0	0	0	0	0	0
SL240880	Early Relapse Multiple Myeloma	-0.0855525	-0.149223	No	Q2	-0.0395668	0.303006	HY	0	0	0	67	1766	0	NA	NA	NA	NA	NA	NA	NA	NA	NA	NA	NA	0	0	0	0	0	0	0	0	0	0	0	0	0	0	0	0	0	0	0	0	0	0	0	0
SL240881	Early Relapse Multiple Myeloma	0.144096	-0.163126	Yes	Q3	0.345762	0.246017	PR	1	0	0	73	269	1	NA	NA	NA	NA	NA	NA	NA	NA	NA	3	3	0	0	0	0	1	1	1	1	1	0	0	0	0	0	0	0	0	0	0	0	0	0	0	0
SL240882	MGUS	-0.080135	-0.325691	No	Q2	0.0171174	-0.192471	LB	1	0	0	69	427	1	NA	NA	NA	NA	NA	NA	NA	NA	NA	NA	NA	0	0	0	0	1	0	1	0	0	0	0	0	0	0	0	0	0	0	0	0	0	0	0	0
SL240883	Early Relapse Multiple Myeloma	-0.0408178	-0.259442	No	Q2	0.134568	-0.0917	LB	1	0	0	62	2240	0	NA	NA	NA	NA	NA	NA	NA	NA	NA	1	1	0	0	0	0	1	0	1	0	0	0	0	0	0	0	0	0	0	1	0	0	0	1	0	0
SL240884	Early Relapse Multiple Myeloma	0.195467	-0.0940442	Yes	Q3	0.287346	-0.439416	LB	0	0	0	80	257	1	NA	NA	NA	NA	NA	NA	NA	NA	NA	2	2	0	0	0	0	1	0	1	0	0	0	0	0	0	0	0	0	0	0	0	0	0	0	0	0
SL240885	Late Relapse Multiple Myeloma	0.0977445	-4.24849e-05	Yes	Q3	0.492241	0.186595	CD2	0	0	0	75	141	1	NA	NA	NA	NA	NA	NA	NA	NA	NA	3	2	1	0	0	0	0	0	1	0	0	0	0	0	0	1	0	0	0	0	0	0	0	0	0	0
SL240886	Late Relapse Multiple Myeloma	0.0219014	-0.152502	Yes	Q3	-0.14658	-0.327537	PR	0	NA	1	56	222	1	NA	NA	NA	NA	NA	NA	NA	NA	NA	1	2	0	0	0	0	0	0	1	0	0	0	0	1	0	0	0	0	0	0	0	0	0	0	0	0
SL240887	MGUS	-0.0783892	0.193483	No	Q1	-0.0990172	0.560871	MF	0	0	0	67	420	0	NA	NA	NA	NA	NA	NA	NA	NA	NA	NA	NA	NA	NA	NA	NA	NA	NA	NA	NA	NA	0	0	0	0	0	0	0	0	0	0	0	0	0	0	0
SL240888	Early Relapse Multiple Myeloma	0.158817	-0.0855683	Yes	Q3	-0.0992443	-0.631709	HY	1	0	0	62	348	1	NA	NA	NA	NA	NA	NA	NA	NA	NA	2	2	0	0	0	0	0	1	0	0	0	0	0	0	0	0	0	0	0	0	0	0	1	0	0	0
SL240890	Early Relapse Multiple Myeloma	-0.324678	0.175187	No	Q1	0.222364	1.21165	MF	0	0	0	70	1104	0	NA	NA	NA	NA	NA	NA	NA	NA	NA	1	1	1	0	0	0	0	0	0	0	0	0	0	0	0	0	0	0	0	0	0	0	0	0	0	0
SL240891	Late Relapse Multiple Myeloma	-0.161924	0.326541	No	Q1	0.57332	1.15564	PR	1	1	0	57	1417	0	NA	NA	NA	NA	NA	NA	NA	NA	NA	2	2	0	0	0	0	0	0	1	0	0	0	0	0	0	0	0	0	0	0	0	0	0	0	0	0
SL240892	Early Relapse Multiple Myeloma	0.106233	0.102799	Yes	Q4	0.24022	-0.0537535	HY	1	0	1	56	1275	0	NA	NA	NA	NA	NA	NA	NA	NA	NA	NA	NA	0	0	0	0	1	1	1	1	1	0	0	0	0	0	0	0	0	0	0	0	0	0	0	0
SL240893	Late Relapse Multiple Myeloma	0.294128	0.0464385	Yes	Q4	0.621404	0.0881474	PR	0	0	0	68	60	1	NA	NA	NA	NA	NA	NA	NA	NA	NA	2	2	0	0	0	0	0	0	1	0	0	0	0	0	0	0	0	0	0	0	0	0	0	0	0	0
SL240894	Early Relapse Multiple Myeloma	-0.0560075	-0.284474	No	Q2	0.171794	-0.0120103	MS	1	0	0	54	645	1	NA	NA	NA	NA	NA	NA	NA	NA	NA	1	2	0	0	1	0	1	0	1	1	0	0	0	0	0	0	0	0	0	0	0	0	0	0	0	0
SL240895	Early Relapse Multiple Myeloma	-0.175693	0.281076	No	Q1	0.248439	0.91716	MF	0	0	0	73	826	1	NA	NA	NA	NA	NA	NA	NA	NA	NA	2	NA	NA	NA	NA	NA	NA	NA	NA	NA	NA	0	0	0	0	0	0	0	0	1	0	0	0	0	0	0
SL240896	Early Relapse Multiple Myeloma	-0.318959	0.141587	No	Q1	-0.272974	0.455926	MF	1	0	0	72	341	1	NA	NA	NA	NA	NA	NA	NA	NA	NA	1	NA	0	0	0	0	0	0	0	0	0	0	0	0	0	0	0	0	0	0	0	0	0	0	0	0
SL240897	Smoldering Multiple Myeloma	-0.440936	0.0919822	No	Q1	-0.0614727	0.482107	MS	0	0	0	64	1029	0	200	0	NA	NA	0	0	0	NA	1	NA	NA	0	0	0	0	0	0	0	0	0	0	0	0	0	0	0	0	0	0	0	0	0	0	0	0
SL240898	Newly Diagnosed Multiple Myeloma	-0.413431	0.0878459	No	Q1	-0.487685	0.266245	MF	1	0	0	55	1484	0	NA	NA	2454	0	NA	NA	NA	NA	NA	2	2	0	0	0	0	0	0	0	0	0	0	0	0	0	0	0	0	0	0	0	0	0	0	0	0
SL240899	Early Relapse Multiple Myeloma	-0.0570206	0.105293	No	Q1	0.112787	0.175925	LB	0	0	0	61	1175	0	NA	NA	NA	NA	NA	NA	NA	NA	NA	1	NA	0	0	0	0	0	0	1	0	0	0	0	0	0	0	0	0	0	0	0	0	0	0	0	0
SL240900	Newly Diagnosed Multiple Myeloma	-0.143439	0.183618	No	Q1	-0.203776	0.0694669	MF	1	0	0	42	1345	0	NA	NA	1312	0	NA	NA	NA	NA	NA	1	1	0	0	0	0	0	0	0	0	0	0	0	0	0	0	0	0	0	0	0	0	0	0	0	0
SL240901	MGUS	-0.259331	0.240909	No	Q1	0.291009	1.20333	MF	0	0	0	81	102	1	NA	NA	NA	NA	NA	NA	NA	NA	NA	NA	NA	NA	NA	NA	NA	NA	NA	NA	NA	NA	0	0	0	0	0	0	0	0	0	0	0	0	0	0	0
SL240902	Newly Diagnosed Multiple Myeloma	-0.279919	0.274316	No	Q1	0.373628	1.32652	MF	1	0	0	64	1242	0	NA	NA	1149	0	NA	NA	NA	NA	NA	NA	NA	0	0	0	0	0	0	0	0	0	0	0	0	0	0	0	0	0	0	0	0	0	0	0	0
SL240903	Late Relapse Multiple Myeloma	0.137093	0.216708	Yes	Q4	0.392744	0.209062	PR	1	0	0	61	322	1	NA	NA	NA	NA	NA	NA	NA	NA	NA	3	2	1	0	0	0	0	0	0	0	0	0	0	0	0	0	0	0	0	1	0	0	0	0	0	0
SL240904	MGUS	-0.11726	0.256436	No	Q1	0.529846	1.35963	MF	1	0	0	77	474	0	NA	NA	NA	NA	NA	NA	NA	NA	NA	NA	NA	0	0	0	0	0	0	0	0	0	0	0	0	0	0	0	0	0	0	0	0	0	0	0	0
SL240905	Early Relapse Multiple Myeloma	0.241325	-0.0854771	Yes	Q3	0.530436	-0.370121	CD2	0	0	0	78	107	1	NA	NA	NA	NA	NA	NA	NA	NA	NA	1	2	1	0	0	0	1	0	0	0	0	0	0	0	0	0	0	0	0	0	0	1	0	0	0	0
SL240906	Early Relapse Multiple Myeloma	0.285924	0.0029645	Yes	Q4	0.611562	0.139252	PR	0	0	1	67	43	1	NA	NA	NA	NA	NA	NA	NA	NA	NA	1	2	0	1	0	0	0	0	1	1	0	0	0	0	0	1	0	0	0	0	0	0	0	0	0	0
SL240907	Early Relapse Multiple Myeloma	0.274441	-0.00933485	Yes	Q3	0.847662	-0.129827	MF	1	0	0	69	145	1	NA	NA	NA	NA	NA	NA	NA	NA	NA	2	2	0	1	0	0	0	0	0	0	0	0	0	0	0	0	0	0	0	1	0	0	0	0	0	0
SL240909	Early Relapse Multiple Myeloma	-0.300857	0.271358	No	Q1	0.213565	1.15878	MF	1	1	0	63	1166	0	NA	NA	NA	NA	NA	NA	NA	NA	NA	1	1	0	0	0	0	0	0	0	0	0	0	0	0	0	0	0	0	0	0	0	0	0	0	0	0
SL240910	Late Relapse Multiple Myeloma	-0.189946	0.264749	No	Q1	0.183027	0.854214	MF	0	0	0	73	785	1	NA	NA	NA	NA	NA	NA	NA	NA	NA	1	NA	NA	NA	NA	NA	NA	NA	NA	NA	NA	0	0	0	0	0	0	0	0	0	0	0	0	0	0	0
SL240911	Early Relapse Multiple Myeloma	-0.0593409	0.128106	No	Q1	0.290344	0.340238	CD2	0	0	0	66	528	1	NA	NA	NA	NA	NA	NA	NA	NA	NA	NA	NA	0	0	0	0	0	0	1	0	0	0	0	0	0	0	0	0	0	0	0	0	0	0	0	0
SL240912	Smoldering Multiple Myeloma	0.128985	-0.249728	Yes	Q3	-0.0382374	-0.706815	HY	1	0	0	64	1297	0	477	1	NA	NA	0	0	1	2	2	NA	NA	0	0	0	0	1	0	0	0	0	0	0	0	0	0	0	0	0	0	0	0	0	0	0	0
SL240913	MGUS	-0.354559	0.255621	No	Q1	0.118587	1.17011	MF	1	0	0	>89	192	1	NA	NA	NA	NA	NA	NA	NA	NA	NA	NA	NA	NA	NA	NA	NA	NA	NA	NA	NA	NA	0	0	0	0	0	0	0	0	0	0	0	0	0	0	0
SL240914	MGUS	-0.364732	0.240655	No	Q1	-0.246861	0.732462	MF	0	0	0	69	0	0	NA	NA	NA	NA	NA	NA	NA	NA	NA	NA	NA	0	0	0	0	0	0	0	0	0	0	0	0	0	0	0	0	0	0	0	0	0	0	0	0
SL240915	Early Relapse Multiple Myeloma	0.0477382	0.0444975	Yes	Q4	0.0712998	-0.178249	HY	1	0	0	70	1205	0	NA	NA	NA	NA	NA	NA	NA	NA	NA	NA	NA	0	0	0	0	0	0	0	0	0	0	0	0	0	0	0	0	0	0	0	0	0	0	0	0
SL240916	MGUS	-0.033336	0.0754808	No	Q1	0.237469	0.0420512	HY	1	0	0	67	1238	0	NA	NA	NA	NA	NA	NA	NA	NA	NA	NA	NA	0	0	0	0	0	0	0	0	0	0	0	0	0	0	0	0	0	0	0	0	0	0	0	0
SL240917	Late Relapse Multiple Myeloma	0.0779164	-0.189556	Yes	Q3	0.0323421	-0.34813	CD2	1	NA	1	50	277	1	NA	NA	NA	NA	NA	NA	NA	NA	NA	2	2	1	0	0	0	0	0	0	0	0	0	0	0	0	0	0	0	0	0	0	1	0	0	0	0
SL240918	Late Relapse Multiple Myeloma	0.107546	-0.113191	Yes	Q3	-0.154682	-0.677233	HY	0	0	0	76	1614	0	NA	NA	NA	NA	NA	NA	NA	NA	NA	2	2	0	0	0	0	0	0	1	0	0	0	0	0	0	0	0	0	0	0	0	0	0	0	0	0
SL240919	Early Relapse Multiple Myeloma	-0.24375	0.14752	No	Q1	-0.0745162	0.647271	MF	1	0	1	70	1312	0	NA	NA	NA	NA	NA	NA	NA	NA	NA	2	2	0	0	0	0	0	0	0	0	0	0	0	0	0	0	0	0	0	0	0	0	0	0	0	0
SL240920	Smoldering Multiple Myeloma	0.20299	0.0818338	Yes	Q4	0.329222	-0.252301	LB	0	0	0	71	1345	0	882	1	NA	NA	1	0	0	2	2	NA	NA	0	0	0	0	0	0	1	0	0	0	0	0	0	0	0	0	0	0	0	0	0	0	0	0
SL240921	Late Relapse Multiple Myeloma	0.197337	0.0807737	Yes	Q4	0.529918	-0.43429	HY	1	1	0	56	1722	0	NA	NA	NA	NA	NA	NA	NA	NA	NA	1	1	0	0	0	0	0	0	1	0	0	0	0	0	0	0	0	0	0	0	0	0	0	0	0	0
SL240922	Early Relapse Multiple Myeloma	0.0472254	-0.0760513	Yes	Q3	-0.00369025	-0.513454	HY	1	1	0	61	1630	0	NA	NA	NA	NA	NA	NA	NA	NA	NA	NA	NA	NA	NA	NA	NA	NA	NA	NA	NA	NA	0	0	0	0	0	0	0	0	0	1	0	0	0	0	0
SL240923	Newly Diagnosed Multiple Myeloma	-0.108267	-0.100082	No	Q2	-0.403684	-0.540401	HY	0	0	0	72	1173	1	NA	NA	373	1	NA	NA	NA	NA	NA	2	2	0	0	0	0	0	0	0	0	0	0	0	1	0	0	0	0	0	0	0	0	0	0	0	0
SL240924	Early Relapse Multiple Myeloma	-0.134049	-0.0238551	No	Q2	-0.0880306	-0.120031	CD2	1	0	1	82	1144	0	NA	NA	NA	NA	NA	NA	NA	NA	NA	3	2	1	0	0	0	0	0	0	0	0	0	0	0	0	0	0	0	0	0	0	0	0	0	0	0
SL240925	MGUS	-0.417974	0.229219	No	Q1	-0.159967	0.74159	MF	0	NA	0	70	1542	0	NA	NA	NA	NA	NA	NA	NA	NA	NA	NA	NA	0	0	0	0	0	0	0	0	0	0	0	0	0	0	0	0	0	0	0	0	0	0	0	0
SL240926	Early Relapse Multiple Myeloma	-0.171778	0.301838	No	Q1	0.526585	1.20381	MF	0	0	0	70	148	1	NA	NA	NA	NA	NA	NA	NA	NA	NA	1	2	0	0	0	0	0	0	0	0	0	0	0	0	0	0	0	0	0	1	0	0	1	0	0	0
SL240927	Late Relapse Multiple Myeloma	-0.134457	0.237576	No	Q1	0.415196	0.419078	CD2	1	0	0	61	467	1	NA	NA	NA	NA	NA	NA	NA	NA	NA	3	2	1	0	0	0	0	0	0	0	0	0	0	0	0	0	0	0	0	1	0	0	0	0	0	0
SL240928	Newly Diagnosed Multiple Myeloma	-0.221364	0.368694	No	Q1	0.226484	0.840267	MF	0	0	0	50	1238	0	NA	NA	1856	1	NA	NA	NA	NA	NA	1	1	0	0	0	0	0	0	0	0	0	0	0	0	0	0	0	0	0	0	0	0	0	0	0	0
SL240929	Late Relapse Multiple Myeloma	0.310437	-0.101908	Yes	Q3	0.307195	-0.524637	CD2	0	0	0	68	406	1	NA	NA	NA	NA	NA	NA	NA	NA	NA	2	2	1	0	0	0	0	0	1	0	0	0	0	0	0	1	0	0	0	0	0	0	0	0	0	0
SL240930	Early Relapse Multiple Myeloma	0.329914	0.223184	Yes	Q4	0.686771	0.00058643	PR	0	0	0	66	351	1	NA	NA	NA	NA	NA	NA	NA	NA	NA	3	3	0	0	0	0	1	0	1	0	0	0	0	0	0	0	0	0	0	0	0	0	0	0	0	0
SL240931	Smoldering Multiple Myeloma	-0.311751	0.0392102	No	Q1	-0.0195443	-0.0066686	MS	1	0	0	66	1609	0	2779	0	NA	NA	0	0	0	1	1	NA	NA	0	0	1	0	1	0	0	0	0	0	0	0	0	0	0	0	0	0	0	0	0	0	0	0
SL240932	Late Relapse Multiple Myeloma	0.319892	-0.123085	Yes	Q3	0.529295	-0.401615	PR	0	0	0	60	137	1	NA	NA	NA	NA	NA	NA	NA	NA	NA	2	2	1	0	0	0	1	0	1	0	0	0	0	0	0	0	0	0	0	0	0	0	0	0	0	0
SL240933	MGUS	-0.329478	0.0849988	No	Q1	0.0489307	0.484371	MS	1	0	0	64	1470	0	NA	NA	NA	NA	NA	NA	NA	NA	NA	NA	NA	0	0	0	0	1	0	1	0	0	0	0	0	0	0	0	0	0	0	0	0	0	0	0	0
SL240934	Early Relapse Multiple Myeloma	-0.00163665	0.0864599	No	Q1	0.238634	0.342889	CD2	0	0	0	42	935	1	NA	NA	NA	NA	NA	NA	NA	NA	NA	1	1	1	0	0	0	0	0	1	0	0	0	0	0	0	0	0	0	0	0	0	0	0	0	0	0
SL240935	Late Relapse Multiple Myeloma	0.426006	0.027844	Yes	Q4	0.656346	-0.893267	PR	0	0	0	60	72	1	NA	NA	NA	NA	NA	NA	NA	NA	NA	3	2	1	0	0	0	1	0	1	0	0	0	0	0	0	0	0	0	0	0	0	0	0	0	0	0
SL240936	MGUS	-0.130156	-0.0464107	No	Q2	-0.180679	-0.337427	LB	1	0	0	66	1232	0	NA	NA	NA	NA	NA	NA	NA	NA	NA	NA	NA	0	0	0	0	1	0	0	0	0	0	0	0	0	0	0	0	0	0	0	0	0	0	0	0
SL240937	Early Relapse Multiple Myeloma	-0.108854	0.352892	No	Q1	0.139645	0.716547	MF	0	0	0	69	1336	0	NA	NA	NA	NA	NA	NA	NA	NA	NA	NA	NA	0	0	0	0	0	0	0	0	0	0	0	0	0	0	0	0	0	0	0	0	0	0	0	0
SL240938	Newly Diagnosed Multiple Myeloma	0.226079	-0.0292424	Yes	Q3	-0.0854052	-0.692865	CD2	0	0	0	75	829	0	NA	NA	750	0	NA	NA	NA	NA	NA	2	2	1	0	0	0	0	0	0	0	0	0	0	0	0	0	0	0	0	0	0	0	0	0	0	0
SL240939	Early Relapse Multiple Myeloma	0.00515232	0.260013	Yes	Q4	0.400415	0.503982	CD1	0	0	0	78	382	1	NA	NA	NA	NA	NA	NA	NA	NA	NA	2	2	1	0	0	0	0	0	0	0	0	0	0	0	0	0	0	0	0	0	0	0	0	0	0	0
SL240940	Newly Diagnosed Multiple Myeloma	0.380469	-0.0277463	Yes	Q3	0.589658	-0.522828	CD2	1	0	0	83	947	1	NA	NA	924	1	NA	NA	NA	NA	NA	2	2	1	0	0	0	1	0	0	0	0	0	0	0	0	0	0	0	0	0	0	0	0	0	0	0
SL240941	Late Relapse Multiple Myeloma	0.403775	0.0851589	Yes	Q4	0.65328	-0.507888	PR	1	0	1	47	178	1	NA	NA	NA	NA	NA	NA	NA	NA	NA	3	3	0	0	0	0	1	0	1	0	0	0	0	0	0	0	0	0	0	0	0	0	0	0	0	0
SL240942	Early Relapse Multiple Myeloma	0.462034	-0.0210171	Yes	Q3	1.12575	-0.285883	PR	0	0	0	57	1701	0	NA	NA	NA	NA	NA	NA	NA	NA	NA	1	2	0	0	0	1	0	1	1	1	0	0	0	0	0	0	0	0	0	1	1	0	0	0	0	0
SL240943	Early Relapse Multiple Myeloma	0.145784	0.0365035	Yes	Q4	0.519865	-0.307763	LB	0	0	0	87	632	1	NA	NA	NA	NA	NA	NA	NA	NA	NA	1	1	0	0	0	0	1	0	1	0	0	0	0	0	0	0	0	0	0	0	0	0	0	0	0	0
SL240944	Early Relapse Multiple Myeloma	0.0202104	0.021258	Yes	Q4	0.216808	0.180932	HY	1	0	0	70	1428	1	NA	NA	NA	NA	NA	NA	NA	NA	NA	1	1	0	0	0	0	0	0	1	0	0	0	0	0	0	0	0	0	0	0	0	0	0	0	0	0
SL240945	Early Relapse Multiple Myeloma	0.266766	0.0824119	Yes	Q4	0.522276	-0.157178	CD2	0	0	0	75	1284	0	NA	NA	NA	NA	NA	NA	NA	NA	NA	3	3	1	0	0	0	0	0	1	0	0	0	0	0	0	0	0	0	0	0	0	1	0	0	0	0
SL240946	Smoldering Multiple Myeloma	-0.0540909	0.111547	No	Q1	0.277906	0.184536	CD2	0	0	0	66	1266	0	13	0	NA	NA	0	0	0	2	1	NA	NA	1	0	0	0	1	0	0	0	0	0	0	0	0	0	0	0	0	0	0	0	0	0	0	0
SL240947	Newly Diagnosed Multiple Myeloma	0.131678	-0.128191	Yes	Q3	-0.0304436	-0.890871	CD2	1	1	0	73	1145	0	NA	NA	1155	0	NA	NA	NA	NA	NA	NA	NA	0	0	0	0	0	0	1	0	0	0	0	0	0	0	0	0	0	0	0	0	0	0	0	0
SL240948	Newly Diagnosed Multiple Myeloma	0.014229	-0.181406	Yes	Q3	-0.407545	-0.88433	MS	0	0	0	69	84	1	NA	NA	10	1	NA	NA	NA	NA	NA	1	2	0	0	1	0	0	0	1	1	0	0	0	0	0	0	0	0	0	0	0	0	0	0	0	0
SL240949	Smoldering Multiple Myeloma	0.09297	-0.0672963	Yes	Q3	0.598242	-0.0665053	MS	1	0	0	85	1064	0	407	1	NA	NA	1	1	1	NA	3	NA	NA	0	0	1	0	1	0	1	1	0	0	0	0	0	0	0	0	0	0	0	0	0	0	0	1
SL240950	Early Relapse Multiple Myeloma	0.284802	-0.126073	Yes	Q3	0.256466	-0.655489	CD2	0	0	0	69	1478	0	NA	NA	NA	NA	NA	NA	NA	NA	NA	1	2	1	0	0	0	0	1	1	1	0	0	0	0	0	0	0	0	0	0	0	0	0	0	0	0
SL240951	Early Relapse Multiple Myeloma	0.290955	-0.0211945	Yes	Q3	0.69437	-0.329655	LB	0	0	0	64	1162	0	NA	NA	NA	NA	NA	NA	NA	NA	NA	NA	NA	0	0	0	1	1	0	1	0	0	0	0	0	0	0	0	0	1	0	0	0	0	0	0	0
SL240952	Early Relapse Multiple Myeloma	0.477569	0.0401599	Yes	Q4	0.902704	-0.57442	PR	0	0	0	62	25	1	NA	NA	NA	NA	NA	NA	NA	NA	NA	2	2	0	0	0	1	1	1	0	1	0	0	0	0	0	0	0	0	0	0	0	0	0	0	0	0
SL240953	Early Relapse Multiple Myeloma	0.343865	0.136353	Yes	Q4	0.770612	-0.519307	PR	0	0	0	64	81	1	NA	NA	NA	NA	NA	NA	NA	NA	NA	2	2	0	0	0	0	1	1	1	1	1	0	0	0	0	0	0	0	0	0	0	0	0	0	0	0
SL240954	Late Relapse Multiple Myeloma	0.352156	0.0998588	Yes	Q4	0.93172	-0.0449383	MS	1	0	0	59	86	1	NA	NA	NA	NA	NA	NA	NA	NA	NA	1	2	0	0	1	0	1	0	1	1	0	0	0	0	0	0	0	0	0	0	0	0	0	0	0	0
SL240955	Early Relapse Multiple Myeloma	0.358607	0.142369	Yes	Q4	0.897442	-0.54409	CD1	0	0	0	53	381	1	NA	NA	NA	NA	NA	NA	NA	NA	NA	2	2	0	1	0	0	1	1	0	1	0	0	0	0	0	0	0	0	0	0	0	0	0	0	0	0
SL240956	Early Relapse Multiple Myeloma	0.493275	0.187948	Yes	Q4	1.26685	-0.178823	PR	0	0	0	54	11	1	NA	NA	NA	NA	NA	NA	NA	NA	NA	3	NA	NA	NA	NA	NA	NA	NA	NA	NA	NA	0	0	0	0	1	0	0	0	1	0	1	0	0	0	0
SL240957	Early Relapse Multiple Myeloma	0.300407	0.0391024	Yes	Q4	0.606051	-0.55613	CD1	0	1	0	62	10	1	NA	NA	NA	NA	NA	NA	NA	NA	NA	3	3	1	0	0	0	0	0	0	0	0	0	0	0	0	0	0	0	0	0	0	0	0	0	0	0
SL240958	Early Relapse Multiple Myeloma	0.473948	0.10329	Yes	Q4	0.921758	-0.206691	PR	1	0	0	43	167	1	NA	NA	NA	NA	NA	NA	NA	NA	NA	2	2	0	0	1	0	0	0	1	1	0	0	0	0	0	0	0	0	0	0	0	0	0	0	0	0
SL240959	Late Relapse Multiple Myeloma	0.229691	-0.0454164	Yes	Q3	0.504382	0.00111481	LB	0	NA	0	61	210	1	NA	NA	NA	NA	NA	NA	NA	NA	NA	1	1	0	0	0	0	0	0	1	0	0	0	0	0	1	0	0	0	0	0	0	0	0	0	0	0
SL240960	Newly Diagnosed Multiple Myeloma	0.44339	-0.0741459	Yes	Q3	0.270714	-0.881829	HY	0	0	0	86	859	1	NA	NA	251	1	NA	NA	NA	NA	NA	3	2	0	0	0	0	0	0	1	0	0	0	0	0	0	0	0	0	0	0	0	0	0	0	0	0
SL240961	Late Relapse Multiple Myeloma	0.324934	-0.0517482	Yes	Q3	0.660258	-0.477533	HY	0	0	0	75	125	1	NA	NA	NA	NA	NA	NA	NA	NA	NA	2	2	0	0	0	0	0	0	1	0	0	0	0	0	0	0	0	0	0	0	0	0	0	0	0	0
SL240962	Late Relapse Multiple Myeloma	0.455373	0.11579	Yes	Q4	0.88901	-0.0711349	PR	1	0	0	55	14	1	NA	NA	NA	NA	NA	NA	NA	NA	NA	NA	NA	0	0	0	0	0	1	1	1	1	0	0	0	0	0	0	0	0	0	0	0	0	0	0	0
SL240963	Late Relapse Multiple Myeloma	0.422451	-0.0547564	Yes	Q3	0.729884	-0.653966	PR	0	0	0	72	93	1	NA	NA	NA	NA	NA	NA	NA	NA	NA	3	3	0	0	0	0	0	1	1	1	0	0	0	0	0	0	0	0	0	0	0	0	0	0	0	0
SL240964	Early Relapse Multiple Myeloma	0.394759	0.160776	Yes	Q4	0.716497	-0.384548	PR	0	0	0	63	39	1	NA	NA	NA	NA	NA	NA	NA	NA	NA	NA	NA	0	1	0	1	1	1	1	1	1	0	0	0	0	0	0	0	0	0	0	0	0	0	0	0
SL242309	Late Relapse Multiple Myeloma	-0.193789	0.281023	No	Q1	0.169509	0.891265	MF	1	0	0	55	1282	0	NA	NA	NA	NA	NA	NA	NA	NA	NA	NA	NA	1	0	0	0	0	0	0	0	0	0	0	0	0	0	0	0	0	0	0	0	0	0	0	0
SL242310	Newly Diagnosed Multiple Myeloma	-0.173812	0.341014	No	Q1	-0.445653	0.299768	MF	0	0	0	65	1266	0	NA	NA	1258	0	NA	NA	NA	NA	NA	1	2	0	0	1	0	1	1	0	1	0	0	0	0	0	1	0	0	0	0	0	0	0	0	0	0
SL242321	Smoldering Multiple Myeloma	-0.438145	0.199249	No	Q1	-0.276284	0.644208	MF	0	0	0	47	797	0	52	0	NA	NA	0	1	0	2	2	NA	NA	0	0	0	0	1	0	1	0	0	0	0	0	0	0	0	0	0	0	0	0	0	0	0	0
SL242322	MGUS	-0.259036	0.257086	No	Q1	0.224292	1.20556	MF	1	0	0	78	1136	0	NA	NA	NA	NA	NA	NA	NA	NA	NA	NA	NA	0	0	0	0	0	0	0	0	0	0	0	0	0	0	0	0	0	0	0	0	0	0	0	0
SL242323	Early Relapse Multiple Myeloma	-0.0511258	0.201832	No	Q1	0.563364	1.02487	MF	1	0	0	60	1253	0	NA	NA	NA	NA	NA	NA	NA	NA	NA	NA	NA	0	0	0	0	0	0	0	0	0	0	0	0	0	0	0	0	0	0	0	0	0	0	0	0
SL242325	MGUS	-0.281313	0.205679	No	Q1	-0.402957	0.211703	MF	0	0	1	66	664	0	NA	NA	NA	NA	NA	NA	NA	NA	NA	NA	NA	0	0	0	0	0	0	0	0	0	0	0	0	0	0	0	0	0	0	0	0	0	0	0	0
SL242327	Late Relapse Multiple Myeloma	-0.0396564	0.387016	No	Q1	0.698226	1.36981	MF	0	0	0	71	90	1	NA	NA	NA	NA	NA	NA	NA	NA	NA	2	NA	NA	NA	NA	NA	NA	NA	NA	NA	NA	0	0	0	0	0	0	0	0	0	0	0	0	0	0	0
SL242333	Newly Diagnosed Multiple Myeloma	-0.149533	0.321578	No	Q1	-0.141168	-0.325663	HY	0	0	0	69	917	0	NA	NA	899	0	NA	NA	NA	NA	NA	2	2	0	0	0	0	0	0	0	0	0	0	0	0	0	0	0	0	0	1	0	0	0	0	0	0
SL242334	Early Relapse Multiple Myeloma	-0.219249	0.221561	No	Q1	-0.00762534	0.752082	MF	0	0	0	74	1263	0	NA	NA	NA	NA	NA	NA	NA	NA	NA	1	1	0	0	0	0	0	0	0	0	0	0	0	0	0	0	0	0	0	0	0	0	0	0	0	0
SL242335	Early Relapse Multiple Myeloma	-0.256436	0.19433	No	Q1	-0.256729	0.333735	HY	0	0	0	73	770	1	NA	NA	NA	NA	NA	NA	NA	NA	NA	NA	NA	0	0	0	0	0	0	0	0	0	0	0	0	0	0	0	0	0	0	0	0	0	0	0	0
SL242336	Late Relapse Multiple Myeloma	0.340372	-0.00333373	Yes	Q3	0.358572	-0.42153	PR	1	0	0	69	108	1	NA	NA	NA	NA	NA	NA	NA	NA	NA	1	2	1	0	0	0	1	1	1	1	0	0	0	0	0	0	0	0	0	0	0	0	0	0	0	1
SL242337	MGUS	-0.321812	0.093425	No	Q1	-0.24206	0.332617	MF	1	0	0	66	108	0	NA	NA	NA	NA	NA	NA	NA	NA	NA	NA	NA	0	0	0	0	0	0	0	0	0	0	0	0	0	0	0	0	0	0	0	0	0	0	0	0
SL242345	Early Relapse Multiple Myeloma	-0.309602	0.0846679	No	Q1	-0.495295	0.131173	MF	0	0	0	59	1150	0	NA	NA	NA	NA	NA	NA	NA	NA	NA	3	2	0	0	0	0	0	0	0	0	0	0	0	0	0	0	0	0	0	0	0	0	0	0	0	0
SL242357	MGUS	-0.265431	0.0898775	No	Q1	-0.0937869	0.181398	MF	1	0	0	79	37	0	NA	NA	NA	NA	NA	NA	NA	NA	NA	NA	NA	0	0	0	0	0	0	0	0	0	0	0	0	0	0	0	0	0	0	0	0	0	0	0	0
SL242358	Newly Diagnosed Multiple Myeloma	-0.441538	0.115122	No	Q1	-0.800659	-0.236984	CD2	0	0	0	60	832	0	NA	NA	206	1	NA	NA	NA	NA	NA	2	NA	1	0	0	0	0	0	0	0	0	0	0	0	0	0	0	0	0	0	0	0	0	0	0	0
SL242359	Early Relapse Multiple Myeloma	-0.128935	0.11579	No	Q1	-0.257509	-0.315943	HY	0	0	0	70	710	0	NA	NA	NA	NA	NA	NA	NA	NA	NA	NA	NA	NA	NA	NA	NA	NA	NA	NA	NA	NA	0	0	0	0	0	0	0	0	0	0	0	0	0	0	0
SL242369	Early Relapse Multiple Myeloma	0.0741993	0.319741	Yes	Q4	0.664876	0.441938	PR	1	0	0	81	1044	0	NA	NA	NA	NA	NA	NA	NA	NA	NA	2	NA	NA	NA	NA	NA	NA	NA	NA	NA	NA	0	0	0	0	0	0	0	0	0	0	0	0	0	0	0
SL242370	Smoldering Multiple Myeloma	-0.150912	0.088091	No	Q1	0.0767114	-0.0058778	HY	0	0	0	68	1200	0	1018	0	NA	NA	0	0	0	2	1	NA	NA	0	0	0	0	1	0	0	0	0	0	0	0	0	1	0	0	0	0	0	0	0	0	0	0
SL242371	Early Relapse Multiple Myeloma	-0.310178	0.0525832	No	Q1	-0.72417	-0.173763	MS	0	0	0	50	1190	0	NA	NA	NA	NA	NA	NA	NA	NA	NA	NA	NA	0	0	0	0	1	0	0	0	0	0	0	0	0	0	0	0	0	0	0	0	0	0	0	0
SL242372	Smoldering Multiple Myeloma	-0.038127	-0.0401318	No	Q2	-0.190878	-0.66374	HY	1	1	0	59	1193	0	2146	1	NA	NA	1	0	1	2	3	NA	NA	0	0	0	0	0	0	0	0	0	0	0	0	0	0	0	0	0	0	0	0	0	0	0	0
SL242373	Early Relapse Multiple Myeloma	0.402879	0.106258	Yes	Q4	0.87881	-0.013209	PR	0	0	0	68	179	1	NA	NA	NA	NA	NA	NA	NA	NA	NA	2	2	0	0	0	0	0	1	1	1	1	0	0	0	0	0	0	0	0	0	0	0	0	0	0	0
SL242374	Early Relapse Multiple Myeloma	-0.0928983	0.0435264	No	Q1	0.0741476	-0.161659	MS	1	0	0	55	61	1	NA	NA	NA	NA	NA	NA	NA	NA	NA	1	2	0	0	1	0	1	0	1	1	0	0	0	0	0	0	0	0	0	0	0	0	0	0	0	0
SL242375	Newly Diagnosed Multiple Myeloma	-0.390192	-0.0301593	No	Q2	-0.617478	-0.106575	CD2	0	0	0	54	1260	0	NA	NA	60	1	NA	NA	NA	NA	NA	1	1	1	0	0	0	0	0	0	0	0	0	0	0	0	0	0	0	0	0	0	0	0	0	0	0
SL242381	MGUS	-0.408601	-0.0587956	No	Q2	-0.443645	0.162243	MF	1	0	0	55	934	0	NA	NA	NA	NA	NA	NA	NA	NA	NA	NA	NA	0	0	0	0	0	0	0	0	0	0	0	0	0	0	0	0	0	0	0	0	0	0	0	0
SL242383	MGUS	-0.36614	0.102879	No	Q1	-0.335724	0.526815	MF	1	0	1	56	0	0	NA	NA	NA	NA	NA	NA	NA	NA	NA	NA	NA	0	0	0	0	0	0	0	0	0	0	0	0	0	0	0	0	0	0	0	0	0	0	0	0
SL242393	Early Relapse Multiple Myeloma	0.323069	0.107175	Yes	Q4	0.798584	-0.209341	CD1	0	0	0	77	792	1	NA	NA	NA	NA	NA	NA	NA	NA	NA	NA	NA	1	0	0	0	1	1	1	1	0	0	0	0	0	0	0	1	0	1	0	0	0	0	0	0
SL242394	Early Relapse Multiple Myeloma	0.185977	0.00518285	Yes	Q4	0.385232	-0.432267	LB	1	0	0	71	311	1	NA	NA	NA	NA	NA	NA	NA	NA	NA	1	2	0	0	0	0	1	1	1	1	0	0	0	0	0	0	0	0	0	0	0	0	0	0	0	0
SL242395	Early Relapse Multiple Myeloma	0.19265	0.186461	Yes	Q4	0.683958	0.0213841	MF	1	0	0	73	969	0	NA	NA	NA	NA	NA	NA	NA	NA	NA	2	2	0	1	0	0	0	0	1	1	0	0	0	0	0	0	0	0	0	1	0	0	0	0	0	0
SL242396	Late Relapse Multiple Myeloma	0.331763	0.0231288	Yes	Q4	0.443419	-0.692566	PR	0	NA	1	53	228	1	NA	NA	NA	NA	NA	NA	NA	NA	NA	NA	NA	0	0	0	0	1	1	1	1	0	0	0	0	0	0	0	0	0	0	0	0	0	0	1	0
SL242397	Early Relapse Multiple Myeloma	-0.00632329	0.11457	No	Q1	0.210793	0.161054	MS	0	0	0	81	1180	0	NA	NA	NA	NA	NA	NA	NA	NA	NA	1	2	0	0	1	0	1	0	1	1	0	0	0	0	0	0	0	0	0	0	0	0	0	0	1	0
SL242398	Early Relapse Multiple Myeloma	-0.318624	0.11531	No	Q1	-0.15507	0.462059	MF	0	0	0	77	1134	0	NA	NA	NA	NA	NA	NA	NA	NA	NA	NA	NA	0	0	0	0	0	0	0	0	0	0	0	0	0	0	0	0	0	0	0	0	0	0	0	0
SL242399	Early Relapse Multiple Myeloma	0.1937	0.011448	Yes	Q4	0.529451	-0.387984	LB	1	0	1	51	1124	0	NA	NA	NA	NA	NA	NA	NA	NA	NA	NA	NA	0	0	0	0	0	0	1	0	0	0	0	0	0	0	0	0	0	1	0	0	0	0	0	0
SL242400	Newly Diagnosed Multiple Myeloma	-0.0508641	-0.0592793	No	Q2	-0.124002	-0.431561	LB	0	0	0	80	775	1	NA	NA	749	1	NA	NA	NA	NA	NA	3	3	0	0	0	0	0	0	0	0	0	0	0	0	0	0	0	0	0	0	0	0	0	0	0	0
SL242401	Early Relapse Multiple Myeloma	0.396455	0.0790967	Yes	Q4	1.12629	-0.0763296	CD1	1	0	0	71	175	1	NA	NA	NA	NA	NA	NA	NA	NA	NA	2	2	1	0	0	0	0	0	1	0	0	0	0	0	0	0	0	0	0	0	0	0	0	0	0	0
SL242402	Newly Diagnosed Multiple Myeloma	0.208174	0.203547	Yes	Q4	0.627394	-0.00277007	LB	1	0	0	83	76	1	NA	NA	64	1	NA	NA	NA	NA	NA	2	2	0	0	0	0	0	0	0	0	0	0	0	0	0	0	0	0	0	0	0	0	0	0	0	0
SL250107	Late Relapse Multiple Myeloma	0.036023	0.300151	Yes	Q4	-0.511406	0.0185043	PR	0	0	0	62	86	1	NA	NA	NA	NA	NA	NA	NA	NA	NA	1	2	0	0	0	0	0	0	0	0	0	0	0	0	0	0	0	0	0	0	0	0	0	0	0	0
SL250118	Early Relapse Multiple Myeloma	0.167931	0.137721	Yes	Q4	0.0649856	-0.0722474	CD1	0	0	0	61	937	1	NA	NA	NA	NA	NA	NA	NA	NA	NA	NA	NA	0	0	0	0	0	0	0	0	0	0	0	0	0	0	0	0	0	1	0	1	0	0	0	0
SL250119	Early Relapse Multiple Myeloma	-0.0325227	0.068902	No	Q1	-0.123063	-0.220745	HY	0	0	0	62	1154	0	NA	NA	NA	NA	NA	NA	NA	NA	NA	1	1	0	0	0	0	0	0	0	0	0	0	0	0	0	0	0	0	0	0	0	0	0	0	0	0
SL250130	Early Relapse Multiple Myeloma	-0.145959	0.167216	No	Q1	0.135908	0.405353	CD2	1	NA	0	64	823	0	NA	NA	NA	NA	NA	NA	NA	NA	NA	3	2	1	0	0	0	0	0	0	0	0	0	0	0	0	0	0	0	0	0	0	0	0	0	0	0
SL250142	Early Relapse Multiple Myeloma	-0.148757	0.317585	No	Q1	0.433559	1.24081	MF	0	0	0	43	1120	0	NA	NA	NA	NA	NA	NA	NA	NA	NA	1	1	0	0	0	0	0	0	0	0	0	0	0	0	0	0	0	0	0	0	0	0	0	0	0	0
SL250146	Early Relapse Multiple Myeloma	-0.00344779	0.27685	No	Q1	0.190104	0.115482	LB	0	0	0	73	1022	1	NA	NA	NA	NA	NA	NA	NA	NA	NA	NA	NA	0	0	0	0	1	0	1	0	0	0	0	0	0	0	0	0	0	0	0	0	0	0	0	0
SL250173	Late Relapse Multiple Myeloma	-0.0470057	0.227401	No	Q1	0.434495	0.334984	MF	0	0	0	69	499	1	NA	NA	NA	NA	NA	NA	NA	NA	NA	2	2	1	0	0	0	1	0	1	0	0	0	0	0	0	0	0	0	0	0	0	0	0	0	0	0
SL250183	Late Relapse Multiple Myeloma	-0.0831147	0.376258	No	Q1	0.707803	1.32254	MF	0	0	0	63	78	1	NA	NA	NA	NA	NA	NA	NA	NA	NA	2	2	0	0	0	0	0	0	0	0	0	0	0	0	0	0	0	0	0	0	0	0	0	0	0	0
SL250184	Late Relapse Multiple Myeloma	-0.0644932	0.0499004	No	Q1	0.0914011	-0.231685	MS	0	1	0	61	177	1	NA	NA	NA	NA	NA	NA	NA	NA	NA	NA	NA	0	0	1	0	0	0	1	1	0	0	0	0	0	0	0	1	0	0	0	0	0	0	0	0
SL253572	Late Relapse Multiple Myeloma	0.0143662	-0.0852466	Yes	Q3	-0.293651	0.103212	CD2	0	0	0	75	255	1	NA	NA	NA	NA	NA	NA	NA	NA	NA	1	1	1	0	0	0	0	0	1	0	0	0	0	1	0	1	0	0	0	0	0	0	0	0	0	0
SL253573	Late Relapse Multiple Myeloma	-0.0410313	0.0911745	No	Q1	-0.642205	0.376523	MF	0	0	0	52	488	1	NA	NA	NA	NA	NA	NA	NA	NA	NA	NA	NA	0	0	1	0	1	1	0	1	1	0	0	1	0	0	0	0	0	0	0	0	0	0	0	0
SL253574	Late Relapse Multiple Myeloma	0.037167	-0.00554322	Yes	Q3	0.0228461	0.0623739	LB	1	0	0	71	608	1	NA	NA	NA	NA	NA	NA	NA	NA	NA	3	3	0	0	0	0	1	0	1	0	0	0	0	0	0	0	0	0	0	0	0	0	0	0	0	1
SL253595	Early Relapse Multiple Myeloma	-0.122852	0.167618	No	Q1	-0.00289427	1.12602	MF	0	NA	0	59	1883	0	NA	NA	NA	NA	NA	NA	NA	NA	NA	3	3	0	0	0	0	0	0	0	0	0	0	0	0	0	0	0	0	0	0	0	0	0	0	0	0
SL253596	Early Relapse Multiple Myeloma	-0.186923	0.073345	No	Q1	-0.592256	0.949365	MF	1	1	0	38	2085	0	NA	NA	NA	NA	NA	NA	NA	NA	NA	1	1	0	0	0	0	0	0	0	0	0	0	0	0	0	0	0	0	0	0	0	0	0	0	0	0
SL253597	MGUS	-0.134293	-0.131493	No	Q2	-0.994615	0.238021	MF	0	0	0	79	19	0	NA	NA	NA	NA	NA	NA	NA	NA	NA	NA	NA	0	0	0	0	0	0	0	0	0	0	0	0	0	0	0	0	0	0	0	0	0	0	0	0
SL253598	Early Relapse Multiple Myeloma	-0.14558	0.172877	No	Q1	-1.27812	0.119254	MF	1	0	0	67	1796	0	NA	NA	NA	NA	NA	NA	NA	NA	NA	3	2	0	0	0	0	0	0	0	0	0	0	0	0	0	0	0	0	0	0	0	0	0	0	0	0
SL253599	MGUS	-0.167482	-0.0253315	No	Q2	-0.638161	0.562004	MF	1	0	0	59	299	0	NA	NA	NA	NA	NA	NA	NA	NA	NA	NA	NA	0	0	0	0	0	0	0	0	0	0	0	0	0	0	0	0	0	0	0	0	0	0	0	0
SL253600	Early Relapse Multiple Myeloma	-0.146472	0.0228602	No	Q1	-0.468645	0.575538	CD2	0	0	0	72	1986	0	NA	NA	NA	NA	NA	NA	NA	NA	NA	1	NA	NA	NA	NA	NA	NA	NA	NA	NA	NA	0	0	0	0	0	0	0	0	0	0	0	0	0	0	0
SL253601	MGUS	-0.142865	0.0196317	No	Q1	-0.47919	0.92656	MF	1	0	0	82	530	0	NA	NA	NA	NA	NA	NA	NA	NA	NA	NA	NA	0	0	0	0	0	0	0	0	0	0	0	0	0	0	0	0	0	0	0	0	0	0	0	0
SL253602	Late Relapse Multiple Myeloma	-0.202626	0.312687	No	Q1	-0.470155	0.434184	MF	0	0	0	54	746	1	NA	NA	NA	NA	NA	NA	NA	NA	NA	NA	NA	0	0	0	0	0	0	0	0	0	0	0	0	0	0	0	0	0	0	0	0	0	0	0	0
SL257980	Late Relapse Multiple Myeloma	0.109545	0.310265	Yes	Q4	0.336516	1.11097	PR	0	0	0	62	44	1	NA	NA	NA	NA	NA	NA	NA	NA	NA	1	2	0	0	0	0	0	1	1	1	0	0	0	0	0	0	0	0	0	0	0	0	0	0	0	0
SL258022	Late Relapse Multiple Myeloma	0.161651	0.267012	Yes	Q4	0.89713	0.979668	PR	0	1	0	64	234	1	NA	NA	NA	NA	NA	NA	NA	NA	NA	1	1	0	0	0	1	0	0	1	0	0	0	0	0	0	0	0	0	0	0	0	0	0	0	0	0
SL258023	MGUS	-0.431267	0.0879136	No	Q1	-0.212446	0.536086	MF	0	0	0	70	1105	0	NA	NA	NA	NA	NA	NA	NA	NA	NA	NA	NA	0	0	0	0	0	0	0	0	0	0	0	0	0	0	0	0	0	0	0	0	0	0	0	0
SL258024	Late Relapse Multiple Myeloma	-0.0841245	0.249491	No	Q1	0.412403	0.518864	MF	1	0	0	61	1067	1	NA	NA	NA	NA	NA	NA	NA	NA	NA	1	NA	NA	NA	NA	NA	NA	NA	NA	NA	NA	0	0	0	0	0	0	0	0	0	0	0	0	0	0	1
SL258025	Early Relapse Multiple Myeloma	0.0863438	0.0653986	Yes	Q4	0.403057	0.459138	CD2	0	0	0	63	1110	0	NA	NA	NA	NA	NA	NA	NA	NA	NA	1	2	1	0	0	0	1	0	0	0	0	0	0	0	0	0	0	0	0	0	0	0	0	0	0	0
SL258026	Newly Diagnosed Multiple Myeloma	0.0722424	0.0930426	Yes	Q4	0.547516	0.299374	HY	1	0	0	47	1054	0	NA	NA	1030	0	NA	NA	NA	NA	NA	1	2	0	0	0	1	1	1	0	1	0	0	0	0	0	0	0	0	0	0	0	0	0	0	0	0
SL258043	Newly Diagnosed Multiple Myeloma	0.0931267	-0.0692772	Yes	Q3	0.479116	0.140769	LB	1	0	0	62	1078	0	NA	NA	1028	0	NA	NA	NA	NA	NA	NA	NA	0	0	0	0	0	0	0	0	0	0	0	0	0	0	0	0	0	0	0	0	0	0	0	0
SL258044	Late Relapse Multiple Myeloma	0.215867	0.214648	Yes	Q4	0.927536	0.293622	LB	1	0	0	78	481	1	NA	NA	NA	NA	NA	NA	NA	NA	NA	2	2	0	0	0	0	1	0	1	0	0	0	0	0	0	1	0	0	0	0	0	0	0	0	0	0
SL258045	Early Relapse Multiple Myeloma	-0.0061754	0.257047	No	Q1	0.356324	0.742511	MF	0	0	0	61	819	1	NA	NA	NA	NA	NA	NA	NA	NA	NA	3	3	1	0	0	0	0	0	0	0	0	0	0	1	0	0	0	0	0	0	0	1	0	0	0	0
SL258046	Smoldering Multiple Myeloma	-0.332701	0.130408	No	Q1	0.182755	0.403288	CD2	0	1	0	59	621	0	965	0	NA	NA	0	0	0	2	1	NA	NA	1	0	0	0	1	0	1	0	0	0	0	0	0	0	0	0	0	0	0	0	0	0	0	0
SL258047	Late Relapse Multiple Myeloma	-0.0386706	0.493275	No	Q1	0.370966	0.877036	PR	0	0	0	62	44	1	NA	NA	NA	NA	NA	NA	NA	NA	NA	1	2	0	0	0	0	0	1	1	1	0	0	0	0	0	0	0	0	0	0	0	0	0	0	0	0
SL258048	Newly Diagnosed Multiple Myeloma	-0.283771	0.448086	No	Q1	0.375629	1.05586	MF	1	0	0	65	936	0	NA	NA	1118	0	NA	NA	NA	NA	NA	2	2	0	0	0	0	0	0	0	0	0	0	0	0	0	0	0	0	0	0	0	0	0	0	0	0
SL258049	Late Relapse Multiple Myeloma	0.314828	-0.0369995	Yes	Q3	0.803105	-0.224319	PR	1	0	0	55	90	1	NA	NA	NA	NA	NA	NA	NA	NA	NA	2	2	1	0	0	0	1	0	1	0	0	0	0	0	0	0	0	0	0	0	0	0	0	0	0	0
SL264890	Newly Diagnosed Multiple Myeloma	0.462101	0.0925301	Yes	Q4	0.9285	-0.192509	PR	0	0	0	63	440	1	NA	NA	439	1	NA	NA	NA	NA	NA	3	3	0	1	0	0	1	0	1	1	0	0	0	0	0	0	0	0	0	0	0	0	0	0	0	0
SL264891	Late Relapse Multiple Myeloma	0.325005	0.0140206	Yes	Q4	0.507036	-0.480797	PR	1	1	0	49	1071	0	NA	NA	NA	NA	NA	NA	NA	NA	NA	1	2	0	0	0	0	1	0	1	0	0	0	0	0	0	0	0	0	0	0	0	0	0	0	0	0
SL264892	Smoldering Multiple Myeloma	0.111094	0.288406	Yes	Q4	0.789994	1.33043	PR	1	0	0	68	932	0	2121	0	NA	NA	0	0	1	2	2	NA	NA	1	0	0	0	1	0	0	0	0	0	0	0	0	0	0	0	0	0	0	0	0	0	0	0
SL264893	Early Relapse Multiple Myeloma	-0.103845	0.320533	No	Q1	0.654555	0.763935	MF	1	0	0	70	469	1	NA	NA	NA	NA	NA	NA	NA	NA	NA	1	2	1	0	0	0	1	0	0	0	0	0	0	0	0	0	0	0	0	1	0	0	0	0	0	0
SL264913	Late Relapse Multiple Myeloma	-0.147828	0.299695	No	Q1	-0.640847	0.165826	MF	0	0	0	79	1069	0	NA	NA	NA	NA	NA	NA	NA	NA	NA	NA	NA	NA	NA	NA	NA	NA	NA	NA	NA	NA	0	0	0	0	0	0	0	0	0	0	0	0	0	0	0
SL264914	Early Relapse Multiple Myeloma	-0.40025	0.0413661	No	Q1	-0.0940554	0.730352	MF	1	1	0	65	609	1	NA	NA	NA	NA	NA	NA	NA	NA	NA	NA	NA	NA	NA	NA	NA	NA	NA	NA	NA	NA	0	0	0	0	0	0	0	0	0	0	0	0	0	0	0
SL264915	Late Relapse Multiple Myeloma	-0.0211987	0.227422	No	Q1	0.708088	0.959855	MF	1	0	0	61	1084	1	NA	NA	NA	NA	NA	NA	NA	NA	NA	1	2	0	1	0	0	1	1	1	1	1	0	0	0	0	0	0	0	0	0	0	0	0	0	0	0
SL264916	Late Relapse Multiple Myeloma	-0.0111342	-0.0213914	No	Q2	0.353055	0.289759	CD2	0	0	0	67	1069	0	NA	NA	NA	NA	NA	NA	NA	NA	NA	NA	NA	1	0	0	0	0	0	0	0	0	0	0	0	1	0	0	0	0	0	0	0	0	0	0	0
SL264917	Smoldering Multiple Myeloma	-0.126432	0.0423253	No	Q1	0.0620898	0.0547163	LB	1	0	1	58	860	0	2135	0	NA	NA	0	0	0	1	1	NA	NA	0	0	0	0	0	0	0	0	0	0	0	0	0	0	0	0	0	0	0	0	0	0	1	0
SL264936	MGUS	-0.216962	0.163007	No	Q1	0.164983	0.352373	LB	1	0	0	55	90	0	NA	NA	NA	NA	NA	NA	NA	NA	NA	NA	NA	0	0	0	0	0	0	0	0	0	0	0	0	0	0	0	0	0	0	0	0	0	0	0	0
SL264937	Newly Diagnosed Multiple Myeloma	-0.138519	0.0501695	No	Q1	-0.0105608	0.085296	MF	0	0	0	60	650	0	NA	NA	1153	1	NA	NA	NA	NA	NA	1	1	0	0	0	0	1	0	0	0	0	0	0	0	0	1	0	0	0	1	0	0	0	0	0	0
SL264938	Early Relapse Multiple Myeloma	-0.0264038	0.120615	No	Q1	0.0601653	-0.185729	HY	1	0	0	80	436	1	NA	NA	NA	NA	NA	NA	NA	NA	NA	1	1	0	0	0	0	0	0	0	0	0	0	0	0	0	0	0	0	0	0	0	0	0	0	0	0
SL264939	Newly Diagnosed Multiple Myeloma	0.037442	-0.0563073	Yes	Q3	0.0879371	-0.327659	MS	0	0	1	53	958	0	NA	NA	938	0	NA	NA	NA	NA	NA	1	2	0	0	1	0	1	0	1	1	0	0	0	1	0	0	0	0	0	0	0	0	0	0	0	0
SL264940	Newly Diagnosed Multiple Myeloma	-0.225668	0.291784	No	Q1	0.187422	0.457262	HY	1	0	0	72	101	1	NA	NA	82	1	NA	NA	NA	NA	NA	3	2	0	0	0	0	0	0	0	0	0	0	0	0	0	0	0	0	0	0	0	0	0	0	0	0
SL264941	Newly Diagnosed Multiple Myeloma	0.313221	0.114163	Yes	Q4	0.688486	0.129062	HY	0	0	0	57	1047	0	NA	NA	1036	0	NA	NA	NA	NA	NA	2	2	0	0	0	0	0	0	0	0	0	0	0	0	0	0	0	0	0	0	0	0	0	0	0	0
SL264942	Early Relapse Multiple Myeloma	-0.0330561	0.259264	No	Q1	0.391583	0.395685	HY	0	0	0	75	354	1	NA	NA	NA	NA	NA	NA	NA	NA	NA	1	2	0	0	0	0	0	1	0	1	0	0	0	0	0	0	0	0	0	0	0	0	0	0	0	0
SL264943	Early Relapse Multiple Myeloma	0.186235	0.0769417	Yes	Q4	0.386835	-0.0794189	CD1	1	0	0	64	1049	0	NA	NA	NA	NA	NA	NA	NA	NA	NA	1	NA	1	0	0	0	1	1	0	1	0	0	0	0	0	0	0	0	0	1	0	1	0	0	0	0
SL264944	MGUS	-0.195423	0.302581	No	Q1	0.0928791	0.771361	MF	0	0	0	71	753	0	NA	NA	NA	NA	NA	NA	NA	NA	NA	NA	NA	0	0	0	0	0	0	0	0	0	0	0	0	0	0	0	0	0	0	0	0	0	0	0	0
SL264945	Early Relapse Multiple Myeloma	0.152867	0.0541561	Yes	Q4	0.530535	-0.0920916	LB	0	0	0	50	1076	0	NA	NA	NA	NA	NA	NA	NA	NA	NA	NA	NA	0	0	0	0	0	0	1	0	0	0	0	0	0	0	0	0	0	0	0	0	0	0	0	0
SL264946	Newly Diagnosed Multiple Myeloma	0.399876	0.230327	Yes	Q4	0.526824	-0.527449	PR	1	0	0	73	343	1	NA	NA	302	1	NA	NA	NA	NA	NA	2	2	0	0	0	0	1	1	0	1	0	0	0	0	0	0	0	0	0	0	0	0	0	0	0	0
SL264947	Newly Diagnosed Multiple Myeloma	0.164415	0.0849407	Yes	Q4	0.178504	-0.650748	HY	0	1	0	61	1004	0	NA	NA	1005	0	NA	NA	NA	NA	NA	2	2	0	0	0	0	1	0	0	0	0	0	0	0	0	0	0	0	0	0	0	0	0	0	0	1
SL264948	Early Relapse Multiple Myeloma	0.139755	0.269513	Yes	Q4	0.766342	0.481564	LB	1	0	0	66	1078	0	NA	NA	NA	NA	NA	NA	NA	NA	NA	1	1	0	0	0	0	1	0	1	0	0	0	0	0	0	0	0	0	0	0	0	0	0	0	0	0
SL264957	Late Relapse Multiple Myeloma	-0.0509564	0.21406	No	Q1	0.500757	0.622861	PR	1	0	1	62	306	1	NA	NA	NA	NA	NA	NA	NA	NA	NA	NA	NA	0	0	0	0	1	0	0	0	0	0	0	0	1	0	0	0	0	0	0	0	0	0	0	0
SL264958	MGUS	-0.182032	0.153959	No	Q1	0.11053	0.523356	MF	1	0	0	76	622	0	NA	NA	NA	NA	NA	NA	NA	NA	NA	NA	NA	0	0	0	0	0	0	0	0	0	0	0	0	0	0	0	0	0	0	0	0	0	0	0	0
SL264959	Early Relapse Multiple Myeloma	0.180963	0.204063	Yes	Q4	0.258132	0.285002	PR	1	1	0	53	1004	1	NA	NA	NA	NA	NA	NA	NA	NA	NA	NA	NA	0	0	0	0	0	0	0	0	0	0	0	0	0	0	0	0	0	0	0	0	0	0	0	0
SL264960	Newly Diagnosed Multiple Myeloma	0.271052	0.00582293	Yes	Q4	0.643301	-0.228418	HY	1	0	0	47	848	0	NA	NA	1130	1	NA	NA	NA	NA	NA	1	1	0	0	0	0	0	0	0	0	0	0	0	0	0	0	0	0	0	0	0	0	0	0	0	0
SL264961	Newly Diagnosed Multiple Myeloma	0.284571	0.219089	Yes	Q4	0.761103	-0.208264	LB	0	0	0	73	1047	0	NA	NA	1076	1	NA	NA	NA	NA	NA	3	2	0	0	0	0	0	0	1	0	0	0	0	0	0	0	0	0	0	0	0	0	0	0	0	0
SL264962	Newly Diagnosed Multiple Myeloma	-0.144207	-0.0400363	No	Q2	0.254294	0.298325	CD2	0	0	0	70	1097	0	NA	NA	1078	0	NA	NA	NA	NA	NA	1	2	1	0	0	0	1	0	0	0	0	0	0	0	0	0	0	0	0	0	0	0	0	0	0	0
SL264963	Early Relapse Multiple Myeloma	0.281144	0.274652	Yes	Q4	0.964735	0.467273	PR	1	0	0	61	596	1	NA	NA	NA	NA	NA	NA	NA	NA	NA	NA	NA	1	0	0	0	0	0	0	0	0	1	0	0	0	1	0	0	0	0	0	1	0	0	0	0
SL264964	Newly Diagnosed Multiple Myeloma	0.101214	0.0390101	Yes	Q4	0.107833	-0.569997	HY	0	1	0	79	1074	0	NA	NA	1057	0	NA	NA	NA	NA	NA	1	1	0	0	0	0	0	0	0	0	0	0	0	0	0	0	0	0	0	0	0	0	0	0	0	0
SL264965	Early Relapse Multiple Myeloma	0.150832	0.0988331	Yes	Q4	0.432713	-0.18128	LB	0	0	0	60	780	1	NA	NA	NA	NA	NA	NA	NA	NA	NA	1	1	0	0	0	0	1	0	1	0	0	0	0	1	0	0	0	0	0	0	0	0	0	0	0	0
SL264966	Early Relapse Multiple Myeloma	-0.0251951	-0.00713522	No	Q2	0.173034	-0.0792371	LB	0	0	0	61	923	0	NA	NA	NA	NA	NA	NA	NA	NA	NA	NA	NA	0	0	0	0	0	0	1	0	0	0	1	0	0	1	0	0	0	0	0	0	0	0	0	0
SL264967	Newly Diagnosed Multiple Myeloma	0.242543	0.281519	Yes	Q4	0.578812	0.608799	PR	0	0	0	62	1077	0	NA	NA	1064	0	NA	NA	NA	NA	NA	1	1	0	0	0	0	0	0	0	0	0	0	1	0	0	0	0	0	0	0	0	0	0	0	0	0
SL264968	Smoldering Multiple Myeloma	0.42408	0.0948084	Yes	Q4	0.560534	-0.521973	LB	1	0	0	76	593	0	160	0	NA	NA	1	1	0	2	3	NA	NA	0	0	0	0	1	0	1	0	0	0	0	0	0	0	0	0	0	0	0	0	0	0	0	0
SL264969	Newly Diagnosed Multiple Myeloma	0.164521	0.120569	Yes	Q4	0.809293	0.138465	LB	0	0	0	63	991	0	NA	NA	986	0	NA	NA	NA	NA	NA	1	2	0	0	0	0	0	0	0	0	0	0	0	0	0	0	0	0	0	0	0	0	0	0	0	0
SL271831	Newly Diagnosed Multiple Myeloma	0.00078462	-0.0893314	Yes	Q3	0.19022	0.0554779	CD1	1	0	0	37	1043	0	NA	NA	978	0	NA	NA	NA	NA	NA	1	1	1	0	0	0	0	0	0	0	0	0	0	0	0	1	0	0	0	1	0	0	0	0	0	0
SL271832	Early Relapse Multiple Myeloma	-0.267965	0.151916	No	Q1	-0.280733	0.468363	MF	1	1	0	49	1033	0	NA	NA	NA	NA	NA	NA	NA	NA	NA	1	2	0	0	0	0	0	0	0	0	0	0	0	0	0	0	0	0	0	0	0	0	0	0	0	0
SL271838	Late Relapse Multiple Myeloma	0.399183	0.165052	Yes	Q4	0.933461	0.0898429	PR	0	0	0	57	17	1	NA	NA	NA	NA	NA	NA	NA	NA	NA	NA	NA	0	0	1	0	0	0	1	1	0	0	0	0	0	0	0	0	0	0	0	0	0	0	0	0
SL271839	Early Relapse Multiple Myeloma	0.120626	-0.0184296	Yes	Q3	0.396666	0.0800594	MF	0	0	0	69	651	1	NA	NA	NA	NA	NA	NA	NA	NA	NA	2	2	1	0	0	0	0	0	0	0	0	0	0	0	0	1	0	0	0	0	0	0	0	0	0	0
SL271840	Newly Diagnosed Multiple Myeloma	0.0682848	0.131197	Yes	Q4	0.205845	-0.0400562	HY	1	0	0	76	0	0	NA	NA	26	0	NA	NA	NA	NA	NA	3	2	0	0	0	0	0	0	0	0	0	0	0	0	0	0	0	0	0	0	0	0	0	0	0	0
SL271841	Early Relapse Multiple Myeloma	-0.181511	0.302825	No	Q1	0.573263	1.22735	MF	0	0	0	55	916	0	NA	NA	NA	NA	NA	NA	NA	NA	NA	1	2	0	0	0	0	0	0	0	0	0	0	0	0	0	0	0	0	0	0	0	0	0	0	0	0
SL271845	Late Relapse Multiple Myeloma	0.0312399	0.242285	Yes	Q4	0.400894	0.440288	CD1	1	0	0	55	1041	0	NA	NA	NA	NA	NA	NA	NA	NA	NA	NA	NA	0	0	0	0	0	0	0	0	0	1	0	0	0	0	1	0	0	0	0	0	0	0	0	0
SL271846	Smoldering Multiple Myeloma	0.204611	0.155801	Yes	Q4	0.604716	0.126654	LB	1	0	0	77	573	0	573	0	NA	NA	0	0	1	2	2	NA	NA	0	0	0	0	1	1	1	1	0	0	0	0	0	0	0	0	0	1	0	0	0	0	0	0
SL271847	Late Relapse Multiple Myeloma	0.364656	0.0693534	Yes	Q4	0.735662	-0.162658	PR	0	NA	1	53	52	1	NA	NA	NA	NA	NA	NA	NA	NA	NA	NA	NA	0	0	0	0	1	0	1	0	0	0	0	0	0	0	0	0	0	0	0	0	0	0	0	0
SL271848	Newly Diagnosed Multiple Myeloma	0.431778	-0.0707902	Yes	Q3	0.565427	-0.864668	HY	1	0	0	43	1014	0	NA	NA	1002	0	NA	NA	NA	NA	NA	2	2	0	0	0	0	0	0	0	0	0	0	0	0	0	0	0	0	0	0	0	0	0	0	0	0
SL271849	Smoldering Multiple Myeloma	0.0461866	-0.096146	Yes	Q3	0.120669	-0.261826	CD2	1	0	0	77	1016	0	951	1	NA	NA	0	1	0	1	2	NA	NA	1	0	0	0	1	0	0	0	0	0	0	0	0	0	0	0	0	0	0	0	0	0	0	0
SL271879	Newly Diagnosed Multiple Myeloma	-0.205654	0.375396	No	Q1	0.0649598	0.780945	MF	0	0	0	56	978	0	NA	NA	230	1	NA	NA	NA	NA	NA	1	1	0	0	0	0	0	0	0	0	0	0	0	0	0	0	0	0	0	0	0	0	0	0	0	0
SL271880	Early Relapse Multiple Myeloma	0.311574	-0.0202826	Yes	Q3	0.520767	-0.429175	LB	1	0	1	53	971	0	NA	NA	NA	NA	NA	NA	NA	NA	NA	1	2	0	0	0	0	0	0	1	0	0	0	0	0	0	0	0	1	0	1	0	0	0	0	0	0
SL271886	Late Relapse Multiple Myeloma	0.349095	0.0948332	Yes	Q4	0.702538	-0.367919	LB	0	1	0	64	106	1	NA	NA	NA	NA	NA	NA	NA	NA	NA	1	2	0	0	0	1	0	0	1	0	0	0	0	0	0	0	0	0	0	0	0	0	0	0	0	0
SL271902	Newly Diagnosed Multiple Myeloma	-0.0224532	-0.0526594	No	Q2	0.28678	0.280264	CD2	1	0	0	65	746	0	NA	NA	708	1	NA	NA	NA	NA	NA	1	1	1	0	0	0	1	0	1	1	0	0	0	0	0	0	0	0	0	0	0	0	0	0	0	0
SL271908	Early Relapse Multiple Myeloma	-0.246362	0.267653	No	Q1	0.513908	1.16017	MF	1	0	0	62	852	0	NA	NA	NA	NA	NA	NA	NA	NA	NA	1	NA	0	0	0	0	0	0	0	0	0	0	0	0	0	0	0	0	0	0	0	0	0	0	0	0
SL271915	Newly Diagnosed Multiple Myeloma	0.0254269	0.0301637	Yes	Q4	0.1539	-0.405146	HY	0	0	0	45	909	0	NA	NA	904	0	NA	NA	NA	NA	NA	1	1	0	0	0	0	1	0	0	0	0	0	0	0	0	0	0	0	0	0	0	0	0	0	0	0
SL271916	Newly Diagnosed Multiple Myeloma	0.269217	-0.0146778	Yes	Q3	0.396192	-0.400441	HY	0	0	0	54	1006	0	NA	NA	1134	1	NA	NA	NA	NA	NA	3	2	0	0	0	0	0	0	0	0	0	0	0	0	0	0	0	0	0	0	0	0	0	0	0	0
SL271926	Late Relapse Multiple Myeloma	0.194285	-0.00282496	Yes	Q3	0.504111	-0.38943	HY	1	1	0	57	930	0	NA	NA	NA	NA	NA	NA	NA	NA	NA	NA	NA	0	0	0	0	0	0	0	0	0	0	0	0	0	0	0	0	0	0	0	0	0	0	0	0
SL271938	Newly Diagnosed Multiple Myeloma	-0.0461324	0.303385	No	Q1	0.440512	0.489421	HY	1	0	0	47	994	0	NA	NA	1030	0	NA	NA	NA	NA	NA	3	3	0	0	0	1	1	1	0	1	0	0	0	0	0	0	0	0	0	0	0	0	0	0	0	0
SL278520	Early Relapse Multiple Myeloma	0.0606314	-0.0402836	Yes	Q3	-0.133826	-0.357144	PR	1	0	0	53	963	0	NA	NA	NA	NA	NA	NA	NA	NA	NA	3	2	0	0	0	0	0	0	1	0	0	0	0	0	0	0	1	0	0	1	0	0	0	1	0	0
SL278537	Newly Diagnosed Multiple Myeloma	-0.212384	0.255887	No	Q1	0.118412	0.323513	MF	1	0	0	39	1009	0	NA	NA	989	0	NA	NA	NA	NA	NA	1	2	0	0	0	1	0	1	0	0	0	0	0	0	0	0	0	0	0	0	0	0	0	0	0	0
SL278555	Late Relapse Multiple Myeloma	0.355872	0.0486444	Yes	Q4	0.865269	-0.258698	CD2	1	1	0	65	997	0	NA	NA	NA	NA	NA	NA	NA	NA	NA	NA	NA	1	0	0	0	1	1	1	1	0	0	0	0	0	0	0	0	0	0	0	0	0	0	0	0
SL310702	MGUS	-0.220872	0.0301957	No	Q1	0.132263	0.322799	CD2	0	0	0	55	423	0	NA	NA	NA	NA	NA	NA	NA	NA	NA	NA	NA	1	0	0	0	0	0	0	0	0	0	0	0	0	0	0	0	0	0	0	0	0	0	0	0
SL310703	Early Relapse Multiple Myeloma	-0.121274	0.261443	No	Q1	0.189039	0.503137	MF	0	0	0	71	396	1	NA	NA	NA	NA	NA	NA	NA	NA	NA	2	2	0	0	0	0	0	0	0	0	0	0	0	0	0	0	0	0	0	0	0	0	0	0	0	0
SL310717	Newly Diagnosed Multiple Myeloma	-0.0547567	-0.0597615	No	Q2	0.196174	-0.139323	HY	0	0	0	54	931	0	NA	NA	916	0	NA	NA	NA	NA	NA	1	1	0	0	0	0	0	0	0	0	0	0	0	0	0	0	0	0	0	0	0	0	0	0	0	0
SL310718	Late Relapse Multiple Myeloma	0.213826	0.116514	Yes	Q4	0.679667	0.188299	PR	0	0	0	79	22	1	NA	NA	NA	NA	NA	NA	NA	NA	NA	2	2	1	0	0	0	0	1	0	1	0	0	0	0	0	0	0	0	0	0	0	0	0	0	0	0
SL310721	Newly Diagnosed Multiple Myeloma	-0.280482	0.377391	No	Q1	0.0681926	0.731393	MF	0	0	0	63	575	0	NA	NA	736	0	NA	NA	NA	NA	NA	NA	NA	0	0	0	0	0	0	0	0	0	0	0	0	0	0	0	0	0	0	0	0	0	0	0	0
SL310722	MGUS	-0.335548	0.162327	No	Q1	0.108587	0.767249	MF	1	0	0	57	916	0	NA	NA	NA	NA	NA	NA	NA	NA	NA	NA	NA	0	0	0	0	0	0	0	0	0	0	0	0	0	0	0	0	0	0	0	0	0	0	0	0
SL310723	Newly Diagnosed Multiple Myeloma	0.0343005	0.10309	Yes	Q4	0.560366	0.213506	MF	0	1	0	85	913	0	NA	NA	577	1	NA	NA	NA	NA	NA	1	2	0	1	0	0	0	0	1	1	0	0	0	0	0	0	0	0	0	0	0	0	0	0	0	0
SL310733	Late Relapse Multiple Myeloma	0.146415	0.119135	Yes	Q4	0.780312	0.260823	LB	1	0	0	71	940	0	NA	NA	NA	NA	NA	NA	NA	NA	NA	NA	NA	0	0	0	0	0	0	1	0	0	0	0	0	0	0	1	1	1	1	0	0	0	0	0	0
SL310739	Early Relapse Multiple Myeloma	0.338943	0.0930057	Yes	Q4	0.735573	-0.285597	HY	1	0	0	65	931	0	NA	NA	NA	NA	NA	NA	NA	NA	NA	1	2	0	0	0	0	0	0	0	0	0	0	0	0	0	0	0	0	0	0	0	0	0	0	0	0
SL310740	Early Relapse Multiple Myeloma	0.349479	0.0896331	Yes	Q4	0.65423	-0.581557	HY	1	NA	0	45	734	0	NA	NA	NA	NA	NA	NA	NA	NA	NA	1	2	0	0	0	0	1	0	0	0	0	0	0	0	0	0	0	0	0	0	0	0	0	0	0	0
SL316610	Early Relapse Multiple Myeloma	-0.0522698	0.214253	No	Q1	0.512811	0.816031	PR	1	0	NA	68	902	0	NA	NA	NA	NA	NA	NA	NA	NA	NA	2	2	0	0	0	0	0	0	0	0	0	0	0	0	0	0	0	0	0	0	0	0	0	0	0	0
SL316611	Late Relapse Multiple Myeloma	-0.268447	0.239695	No	Q1	0.210565	0.597752	MF	1	0	0	71	32	1	NA	NA	NA	NA	NA	NA	NA	NA	NA	2	2	0	1	0	0	1	0	1	1	0	0	0	0	0	0	0	0	0	0	0	0	0	0	0	0
SL316615	Newly Diagnosed Multiple Myeloma	0.0424647	-0.217354	Yes	Q3	0.28372	-0.180866	HY	1	1	0	88	427	0	NA	NA	NA	NA	1	1	0	2	3	NA	NA	0	0	0	0	0	0	0	0	0	0	0	0	0	0	0	0	0	1	0	0	1	0	0	0
SL316631	Early Relapse Multiple Myeloma	0.154598	0.121279	Yes	Q4	0.606345	-0.0465083	HY	1	0	0	73	427	0	NA	NA	NA	NA	NA	NA	NA	NA	NA	1	2	0	0	0	0	0	1	1	1	0	0	0	0	0	0	0	0	0	0	0	0	0	0	0	0
SL316643	Late Relapse Multiple Myeloma	0.223827	0.214324	Yes	Q4	0.904579	0.336167	PR	1	0	0	69	629	1	NA	NA	NA	NA	NA	NA	NA	NA	NA	1	NA	0	0	0	0	0	0	0	0	0	0	0	0	0	0	0	0	0	0	0	0	0	0	0	0
SL316647	Late Relapse Multiple Myeloma	0.3226	0.104519	Yes	Q4	0.93516	-0.278629	LB	1	0	0	59	555	1	NA	NA	NA	NA	NA	NA	NA	NA	NA	1	1	0	0	0	0	1	0	1	0	0	0	0	1	0	0	0	0	0	0	0	0	0	0	0	0
SL316648	Late Relapse Multiple Myeloma	0.286743	-0.00206156	Yes	Q3	0.653169	-0.120611	PR	1	0	0	71	149	1	NA	NA	NA	NA	NA	NA	NA	NA	NA	NA	NA	1	0	0	0	1	0	1	0	0	0	0	0	0	0	0	0	1	1	0	0	0	0	0	0
SL316663	Late Relapse Multiple Myeloma	0.425458	0.0788492	Yes	Q4	1.15197	0.0122196	PR	1	0	0	83	77	1	NA	NA	NA	NA	NA	NA	NA	NA	NA	2	2	0	0	0	0	1	0	1	0	0	0	0	0	0	0	0	1	0	1	0	0	0	0	0	0
SL316664	Late Relapse Multiple Myeloma	0.093012	-0.022192	Yes	Q3	0.587573	-0.0541003	LB	1	0	0	65	874	0	NA	NA	NA	NA	NA	NA	NA	NA	NA	NA	NA	0	0	0	1	1	0	1	0	0	0	0	0	0	1	0	0	0	1	0	0	0	0	0	0
SL316665	Late Relapse Multiple Myeloma	0.282429	0.137106	Yes	Q4	0.688862	0.114193	PR	1	0	0	73	559	1	NA	NA	NA	NA	NA	NA	NA	NA	NA	2	2	0	0	0	0	0	0	1	0	0	0	0	0	0	0	0	0	0	0	0	0	0	0	0	0
SL316666	Late Relapse Multiple Myeloma	0.127175	-6.02169e-05	Yes	Q3	0.681194	0.360613	LB	1	1	0	65	744	1	NA	NA	NA	NA	NA	NA	NA	NA	NA	1	1	0	0	0	0	1	0	1	0	0	0	0	0	0	0	0	0	0	0	0	0	0	0	0	0
SL316679	Late Relapse Multiple Myeloma	-0.14737	0.365723	No	Q1	0.657296	1.54927	PR	1	0	0	65	894	0	NA	NA	NA	NA	NA	NA	NA	NA	NA	2	2	0	0	0	0	0	0	0	0	0	0	0	0	0	0	0	0	0	0	0	0	0	0	0	0
SL316711	Early Relapse Multiple Myeloma	-0.306437	0.315659	No	Q1	0.108057	0.845767	MF	1	1	0	75	123	1	NA	NA	NA	NA	NA	NA	NA	NA	NA	NA	NA	NA	NA	NA	NA	NA	NA	NA	NA	NA	0	0	0	0	0	0	0	0	0	0	0	0	0	0	0
SL316727	Late Relapse Multiple Myeloma	-0.21895	0.308099	No	Q1	0.371164	0.602122	MF	0	0	0	65	12	1	NA	NA	NA	NA	NA	NA	NA	NA	NA	3	2	0	0	0	0	0	0	0	0	0	0	0	0	0	0	0	0	0	0	0	0	0	0	0	0
SL322886	MGUS	-0.418301	0.046515	No	Q1	0.0434113	0.506517	CD2	0	0	0	83	757	0	NA	NA	NA	NA	NA	NA	NA	NA	NA	NA	NA	0	0	0	0	0	0	0	0	0	0	0	0	0	0	0	0	0	0	0	0	0	0	0	0
SL322900	Smoldering Multiple Myeloma	-0.286736	-0.12277	No	Q2	-0.137425	-0.094865	CD2	0	0	1	39	742	0	1096	1	NA	NA	1	1	0	3	3	NA	NA	1	0	0	0	0	0	0	0	0	0	0	0	0	0	0	0	0	0	0	0	0	0	0	0
SL322901	MGUS	-0.187388	-0.0155129	No	Q2	-0.215741	-0.251621	LB	1	1	0	62	0	0	NA	NA	NA	NA	NA	NA	NA	NA	NA	NA	NA	0	0	0	0	0	0	0	0	0	0	0	0	0	0	0	0	0	0	0	0	0	0	0	0
SL322902	Late Relapse Multiple Myeloma	0.0174914	0.229382	Yes	Q4	0.480436	0.521132	CD1	0	0	0	64	161	1	NA	NA	NA	NA	NA	NA	NA	NA	NA	NA	NA	1	0	0	0	0	1	1	1	1	0	0	0	0	0	0	0	0	0	0	0	0	0	0	0
SL322903	Newly Diagnosed Multiple Myeloma	0.164426	0.00643016	Yes	Q4	0.609167	0.405247	CD1	1	0	0	85	69	1	NA	NA	54	1	NA	NA	NA	NA	NA	3	2	1	0	0	0	0	0	1	1	0	0	0	0	0	0	0	0	0	0	0	0	0	0	1	0
SL322904	Late Relapse Multiple Myeloma	-0.169785	0.143098	No	Q1	0.328843	0.520919	MS	0	0	0	67	834	1	NA	NA	NA	NA	NA	NA	NA	NA	NA	NA	NA	0	0	0	0	0	0	0	0	0	0	0	0	0	0	0	0	0	0	0	0	0	0	0	0
SL322916	Early Relapse Multiple Myeloma	0.24182	0.0313854	Yes	Q4	0.702511	-0.0597765	HY	0	0	0	57	810	0	NA	NA	NA	NA	NA	NA	NA	NA	NA	3	2	0	0	0	0	0	0	0	0	0	0	0	0	0	0	0	0	0	0	0	0	0	0	0	0
SL322917	Late Relapse Multiple Myeloma	0.482387	0.0537809	Yes	Q4	0.882375	-0.171072	PR	0	0	0	59	48	1	NA	NA	NA	NA	NA	NA	NA	NA	NA	3	NA	0	0	0	0	1	1	1	1	1	0	0	0	0	0	0	0	0	0	0	0	0	0	0	1
SL322929	Newly Diagnosed Multiple Myeloma	0.105938	0.117473	Yes	Q4	0.435919	-0.164266	HY	0	0	0	71	857	1	NA	NA	135	1	NA	NA	NA	NA	NA	2	NA	0	0	0	0	0	0	1	0	0	0	0	0	0	0	0	0	0	0	0	0	0	0	0	0
SL322930	Early Relapse Multiple Myeloma	0.156225	-0.0151173	Yes	Q3	0.594132	0.30199	CD1	1	0	0	59	730	0	NA	NA	NA	NA	NA	NA	NA	NA	NA	NA	NA	1	0	0	0	0	0	0	0	0	0	0	0	0	0	0	0	0	0	0	0	0	0	0	0
SL340698	Newly Diagnosed Multiple Myeloma	0.00820146	-0.0723336	Yes	Q3	0.352015	0.0834543	CD1	1	0	0	79	820	0	NA	NA	799	0	NA	NA	NA	NA	NA	NA	NA	1	0	0	0	1	0	0	0	0	0	0	0	0	1	0	0	0	0	0	0	0	0	0	0
SL340699	Smoldering Multiple Myeloma	-0.482581	0.185861	No	Q1	-0.0248049	0.744729	MF	0	0	0	71	751	0	125	1	NA	NA	1	0	0	1	2	NA	NA	0	0	0	0	0	0	0	0	0	0	0	0	0	0	0	0	0	0	0	0	0	0	0	0
SL340700	Newly Diagnosed Multiple Myeloma	0.30467	0.0320682	Yes	Q4	0.421742	-0.247996	HY	1	0	0	60	436	1	NA	NA	322	1	NA	NA	NA	NA	NA	3	3	0	0	0	0	1	1	0	0	0	0	0	0	0	0	0	0	0	0	0	0	0	0	0	0
SL340701	Newly Diagnosed Multiple Myeloma	-0.430273	0.226634	No	Q1	0.123645	0.743215	CD2	0	0	0	70	342	0	NA	NA	239	0	NA	NA	NA	NA	NA	1	2	0	0	0	0	0	0	0	0	0	0	0	0	0	0	0	0	0	0	0	1	0	0	0	0
SL340722	Late Relapse Multiple Myeloma	0.287416	0.086283	Yes	Q4	0.672472	-0.17907	PR	0	0	0	62	542	0	NA	NA	NA	NA	NA	NA	NA	NA	NA	3	2	0	0	0	0	1	0	1	0	0	0	0	0	0	0	0	0	0	0	0	0	0	0	0	0
SL340723	Early Relapse Multiple Myeloma	-0.293697	0.238625	No	Q1	0.209979	0.582699	HY	1	0	0	47	790	0	NA	NA	NA	NA	NA	NA	NA	NA	NA	NA	NA	0	0	0	0	0	0	0	0	0	0	0	0	0	0	0	0	0	0	0	0	0	0	0	0
SL340724	Early Relapse Multiple Myeloma	0.257101	0.172587	Yes	Q4	0.732146	-0.0223803	PR	1	0	0	71	155	1	NA	NA	NA	NA	NA	NA	NA	NA	NA	NA	NA	0	0	0	0	1	0	0	0	0	0	0	0	0	0	0	0	0	0	0	0	0	0	0	0
SL340725	Newly Diagnosed Multiple Myeloma	-0.37063	0.175637	No	Q1	-0.121467	0.559304	MF	0	0	0	58	806	0	NA	NA	1094	0	NA	NA	NA	NA	NA	NA	NA	NA	NA	NA	NA	NA	NA	NA	NA	NA	0	0	0	0	0	0	0	0	0	0	0	0	0	0	0
SL340726	Newly Diagnosed Multiple Myeloma	0.0389475	-0.107342	Yes	Q3	0.31411	-0.0283502	HY	0	0	1	49	762	0	NA	NA	362	1	NA	NA	NA	NA	NA	1	1	0	0	0	0	0	0	0	0	0	0	0	0	0	0	0	0	0	0	0	0	0	0	0	0
SL340738	Newly Diagnosed Multiple Myeloma	0.145773	-0.040816	Yes	Q3	0.586287	-0.0527923	CD2	1	0	0	67	774	0	NA	NA	756	0	NA	NA	NA	NA	NA	1	1	1	0	0	0	0	0	0	0	0	0	0	0	0	0	0	0	0	0	0	1	0	0	0	0
SL340739	Early Relapse Multiple Myeloma	0.0572462	-0.0221452	Yes	Q3	0.352458	-0.0613813	HY	1	0	0	64	702	0	NA	NA	NA	NA	NA	NA	NA	NA	NA	NA	NA	0	0	0	0	0	0	0	0	0	0	0	0	0	0	0	0	0	0	0	0	0	0	0	0
SL340740	Newly Diagnosed Multiple Myeloma	0.121365	-0.000456892	Yes	Q3	0.159004	-0.172303	MS	0	0	0	63	1215	0	NA	NA	1212	0	NA	NA	NA	NA	NA	2	2	0	0	1	0	0	0	0	0	0	0	0	0	0	0	0	0	0	0	0	0	0	0	0	0
SL340746	Early Relapse Multiple Myeloma	0.242376	0.0981863	Yes	Q4	0.534963	0.246283	PR	1	0	0	73	74	1	NA	NA	NA	NA	NA	NA	NA	NA	NA	2	NA	0	0	0	0	0	0	1	1	0	0	0	0	0	0	0	0	0	0	0	0	0	0	0	0
SL340747	Early Relapse Multiple Myeloma	-0.12919	0.00867567	No	Q1	0.324608	0.356555	LB	0	0	0	60	522	1	NA	NA	NA	NA	NA	NA	NA	NA	NA	2	2	0	0	0	0	1	0	1	0	0	0	0	0	0	0	0	0	0	0	0	0	0	0	0	0
SL340761	Late Relapse Multiple Myeloma	0.178481	0.112448	Yes	Q4	0.879448	-0.130537	HY	1	0	0	55	196	1	NA	NA	NA	NA	NA	NA	NA	NA	NA	3	3	0	0	0	0	1	0	1	1	0	0	0	0	0	0	0	0	0	0	0	0	0	0	0	1
SL340762	Late Relapse Multiple Myeloma	-0.361529	0.158469	No	Q1	0.0132797	0.320092	MS	0	0	0	67	780	1	NA	NA	NA	NA	NA	NA	NA	NA	NA	NA	NA	0	0	1	0	1	1	0	1	0	0	0	0	0	0	0	0	0	0	0	0	0	0	0	0
SL340763	Late Relapse Multiple Myeloma	0.0461428	0.0524467	Yes	Q4	0.348644	-0.0522969	HY	1	0	0	77	228	1	NA	NA	NA	NA	NA	NA	NA	NA	NA	1	1	0	0	0	0	0	0	0	0	0	0	0	1	0	0	0	0	0	0	0	0	0	0	0	0
SL340765	Newly Diagnosed Multiple Myeloma	0.107938	0.160609	Yes	Q4	0.703648	0.372152	HY	1	0	0	48	772	0	NA	NA	592	1	NA	NA	NA	NA	NA	1	2	0	0	0	1	1	1	0	1	0	0	0	0	0	0	0	0	0	0	0	0	0	0	0	0
SL340789	Early Relapse Multiple Myeloma	0.331352	0.180481	Yes	Q4	0.82587	0.196744	MS	1	0	0	44	250	1	NA	NA	NA	NA	NA	NA	NA	NA	NA	3	3	0	0	1	0	1	0	1	1	0	0	0	0	0	0	0	0	0	0	0	0	0	0	0	0
SL340790	Late Relapse Multiple Myeloma	0.112626	0.144861	Yes	Q4	0.794631	0.345008	MS	1	0	0	56	78	1	NA	NA	NA	NA	NA	NA	NA	NA	NA	3	3	0	0	1	0	1	0	1	1	0	0	0	0	0	0	0	0	0	1	0	0	0	0	0	0
SL373319	MGUS	-0.237165	-0.0790535	No	Q2	-0.0878365	-0.000827918	LB	1	0	0	69	558	0	NA	NA	NA	NA	NA	NA	NA	NA	NA	NA	NA	0	0	0	0	0	0	0	0	0	0	0	0	0	0	0	0	0	0	0	0	0	0	0	0
SL373320	Early Relapse Multiple Myeloma	0.30991	0.0790878	Yes	Q4	0.434826	-0.412751	PR	1	0	0	76	296	1	NA	NA	NA	NA	NA	NA	NA	NA	NA	3	3	0	0	0	0	1	1	0	0	0	0	0	0	0	0	0	0	0	0	0	0	0	0	0	1
SL373321	Early Relapse Multiple Myeloma	0.189198	-0.017479	Yes	Q3	0.586522	-0.298292	HY	0	0	0	56	1082	0	NA	NA	NA	NA	NA	NA	NA	NA	NA	1	1	0	0	0	0	1	0	0	0	0	0	0	0	0	0	0	0	0	0	0	0	0	0	0	0
SL373322	MGUS	-0.37324	0.0170591	No	Q1	-0.39108	0.376526	MF	1	0	0	51	388	0	NA	NA	NA	NA	NA	NA	NA	NA	NA	NA	NA	1	0	0	0	0	0	0	0	0	0	0	0	0	0	0	0	0	0	0	0	0	0	1	0
SL373323	Newly Diagnosed Multiple Myeloma	-0.29458	-0.0672264	No	Q2	-0.343891	-0.0757158	LB	1	1	0	64	832	0	NA	NA	805	0	NA	NA	NA	NA	NA	1	1	0	0	0	0	0	0	0	0	0	0	0	0	0	0	0	0	0	0	0	0	0	0	0	0
SL373324	Early Relapse Multiple Myeloma	-0.0176684	-0.11647	No	Q2	-0.173179	-0.409801	HY	1	1	0	63	132	1	NA	NA	NA	NA	NA	NA	NA	NA	NA	2	2	0	0	0	0	0	0	1	0	0	0	0	0	0	0	0	0	0	0	0	0	0	0	0	0
SL373325	Newly Diagnosed Multiple Myeloma	0.00124521	-0.0413048	Yes	Q3	-0.334583	-0.582569	CD2	0	0	0	68	217	1	NA	NA	211	1	NA	NA	NA	NA	NA	1	1	1	0	0	0	0	0	0	0	0	0	0	0	0	0	0	0	0	0	1	0	0	0	0	0
SL373326	Early Relapse Multiple Myeloma	-0.234682	-0.106201	No	Q2	-0.708941	-0.557315	MS	0	0	0	54	505	1	NA	NA	NA	NA	NA	NA	NA	NA	NA	2	2	0	0	1	0	1	1	0	1	1	0	0	0	0	0	0	0	0	0	0	0	0	0	0	0
SL373327	Early Relapse Multiple Myeloma	-0.107148	0.0933873	No	Q1	-0.143846	-0.0859778	HY	0	0	0	53	1074	0	NA	NA	NA	NA	NA	NA	NA	NA	NA	1	NA	0	0	0	0	0	1	0	0	0	0	1	0	0	0	0	0	1	0	0	0	0	0	0	0
SL373328	Early Relapse Multiple Myeloma	-0.20089	0.0604483	No	Q1	-0.00397842	0.137461	MS	1	0	0	63	703	0	NA	NA	NA	NA	NA	NA	NA	NA	NA	1	1	0	0	0	0	1	0	0	0	0	0	0	0	0	0	0	0	0	0	0	0	0	0	0	0
SL373329	Early Relapse Multiple Myeloma	-0.0992927	-0.0376344	No	Q2	-0.287555	-0.254468	HY	1	1	0	63	132	1	NA	NA	NA	NA	NA	NA	NA	NA	NA	2	2	0	0	0	0	0	0	1	0	0	0	0	0	0	0	0	0	0	0	0	0	0	0	0	0
SL373330	Early Relapse Multiple Myeloma	-0.0993982	-0.0213261	No	Q2	-0.191299	-0.379808	CD2	0	0	0	61	33	1	NA	NA	NA	NA	NA	NA	NA	NA	NA	2	2	1	0	0	1	0	0	0	0	0	0	0	0	0	0	0	0	0	0	0	0	0	0	0	0
SL373331	Late Relapse Multiple Myeloma	-0.232053	0.370118	No	Q1	0.488986	1.15599	MF	1	0	0	54	642	0	NA	NA	NA	NA	NA	NA	NA	NA	NA	NA	NA	NA	NA	NA	NA	NA	NA	NA	NA	NA	0	0	0	0	0	0	0	0	0	0	0	0	0	0	0
SL373333	Newly Diagnosed Multiple Myeloma	0.0587101	-0.145633	Yes	Q3	-0.109331	-0.676909	LB	1	0	0	72	713	0	NA	NA	668	0	NA	NA	NA	NA	NA	1	2	0	0	0	0	0	0	1	0	0	0	0	0	0	0	0	0	0	0	0	0	0	0	0	0
SL373343	Newly Diagnosed Multiple Myeloma	-0.192474	-0.10812	No	Q2	-0.240088	-0.410996	HY	1	0	0	58	985	0	NA	NA	138	1	NA	NA	NA	NA	NA	2	2	0	0	0	0	0	0	0	0	0	0	0	0	0	0	0	0	0	0	0	0	0	0	0	0
SL373344	Early Relapse Multiple Myeloma	-0.347106	0.169827	No	Q1	-0.362216	0.16466	MF	0	0	0	69	1071	0	NA	NA	NA	NA	NA	NA	NA	NA	NA	NA	NA	0	0	0	0	0	0	0	0	0	0	0	0	0	1	0	0	0	0	0	0	0	0	0	0
SL373345	Early Relapse Multiple Myeloma	-0.119676	-0.0779683	No	Q2	-0.414334	-0.559792	MS	0	0	0	54	505	1	NA	NA	NA	NA	NA	NA	NA	NA	NA	2	2	0	0	1	0	1	1	0	1	1	0	0	0	0	0	0	0	0	0	0	0	0	0	0	0
SL373346	Early Relapse Multiple Myeloma	0.249698	0.0375526	Yes	Q4	0.338987	-0.3736	MS	0	0	1	58	118	1	NA	NA	NA	NA	NA	NA	NA	NA	NA	NA	NA	0	0	1	0	1	0	1	1	0	0	0	0	0	0	0	0	0	0	0	0	1	0	0	0
SL373347	Late Relapse Multiple Myeloma	0.255623	-0.0730353	Yes	Q3	0.538033	-0.233987	CD1	0	0	0	70	130	1	NA	NA	NA	NA	NA	NA	NA	NA	NA	2	2	1	0	0	0	1	1	1	1	1	0	0	0	0	0	0	0	0	0	0	0	0	0	0	0
SL373348	Early Relapse Multiple Myeloma	0.383519	-0.131274	Yes	Q3	0.457346	-0.543565	PR	1	0	0	71	139	1	NA	NA	NA	NA	NA	NA	NA	NA	NA	2	NA	0	0	0	1	1	0	1	0	0	0	0	0	0	0	0	0	0	0	0	0	0	0	0	0
SL373349	Newly Diagnosed Multiple Myeloma	-0.224328	-0.202264	No	Q2	-0.734809	-0.767097	MS	0	NA	NA	40	678	1	NA	NA	671	1	NA	NA	NA	NA	NA	2	2	0	0	1	0	1	0	0	0	0	0	0	0	0	0	0	0	0	0	0	0	0	0	0	0
SL373350	Early Relapse Multiple Myeloma	-0.0294654	-0.0104284	No	Q2	-0.0642424	-0.521678	CD2	0	0	0	61	33	1	NA	NA	NA	NA	NA	NA	NA	NA	NA	2	2	1	0	0	1	0	0	0	0	0	0	0	0	0	0	0	0	0	0	0	0	0	0	0	0
SL373351	Early Relapse Multiple Myeloma	0.392599	0.060812	Yes	Q4	0.754674	-0.415246	PR	0	0	0	54	89	1	NA	NA	NA	NA	NA	NA	NA	NA	NA	3	3	0	0	0	0	0	1	1	1	0	0	0	0	0	0	0	0	0	0	0	0	0	0	0	0
SL373352	Newly Diagnosed Multiple Myeloma	0.0223987	-0.114947	Yes	Q3	-0.281262	-0.821746	LB	1	0	0	72	713	0	NA	NA	668	0	NA	NA	NA	NA	NA	1	2	0	0	0	0	0	0	1	0	0	0	0	0	0	0	0	0	0	0	0	0	0	0	0	0
SL373353	Newly Diagnosed Multiple Myeloma	-0.0650135	-0.027241	No	Q2	0.0716051	-0.423939	HY	1	0	0	58	985	0	NA	NA	138	1	NA	NA	NA	NA	NA	2	2	0	0	0	0	0	0	0	0	0	0	0	0	0	0	0	0	0	0	0	0	0	0	0	0
SL373354	Newly Diagnosed Multiple Myeloma	-0.0960967	-0.0564726	No	Q2	-0.296585	-0.67347	LB	1	1	0	64	832	0	NA	NA	805	0	NA	NA	NA	NA	NA	1	1	0	0	0	0	0	0	0	0	0	0	0	0	0	0	0	0	0	0	0	0	0	0	0	0
SL373355	Early Relapse Multiple Myeloma	-0.30059	0.192054	No	Q1	-0.226777	0.197846	MF	0	0	0	69	1071	0	NA	NA	NA	NA	NA	NA	NA	NA	NA	NA	NA	0	0	0	0	0	0	0	0	0	0	0	0	0	0	1	0	0	0	0	1	0	0	0	0
SL373356	Early Relapse Multiple Myeloma	0.319839	0.137082	Yes	Q4	0.503283	-0.320577	MS	0	0	1	58	118	1	NA	NA	NA	NA	NA	NA	NA	NA	NA	NA	NA	0	0	1	0	1	0	1	1	0	0	0	0	0	0	0	0	0	0	0	0	0	0	0	0
SL373357	Late Relapse Multiple Myeloma	0.280379	0.0605945	Yes	Q4	0.607336	-0.183339	CD1	0	0	0	70	130	1	NA	NA	NA	NA	NA	NA	NA	NA	NA	2	2	1	0	0	0	1	1	1	1	1	0	0	1	0	0	0	0	0	0	0	0	0	0	0	0
SL373358	Newly Diagnosed Multiple Myeloma	-0.229775	-0.0916793	No	Q2	-0.687626	-0.686365	MS	0	NA	NA	40	678	1	NA	NA	671	1	NA	NA	NA	NA	NA	2	2	0	0	1	0	1	0	0	0	0	0	0	0	0	0	0	0	0	0	0	0	0	0	0	0
SL373367	Early Relapse Multiple Myeloma	-0.131371	0.113548	No	Q1	-0.156374	-0.250389	CD1	1	0	0	71	664	0	NA	NA	NA	NA	NA	NA	NA	NA	NA	2	2	1	0	0	0	1	0	0	0	0	0	0	0	0	0	0	0	0	0	0	0	0	0	0	0
SL373368	Newly Diagnosed Multiple Myeloma	-0.0347875	-0.306448	No	Q2	0.0566365	-0.44938	LB	1	0	0	78	375	0	NA	NA	529	1	NA	NA	NA	NA	NA	1	2	0	0	0	1	0	1	1	1	0	0	0	0	0	0	0	0	0	0	1	0	0	0	0	0
SL373369	Early Relapse Multiple Myeloma	0.0235507	-0.0189416	Yes	Q3	0.453319	-0.0475396	MS	1	1	0	66	902	1	NA	NA	NA	NA	NA	NA	NA	NA	NA	2	2	0	0	0	0	1	1	1	1	0	0	0	0	0	0	0	0	0	0	0	0	0	0	0	0
SL373370	Newly Diagnosed Multiple Myeloma	-0.0781503	-0.0339328	No	Q2	-0.315004	-0.556252	CD2	0	0	0	68	217	1	NA	NA	211	1	NA	NA	NA	NA	NA	1	1	1	0	0	0	0	0	0	0	0	0	0	0	0	0	0	0	0	0	0	0	0	0	0	0
SL373371	Early Relapse Multiple Myeloma	-0.0416638	0.05993	No	Q1	-0.162887	-0.324217	HY	0	0	0	53	1074	0	NA	NA	NA	NA	NA	NA	NA	NA	NA	1	NA	0	0	0	0	0	1	0	0	0	0	1	0	0	0	0	0	0	0	0	0	0	0	0	0
SL373372	Newly Diagnosed Multiple Myeloma	-0.0206433	-0.00744102	No	Q2	0.126029	-0.392134	MS	0	0	0	45	740	0	NA	NA	741	0	NA	NA	NA	NA	NA	2	2	0	0	1	0	1	0	1	1	0	0	0	0	0	0	0	0	0	0	0	0	0	0	0	0
SL373373	Late Relapse Multiple Myeloma	-0.298464	0.148954	No	Q1	-0.280585	0.0679183	HY	0	0	0	68	698	0	NA	NA	NA	NA	NA	NA	NA	NA	NA	1	1	0	0	0	0	1	0	1	0	0	0	0	0	0	0	0	0	0	0	0	0	0	0	0	0
SL373374	Newly Diagnosed Multiple Myeloma	0.0361969	-0.0802103	Yes	Q3	0.310255	-0.378965	LB	1	0	0	78	375	0	NA	NA	529	1	NA	NA	NA	NA	NA	1	2	0	0	0	1	0	1	1	1	0	0	0	0	0	0	0	0	0	0	1	0	0	0	0	0
SL373375	Early Relapse Multiple Myeloma	0.0566131	0.0166618	Yes	Q4	0.40198	-0.127016	MS	1	1	0	66	902	1	NA	NA	NA	NA	NA	NA	NA	NA	NA	2	2	0	0	0	0	1	1	1	1	0	0	0	0	0	0	1	0	0	0	0	0	0	0	0	0
SL373376	Newly Diagnosed Multiple Myeloma	-0.0537364	-0.00523552	No	Q2	0.0689087	-0.270086	MS	0	0	0	45	740	0	NA	NA	741	0	NA	NA	NA	NA	NA	2	2	0	0	1	0	1	0	1	1	0	0	0	0	0	0	0	0	0	0	0	0	0	0	0	0
SL373377	Early Relapse Multiple Myeloma	0.407733	0.105206	Yes	Q4	0.774668	-0.317104	PR	0	0	0	54	89	1	NA	NA	NA	NA	NA	NA	NA	NA	NA	3	3	0	0	0	0	0	1	1	1	1	0	0	0	0	0	0	0	0	0	0	0	0	0	0	0
SL375741	Newly Diagnosed Multiple Myeloma	-0.177104	-0.229275	No	Q2	-0.49671	-0.676781	HY	1	1	0	84	637	0	NA	NA	624	0	NA	NA	NA	NA	NA	3	2	0	0	0	0	1	0	0	0	0	0	0	0	0	0	0	0	0	0	0	0	0	0	0	0
SL375742	Smoldering Multiple Myeloma	0.0358706	-0.0177794	Yes	Q3	-0.259814	-0.608796	HY	1	0	0	82	264	1	264	0	NA	NA	1	0	0	1	2	NA	NA	0	0	0	0	1	0	0	0	0	0	0	0	0	0	0	0	0	0	0	0	0	0	0	0
SL375743	MGUS	-0.493275	0.0421397	No	Q1	-0.359998	0.494857	MF	0	NA	0	72	651	0	NA	NA	NA	NA	NA	NA	NA	NA	NA	NA	NA	NA	NA	NA	NA	NA	NA	NA	NA	NA	0	0	0	0	0	0	0	0	0	0	0	0	0	0	0
SL375744	Late Relapse Multiple Myeloma	0.149275	0.021516	Yes	Q4	0.526526	-0.0747269	PR	1	0	0	62	759	1	NA	NA	NA	NA	NA	NA	NA	NA	NA	2	2	0	1	0	0	1	1	1	1	1	0	0	0	0	0	0	0	0	0	0	0	0	0	0	1
SL375745	Newly Diagnosed Multiple Myeloma	-0.141647	-0.0916468	No	Q2	-0.361412	-0.707287	HY	0	0	0	76	686	0	NA	NA	680	0	NA	NA	NA	NA	NA	NA	NA	0	0	0	0	0	0	0	0	0	0	0	0	0	0	0	0	0	1	0	0	0	0	0	0
SL375746	Early Relapse Multiple Myeloma	-0.226013	0.0201523	No	Q1	-0.301584	0.184617	MF	0	0	0	60	1222	0	NA	NA	NA	NA	NA	NA	NA	NA	NA	2	2	0	0	0	0	0	0	0	0	0	0	0	0	0	0	0	0	0	0	0	0	0	0	0	0
SL375748	Early Relapse Multiple Myeloma	0.280133	0.0308331	Yes	Q4	0.290976	-0.0982387	CD1	0	0	0	62	496	1	NA	NA	NA	NA	NA	NA	NA	NA	NA	NA	NA	1	0	0	0	1	0	1	0	0	0	0	0	0	0	0	0	0	0	0	1	0	0	0	0
SL375749	Newly Diagnosed Multiple Myeloma	-0.0447621	-0.0894781	No	Q2	-0.321363	-0.595415	HY	1	0	1	65	749	0	NA	NA	695	0	NA	NA	NA	NA	NA	2	2	0	0	0	0	0	0	0	0	0	0	0	0	0	0	0	0	0	0	0	0	0	0	0	0
SL375750	Newly Diagnosed Multiple Myeloma	0.0831667	-0.125278	Yes	Q3	0.291219	-0.354319	CD1	0	0	0	52	987	0	NA	NA	980	0	NA	NA	NA	NA	NA	1	1	1	0	0	0	1	0	0	0	0	0	0	1	0	0	0	0	0	0	0	0	0	0	0	0
SL375751	Newly Diagnosed Multiple Myeloma	-0.00360238	-0.129553	No	Q2	-0.0951579	-0.375931	LB	0	0	0	59	133	1	NA	NA	105	1	NA	NA	NA	NA	NA	1	1	0	0	0	0	1	0	1	0	0	0	0	0	0	0	0	0	0	0	0	0	0	0	0	0
SL375752	Newly Diagnosed Multiple Myeloma	0.162424	0.204567	Yes	Q4	0.539918	0.0674269	PR	1	0	0	71	706	0	NA	NA	367	1	NA	NA	NA	NA	NA	3	3	0	0	0	0	1	0	1	0	0	0	0	0	0	0	0	0	0	0	0	0	0	0	0	0
SL375765	Newly Diagnosed Multiple Myeloma	-0.157262	-0.261166	No	Q2	-0.229667	-0.222916	CD2	0	0	0	58	868	0	NA	NA	853	0	NA	NA	NA	NA	NA	2	2	1	0	0	0	1	0	0	0	0	0	0	0	0	0	0	0	0	1	0	0	0	0	0	0
SL375766	Early Relapse Multiple Myeloma	0.241509	0.0569835	Yes	Q4	0.482951	0.147325	PR	1	1	0	70	122	1	NA	NA	NA	NA	NA	NA	NA	NA	NA	3	3	0	0	0	0	1	1	0	0	0	0	0	0	0	0	0	0	0	0	0	0	0	0	1	0
SL375767	Early Relapse Multiple Myeloma	0.0238745	-0.0249308	Yes	Q3	-0.0361894	-0.321588	HY	0	0	1	65	844	0	NA	NA	NA	NA	NA	NA	NA	NA	NA	1	1	0	0	0	0	0	0	0	0	0	0	0	0	0	0	0	0	0	0	0	0	0	0	0	0
SL375768	Early Relapse Multiple Myeloma	-0.00248766	-0.0450452	No	Q2	0.289386	0.00945869	HY	0	0	0	72	189	1	NA	NA	NA	NA	NA	NA	NA	NA	NA	NA	NA	0	0	0	0	0	0	0	0	0	0	1	0	0	0	0	0	0	0	0	0	0	0	0	0
SL375769	Late Relapse Multiple Myeloma	-0.0436006	-0.150363	No	Q2	-0.00347269	-0.352583	LB	0	0	0	61	407	1	NA	NA	NA	NA	NA	NA	NA	NA	NA	2	2	0	0	0	0	1	0	1	0	0	0	0	0	0	0	0	0	0	0	0	0	0	0	0	0
SL375770	Late Relapse Multiple Myeloma	0.112681	-0.054318	Yes	Q3	0.33109	-0.378513	LB	1	0	0	66	685	0	NA	NA	NA	NA	NA	NA	NA	NA	NA	2	2	0	0	0	1	1	0	1	0	0	0	0	0	0	0	0	0	0	1	0	0	0	0	1	0
SL375771	Late Relapse Multiple Myeloma	0.232234	-0.091514	Yes	Q3	0.170045	-0.720555	HY	0	0	0	50	185	0	NA	NA	NA	NA	NA	NA	NA	NA	NA	1	1	0	0	0	0	1	0	1	0	0	0	0	1	0	0	0	0	0	0	0	0	0	0	0	0
SL375772	Late Relapse Multiple Myeloma	-0.0835259	0.11015	No	Q1	0.307113	0.720713	PR	1	0	0	70	385	1	NA	NA	NA	NA	NA	NA	NA	NA	NA	2	NA	NA	NA	NA	NA	NA	NA	NA	NA	NA	0	0	0	0	0	0	0	0	0	0	0	0	0	0	0
SL375773	Late Relapse Multiple Myeloma	0.28949	0.0205244	Yes	Q4	0.245837	-0.577966	HY	1	NA	0	46	513	0	NA	NA	NA	NA	NA	NA	NA	NA	NA	1	NA	0	0	0	0	1	0	1	0	0	0	0	0	0	0	0	0	0	0	0	0	0	0	0	0
SL375774	Late Relapse Multiple Myeloma	0.415233	-0.051471	Yes	Q3	0.664043	-0.51591	PR	0	0	0	62	227	1	NA	NA	NA	NA	NA	NA	NA	NA	NA	3	3	0	0	1	0	1	0	1	1	0	0	0	1	0	0	0	0	0	0	0	0	0	0	0	0
SL375775	Late Relapse Multiple Myeloma	0.383726	-0.0309943	Yes	Q3	0.760069	-0.402759	MS	0	0	0	62	142	1	NA	NA	NA	NA	NA	NA	NA	NA	NA	3	3	0	0	1	0	1	0	1	1	0	0	0	0	0	0	0	0	0	0	0	0	0	0	0	0
SL375776	Late Relapse Multiple Myeloma	0.405104	-0.0636892	Yes	Q3	0.694754	-0.619542	MS	0	0	0	63	80	1	NA	NA	NA	NA	NA	NA	NA	NA	NA	2	2	0	0	1	0	1	0	1	1	0	0	0	0	0	0	0	0	0	0	0	0	0	0	0	0
SL375777	Early Relapse Multiple Myeloma	0.37792	0.0834576	Yes	Q4	0.715765	-0.245725	PR	1	0	0	69	588	0	NA	NA	NA	NA	NA	NA	NA	NA	NA	NA	NA	0	0	0	1	1	1	1	1	0	0	0	0	0	0	0	0	0	0	0	0	0	0	0	0
SL375778	Smoldering Multiple Myeloma	-0.210139	-0.190661	No	Q2	-0.181356	-0.0719935	CD2	0	1	0	60	185	0	529	0	NA	NA	0	0	1	1	2	NA	NA	1	0	0	0	1	0	1	0	0	0	0	0	0	0	0	0	0	0	0	0	0	0	0	0
SL375779	Late Relapse Multiple Myeloma	0.443513	0.0146056	Yes	Q4	0.386515	-0.561825	PR	0	0	0	58	275	1	NA	NA	NA	NA	NA	NA	NA	NA	NA	3	2	0	0	0	0	1	0	1	1	0	0	0	1	0	0	0	0	0	0	0	0	0	0	0	0
SL375780	Newly Diagnosed Multiple Myeloma	-0.0632359	-0.181459	No	Q2	-0.160925	-0.439143	CD2	1	0	0	69	1001	0	NA	NA	916	0	NA	NA	NA	NA	NA	2	2	1	0	0	0	1	0	0	0	0	0	0	0	0	0	0	0	0	0	0	1	0	0	0	0
SL375781	Early Relapse Multiple Myeloma	0.127816	0.0500426	Yes	Q4	0.267463	-0.105082	LB	0	0	0	80	301	1	NA	NA	NA	NA	NA	NA	NA	NA	NA	3	2	0	0	0	0	1	0	0	0	0	0	0	0	0	0	0	0	0	0	0	0	0	0	0	0
SL375782	Newly Diagnosed Multiple Myeloma	-0.259904	0.101095	No	Q1	-0.104916	0.335764	MF	0	0	0	88	637	0	NA	NA	1218	1	NA	NA	NA	NA	NA	2	2	0	0	0	0	1	1	0	0	0	0	0	0	0	0	0	0	0	0	0	0	0	0	0	0
SL375783	Newly Diagnosed Multiple Myeloma	0.0200657	-0.00116477	Yes	Q3	0.228712	-0.00908008	MS	0	0	1	59	832	0	NA	NA	436	1	NA	NA	NA	NA	NA	2	NA	NA	NA	NA	NA	NA	NA	NA	NA	NA	0	0	0	0	0	0	0	0	0	0	0	0	0	0	0
SL375784	Newly Diagnosed Multiple Myeloma	0.126971	-0.115373	Yes	Q3	-0.103768	-0.795845	HY	1	0	0	59	757	0	NA	NA	630	1	NA	NA	NA	NA	NA	2	2	0	0	0	0	1	0	1	0	0	0	0	0	0	0	0	0	0	0	0	0	0	0	0	0
SL375785	Late Relapse Multiple Myeloma	0.0409603	0.0279531	Yes	Q4	-0.198676	-0.497824	MS	1	0	0	66	258	0	NA	NA	NA	NA	NA	NA	NA	NA	NA	3	3	0	0	1	0	0	0	1	1	0	0	0	0	0	0	0	0	0	0	0	0	0	0	1	0
SL375786	Newly Diagnosed Multiple Myeloma	0.164091	-0.140677	Yes	Q3	0.0558745	-0.610891	CD2	0	0	0	54	681	0	NA	NA	710	0	NA	NA	NA	NA	NA	1	2	1	0	0	0	1	1	0	0	0	0	0	0	0	0	0	0	0	0	0	1	0	0	0	0
SL375787	Late Relapse Multiple Myeloma	0.468629	-0.0884196	Yes	Q3	0.880913	-0.22404	PR	1	NA	1	70	11	1	NA	NA	NA	NA	NA	NA	NA	NA	NA	NA	NA	0	0	0	0	1	0	1	0	0	0	0	0	0	0	0	0	0	0	0	0	0	0	0	1
SL375788	Late Relapse Multiple Myeloma	-0.322706	0.196351	No	Q1	-0.148518	0.436107	HY	0	0	0	68	698	0	NA	NA	NA	NA	NA	NA	NA	NA	NA	1	1	0	0	0	0	1	0	1	0	0	0	0	0	0	0	0	0	0	0	0	0	0	0	0	0
SL390296	Late Relapse Multiple Myeloma	-0.0564253	0.15757	No	Q1	0.134164	0.106394	PR	0	0	0	79	14	1	NA	NA	NA	NA	NA	NA	NA	NA	NA	NA	NA	0	0	0	0	0	1	1	1	0	0	0	0	0	0	0	0	0	0	0	0	0	0	0	0
SL390297	Early Relapse Multiple Myeloma	-0.118191	-0.00428347	No	Q2	-0.0115987	-0.0923282	HY	1	1	0	66	35	1	NA	NA	NA	NA	NA	NA	NA	NA	NA	NA	NA	0	0	0	0	0	0	0	0	0	0	0	1	1	0	0	0	0	0	0	0	0	0	0	0
SL390298	Newly Diagnosed Multiple Myeloma	0.108309	-0.0102885	Yes	Q3	-0.0970223	-0.446995	HY	1	0	0	71	475	0	NA	NA	78	1	NA	NA	NA	NA	NA	2	2	0	0	0	0	0	0	0	0	0	0	0	0	0	0	0	0	0	1	0	0	0	0	0	0
SL390320	Early Relapse Multiple Myeloma	-0.10529	-0.104586	No	Q2	-0.111563	-0.345299	CD2	1	0	0	72	586	0	NA	NA	NA	NA	NA	NA	NA	NA	NA	2	NA	0	0	0	0	0	0	0	0	0	0	0	0	0	0	0	0	0	0	0	0	0	0	0	0
SL390321	Late Relapse Multiple Myeloma	-0.0408367	-0.0285404	No	Q2	0.112786	-0.189499	MS	0	0	0	70	218	1	NA	NA	NA	NA	NA	NA	NA	NA	NA	2	2	0	0	1	0	1	0	1	1	1	0	0	0	0	0	0	0	0	0	0	0	0	0	0	0
SL390322	Newly Diagnosed Multiple Myeloma	0.0968791	-0.070807	Yes	Q3	0.356171	-0.457074	LB	0	0	0	60	538	0	NA	NA	477	0	NA	NA	NA	NA	NA	NA	NA	0	0	0	0	1	0	1	0	0	0	0	0	0	0	0	0	0	0	0	0	0	0	0	0
SL390323	Newly Diagnosed Multiple Myeloma	0.248016	-0.106807	Yes	Q3	0.67503	-0.372044	CD2	0	0	0	64	648	0	NA	NA	232	1	NA	NA	NA	NA	NA	2	2	1	0	0	0	1	0	0	0	0	0	0	0	0	0	0	0	0	0	0	0	0	0	0	0
SL390324	MGUS	-0.255758	0.0569478	No	Q1	-0.228928	0.0615508	MF	1	0	0	65	393	0	NA	NA	NA	NA	NA	NA	NA	NA	NA	NA	NA	0	0	0	0	0	0	0	0	0	0	0	0	0	0	0	0	0	0	0	0	0	0	0	0
SL390344	Newly Diagnosed Multiple Myeloma	0.201093	-0.181575	Yes	Q3	0.0203732	-0.811917	CD2	0	0	1	60	545	0	NA	NA	607	1	NA	NA	NA	NA	NA	1	NA	1	0	0	0	0	0	0	0	0	0	0	0	0	0	0	0	0	0	0	0	0	0	0	0
SL390345	Late Relapse Multiple Myeloma	0.0277098	-0.0633968	Yes	Q3	-0.0263926	-0.530268	HY	0	0	0	62	517	0	NA	NA	NA	NA	NA	NA	NA	NA	NA	2	2	0	0	0	0	0	0	0	0	0	0	0	0	0	0	0	0	0	0	0	0	0	0	0	0
SL390346	Newly Diagnosed Multiple Myeloma	0.130044	0.000333589	Yes	Q4	0.321675	-0.561172	HY	0	0	0	66	335	1	NA	NA	317	1	NA	NA	NA	NA	NA	2	2	0	0	0	0	0	0	0	0	0	0	0	0	0	0	0	0	0	0	0	0	0	0	0	0
SL390347	Newly Diagnosed Multiple Myeloma	0.201783	0.0404755	Yes	Q4	0.319152	-0.420525	PR	0	0	1	78	505	0	NA	NA	162	1	NA	NA	NA	NA	NA	1	1	0	0	0	0	1	0	1	0	0	0	0	0	0	0	0	0	0	0	0	0	0	1	0	0
SL390348	MGUS	-0.0352753	0.0176185	No	Q1	0.023831	-0.387764	MF	1	0	0	66	490	0	NA	NA	NA	NA	NA	NA	NA	NA	NA	NA	NA	0	0	0	0	1	0	1	0	0	0	0	0	0	0	0	0	0	0	0	0	0	0	0	0
SL391434	Newly Diagnosed Multiple Myeloma	0.0857505	0.0706442	Yes	Q4	-0.0906112	-0.291563	CD1	0	0	0	60	539	0	NA	NA	403	1	NA	NA	NA	NA	NA	NA	NA	0	0	0	0	1	0	0	0	0	0	0	0	0	0	0	0	0	0	0	0	0	0	0	0
SL391435	Newly Diagnosed Multiple Myeloma	-0.0298193	-0.275354	No	Q2	0.288092	-0.226423	LB	1	0	0	63	651	0	NA	NA	196	1	NA	NA	NA	NA	NA	1	1	0	0	0	0	1	0	1	0	0	0	0	0	0	0	0	0	0	0	0	0	0	0	0	1
SL391436	Early Relapse Multiple Myeloma	-0.0474194	-0.0610988	No	Q2	-0.35398	-0.486469	CD2	1	0	0	64	526	0	NA	NA	NA	NA	NA	NA	NA	NA	NA	2	2	1	0	0	0	0	0	1	0	0	0	0	0	0	0	0	0	0	0	0	0	0	0	0	0
SL391457	Smoldering Multiple Myeloma	0.0906124	-0.095612	Yes	Q3	0.48047	0.117262	CD2	1	0	0	57	472	0	119	1	NA	NA	1	0	1	2	3	NA	NA	1	0	0	0	1	0	0	0	0	0	0	0	0	0	0	0	0	0	0	0	0	0	0	0
SL391458	Early Relapse Multiple Myeloma	-0.123039	0.184665	No	Q1	0.259173	0.470765	HY	1	1	0	61	497	0	NA	NA	NA	NA	NA	NA	NA	NA	NA	NA	NA	0	0	0	0	0	0	0	0	0	0	0	0	0	0	0	0	0	0	0	0	0	0	0	0
SL391459	Early Relapse Multiple Myeloma	-0.0806247	-0.150625	No	Q2	-0.0162801	-0.38494	MS	1	0	0	76	593	0	NA	NA	NA	NA	NA	NA	NA	NA	NA	1	NA	0	0	1	0	1	0	1	1	0	0	0	0	0	0	0	0	0	0	0	0	0	0	0	0
SL391460	Late Relapse Multiple Myeloma	0.0331219	-0.0487321	Yes	Q3	0.493084	-0.163544	LB	1	0	0	66	587	0	NA	NA	NA	NA	NA	NA	NA	NA	NA	2	2	0	0	0	1	1	0	1	0	0	0	0	0	0	1	0	0	0	1	0	0	0	1	1	0
SL391461	Late Relapse Multiple Myeloma	0.00300116	-0.0993571	Yes	Q3	0.189162	-0.125904	MS	0	0	0	64	649	0	NA	NA	NA	NA	NA	NA	NA	NA	NA	1	2	0	0	1	0	1	0	1	1	0	0	0	0	0	0	0	0	0	0	0	0	0	0	0	0
SL391462	Late Relapse Multiple Myeloma	-0.000331194	-0.013629	No	Q2	0.0311756	-0.380619	MS	0	NA	1	66	313	1	NA	NA	NA	NA	NA	NA	NA	NA	NA	2	NA	0	0	0	1	0	1	0	0	0	0	0	0	0	0	0	0	0	1	0	0	0	0	0	0
SL391463	Early Relapse Multiple Myeloma	0.330473	-0.11791	Yes	Q3	0.316156	-0.499259	CD2	0	0	1	77	478	0	NA	NA	NA	NA	NA	NA	NA	NA	NA	NA	NA	1	0	0	0	0	0	1	0	0	0	0	0	0	0	0	0	0	0	0	0	0	0	0	0
SL391464	Newly Diagnosed Multiple Myeloma	0.414026	-0.00902108	Yes	Q3	0.330165	-0.639432	CD1	0	0	0	72	524	0	NA	NA	134	1	NA	NA	NA	NA	NA	3	3	1	0	0	0	0	0	0	0	0	0	0	0	0	0	0	0	0	0	0	0	0	0	0	0
SL391480	Late Relapse Multiple Myeloma	0.348969	0.15181	Yes	Q4	1.0605	-0.212924	PR	1	0	0	79	106	1	NA	NA	NA	NA	NA	NA	NA	NA	NA	NA	NA	0	0	0	0	1	1	1	1	0	0	0	0	0	0	0	0	0	0	0	0	0	0	0	0
SL391481	Late Relapse Multiple Myeloma	0.10617	0.0301222	Yes	Q4	0.25957	-0.608072	LB	0	0	0	61	250	1	NA	NA	NA	NA	NA	NA	NA	NA	NA	3	3	0	0	0	0	1	0	1	0	0	0	0	0	0	0	0	0	0	0	0	0	0	0	0	0
SL391482	Early Relapse Multiple Myeloma	0.391019	0.0728714	Yes	Q4	0.936808	-0.374224	PR	1	0	0	76	274	1	NA	NA	NA	NA	NA	NA	NA	NA	NA	3	3	0	0	1	0	0	0	1	1	0	0	0	0	0	0	0	0	0	0	0	0	0	0	0	0
SL391483	Late Relapse Multiple Myeloma	0.302502	-0.0613105	Yes	Q3	0.477395	-0.559966	CD1	0	0	0	70	196	1	NA	NA	NA	NA	NA	NA	NA	NA	NA	3	NA	1	0	0	0	1	1	0	0	0	0	0	0	0	1	0	0	0	0	0	0	0	0	0	0
SL391484	Newly Diagnosed Multiple Myeloma	0.39499	0.117851	Yes	Q4	0.653722	-0.484797	PR	0	0	0	86	181	0	NA	NA	154	0	NA	NA	NA	NA	NA	1	2	0	0	0	0	1	1	0	1	0	0	0	0	0	0	0	0	0	0	0	0	0	0	0	0
SL391485	Early Relapse Multiple Myeloma	0.106773	0.0596573	Yes	Q4	0.0497818	-0.25264	CD1	0	0	0	66	167	0	NA	NA	NA	NA	NA	NA	NA	NA	NA	1	1	1	0	0	0	1	0	0	0	0	0	0	0	0	0	0	0	0	0	0	0	0	0	0	0
SL399173	Newly Diagnosed Multiple Myeloma	-0.482789	0.271732	No	Q1	-0.496977	0.231471	MF	0	0	0	74	235	1	NA	NA	65	1	NA	NA	NA	NA	NA	2	2	0	0	0	0	0	0	0	0	0	0	0	0	0	0	0	0	0	0	0	0	0	0	0	0
SL399174	Late Relapse Multiple Myeloma	0.274289	0.189312	Yes	Q4	0.869789	0.179793	MS	1	0	0	73	468	0	NA	NA	NA	NA	NA	NA	NA	NA	NA	NA	NA	0	0	1	1	1	0	0	0	0	0	0	0	0	0	0	0	0	0	0	0	0	0	0	0
SL399197	Newly Diagnosed Multiple Myeloma	-0.0789369	0.0622277	No	Q1	0.028254	-0.0102271	MS	0	0	0	58	436	0	NA	NA	881	0	NA	NA	NA	NA	NA	NA	NA	0	0	0	0	1	0	0	0	0	0	0	0	1	0	0	0	0	0	0	0	0	0	1	0
SL399198	Early Relapse Multiple Myeloma	0.183813	0.146492	Yes	Q4	0.821846	-0.164588	CD1	1	0	0	75	357	0	NA	NA	NA	NA	NA	NA	NA	NA	NA	NA	NA	0	0	0	0	1	0	0	0	0	0	0	0	1	0	0	0	0	0	0	0	0	0	0	1
SL399199	Early Relapse Multiple Myeloma	0.297669	0.120274	Yes	Q4	0.93129	0.1046	CD2	0	0	0	62	447	0	NA	NA	NA	NA	NA	NA	NA	NA	NA	NA	NA	1	0	0	0	0	0	1	1	0	0	0	1	0	0	0	0	0	0	0	0	0	0	0	0
SL399200	Late Relapse Multiple Myeloma	0.0946946	0.0884879	Yes	Q4	0.215866	-0.421713	HY	0	0	0	63	425	0	NA	NA	NA	NA	NA	NA	NA	NA	NA	3	2	0	0	0	0	0	0	0	0	0	0	0	0	0	0	0	0	0	0	0	0	0	0	0	0
SL399201	Newly Diagnosed Multiple Myeloma	-0.403637	0.287718	No	Q1	0.101944	0.710021	MF	0	1	0	69	153	0	NA	NA	295	0	NA	NA	NA	NA	NA	1	2	0	0	0	0	0	0	0	0	0	0	0	0	0	0	0	0	0	0	0	0	0	0	0	0
SL399202	Early Relapse Multiple Myeloma	-0.116449	0.0175918	No	Q1	-0.0334612	0.0813562	CD2	0	0	0	67	441	0	NA	NA	NA	NA	NA	NA	NA	NA	NA	NA	NA	NA	NA	NA	NA	NA	NA	NA	NA	NA	0	0	0	0	0	0	0	0	0	0	0	0	0	0	0
SL399203	Early Relapse Multiple Myeloma	0.18119	0.047514	Yes	Q4	0.485204	-0.082052	CD2	0	0	1	51	439	0	NA	NA	NA	NA	NA	NA	NA	NA	NA	1	2	1	0	0	0	0	0	0	0	0	0	0	0	0	0	0	0	0	0	0	0	0	0	0	0
SL399204	Newly Diagnosed Multiple Myeloma	-0.181487	0.155362	No	Q1	-0.113203	-0.126951	HY	0	0	0	69	414	0	NA	NA	959	0	NA	NA	NA	NA	NA	NA	NA	0	0	0	0	1	0	0	0	0	0	0	0	0	0	0	0	0	0	0	0	0	0	0	0
SL399315	Late Relapse Multiple Myeloma	-0.348137	0.270206	No	Q1	-0.103806	0.664101	MF	1	0	0	71	532	0	NA	NA	NA	NA	NA	NA	NA	NA	NA	NA	NA	NA	NA	NA	NA	NA	NA	NA	NA	NA	0	0	0	0	0	0	0	0	0	0	0	0	0	0	0
SL399316	Early Relapse Multiple Myeloma	0.0169685	-0.105179	Yes	Q3	0.237424	-0.228536	LB	1	0	0	43	386	0	NA	NA	NA	NA	NA	NA	NA	NA	NA	1	1	0	0	0	0	1	0	1	0	0	0	0	0	0	0	0	0	0	0	0	0	0	0	0	0
SL399317	Newly Diagnosed Multiple Myeloma	-0.159012	-0.0553456	No	Q2	-0.214521	-0.656071	LB	1	0	1	68	512	0	NA	NA	484	0	NA	NA	NA	NA	NA	NA	NA	0	0	0	0	0	0	0	0	0	0	0	0	0	0	0	0	0	0	0	0	0	0	0	0
SL399318	Early Relapse Multiple Myeloma	-0.153837	-0.0311556	No	Q2	0.0510168	0.0740926	CD2	0	1	0	63	469	0	NA	NA	NA	NA	NA	NA	NA	NA	NA	1	NA	NA	NA	NA	NA	NA	NA	NA	NA	NA	0	0	0	0	0	0	0	0	0	0	0	0	0	0	0
SL399319	Early Relapse Multiple Myeloma	0.238478	0.0017221	Yes	Q4	0.747635	-0.443089	CD1	0	0	0	62	404	0	NA	NA	NA	NA	NA	NA	NA	NA	NA	2	2	1	0	0	0	1	1	0	1	0	0	0	0	0	0	0	0	0	0	0	0	0	0	0	0
SL399320	Late Relapse Multiple Myeloma	0.186396	0.0318373	Yes	Q4	0.667871	-0.0718524	MF	1	0	1	48	76	1	NA	NA	NA	NA	NA	NA	NA	NA	NA	NA	NA	0	0	0	0	1	0	0	0	0	0	0	0	0	0	0	0	0	0	0	0	0	0	0	0
SL399321	Early Relapse Multiple Myeloma	0.276543	0.0947754	Yes	Q4	1.04402	-0.122078	CD1	1	0	0	68	285	0	NA	NA	NA	NA	NA	NA	NA	NA	NA	NA	NA	1	0	0	0	0	0	0	0	0	1	0	0	1	0	0	0	0	0	0	0	0	0	0	0
SL399322	Early Relapse Multiple Myeloma	0.141693	0.143085	Yes	Q4	0.452053	0.175338	PR	0	0	0	63	366	0	NA	NA	NA	NA	NA	NA	NA	NA	NA	NA	NA	NA	NA	NA	NA	NA	NA	NA	NA	NA	0	0	0	0	0	0	0	0	0	0	0	0	0	0	0
SL399323	Early Relapse Multiple Myeloma	0.120647	0.0921777	Yes	Q4	0.287826	-0.089578	LB	1	0	0	42	368	0	NA	NA	NA	NA	NA	NA	NA	NA	NA	1	NA	NA	NA	NA	NA	NA	NA	NA	NA	NA	0	0	0	0	0	0	0	0	0	0	0	0	0	0	0
SL399324	Newly Diagnosed Multiple Myeloma	0.0561938	0.249396	Yes	Q4	0.712608	0.412835	CD2	0	0	0	56	385	0	NA	NA	497	0	NA	NA	NA	NA	NA	1	1	1	0	0	0	1	0	1	0	0	0	0	0	0	0	0	0	0	0	0	0	0	0	0	0
SL399325	Newly Diagnosed Multiple Myeloma	0.261845	-0.0351403	Yes	Q3	0.678724	-0.407957	LB	0	0	0	73	328	0	NA	NA	315	1	NA	NA	NA	NA	NA	2	2	0	0	0	0	1	0	1	0	0	0	0	0	0	1	0	0	0	0	0	0	0	0	0	0
SL399326	Newly Diagnosed Multiple Myeloma	0.0431117	0.0481653	Yes	Q4	0.297499	-0.264627	LB	1	0	0	78	307	0	NA	NA	311	0	NA	NA	NA	NA	NA	2	2	0	0	0	0	1	0	1	0	0	0	0	0	0	0	0	0	0	0	0	0	0	0	0	1
SL399327	Newly Diagnosed Multiple Myeloma	0.320241	0.0345035	Yes	Q4	0.216866	-0.653175	HY	0	0	0	46	350	0	NA	NA	326	0	NA	NA	NA	NA	NA	3	3	0	0	0	0	1	1	1	1	0	0	0	0	0	1	0	0	0	0	0	0	0	0	0	0
SL399339	Early Relapse Multiple Myeloma	-0.131887	0.128479	No	Q1	0.0228906	-0.0922506	CD2	0	0	0	70	335	0	NA	NA	NA	NA	NA	NA	NA	NA	NA	1	NA	NA	NA	NA	NA	NA	NA	NA	NA	NA	0	0	0	0	0	0	0	0	0	0	0	0	0	0	0
SL399340	MGUS	-0.0682847	0.0168753	No	Q1	-0.060442	-0.301626	LB	0	1	0	76	25	0	NA	NA	NA	NA	NA	NA	NA	NA	NA	NA	NA	0	0	0	0	0	0	0	0	0	0	0	0	0	0	0	0	0	0	0	0	0	0	0	0
SL399341	Late Relapse Multiple Myeloma	0.426678	0.0577679	Yes	Q4	0.755654	-0.541599	PR	1	0	0	75	59	0	NA	NA	NA	NA	NA	NA	NA	NA	NA	3	NA	0	0	0	0	1	0	1	0	0	0	0	0	0	0	0	0	0	0	0	0	0	0	0	0
SL399342	Early Relapse Multiple Myeloma	-0.00830059	0.0640929	No	Q1	0.0905952	-0.24608	CD2	0	0	0	80	92	0	NA	NA	NA	NA	NA	NA	NA	NA	NA	3	2	1	0	0	0	0	0	0	0	0	0	0	0	0	0	0	0	0	1	0	0	0	0	0	0
SL399343	Early Relapse Multiple Myeloma	0.314238	0.0807262	Yes	Q4	0.578417	-0.0946998	CD1	0	0	1	41	513	0	NA	NA	NA	NA	NA	NA	NA	NA	NA	2	2	1	0	0	0	1	0	0	0	0	0	0	0	0	0	0	0	0	0	0	0	0	0	0	0
SL399344	Smoldering Multiple Myeloma	-0.0109652	-0.0186202	No	Q2	0.218152	-0.273978	LB	1	0	0	68	503	0	110	0	NA	NA	1	1	0	1	3	NA	NA	0	0	0	0	1	0	1	0	0	0	0	0	0	0	0	0	0	0	0	0	0	0	0	0
SL399345	Early Relapse Multiple Myeloma	-0.21495	0.334951	No	Q1	0.229485	0.702814	MF	0	0	0	79	430	0	NA	NA	NA	NA	NA	NA	NA	NA	NA	NA	NA	0	0	0	0	0	0	0	0	0	0	0	0	0	0	0	0	0	0	0	0	0	0	0	0
SL399346	Early Relapse Multiple Myeloma	0.167896	0.127577	Yes	Q4	0.581819	-0.129771	CD1	0	0	0	70	86	0	NA	NA	NA	NA	NA	NA	NA	NA	NA	1	1	1	0	0	0	0	0	0	0	0	0	0	0	0	0	0	0	0	1	0	0	0	0	0	0
SL399347	Smoldering Multiple Myeloma	-0.36384	-0.072348	No	Q2	-0.266877	3.71e-05	MF	0	0	0	78	358	0	1371	0	NA	NA	0	0	1	1	2	NA	NA	1	0	0	0	0	0	0	0	0	0	0	0	0	0	0	0	0	0	0	0	0	0	0	0
SL399348	Early Relapse Multiple Myeloma	-0.0598652	0.0194796	No	Q1	0.115893	-0.386379	MS	1	0	0	71	147	0	NA	NA	NA	NA	NA	NA	NA	NA	NA	NA	NA	0	0	0	0	0	0	1	0	0	0	0	0	0	0	0	0	0	0	0	0	0	0	1	0
SL399349	Early Relapse Multiple Myeloma	-0.0815128	-0.00260095	No	Q2	-0.00189655	-0.14105	LB	1	0	1	66	3	0	NA	NA	NA	NA	NA	NA	NA	NA	NA	2	2	0	0	0	0	1	0	1	0	0	0	0	0	0	0	0	0	0	0	0	0	0	0	0	0
SL399350	Early Relapse Multiple Myeloma	0.0347698	0.140249	Yes	Q4	0.0533951	0.100705	MS	1	0	0	60	389	0	NA	NA	NA	NA	NA	NA	NA	NA	NA	1	2	0	0	1	0	1	0	0	0	0	0	0	0	0	0	0	0	0	0	0	0	0	0	0	0
SL399351	MGUS	-0.0624167	-0.0542206	No	Q2	-0.236568	-0.371423	MF	1	0	0	77	275	0	NA	NA	NA	NA	NA	NA	NA	NA	NA	NA	NA	0	0	0	0	0	0	0	0	0	0	0	0	0	0	0	0	0	0	0	0	0	0	0	0
SL399352	MGUS	-0.302915	0.120656	No	Q1	-0.214812	0.130202	MF	1	0	1	52	76	0	NA	NA	NA	NA	NA	NA	NA	NA	NA	NA	NA	0	0	0	0	1	0	0	0	0	0	0	0	0	0	0	0	0	0	0	0	0	0	0	0
SL399353	Early Relapse Multiple Myeloma	0.292607	0.04435	Yes	Q4	0.15409	-0.880606	HY	1	0	0	67	300	0	NA	NA	NA	NA	NA	NA	NA	NA	NA	NA	NA	0	0	0	0	0	0	1	0	0	0	1	0	0	0	0	0	0	0	0	0	0	0	0	0
SL399354	Early Relapse Multiple Myeloma	0.126209	0.0254834	Yes	Q4	0.849448	0.0558323	MS	1	0	1	44	197	0	NA	NA	NA	NA	NA	NA	NA	NA	NA	1	2	0	0	1	1	1	0	1	1	0	0	0	0	0	0	0	0	0	0	0	0	0	0	0	0
SL404277	MGUS	-0.0758388	0.017431	No	Q1	-0.020714	-0.167044	LB	1	0	0	60	7	0	NA	NA	NA	NA	NA	NA	NA	NA	NA	NA	NA	0	0	0	0	0	0	0	0	0	0	0	0	0	1	0	0	0	0	0	0	0	0	0	0
SL404278	Early Relapse Multiple Myeloma	0.192859	-0.0151347	Yes	Q3	0.378474	-0.330144	PR	1	0	0	59	139	1	NA	NA	NA	NA	NA	NA	NA	NA	NA	3	3	0	1	0	0	0	0	0	0	0	0	0	0	0	0	0	0	0	0	0	0	0	0	0	0
SL404301	Early Relapse Multiple Myeloma	-0.0768011	0.0766985	No	Q1	0.194262	0.0637661	MF	0	1	0	63	109	0	NA	NA	NA	NA	NA	NA	NA	NA	NA	NA	NA	0	1	0	0	0	1	1	1	1	0	0	0	0	0	0	0	0	1	0	0	0	0	0	0
SL404302	Late Relapse Multiple Myeloma	-0.241561	0.300868	No	Q1	0.327981	0.933021	MF	0	0	0	76	635	0	NA	NA	NA	NA	NA	NA	NA	NA	NA	NA	NA	0	0	0	0	0	0	0	0	0	0	0	0	0	0	0	0	0	0	0	0	0	0	0	0
SL404303	Early Relapse Multiple Myeloma	0.0429032	0.0557874	Yes	Q4	0.218851	-0.00877665	PR	0	0	0	63	478	0	NA	NA	NA	NA	NA	NA	NA	NA	NA	NA	NA	1	0	0	0	1	0	1	0	0	0	0	0	0	0	0	0	0	0	0	0	0	0	0	0
SL404304	MGUS	-0.296154	0.151138	No	Q1	0.131083	0.622668	MF	0	0	0	80	344	0	NA	NA	NA	NA	NA	NA	NA	NA	NA	NA	NA	1	0	0	0	0	0	0	0	0	0	0	0	0	0	0	0	0	0	0	0	0	0	0	0
SL404305	Smoldering Multiple Myeloma	0.120692	-0.0302778	Yes	Q3	0.302207	-0.254634	CD2	0	0	0	63	550	0	1587	0	NA	NA	1	1	1	2	3	NA	NA	1	0	0	0	0	0	0	0	0	0	0	0	0	0	0	0	0	0	0	0	0	0	0	0
SL404325	Smoldering Multiple Myeloma	-0.34348	0.0304192	No	Q1	-0.266175	0.161078	MF	1	0	0	56	616	0	364	1	NA	NA	1	1	0	2	3	NA	NA	NA	NA	NA	NA	NA	NA	NA	NA	NA	0	0	0	0	0	0	0	0	0	0	0	0	0	0	0
SL404326	Late Relapse Multiple Myeloma	0.116403	0.0539299	Yes	Q4	0.0466153	-0.655908	HY	1	1	0	74	559	0	NA	NA	NA	NA	NA	NA	NA	NA	NA	NA	NA	0	0	0	0	0	0	0	0	0	0	0	0	0	0	0	0	0	0	0	0	0	0	0	0
SL404327	Late Relapse Multiple Myeloma	0.0437789	0.0807012	Yes	Q4	0.39764	0.144473	MS	1	0	1	43	402	0	NA	NA	NA	NA	NA	NA	NA	NA	NA	NA	NA	0	0	0	1	1	0	1	0	0	0	0	0	0	0	0	0	0	0	0	0	0	0	0	0
SL404328	Late Relapse Multiple Myeloma	0.0194252	0.161594	Yes	Q4	0.205357	0.216071	PR	0	0	0	48	144	1	NA	NA	NA	NA	NA	NA	NA	NA	NA	NA	NA	0	0	0	0	0	0	0	0	0	0	0	0	0	0	0	0	0	0	0	0	0	0	0	1
SL404329	Early Relapse Multiple Myeloma	-0.0997528	0.0704373	No	Q1	0.06167	-0.11376	HY	0	0	0	35	575	0	NA	NA	NA	NA	NA	NA	NA	NA	NA	NA	NA	0	0	0	1	1	1	0	1	0	0	0	0	0	0	0	0	0	0	0	0	1	0	0	0
SL404330	MGUS	-0.152276	0.010739	No	Q1	-0.257736	-0.0774862	MF	1	0	0	64	168	0	NA	NA	NA	NA	NA	NA	NA	NA	NA	NA	NA	1	0	0	0	0	0	0	0	0	0	0	0	0	0	0	0	0	0	0	0	0	0	0	0
SL404331	Newly Diagnosed Multiple Myeloma	0.253235	0.0812107	Yes	Q4	0.750991	-0.0596426	CD2	0	0	0	64	498	0	NA	NA	492	0	NA	NA	NA	NA	NA	1	1	1	0	0	0	1	0	0	0	0	0	1	0	0	0	0	0	0	0	0	0	0	0	0	0
SL404349	Late Relapse Multiple Myeloma	0.136705	0.0233406	Yes	Q4	0.729087	0.229574	LB	1	1	0	66	428	1	NA	NA	NA	NA	NA	NA	NA	NA	NA	NA	NA	0	0	0	0	1	1	1	1	0	0	0	0	0	0	0	0	0	0	0	0	0	0	0	0
SL405557	Newly Diagnosed Multiple Myeloma	-0.31779	0.139014	No	Q1	-0.258639	-0.0685076	HY	0	0	0	72	318	0	NA	NA	589	0	NA	NA	NA	NA	NA	1	1	0	0	0	0	0	0	0	0	0	0	0	1	0	0	0	0	0	0	0	0	0	0	0	0
SL405581	Newly Diagnosed Multiple Myeloma	0.176187	0.0212235	Yes	Q4	0.575723	-0.23559	LB	1	0	0	70	388	0	NA	NA	372	0	NA	NA	NA	NA	NA	1	1	0	0	0	0	1	0	0	0	0	0	0	0	0	0	0	0	0	0	1	0	0	0	0	0
SL405582	MGUS	-0.294271	0.147256	No	Q1	0.305386	0.605277	HY	0	0	0	54	215	0	NA	NA	NA	NA	NA	NA	NA	NA	NA	NA	NA	0	0	0	0	1	0	0	0	0	0	0	0	0	0	0	0	0	0	0	0	0	0	0	0
SL405583	MGUS	-0.306751	0.0871344	No	Q1	-0.0118881	0.318292	LB	0	0	0	70	0	0	NA	NA	NA	NA	NA	NA	NA	NA	NA	NA	NA	0	0	0	0	0	0	0	0	0	0	0	0	0	0	0	0	0	0	0	0	0	0	0	0
SL405605	Late Relapse Multiple Myeloma	0.114563	-0.00413005	Yes	Q3	0.406992	-0.106565	MS	0	0	0	64	419	0	NA	NA	NA	NA	NA	NA	NA	NA	NA	3	3	0	0	1	0	1	0	1	1	0	0	0	0	0	0	0	0	0	0	0	0	0	0	0	0
SL405606	Early Relapse Multiple Myeloma	0.316112	0.0243825	Yes	Q4	0.749976	-0.537022	LB	0	0	0	75	0	0	NA	NA	NA	NA	NA	NA	NA	NA	NA	3	2	0	0	0	0	0	0	1	0	0	0	0	0	0	0	0	0	0	0	0	0	0	0	0	0
SL405607	Smoldering Multiple Myeloma	-0.415053	0.0936767	No	Q1	0.0492197	0.353381	CD2	1	0	0	55	388	0	28	0	NA	NA	1	0	1	2	3	NA	NA	0	0	0	0	0	0	0	0	0	0	0	0	0	0	0	0	0	0	0	0	0	0	0	0
SL405608	Early Relapse Multiple Myeloma	0.0310417	-0.0299834	Yes	Q3	0.752078	0.419683	CD2	0	0	0	65	391	0	NA	NA	NA	NA	NA	NA	NA	NA	NA	3	2	1	0	0	0	1	0	0	0	0	0	0	0	0	0	0	0	0	0	0	0	0	0	0	0
SL405609	Early Relapse Multiple Myeloma	0.120204	-0.00136585	Yes	Q3	0.418306	0.063286	MS	0	0	0	69	188	0	NA	NA	NA	NA	NA	NA	NA	NA	NA	NA	NA	0	0	1	0	1	1	1	1	1	0	0	0	0	0	0	0	0	0	0	0	0	0	0	0
SL405629	Early Relapse Multiple Myeloma	0.214006	0.0472413	Yes	Q4	0.704626	-0.246485	LB	0	0	0	75	0	0	NA	NA	NA	NA	NA	NA	NA	NA	NA	3	2	0	0	0	0	0	0	1	0	0	0	0	0	0	0	0	0	0	0	0	0	0	0	0	0
SL405630	Early Relapse Multiple Myeloma	0.316238	-0.0464443	Yes	Q3	0.854767	0.0656437	CD2	0	0	0	71	396	0	NA	NA	NA	NA	NA	NA	NA	NA	NA	2	2	1	0	0	0	1	1	1	1	0	0	0	0	0	0	0	0	0	0	0	0	0	0	0	0
SL405631	Newly Diagnosed Multiple Myeloma	0.0486507	0.205121	Yes	Q4	0.634933	0.027519	LB	0	1	0	61	384	0	NA	NA	380	0	NA	NA	NA	NA	NA	3	3	0	1	0	0	1	0	1	1	0	0	0	0	0	0	0	0	0	1	0	0	0	0	0	0
SL405632	Late Relapse Multiple Myeloma	-0.219569	0.324083	No	Q1	0.449056	0.98412	MF	0	0	0	51	312	0	NA	NA	NA	NA	NA	NA	NA	NA	NA	3	2	0	0	0	0	0	0	0	0	0	0	0	0	0	0	0	0	0	0	0	0	0	0	0	0
SL405633	Late Relapse Multiple Myeloma	0.149894	0.0378516	Yes	Q4	0.521835	-0.262347	LB	0	0	0	73	172	1	NA	NA	NA	NA	NA	NA	NA	NA	NA	2	2	0	0	0	0	0	1	1	1	0	0	0	0	0	0	0	0	0	0	0	0	0	0	0	1
SL405634	Early Relapse Multiple Myeloma	0.324157	0.0736595	Yes	Q4	0.699997	-0.133785	PR	0	1	0	66	283	0	NA	NA	NA	NA	NA	NA	NA	NA	NA	1	1	0	0	0	0	0	0	1	0	0	0	0	0	0	0	0	0	0	0	0	0	0	0	0	0
SL405635	Late Relapse Multiple Myeloma	-0.0092994	0.217472	No	Q1	0.306497	0.467101	PR	0	0	0	71	86	1	NA	NA	NA	NA	NA	NA	NA	NA	NA	2	2	0	0	0	0	1	1	1	1	1	0	0	1	0	0	0	0	0	0	0	0	0	0	0	0
SL405724	Early Relapse Multiple Myeloma	0.0216095	-0.0899934	Yes	Q3	0.146521	-0.293496	HY	0	NA	1	56	404	0	NA	NA	NA	NA	NA	NA	NA	NA	NA	NA	NA	0	0	0	0	0	0	1	0	0	0	0	0	0	0	0	0	0	0	0	0	0	0	0	0
SL405725	Newly Diagnosed Multiple Myeloma	0.1075	0.0347078	Yes	Q4	0.435961	-0.0933699	HY	1	0	0	61	206	0	NA	NA	216	0	NA	NA	NA	NA	NA	1	1	0	0	0	0	1	0	1	0	0	0	0	0	0	0	0	0	0	0	0	0	0	0	0	0
SL405726	Early Relapse Multiple Myeloma	0.0996812	0.0833083	Yes	Q4	0.543696	-0.0809346	CD2	0	1	0	60	165	0	NA	NA	NA	NA	NA	NA	NA	NA	NA	3	3	0	0	0	0	1	1	0	1	0	0	0	0	0	0	0	0	0	0	0	0	0	0	0	1
SL405727	Early Relapse Multiple Myeloma	-0.456824	0.158009	No	Q1	-0.316807	0.640258	MF	1	0	0	55	364	0	NA	NA	NA	NA	NA	NA	NA	NA	NA	NA	NA	NA	NA	NA	NA	NA	NA	NA	NA	NA	0	0	0	0	0	0	0	0	0	0	0	0	0	0	0
SL405728	Newly Diagnosed Multiple Myeloma	-0.0312481	-0.0401	No	Q2	0.4217	0.0555568	MS	0	0	0	76	305	1	NA	NA	192	1	NA	NA	NA	NA	NA	1	NA	NA	NA	NA	NA	NA	NA	NA	NA	NA	0	0	0	0	0	0	0	0	0	0	0	0	0	0	0
SL405729	Early Relapse Multiple Myeloma	-0.0428889	-0.0292487	No	Q2	0.0438789	-0.255871	HY	0	0	0	67	41	1	NA	NA	NA	NA	NA	NA	NA	NA	NA	3	2	0	0	0	0	0	0	0	0	0	0	0	0	0	0	0	0	0	0	0	0	0	0	0	0
SL405730	Smoldering Multiple Myeloma	-0.0421794	-0.0654505	No	Q2	0.601943	0.182	CD2	0	0	0	71	315	0	701	0	NA	NA	0	0	1	2	2	NA	NA	0	0	0	0	1	0	0	0	0	0	0	0	0	0	0	0	0	0	0	0	0	0	0	0
SL405731	Newly Diagnosed Multiple Myeloma	-0.16053	-0.146312	No	Q2	-0.00724786	-0.129429	LB	0	0	0	67	278	0	NA	NA	278	0	NA	NA	NA	NA	NA	1	1	0	0	0	0	1	0	0	0	0	0	0	0	0	0	0	0	0	0	0	0	0	0	0	0
[truncated: 62 more columns]
