# Supplementary material for: Epigenetic Plasticity Drives Carcinogenesis and Multi-Therapy Resistance in Multiple Myeloma
Source: Research Square preprint supplement (doi:10.21203/rs.3.rs-6306816/v1), 2025-04-15
Supplement: Supplementary file 6 [file 22cd6f64820ac18a85aa45f3.xlsx]

## Sheet: Sheet1
	Number of mutations					dNdS				p-value					q-value
GENE	synonymous	missense	nonsense	splicing site	indel	missense	nonsense	splicing site	indel	missense	nonsense	all substitutions	indel	global	missense	nonsense	all substitutions	global
TP53	2	66	8	2	10	21.296	31.8127	31.8127	45.3761	0	5.66e-09	0	1.8e-07	0	0	2.77e-05	0	0
FUS	85	4	0	0	2	0.0383686	0	0	6.77204	0	3e-07	0	0.0552998	0	0	0.000612787	0	0
CNTNAP3	80	16	0	0	1	0.120771	0	0	1.38698	0	5.64e-07	0	0.396223	0	0	0.000919049	0	0
SRGAP2	66	2	0	1	1	0.0192132	0.0990826	0.0990826	1.66774	0	0.000418946	0	0.356033	0	0	0.115428	0	0
KRAS	2	224	0	0	0	142.244	0	0	0	0	0.555068	0	1	0	0	0.844959	0	0
NRAS	1	169	0	0	0	155.248	0	0	0	0	0.621874	0	1	0	0	0.844959	0	0
DEK	1	76	0	0	1	42.1677	0	0	4.75484	0	0.505958	0	0.169134	0	0	0.844959	0	0
NDUFS3	0	51	0	0	0	59.7571	0	0	0	0	0.693234	0	1	0	0	0.844959	0	0
PTH2	1	103	0	0	2	108.09	0	0	35.4023	0	0.797129	0	0.00326648	0	0	0.845332	0	0
DIS3	2	82	2	1	2	17.0077	4.92115	4.92115	3.7285	7.22e-15	0.0616794	2.3e-14	0.124162	9.84e-14	1.41e-11	0.844959	3.61e-11	1.28e-10
BRAF	3	80	0	0	0	13.8572	0	0	0	8.44e-15	0.224435	1.11e-16	1	4.22e-15	1.5e-11	0.844959	2.17e-13	6.88e-12
RRP12	45	5	0	0	1	0.0688677	0	0	1.37736	1.3e-14	0.000159208	5.11e-15	0.397764	7.07e-14	2.12e-11	0.0611087	9.08e-12	9.88e-11
RBMXL1	1	56	0	0	2	24.3606	0	0	9.14485	3.21e-14	0.538567	2.4e-14	0.0349102	2.99e-14	4.83e-11	0.844959	3.61e-11	4.49e-11
UBB	67	1	0	0	1	0.0240601	0	0	7.77312	6e-14	0.0513603	1.72e-13	0.111918	6.29e-13	8.25e-11	0.844959	2.25e-10	7.23e-10
KRTAP9-2	2	34	0	0	0	22.1552	0	0	0	6.33e-14	0.638128	2.48e-13	1	7.45e-12	8.25e-11	0.844959	3.03e-10	6.94e-09
UBC	44	3	0	0	0	0.0555533	0	0	0	5.02e-13	0.0241569	1.32e-12	1	3.75e-11	6.14e-10	0.844959	1.52e-09	3.34e-08
CST2	0	25	0	0	1	52.5545	0	0	12.5903	7.54e-13	0.727157	2.49e-12	0.0727	5.49e-12	8.68e-10	0.844959	2.71e-09	5.37e-09
RANBP2	41	15	2	0	1	0.144124	0.183071	0.183071	0.554362	2.27e-12	0.00209608	1e-11	0.600321	1.62e-10	2.47e-09	0.328028	9.81e-09	1.32e-07
IGLL5	67	116	1	4	3	2.82953	1.51233	1.51233	24.8308	3.07e-12	0.399788	2.66e-11	0.00165941	1.4e-12	3.16e-09	0.844959	2.39e-08	1.52e-09
SKIDA1	35	3	0	0	6	0.0572354	0	0	11.8008	8.16e-12	0.0373476	2.69e-11	0.00250732	2.12e-12	7.98e-09	0.844959	2.39e-08	2.18e-09
LAPTM4B	0	35	0	0	0	35.2753	0	0	0	3.97e-11	0.692627	8.5e-11	1	2.06e-09	3.7e-08	0.844959	7.23e-08	1.55e-06
RRM2	1	41	0	0	1	19.1718	0	0	3.97293	8.35e-11	0.536766	9.53e-11	0.19499	4.78e-10	7.42e-08	0.844959	7.77e-08	3.74e-07
KRT6B	44	5	0	0	0	0.0986469	0	0	0	1.02e-10	0.00900389	1.38e-10	1	3.26e-09	8.71e-08	0.733892	1.08e-07	2.36e-06
HIST1H1E	2	33	0	0	0	14.4102	0	0	0	4.86e-10	0.781839	3e-09	1	6.19e-08	3.96e-07	0.844959	2.03e-06	3.37e-05
LRRCC1	1	53	0	1	0	15.6824	2.28712	2.28712	0	9.97e-10	0.520812	1.27e-09	1	2.72e-08	7.8e-07	0.844959	8.86e-07	1.62e-05
TENT5C	2	37	4	0	40	13.1808	28.8921	28.8921	182.43	1.08e-09	7.2e-05	6.15e-10	5.97e-27	0	8.1e-07	0.0370854	4.63e-07	0
FOXD4L3	0	33	0	0	1	28.2212	0	0	4.27708	2.56e-09	0.771268	1.03e-08	0.184043	4e-08	1.85e-06	0.844959	6.5e-06	2.23e-05
TVP23C-CDRT4	5	26	0	0	0	9.40988	0	0	0	5.71e-09	0.358383	9.14e-09	1	1.78e-07	3.99e-06	0.844959	5.96e-06	9.18e-05
OR1L4	43	2	0	0	0	0.0649996	0	0	0	6.18e-09	0.124605	2.23e-08	1	4.15e-07	4.17e-06	0.844959	1.32e-05	0.000193493
IRF4	2	35	0	0	1	11.4829	0	0	3.95535	1.69e-08	0.449753	2.01e-08	0.195662	7.99e-08	1.1e-05	0.844959	1.23e-05	4.23e-05
MAML2	25	4	0	0	6	0.0952216	0	0	9.27131	3.62e-08	0.00463442	4.03e-08	0.00580396	5.42e-09	2.29e-05	0.522254	2.32e-05	3.66e-06
HCAR3	3	33	0	0	0	9.02937	0	0	0	7.02e-08	0.581436	2.35e-07	1	3.82e-06	4.29e-05	0.844959	0.000115007	0.00149629
SLC35G5	1	25	0	0	0	15.1074	0	0	0	8.99e-08	0.703542	3.67e-07	1	5.81e-06	5.33e-05	0.844959	0.000175118	0.00218403
PSMD11	2	31	1	0	0	10.5918	2.42149	2.42149	0	1.16e-07	0.478841	4.99e-07	1	7.74e-06	6.65e-05	0.844959	0.000227034	0.00275311
KRT6A	3	38	0	0	0	8.20906	0	0	0	1.58e-07	0.427601	2.28e-07	1	3.71e-06	8.82e-05	0.844959	0.000114257	0.00148184
ANKRD62	2	44	0	0	1	8.96578	0	0	1.94751	3.29e-07	0.294943	7.24e-08	0.323447	4.35e-07	0.000178883	0.844959	3.83e-05	0.000197862
MAX	0	15	3	7	3	25.7023	119.391	119.391	33.3134	7e-07	1.26e-11	4.26e-12	0.000760713	1.11e-13	0.000366192	1.23e-07	4.39e-09	1.36e-10
TNXB	44	27	2	1	5	0.306924	0.569173	0.569173	1.99	7.11e-07	0.304077	4.57e-06	0.189983	1.3e-05	0.000366192	0.844959	0.00186335	0.00416626
AGAP2	5	51	1	0	0	5.56784	1.51299	1.51299	0	7.74e-07	0.715013	2.87e-06	1	3.95e-05	0.000388422	0.844959	0.00122198	0.0104522
SRRM2	27	16	4	0	1	0.230129	0.727271	0.727271	0.649407	1.56e-06	0.535269	6.77e-06	0.566354	5.16e-05	0.000761338	0.844959	0.00259575	0.0132904
MYEOV	1	21	1	0	2	12.0294	9.13588	9.13588	11.3874	3.36e-06	0.127395	1.9e-05	0.0244874	7.23e-06	0.00160352	0.844959	0.0059817	0.00262067
AL445989.1	0	11	0	0	0	25.2026	0	0	0	4.61e-06	0.824459	2.28e-05	1	0.000266017	0.00214877	0.854965	0.00684805	0.0489895
CEACAM6	0	17	0	0	0	19.5904	0	0	0	5.23e-06	0.702718	1.58e-05	1	0.000190325	0.00233143	0.844959	0.00523408	0.0391909
PILRA	0	16	1	0	0	20.1132	11.296	11.296	0	5.24e-06	0.117097	3.06e-05	1	0.000348573	0.00233143	0.844959	0.00808662	0.0592937
NPIPB15	1	24	0	0	1	10.6364	0	0	4.02662	7.77e-06	0.541984	1.46e-05	0.192963	3.87e-05	0.00337867	0.844959	0.00499529	0.0103735
TVP23C	5	27	0	0	0	5.66149	0	0	0	8.22e-06	0.346244	1.22e-05	1	0.000149947	0.00349482	0.844959	0.00425293	0.0321499
ANKHD1	0	36	0	1	2	15.0897	4.33615	4.33615	1.40607	8.42e-06	0.313461	2.89e-05	0.32814	0.000119119	0.00350322	0.844959	0.00800162	0.0274143
ANKHD1-EIF4EBP3	0	36	0	1	2	15.0305	4.24539	4.24539	1.36579	8.79e-06	0.319916	2.93e-05	0.335511	0.000123363	0.00358226	0.844959	0.00800162	0.0277381
RPL10	0	15	0	0	0	19.3121	0	0	0	9.81e-06	0.69756	2.95e-05	1	0.000336705	0.0039172	0.844959	0.00800162	0.0577774
RTL1	1	31	1	0	1	9.48448	4.85497	4.85497	1.31554	1.29e-05	0.249726	7.19e-05	0.407974	0.000335397	0.0050591	0.844959	0.0163504	0.0577774
OR10A5	37	5	0	0	0	0.183656	0	0	0	1.38e-05	0.116477	3.47e-05	1	0.000391501	0.00528853	0.844959	0.00906274	0.0654576
FBL	19	1	0	0	0	0.0567428	0	0	0	1.47e-05	0.0461688	2.68e-05	1	0.000309118	0.00552356	0.844959	0.0078301	0.0544771
OR5D3P	22	1	0	0	0	0.0606746	0	0	0	1.88e-05	0.189769	6.24e-05	1	0.000666706	0.00691647	0.844959	0.0147106	0.102694
ZNF347	17	3	0	0	1	0.114606	0	0	2.12582	1.91e-05	0.023228	2.99e-05	0.305652	0.000115123	0.00691647	0.844959	0.00800816	0.0271317
PCGF6	18	1	1	0	1	0.0585367	0.513573	0.513573	5.0935	2.26e-05	0.471581	0.000125857	0.159953	0.000237815	0.00804607	0.844959	0.0256461	0.0460607
CDRT15L2	31	4	3	0	0	0.167277	1.86555	1.86555	0	3.01e-05	0.34256	5.12e-05	1	0.000557374	0.0105217	0.844959	0.0123732	0.0879302
KRTAP9-4	0	10	0	0	0	20.622	0	0	0	3.25e-05	0.783989	0.000136555	1	0.00135172	0.0111475	0.844959	0.027258	0.17988
ARHGAP5	0	30	1	0	0	13.6848	5.37096	5.37096	0	3.33e-05	0.253998	0.000151146	1	0.00148082	0.0112199	0.844959	0.0292744	0.188102
OR2M5	2	19	0	0	0	7.92044	0	0	0	3.48e-05	0.641409	0.000122536	1	0.00122623	0.0114197	0.844959	0.0252321	0.167745
IRX4	2	25	1	0	3	7.2244	6.6093	6.6093	9.82318	3.55e-05	0.170931	0.00017909	0.0155572	3.84e-05	0.0114197	0.844959	0.0336861	0.0103735
PRKD2	3	32	0	0	1	5.82786	0	0	2.01104	3.56e-05	0.361783	3.88e-05	0.316871	0.000151201	0.0114197	0.844959	0.00985006	0.0321499
LRCOL1	21	0	0	0	2	0	0	0	22.3477	4.16e-05	0.139332	0.000106053	0.00761348	1.21e-05	0.0129682	0.844959	0.0226883	0.00395648
SFSWAP	8	0	0	0	1	0	0	0	1.7807	4.18e-05	0.138347	0.000143814	0.342106	0.000537243	0.0129682	0.844959	0.0284171	0.0854435
CDHR5	5	36	0	0	3	4.57268	0	0	6.33978	4.69e-05	0.306243	5.02e-05	0.0380914	2.71e-05	0.0143383	0.844959	0.012265	0.00745827
NCOA6	26	16	1	0	4	0.296567	0.206182	0.206182	3.46476	8.07e-05	0.0439548	0.000230534	0.0904929	0.000245701	0.0242806	0.844959	0.041289	0.0466641
ACIN1	26	16	0	0	4	0.302563	0	0	5.32882	0.000105353	0.00126244	2.75e-05	0.0403398	1.63e-05	0.0312261	0.23746	0.00786679	0.00514929
HIST1H2AI	0	10	0	0	0	17.0019	0	0	0	0.000118798	0.853095	0.000542557	1	0.00462216	0.0346856	0.871846	0.0822751	0.401861
RSBN1L	21	7	0	0	0	0.220157	0	0	0	0.000127432	0.024037	0.000156688	1	0.00152947	0.0366591	0.844959	0.0297586	0.19057
FTH1	0	10	0	0	0	16.4214	0	0	0	0.000148631	0.727094	0.00050275	1	0.00432135	0.042138	0.844959	0.0781686	0.393182
HOXC13	10	0	0	0	0	0	0	0	0	0.000157778	0.362316	0.000637164	1	0.00532572	0.0440921	0.844959	0.0912637	0.434091
ZSCAN2	8	0	0	0	0	0	0	0	0	0.000162012	0.205985	0.000559696	1	0.00475076	0.0446377	0.844959	0.0835784	0.407607
ZNF626	0	16	1	0	0	13.0748	9.04528	9.04528	0	0.000187917	0.148401	0.000918629	1	0.00734226	0.0510559	0.844959	0.118225	0.509324
OPTN	0	16	0	0	0	12.8474	0	0	0	0.0002139	0.592662	0.00035812	1	0.00319967	0.0573194	0.844959	0.0598348	0.32657
TRAF3	1	19	16	0	18	7.9712	69.7247	69.7247	56.5566	0.000239373	4.33e-15	4.31e-14	1.54e-10	0	0.0624349	8.47e-11	6.02e-11	0
CRYBG3	0	29	0	0	0	11.0628	0	0	0	0.000238187	0.515584	0.000187223	1	0.00179419	0.0624349	0.844959	0.0347929	0.216655
ATG9B	6	37	0	0	6	3.73077	0	0	11.5967	0.000246822	0.252424	0.000211445	0.00267166	8.69e-06	0.0635306	0.844959	0.038299	0.00303632
OR2L3	11	0	0	0	0	0	0	0	0	0.000252728	0.30512	0.000911008	1	0.00728894	0.064206	0.844959	0.118225	0.508602
PRSS37	0	10	0	0	0	14.7655	0	0	0	0.000289652	0.699717	0.000876104	1	0.0070439	0.0726431	0.844959	0.116803	0.500058
ZNF90	1	20	0	0	0	7.65152	0	0	0	0.000298838	0.528364	0.000555114	1	0.00471643	0.0739983	0.844959	0.0835318	0.406444
FNBP4	15	5	1	0	1	0.189074	0.308554	0.308554	1.75621	0.000322411	0.172654	0.00137099	0.345031	0.00409475	0.0788375	0.844959	0.152135	0.376063
GLYATL1	0	12	0	0	0	13.282	0	0	0	0.000340696	0.600366	0.000648327	1	0.00540777	0.0822803	0.844959	0.0912637	0.43543
FFAR2	0	12	1	0	0	13.1953	22.0384	22.0384	0	0.000355477	0.0565187	0.00103822	1	0.00817106	0.084803	0.844959	0.129361	0.549955
GSX1	15	1	0	0	0	0.0801567	0	0	0	0.000404374	0.324266	0.00143221	1	0.0108111	0.0953056	0.844959	0.15479	0.630582
AMMECR1	4	20	0	0	1	4.73473	0	0	5.35275	0.000411977	0.40181	0.000746745	0.153572	0.00115521	0.0959415	0.844959	0.101443	0.161415
PTPN11	3	24	0	0	0	4.89661	0	0	0	0.000462734	0.292194	0.00036093	1	0.00322196	0.104423	0.844959	0.0598348	0.32657
IDH1	0	13	0	0	0	12.2982	0	0	0	0.000463462	0.644827	0.00106865	1	0.00837968	0.104423	0.844959	0.131126	0.554706
ZNF248	7	0	0	0	0	0	0	0	0	0.000464409	0.178576	0.00141064	1	0.0106697	0.104423	0.844959	0.15479	0.628674
HLA-B	14	39	4	0	1	2.71488	3.48335	3.48335	4.92512	0.000489596	0.0510422	0.00121179	0.164389	0.00189667	0.108835	0.844959	0.141694	0.223509
TBC1D26	1	12	0	0	1	8.47351	0	0	7.12278	0.000503534	0.551463	0.00114142	0.120712	0.00136265	0.110676	0.844959	0.135323	0.180109
RLIM	21	8	0	0	1	0.26384	0	0	2.86051	0.000510157	0.0165577	0.000430749	0.249285	0.00108873	0.110886	0.844959	0.0687791	0.154332
FOXD4	0	14	0	0	0	11.7237	0	0	0	0.000539811	0.760155	0.00184137	1	0.0134369	0.114819	0.844959	0.18101	0.720146
ATCAY	0	12	0	0	0	12.3447	0	0	0	0.000543492	0.674566	0.00143099	1	0.0108031	0.114819	0.844959	0.15479	0.630582
ATN1	10	2	0	1	7	0.112646	0.882294	0.882294	10.5077	0.000545862	0.902856	0.00214074	0.00291105	8.09e-05	0.114819	0.913456	0.194408	0.0197883
ZNF28	3	27	1	0	2	4.64853	1.99917	1.99917	4.97307	0.000587588	0.563677	0.00242575	0.0856323	0.00196907	0.121351	0.844959	0.209042	0.229279
SAA2	0	7	0	0	0	15.9063	0	0	0	0.000589323	0.770698	0.00217644	1	0.0155181	0.121351	0.844959	0.194408	0.764649
EMILIN2	0	17	1	0	0	10.8702	9.20052	9.20052	0	0.000620437	0.145752	0.00275	1	0.0189644	0.126427	0.844959	0.226032	0.83952
SEC24B	12	4	0	0	0	0.172505	0	0	0	0.000634906	0.0281623	0.000877726	1	0.00705531	0.127938	0.844959	0.116803	0.500058
ANKFY1	10	2	0	0	0	0.11564	0	0	0	0.000646731	0.0856338	0.0014627	1	0.0110104	0.127938	0.844959	0.155985	0.637237
OR2A7	0	10	0	0	0	12.9063	0	0	0	0.000647471	0.78001	0.00235687	1	0.0166169	0.127938	0.844959	0.204911	0.796716
EXOC3L2	0	17	0	0	0	10.7606	0	0	0	0.000664741	0.684124	0.00172021	1	0.0126699	0.129643	0.844959	0.172568	0.698163
AKR1C8P	1	13	0	0	0	7.85578	0	0	0	0.000679479	0.545297	0.00146943	1	0.0110543	0.129643	0.844959	0.155985	0.637558
MYD88	1	14	0	0	0	7.64297	0	0	0	0.000684159	0.563735	0.00156209	1	0.0116559	0.129643	0.844959	0.16254	0.658995
NPEPPS	5	0	0	0	1	0	0	0	1.94328	0.000693198	0.148801	0.00206926	0.323895	0.00556815	0.129643	0.844959	0.190938	0.439211
BCL7A	3	15	0	2	1	5.37724	5.98438	5.98438	7.70611	0.000694458	0.0707802	0.00205269	0.112764	0.00216912	0.129643	0.844959	0.1907	0.248541
HMGN1	0	7	0	0	0	15.3862	0	0	0	0.000695864	0.724758	0.00229561	1	0.0162455	0.129643	0.844959	0.201375	0.786618
ALDH8A1	0	13	0	0	1	11.5045	0	0	3.66356	0.000710118	0.690643	0.00194512	0.207552	0.00355866	0.13105	0.844959	0.184653	0.344626
TEDC2	7	0	0	0	0	0	0	0	0	0.00073547	0.207181	0.00223861	1	0.0158984	0.13446	0.844959	0.198152	0.779459
RPL5	0	11	0	0	0	12.1151	0	0	0	0.000745275	0.636197	0.00169867	1	0.0125326	0.134466	0.844959	0.171286	0.694514
ENGASE	9	1	0	1	0	0.0752972	0.84155	0.84155	0	0.000749248	0.866201	0.00299704	1	0.0204103	0.134466	0.881844	0.235455	0.874662
KIR3DL3	0	12	0	0	0	11.6247	0	0	0	0.000787616	0.690366	0.00217149	1	0.0154878	0.140067	0.844959	0.194408	0.764649
PRB2	17	44	0	0	6	2.44171	0	0	25.724	0.000795391	0.0459209	0.000106703	9.81e-05	2.03e-07	0.140175	0.844959	0.0226883	0.000101717
ANKRD50	1	26	0	0	1	6.39791	0	0	1.25022	0.000806621	0.415231	0.000740896	0.41936	0.00282015	0.140885	0.844959	0.101353	0.298846
ZFP36L1	1	14	0	6	0	7.39565	75.8426	75.8426	0	0.000859035	3.08e-08	6.25e-08	1	1.1e-06	0.144785	0.000120476	3.43e-05	0.000478204
CRBN	0	13	4	3	2	11.0983	43.5928	43.5928	7.28235	0.000888158	1.93e-06	5.61e-06	0.0496234	4.48e-06	0.144785	0.00235451	0.00219671	0.00171992
AHNAK	55	72	0	0	2	0.546789	0	0	0.606966	0.000886482	0.00178426	0.000128849	0.544068	0.00074067	0.144785	0.298321	0.0259849	0.113195
NOP10	0	5	0	0	0	19.0351	0	0	0	0.000839157	0.79012	0.00322801	1	0.0217435	0.144785	0.844959	0.246666	0.904529
FMN2	34	24	6	0	3	0.417332	1.38486	1.38486	3.11286	0.000843889	0.478281	0.00100635	0.123398	0.00124103	0.144785	0.844959	0.126193	0.168591
TUBB8	3	20	0	0	0	4.7821	0	0	0	0.000862058	0.494153	0.00194676	1	0.0140976	0.144785	0.844959	0.184653	0.731505
XKR5	0	14	0	0	1	10.8924	0	0	2.60236	0.000866701	0.635209	0.00187314	0.266539	0.00429486	0.144785	0.844959	0.1823	0.392599
DDX24	15	5	0	0	1	0.213158	0	0	2.07886	0.000881156	0.0495544	0.00136557	0.310144	0.00371298	0.144785	0.844959	0.152135	0.354141
KRTAP1-5	0	8	1	0	0	13.4338	26.842	26.842	0	0.000936048	0.0454704	0.00193274	1	0.0140101	0.150341	0.844959	0.184653	0.730021
NPS	0	5	0	0	0	18.5277	0	0	0	0.000937617	0.813328	0.00370404	1	0.0244405	0.150341	0.850045	0.273428	0.947816
HSD17B11	9	0	0	0	0	0	0	0	0	0.000945913	0.221503	0.00272077	1	0.0187919	0.150439	0.844959	0.225006	0.837584
MCOLN1	1	16	0	0	0	6.95743	0	0	0	0.000986571	0.523818	0.00186528	1	0.0135873	0.15564	0.844959	0.1823	0.724547
CCDC155	6	0	0	0	1	0	0	0	3.17552	0.00104828	0.160589	0.00288305	0.231051	0.00553823	0.163705	0.844959	0.232092	0.439144
GTF3C3	11	3	0	0	2	0.158059	0	0	4.03116	0.00105443	0.0393439	0.00157756	0.112682	0.00171275	0.163705	0.844959	0.163281	0.208104
TEX13C	2	23	0	0	0	5.13044	0	0	0	0.00108083	0.546462	0.00253126	1	0.0176658	0.166482	0.844959	0.21623	0.823961
NUDT10	11	0	0	0	0	0	0	0	0	0.00112827	0.32581	0.00364018	1	0.0240824	0.172432	0.844959	0.272252	0.947816
HR	1	21	2	0	0	6.35528	6.94494	6.94494	0	0.00117068	0.0685478	0.00426613	1	0.0275466	0.177526	0.844959	0.29699	0.999753
FLG	35	45	4	0	1	0.477439	0.496475	0.496475	0.440132	0.00123709	0.144715	0.00488781	0.647566	0.0213825	0.18614	0.844959	0.315562	0.899537
TXNDC8	0	6	0	0	0	15.0478	0	0	0	0.00124652	0.727084	0.00408008	1	0.0265272	0.18614	0.844959	0.290959	0.975424
SULF2	15	5	1	0	0	0.223515	0.472536	0.472536	0	0.00128717	0.415386	0.0055637	1	0.0344476	0.190755	0.844959	0.340157	1
IGFN1	10	64	0	1	1	2.56065	0.52738	0.52738	0.482022	0.00133244	0.502636	0.00127348	0.629313	0.00651485	0.194814	0.844959	0.143999	0.484806
DYNLRB1	0	7	1	0	0	13.4598	16.2542	16.2542	0	0.00133448	0.078931	0.00368363	1	0.0243262	0.194814	0.844959	0.272952	0.947816
PSD3	2	24	1	3	0	4.94361	8.11144	8.11144	0	0.0013612	0.00783257	0.00205694	1	0.0147822	0.197243	0.700747	0.1907	0.749146
ZNF808	1	22	0	0	0	6.15027	0	0	0	0.00139128	0.454758	0.00175346	1	0.0128812	0.199292	0.844959	0.175006	0.703342
LUZP4	0	10	0	0	0	11.2423	0	0	0	0.00140805	0.652324	0.00342356	1	0.0228594	0.199292	0.844959	0.258904	0.918224
GALP	1	7	0	0	0	9.39078	0	0	0	0.00141609	0.643437	0.00434906	1	0.0279983	0.199292	0.844959	0.297804	1
RANBP3L	6	0	1	0	0	0	0.812848	0.812848	0	0.00140837	0.842197	0.0055265	1	0.0342544	0.199292	0.865196	0.339967	1
OR6C70	0	9	0	0	0	11.6935	0	0	0	0.0014382	0.769022	0.00492455	1	0.0310913	0.199701	0.844959	0.316888	1
PDHA2	1	14	1	0	0	6.84754	7.62059	7.62059	0	0.0014401	0.155027	0.00523312	1	0.0327214	0.199701	0.844959	0.33212	1
TNP2	0	7	0	0	0	13.2271	0	0	0	0.00144962	0.80562	0.00539407	1	0.0335643	0.199701	0.847333	0.338201	1
GMPPA	6	0	0	0	0	0	0	0	0	0.00147782	0.225171	0.00441228	1	0.0283417	0.200942	0.844959	0.297804	1
FANCD2	4	32	4	0	0	3.70777	3.26521	3.26521	0	0.00147917	0.0916436	0.00601484	1	0.0367719	0.200942	0.844959	0.359823	1
SLC35G6	39	12	0	0	0	0.379135	0	0	0	0.00150659	0.0787087	0.00209728	1	0.0150314	0.203255	0.844959	0.191715	0.756201
ZNF841	7	1	0	0	1	0.0782979	0	0	1.93278	0.00155653	0.146425	0.00415546	0.325012	0.0102741	0.208554	0.844959	0.291236	0.618113
TYRP1	0	13	0	1	1	10.0367	8.24036	8.24036	3.32308	0.00162232	0.163713	0.00664075	0.2234	0.0111464	0.214661	0.844959	0.378093	0.637558
HNRNPA0	15	2	0	0	1	0.150961	0	0	5.84254	0.00162406	0.293351	0.00494581	0.142812	0.00583097	0.214661	0.844959	0.317083	0.450852
FAM98B	26	9	2	0	4	0.325993	0.600764	0.600764	16.4776	0.00170949	0.453838	0.00724431	0.00214356	0.000187474	0.22294	0.844959	0.393237	0.0391909
HIST1H2BF	0	7	0	0	0	12.774	0	0	0	0.00170785	0.85555	0.00672621	1	0.040369	0.22294	0.873501	0.378093	1
ABCE1	5	0	0	0	0	0	0	0	0	0.00172119	0.152239	0.00455398	1	0.0291079	0.222979	0.844959	0.302237	1
CAAP1	1	13	0	0	3	6.8006	0	0	14.8162	0.00175055	0.576431	0.00410513	0.00606208	0.000288704	0.224465	0.844959	0.290959	0.051813
CDH12	1	18	0	0	0	6.21189	0	0	0	0.00176	0.481719	0.00267757	1	0.0185364	0.224465	0.844959	0.22384	0.83733
NMRK2	2	12	0	0	0	5.78731	0	0	0	0.00176708	0.524343	0.00413506	1	0.0268293	0.224465	0.844959	0.291236	0.981
ZNF729	5	36	1	0	2	3.30716	1.03829	1.03829	2.85366	0.00185878	0.972344	0.00480785	0.169463	0.0066098	0.23459	0.975436	0.311638	0.48506
ZNF2	12	2	0	0	0	0.145653	0	0	0	0.00189003	0.115677	0.00392722	1	0.0256833	0.237005	0.844959	0.284535	0.969918
ATXN1L	8	1	0	0	0	0.085841	0	0	0	0.0019136	0.21909	0.00556437	1	0.0344511	0.237551	0.844959	0.340157	1
OR2G6	0	9	1	0	0	11.0602	27.2221	27.2221	0	0.00191867	0.0447694	0.00364482	1	0.0241085	0.237551	0.844959	0.272252	0.947816
SAMHD1	1	17	3	1	6	6.20682	10.1888	10.1888	17.1083	0.00194131	0.00569332	0.00247198	0.00058825	2.1e-05	0.238286	0.589273	0.212092	0.00613121
NDOR1	5	0	0	0	0	0	0	0	0	0.00196115	0.26491	0.006197	1	0.0377006	0.238286	0.844959	0.366241	1
OR2G2	0	9	0	0	0	11.0195	0	0	0	0.00195514	0.797023	0.00693296	1	0.0414	0.238286	0.845332	0.383533	1
SMAD7	6	0	0	0	2	0	0	0	8.37386	0.00197743	0.335744	0.00657183	0.0400811	0.00243435	0.238735	0.844959	0.378093	0.272119
IGKV1-33	2	7	0	0	0	7.42015	0	0	0	0.00198926	0.675027	0.00673675	1	0.0404217	0.238735	0.844959	0.378093	1
WIPI1	0	11	1	0	0	10.1241	7.19075	7.19075	0	0.00206628	0.188705	0.00844827	1	0.0487786	0.246466	0.844959	0.428273	1
RBMX	3	20	0	0	5	4.28018	0	0	22.8038	0.00212141	0.322431	0.0022226	0.000337736	1.13e-05	0.250045	0.844959	0.197629	0.00382356
EMX2	0	9	0	0	0	10.8436	0	0	0	0.00212184	0.736833	0.00660411	1	0.0397572	0.250045	0.844959	0.378093	1
ZNF343	16	5	0	0	0	0.24336	0	0	0	0.00215911	0.0234389	0.00188494	1	0.0137108	0.252913	0.844959	0.18254	0.728832
CHL1	1	21	4	0	1	5.81683	9.14158	9.14158	1.45944	0.0022136	0.00817044	0.00364636	0.384989	0.0106248	0.257752	0.719956	0.272252	0.628674
OR6K6	1	11	0	0	0	6.92147	0	0	0	0.00223508	0.695119	0.00709729	1	0.042215	0.258714	0.844959	0.3889	1
ATF5	1	11	1	0	0	6.88824	10.7003	10.7003	0	0.0022987	0.107203	0.0063058	1	0.0382528	0.26354	0.844959	0.369323	1
TRIM8	9	1	0	0	0	0.0925618	0	0	0	0.00230372	0.218382	0.00637688	1	0.0386125	0.26354	0.844959	0.372372	1
KRTAP1-1	6	15	0	0	1	3.76218	0	0	10.0439	0.00234587	0.478558	0.00590282	0.089225	0.00450254	0.266801	0.844959	0.356392	0.400358
DISC1	0	14	3	0	1	9.19362	20.7094	20.7094	2.09102	0.00239712	0.00376085	0.00215892	0.308969	0.00554487	0.269497	0.465631	0.194408	0.439144
MRGPRX2	7	0	0	0	1	0	0	0	5.40126	0.00238534	0.431278	0.00831364	0.152434	0.00972118	0.269497	0.844959	0.42806	0.598005
DDX3X	1	19	2	1	2	5.85114	8.60741	8.60741	4.87144	0.00243992	0.0198256	0.00525289	0.0880501	0.00401411	0.272741	0.844959	0.33212	0.370396
SLC22A17	5	0	3	0	0	0	5.80596	5.80596	0	0.00246928	0.0292522	0.000146302	1	0.00143812	0.274455	0.844959	0.0286196	0.186308
PTPN21	3	25	2	0	3	4.00087	3.30729	3.30729	4.56464	0.00249533	0.203726	0.0100982	0.0685534	0.00572885	0.27467	0.844959	0.473717	0.447096
TMEM205	0	7	0	0	0	11.76	0	0	0	0.00249929	0.702234	0.00726394	1	0.0430376	0.27467	0.844959	0.393237	1
PCDHGB2	14	5	0	0	1	0.239208	0	0	1.91826	0.00252118	0.153697	0.00584731	0.326569	0.013865	0.275149	0.844959	0.354133	0.72899
B4GALNT1	5	0	0	0	1	0	0	0	3.34797	0.00253912	0.350754	0.00851344	0.22216	0.013751	0.275149	0.844959	0.429227	0.728987
CCL27	0	5	0	0	0	14.3715	0	0	0	0.00257725	0.782389	0.00905566	1	0.0516568	0.275149	0.844959	0.448473	1
ATG9A	4	0	0	0	0	0	0	0	0	0.0025783	0.280154	0.00831831	1	0.0481572	0.275149	0.844959	0.42806	1
CNTNAP3B	8	2	0	0	0	0.134384	0	0	0	0.00259621	0.0967051	0.00549203	1	0.034075	0.275149	0.844959	0.338912	1
FANCC	5	0	0	0	0	0	0	0	0	0.00260153	0.171517	0.00676477	1	0.0405618	0.275149	0.844959	0.378093	1
MARCHF9	6	0	0	0	0	0	0	0	0	0.00260212	0.343998	0.00845075	1	0.0487904	0.275149	0.844959	0.428273	1
EIF2AK4	0	17	1	1	1	8.65253	8.35057	8.35057	1.08353	0.00264269	0.0700855	0.00988061	0.451616	0.0286124	0.277503	0.844959	0.47093	1
CKAP4	5	0	1	0	0	0	2.97302	2.97302	0	0.00265275	0.375427	0.00428328	1	0.0276402	0.277503	0.844959	0.297126	1
VN1R4	4	15	0	0	0	4.11944	0	0	0	0.00271062	0.55724	0.00748112	1	0.044104	0.282049	0.844959	0.400947	1
FAM20A	5	0	0	0	1	0	0	0	3.29856	0.00273733	0.266675	0.00830765	0.224636	0.0135931	0.283321	0.844959	0.42806	0.724547
GH2	0	8	0	0	0	10.8008	0	0	0	0.00276116	0.712218	0.0080592	1	0.0469122	0.283509	0.844959	0.420411	1
FAM110B	0	10	0	0	0	9.89188	0	0	0	0.00276814	0.772507	0.00910036	1	0.051867	0.283509	0.844959	0.449549	1
ZNF98	5	24	4	0	1	3.3978	6.03284	6.03284	3.1201	0.00283002	0.0122444	0.0031578	0.234062	0.0060682	0.283949	0.820292	0.244161	0.465514
FAM240A	0	5	0	0	0	14.0655	0	0	0	0.00279982	0.772311	0.00962294	1	0.0543081	0.283949	0.844959	0.464455	1
LILRA2	22	7	0	0	0	0.306207	0	0	0	0.00283609	0.0429981	0.00295112	1	0.0201431	0.283949	0.844959	0.234276	0.870224
MAP9	0	13	1	0	1	9.0879	5.76664	5.76664	2.75898	0.002845	0.2365	0.0116479	0.255796	0.0203081	0.283949	0.844959	0.497592	0.873115
GREM2	0	7	0	0	0	11.4338	0	0	0	0.0028374	0.792784	0.00986054	1	0.0554085	0.283949	0.845222	0.47093	1
ZNF479	3	19	0	0	0	4.16279	0	0	0	0.00288057	0.360899	0.0037573	1	0.0247383	0.286039	0.844959	0.275282	0.947816
RAB6D	0	8	0	0	1	10.6816	0	0	7.01105	0.00290992	0.749528	0.00922882	0.122365	0.00879278	0.287256	0.844959	0.454746	0.565748
POLN	0	14	0	0	0	8.87614	0	0	0	0.00292219	0.532065	0.00373667	1	0.024623	0.287256	0.844959	0.2748	0.947816
ITGB7	4	0	0	0	0	0	0	0	0	0.00298085	0.282733	0.00946316	1	0.0535648	0.291517	0.844959	0.461642	1
GABRA2	0	11	1	0	0	9.42953	7.39443	7.39443	0	0.00301552	0.183317	0.0117583	1	0.0640026	0.291517	0.844959	0.499237	1
POT1	1	15	0	0	0	5.98191	0	0	0	0.00301933	0.429051	0.00367225	1	0.0242624	0.291517	0.844959	0.272952	0.947816
PABPC3	1	17	0	0	0	5.80212	0	0	0	0.00302515	0.546195	0.00606144	1	0.03701	0.291517	0.844959	0.360765	1
PARG	1	19	2	0	0	5.64985	4.73053	4.73053	0	0.00308097	0.135151	0.0120985	1	0.0655094	0.294215	0.844959	0.503929	1
TMEM94	1	18	1	0	0	5.7129	3.10227	3.10227	0	0.00308323	0.391419	0.0122601	1	0.0662217	0.294215	0.844959	0.504322	1
MYB	7	1	0	0	0	0.0903705	0	0	0	0.0031033	0.109177	0.00667142	1	0.0400947	0.294693	0.844959	0.378093	1
TUBB4B	9	1	1	0	0	0.0982598	1.85145	1.85145	0	0.00312259	0.588582	0.00774876	1	0.0454095	0.295092	0.844959	0.411559	1
LTB	18	30	4	8	0	2.3352	16.2044	16.2044	0	0.0032178	4.49e-10	1.08e-09	1	2.34e-08	0.299573	2.93e-06	7.83e-07	1.48e-05
OR6C1	0	8	0	0	0	10.4622	0	0	0	0.0032077	0.765133	0.010432	1	0.0580318	0.299573	0.844959	0.484536	1
CCDC198	0	9	0	0	0	9.97132	0	0	0	0.00321824	0.625092	0.00702586	1	0.0418612	0.299573	0.844959	0.386067	1
STXBP1	3	20	1	0	0	4.05109	1.90169	1.90169	0	0.00323126	0.590155	0.0123118	1	0.0664491	0.299573	0.844959	0.504624	1
ARHGAP10	2	19	0	0	0	4.62289	0	0	0	0.00325588	0.302529	0.00238237	1	0.016771	0.300431	0.844959	0.206212	0.798237
NXPE1	0	11	0	0	0	9.24213	0	0	0	0.00334647	0.670446	0.00828039	1	0.0479755	0.307341	0.844959	0.42806	1
NARS2	0	11	1	0	0	9.20308	6.19109	6.19109	0	0.0034203	0.220071	0.0136317	1	0.0721849	0.312653	0.844959	0.523898	1
KIR2DL4	0	10	0	0	3	9.4607	0	0	12.862	0.00346773	0.662288	0.00844489	0.00846911	0.000754223	0.315515	0.844959	0.428273	0.114373
OR5H15	0	8	0	0	0	10.2701	0	0	0	0.00349663	0.760731	0.0112063	1	0.0615368	0.31572	0.844959	0.494847	1
KCNK6	0	9	0	0	0	9.79888	0	0	0	0.00350226	0.756979	0.0110508	1	0.0608373	0.31572	0.844959	0.494837	1
PATE1	0	5	0	0	0	13.2333	0	0	0	0.00353164	0.747057	0.0114272	1	0.0625269	0.316076	0.844959	0.497592	1
MORC1	0	14	0	0	1	8.57332	0	0	1.81504	0.00353853	0.507319	0.00391075	0.338088	0.0100862	0.316076	0.844959	0.284394	0.612752
OR2J3	1	10	0	0	0	6.5962	0	0	0	0.00357819	0.646665	0.0100632	1	0.0563426	0.318167	0.844959	0.473322	1
PTPRG	3	27	0	0	0	3.77069	0	0	0	0.00360398	0.24108	0.00195395	1	0.0141425	0.31901	0.844959	0.184653	0.731895
CREB1	0	9	0	0	0	9.7069	0	0	0	0.00366502	0.625148	0.00796801	1	0.046472	0.321503	0.844959	0.416765	1
SCARB2	5	0	0	1	0	0	1.28057	1.28057	0	0.0036488	0.823926	0.0107952	1	0.0596828	0.321503	0.854639	0.49225	1
ITPR3	2	24	0	0	1	4.33933	0	0	0.669094	0.00370523	0.345301	0.00342788	0.559827	0.0139243	0.323579	0.844959	0.258904	0.72899
MMP19	0	11	0	0	0	9.04335	0	0	0	0.00374117	0.621789	0.00776327	1	0.04548	0.323974	0.844959	0.411559	1
IRAK1	1	15	0	0	0	5.77695	0	0	0	0.00374287	0.513311	0.00671784	1	0.0403271	0.323974	0.844959	0.378093	1
CCDC91	0	10	0	0	0	9.28909	0	0	0	0.00379824	0.579932	0.00674461	1	0.040461	0.327318	0.844959	0.378093	1
ASAH2B	0	6	0	0	0	11.5789	0	0	0	0.00381913	0.714317	0.0113146	1	0.0620229	0.327627	0.844959	0.49516	1
DUSP4	5	0	0	0	0	0	0	0	0	0.00383532	0.476369	0.0134454	1	0.0713833	0.327627	0.844959	0.518005	1
CDH7	1	16	1	1	0	5.65928	7.21349	7.21349	0	0.00386241	0.063934	0.0109305	1	0.0602946	0.328249	0.844959	0.493814	1
PAX5	1	12	0	0	1	6.10931	0	0	4.56076	0.00387616	0.559433	0.00844895	0.174888	0.0111078	0.328249	0.844959	0.428273	0.637558
DPPA4	2	12	0	0	2	5.0983	0	0	11.7234	0.00390175	0.469421	0.00742649	0.0233376	0.0016743	0.328992	0.844959	0.399112	0.204755
CRNN	2	15	0	0	0	4.75233	0	0	0	0.00397985	0.449701	0.00678618	1	0.0406687	0.334136	0.844959	0.378209	1
FOXI1	0	9	0	0	0	9.51566	0	0	0	0.00403086	0.767931	0.0128762	1	0.0689184	0.336497	0.844959	0.50681	1
ARAP3	1	20	0	0	1	5.36388	0	0	1.15716	0.00405265	0.419751	0.00439399	0.436758	0.0139249	0.336497	0.844959	0.297804	0.72899
FGFR3	2	18	0	0	2	4.52903	0	0	4.41982	0.00407218	0.431468	0.0062499	0.100145	0.00524273	0.336497	0.844959	0.367581	0.430917
ZNF100	0	11	0	0	0	8.88173	0	0	0	0.00409938	0.61094	0.00813366	1	0.0472707	0.336497	0.844959	0.423167	1
APOBEC3H	0	7	0	0	0	10.5141	0	0	0	0.00410789	0.716643	0.0119844	1	0.0650051	0.336497	0.844959	0.503087	1
GRIN3B	1	17	0	0	3	5.5273	0	0	5.13741	0.00411117	0.598077	0.00965357	0.0559736	0.00460552	0.336497	0.844959	0.464455	0.401861
AKR7L	0	9	0	0	0	9.46763	0	0	0	0.00412898	0.687451	0.0108942	1	0.0601308	0.336546	0.844959	0.493316	1
KDM4E	14	4	0	0	0	0.236152	0	0	0	0.00416365	0.121279	0.00793798	1	0.0463268	0.337964	0.844959	0.416765	1
FOLR3	1	10	0	0	0	6.40519	0	0	0	0.00418973	0.609938	0.0107148	1	0.0593187	0.338676	0.844959	0.489728	1
PAK5	4	0	0	0	0	0	0	0	0	0.00422675	0.309892	0.0131775	1	0.0702263	0.339863	0.844959	0.513504	1
LPAR2	5	0	0	0	0	0	0	0	0	0.00423917	0.447408	0.01443	1	0.0755909	0.339863	0.844959	0.538091	1
ZNF571	0	12	0	0	0	8.58801	0	0	0	0.00429915	0.609045	0.00833712	1	0.0482472	0.342881	0.844959	0.42806	1
HIVEP1	2	27	3	0	0	4.1715	5.7603	5.7603	0	0.00431187	0.0418688	0.0111302	1	0.0611947	0.342881	0.844959	0.494837	1
AGO4	6	1	0	0	0	0.092173	0	0	0	0.00438088	0.118042	0.00966328	1	0.0544953	0.346796	0.844959	0.464455	1
MT1E	0	5	0	0	0	12.4815	0	0	0	0.00439656	0.785657	0.0148816	1	0.077498	0.346796	0.844959	0.544139	1
OGT	0	15	0	0	2	8.08692	0	0	3.41513	0.00446941	0.536165	0.00583497	0.138018	0.00654273	0.351127	0.844959	0.354133	0.484806
RPA3	0	5	0	0	0	12.3509	0	0	0	0.00457147	0.748612	0.014539	1	0.0760523	0.356647	0.844959	0.53891	1
F2R	5	0	0	0	0	0	0	0	0	0.00457984	0.424763	0.0152078	1	0.0788668	0.356647	0.844959	0.548383	1
PGLYRP2	7	1	0	0	0	0.0985522	0	0	0	0.0046126	0.30951	0.013916	1	0.0734029	0.356647	0.844959	0.528421	1
SNX13	3	0	1	0	0	0	0.99758	0.99758	0	0.00460886	0.998267	0.0132229	1	0.0704226	0.356647	0.998471	0.514247	1
TMEM212	9	0	0	0	0	0	0	0	0	0.004645	0.278181	0.0122105	1	0.0660034	0.357238	0.844959	0.503929	1
PANK3	2	13	1	0	0	4.82549	2.97493	2.97493	0	0.00466671	0.392298	0.0182381	1	0.0912679	0.357238	0.844959	0.594354	1
MICAL1	0	14	0	0	0	8.13714	0	0	0	0.00468185	0.562955	0.00716253	1	0.0425375	0.357238	0.844959	0.390353	1
NUAK1	0	12	0	0	0	8.44178	0	0	0	0.00469329	0.646071	0.0104526	1	0.058126	0.357238	0.844959	0.484536	1
PRAMEF11	1	12	0	0	0	5.89523	0	0	0	0.00474017	0.612951	0.0118994	1	0.0646286	0.359408	0.844959	0.50091	1
IQCF5	0	6	0	0	0	10.9294	0	0	0	0.00482582	0.734787	0.0146733	1	0.0766201	0.363112	0.844959	0.539548	1
GPR45	5	0	0	0	0	0	0	0	0	0.00482858	0.504353	0.0167652	1	0.085309	0.363112	0.844959	0.574363	1
UBE2Z	5	0	0	0	0	0	0	0	0	0.00484472	0.395069	0.0156154	1	0.0805675	0.363112	0.844959	0.552898	1
BCAN	8	2	0	0	0	0.151649	0	0	0	0.0048652	0.149579	0.0111206	1	0.0611518	0.363256	0.844959	0.494837	1
OR3A1	0	8	0	0	1	9.54132	0	0	5.55223	0.00489054	0.759632	0.015267	0.148999	0.0161187	0.36376	0.844959	0.548383	0.784365
ELMOD3	0	9	0	0	0	9.11648	0	0	0	0.00493186	0.645708	0.0113741	1	0.0622892	0.365444	0.844959	0.496651	1
KANK1	22	15	0	1	1	0.39998	0.362186	0.362186	1.32137	0.00501518	0.242145	0.0163351	0.406988	0.0399782	0.369393	0.844959	0.564571	1
NIPSNAP2	0	8	0	0	0	9.48226	0	0	0	0.00502834	0.626137	0.0110573	1	0.0608666	0.369393	0.844959	0.494837	1
NGRN	0	8	1	0	0	9.45438	13.0977	13.0977	0	0.00509488	0.0998251	0.0137487	1	0.0726867	0.369393	0.844959	0.525822	1
ETV3	4	0	1	0	0	0	2.28744	2.28744	0	0.0051162	0.491253	0.00945654	1	0.0535339	0.369393	0.844959	0.461642	1
ZSCAN5C	0	10	0	0	0	8.73771	0	0	0	0.00511643	0.675796	0.0127631	1	0.0684256	0.369393	0.844959	0.505336	1
C7orf77	1	5	0	0	0	8.77118	0	0	0	0.0051707	0.676869	0.0158969	1	0.0817359	0.369393	0.844959	0.556306	1
HNRNPU	2	19	0	0	2	4.32027	0	0	4.32886	0.00517557	0.340509	0.00496	0.102884	0.00437867	0.369393	0.844959	0.317083	0.39641
ATP5MF	4	8	0	0	0	4.81308	0	0	0	0.0051882	0.539936	0.0139539	1	0.0735649	0.369393	0.844959	0.528421	1
APLP2	8	2	0	0	2	0.153778	0	0	4.68015	0.00521857	0.110228	0.0103792	0.0928888	0.00765921	0.369393	0.844959	0.483425	0.522598
MGAT4C	1	13	0	0	1	5.66377	0	0	3.7324	0.00522498	0.524454	0.00991038	0.204618	0.0146021	0.369393	0.844959	0.47093	0.743868
TGFBR3	0	12	0	0	1	8.25684	0	0	2.09838	0.00524852	0.594609	0.00955386	0.308261	0.0201079	0.369393	0.844959	0.464455	0.870224
PNPLA4	0	7	0	0	0	9.91982	0	0	0	0.0052717	0.701044	0.0145857	1	0.0762499	0.369393	0.844959	0.53891	1
ZNF676	1	14	1	1	0	5.5458	7.82365	7.82365	0	0.00527822	0.0550009	0.0127319	1	0.0682895	0.369393	0.844959	0.505197	1
FAM167A	0	7	0	0	0	9.91591	0	0	0	0.00528052	0.784566	0.0172567	1	0.0873114	0.369393	0.844959	0.581135	1
SHISA9	1	12	0	0	0	5.77571	0	0	0	0.00531063	0.591654	0.0125292	1	0.0674032	0.369393	0.844959	0.505197	1
GABRB3	2	15	0	1	0	4.53826	2.72109	2.72109	0	0.00533518	0.428109	0.0206139	1	0.100633	0.369393	0.844959	0.631237	1
PPP6R1	1	15	1	0	1	5.44256	3.75827	3.75827	2.027	0.00534394	0.324086	0.0206196	0.315262	0.0392365	0.369393	0.844959	0.631237	1
ATXN2	7	2	1	0	2	0.147107	0.830368	0.830368	2.72118	0.00529711	0.857422	0.0179877	0.178468	0.0216415	0.369393	0.875	0.588419	0.904529
RSBN1	6	1	1	0	0	0.0964543	1.08614	1.08614	0	0.00531443	0.938974	0.0158588	1	0.0815784	0.369393	0.945792	0.556306	1
CYB561	0	8	0	0	0	9.32481	0	0	0	0.00541741	0.723408	0.0155651	1	0.0803582	0.373013	0.844959	0.552603	1
RUBCNL	0	11	0	0	1	8.39129	0	0	2.69656	0.00543445	0.61061	0.0106994	0.259971	0.0191502	0.373013	0.844959	0.489728	0.841575
AFDN	15	11	0	0	1	0.341271	0	0	0.974288	0.00550668	0.0103545	0.0029581	0.475689	0.0106467	0.376649	0.770909	0.234276	0.628674
LGALS3BP	0	10	2	0	0	8.58399	24.2711	24.2711	0	0.00556797	0.00925408	0.00481109	1	0.0304871	0.379514	0.739054	0.311638	1
ADAMTS6	0	15	0	1	0	7.74244	4.1003	4.1003	0	0.00563001	0.330761	0.0209319	1	0.101865	0.382411	0.844959	0.633561	1
HSD17B7	10	1	0	0	0	0.114354	0	0	0	0.00572664	0.168318	0.0121974	1	0.0659457	0.387628	0.844959	0.503929	1
DHX37	12	5	1	1	2	0.258535	1.042	1.042	3.08777	0.00586045	0.957001	0.0166642	0.155152	0.0179894	0.395318	0.961325	0.57291	0.82802
EPHB2	0	13	1	0	0	7.90818	8.41546	8.41546	0	0.0059132	0.160137	0.0205192	1	0.100265	0.397505	0.844959	0.631127	1
KMT2B	5	36	10	1	7	2.91245	11.7931	11.7931	4.60778	0.00600991	1.02e-06	5.35e-06	0.0375123	3.3e-06	0.402623	0.00153331	0.00213773	0.00134422
GPRIN3	0	12	0	0	0	8.02053	0	0	0	0.00606317	0.685396	0.0151526	1	0.0786358	0.404805	0.844959	0.548383	1
CLCN2	1	16	1	0	0	5.24231	3.47265	3.47265	0	0.00611783	0.350563	0.0233372	1	0.111032	0.405467	0.844959	0.660669	1
CLIC5	0	9	0	0	0	8.69144	0	0	0	0.00614315	0.673362	0.0152468	1	0.0790299	0.405467	0.844959	0.548383	1
ZNF737	1	13	1	0	2	5.501	4.7583	4.7583	6.65854	0.00615196	0.254971	0.0223304	0.0566948	0.00971274	0.405467	0.844959	0.650041	0.598005
MPPED1	0	8	0	0	0	9.04245	0	0	0	0.00620246	0.712862	0.0172352	1	0.087224	0.405467	0.844959	0.581135	1
SPEM2	0	11	1	0	0	8.15559	11.8888	11.8888	0	0.00623818	0.110829	0.0179688	1	0.0901877	0.405467	0.844959	0.588419	1
CIRBP	5	0	0	0	0	0	0	0	0	0.00626225	0.333822	0.0184259	1	0.0920189	0.405467	0.844959	0.597605	1
NMRK1	0	6	0	0	0	10.2147	0	0	0	0.00630886	0.664679	0.0160469	1	0.0823567	0.405467	0.844959	0.559098	1
MIPEP	0	12	0	0	0	7.95353	0	0	0	0.00631821	0.554842	0.00959376	1	0.0541725	0.405467	0.844959	0.464455	1
MUC5AC	19	16	0	1	0	0.400579	0.415466	0.415466	0	0.00632362	0.325356	0.0223105	1	0.107151	0.405467	0.844959	0.650041	1
IQGAP2	1	19	0	0	0	5.03476	0	0	0	0.00637431	0.348129	0.0044633	1	0.0286181	0.405467	0.844959	0.299291	1
EXTL3	12	5	0	0	0	0.262228	0	0	0	0.00641683	0.136546	0.0128568	1	0.0688336	0.405467	0.844959	0.50681	1
AC018554.3	5	0	0	0	0	0	0	0	0	0.00643186	0.477586	0.0212585	1	0.103125	0.405467	0.844959	0.634746	1
SIRPD	0	6	0	0	0	10.1605	0	0	0	0.00644128	0.751847	0.0197721	1	0.0973475	0.405467	0.844959	0.61885	1
ELAC2	0	12	0	0	0	7.92058	0	0	0	0.00644787	0.572253	0.0106224	1	0.0588989	0.405467	0.844959	0.488929	1
HOGA1	5	0	0	0	0	0	0	0	0	0.00645324	0.358787	0.0194043	1	0.095901	0.405467	0.844959	0.612364	1
SLC19A1	1	13	0	0	0	5.45086	0	0	0	0.00647164	0.619804	0.0161105	1	0.0826191	0.405467	0.844959	0.559775	1
PRKD1	1	16	0	0	1	5.19194	0	0	1.94117	0.00647199	0.449306	0.00866392	0.324119	0.0193066	0.405467	0.844959	0.433751	0.844912
KLK15	1	10	0	0	0	5.88744	0	0	0	0.00650111	0.636686	0.0171989	1	0.0870764	0.405467	0.844959	0.581135	1
SLC38A7	0	9	0	0	0	8.58129	0	0	0	0.00650837	0.674789	0.0161671	1	0.0828528	0.405467	0.844959	0.560746	1
PCDHB2	17	7	1	0	0	0.31952	1.12713	1.12713	0	0.00641671	0.908879	0.021207	1	0.102927	0.405467	0.918837	0.63433	1
INPP5D	6	1	1	0	0	0.100142	1.00771	1.00771	0	0.00621664	0.994269	0.0192186	1	0.0951681	0.405467	0.994879	0.612364	1
TCEAL1	0	6	0	0	0	10.1145	0	0	0	0.00655635	0.79009	0.0213832	1	0.103605	0.40716	0.844959	0.634746	1
ZFP36L2	4	0	0	1	1	0	6.06621	6.06621	3.61175	0.0066573	0.178623	0.00546298	0.209816	0.0089076	0.41082	0.844959	0.338912	0.565748
HSP90AB1	6	1	0	1	0	0.101813	1.11434	1.11434	0	0.00665661	0.920356	0.0194914	1	0.0962443	0.41082	0.929048	0.613265	1
P3H3	0	12	0	0	0	7.86349	0	0	0	0.0066793	0.627195	0.0137503	1	0.0726938	0.410882	0.844959	0.525822	1
MS4A5	1	7	0	0	0	6.75413	0	0	0	0.00672403	0.617872	0.0176387	1	0.0888579	0.411048	0.844959	0.584907	1
SMARCA4	5	30	0	1	0	2.94762	1.04343	1.04343	0	0.006715	0.968725	0.0177961	1	0.0894924	0.411048	0.972254	0.586072	1
DPEP1	2	13	1	0	0	4.5349	4.0023	4.0023	0	0.00676085	0.290673	0.0239258	1	0.113236	0.411313	0.844959	0.662004	1
HOXC9	5	0	0	0	0	0	0	0	0	0.00677042	0.516279	0.0227597	1	0.108854	0.411313	0.844959	0.652749	1
SLC35F5	0	10	0	0	1	8.22317	0	0	3.41187	0.00680884	0.572348	0.0116059	0.219038	0.0177307	0.411881	0.844959	0.497592	0.823961
ISM2	1	13	0	1	0	5.39765	5.1938	5.1938	0	0.00683034	0.232828	0.0238063	1	0.11279	0.411881	0.844959	0.662004	1
LRRIQ4	1	12	0	0	0	5.51076	0	0	0	0.00685523	0.560842	0.0146284	1	0.0764304	0.411881	0.844959	0.53891	1
SPIN3	0	7	0	0	0	9.31181	0	0	0	0.00686661	0.754539	0.0208569	1	0.101575	0.411881	0.844959	0.633546	1
PRSS21	0	8	0	0	0	8.81931	0	0	0	0.00691334	0.681571	0.0176518	1	0.0889108	0.411881	0.844959	0.584907	1
EEF2KMT	3	14	0	0	0	3.96416	0	0	0	0.00691335	0.440987	0.0127291	1	0.0682774	0.411881	0.844959	0.505197	1
SLC13A5	4	0	0	0	0	0	0	0	0	0.00692714	0.360965	0.0211921	1	0.102869	0.411881	0.844959	0.63433	1
SP140	4	24	9	4	9	3.23824	12.1632	12.1632	18.5373	0.00701478	3.45e-07	2.17e-06	0.000118171	5.92e-09	0.414354	0.000612787	0.000964732	3.86e-06
PTGES2	0	9	0	0	0	8.44464	0	0	0	0.0069952	0.683272	0.0177136	1	0.0891598	0.414354	0.844959	0.584907	1
ZNF112	0	13	1	0	0	7.63421	5.60133	5.60133	0	0.00704755	0.24353	0.0263717	1	0.122245	0.414354	0.844959	0.684507	1
INCENP	1	17	1	0	1	5.05244	3.38103	3.38103	1.9454	0.00705978	0.359917	0.026532	0.323671	0.0494428	0.414354	0.844959	0.684507	1
ZNF516	5	27	0	0	0	2.97707	0	0	0	0.0070794	0.380052	0.0112975	1	0.0619463	0.414354	0.844959	0.49516	1
TMC3	10	4	1	4	0	0.233823	2.74008	2.74008	0	0.00711513	0.0829547	0.00067719	1	0.00561902	0.414354	0.844959	0.0946228	0.441443
EIF3E	4	0	0	0	0	0	0	0	0	0.00711701	0.25398	0.0192247	1	0.0951924	0.414354	0.844959	0.612364	1
FUK	1	16	0	1	0	5.09751	3.46173	3.46173	0	0.00719533	0.351653	0.0270039	1	0.124536	0.416202	0.844959	0.690522	1
ETFB	0	8	0	1	0	8.73598	16.6337	16.6337	0	0.00720183	0.0769656	0.0156513	1	0.080717	0.416202	0.844959	0.552898	1
RACGAP1	0	11	0	0	0	7.91054	0	0	0	0.00721259	0.561423	0.0114924	1	0.0628185	0.416202	0.844959	0.497592	1
NPBWR2	0	8	1	0	0	8.71651	32.2945	32.2945	0	0.00727118	0.0370608	0.00937474	1	0.0531523	0.418053	0.844959	0.460776	1
ATG4D	0	10	0	1	1	8.10289	10.0144	10.0144	3.76383	0.0072874	0.1332	0.0222111	0.203306	0.0289011	0.418053	0.844959	0.649468	1
ASXL3	5	36	1	2	0	2.84569	2.83636	2.83636	0	0.00732988	0.169747	0.025564	1	0.119296	0.41926	0.844959	0.678354	1
TMEM18	0	5	0	0	0	10.8289	0	0	0	0.00736925	0.711726	0.0210621	1	0.102368	0.420283	0.844959	0.633561	1
DYNC1I1	0	11	3	0	0	7.86072	16.6908	16.6908	0	0.00743019	0.00678583	0.00676355	1	0.0405557	0.421303	0.641277	0.378093	1
ADGRL3	4	30	0	0	0	3.10442	0	0	0	0.00742263	0.182809	0.00297849	1	0.0203024	0.421303	0.844959	0.23494	0.873115
OR10AG1	1	9	0	0	0	5.9418	0	0	0	0.00746513	0.662687	0.0207748	1	0.101257	0.422061	0.844959	0.632032	1
TFAM	0	7	0	0	1	9.10662	0	0	7.23813	0.00752371	0.628654	0.0167212	0.119053	0.0143714	0.422956	0.844959	0.573859	0.737885
FAM222A	4	0	0	0	0	0	0	0	0	0.00754467	0.552213	0.0257921	1	0.120131	0.422956	0.844959	0.67998	1
RALA	0	6	0	0	0	9.75382	0	0	0	0.00754583	0.70268	0.0207523	1	0.101169	0.422956	0.844959	0.632032	1
PKN3	0	12	0	1	0	7.65163	6.59827	6.59827	0	0.00761974	0.206198	0.0273986	1	0.125958	0.425229	0.844959	0.6953	1
TMPRSS5	3	16	2	1	1	3.77041	6.13596	6.13596	3.90353	0.00762986	0.0304086	0.0115027	0.197673	0.0161127	0.425229	0.844959	0.497592	0.784365
ABCB10	6	1	0	0	0	0.105444	0	0	0	0.00768023	0.242752	0.0203312	1	0.0995336	0.42682	0.844959	0.629037	1
PASK	2	19	1	0	0	4.06048	2.59451	2.59451	0	0.00775313	0.448287	0.028756	1	0.130808	0.4282	0.844959	0.70847	1
KIAA2026	2	24	0	0	2	3.9023	0	0	1.69945	0.00776974	0.349562	0.00754793	0.28128	0.0151904	0.4282	0.844959	0.403422	0.761935
ACTG1	5	18	0	0	1	3.18603	0	0	4.75484	0.00777072	0.400872	0.013887	0.169134	0.0165679	0.4282	0.844959	0.528421	0.796318
STX12	1	9	0	0	0	5.88651	0	0	0	0.00781002	0.509767	0.0147267	1	0.0768452	0.429151	0.844959	0.540076	1
HTR1D	0	8	0	0	0	8.56629	0	0	0	0.00783186	0.766341	0.0238585	1	0.112985	0.429151	0.844959	0.662004	1
ART3	0	8	1	0	0	8.53634	7.50167	7.50167	0	0.00794935	0.180594	0.0265937	1	0.123051	0.430173	0.844959	0.684507	1
ANGPT1	1	12	0	0	1	5.35865	0	0	3.5828	0.00795429	0.458703	0.0117365	0.211103	0.0173444	0.430173	0.844959	0.499237	0.819619
DYTN	1	13	1	0	0	5.24803	3.25442	3.25442	0	0.0079572	0.373625	0.0295509	1	0.133619	0.430173	0.844959	0.71544	1
KIF22	3	0	0	0	0	0	0	0	0	0.00796046	0.316235	0.0237248	1	0.112485	0.430173	0.844959	0.661277	1
KCTD3	9	3	0	2	1	0.207072	1.04751	1.04751	2.19095	0.00794299	0.952425	0.0210842	0.299636	0.0383124	0.430173	0.957368	0.633561	1
FASTKD5	3	0	0	0	1	0	0	0	2.33702	0.00802901	0.356214	0.0247399	0.286976	0.0422271	0.432597	0.844959	0.666576	1
GREB1L	6	2	0	0	1	0.152135	0	0	0.929219	0.00806313	0.115046	0.0165751	0.486416	0.0469275	0.432597	0.844959	0.570848	1
GFRA4	4	0	0	0	0	0	0	0	0	0.00809199	0.453811	0.0260072	1	0.120917	0.432597	0.844959	0.683808	1
ABHD17A	21	7	0	0	0	0.344523	0	0	0	0.00809378	0.14995	0.014622	1	0.0764034	0.432597	0.844959	0.53891	1
BMP3	1	12	1	1	0	5.33389	12.6861	12.6861	0	0.00815045	0.0217371	0.00941777	1	0.0533532	0.434439	0.844959	0.461642	1
CLIC3	5	0	0	0	0	0	0	0	0	0.00827995	0.474113	0.026467	1	0.122591	0.437695	0.844959	0.684507	1
FAM57A	0	7	0	0	0	8.89363	0	0	0	0.00828248	0.711904	0.022756	1	0.10884	0.437695	0.844959	0.652749	1
UHRF2	7	2	0	0	0	0.161888	0	0	0	0.00829645	0.1	0.0152068	1	0.0788627	0.437695	0.844959	0.548383	1
ZNF629	6	1	0	0	1	0.107502	0	0	2.05496	0.00830308	0.331553	0.0242203	0.312481	0.0445307	0.437695	0.844959	0.663062	1
RAB40AL	0	7	1	0	0	8.88007	23.4282	23.4282	0	0.00833365	0.0528358	0.0133004	1	0.0707577	0.437695	0.844959	0.515497	1
LETM2	0	9	1	0	0	8.11454	6.542	6.542	0	0.00834579	0.208017	0.0292682	1	0.132622	0.437695	0.844959	0.711236	1
ENAM	0	14	2	0	0	7.2473	11.4309	11.4309	0	0.00842596	0.0397161	0.0190143	1	0.0943596	0.439791	0.844959	0.608769	1
SPATA16	1	13	0	0	0	5.19142	0	0	0	0.00843373	0.457288	0.0121665	1	0.0658096	0.439791	0.844959	0.503929	1
ITGAE	2	19	0	0	0	4.00513	0	0	0	0.00845647	0.345358	0.00841889	1	0.0486383	0.439791	0.844959	0.428273	1
HOMER2	0	8	0	0	0	8.40798	0	0	0	0.00847568	0.638499	0.0189265	1	0.0940117	0.439791	0.844959	0.608352	1
TSPAN12	0	7	0	0	0	8.83271	0	0	0	0.00851522	0.670794	0.0211695	1	0.102782	0.439806	0.844959	0.63433	1
SMIM7	1	5	0	0	0	7.68627	0	0	0	0.00852094	0.674392	0.0249834	1	0.117161	0.439806	0.844959	0.668578	1
USP26	0	12	0	0	4	7.46545	0	0	7.82415	0.00856436	0.62285	0.0172249	0.0168851	0.00265912	0.440884	0.844959	0.581135	0.287097
ZNF429	0	11	2	0	2	7.6156	14.1824	14.1824	5.29724	0.00860984	0.0264722	0.0144411	0.0785541	0.00882758	0.442062	0.844959	0.538091	0.565748
KCNMA1	1	16	0	1	1	4.93127	3.00087	3.00087	1.38698	0.00868222	0.404166	0.0317199	0.396223	0.0675738	0.443451	0.844959	0.736124	1
GNG8	0	4	0	0	0	11.9375	0	0	0	0.00867856	0.868277	0.0304094	1	0.13663	0.443451	0.883452	0.722806	1
MB	0	5	0	0	0	10.3189	0	0	0	0.00873727	0.78518	0.0278187	1	0.127467	0.444693	0.844959	0.6953	1
PI4KA	12	7	1	0	0	0.304646	0.382531	0.382531	0	0.00875201	0.286801	0.0298404	1	0.134637	0.444693	0.844959	0.715525	1
AADACL3	0	8	0	0	1	8.32578	0	0	4.38191	0.00883316	0.714525	0.0240303	0.18055	0.0279418	0.447654	0.844959	0.662004	1
KCNQ4	3	0	1	0	0	0	2.7115	2.7115	0	0.00888217	0.421094	0.0130536	1	0.0696891	0.447952	0.844959	0.511732	1
CENPO	0	7	0	0	0	8.73974	0	0	0	0.00888484	0.648974	0.0207697	1	0.101237	0.447952	0.844959	0.632032	1
MRPS28	0	6	4	0	0	9.25187	89.3871	89.3871	0	0.00922569	5.43e-06	1.56e-05	1	0.00018868	0.448316	0.00505571	0.00523408	0.0391909
FMNL2	1	16	8	0	1	4.89179	19.0334	19.0334	1.6357	0.0090806	1.25e-05	6.37e-05	0.360195	0.000267962	0.448316	0.0102253	0.0148294	0.0489895
CR1L	0	10	3	0	0	7.69894	20.0087	20.0087	0	0.00918402	0.00413678	0.00517849	1	0.0324341	0.448316	0.490446	0.329972	1
NLRP13	1	15	3	0	0	4.94533	10.7883	10.7883	0	0.00919455	0.0108849	0.0088497	1	0.0506855	0.448316	0.779468	0.441627	1
SUPT16H	0	13	1	0	1	7.26105	3.99843	3.99843	1.70593	0.00898236	0.338789	0.0322874	0.351197	0.0621331	0.448316	0.844959	0.740668	1
CHID1	4	0	1	0	0	0	1.6772	1.6772	0	0.00898954	0.655757	0.0210322	1	0.102252	0.448316	0.844959	0.633561	1
FERMT2	6	1	0	0	0	0.109675	0	0	0	0.00899408	0.145351	0.0189932	1	0.0942761	0.448316	0.844959	0.608769	1
ETHE1	0	7	0	0	0	8.70593	0	0	0	0.00902379	0.722754	0.025205	1	0.117978	0.448316	0.844959	0.672662	1
VHLL	0	5	0	0	0	10.2193	0	0	0	0.0090387	0.784593	0.0286634	1	0.13048	0.448316	0.844959	0.707302	1
TUBA1A	7	1	0	0	0	0.115207	0	0	0	0.00905012	0.302367	0.0247308	1	0.116228	0.448316	0.844959	0.666576	1
KRI1	1	14	0	0	0	5.02582	0	0	0	0.00913812	0.438017	0.0119069	1	0.0646621	0.448316	0.844959	0.50091	1
MUC7	0	8	0	0	0	8.25654	0	0	0	0.0091474	0.755729	0.0269856	1	0.12447	0.448316	0.844959	0.690522	1
BHMT2	0	8	0	0	0	8.24125	0	0	0	0.00921844	0.65812	0.0217028	1	0.104831	0.448316	0.844959	0.639383	1
ZNF662	0	9	0	0	0	7.92975	0	0	0	0.00922595	0.642727	0.0204705	1	0.100076	0.448316	0.844959	0.630622	1
TBRG1	4	0	0	0	0	0	0	0	0	0.00923584	0.326427	0.0262108	1	0.12166	0.448316	0.844959	0.684507	1
PVRIG	1	10	0	0	2	5.47854	0	0	10.9347	0.00931427	0.614148	0.0228572	0.026176	0.00503862	0.451004	0.844959	0.652749	0.42122
TMEM169	0	7	0	0	1	8.62489	0	0	5.99939	0.00936694	0.715074	0.0256699	0.139678	0.0237751	0.452435	0.844959	0.678354	0.945266
PODN	1	13	0	2	2	5.07998	11.3639	11.3639	5.40126	0.00946299	0.0269678	0.0125057	0.0764687	0.00760486	0.455948	0.844959	0.505197	0.522598
COL25A1	0	11	2	0	0	7.45215	7.30311	7.30311	0	0.0095085	0.0884535	0.0298522	1	0.134678	0.457016	0.844959	0.715525	1
ZCCHC9	5	0	0	0	0	0	0	0	0	0.00969743	0.321053	0.0264098	1	0.122384	0.464954	0.844959	0.684507	1
COX15	4	0	0	0	0	0	0	0	0	0.00978612	0.281215	0.0260815	1	0.121188	0.467257	0.844959	0.684507	1
NPPB	0	5	0	0	0	9.98631	0	0	0	0.00979323	0.776259	0.0304615	1	0.136812	0.467257	0.844959	0.723166	1
BBS4	0	9	0	0	0	7.81161	0	0	0	0.00984218	0.578729	0.0174323	1	0.088023	0.46845	0.844959	0.584907	1
ARID1B	14	9	4	1	4	0.345558	2.74992	2.74992	3.06527	0.00989697	0.0741831	0.0010792	0.110309	0.00119473	0.469484	0.844959	0.131126	0.164587
NOD1	0	11	0	0	0	7.38415	0	0	0	0.00991193	0.659294	0.0225505	1	0.108062	0.469484	0.844959	0.651599	1
SART1	0	11	0	0	1	7.36429	0	0	2.23198	0.0100332	0.59017	0.01798	0.295967	0.0331848	0.474081	0.844959	0.588419	1
DHRS7C	0	7	0	1	0	8.46153	14.2747	14.2747	0	0.0101047	0.0909286	0.0224875	1	0.107823	0.476307	0.844959	0.650739	1
RAB27B	0	6	0	1	0	9.02266	13.611	13.611	0	0.0101346	0.0957522	0.0226933	1	0.108603	0.476569	0.844959	0.652749	1
BOK	0	7	0	0	0	8.44123	0	0	0	0.0102009	0.783532	0.031438	1	0.140205	0.478535	0.844959	0.736124	1
EP300	1	21	0	0	1	4.56812	0	0	0.740297	0.0102882	0.342443	0.00697478	0.537498	0.0246915	0.481112	0.844959	0.38434	0.947816
CASTOR3	7	0	0	1	0	0	2.61245	2.61245	0	0.0103432	0.422896	0.0207217	1	0.101051	0.481112	0.844959	0.632032	1
CFAP161	0	7	0	0	2	8.40262	0	0	11.8399	0.0103867	0.672981	0.0256209	0.0229579	0.00496351	0.481112	0.844959	0.678354	0.416722
PLS3	3	0	0	0	0	0	0	0	0	0.0103935	0.281893	0.0286417	1	0.130403	0.481112	0.844959	0.707302	1
NGDN	4	0	0	0	0	0	0	0	0	0.0104026	0.278007	0.0273327	1	0.125722	0.481112	0.844959	0.6953	1
IFNG	0	5	0	0	3	9.81306	0	0	32.1165	0.0104034	0.697804	0.0281035	0.000839458	0.000274952	0.481112	0.844959	0.700332	0.049802
TTC30A	8	2	0	0	1	0.177585	0	0	2.68441	0.0104622	0.233859	0.0254316	0.260799	0.0398998	0.481826	0.844959	0.676861	1
LYPD1	1	6	0	0	0	6.55205	0	0	0	0.0105307	0.69141	0.030669	1	0.137535	0.481826	0.844959	0.725451	1
KIF1C	9	4	0	0	0	0.24296	0	0	0	0.010547	0.0780716	0.0160258	1	0.0822694	0.481826	0.844959	0.559098	1
HEXA	1	12	0	0	1	5.07405	0	0	3.30465	0.0105509	0.458121	0.0154506	0.224328	0.0231	0.481826	0.844959	0.550866	0.925987
NRXN1	3	23	1	1	0	3.34019	3.19438	3.19438	0	0.0105969	0.215837	0.0360264	1	0.15576	0.481826	0.844959	0.760455	1
CCT3	3	0	0	0	1	0	0	0	3.27439	0.0106101	0.301736	0.0297901	0.225868	0.0403811	0.481826	0.844959	0.715525	1
GAPT	0	5	0	0	0	9.75554	0	0	0	0.0106158	0.778538	0.0328721	1	0.145135	0.481826	0.844959	0.740668	1
RETNLB	0	4	0	0	0	11.2134	0	0	0	0.0105457	0.799552	0.0339193	1	0.148694	0.481826	0.845602	0.74975	1
MMP21	6	1	3	0	0	0.11472	4.98368	4.98368	0	0.0107359	0.0413625	0.000913424	1	0.00730585	0.485442	0.844959	0.118225	0.508602
FAM9A	0	8	0	0	1	7.94132	0	0	5.36882	0.0107451	0.642815	0.0239962	0.153193	0.0242837	0.485442	0.844959	0.662004	0.947816
GRHL2	2	15	0	0	0	4.03623	0	0	0	0.0107969	0.342566	0.0111805	1	0.0614209	0.486659	0.844959	0.494847	1
MYF5	5	0	0	0	0	0	0	0	0	0.0109016	0.401627	0.0317536	1	0.141295	0.489253	0.844959	0.736124	1
IGHV3-72	1	5	1	0	0	7.18571	22.6635	22.6635	0	0.0109125	0.0467379	0.0112561	1	0.0617607	0.489253	0.844959	0.49516	1
RSAD1	0	9	0	0	0	7.61308	0	0	0	0.0109826	0.664161	0.0256958	1	0.119779	0.489253	0.844959	0.678354	1
SOAT2	0	9	1	0	0	7.61101	7.4454	7.4454	0	0.0109953	0.182013	0.0354621	1	0.15388	0.489253	0.844959	0.760455	1
PHAX	0	8	2	0	0	7.89511	17.0044	17.0044	0	0.0110046	0.0186676	0.0126273	1	0.0678326	0.489253	0.844959	0.505197	1
PCNT	4	30	1	0	0	2.94915	1.02008	1.02008	0	0.0109823	0.985528	0.0258914	1	0.120494	0.489253	0.987244	0.681678	1
APLNR	0	8	0	0	0	7.88938	0	0	0	0.0110372	0.772068	0.0329643	1	0.14545	0.489592	0.844959	0.740668	1
HRH2	1	10	0	0	0	5.28424	0	0	0	0.0110948	0.666422	0.0299007	1	0.134848	0.490803	0.844959	0.715525	1
KRTAP4-9	3	11	1	0	0	3.92923	5.64099	5.64099	0	0.0111147	0.196864	0.0288397	1	0.131105	0.490803	0.844959	0.709637	1
BCL10	0	6	0	0	1	8.7903	0	0	7.64025	0.0111636	0.700878	0.0296595	0.113609	0.0225525	0.491851	0.844959	0.715525	0.917196
PRG4	9	42	0	0	4	2.27761	0	0	5.08987	0.0112357	0.128989	0.0045347	0.0443408	0.00191257	0.49327	0.844959	0.302237	0.224034
ADCY8	4	23	1	0	0	3.05702	1.57159	1.57159	0	0.0112462	0.694589	0.0376875	1	0.161243	0.49327	0.844959	0.771174	1
RGS18	0	6	0	0	0	8.76117	0	0	0	0.0113009	0.684723	0.0289503	1	0.131497	0.493403	0.844959	0.710571	1
ZNF454	0	9	0	0	0	7.56132	0	0	0	0.0113034	0.618845	0.0230179	1	0.109829	0.493403	0.844959	0.655423	1
TBC1D10B	0	11	0	0	1	7.1664	0	0	2.20991	0.0113336	0.627815	0.0231949	0.297929	0.041288	0.493403	0.844959	0.657593	1
NKAP	0	9	0	0	0	7.55304	0	0	0	0.0113557	0.596088	0.021374	1	0.10357	0.493403	0.844959	0.634746	1
IFNA1	0	5	0	0	0	9.56062	0	0	0	0.0113754	0.782042	0.0351577	1	0.152863	0.493403	0.844959	0.760455	1
ST8SIA3	4	0	1	1	0	0	5.21728	5.21728	0	0.0114254	0.0864933	0.00338366	1	0.0226326	0.494478	0.844959	0.257553	0.91747
TMEM8B	0	11	0	0	0	7.14152	0	0	0	0.0115096	0.64293	0.0247213	1	0.116192	0.496962	0.844959	0.666576	1
KCND2	0	10	0	0	1	7.30954	0	0	2.83331	0.0115336	0.642754	0.0250057	0.250996	0.0381034	0.496962	0.844959	0.668578	1
NDC80	0	10	0	1	0	7.29718	4.85531	4.85531	0	0.0116182	0.280739	0.0413091	1	0.172948	0.499508	0.844959	0.806476	1
KCTD17	4	0	0	0	0	0	0	0	0	0.0116995	0.367198	0.0333794	1	0.146863	0.500626	0.844959	0.74483	1
ACOXL	3	0	0	0	0	0	0	0	0	0.0117115	0.323112	0.0330768	1	0.145833	0.500626	0.844959	0.740668	1
CD83	1	7	0	0	0	5.93672	0	0	0	0.0117377	0.613649	0.0292169	1	0.132441	0.500626	0.844959	0.711236	1
OR52I1	0	7	0	0	0	8.14153	0	0	0	0.0117493	0.746153	0.0335903	1	0.14758	0.500626	0.844959	0.746818	1
PBX2	2	13	0	0	0	4.1123	0	0	0	0.0117722	0.460201	0.0204515	1	0.100002	0.500626	0.844959	0.630622	1
ZEB1	0	13	1	0	4	6.84853	5.5456	5.5456	6.35104	0.0118024	0.245987	0.0415014	0.027574	0.00889501	0.50082	0.844959	0.807531	0.565748
TMEM87B	3	0	0	0	0	0	0	0	0	0.0118802	0.281205	0.0319802	1	0.142076	0.503032	0.844959	0.738603	1
AFTPH	0	12	0	0	0	6.94325	0	0	0	0.0119541	0.584434	0.0206081	1	0.10061	0.505069	0.844959	0.631237	1
TMEM115	4	0	0	0	1	0	0	0	5.07903	0.0120571	0.53237	0.0384976	0.160324	0.037574	0.507307	0.844959	0.774784	1
MAN2B1	3	20	0	0	0	3.35223	0	0	0	0.0120838	0.305929	0.01165	1	0.063521	0.507307	0.844959	0.497592	1
TNRC6C	11	7	0	0	2	0.312667	0	0	1.83837	0.0121088	0.059129	0.015278	0.262606	0.0261526	0.507307	0.844959	0.548383	0.972619
IBSP	0	7	0	0	0	8.07022	0	0	0	0.0121559	0.64261	0.0273791	1	0.125888	0.507307	0.844959	0.6953	1
RASAL3	0	12	0	1	1	6.917	7.59539	7.59539	1.76662	0.012159	0.178275	0.0390501	0.343781	0.071294	0.507307	0.844959	0.782355	1
FAM170A	1	9	0	0	0	5.35723	0	0	0	0.0121627	0.526855	0.0236455	1	0.112188	0.507307	0.844959	0.661277	1
CAMKK2	6	1	0	0	0	0.118698	0	0	0	0.0122468	0.1988	0.0278305	1	0.127509	0.509727	0.844959	0.6953	1
HDGFL2	1	13	0	1	2	4.8305	4.34296	4.34296	5.32089	0.0122831	0.280032	0.0416479	0.0780725	0.0218785	0.510152	0.844959	0.807531	0.904835
AHNAK2	72	96	1	0	0	0.675236	0.157976	0.157976	0	0.0124264	0.0101776	0.00430806	1	0.0277752	0.510835	0.7687	0.297789	1
CCT6A	0	9	0	1	0	7.40071	7.29005	7.29005	0	0.0123666	0.186042	0.0394556	1	0.166999	0.510835	0.844959	0.783584	1
PCDHGB1	7	2	1	0	2	0.177005	1.59411	1.59411	3.85306	0.0123777	0.678744	0.0286537	0.119233	0.0228191	0.510835	0.844959	0.707302	0.918224
RANGAP1	14	5	1	0	0	0.303035	0.643379	0.643379	0	0.0124368	0.648433	0.043989	1	0.181403	0.510835	0.844959	0.820318	1
XAGE3	0	4	0	0	0	10.6168	0	0	0	0.0124702	0.722711	0.0354003	1	0.153674	0.510835	0.844959	0.760455	1
ZNF273	3	0	0	0	3	0	0	0	9.40957	0.0125337	0.366906	0.0364418	0.0170777	0.0052165	0.510835	0.844959	0.760806	0.430571
ITPRIPL2	8	2	0	0	0	0.184697	0	0	0	0.0125342	0.3675	0.0352353	1	0.153122	0.510835	0.844959	0.760455	1
DMRTA2	3	0	0	0	0	0	0	0	0	0.012546	0.599301	0.0415411	1	0.173686	0.510835	0.844959	0.807531	1
FAM184A	2	0	1	1	0	0	2.75282	2.75282	0	0.0125462	0.289993	0.00650705	1	0.0392692	0.510835	0.844959	0.377718	1
REEP4	0	7	0	0	0	8.00108	0	0	0	0.0125656	0.704074	0.0328591	1	0.14509	0.510835	0.844959	0.740668	1
FCN2	0	7	0	0	0	7.99554	0	0	0	0.012599	0.663313	0.0299202	1	0.134917	0.510835	0.844959	0.715525	1
CCDC142	0	10	0	0	0	7.15887	0	0	0	0.0126129	0.612321	0.0246708	1	0.116005	0.510835	0.844959	0.666576	1
ARHGAP8	0	8	0	0	0	7.62862	0	0	0	0.0126445	0.64515	0.0281611	1	0.128691	0.511057	0.844959	0.700874	1
CYLD	6	28	10	4	12	2.61734	11.5854	11.5854	22.4178	0.012754	6.35e-08	4.42e-07	1.37e-05	1.62e-10	0.512424	0.000177335	0.000205705	1.32e-07
SFRP1	0	7	3	0	0	7.96665	62.9227	62.9227	0	0.0127753	0.000148214	0.000316709	1	0.0028686	0.512424	0.0611087	0.0538737	0.300084
TMCC1	0	10	0	0	3	7.13359	0	0	8.201	0.0128046	0.642413	0.0275855	0.0228351	0.00527237	0.512424	0.844959	0.6953	0.43154
WDR24	11	5	0	0	0	0.28697	0	0	0	0.0128365	0.150093	0.0244593	1	0.115221	0.512424	0.844959	0.664545	1
CLBA1	4	0	0	0	1	0	0	0	5.4841	0.0128735	0.400238	0.0372906	0.15053	0.0347051	0.512424	0.844959	0.767303	1
DRAP1	0	6	0	0	2	8.4527	0	0	16.787	0.0128822	0.728474	0.0357158	0.0126565	0.00393351	0.512424	0.844959	0.760455	0.368004
GPR15	0	7	0	0	1	7.94706	0	0	4.9524	0.0128965	0.760864	0.0375063	0.163654	0.0374006	0.512424	0.844959	0.769568	1
KCNU1	3	21	0	0	1	3.2907	0	0	1.55462	0.0128989	0.220663	0.00680831	0.371184	0.0176411	0.512424	0.844959	0.378364	0.823961
EBF4	6	1	0	1	0	0.12045	1.6869	1.6869	0	0.0129511	0.646617	0.0290719	1	0.131928	0.512424	0.844959	0.710882	1
SAMD1	3	0	1	0	0	0	4.34153	4.34153	0	0.0129564	0.260218	0.0131709	1	0.0701975	0.512424	0.844959	0.513504	1
TNRC18	35	35	2	0	4	0.552877	0.625796	0.625796	2.40865	0.0129959	0.488351	0.0449169	0.156603	0.0419022	0.512424	0.844959	0.826589	1
CCDC187	2	0	0	0	0	0	0	0	0	0.0130075	0.361977	0.0390092	1	0.165553	0.512424	0.844959	0.782355	1
CDK19	3	0	0	1	0	0	1.68467	1.68467	0	0.0130445	0.657923	0.0278997	1	0.127757	0.512424	0.844959	0.696141	1
SLC28A1	0	9	0	0	0	7.30418	0	0	0	0.0130583	0.61791	0.0263376	1	0.122121	0.512424	0.844959	0.684507	1
PSTPIP1	7	1	0	0	0	0.126235	0	0	0	0.0131089	0.164202	0.0261793	1	0.121545	0.512424	0.844959	0.684507	1
NARF	0	9	0	1	0	7.28822	7.26047	7.26047	0	0.0131768	0.186828	0.0416713	1	0.1741	0.512424	0.844959	0.807531	1
WNT3A	0	8	0	0	0	7.54846	0	0	0	0.0131899	0.721602	0.0353093	1	0.15337	0.512424	0.844959	0.760455	1
DACT3	7	2	1	0	0	0.179671	2.45108	2.45108	0	0.0132123	0.450766	0.0224594	1	0.107716	0.512424	0.844959	0.650739	1
TAS2R4	0	6	1	0	0	8.38891	29.5106	29.5106	0	0.0132404	0.0409476	0.0154598	1	0.0799197	0.512424	0.844959	0.550866	1
DNAJC30	4	0	0	0	0	0	0	0	0	0.0132632	0.544428	0.042077	1	0.175388	0.512424	0.844959	0.809351	1
SYTL3	8	2	0	0	0	0.187033	0	0	0	0.0132692	0.110319	0.0221854	1	0.106674	0.512424	0.844959	0.649468	1
TRPM6	2	22	2	0	1	3.63367	2.64113	2.64113	0.883746	0.0133001	0.30885	0.0466205	0.497762	0.110538	0.512424	0.844959	0.833629	1
ODF1	0	6	0	0	0	8.3774	0	0	0	0.0133062	0.696994	0.0345577	1	0.150849	0.512424	0.844959	0.758387	1
HOXD12	0	7	0	0	0	7.8822	0	0	0	0.013307	0.776344	0.0395547	1	0.167319	0.512424	0.844959	0.784396	1
DNAJC11	3	0	0	0	2	0	0	0	6.38506	0.0134208	0.290655	0.0357746	0.0602817	0.0153962	0.515791	0.844959	0.760455	0.764649
CNGB1	2	18	0	3	0	3.74669	6.08309	6.08309	0	0.013458	0.036489	0.0228484	1	0.10919	0.516209	0.844959	0.652749	1
KCNA3	0	9	0	0	0	7.23927	0	0	0	0.0135475	0.748839	0.0379222	1	0.162012	0.518173	0.844959	0.772489	1
RARS	1	13	2	0	0	4.7368	5.91804	5.91804	0	0.0135622	0.0915207	0.034916	1	0.152052	0.518173	0.844959	0.760455	1
CDH4	3	18	0	0	0	3.354	0	0	0	0.0136179	0.395929	0.020119	1	0.0987056	0.51895	0.844959	0.625704	1
SLITRK4	1	13	1	0	0	4.73079	4.94425	4.94425	0	0.013649	0.245057	0.0437651	1	0.180703	0.51895	0.844959	0.818163	1
HIST1H3D	1	7	0	0	0	5.71816	0	0	0	0.0137212	0.733832	0.0409222	1	0.171713	0.51895	0.844959	0.803735	1
EIF4A2	0	8	0	1	0	7.47162	7.63057	7.63057	0	0.0137375	0.177419	0.0418846	1	0.174778	0.51895	0.844959	0.807531	1
PON3	1	9	0	0	0	5.21523	0	0	0	0.0137438	0.55741	0.0288829	1	0.131258	0.51895	0.844959	0.709807	1
RPL32	0	5	0	0	0	9.02832	0	0	0	0.0138036	0.78189	0.0418309	1	0.174607	0.51895	0.844959	0.807531	1
CENPH	0	6	0	0	0	8.28817	0	0	0	0.0138298	0.622718	0.0298214	1	0.13457	0.51895	0.844959	0.715525	1
PRR5-ARHGAP8	0	9	0	0	0	7.2025	0	0	0	0.0138335	0.646672	0.0303861	1	0.136548	0.51895	0.844959	0.722806	1
PKMYT1	6	1	0	0	0	0.122592	0	0	0	0.0138453	0.275129	0.0350134	1	0.152379	0.51895	0.844959	0.760455	1
CSNK1G2	0	8	0	0	0	7.45125	0	0	0	0.0138869	0.678383	0.0335752	1	0.147528	0.51895	0.844959	0.746818	1
METTL14	3	0	0	1	0	0	1.47485	1.47485	0	0.0139258	0.737954	0.0325294	1	0.143963	0.51895	0.844959	0.740668	1
RILP	3	0	0	0	0	0	0	0	0	0.0139275	0.4339	0.0418858	1	0.174782	0.51895	0.844959	0.807531	1
TMEM60	0	4	0	0	2	10.2523	0	0	26.6839	0.0138619	0.805268	0.0436079	0.00551493	0.00224449	0.51895	0.847295	0.818163	0.255272
SPDYE1	2	12	0	0	0	4.06468	0	0	0	0.014	0.433077	0.0222645	1	0.106976	0.520607	0.844959	0.650041	1
TMEM209	0	9	0	0	0	7.17833	0	0	0	0.0140251	0.566206	0.0234376	1	0.111408	0.520607	0.844959	0.661277	1
SHISA6	8	2	0	0	0	0.189542	0	0	0	0.0140897	0.289584	0.0356019	1	0.154347	0.522014	0.844959	0.760455	1
HLA-DMA	0	6	0	0	0	8.2406	0	0	0	0.0141186	0.720993	0.0382809	1	0.163184	0.522095	0.844959	0.772954	1
SNAP25	0	6	0	0	0	8.23371	0	0	0	0.014161	0.681453	0.0353693	1	0.15357	0.522173	0.844959	0.760455	1
GORAB	0	8	0	0	0	7.41016	0	0	0	0.0141938	0.629073	0.0299576	1	0.135048	0.522173	0.844959	0.715545	1
AMOTL2	8	3	0	0	0	0.224365	0	0	0	0.0142126	0.133316	0.0263874	1	0.122302	0.522173	0.844959	0.684507	1
TUBA1B	3	0	0	0	0	0	0	0	0	0.0143189	0.465449	0.0437441	1	0.180637	0.522173	0.844959	0.818163	1
FNTB	1	10	0	0	0	5.00168	0	0	0	0.0143781	0.490921	0.0243329	1	0.114752	0.522173	0.844959	0.663878	1
C4orf33	0	5	0	0	0	8.91393	0	0	0	0.0144032	0.672905	0.0359124	1	0.155381	0.522173	0.844959	0.760455	1
CSK	0	8	0	1	0	7.38177	8.47144	8.47144	0	0.0144103	0.159024	0.0415569	1	0.173737	0.522173	0.844959	0.807531	1
TRIOBP	11	51	0	0	1	2.07507	0	0	0.755629	0.0144157	0.0437054	0.00123888	0.532934	0.00549513	0.522173	0.844959	0.143397	0.438758
PTPRC	2	20	0	2	0	3.63607	2.73598	2.73598	0	0.0144601	0.292728	0.0502451	1	0.20052	0.522173	0.844959	0.843301	1
PAK1	0	9	1	1	1	7.12388	12.1784	12.1784	3.22711	0.0144677	0.0352969	0.0245067	0.228317	0.0346115	0.522173	0.844959	0.66491	1
RNF222	0	6	0	0	0	8.18495	0	0	0	0.0144654	0.816529	0.045264	1	0.185367	0.522173	0.851545	0.828301	1
KRT1	11	4	0	1	1	0.272049	0.805726	0.805726	2.77181	0.0143311	0.830496	0.0480378	0.254954	0.066166	0.522173	0.857536	0.837536	1
MTRNR2L1	0	2	0	0	0	19.4252	0	0	0	0.0143915	0.880554	0.0486096	1	0.195602	0.522173	0.893878	0.840135	1
WDR34	3	0	0	0	0	0	0	0	0	0.0145571	0.409563	0.042758	1	0.17754	0.522743	0.844959	0.814182	1
C6orf163	0	7	0	0	0	7.69507	0	0	0	0.014577	0.670149	0.0348469	1	0.151821	0.522743	0.844959	0.760455	1
SPCS2	0	6	0	0	0	8.16527	0	0	0	0.0145904	0.710795	0.0386715	1	0.164456	0.522743	0.844959	0.776686	1
ANO9	7	26	1	0	0	2.5066	0.928607	0.928607	0	0.0145168	0.943752	0.0378395	1	0.161741	0.522743	0.950115	0.771862	1
SCO1	0	7	0	0	0	7.68541	0	0	0	0.0146462	0.678436	0.0357054	1	0.154692	0.523073	0.844959	0.760455	1
DPYD	1	15	0	0	0	4.52836	0	0	0	0.0146712	0.402238	0.0158502	1	0.0815427	0.523073	0.844959	0.556306	1
CEACAM4	0	6	0	0	0	8.14978	0	0	0	0.0146897	0.68335	0.0367349	1	0.158108	0.523073	0.844959	0.763284	1
RPS6KA5	5	1	0	0	0	0.117707	0	0	0	0.0147066	0.191983	0.0331587	1	0.146112	0.523073	0.844959	0.741314	1
PPP5C	3	0	1	1	0	0	4.20494	4.20494	0	0.0147602	0.134791	0.00548217	1	0.0340238	0.524027	0.844959	0.338912	1
SLCO3A1	10	3	0	0	0	0.240686	0	0	0	0.014839	0.218573	0.0324284	1	0.143616	0.525869	0.844959	0.740668	1
ALDH1A3	3	0	0	0	0	0	0	0	0	0.0148959	0.381498	0.0426608	1	0.177233	0.526552	0.844959	0.813384	1
NR1H3	1	11	0	0	0	4.836	0	0	0	0.0149121	0.561351	0.0308186	1	0.138056	0.526552	0.844959	0.728108	1
PGAP3	8	1	0	0	0	0.134883	0	0	0	0.0149392	0.266993	0.0352875	1	0.153297	0.526561	0.844959	0.760455	1
IRAK4	3	0	0	0	0	0	0	0	0	0.0149779	0.307284	0.0399249	1	0.168513	0.526976	0.844959	0.78855	1
OR2T8	4	0	0	0	0	0	0	0	0	0.0150497	0.561935	0.0473516	1	0.191781	0.527707	0.844959	0.837082	1
TEAD2	9	2	0	0	2	0.198378	0	0	7.9107	0.0150687	0.14829	0.0274132	0.0437609	0.009268	0.527707	0.844959	0.6953	0.582899
PQLC2L	0	4	0	0	0	9.9687	0	0	0	0.0150797	0.743831	0.0434274	1	0.179644	0.527707	0.844959	0.816852	1
ABHD10	0	7	0	0	0	7.58946	0	0	0	0.0153541	0.663156	0.0359361	1	0.15546	0.535792	0.844959	0.760455	1
CAPZA1	4	0	1	0	0	0	1.93641	1.93641	0	0.0153655	0.575251	0.0327216	1	0.14462	0.535792	0.844959	0.740668	1
LHFPL3	5	0	0	0	0	0	0	0	0	0.0153943	0.468014	0.0450767	1	0.184787	0.535844	0.844959	0.828301	1
FOXD4L1	3	0	0	0	0	0	0	0	0	0.0154984	0.552349	0.0489611	1	0.196663	0.538327	0.844959	0.840135	1
GLE1	0	10	0	0	0	6.81393	0	0	0	0.0155232	0.554396	0.0242391	1	0.114403	0.538327	0.844959	0.663062	1
FBXO47	0	8	0	0	0	7.23395	0	0	0	0.0155987	0.615315	0.031403	1	0.140084	0.538327	0.844959	0.736124	1
OSTN	0	4	0	1	0	9.8495	22.7241	22.7241	0	0.0156308	0.0546431	0.0201065	1	0.0986569	0.538327	0.844959	0.625704	1
SLC4A2	2	18	0	0	0	3.65093	0	0	0	0.015634	0.391798	0.0198191	1	0.0975319	0.538327	0.844959	0.619331	1
TFEB	6	1	0	0	0	0.126672	0	0	0	0.0156486	0.260175	0.037955	1	0.162119	0.538327	0.844959	0.772489	1
GAD2	0	9	0	0	1	6.98606	0	0	3.05088	0.0156583	0.597378	0.0292493	0.237935	0.0415315	0.538327	0.844959	0.711236	1
PDZD8	1	15	0	0	0	4.46621	0	0	0	0.0157445	0.520586	0.0278101	1	0.127436	0.540339	0.844959	0.6953	1
GCM1	0	8	2	0	0	7.20356	20.5629	20.5629	0	0.0158565	0.0128648	0.0123306	1	0.0665317	0.54323	0.844498	0.504624	1
LIPJ	0	7	0	0	0	7.50615	0	0	0	0.0160005	0.634338	0.0345996	1	0.15099	0.543743	0.844959	0.758387	1
PTGDR2	3	0	0	0	0	0	0	0	0	0.0160065	0.663915	0.0524537	1	0.207078	0.543743	0.844959	0.84871	1
GPR142	0	8	0	1	0	7.18529	14.7943	14.7943	0	0.0160136	0.0874609	0.0323717	1	0.143422	0.543743	0.844959	0.740668	1
BRPF1	9	5	0	1	2	0.282114	0.715772	0.715772	2.92845	0.0160142	0.738425	0.0531908	0.164681	0.0502587	0.543743	0.844959	0.84871	1
COPB2	0	11	0	0	0	6.61536	0	0	0	0.0160194	0.519658	0.0210185	1	0.102199	0.543743	0.844959	0.633561	1
PTCRA	4	0	0	0	0	0	0	0	0	0.0160878	0.444694	0.0466971	1	0.18978	0.543743	0.844959	0.833979	1
SOX8	3	0	0	0	0	0	0	0	0	0.0161278	0.572682	0.0511152	1	0.203115	0.543743	0.844959	0.848326	1
SRBD1	6	2	0	0	0	0.179511	0	0	0	0.0161712	0.116226	0.0290015	1	0.131679	0.543743	0.844959	0.710882	1
HIST1H2BM	1	6	0	0	0	5.86765	0	0	0	0.0161772	0.792897	0.0507161	1	0.201927	0.543743	0.845222	0.845788	1
BHLHA15	0	6	0	0	0	7.94171	0	0	0	0.0161019	0.821109	0.0500674	1	0.199988	0.543743	0.853798	0.841424	1
SPRR2B	0	3	0	0	0	12.0116	0	0	0	0.0160893	0.832646	0.0515761	1	0.204484	0.543743	0.858631	0.848556	1
NFKB2	2	16	2	1	3	3.70658	6.49993	6.49993	5.95278	0.0162091	0.0308042	0.0228987	0.0428829	0.007783	0.543881	0.844959	0.65298	0.528649
CTSC	0	8	0	0	1	7.15208	0	0	3.85306	0.0163039	0.66143	0.0373358	0.199672	0.0439756	0.546124	0.844959	0.767303	1
LRRC7	1	17	2	2	1	4.33672	9.28202	9.28202	1.16243	0.0163596	0.0077698	0.0125401	0.435734	0.0339298	0.547052	0.700747	0.505197	1
CBX7	4	0	0	0	0	0	0	0	0	0.016417	0.400287	0.0458288	1	0.187112	0.548037	0.844959	0.832956	1
SPOCK3	0	8	1	4	2	7.11889	34.0608	34.0608	8.18223	0.0165997	6.74e-05	0.000279556	0.041545	0.000143589	0.549072	0.0366152	0.0488274	0.0312098
TBATA	0	7	0	0	0	7.444	0	0	0	0.0165027	0.660626	0.0381766	1	0.162844	0.549072	0.844959	0.772954	1
HTRA3	3	0	0	0	0	0	0	0	0	0.016575	0.472034	0.0497509	1	0.19904	0.549072	0.844959	0.840135	1
MAN1B1	14	6	0	0	0	0.335731	0	0	0	0.0165983	0.0923593	0.0224021	1	0.107499	0.549072	0.844959	0.650739	1
CRISP2	0	6	0	0	0	7.87142	0	0	0	0.016614	0.647885	0.0378287	1	0.161706	0.549072	0.844959	0.771862	1
NDN	1	9	1	0	0	4.99801	13.0691	13.0691	0	0.0166164	0.0860462	0.0277869	1	0.127353	0.549072	0.844959	0.6953	1
CAP1	3	0	0	1	0	0	1.93172	1.93172	0	0.0168041	0.581763	0.0329591	1	0.145432	0.554338	0.844959	0.740668	1
CDH19	2	16	0	0	1	3.68091	0	0	2.31283	0.0168449	0.37027	0.0197317	0.288997	0.0351659	0.554688	0.844959	0.618575	1
ADM5	0	5	0	0	0	8.49646	0	0	0	0.0168715	0.763382	0.0487929	1	0.196156	0.554688	0.844959	0.840135	1
NOS2	5	25	0	8	0	2.6838	8.67804	8.67804	0	0.016943	0.0001128	0.000392937	1	0.0034743	0.555305	0.0525379	0.0640553	0.340578
OLFML3	3	0	0	0	0	0	0	0	0	0.0169734	0.432681	0.0494938	1	0.198268	0.555305	0.844959	0.840135	1
EIF3J	4	12	0	0	2	3.30477	0	0	13.8055	0.0169983	0.347158	0.0240022	0.0177329	0.00372932	0.555305	0.844959	0.662004	0.354141
PPP1R3A	3	22	2	0	1	3.12774	2.92878	2.92878	1.592	0.0170038	0.248745	0.0555154	0.366034	0.0994919	0.555305	0.844959	0.86079	1
RASEF	2	16	2	0	1	3.67261	4.10466	4.10466	2.41271	0.0170559	0.151338	0.0486853	0.28083	0.0723591	0.556078	0.844959	0.840135	1
SATB2	4	20	0	0	0	2.94134	0	0	0	0.0171321	0.308228	0.0188972	1	0.0938952	0.557022	0.844959	0.608352	1
NOM1	2	16	0	0	0	3.66887	0	0	0	0.0171518	0.435619	0.0262201	1	0.121693	0.557022	0.844959	0.684507	1
OR2L5	1	8	0	0	0	5.15121	0	0	0	0.017203	0.670562	0.0454801	1	0.186036	0.557022	0.844959	0.830703	1
PIK3AP1	5	1	0	0	0	0.123123	0	0	0	0.0172272	0.220189	0.0397612	1	0.167986	0.557022	0.844959	0.787255	1
OR8D1	0	6	0	0	0	7.79786	0	0	0	0.0171703	0.803611	0.0519306	1	0.205533	0.557022	0.846641	0.84871	1
FCGR2A	4	0	0	0	0	0	0	0	0	0.0172979	0.406912	0.0481722	1	0.194277	0.558385	0.844959	0.839131	1
EVC2	13	8	2	1	1	0.358392	1.25683	1.25683	1.36579	0.0173297	0.725858	0.0328974	0.399636	0.0700939	0.558491	0.844959	0.740668	1
OC90	1	10	0	0	0	4.79423	0	0	0	0.0174574	0.504258	0.0305855	1	0.137244	0.559319	0.844959	0.72523	1
PLEKHO1	3	0	0	0	0	0	0	0	0	0.017477	0.408754	0.0498546	1	0.199351	0.559319	0.844959	0.840135	1
SEC23A	2	0	0	0	0	0	0	0	0	0.0174848	0.272837	0.0460012	1	0.187643	0.559319	0.844959	0.832998	1
CLUL1	0	8	1	0	1	7.01415	6.82691	6.82691	3.44474	0.0175737	0.199102	0.0537086	0.217466	0.0636536	0.559319	0.844959	0.851027	1
IPO9	0	11	1	0	0	6.46759	5.11774	5.11774	0	0.0176072	0.26651	0.0590245	1	0.226052	0.559319	0.844959	0.86872	1
WASHC4	0	12	0	0	2	6.35304	0	0	3.04309	0.0176089	0.470623	0.017465	0.157738	0.0189933	0.559319	0.844959	0.584907	0.83952
LILRB1	12	5	0	1	1	0.310076	0.635768	0.635768	2.54675	0.0176217	0.641118	0.0597842	0.270575	0.08289	0.559319	0.844959	0.869264	1
PFDN1	1	5	0	0	0	6.27894	0	0	0	0.0176289	0.624002	0.0444441	1	0.182822	0.559319	0.844959	0.824872	1
SULT1A2	8	1	1	0	1	0.140661	1.43972	1.43972	6.03993	0.0176396	0.741716	0.0463656	0.13889	0.03893	0.559319	0.844959	0.832998	1
C2orf80	0	5	0	1	0	8.38093	9.85325	9.85325	0	0.0176413	0.135522	0.0425565	1	0.176904	0.559319	0.844959	0.812185	1
GCNT1	3	0	0	0	0	0	0	0	0	0.0177013	0.481342	0.0529015	1	0.208396	0.560312	0.844959	0.84871	1
PEX16	0	7	1	0	0	7.29438	9.8435	9.8435	0	0.017787	0.135665	0.0448923	1	0.184215	0.561917	0.844959	0.826589	1
HIST1H2BD	2	7	0	0	1	4.62589	0	0	14.0773	0.0178636	0.763212	0.0547815	0.0656052	0.0238225	0.561917	0.844959	0.857504	0.945266
OR2L2	14	3	1	0	1	0.268277	1.64691	1.64691	5.71188	0.0178879	0.652748	0.0457478	0.145532	0.0400262	0.561917	0.844959	0.832956	1
EEPD1	1	11	0	0	0	4.65089	0	0	0	0.0179057	0.559982	0.0364345	1	0.157114	0.561917	0.844959	0.760806	1
TRIP11	0	14	0	0	0	6.15367	0	0	0	0.0179097	0.469018	0.0170004	1	0.0862687	0.561917	0.844959	0.578367	1
RABEPK	0	7	0	0	0	7.2791	0	0	0	0.0179243	0.656017	0.040736	1	0.171117	0.561917	0.844959	0.801688	1
AP1G1	2	0	0	0	1	0	0	0	2.16443	0.0179692	0.277335	0.0472642	0.302057	0.0749392	0.562421	0.844959	0.837082	1
PDYN	0	6	0	0	0	7.68702	0	0	0	0.0180497	0.764972	0.0514974	1	0.20425	0.562859	0.844959	0.848556	1
IGSF9	0	11	0	0	1	6.42881	0	0	1.5151	0.0180515	0.598609	0.0328358	0.376792	0.066715	0.562859	0.844959	0.740668	1
FZD10	8	2	0	0	0	0.200532	0	0	0	0.0180695	0.372924	0.0483982	1	0.194962	0.562859	0.844959	0.840135	1
CCDC88B	0	12	2	1	2	6.28556	15.8129	15.8129	2.42088	0.0184195	0.00784499	0.0134519	0.201785	0.0187543	0.562893	0.700747	0.518005	0.837584
SLC25A41	0	7	0	0	0	7.252	0	0	0	0.018171	0.686867	0.0443911	1	0.182657	0.562893	0.844959	0.824672	1
PNP	1	8	0	0	0	5.07877	0	0	0	0.0182583	0.568986	0.0391957	1	0.166158	0.562893	0.844959	0.782355	1
ASIC4	7	2	0	0	1	0.193847	0	0	2.68039	0.0182623	0.213926	0.0399475	0.261075	0.0580196	0.562893	0.844959	0.78855	1
OR8H2	4	12	1	0	0	3.26141	6.68586	6.68586	0	0.0182896	0.16065	0.0370957	1	0.159298	0.562893	0.844959	0.765612	1
GBP1	1	11	0	0	0	4.62738	0	0	0	0.01833	0.464264	0.0275112	1	0.126363	0.562893	0.844959	0.6953	1
ITPRID1	0	11	0	0	2	6.40017	0	0	3.36372	0.0183874	0.549975	0.0276944	0.140513	0.0254849	0.562893	0.844959	0.6953	0.969569
ADGRE5	7	2	0	0	0	0.194179	0	0	0	0.0183934	0.177409	0.0371025	1	0.159321	0.562893	0.844959	0.765612	1
ZNF354B	2	14	1	0	0	3.7202	2.33859	2.33859	0	0.0184017	0.494861	0.0619943	1	0.234383	0.562893	0.844959	0.872559	1
TMEM97	2	7	0	0	1	4.59289	0	0	10.1007	0.0184088	0.607218	0.0464569	0.0887753	0.0267698	0.562893	0.844959	0.833629	0.980657
NUDT12	1	10	1	0	1	4.73568	4.43894	4.43894	3.86138	0.018451	0.273845	0.0576402	0.199339	0.0628074	0.562893	0.844959	0.865494	1
OR51D1	0	6	0	0	0	7.63231	0	0	0	0.0185029	0.784726	0.0541642	1	0.212093	0.562893	0.844959	0.854837	1
EDEM1	0	9	0	0	0	6.69551	0	0	0	0.0185388	0.614564	0.0363696	1	0.156899	0.562893	0.844959	0.760806	1
FERD3L	2	8	0	0	0	4.35154	0	0	0	0.018551	0.694459	0.0525489	1	0.207358	0.562893	0.844959	0.84871	1
TLX3	1	9	0	0	0	4.87296	0	0	0	0.0185647	0.716966	0.0519554	1	0.205607	0.562893	0.844959	0.84871	1
ZNF382	1	11	0	0	1	4.614	0	0	3.24468	0.0185762	0.524816	0.0341499	0.227401	0.0454918	0.562893	0.844959	0.750607	1
RHOA	0	5	0	0	0	8.24786	0	0	0	0.0185806	0.751549	0.0522671	1	0.206528	0.562893	0.844959	0.84871	1
ZNF556	2	12	0	0	0	3.84591	0	0	0	0.018614	0.471205	0.032959	1	0.145431	0.562893	0.844959	0.740668	1
NUP205	2	22	0	0	0	3.43401	0	0	0	0.0186177	0.225738	0.0077067	1	0.0452049	0.562893	0.844959	0.410786	1
A1CF	3	16	0	0	1	3.25655	0	0	2.96487	0.0186461	0.295527	0.0177308	0.242931	0.0277714	0.562893	0.844959	0.584907	1
OR1C1	0	6	4	0	1	7.58462	109.495	109.495	5.67561	0.0189088	2.42e-06	1.02e-05	0.146305	2.16e-05	0.565587	0.00278363	0.00364169	0.00621043
U2SURP	0	12	1	0	1	6.25506	3.26746	3.26746	1.73575	0.0187989	0.408887	0.06074	0.347514	0.102545	0.565587	0.844959	0.869264	1
CDH18	1	13	0	0	1	4.43166	0	0	2.2602	0.018805	0.489483	0.0301719	0.293496	0.0507121	0.565587	0.844959	0.718906	1
NPTX1	3	0	0	0	0	0	0	0	0	0.018889	0.498872	0.056466	1	0.218756	0.565587	0.844959	0.862286	1
MFAP2	0	5	0	0	0	8.20479	0	0	0	0.0188972	0.676466	0.046356	1	0.188734	0.565587	0.844959	0.832998	1
CRB1	10	6	0	0	0	0.315587	0	0	0	0.0189013	0.0683794	0.0236737	1	0.112294	0.565587	0.844959	0.661277	1
NEK4	2	0	0	0	0	0	0	0	0	0.0189854	0.299565	0.0505916	1	0.201555	0.56701	0.844959	0.845152	1
SLC25A46	3	0	1	0	1	0	2.5016	2.5016	4.26687	0.0190628	0.455667	0.0310909	0.18439	0.0353233	0.567237	0.844959	0.733656	1
PTPN1	3	0	0	0	1	0	0	0	4.1005	0.0190689	0.320437	0.0494251	0.190243	0.0532832	0.567237	0.844959	0.840135	1
SELL	0	7	0	0	0	7.15344	0	0	0	0.0191012	0.612281	0.0383276	1	0.163336	0.567237	0.844959	0.772954	1
CDRT15	0	5	0	0	0	8.17647	0	0	0	0.0191089	0.723469	0.0512151	1	0.203412	0.567237	0.844959	0.848326	1
AP3M1	3	0	0	0	0	0	0	0	0	0.0191754	0.39126	0.0531357	1	0.209084	0.567932	0.844959	0.84871	1
IPO5	1	15	1	0	0	4.29126	2.17504	2.17504	0	0.0192315	0.544847	0.0607519	1	0.230915	0.567932	0.844959	0.869264	1
STK25	3	0	0	0	0	0	0	0	0	0.0192619	0.376474	0.0526664	1	0.207705	0.567932	0.844959	0.84871	1
LRRFIP2	2	0	0	0	0	0	0	0	0	0.0193353	0.229147	0.0471295	1	0.191103	0.567932	0.844959	0.836987	1
TBL2	0	8	0	0	0	6.83953	0	0	0	0.0193424	0.671544	0.0448693	1	0.184144	0.567932	0.844959	0.826589	1
TATDN2	2	0	0	0	0	0	0	0	0	0.0193498	0.448821	0.0574669	1	0.221624	0.567932	0.844959	0.865494	1
USP34	2	26	0	3	1	3.33874	2.73488	2.73488	0.504037	0.0194129	0.224785	0.0650464	0.620169	0.169847	0.567932	0.844959	0.87985	1
GABRG2	0	8	0	1	0	6.8321	7.23513	7.23513	0	0.019422	0.187506	0.0569687	1	0.220198	0.567932	0.844959	0.862928	1
ACTR10	3	0	0	0	0	0	0	0	0	0.0194227	0.323537	0.0503475	1	0.200826	0.567932	0.844959	0.843301	1
IGSF3	6	27	1	0	1	2.49166	1.14471	1.14471	1.47146	0.0192464	0.901001	0.0557448	0.383189	0.103519	0.567932	0.911862	0.86079	1
NPIPB5	4	1	5	0	0	0.118977	9.43469	9.43469	0	0.019731	0.00110919	8.32e-06	1	0.000105611	0.569455	0.221408	0.00312905	0.0251946
FUCA1	0	8	0	0	1	6.82269	0	0	3.8283	0.0195233	0.644655	0.0422358	0.200667	0.0489076	0.569455	0.844959	0.810064	1
CFAP74	21	16	1	0	0	0.467719	0.295857	0.295857	0	0.01958	0.147818	0.0422797	1	0.176029	0.569455	0.844959	0.810064	1
PEX2	0	6	0	0	0	7.50345	0	0	0	0.0196235	0.707587	0.050304	1	0.200696	0.569455	0.844959	0.843301	1
LRRN2	5	1	0	0	0	0.127885	0	0	0	0.0196365	0.422417	0.0556614	1	0.216438	0.569455	0.844959	0.86079	1
ADAMTS4	1	13	0	0	0	4.39	0	0	0	0.019673	0.537011	0.0367158	1	0.158045	0.569455	0.844959	0.763284	1
CAPN9	0	9	0	0	0	6.59015	0	0	0	0.0197238	0.576858	0.0339689	1	0.148862	0.569455	0.844959	0.749999	1
CEBPA	3	0	0	0	1	0	0	0	4.97999	0.0197278	0.68006	0.063171	0.162916	0.0573903	0.569455	0.844959	0.87394	1
CWH43	0	9	0	0	0	6.58825	0	0	0	0.0197459	0.581854	0.0346202	1	0.151059	0.569455	0.844959	0.758387	1
DMRT1	0	7	0	0	0	7.08157	0	0	0	0.0198136	0.726333	0.0520595	1	0.205914	0.569455	0.844959	0.84871	1
TACSTD2	3	0	0	0	1	0	0	0	5.51796	0.019817	0.667027	0.0631698	0.149765	0.0535531	0.569455	0.844959	0.87394	1
SOCS6	1	11	0	0	0	4.549	0	0	0	0.0198241	0.621771	0.0463134	1	0.188603	0.569455	0.844959	0.832998	1
ENDOD1	0	8	0	0	0	6.78251	0	0	0	0.0199624	0.704023	0.049728	1	0.198971	0.57178	0.844959	0.840135	1
GNAZ	3	0	0	0	0	0	0	0	0	0.0200059	0.538407	0.0605367	1	0.230312	0.57178	0.844959	0.869264	1
ZNF670	0	7	0	0	0	7.06118	0	0	0	0.0200211	0.665563	0.0461902	1	0.188224	0.57178	0.844959	0.832998	1
MAML1	6	2	1	0	0	0.189373	1.60621	1.60621	0	0.0200219	0.675919	0.0433246	1	0.179322	0.57178	0.844959	0.816852	1
PARP1	0	10	0	0	0	6.39669	0	0	0	0.0200628	0.577799	0.0341466	1	0.149463	0.572111	0.844959	0.750607	1
TUSC3	0	7	0	0	0	7.0487	0	0	0	0.0201494	0.638521	0.043385	1	0.179512	0.573438	0.844959	0.816852	1
HELB	0	11	2	0	0	6.25726	11.1123	11.1123	0	0.020168	0.0418483	0.0357622	1	0.154881	0.573438	0.844959	0.760455	1
MAP2K2	0	7	0	0	0	7.03837	0	0	0	0.0202563	0.688233	0.0491788	1	0.19732	0.575114	0.844959	0.840135	1
GRIA4	2	16	2	1	0	3.55446	5.39178	5.39178	0	0.0203763	0.0493544	0.0362782	1	0.156596	0.577075	0.844959	0.760455	1
OR6Q1	0	6	0	0	0	7.41926	0	0	0	0.0203981	0.76502	0.0574554	1	0.221591	0.577075	0.844959	0.865494	1
SLC36A1	3	0	0	0	0	0	0	0	0	0.0204139	0.391344	0.0559828	1	0.217365	0.577075	0.844959	0.86079	1
FHOD3	3	21	0	0	1	3.05301	0	0	1.10155	0.0206076	0.254158	0.0143832	0.447884	0.0389415	0.58171	0.844959	0.537983	1
OPLAH	4	22	1	0	1	2.81169	1.73734	1.73734	1.38698	0.0206996	0.635338	0.0676038	0.396223	0.123749	0.582777	0.844959	0.883577	1
KL	0	10	1	0	0	6.34442	9.78697	9.78697	0	0.0207269	0.136499	0.0527626	1	0.207988	0.582777	0.844959	0.84871	1
ZNF33B	2	0	0	0	1	0	0	0	2.29502	0.0207347	0.364537	0.0575922	0.290504	0.0851682	0.582777	0.844959	0.865494	1
TAAR8	1	8	0	0	0	4.91914	0	0	0	0.020847	0.665183	0.0535933	1	0.210425	0.584114	0.844959	0.851027	1
TCL1A	0	4	0	0	0	8.92462	0	0	0	0.0208774	0.751792	0.05873	1	0.225218	0.584114	0.844959	0.868242	1
REC8	1	11	0	0	1	4.49744	0	0	3.26244	0.020878	0.448891	0.0294202	0.226482	0.0400533	0.584114	0.844959	0.713158	1
KLK5	0	6	0	0	0	7.36647	0	0	0	0.0209017	0.730605	0.0555552	1	0.216131	0.584114	0.844959	0.86079	1
DNAJC3	0	8	1	0	1	6.69056	6.10889	6.10889	3.54023	0.0210095	0.223084	0.064733	0.213025	0.0728626	0.586229	0.844959	0.879764	1
MFAP3	3	0	0	0	0	0	0	0	0	0.0210397	0.471866	0.0608788	1	0.231271	0.586229	0.844959	0.869264	1
PABPC1L	5	1	0	0	0	0.130613	0	0	0	0.0210988	0.28253	0.0515553	1	0.204422	0.586229	0.844959	0.848556	1
GOLGA6L2	1	15	0	0	5	4.20918	0	0	9.82318	0.0211381	0.378819	0.0203035	0.00646028	0.00130367	0.586229	0.844959	0.629037	0.175879
CYB5R1	0	6	0	0	0	7.34147	0	0	0	0.0211453	0.664281	0.0491248	1	0.197157	0.586229	0.844959	0.840135	1
RERG	0	5	0	0	0	7.91593	0	0	0	0.021195	0.689437	0.0528085	1	0.208123	0.586229	0.844959	0.84871	1
PIK3R6	0	9	0	0	0	6.46704	0	0	0	0.0212155	0.618143	0.0417872	1	0.174468	0.586229	0.844959	0.807531	1
MSI1	3	0	0	0	0	0	0	0	0	0.0212573	0.364743	0.0565417	1	0.218973	0.586229	0.844959	0.862768	1
ALLC	0	7	0	0	0	6.94368	0	0	0	0.0212664	0.622049	0.0435999	1	0.180185	0.586229	0.844959	0.818163	1
BBOX1	0	7	0	0	0	6.9427	0	0	0	0.0212771	0.6502	0.0470382	1	0.190824	0.586229	0.844959	0.836509	1
JADE2	2	0	0	0	0	0	0	0	0	0.0214849	0.403447	0.0610013	1	0.231613	0.587519	0.844959	0.869264	1
TMEM184A	3	0	0	0	1	0	0	0	4.3184	0.0214957	0.455321	0.0613254	0.18265	0.0615135	0.587519	0.844959	0.869264	1
TXNIP	0	7	0	0	0	6.92183	0	0	0	0.0215075	0.645756	0.0469724	1	0.190623	0.587519	0.844959	0.836101	1
PUS7L	2	0	0	0	0	0	0	0	0	0.0215465	0.409004	0.061373	1	0.232652	0.587519	0.844959	0.869264	1
SNRNP35	0	6	0	0	1	7.30046	0	0	7.09452	0.0215519	0.680441	0.0518152	0.121126	0.0381026	0.587519	0.844959	0.84871	1
SLC26A5	0	9	0	0	0	6.4385	0	0	0	0.0215787	0.578642	0.0372806	1	0.159907	0.587519	0.844959	0.767303	1
GPKOW	0	8	0	0	0	6.64256	0	0	0	0.0215802	0.641084	0.0459206	1	0.187395	0.587519	0.844959	0.832956	1
GOLGB1	3	28	3	0	0	2.91766	2.72235	2.72235	0	0.0215883	0.207134	0.0693374	1	0.254383	0.587519	0.844959	0.886522	1
PTGDS	0	5	0	0	0	7.86954	0	0	0	0.0215942	0.694492	0.0542358	1	0.212301	0.587519	0.844959	0.854837	1
SUSD1	2	0	0	0	0	0	0	0	0	0.0216346	0.35277	0.0590749	1	0.226195	0.587801	0.844959	0.86872	1
MAPT	1	12	0	0	0	4.37278	0	0	0	0.0216858	0.54119	0.0410488	1	0.172117	0.588295	0.844959	0.804594	1
OR51M1	0	6	1	0	0	7.28446	28.3157	28.3157	0	0.021713	0.0428623	0.0235209	1	0.111721	0.588295	0.844959	0.661277	1
TMEM207	0	4	0	0	0	8.7964	0	0	0	0.0217672	0.735197	0.0595034	1	0.227405	0.588949	0.844959	0.869138	1
TTC21A	1	14	0	0	0	4.22843	0	0	0	0.0219533	0.409569	0.0250178	1	0.117288	0.591414	0.844959	0.668578	1
ANKRD28	0	11	1	1	0	6.12595	9.18877	9.18877	0	0.0219694	0.0591379	0.046726	1	0.189869	0.591414	0.844959	0.833979	1
TNNI3K	1	13	0	0	1	4.28525	0	0	2.13854	0.0220481	0.376984	0.021628	0.304459	0.0396603	0.591414	0.844959	0.638139	1
EIPR1	0	7	0	0	0	6.85938	0	0	0	0.0222138	0.657863	0.0498873	1	0.199449	0.591414	0.844959	0.840135	1
COPS3	0	7	1	0	0	6.8538	6.60077	6.60077	0	0.0222782	0.206118	0.0654233	1	0.243825	0.591414	0.844959	0.87985	1
USP16	0	10	1	0	0	6.22729	5.11183	5.11183	0	0.0223039	0.266816	0.0719678	1	0.261354	0.591414	0.844959	0.89127	1
SV2C	0	9	1	0	0	6.38232	7.11071	7.11071	0	0.022314	0.190905	0.0648063	1	0.242139	0.591414	0.844959	0.879764	1
DOK5	2	10	0	0	0	3.88752	0	0	0	0.0223298	0.430322	0.0352631	1	0.153215	0.591414	0.844959	0.760455	1
DUSP1	0	7	0	0	0	6.84627	0	0	0	0.0223654	0.725234	0.0579592	1	0.223028	0.591414	0.844959	0.865494	1
ELAVL2	1	9	0	0	0	4.66568	0	0	0	0.0223686	0.546141	0.0441048	1	0.181764	0.591414	0.844959	0.821693	1
SARNP	0	5	0	0	0	7.78182	0	0	0	0.022374	0.630475	0.0486946	1	0.195859	0.591414	0.844959	0.840135	1
RGL1	2	0	0	0	0	0	0	0	0	0.0224161	0.341967	0.0602555	1	0.229523	0.591414	0.844959	0.869264	1
IL3RA	0	7	0	0	1	6.84027	0	0	4.7172	0.0224352	0.650707	0.0494602	0.17022	0.0486394	0.591414	0.844959	0.840135	1
TM6SF2	3	0	0	0	0	0	0	0	0	0.0224412	0.42262	0.0621072	1	0.234697	0.591414	0.844959	0.872559	1
TCHH	15	65	0	0	10	1.82314	0	0	9.1966	0.0224525	0.0131633	0.000432462	0.00294216	1.85e-05	0.591414	0.844959	0.0687791	0.00549643
SEMA4C	2	15	0	0	0	3.53091	0	0	0	0.0224959	0.416274	0.0319671	1	0.142031	0.591414	0.844959	0.738603	1
TSPAN19	0	5	0	0	0	7.76777	0	0	0	0.0225019	0.638028	0.0498566	1	0.199357	0.591414	0.844959	0.840135	1
BAG3	1	11	0	0	0	4.42313	0	0	0	0.0225041	0.556999	0.0447254	1	0.183697	0.591414	0.844959	0.826589	1
PKHD1	7	40	0	1	1	2.24488	0.535452	0.535452	0.438728	0.0225129	0.522978	0.023142	0.648198	0.0779981	0.591414	0.844959	0.657045	1
WFDC6	0	3	0	0	0	10.5062	0	0	0	0.0225234	0.798099	0.0672157	1	0.248688	0.591414	0.845332	0.883577	1
HSBP1	0	3	0	0	0	10.548	0	0	0	0.0223032	0.80348	0.0669893	1	0.248076	0.591414	0.846624	0.883577	1
CCND1	14	25	0	1	0	2.07461	1.17135	1.17135	0	0.0224444	0.881011	0.0718074	1	0.260931	0.591414	0.894175	0.890739	1
ZNF774	8	2	0	0	0	0.211259	0	0	0	0.0225792	0.177213	0.0424958	1	0.176712	0.592084	0.844959	0.811819	1
RFX7	6	3	1	0	1	0.227831	1.01965	1.01965	1.31072	0.0226936	0.985503	0.0615089	0.408793	0.117754	0.594286	0.987244	0.869264	1
GSTA1	0	5	0	0	0	7.73784	0	0	0	0.0227775	0.713671	0.0589456	1	0.225829	0.595604	0.844959	0.86872	1
MCU	3	0	0	0	1	0	0	0	5.07903	0.0228169	0.370703	0.0602759	0.160324	0.0544973	0.595604	0.844959	0.869264	1
DCST1	0	9	2	0	0	6.34166	14.2279	14.2279	0	0.0228634	0.0263109	0.0275709	1	0.126578	0.595604	0.844959	0.6953	1
POU2F3	0	7	1	1	0	6.80342	14.1608	14.1608	0	0.0228691	0.0265493	0.026394	1	0.122326	0.595604	0.844959	0.684507	1
LMO4	1	6	0	0	0	5.34465	0	0	0	0.0229168	0.677455	0.0604079	1	0.229951	0.595604	0.844959	0.869264	1
MTFR2	0	7	0	0	0	6.7986	0	0	0	0.0229266	0.635223	0.0484802	1	0.19521	0.595604	0.844959	0.840135	1
LCN1	15	2	0	0	0	0.23975	0	0	0	0.0230988	0.195036	0.040449	1	0.170198	0.596598	0.844959	0.796841	1
LRG1	1	8	0	0	0	4.7939	0	0	0	0.0231641	0.655148	0.0579337	1	0.222955	0.596598	0.844959	0.865494	1
GPCPD1	2	0	0	0	2	0	0	0	5.31298	0.0231814	0.311305	0.0601602	0.078233	0.0299278	0.596598	0.844959	0.869264	1
GPR174	0	6	0	0	0	7.13796	0	0	0	0.0232548	0.712167	0.0591522	1	0.226413	0.596598	0.844959	0.86872	1
RAVER2	2	0	0	0	0	0	0	0	0	0.0232697	0.348933	0.0624924	1	0.235766	0.596598	0.844959	0.872559	1
GRB14	0	8	0	1	2	6.50612	6.65709	6.65709	6.60931	0.0232995	0.204328	0.0683274	0.0573164	0.0256227	0.596598	0.844959	0.884225	0.969569
OR51F2	0	6	0	0	0	7.13376	0	0	0	0.0233008	0.758924	0.0641052	1	0.240217	0.596598	0.844959	0.878603	1
ALDH1A1	1	10	0	0	0	4.49109	0	0	0	0.0233165	0.471876	0.0361574	1	0.156196	0.596598	0.844959	0.760455	1
SUCNR1	0	6	0	0	1	7.1317	0	0	5.33677	0.0233234	0.722543	0.0604413	0.15395	0.0528262	0.596598	0.844959	0.869264	1
NUGGC	2	0	0	1	3	0	1.98559	1.98559	6.72955	0.0233553	0.575509	0.039885	0.033963	0.0103008	0.596598	0.844959	0.78855	0.618113
SLC22A18AS	0	6	0	0	0	7.12517	0	0	0	0.0233953	0.752982	0.0637554	1	0.239255	0.596598	0.844959	0.875831	1
GPR31	0	6	0	0	0	7.12371	0	0	0	0.0234113	0.787621	0.067019	1	0.248157	0.596598	0.844959	0.883577	1
ENO3	6	1	0	0	0	0.141653	0	0	0	0.0234119	0.270237	0.0537275	1	0.210818	0.596598	0.844959	0.851027	1
NPIPB11	0	11	0	0	0	6.02825	0	0	0	0.0234223	0.644372	0.0486331	1	0.195673	0.596598	0.844959	0.840135	1
CLSTN3	6	2	0	1	0	0.196867	1.20611	1.20611	0	0.0232966	0.86394	0.0595096	1	0.227423	0.596598	0.880091	0.869138	1
CCR5	0	6	0	0	0	7.11455	0	0	0	0.0235126	0.728716	0.0615444	1	0.23313	0.5981	0.844959	0.869264	1
LPAR3	2	10	0	0	1	3.84011	0	0	5.05033	0.0236397	0.634587	0.0594779	0.161067	0.0541082	0.5981	0.844959	0.869138	1
ZIK1	1	10	0	1	0	4.47575	5.24557	5.24557	0	0.0236649	0.230432	0.0663059	1	0.246225	0.5981	0.844959	0.881511	1
PARD6G	6	1	0	0	2	0.14221	0	0	9.48445	0.0237351	0.44144	0.0653193	0.0329454	0.015368	0.5981	0.844959	0.87985	0.764649
DOK7	1	10	0	0	0	4.47242	0	0	0	0.0237414	0.598975	0.0523647	1	0.206816	0.5981	0.844959	0.84871	1
BAG2	0	5	0	0	0	7.63535	0	0	0	0.0237519	0.744766	0.0643988	1	0.241023	0.5981	0.844959	0.878603	1
SGK1	1	10	0	0	0	4.47023	0	0	0	0.0237917	0.483319	0.0383214	1	0.163316	0.5981	0.844959	0.772954	1
PUM2	1	15	0	0	0	4.10697	0	0	0	0.0237926	0.367139	0.0214833	1	0.103989	0.5981	0.844959	0.636358	1
HSP90AA1	6	2	0	0	2	0.198015	0	0	4.18203	0.0238248	0.172057	0.0466065	0.107548	0.0315575	0.5981	0.844959	0.833629	1
GGA3	1	11	0	0	0	4.36604	0	0	0	0.0238457	0.501053	0.0401801	1	0.169334	0.5981	0.844959	0.792341	1
NISCH	6	27	0	0	0	2.41862	0	0	0	0.0238482	0.220304	0.0182906	1	0.0914781	0.5981	0.844959	0.594354	1
GTSF1L	0	4	0	0	0	8.52093	0	0	0	0.023843	0.795089	0.0697106	1	0.255378	0.5981	0.845332	0.887187	1
DACH2	5	1	0	0	1	0.135524	0	0	2.9797	0.0238816	0.263244	0.0555535	0.242055	0.0713902	0.598172	0.844959	0.86079	1
WDR64	1	14	0	2	2	4.15261	4.24051	4.24051	3.30465	0.0239136	0.162336	0.0700837	0.143465	0.0563029	0.598206	0.844959	0.887376	1
ZBTB7C	7	2	0	0	4	0.207385	0	0	11.5343	0.0240852	0.379437	0.0628561	0.00610005	0.00339959	0.601237	0.844959	0.87394	0.337578
SULT1C2	0	6	0	0	0	7.05695	0	0	0	0.0241615	0.654132	0.0542015	1	0.212201	0.601237	0.844959	0.854837	1
VSTM2B	3	0	0	0	0	0	0	0	0	0.0241644	0.553922	0.0716125	1	0.260418	0.601237	0.844959	0.890686	1
RGS21	0	4	0	0	0	8.47809	0	0	0	0.0241874	0.723023	0.0641412	1	0.240316	0.601237	0.844959	0.878603	1
MAGED2	2	0	0	0	0	0	0	0	0	0.0241884	0.388406	0.0665565	1	0.246905	0.601237	0.844959	0.881511	1
UNC79	16	15	1	1	2	0.449294	0.549171	0.549171	1.34524	0.024364	0.385608	0.0776652	0.339372	0.122193	0.603189	0.844959	0.902519	1
AC131160.1	1	9	0	0	0	4.5717	0	0	0	0.0243682	0.494756	0.041264	1	0.172804	0.603189	0.844959	0.806401	1
AHCTF1	1	18	2	0	2	3.97101	3.50158	3.50158	1.55327	0.0244243	0.220965	0.0780633	0.303232	0.112285	0.603189	0.844959	0.903072	1
MTG2	0	7	0	0	0	6.67756	0	0	0	0.0244248	0.700991	0.0598899	1	0.228495	0.603189	0.844959	0.869264	1
MLF1	0	6	0	0	0	7.03355	0	0	0	0.024431	0.597319	0.0471506	1	0.191168	0.603189	0.844959	0.836987	1
MDN1	6	40	3	0	2	2.30552	1.40963	1.40963	0.638849	0.0245075	0.626767	0.0685477	0.531419	0.157091	0.603189	0.844959	0.884225	1
NEUROG2	3	0	0	0	0	0	0	0	0	0.0245126	0.608221	0.0742469	1	0.267316	0.603189	0.844959	0.897843	1
PRR5L	3	0	0	0	0	0	0	0	0	0.0245136	0.435525	0.0674967	1	0.249446	0.603189	0.844959	0.883577	1
TMEM35B	1	5	0	0	0	5.69336	0	0	0	0.0246243	0.725414	0.0690501	1	0.253616	0.604302	0.844959	0.884583	1
PREP	2	0	1	0	0	0	2.28147	2.28147	0	0.0246431	0.506476	0.0381067	1	0.162615	0.604302	0.844959	0.772954	1
NXPH1	1	7	0	0	0	4.93402	0	0	0	0.0246956	0.637013	0.059972	1	0.228726	0.604302	0.844959	0.869264	1
IBA57	0	7	0	0	0	6.65239	0	0	0	0.0247502	0.732133	0.064282	1	0.240703	0.604302	0.844959	0.878603	1
MSANTD4	3	0	0	0	0	0	0	0	0	0.0247822	0.35347	0.063434	1	0.23837	0.604302	0.844959	0.875721	1
TMEM59L	3	0	0	1	0	0	3.05276	3.05276	0	0.0247866	0.374162	0.034972	1	0.15224	0.604302	0.844959	0.760455	1
OR6C4	1	7	0	0	0	4.92856	0	0	0	0.0248008	0.707353	0.0670403	1	0.248214	0.604302	0.844959	0.883577	1
TRIM56	0	9	0	0	0	6.20607	0	0	0	0.024806	0.722896	0.0625229	1	0.23585	0.604302	0.844959	0.872559	1
SLC35F6	3	0	0	0	0	0	0	0	0	0.0248794	0.504711	0.071506	1	0.260137	0.605336	0.844959	0.890686	1
GPR65	0	6	0	0	0	6.98768	0	0	0	0.0249694	0.727217	0.0647807	1	0.242069	0.60548	0.844959	0.879764	1
KBTBD2	2	0	0	0	0	0	0	0	0	0.0249778	0.39623	0.068725	1	0.252746	0.60548	0.844959	0.884583	1
AL162417.1	2	15	2	1	1	3.45885	7.48664	7.48664	1.8132	0.0250266	0.0213072	0.0234613	0.338301	0.0463219	0.60548	0.844959	0.661277	1
SIGLEC7	2	11	0	0	2	3.69671	0	0	7.64025	0.0251065	0.463161	0.0430022	0.0461493	0.014333	0.60548	0.844959	0.816708	0.737885
SPDYE3	5	1	0	0	0	0.137589	0	0	0	0.0251087	0.197187	0.0515042	1	0.204271	0.60548	0.844959	0.848556	1
INPP5E	2	13	0	0	0	3.55646	0	0	0	0.0251108	0.505348	0.0474818	1	0.192178	0.60548	0.844959	0.837082	1
SURF2	0	6	1	0	0	6.97446	11.476	11.476	0	0.0251271	0.115125	0.0526418	1	0.207632	0.60548	0.844959	0.84871	1
HIPK1	9	5	1	0	0	0.308208	0.641452	0.641452	0	0.0251726	0.652605	0.0811326	1	0.284911	0.60548	0.844959	0.910566	1
RAB23	0	5	0	0	0	7.49096	0	0	0	0.02521	0.660262	0.0581645	1	0.223612	0.60548	0.844959	0.865656	1
MS4A18	3	0	0	1	0	0	3.22355	3.22355	0	0.0252258	0.354131	0.0341065	1	0.149327	0.60548	0.844959	0.750607	1
SPATA31E1	6	28	1	0	0	2.38809	1.23248	1.23248	0	0.025224	0.848824	0.0743078	1	0.267474	0.60548	0.868901	0.897843	1
DNMT3A	1	13	2	3	3	4.15672	16.4835	16.4835	5.87454	0.025384	0.000379425	0.00137654	0.0439484	0.000648096	0.606279	0.106033	0.152135	0.100619
CRY1	2	0	2	2	0	0	7.72728	7.72728	0	0.0254074	0.00921923	0.000197347	1	0.00188082	0.606279	0.739054	0.0360794	0.222986
MLLT3	12	5	0	1	2	0.331173	0.745774	0.745774	6.28407	0.025399	0.76803	0.0813941	0.0616931	0.0316052	0.606279	0.844959	0.911931	1
FAM171B	6	2	0	0	0	0.201365	0	0	0	0.0254086	0.190538	0.0512152	1	0.203413	0.606279	0.844959	0.848326	1
LRRC18	1	7	0	0	0	4.89699	0	0	0	0.0254192	0.740474	0.0713696	1	0.259777	0.606279	0.844959	0.890686	1
TSTA3	0	6	1	0	0	6.94483	10.7131	10.7131	0	0.0254849	0.123942	0.0556334	1	0.216357	0.606279	0.844959	0.86079	1
BORCS8	0	4	0	0	0	8.32158	0	0	0	0.0254993	0.75686	0.0705868	1	0.257706	0.606279	0.844959	0.890276	1
TRIM77	0	7	1	0	2	6.5929	9.14263	9.14263	7.92824	0.0255386	0.14673	0.0624034	0.0436124	0.0187966	0.606279	0.844959	0.872559	0.837584
KRT40	0	7	0	0	0	6.59116	0	0	0	0.0255621	0.644967	0.0549822	1	0.214472	0.606279	0.844959	0.859762	1
MMP13	3	14	1	0	0	3.16204	2.17321	2.17321	0	0.025569	0.521412	0.0826847	1	0.288795	0.606279	0.844959	0.916938	1
CDR2	6	1	0	0	0	0.14549	0	0	0	0.0256893	0.249622	0.0560641	1	0.217599	0.607546	0.844959	0.86079	1
LECT2	0	4	0	0	0	8.29591	0	0	0	0.0257228	0.737132	0.0691987	1	0.254013	0.607546	0.844959	0.885327	1
KIAA0040	0	4	0	0	2	8.29424	0	0	23.2184	0.0257374	0.814598	0.0760787	0.00710545	0.00460724	0.607546	0.850466	0.900808	0.401861
IVL	7	19	1	0	1	2.44514	0.799615	0.799615	3.05088	0.0257466	0.828058	0.0583617	0.237935	0.0732759	0.607546	0.856344	0.866216	1
TCTE1	1	10	0	0	0	4.38665	0	0	0	0.0258032	0.597163	0.0562775	1	0.218214	0.608147	0.844959	0.86079	1
VSTM1	0	5	2	0	0	7.4179	21.6868	21.6868	0	0.0259884	0.0115789	0.0139655	1	0.0736146	0.610356	0.797555	0.528421	1
RNLS	3	0	0	0	0	0	0	0	0	0.0259798	0.400642	0.0688909	1	0.25319	0.610356	0.844959	0.884583	1
TRIM23	2	0	0	0	0	0	0	0	0	0.026003	0.332191	0.0673501	1	0.249051	0.610356	0.844959	0.883577	1
OR5D18	1	7	0	0	0	4.86705	0	0	0	0.0260217	0.725459	0.0715762	1	0.260322	0.610356	0.844959	0.890686	1
NR2F1	0	7	0	0	0	6.55512	0	0	0	0.0260542	0.720352	0.0659012	1	0.245126	0.610385	0.844959	0.879972	1
SNX14	0	10	0	0	0	5.97831	0	0	0	0.0261088	0.497834	0.0315852	1	0.140714	0.610933	0.844959	0.736124	1
VANGL2	0	8	1	0	0	6.30303	10.079	10.079	0	0.0261488	0.132291	0.0609336	1	0.231424	0.611137	0.844959	0.869264	1
ANKRD13D	1	11	0	0	0	4.27264	0	0	0	0.0262287	0.509591	0.0451451	1	0.184999	0.611743	0.844959	0.828301	1
COL1A1	8	5	0	1	2	0.300784	0.547856	0.547856	2.44071	0.0262583	0.53595	0.0846302	0.200107	0.0860024	0.611743	0.844959	0.922207	1
ANKRD13B	2	0	1	0	0	0	3.16219	3.16219	0	0.0262702	0.369234	0.0315552	1	0.140611	0.611743	0.844959	0.736124	1
ALPG	11	4	0	0	0	0.305294	0	0	0	0.0262997	0.168699	0.0457083	1	0.18674	0.611743	0.844959	0.832956	1
AURKC	0	6	0	0	0	6.8715	0	0	0	0.0263957	0.6913	0.063684	1	0.239058	0.612472	0.844959	0.875831	1
CAND2	1	13	0	0	0	4.11938	0	0	0	0.0264505	0.532107	0.0478267	1	0.193228	0.612472	0.844959	0.837082	1
SFXN4	3	0	2	0	0	0	3.47619	3.47619	0	0.026495	0.187362	0.0152326	1	0.0789707	0.612472	0.844959	0.548383	1
OR4C13	1	7	0	0	0	4.84126	0	0	0	0.0265536	0.701554	0.0706656	1	0.257915	0.612472	0.844959	0.890686	1
SFXN1	3	0	0	0	0	0	0	0	0	0.0266052	0.364945	0.067994	1	0.250785	0.612472	0.844959	0.883577	1
KY	0	8	0	1	0	6.27154	7.17358	7.17358	0	0.0266244	0.189173	0.0737608	1	0.26605	0.612472	0.844959	0.895672	1
PROS1	0	9	0	0	0	6.08663	0	0	0	0.0266686	0.555685	0.0420631	1	0.175344	0.612472	0.844959	0.809351	1
RTN4RL1	0	7	0	0	0	6.50967	0	0	0	0.0266901	0.777957	0.0738991	1	0.26641	0.612472	0.844959	0.895672	1
SLC25A22	3	0	1	0	0	0	3.6326	3.6326	0	0.0267323	0.313374	0.0328815	1	0.145167	0.612472	0.844959	0.740668	1
FAM155A	1	9	0	0	4	4.46995	0	0	15.5801	0.0267557	0.55361	0.0530322	0.00254225	0.00133629	0.612472	0.844959	0.84871	0.179044
TANC1	3	21	1	0	0	2.92077	1.52981	1.52981	0	0.0267865	0.715375	0.0798224	1	0.281609	0.612472	0.844959	0.907821	1
ALKBH1	0	7	0	0	0	6.50177	0	0	0	0.0268025	0.676353	0.0618481	1	0.233976	0.612472	0.844959	0.872559	1
TSPAN4	1	7	0	0	0	4.8291	0	0	0	0.0268086	0.598943	0.0601298	1	0.22917	0.612472	0.844959	0.869264	1
VILL	1	12	1	0	0	4.17131	3.45825	3.45825	0	0.0268474	0.352002	0.0847804	1	0.293992	0.612472	0.844959	0.922207	1
SYT12	6	1	0	0	0	0.147384	0	0	0	0.0268572	0.337496	0.0657121	1	0.244612	0.612472	0.844959	0.87985	1
ZC3H12C	7	3	0	0	1	0.248734	0	0	2.02013	0.0268703	0.149997	0.0477441	0.315953	0.0783517	0.612472	0.844959	0.837082	1
PPIP5K2	0	12	0	0	2	5.72667	0	0	2.79565	0.0268984	0.473459	0.027686	0.17332	0.03042	0.612472	0.844959	0.6953	1
ZSCAN10	6	2	0	0	0	0.20446	0	0	0	0.0269268	0.317072	0.0656785	1	0.24452	0.612472	0.844959	0.87985	1
ADAM2	0	9	0	0	0	6.07079	0	0	0	0.026927	0.536643	0.0394192	1	0.166881	0.612472	0.844959	0.783584	1
NCCRP1	0	6	0	0	0	6.82283	0	0	0	0.027021	0.695493	0.0655853	1	0.244266	0.612472	0.844959	0.87985	1
ZBP1	0	7	0	0	0	6.48614	0	0	0	0.0270262	0.661247	0.0602084	1	0.229391	0.612472	0.844959	0.869264	1
SH3D19	1	14	1	0	1	4.04001	2.52311	2.52311	1.70593	0.0271718	0.476054	0.0863627	0.351197	0.136353	0.612472	0.844959	0.92268	1
ZNF37A	1	10	0	0	0	4.33347	0	0	0	0.0271784	0.492728	0.0448125	1	0.183967	0.612472	0.844959	0.826589	1
BAK1	0	5	0	0	0	7.30767	0	0	0	0.0272173	0.708059	0.068445	1	0.251996	0.612472	0.844959	0.884225	1
BCAR1	0	9	0	0	0	6.05035	0	0	0	0.0272644	0.679477	0.0621442	1	0.234799	0.612472	0.844959	0.872559	1
GPR85	3	0	0	0	0	0	0	0	0	0.0273057	0.548489	0.0791856	1	0.279997	0.612472	0.844959	0.906395	1
TCHHL1	1	13	1	0	0	4.09051	3.58562	3.58562	0	0.027307	0.339628	0.0856146	1	0.296047	0.612472	0.844959	0.922207	1
NFE2L2	2	0	0	0	0	0	0	0	0	0.0273537	0.433099	0.0759364	1	0.27169	0.612472	0.844959	0.900808	1
USP41	3	0	0	0	0	0	0	0	0	0.0273795	0.307949	0.0653294	1	0.243568	0.612472	0.844959	0.87985	1
HOXB1	3	0	0	0	0	0	0	0	0	0.0274037	0.481779	0.0764578	1	0.273032	0.612472	0.844959	0.900808	1
ZNF205	5	1	0	0	0	0.14132	0	0	0	0.0274123	0.359629	0.0697719	1	0.255541	0.612472	0.844959	0.887187	1
MSTO1	1	10	0	0	1	4.32433	0	0	3.13103	0.0274226	0.499529	0.0461621	0.233462	0.0596008	0.612472	0.844959	0.832998	1
LSM2	0	3	0	0	0	9.69454	0	0	0	0.0274362	0.745887	0.0753534	1	0.270185	0.612472	0.844959	0.900437	1
AGO2	9	4	0	0	1	0.293752	0	0	2.07886	0.0274412	0.128873	0.0433099	0.310144	0.0713269	0.612472	0.844959	0.816852	1
KCNK18	5	14	0	0	0	2.77321	0	0	0	0.0274493	0.413452	0.0477509	1	0.192998	0.612472	0.844959	0.837082	1
NLRP5	2	16	1	0	2	3.35807	2.424	2.424	2.97722	0.0274582	0.478371	0.0879589	0.161672	0.0747013	0.612472	0.844959	0.924428	1
PSG1	1	9	0	0	0	4.43552	0	0	0	0.0276207	0.522674	0.0503515	1	0.200838	0.614452	0.844959	0.843301	1
ZMAT4	0	5	0	0	0	7.26909	0	0	0	0.0276637	0.683037	0.0662881	1	0.246177	0.614452	0.844959	0.881511	1
CRHBP	0	6	0	0	0	6.77347	0	0	0	0.0276727	0.675504	0.0643292	1	0.240832	0.614452	0.844959	0.878603	1
TNR	9	5	2	0	1	0.313982	1.19441	1.19441	1.31554	0.0275912	0.821986	0.0601929	0.407974	0.115584	0.614452	0.853875	0.869264	1
ALDH3A1	0	7	0	0	0	6.43475	0	0	0	0.0277772	0.679021	0.064265	1	0.240656	0.616074	0.844959	0.878603	1
HECA	2	0	0	0	0	0	0	0	0	0.0278908	0.5723	0.0827936	1	0.289066	0.617854	0.844959	0.917092	1
NEIL1	0	7	0	0	0	6.42511	0	0	0	0.0279206	0.65479	0.0610856	1	0.231849	0.617854	0.844959	0.869264	1
SLC6A9	0	8	0	0	0	6.18604	0	0	0	0.0279653	0.651847	0.060044	1	0.228928	0.617906	0.844959	0.869264	1
DCN	1	8	0	1	0	4.57272	5.27743	5.27743	0	0.0279868	0.22898	0.074406	1	0.267729	0.617906	0.844959	0.897942	1
GADD45GIP1	3	0	0	0	0	0	0	0	0	0.0280444	0.464765	0.0770709	1	0.274606	0.617906	0.844959	0.901172	1
REEP6	1	6	0	0	0	5.05361	0	0	0	0.0280493	0.636018	0.067783	1	0.250217	0.617906	0.844959	0.883577	1
SNRPA	3	0	0	0	0	0	0	0	0	0.0281364	0.525483	0.0802227	1	0.28262	0.619127	0.844959	0.907845	1
SASH1	2	16	3	4	5	3.33524	16.5504	16.5504	7.16273	0.0284329	2.2e-05	0.000114759	0.0159663	2.6e-05	0.619884	0.0148675	0.0241389	0.0072761
HDAC10	0	8	0	0	0	6.1672	0	0	0	0.028271	0.618979	0.0555494	1	0.216114	0.619884	0.844959	0.86079	1
GAA	2	14	2	0	0	3.42027	5.97842	5.97842	0	0.0282815	0.0773908	0.0495453	1	0.198422	0.619884	0.844959	0.840135	1
EPHA5	3	19	2	1	0	2.93481	4.49557	4.49557	0	0.0283732	0.06674	0.0509185	1	0.20253	0.619884	0.844959	0.847718	1
TMEM217	4	0	0	0	0	0	0	0	0	0.0285482	0.492808	0.0784338	1	0.278087	0.619884	0.844959	0.903072	1
ZNF672	0	8	0	0	1	6.14635	0	0	3.94662	0.0286133	0.720787	0.0712409	0.195998	0.0736042	0.619884	0.844959	0.890686	1
BFSP2	0	7	1	0	0	6.37788	9.0983	9.0983	0	0.0286357	0.147486	0.068435	1	0.251969	0.619884	0.844959	0.884225	1
KRTAP4-16	0	5	0	0	0	7.18542	0	0	0	0.0286621	0.783896	0.0802349	1	0.282651	0.619884	0.844959	0.907845	1
TMEM26	1	8	1	0	0	4.54341	5.59986	5.59986	0	0.0287056	0.215191	0.0737474	1	0.266015	0.619884	0.844959	0.895672	1
B4GALT4	3	0	0	0	0	0	0	0	0	0.0287098	0.41091	0.0754445	1	0.27042	0.619884	0.844959	0.900437	1
COPS5	0	6	0	0	0	6.6976	0	0	0	0.0287103	0.630538	0.059928	1	0.228602	0.619884	0.844959	0.869264	1
PRPH	5	1	0	0	0	0.143353	0	0	0	0.0287135	0.313607	0.0689714	1	0.253405	0.619884	0.844959	0.884583	1
ARHGAP40	5	1	0	0	0	0.143463	0	0	0	0.0287852	0.242939	0.0625711	1	0.235984	0.619884	0.844959	0.872559	1
PODNL1	0	8	0	1	0	6.1354	13.1733	13.1733	0	0.028795	0.0992044	0.0552117	1	0.215137	0.619884	0.844959	0.86079	1
UBXN2A	0	5	0	0	0	7.17268	0	0	0	0.0288178	0.690325	0.0697332	1	0.255438	0.619884	0.844959	0.887187	1
SYK	0	8	0	0	1	6.13313	0	0	2.81103	0.0288328	0.612809	0.0555848	0.252415	0.0738918	0.619884	0.844959	0.86079	1
PRAG1	4	21	0	0	2	2.68432	0	0	2.54132	0.0288571	0.377698	0.0410756	0.191907	0.0460592	0.619884	0.844959	0.804594	1
EXD3	0	9	0	0	0	5.95552	0	0	0	0.0288922	0.622949	0.0566733	1	0.219351	0.619884	0.844959	0.862928	1
FSTL1	0	6	0	0	0	6.68274	0	0	0	0.0289187	0.642303	0.0621042	1	0.234688	0.619884	0.844959	0.872559	1
C8B	0	8	0	0	0	6.1256	0	0	0	0.0289586	0.586474	0.0514914	1	0.204233	0.619884	0.844959	0.848556	1
CRK	3	0	0	0	0	0	0	0	0	0.0289631	0.460482	0.0789266	1	0.27934	0.619884	0.844959	0.905231	1
ZNF428	0	5	0	0	1	7.15967	0	0	9.45935	0.0289779	0.759313	0.0784431	0.0941381	0.0436303	0.619884	0.844959	0.903072	1
USP50	3	0	1	0	0	0	2.57657	2.57657	0	0.0289889	0.442741	0.0467679	1	0.189997	0.619884	0.844959	0.833979	1
MAPK15	2	12	0	0	0	3.51252	0	0	0	0.0290161	0.438458	0.0451855	1	0.185124	0.619884	0.844959	0.828301	1
FEV	3	0	0	0	0	0	0	0	0	0.0290517	0.610557	0.0858419	1	0.296605	0.619884	0.844959	0.922207	1
NTM	0	6	0	0	0	6.67296	0	0	0	0.0290568	0.687453	0.0689088	1	0.253238	0.619884	0.844959	0.884583	1
GUSB	0	8	0	0	0	6.11745	0	0	0	0.0290957	0.613789	0.0562182	1	0.218043	0.619884	0.844959	0.86079	1
MSANTD2	5	1	0	0	0	0.144049	0	0	0	0.0291669	0.312399	0.069757	1	0.255502	0.619884	0.844959	0.887187	1
TMTC2	1	12	1	1	1	4.09377	7.47189	7.47189	2.13598	0.0291693	0.0599099	0.0479262	0.304698	0.0763229	0.619884	0.844959	0.837082	1
MSL2	0	8	0	0	0	6.11216	0	0	0	0.0291848	0.68576	0.0675774	1	0.249663	0.619884	0.844959	0.883577	1
MYLK2	7	2	0	1	0	0.217618	1.27807	1.27807	0	0.0291573	0.822593	0.0738619	1	0.266313	0.619884	0.853875	0.895672	1
NBDY	0	3	0	0	0	9.50484	0	0	0	0.0287832	0.884127	0.0888197	1	0.303865	0.619884	0.896594	0.924428	1
RGS3	1	13	0	2	0	4.02809	6.3783	6.3783	0	0.0292613	0.0800206	0.0579353	1	0.22296	0.620834	0.844959	0.865494	1
ECHS1	3	0	0	0	0	0	0	0	0	0.0293838	0.444938	0.0789865	1	0.279492	0.622413	0.844959	0.905231	1
FBXL6	2	0	0	0	2	0	0	0	6.62155	0.0294266	0.469604	0.0824566	0.0571609	0.0299642	0.622413	0.844959	0.916396	1
MRPL50	0	4	1	0	0	7.90426	15.6613	15.6613	0	0.0294528	0.0821982	0.0446118	1	0.183344	0.622413	0.844959	0.826417	1
REEP1	3	0	0	0	0	0	0	0	0	0.029463	0.395817	0.0760682	1	0.272029	0.622413	0.844959	0.900808	1
ZNF20	2	0	0	0	0	0	0	0	0	0.0295172	0.409046	0.0795189	1	0.280842	0.622654	0.844959	0.907025	1
EMP1	1	5	0	0	0	5.38766	0	0	0	0.0295699	0.688366	0.0775386	1	0.275803	0.622654	0.844959	0.902152	1
ZDBF2	6	38	1	0	3	2.25888	0.796199	0.796199	2.27748	0.0295637	0.826235	0.057651	0.18457	0.0589818	0.622654	0.85582	0.865494	1
FAM210B	4	0	0	0	0	0	0	0	0	0.0296926	0.547717	0.0839216	1	0.291869	0.624008	0.844959	0.921063	1
DACT1	2	14	0	0	0	3.38653	0	0	0	0.029698	0.510923	0.0558754	1	0.217055	0.624008	0.844959	0.86079	1
TMEM269	4	0	0	0	1	0	0	0	7.26755	0.0298024	0.455156	0.0790586	0.118637	0.0531734	0.624943	0.844959	0.905471	1
CTSL	0	6	0	0	0	6.62082	0	0	0	0.0298064	0.655772	0.0658871	1	0.245088	0.624943	0.844959	0.879972	1
RNF212	3	10	1	0	2	3.32874	2.4906	2.4906	11.9988	0.0298627	0.457621	0.092453	0.0224546	0.0149001	0.625454	0.844959	0.924428	0.753167
RHBDD1	3	0	0	0	0	0	0	0	0	0.0299899	0.41118	0.0782125	1	0.277523	0.625907	0.844959	0.903072	1
IMPA2	0	6	1	0	0	6.6064	11.2183	11.2183	0	0.0300175	0.117968	0.0613087	1	0.232472	0.625907	0.844959	0.869264	1
PCSK9	8	3	0	0	1	0.264795	0	0	2.57982	0.0301426	0.221942	0.0606687	0.26816	0.0832724	0.625907	0.844959	0.869264	1
KCTD20	0	7	0	1	6	6.28224	10.0712	10.0712	25.5403	0.0301485	0.132399	0.0670888	0.000101391	8.77e-05	0.625907	0.844959	0.883577	0.0211889
RTCB	2	0	0	0	0	0	0	0	0	0.0301488	0.38789	0.0796285	1	0.281119	0.625907	0.844959	0.907604	1
RGPD2	1	0	0	0	0	0	0	0	0	0.0302376	0.352445	0.0821866	1	0.287551	0.625907	0.844959	0.915334	1
RALGDS	2	14	1	1	1	3.37326	5.84231	5.84231	1.9539	0.0302753	0.0807431	0.0534537	0.322774	0.0872979	0.625907	0.844959	0.85013	1
URM1	1	5	0	0	0	5.34834	0	0	0	0.0302879	0.666739	0.0769128	1	0.2742	0.625907	0.844959	0.901172	1
NAV2	3	22	2	0	2	2.84037	3.16345	3.16345	1.436	0.0303289	0.219335	0.0858781	0.322824	0.127126	0.625907	0.844959	0.922207	1
ZDHHC14	5	16	0	0	0	2.64819	0	0	0	0.0303541	0.342593	0.0416049	1	0.173889	0.625907	0.844959	0.807531	1
ZNF491	0	7	0	0	0	6.2681	0	0	0	0.0303796	0.646777	0.0647267	1	0.241921	0.625907	0.844959	0.879764	1
TRH	3	0	0	0	0	0	0	0	0	0.0304004	0.48638	0.0836019	1	0.291076	0.625907	0.844959	0.920326	1
SPATA25	0	5	0	0	0	7.04595	0	0	0	0.0304231	0.778762	0.0840036	1	0.292072	0.625907	0.844959	0.921121	1
ITSN2	0	12	1	1	0	5.54794	6.03103	6.03103	0	0.0304297	0.121901	0.0844535	1	0.293185	0.625907	0.844959	0.922207	1
SERTAD2	3	0	0	0	0	0	0	0	0	0.0304305	0.601557	0.0889316	1	0.304136	0.625907	0.844959	0.924428	1
ZNF181	2	13	0	0	0	3.41901	0	0	0	0.0304315	0.389433	0.0393478	1	0.16665	0.625907	0.844959	0.783584	1
MBLAC1	3	0	0	0	0	0	0	0	0	0.0304922	0.602057	0.0891026	1	0.30455	0.625907	0.844959	0.924428	1
IGSF10	4	28	0	1	1	2.56562	1.30554	1.30554	0.681333	0.0303156	0.813028	0.0850428	0.555849	0.191535	0.625907	0.850045	0.922207	1
CEACAM20	7	2	1	0	0	0.220096	1.12398	1.12398	0	0.0304732	0.913517	0.0819151	1	0.286873	0.625907	0.922906	0.914625	1
PTBP1	5	1	0	0	0	0.14615	0	0	0	0.0305571	0.328442	0.0738199	1	0.266204	0.626582	0.844959	0.895672	1
IFNA10	0	4	1	0	0	7.79625	24.8152	24.8152	0	0.0305972	0.0495879	0.0316162	1	0.140821	0.626747	0.844959	0.736124	1
ZNF846	5	1	0	0	0	0.146329	0	0	0	0.0306772	0.237827	0.0652618	1	0.243384	0.627726	0.844959	0.87985	1
RGPD6	1	0	0	0	0	0	0	0	0	0.0307615	0.349714	0.0831682	1	0.289998	0.627726	0.844959	0.919173	1
LCTL	5	1	2	0	0	0.1465	2.46737	2.46737	0	0.030792	0.307887	0.026454	1	0.122544	0.627726	0.844959	0.684507	1
FPGT-TNNI3K	1	13	0	0	1	3.98127	0	0	1.88191	0.0308239	0.358507	0.0275306	0.330533	0.0518642	0.627726	0.844959	0.6953	1
ACSM5	5	1	0	0	0	0.146568	0	0	0	0.0308376	0.234272	0.0651275	1	0.243017	0.627726	0.844959	0.87985	1
DNAH12	5	37	1	1	2	2.35458	1.00993	1.00993	0.90271	0.0307354	0.990336	0.0569726	0.443	0.118102	0.627726	0.991552	0.862928	1
RANBP17	0	10	2	1	0	5.71342	12.6463	12.6463	0	0.0309487	0.0141021	0.0269885	1	0.12448	0.629222	0.844959	0.690522	1
HOXB2	6	1	0	0	1	0.153738	0	0	5.00789	0.0309818	0.435023	0.0812521	0.162178	0.0702252	0.629222	0.844959	0.911384	1
C3AR1	1	9	0	0	0	4.31002	0	0	0	0.0310418	0.61912	0.0700946	1	0.2564	0.629222	0.844959	0.887376	1
TBC1D10A	2	0	0	0	0	0	0	0	0	0.0310816	0.440021	0.0847158	1	0.293833	0.629222	0.844959	0.922207	1
ZNF519	2	0	1	0	0	0	2.6371	2.6371	0	0.0311214	0.441307	0.0438341	1	0.180918	0.629222	0.844959	0.818208	1
ITM2A	3	0	0	0	0	0	0	0	0	0.0311547	0.454032	0.0834504	1	0.2907	0.629222	0.844959	0.919614	1
TTLL3	4	1	0	0	0	0.137914	0	0	0	0.0312049	0.297135	0.0744536	1	0.267853	0.629222	0.844959	0.897942	1
NID1	4	21	1	0	0	2.64942	1.40949	1.40949	0	0.031213	0.762779	0.0918818	1	0.311227	0.629222	0.844959	0.924428	1
PLEKHA8	2	0	0	0	0	0	0	0	0	0.031242	0.366283	0.0805124	1	0.283351	0.629222	0.844959	0.908649	1
STAU1	1	10	0	0	0	4.19165	0	0	0	0.0312485	0.476244	0.0484713	1	0.195183	0.629222	0.844959	0.840135	1
CFAP97	2	0	0	1	0	0	3.27098	3.27098	0	0.0312653	0.356949	0.0371001	1	0.159313	0.629222	0.844959	0.765612	1
NUTM2F	1	11	0	0	0	4.09935	0	0	0	0.0313536	0.532354	0.0569773	1	0.220223	0.629222	0.844959	0.862928	1
C8A	0	8	0	0	0	5.98596	0	0	0	0.0314075	0.595206	0.0571418	1	0.220694	0.629222	0.844959	0.863839	1
ARIH2	2	0	1	0	0	0	1.93356	1.93356	0	0.0314113	0.589433	0.0556917	1	0.216525	0.629222	0.844959	0.86079	1
FBXO2	0	6	0	0	0	6.51347	0	0	0	0.0314208	0.70306	0.0761869	1	0.272335	0.629222	0.844959	0.900808	1
FKBP4	0	7	1	0	0	6.20429	8.59008	8.59008	0	0.0314484	0.156713	0.0759945	1	0.27184	0.629222	0.844959	0.900808	1
LRRC2	0	6	0	0	0	6.51108	0	0	0	0.0314579	0.653647	0.0688608	1	0.253109	0.629222	0.844959	0.884583	1
SF3B1	2	19	0	0	0	3.18394	0	0	0	0.031516	0.258821	0.0187904	1	0.093471	0.629741	0.844959	0.606563	1
KRTAP26-1	1	6	0	0	0	4.8868	0	0	0	0.0315832	0.725102	0.085267	1	0.295192	0.629767	0.844959	0.922207	1
BTD	5	1	0	0	0	0.147686	0	0	0	0.0315954	0.383134	0.0801936	1	0.282547	0.629767	0.844959	0.907845	1
DBH	1	10	1	0	0	4.17991	4.50526	4.50526	0	0.0316139	0.269716	0.0893413	1	0.305127	0.629767	0.844959	0.924428	1
ATL2	0	8	4	1	0	5.94008	25.5953	25.5953	0	0.0322619	0.000239403	0.00107255	1	0.00840636	0.630361	0.0806856	0.131126	0.554706
CASP10	1	9	3	0	0	4.27476	12.6726	12.6726	0	0.0320843	0.00700881	0.0122716	1	0.0662724	0.630361	0.652887	0.504322	1
GPR135	2	0	0	0	0	0	0	0	0	0.0316924	0.668199	0.0952319	1	0.319164	0.630361	0.844959	0.929343	1
GAS2L1	0	9	0	0	1	5.80087	0	0	2.62143	0.0317812	0.702667	0.0751268	0.265182	0.0979362	0.630361	0.844959	0.900437	1
HEPH	6	3	1	0	0	0.247798	0.737829	0.737829	0	0.0317853	0.767494	0.0951119	1	0.318882	0.630361	0.844959	0.929343	1
PHRF1	1	14	1	0	2	3.90148	4.14492	4.14492	2.16705	0.0318313	0.29365	0.0939566	0.22532	0.102785	0.630361	0.844959	0.926456	1
MMP3	0	7	0	0	0	6.1781	0	0	0	0.0318993	0.633835	0.0655349	1	0.244129	0.630361	0.844959	0.87985	1
UBL7	6	1	1	0	0	0.155115	1.44076	1.44076	0	0.0319176	0.744007	0.0760447	1	0.271969	0.630361	0.844959	0.900808	1
RTKN2	0	8	0	1	2	5.95742	4.83922	4.83922	5.8617	0.0319359	0.281658	0.0973598	0.0681696	0.0399221	0.630361	0.844959	0.929846	1
C1orf94	2	0	1	0	0	0	3.5381	3.5381	0	0.0319615	0.329765	0.0356193	1	0.154405	0.630361	0.844959	0.760455	1
MRGBP	0	5	0	0	0	6.9297	0	0	0	0.0319897	0.737301	0.0828861	1	0.289296	0.630361	0.844959	0.917092	1
LILRB3	19	11	0	0	3	0.456845	0	0	8.32835	0.0320108	0.0345914	0.0198751	0.0221163	0.00383728	0.630361	0.844959	0.620092	0.362632
DNAJC1	2	0	0	0	0	0	0	0	0	0.03202	0.366208	0.0821147	1	0.287372	0.630361	0.844959	0.915334	1
PRAMEF1	4	14	0	0	0	2.83319	0	0	0	0.032071	0.410593	0.0522343	1	0.206431	0.630361	0.844959	0.84871	1
PDLIM3	6	1	3	0	0	0.155454	5.89703	5.89703	0	0.0321504	0.0264751	0.00230867	1	0.0163248	0.630361	0.844959	0.201617	0.788509
RSPO1	3	0	0	0	0	0	0	0	0	0.032157	0.485728	0.0875516	1	0.300786	0.630361	0.844959	0.924428	1
TK1	3	0	0	0	0	0	0	0	0	0.0322644	0.494388	0.0882836	1	0.302566	0.630361	0.844959	0.924428	1
RHOBTB2	10	5	0	0	0	0.332801	0	0	0	0.0322984	0.139807	0.050689	1	0.201846	0.630361	0.844959	0.845788	1
TRIM68	2	0	0	0	0	0	0	0	0	0.0323008	0.411316	0.0857123	1	0.296287	0.630361	0.844959	0.922207	1
LINGO4	5	1	0	0	0	0.148815	0	0	0	0.0323703	0.439258	0.0856819	1	0.296212	0.630361	0.844959	0.922207	1
DDX6	0	7	1	0	1	6.15034	6.78326	6.78326	3.69384	0.0323852	0.200422	0.0873786	0.206251	0.090401	0.630361	0.844959	0.924428	1
PLOD2	0	9	0	0	0	5.77012	0	0	0	0.0323928	0.529642	0.0459386	1	0.18745	0.630361	0.844959	0.832956	1
GSX2	0	6	0	0	0	6.45057	0	0	0	0.0324137	0.782752	0.088696	1	0.303566	0.630361	0.844959	0.924428	1
CHURC1-FNTB	1	9	1	0	0	4.26352	3.62506	3.62506	0	0.0324248	0.335958	0.0972608	1	0.323913	0.630361	0.844959	0.929846	1
MALT1	4	1	0	0	2	0.139765	0	0	4.3341	0.0324769	0.213677	0.0679889	0.102723	0.0416535	0.630361	0.844959	0.883577	1
CALN1	4	11	0	0	0	2.99276	0	0	0	0.0324815	0.400081	0.0525691	1	0.207418	0.630361	0.844959	0.84871	1
EPM2AIP1	8	3	0	0	0	0.269751	0	0	0	0.0326389	0.209952	0.0630598	1	0.237336	0.632787	0.844959	0.87394	1
KLLN	0	5	0	0	0	6.87549	0	0	0	0.032753	0.778561	0.0895846	1	0.305714	0.634044	0.844959	0.924428	1
VWA1	2	0	0	0	0	0	0	0	0	0.0327686	0.625706	0.0966712	1	0.322538	0.634044	0.844959	0.929343	1
STN1	0	6	0	0	0	6.42207	0	0	0	0.0328756	0.630915	0.0679096	1	0.250558	0.63412	0.844959	0.883577	1
F3	3	0	0	0	0	0	0	0	0	0.0328856	0.430039	0.0856637	1	0.296167	0.63412	0.844959	0.922207	1
ST6GAL2	1	10	0	0	0	4.13965	0	0	0	0.0329021	0.596805	0.07013	1	0.256494	0.63412	0.844959	0.887376	1
IGKV2D-29	0	3	0	0	1	8.99801	0	0	17.5276	0.0328346	0.844602	0.0970621	0.0534935	0.0325062	0.63412	0.866574	0.929846	1
TFF3	0	3	0	0	0	8.97207	0	0	0	0.0330616	0.782703	0.0924812	1	0.312656	0.636566	0.844959	0.924428	1
OR6B1	3	0	0	0	0	0	0	0	0	0.0331993	0.556495	0.0936687	1	0.315475	0.638447	0.844959	0.926363	1
TRIB2	0	6	0	0	0	6.3997	0	0	0	0.0332434	0.735303	0.0847055	1	0.293807	0.638447	0.844959	0.922207	1
LYPD3	1	8	0	0	0	4.37483	0	0	0	0.0332572	0.627422	0.0762821	1	0.27258	0.638447	0.844959	0.900808	1
KLRD1	0	4	0	0	0	7.54798	0	0	0	0.0334431	0.689667	0.0809019	1	0.284331	0.641386	0.844959	0.909542	1
C9orf64	0	6	0	0	1	6.38482	0	0	5.22754	0.0334906	0.705602	0.0810315	0.156589	0.0681005	0.641668	0.844959	0.910476	1
PRSS41	1	8	0	0	0	4.36411	0	0	0	0.0335726	0.619198	0.0757763	1	0.271277	0.642611	0.844959	0.900808	1
MC2R	3	0	0	0	0	0	0	0	0	0.033637	0.663248	0.0991196	1	0.328228	0.64266	0.844959	0.929846	1
SERTAD4	0	6	0	0	0	6.37584	0	0	0	0.0336409	0.673939	0.0764774	1	0.273083	0.64266	0.844959	0.900808	1
KIR3DL2	1	9	0	0	1	4.22106	0	0	3.92065	0.0337465	0.534661	0.0625662	0.197004	0.0665108	0.643668	0.844959	0.872559	1
CAMKK1	2	0	0	0	0	0	0	0	0	0.0337595	0.418567	0.0893076	1	0.305045	0.643668	0.844959	0.924428	1
OR2T3	3	0	0	0	1	0	0	0	5.60445	0.0338134	0.581286	0.0962815	0.147847	0.0747627	0.644068	0.844959	0.929343	1
BOD1L1	12	13	0	0	0	0.430721	0	0	0	0.0338597	0.0316556	0.0239844	1	0.113455	0.644323	0.844959	0.662004	1
TMOD4	2	10	0	0	0	3.54393	0	0	0	0.0339506	0.417478	0.0500587	1	0.199962	0.645075	0.844959	0.841424	1
TBX1	5	1	0	0	0	0.151126	0	0	0	0.0339869	0.442685	0.0894391	1	0.305363	0.645075	0.844959	0.924428	1
IL17RD	0	8	0	0	0	5.85015	0	0	0	0.0340125	0.624193	0.0669376	1	0.247936	0.645075	0.844959	0.883577	1
AMZ2	0	6	0	0	0	6.35273	0	0	0	0.0340311	0.661918	0.0753204	1	0.270099	0.645075	0.844959	0.900437	1
MINDY1	2	0	0	0	0	0	0	0	0	0.0344567	0.397961	0.0894102	1	0.305293	0.652116	0.844959	0.924428	1
BMP4	0	7	0	0	0	6.03642	0	0	0	0.0344693	0.71159	0.0833199	1	0.290375	0.652116	0.844959	0.919291	1
CYP2W1	9	3	0	0	0	0.280882	0	0	0	0.0345175	0.258457	0.0711171	1	0.25911	0.652397	0.844959	0.890686	1
SLFN13	0	9	0	0	0	5.66483	0	0	0	0.0345869	0.629402	0.0682392	1	0.251443	0.652488	0.844959	0.884225	1
IFNL3	1	6	0	0	0	4.76074	0	0	0	0.0345955	0.639854	0.0821467	1	0.287452	0.652488	0.844959	0.915334	1
ZNF254	0	8	0	0	1	5.82003	0	0	2.70882	0.0346224	0.598014	0.0631566	0.25914	0.0836737	0.652488	0.844959	0.87394	1
SLC5A12	2	12	0	0	1	3.38087	0	0	2.88824	0.0346875	0.335717	0.0359634	0.247565	0.0509386	0.653087	0.844959	0.760455	1
IKBKG	2	0	0	0	0	0	0	0	0	0.0347938	0.418719	0.0915296	1	0.310385	0.653161	0.844959	0.924428	1
CBWD6	0	6	0	0	0	6.30584	0	0	0	0.0348392	0.591124	0.0644233	1	0.24109	0.653161	0.844959	0.878603	1
POU2AF1	0	5	0	0	0	6.73384	0	0	0	0.0348517	0.706878	0.0851019	1	0.294785	0.653161	0.844959	0.922207	1
TRMT5	0	7	0	1	2	6.01381	7.99487	7.99487	7.01105	0.0349008	0.168985	0.0856008	0.0525259	0.0287964	0.653161	0.844959	0.922207	1
VNN2	0	7	0	0	0	6.01157	0	0	0	0.0349438	0.644305	0.0731278	1	0.264397	0.653161	0.844959	0.894805	1
ARNT	0	9	0	0	0	5.64708	0	0	0	0.0349727	0.539447	0.0514666	1	0.204159	0.653161	0.844959	0.848556	1
FMO1	0	7	0	0	0	6.00762	0	0	0	0.03502	0.614588	0.0678878	1	0.250499	0.653161	0.844959	0.883577	1
LRP6	0	12	0	1	0	5.34594	3.61042	3.61042	0	0.0350288	0.372961	0.108052	1	0.348482	0.653161	0.844959	0.931863	1
FRY	13	13	1	0	0	0.44175	0.287581	0.287581	0	0.0350896	0.14777	0.07507	1	0.269451	0.653161	0.844959	0.900437	1
ARID4B	3	1	2	2	2	0.130715	4.08067	4.08067	2.72326	0.0350963	0.0547036	0.00130038	0.178322	0.00217261	0.653161	0.844959	0.146196	0.248541
USP17L7	0	7	0	0	0	6.00144	0	0	0	0.0351393	0.702253	0.0832949	1	0.290313	0.653161	0.844959	0.919291	1
CDK5RAP2	0	11	0	0	0	5.42033	0	0	0	0.0351566	0.493303	0.0410893	1	0.172247	0.653161	0.844959	0.804594	1
IL17REL	1	8	0	0	0	4.3111	0	0	0	0.0351816	0.544262	0.0673598	1	0.249077	0.653161	0.844959	0.883577	1
THOC2	7	5	0	0	0	0.308498	0	0	0	0.035233	0.0453036	0.0337787	1	0.148218	0.653161	0.844959	0.748334	1
ADAM9	0	9	1	1	0	5.63062	8.97226	8.97226	0	0.0353347	0.0617127	0.0648642	1	0.242298	0.653161	0.844959	0.87985	1
TEKT5	2	0	0	0	0	0	0	0	0	0.0353457	0.482719	0.0966089	1	0.322392	0.653161	0.844959	0.929343	1
KCMF1	2	0	0	0	1	0	0	0	4.68015	0.0353559	0.441237	0.0941866	0.171303	0.082718	0.653161	0.844959	0.927266	1
IQCF6	0	4	0	0	0	7.39229	0	0	0	0.0353953	0.737867	0.091725	1	0.310852	0.653161	0.844959	0.924428	1
CORO7-PAM16	3	17	0	0	0	2.86812	0	0	0	0.0354287	0.286238	0.0314723	1	0.140324	0.653161	0.844959	0.736124	1
METTL13	0	8	2	0	0	5.78094	15.2681	15.2681	0	0.035432	0.0229866	0.0324102	1	0.143554	0.653161	0.844959	0.740668	1
TMED9	0	5	0	0	0	6.69498	0	0	0	0.0354552	0.681422	0.0825073	1	0.288352	0.653161	0.844959	0.916396	1
ADH1C	0	6	0	1	0	6.2707	11.6615	11.6615	0	0.0354594	0.113157	0.0678213	1	0.25032	0.653161	0.844959	0.883577	1
CNTN6	5	23	1	0	2	2.43494	0.81516	0.81516	3.47487	0.0350008	0.846113	0.0699012	0.135202	0.0535072	0.653161	0.86726	0.887243	1
LPL	2	0	0	0	1	0	0	0	3.75592	0.0355132	0.417158	0.092953	0.203634	0.0940192	0.653536	0.844959	0.924428	1
CHST11	0	6	0	0	0	6.26036	0	0	0	0.0356444	0.724812	0.0885636	1	0.303245	0.655046	0.844959	0.924428	1
RETREG2	0	7	0	0	1	5.97201	0	0	3.28643	0.0357147	0.659034	0.0772221	0.225253	0.08787	0.655046	0.844959	0.901599	1
SRF	2	0	0	0	1	0	0	0	3.51241	0.035737	0.570976	0.101819	0.2143	0.105279	0.655046	0.844959	0.931863	1
TRIM29	3	14	0	0	1	2.96399	0	0	3.03534	0.035752	0.400126	0.0524607	0.238822	0.0674014	0.655046	0.844959	0.84871	1
EGFR	12	8	0	0	0	0.397211	0	0	0	0.0358141	0.0466184	0.0296731	1	0.134048	0.655046	0.844959	0.715525	1
ZNF865	7	3	1	0	1	0.266673	2.83912	2.83912	1.68662	0.0358276	0.38871	0.0509674	0.353625	0.0904067	0.655046	0.844959	0.847809	1
ATG5	3	0	0	0	0	0	0	0	0	0.0358296	0.374107	0.0873499	1	0.300294	0.655046	0.844959	0.924428	1
OR4C16	2	8	1	0	0	3.72369	9.89874	9.89874	0	0.0358827	0.109962	0.0533344	1	0.209667	0.655063	0.844959	0.848925	1
CUL3	0	9	1	0	1	5.60535	5.16486	5.16486	2.32486	0.0358983	0.264096	0.105986	0.287988	0.137025	0.655063	0.844959	0.931863	1
ALPK2	3	23	0	0	1	2.74101	0	0	0.8235	0.0359567	0.270607	0.0277879	0.513675	0.0749284	0.655063	0.844959	0.6953	1
SH3BP5L	2	0	0	0	0	0	0	0	0	0.0359713	0.475834	0.097616	1	0.324741	0.655063	0.844959	0.929846	1
HPSE	2	0	2	0	0	0	5.10326	5.10326	0	0.035998	0.103236	0.00958741	1	0.054143	0.655063	0.844959	0.464455	1
ENOPH1	0	5	0	0	0	6.65528	0	0	0	0.0360846	0.683594	0.0841571	1	0.292452	0.655162	0.844959	0.921763	1
PARL	1	8	0	0	0	4.28191	0	0	0	0.0361039	0.505976	0.0624377	1	0.235614	0.655162	0.844959	0.872559	1
LCE3B	0	3	0	0	0	8.64893	0	0	0	0.0360697	0.812475	0.10258	1	0.336166	0.655162	0.849857	0.931863	1
NDE1	0	6	0	0	1	6.23092	0	0	5.32089	0.0361769	0.652676	0.0779872	0.154329	0.0652318	0.655414	0.844959	0.903072	1
CCDC28A	1	7	1	0	1	4.4526	5.87547	5.87547	6.50116	0.0362527	0.204577	0.0854461	0.130518	0.061294	0.655414	0.844959	0.922207	1
MGARP	0	5	0	1	0	6.64241	18.5099	18.5099	0	0.0362915	0.068466	0.0477054	1	0.192859	0.655414	0.844959	0.837082	1
AP1B1	4	1	0	0	1	0.145133	0	0	1.88191	0.0363135	0.282935	0.082589	0.330533	0.125598	0.655414	0.844959	0.916396	1
DDX1	4	1	0	0	0	0.145156	0	0	0	0.0363301	0.167842	0.0671662	1	0.248554	0.655414	0.844959	0.883577	1
IFNE	0	4	0	0	0	7.3198	0	0	0	0.0363523	0.742085	0.0944399	1	0.317298	0.655414	0.844959	0.928005	1
C9orf40	0	5	0	0	0	6.63892	0	0	0	0.0363478	0.793456	0.0998419	1	0.329894	0.655414	0.845292	0.930808	1
HRCT1	2	6	0	0	6	4.1079	0	0	92.4733	0.0363999	0.778568	0.103495	1.35e-07	2.67e-07	0.655668	0.844959	0.931863	0.000130757
KLHL25	8	3	0	0	0	0.276863	0	0	0	0.036438	0.372486	0.0878224	1	0.301445	0.65575	0.844959	0.924428	1
TOM1L2	0	7	0	0	0	5.92863	0	0	0	0.0365819	0.594927	0.0668849	1	0.247794	0.657598	0.844959	0.883577	1
TMEM106B	3	0	0	0	0	0	0	0	0	0.036633	0.40037	0.0911903	1	0.309573	0.657598	0.844959	0.924428	1
CEP41	0	6	0	0	0	6.20541	0	0	0	0.0366457	0.624704	0.073841	1	0.266259	0.657598	0.844959	0.895672	1
KCTD8	7	2	1	0	1	0.230999	2.56361	2.56361	3.77177	0.0366751	0.430992	0.0585363	0.202977	0.0645497	0.657598	0.844959	0.866834	1
DCLK1	0	8	1	1	0	5.71984	12.339	12.339	0	0.0367401	0.0344419	0.0445261	1	0.183077	0.657669	0.844959	0.825611	1
EIF2S3B	2	0	0	0	0	0	0	0	0	0.0367464	0.547247	0.103117	1	0.337387	0.657669	0.844959	0.931863	1
CNTN5	1	13	2	3	1	3.80433	11.5293	11.5293	1.62381	0.0375712	0.00173814	0.00596623	0.361765	0.0154073	0.657715	0.293832	0.358756	0.764649
GOLGA5	4	1	0	0	2	0.145907	0	0	4.88475	0.0368845	0.168327	0.068023	0.0877277	0.0365296	0.657715	0.844959	0.883577	1
BAG5	2	0	0	0	0	0	0	0	0	0.0370436	0.491326	0.100888	1	0.3323	0.657715	0.844959	0.931863	1
CRLF3	2	0	0	0	0	0	0	0	0	0.0371038	0.381307	0.0936092	1	0.315335	0.657715	0.844959	0.926244	1
RPGRIP1L	2	18	0	0	1	3.10643	0	0	1.35852	0.0371298	0.251126	0.0213729	0.40082	0.0493431	0.657715	0.844959	0.634746	1
RGL4	0	7	0	0	0	5.90179	0	0	0	0.0371305	0.636224	0.0757832	1	0.271295	0.657715	0.844959	0.900808	1
BLVRB	0	5	0	0	0	6.58741	0	0	0	0.0371914	0.737879	0.0947121	1	0.31794	0.657715	0.844959	0.928477	1
KCNIP3	0	5	0	0	0	6.58538	0	0	0	0.0372251	0.692285	0.0879202	1	0.301683	0.657715	0.844959	0.924428	1
RASSF6	0	6	0	0	0	6.1705	0	0	0	0.0372989	0.613142	0.0728613	1	0.2637	0.657715	0.844959	0.894805	1
OXSR1	0	7	1	0	0	5.88853	5.23536	5.23536	0	0.037405	0.260559	0.10785	1	0.348033	0.657715	0.844959	0.931863	1
TRIO	3	21	4	0	3	2.75262	5.18694	5.18694	1.73126	0.0374325	0.0264087	0.0385404	0.248889	0.0541656	0.657715	0.844959	0.774848	1
RTN2	0	7	1	0	1	5.88695	7.73493	7.73493	3.27439	0.0374379	0.174924	0.0919189	0.225868	0.101205	0.657715	0.844959	0.924428	1
CLCN3	0	9	0	0	0	5.53595	0	0	0	0.037498	0.577455	0.0630122	1	0.237205	0.657715	0.844959	0.87394	1
AGA	0	6	0	0	0	6.15937	0	0	0	0.03751	0.645448	0.0792707	1	0.280213	0.657715	0.844959	0.906838	1
ANKMY1	2	14	0	3	1	3.22593	8.56389	8.56389	1.73406	0.0375299	0.0148767	0.0227345	0.34772	0.0461684	0.657715	0.844959	0.652749	1
MAPKAPK2	0	6	0	0	0	6.15706	0	0	0	0.037554	0.664787	0.082824	1	0.289142	0.657715	0.844959	0.917092	1
SERPINA7	0	6	0	0	0	6.15491	0	0	0	0.0375949	0.707835	0.0901683	1	0.30712	0.657715	0.844959	0.924428	1
EDRF1	10	7	2	1	0	0.373016	1.27311	1.27311	0	0.0376219	0.717054	0.0636427	1	0.238945	0.657715	0.844959	0.875831	1
ECM2	0	8	0	0	1	5.67866	0	0	2.55403	0.0376522	0.600836	0.0688883	0.27004	0.0927238	0.657715	0.844959	0.884583	1
GPRASP2	0	9	1	0	0	5.52864	8.81125	8.81125	0	0.037671	0.152569	0.0879916	1	0.301856	0.657715	0.844959	0.924428	1
ZNF860	4	1	0	0	0	0.146983	0	0	0	0.0376857	0.299339	0.0868296	1	0.299024	0.657715	0.844959	0.924428	1
CCT8	2	12	0	0	0	3.3181	0	0	0	0.0377936	0.37198	0.0457418	1	0.186843	0.657715	0.844959	0.832956	1
NAT10	0	9	0	0	0	5.52303	0	0	0	0.0378044	0.542913	0.0562493	1	0.218133	0.657715	0.844959	0.86079	1
ZNF835	2	12	0	0	0	3.31788	0	0	0	0.0378048	0.56931	0.0799599	1	0.281957	0.657715	0.844959	0.907821	1
REEP2	3	0	0	0	0	0	0	0	0	0.0378293	0.463957	0.0985869	1	0.326995	0.657715	0.844959	0.929846	1
MYBPHL	0	6	0	0	0	6.14233	0	0	0	0.0378357	0.676343	0.0854085	1	0.29554	0.657715	0.844959	0.922207	1
PRAMEF10	2	0	0	0	0	0	0	0	0	0.0378412	0.522188	0.104374	1	0.340235	0.657715	0.844959	0.931863	1
ZPR1	2	0	0	0	0	0	0	0	0	0.0378583	0.398181	0.0964585	1	0.32204	0.657715	0.844959	0.929343	1
OR1G1	0	5	0	0	0	6.54747	0	0	0	0.0378617	0.788877	0.102898	1	0.33689	0.657715	0.844959	0.931863	1
CAMSAP2	4	2	2	0	2	0.198734	1.91024	1.91024	2.39976	0.037908	0.461562	0.0362856	0.203598	0.0436459	0.657715	0.844959	0.760455	1
LRRC37A	1	0	0	0	0	0	0	0	0	0.0379237	0.418054	0.102551	1	0.3361	0.657715	0.844959	0.931863	1
RAD50	0	11	1	0	4	5.30902	3.41506	3.41506	5.44651	0.0379257	0.392675	0.115306	0.038536	0.0285105	0.657715	0.844959	0.931863	1
S100A7L2	0	3	0	0	0	8.56542	0	0	0	0.036905	0.850192	0.107737	1	0.347782	0.657715	0.869573	0.931863	1
HIST1H4I	0	4	0	0	1	7.24867	0	0	17.1906	0.0373227	0.883523	0.110683	0.0544759	0.0368471	0.657715	0.896027	0.931863	1
HIST1H4K	0	4	0	0	0	7.28576	0	0	0	0.0368127	0.895216	0.11009	1	0.352999	0.657715	0.90657	0.931863	1
SF3B4	1	9	0	0	1	4.09407	0	0	4.20663	0.038063	0.561528	0.0745945	0.186467	0.0733749	0.658929	0.844959	0.898442	1
CAVIN2	2	0	0	0	0	0	0	0	0	0.0380785	0.554139	0.106532	1	0.345091	0.658929	0.844959	0.931863	1
CEP63	4	1	0	0	1	0.147572	0	0	2.53951	0.0381284	0.195658	0.0742913	0.271109	0.0987919	0.658929	0.844959	0.897843	1
TOR1AIP2	2	0	2	0	0	0	7.44808	7.44808	0	0.0381305	0.0512528	0.00534676	1	0.0333171	0.658929	0.844959	0.336313	1
OR8B4	3	0	0	0	0	0	0	0	0	0.0382129	0.59037	0.107087	1	0.346331	0.659043	0.844959	0.931863	1
LNX2	0	8	0	0	0	5.65149	0	0	0	0.0382676	0.606148	0.0710206	1	0.258855	0.659043	0.844959	0.890686	1
C17orf97	2	0	0	0	0	0	0	0	0	0.0382714	0.643725	0.110763	1	0.354482	0.659043	0.844959	0.931863	1
PPIP5K1	1	0	1	0	0	0	2.24673	2.24673	0	0.0382718	0.529248	0.0497597	1	0.199066	0.659043	0.844959	0.840135	1
EBI3	0	5	1	0	0	6.51675	15.595	15.595	0	0.0383869	0.0825794	0.0568614	1	0.219891	0.660077	0.844959	0.862928	1
ACAT1	2	0	0	0	0	0	0	0	0	0.0384422	0.427975	0.0998756	1	0.329972	0.660077	0.844959	0.930808	1
CREBZF	2	10	0	0	0	3.44322	0	0	0	0.0384854	0.628911	0.0908127	1	0.308668	0.660077	0.844959	0.924428	1
DENND4A	8	7	3	1	2	0.353377	1.82394	1.82394	1.86522	0.0385007	0.337701	0.0203108	0.259217	0.0328883	0.660077	0.844959	0.629037	1
CXCR5	0	6	0	0	0	6.10755	0	0	0	0.0385109	0.775968	0.102211	1	0.335325	0.660077	0.844959	0.931863	1
ATG14	0	7	0	0	1	5.83366	0	0	3.62641	0.0385655	0.6064	0.0725724	0.209171	0.0787505	0.660077	0.844959	0.893293	1
TRIP10	2	13	0	1	0	3.25133	2.40419	2.40419	0	0.0385681	0.482106	0.117485	1	0.369074	0.660077	0.844959	0.931863	1
PDIA2	0	7	0	0	0	5.82897	0	0	0	0.0386665	0.669256	0.084876	1	0.294228	0.661184	0.844959	0.922207	1
MYO5A	2	19	1	0	1	3.0577	1.19195	1.19195	0.963264	0.0387296	0.880505	0.089078	0.478267	0.177051	0.661685	0.893878	0.924428	1
PAPSS1	1	11	4	1	0	3.89465	15.9055	15.9055	0	0.0388255	0.000443583	0.0017633	1	0.0129436	0.662115	0.118868	0.175095	0.703342
NRIP1	10	7	2	0	1	0.375287	1.47656	1.47656	1.54255	0.0388112	0.627879	0.0674529	0.372879	0.117781	0.662115	0.844959	0.883577	1
NTRK3	12	7	3	0	0	0.391263	1.61142	1.61142	0	0.0388564	0.478796	0.0498823	1	0.199434	0.662115	0.844959	0.840135	1
MTMR12	0	8	0	0	0	5.62133	0	0	0	0.038964	0.564662	0.0635294	1	0.238632	0.663143	0.844959	0.875831	1
MAN1A2	4	1	0	0	0	0.148733	0	0	0	0.039008	0.220981	0.0794406	1	0.280644	0.663143	0.844959	0.906918	1
P2RY6	1	8	0	0	0	4.19481	0	0	0	0.0390184	0.701301	0.0985521	1	0.326914	0.663143	0.844959	0.929846	1
FRG1	3	0	0	0	0	0	0	0	0	0.0390619	0.3918	0.0952736	1	0.319262	0.663177	0.844959	0.929343	1
UBE3A	0	9	0	1	0	5.46662	5.82706	5.82706	0	0.0391748	0.234023	0.109572	1	0.351854	0.663177	0.844959	0.931863	1
ELMO2	4	1	0	0	0	0.148987	0	0	0	0.0392019	0.207497	0.0777397	1	0.276317	0.663177	0.844959	0.902519	1
STAT2	0	8	0	0	0	5.61112	0	0	0	0.0392031	0.538468	0.0582798	1	0.22394	0.663177	0.844959	0.865656	1
EEF1B2	1	6	0	0	0	4.58768	0	0	0	0.0392845	0.599349	0.0857152	1	0.296294	0.663177	0.844959	0.922207	1
KCNJ11	2	0	0	0	0	0	0	0	0	0.0393226	0.673945	0.11437	1	0.362361	0.663177	0.844959	0.931863	1
TAS2R10	0	5	0	0	0	6.46278	0	0	0	0.0393309	0.741771	0.100036	1	0.330342	0.663177	0.844959	0.931862	1
OPRL1	0	6	0	1	0	6.06618	23.513	23.513	0	0.0393322	0.0526257	0.042786	1	0.177628	0.663177	0.844959	0.814182	1
EXOSC8	0	5	0	0	0	6.46215	0	0	0	0.0393421	0.636847	0.0825556	1	0.288473	0.663177	0.844959	0.916396	1
OR14A2	0	5	0	0	0	6.46035	0	0	0	0.039374	0.797245	0.107456	1	0.347156	0.663177	0.845332	0.931863	1
OR5P3	0	5	0	0	0	6.45926	0	0	0	0.0393933	0.797053	0.107479	1	0.347206	0.663177	0.845332	0.931863	1
EVI2A	3	0	0	0	1	0	0	0	6.87622	0.0394422	0.520022	0.105888	0.12442	0.0702132	0.663292	0.844959	0.931863	1
RASGEF1C	2	0	0	0	0	0	0	0	0	0.0395041	0.447772	0.103507	1	0.338272	0.663292	0.844959	0.931863	1
DMBT1	16	17	3	0	0	0.490539	0.642493	0.642493	0	0.0395238	0.457184	0.120034	1	0.374504	0.663292	0.844959	0.931863	1
CCDC70	3	0	0	0	0	0	0	0	0	0.0395495	0.489668	0.104096	1	0.339606	0.663292	0.844959	0.931863	1
DYNLL1	7	0	0	0	0	0	0	0	0	0.0395697	0.496226	0.10057	1	0.33157	0.663292	0.844959	0.931863	1
GNA15	2	0	0	0	0	0	0	0	0	0.0397019	0.486785	0.10649	1	0.344996	0.664811	0.844959	0.931863	1
KRT86	2	11	0	0	0	3.34303	0	0	0	0.0397282	0.496648	0.0717475	1	0.260774	0.664811	0.844959	0.890739	1
EPS15L1	0	8	6	0	0	5.52164	36.0257	36.0257	0	0.0413683	1.7e-05	9.62e-05	1	0.000985751	0.665509	0.0128017	0.0209046	0.140754
MACF1	21	32	0	1	3	0.560325	0.147032	0.147032	0.706368	0.0408845	0.0106867	0.0168377	0.490175	0.0478462	0.665509	0.775302	0.574833	1
HSD11B1L	0	6	0	0	0	6.04217	0	0	0	0.0398183	0.696935	0.093028	1	0.313956	0.665509	0.844959	0.924428	1
NEFH	1	12	1	0	0	3.80524	5.16186	5.16186	0	0.0398687	0.234329	0.102533	1	0.33606	0.665509	0.844959	0.931863	1
AC010422.5	1	6	0	0	0	4.56643	0	0	0	0.0399092	0.622322	0.0905191	1	0.307964	0.665509	0.844959	0.924428	1
CTRB1	3	0	0	0	0	0	0	0	0	0.0399721	0.515708	0.106777	1	0.345638	0.665509	0.844959	0.931863	1
MMP2	9	4	0	0	0	0.318891	0	0	0	0.0400958	0.14333	0.0612173	1	0.232217	0.665509	0.844959	0.869264	1
AL049634.2	0	4	0	0	0	7.05633	0	0	0	0.0401112	0.768538	0.106426	1	0.344854	0.665509	0.844959	0.931863	1
LMOD2	0	7	0	0	3	5.76325	0	0	9.78733	0.0401146	0.677598	0.0892932	0.0156817	0.0106015	0.665509	0.844959	0.924428	0.628674
SSR2	0	4	0	0	0	7.05585	0	0	0	0.0401183	0.700837	0.096773	1	0.322775	0.665509	0.844959	0.929343	1
NUTM1	1	13	0	0	0	3.74548	0	0	0	0.040147	0.473573	0.059053	1	0.226133	0.665509	0.844959	0.86872	1
CABLES2	5	1	0	0	0	0.159607	0	0	0	0.0402673	0.370873	0.0966247	1	0.322429	0.665509	0.844959	0.929343	1
BECN2	2	0	0	0	0	0	0	0	0	0.0403078	0.558788	0.11189	1	0.356955	0.665509	0.844959	0.931863	1
PCBP4	0	6	0	0	0	6.01816	0	0	0	0.040311	0.661346	0.0876241	1	0.300963	0.665509	0.844959	0.924428	1
ECI2	0	6	0	1	0	6.01466	9.45476	9.45476	0	0.0403835	0.141601	0.0856146	1	0.296047	0.665509	0.844959	0.922207	1
ARHGEF1	1	12	0	0	1	3.79334	0	0	1.84501	0.040391	0.453153	0.055812	0.334659	0.093024	0.665509	0.844959	0.86079	1
TCF19	0	6	0	0	1	6.01296	0	0	5.1671	0.0404188	0.72479	0.098951	0.158088	0.0806821	0.665509	0.844959	0.929846	1
BCAR3	7	3	0	0	0	0.274838	0	0	0	0.040435	0.172877	0.0699599	1	0.256041	0.665509	0.844959	0.887243	1
GUCY2D	1	12	0	0	0	3.79222	0	0	0	0.0404406	0.52799	0.0707394	1	0.25811	0.665509	0.844959	0.890686	1
UBE2S	3	0	0	0	0	0	0	0	0	0.0404569	0.597878	0.112683	1	0.35869	0.665509	0.844959	0.931863	1
PTRH1	0	5	0	0	1	6.39944	0	0	8.31543	0.040474	0.732076	0.101112	0.105508	0.0591066	0.665509	0.844959	0.931863	1
UGT1A7	0	7	0	0	0	5.7449	0	0	0	0.0405296	0.649308	0.0846951	1	0.293782	0.665509	0.844959	0.922207	1
SH3BGRL3	0	3	0	0	0	8.22899	0	0	0	0.0405396	0.772336	0.109086	1	0.350778	0.665509	0.844959	0.931863	1
PYROXD2	0	7	0	0	0	5.74271	0	0	0	0.0405796	0.619866	0.0788606	1	0.279172	0.665509	0.844959	0.905231	1
CXXC1	0	9	0	0	0	5.41046	0	0	0	0.0405934	0.598521	0.0725518	1	0.262888	0.665509	0.844959	0.893293	1
TSG101	1	8	0	0	0	4.15066	0	0	0	0.0405941	0.512388	0.0707712	1	0.258195	0.665509	0.844959	0.890686	1
CHEK2	1	10	0	1	0	3.92675	3.09683	3.09683	0	0.0407263	0.392084	0.12163	1	0.377876	0.665509	0.844959	0.931863	1
AL031777.3	8	1	0	0	0	0.17696	0	0	0	0.0407397	0.392904	0.0958315	1	0.320572	0.665509	0.844959	0.929343	1
TATDN3	0	5	0	0	0	6.38449	0	0	0	0.0407496	0.631002	0.0840881	1	0.292281	0.665509	0.844959	0.921531	1
LINS1	0	8	0	0	0	5.5448	0	0	0	0.0407955	0.631187	0.0806398	1	0.283672	0.665509	0.844959	0.908869	1
FAM180A	0	4	0	0	0	7.00348	0	0	0	0.0409219	0.777511	0.109425	1	0.351529	0.665509	0.844959	0.931863	1
CHMP4C	3	0	0	0	0	0	0	0	0	0.0409557	0.395878	0.0993534	1	0.328767	0.665509	0.844959	0.929846	1
RASL11A	3	0	0	0	0	0	0	0	0	0.0409963	0.541211	0.110673	1	0.354283	0.665509	0.844959	0.931863	1
SLC16A6	2	11	0	0	0	3.31824	0	0	0	0.0410476	0.50542	0.0754891	1	0.270535	0.665509	0.844959	0.900437	1
KLHDC1	2	0	0	0	0	0	0	0	0	0.0410613	0.338524	0.0974402	1	0.324331	0.665509	0.844959	0.929846	1
NPR3	13	6	0	0	0	0.387003	0	0	0	0.0410973	0.133838	0.0569927	1	0.220267	0.665509	0.844959	0.862928	1
C8orf58	2	10	0	1	0	3.39059	4.00669	4.00669	0	0.04111	0.290345	0.10714	1	0.346451	0.665509	0.844959	0.931863	1
PIGB	0	7	0	0	2	5.71733	0	0	6.431	0.0411628	0.579434	0.0713066	0.0596558	0.0274796	0.665509	0.844959	0.890686	0.999174
FER1L6	3	20	2	2	1	2.72225	4.6024	4.6024	0.962227	0.0411655	0.0382203	0.0521433	0.478511	0.117042	0.665509	0.844959	0.84871	1
NCBP3	0	8	0	0	0	5.52929	0	0	0	0.041178	0.580724	0.0705032	1	0.257484	0.665509	0.844959	0.88992	1
TIMM21	3	0	0	0	0	0	0	0	0	0.0411848	0.386832	0.0989315	1	0.327792	0.665509	0.844959	0.929846	1
SPANXN1	1	3	0	0	0	6.44323	0	0	0	0.0412284	0.738316	0.111399	1	0.35588	0.665509	0.844959	0.931863	1
FAM209A	1	5	0	0	1	4.85694	0	0	10.3943	0.0412578	0.660089	0.0998577	0.0865188	0.0496896	0.665509	0.844959	0.930808	1
HIST1H2BL	4	0	0	0	0	0	0	0	0	0.0413085	0.704833	0.118903	1	0.3721	0.665509	0.844959	0.931863	1
PLXNB1	4	23	1	0	0	2.4952	1.4033	1.4033	0	0.0413099	0.76562	0.117405	1	0.368902	0.665509	0.844959	0.931863	1
PQLC2	0	5	0	0	1	6.34889	0	0	6.12266	0.0414148	0.703126	0.0984747	0.13731	0.0717113	0.665509	0.844959	0.929846	1
GZMM	0	5	0	0	0	6.34443	0	0	0	0.041499	0.756159	0.106958	1	0.346044	0.665509	0.844959	0.931863	1
OR52J3	1	7	0	0	0	4.28844	0	0	0	0.0415016	0.679685	0.10151	1	0.333725	0.665509	0.844959	0.931863	1
SLC46A2	2	0	0	0	0	0	0	0	0	0.041505	0.563715	0.114875	1	0.363455	0.665509	0.844959	0.931863	1
COA4	0	3	0	0	0	8.15589	0	0	0	0.0413908	0.806421	0.114824	1	0.363345	0.665509	0.847689	0.931863	1
OR8B8	0	5	0	0	0	6.37038	0	0	0	0.0410117	0.82293	0.11425	1	0.362099	0.665509	0.854011	0.931863	1
NR3C1	0	8	3	0	0	5.51326	19.3483	19.3483	0	0.0415778	0.0045378	0.0121459	1	0.0657187	0.665743	0.522254	0.503929	1
EFS	0	7	0	0	1	5.69909	0	0	3.18117	0.0415877	0.70063	0.0965036	0.230748	0.106989	0.665743	0.844959	0.929343	1
SULT1E1	0	5	0	0	0	6.33601	0	0	0	0.0416587	0.649568	0.0893554	1	0.305161	0.666193	0.844959	0.924428	1
ATP8B1	2	16	0	0	2	3.08652	0	0	2.85594	0.0416839	0.291848	0.0324358	0.169315	0.0340742	0.666193	0.844959	0.740668	1
BCHE	1	10	4	0	1	3.89996	17.407	17.407	2.96487	0.0418449	0.000861293	0.00285669	0.242931	0.00574134	0.666589	0.193662	0.231878	0.447096
TCP10L2	0	6	0	0	0	5.94848	0	0	0	0.0417817	0.645719	0.0874411	1	0.300517	0.666589	0.844959	0.924428	1
ASAP3	1	11	0	0	0	3.82403	0	0	0	0.0418277	0.441383	0.0559141	1	0.217167	0.666589	0.844959	0.86079	1
UNC93B1	14	7	0	1	1	0.408751	0.856264	0.856264	2.98966	0.0417503	0.877814	0.123105	0.24147	0.134235	0.666589	0.89169	0.931863	1
ARHGEF38	0	8	0	0	0	5.49713	0	0	0	0.0419844	0.583789	0.0724849	1	0.262713	0.666974	0.844959	0.893293	1
CSF2RA	2	10	0	0	0	3.37354	0	0	0	0.0420015	0.388254	0.0552612	1	0.21528	0.666974	0.844959	0.86079	1
HEY2	0	6	0	0	0	5.93823	0	0	0	0.0420034	0.723486	0.102138	1	0.335159	0.666974	0.844959	0.931863	1
USP17L2	1	9	0	0	0	3.99006	0	0	0	0.042048	0.581443	0.0853058	1	0.295287	0.666974	0.844959	0.922207	1
TOPORS	3	1	0	0	1	0.139831	0	0	1.7092	0.04205	0.288667	0.0970178	0.35079	0.149079	0.666974	0.844959	0.929846	1
MTFMT	2	0	0	0	0	0	0	0	0	0.0421105	0.404392	0.105551	1	0.342889	0.666974	0.844959	0.931863	1
BORCS7	1	4	0	0	0	5.36272	0	0	0	0.0421385	0.640655	0.10024	1	0.330812	0.666974	0.844959	0.931863	1
TICAM1	1	10	0	0	1	3.89298	0	0	2.50746	0.0421419	0.597297	0.0877414	0.273502	0.113503	0.666974	0.844959	0.924428	1
SLC4A11	2	13	0	0	0	3.18759	0	0	0	0.0422333	0.424251	0.0607852	1	0.231009	0.66788	0.844959	0.869264	1
ETV3L	6	1	0	0	0	0.169138	0	0	0	0.0422773	0.299245	0.0904378	1	0.307768	0.668036	0.844959	0.924428	1
MARK2	1	11	1	0	1	3.81269	3.71957	3.71957	2.26593	0.042332	0.327455	0.121048	0.293	0.153897	0.668361	0.844959	0.931863	1
BAAT	1	8	0	0	0	4.10079	0	0	0	0.0424594	0.575521	0.0857193	1	0.296304	0.669105	0.844959	0.922207	1
LRTM1	1	7	0	0	0	4.25902	0	0	0	0.0425299	0.558819	0.0837261	1	0.291384	0.669105	0.844959	0.921063	1
MED18	3	0	1	0	0	0	5.96808	5.96808	0	0.042549	0.185248	0.0348475	1	0.151823	0.669105	0.844959	0.760455	1
PRND	0	4	0	0	0	6.90116	0	0	0	0.0425502	0.784407	0.114043	1	0.361652	0.669105	0.844959	0.931863	1
PSMD2	5	2	1	0	0	0.220424	1.06916	1.06916	0	0.0424383	0.950975	0.106616	1	0.345278	0.669105	0.956206	0.931863	1
JSRP1	0	6	1	1	0	5.89142	31.274	31.274	0	0.0430325	0.00555495	0.0108639	1	0.0599938	0.670332	0.589273	0.493316	1
OR5T1	2	8	2	0	0	3.5384	17.1258	17.1258	0	0.0439844	0.00985987	0.0127133	1	0.0682083	0.670332	0.753915	0.505197	1
APOL1	0	6	0	0	0	5.9062	0	0	0	0.0427043	0.670188	0.0939909	1	0.316238	0.670332	0.844959	0.926456	1
WDCP	4	1	0	0	0	0.1536	0	0	0	0.0428025	0.367675	0.103369	1	0.337961	0.670332	0.844959	0.931863	1
KIF24	0	10	0	0	1	5.21385	0	0	1.30593	0.0429594	0.573447	0.0699835	0.409609	0.130488	0.670332	0.844959	0.887243	1
HMG20B	2	0	0	0	0	0	0	0	0	0.0429694	0.501226	0.114518	1	0.362681	0.670332	0.844959	0.931863	1
TRIM55	0	7	1	0	0	5.63929	7.35438	7.35438	0	0.0430159	0.184354	0.104878	1	0.341373	0.670332	0.844959	0.931863	1
SLITRK5	7	3	1	0	2	0.279196	1.89747	1.89747	3.7285	0.0430309	0.577933	0.0815078	0.124162	0.0566044	0.670332	0.844959	0.912682	1
TPCN2	6	2	0	0	1	0.23255	0	0	2.37426	0.0431312	0.160413	0.0715205	0.283919	0.0994352	0.670332	0.844959	0.890686	1
CCDC34	0	6	0	0	0	5.88543	0	0	0	0.0431663	0.654748	0.091864	1	0.311184	0.670332	0.844959	0.924428	1
POLR2C	0	5	0	0	0	6.25827	0	0	0	0.0431671	0.641007	0.0905612	1	0.308065	0.670332	0.844959	0.924428	1
MFSD14C	1	5	0	0	0	4.78682	0	0	0	0.043181	0.67033	0.105354	1	0.342446	0.670332	0.844959	0.931863	1
HS3ST2	2	0	0	0	0	0	0	0	0	0.0432853	0.554429	0.118405	1	0.37104	0.670332	0.844959	0.931863	1
WARS2	0	6	0	0	0	5.87727	0	0	0	0.0433492	0.677817	0.0967279	1	0.32267	0.670332	0.844959	0.929343	1
FAM50A	2	0	1	0	0	0	2.70385	2.70385	0	0.0433554	0.430759	0.0611762	1	0.232102	0.670332	0.844959	0.869264	1
TACR2	0	6	1	0	0	5.87681	15.3972	15.3972	0	0.0433597	0.083737	0.0644398	1	0.241135	0.670332	0.844959	0.878603	1
EFEMP1	1	9	0	0	0	3.9573	0	0	0	0.0433954	0.441949	0.0597041	1	0.227971	0.670332	0.844959	0.869264	1
MSMO1	0	5	0	0	0	6.24573	0	0	0	0.0434163	0.658987	0.0945463	1	0.317549	0.670332	0.844959	0.928005	1
SLC41A2	0	7	0	0	0	5.62109	0	0	0	0.0434616	0.617595	0.0834902	1	0.290799	0.670332	0.844959	0.919614	1
SLFNL1	2	0	0	0	0	0	0	0	0	0.04348	0.525998	0.117186	1	0.368433	0.670332	0.844959	0.931863	1
LIG4	1	0	0	0	0	0	0	0	0	0.0435268	0.502621	0.11941	1	0.373179	0.670332	0.844959	0.931863	1
SLC6A17	2	12	0	0	0	3.21452	0	0	0	0.0435768	0.46513	0.0713491	1	0.259723	0.670332	0.844959	0.890686	1
MAPK3	0	6	0	0	0	5.86599	0	0	0	0.0436037	0.681751	0.0979857	1	0.3256	0.670332	0.844959	0.929846	1
DNAJA2	5	1	0	0	0	0.163853	0	0	0	0.0436128	0.245988	0.0873386	1	0.300267	0.670332	0.844959	0.924428	1
DSTYK	2	14	0	0	0	3.12226	0	0	0	0.0437042	0.370796	0.0511874	1	0.20333	0.670332	0.844959	0.848326	1
OR56B1	0	5	1	0	1	6.22758	23.5719	23.5719	5.50098	0.0437804	0.0524809	0.0448501	0.150148	0.0404086	0.670332	0.844959	0.826589	1
CKB	2	0	0	0	0	0	0	0	0	0.043795	0.506738	0.116664	1	0.367312	0.670332	0.844959	0.931863	1
MRPS22	0	6	0	0	1	5.85518	0	0	4.9524	0.0438493	0.630046	0.088078	0.163654	0.0755241	0.670332	0.844959	0.924428	1
MTUS2	2	16	0	0	0	3.05362	0	0	0	0.0438616	0.380608	0.0525309	1	0.207306	0.670332	0.844959	0.84871	1
CCDC102B	2	11	0	0	0	3.26764	0	0	0	0.043888	0.364544	0.0519035	1	0.205453	0.670332	0.844959	0.84871	1
ZP4	10	4	1	0	1	0.332883	0.704352	0.704352	3.30465	0.0439184	0.724421	0.131012	0.224328	0.13305	0.670332	0.844959	0.931863	1
TMEM52B	0	4	0	0	0	6.81763	0	0	0	0.0439391	0.734483	0.110209	1	0.35326	0.670332	0.844959	0.931863	1
GRHL1	6	2	0	0	0	0.233857	0	0	0	0.0439922	0.161752	0.0728821	1	0.263754	0.670332	0.844959	0.894805	1
WSB2	2	0	0	0	0	0	0	0	0	0.0440288	0.45154	0.113256	1	0.359938	0.670332	0.844959	0.931863	1
SLCO2A1	0	7	0	0	0	5.59808	0	0	0	0.0440325	0.622344	0.0855337	1	0.295848	0.670332	0.844959	0.922207	1
SEC16A	14	13	0	0	0	0.46588	0	0	0	0.0440618	0.0406665	0.0314824	1	0.140359	0.670332	0.844959	0.736124	1
PTGER2	2	0	0	0	0	0	0	0	0	0.0440954	0.590076	0.122129	1	0.378926	0.670332	0.844959	0.931863	1
THBS4	2	14	0	1	0	3.11612	2.1092	2.1092	0	0.0441012	0.544709	0.13154	1	0.398362	0.670332	0.844959	0.931863	1
AAR2	2	0	0	0	0	0	0	0	0	0.0441094	0.561474	0.120645	1	0.375797	0.670332	0.844959	0.931863	1
MRPS12	2	6	0	0	0	3.89098	0	0	0	0.0441832	0.696777	0.113686	1	0.360876	0.670332	0.844959	0.931863	1
AQP5	0	5	0	0	0	6.20669	0	0	0	0.0442036	0.785734	0.11721	1	0.368484	0.670332	0.844959	0.931863	1
DENR	0	4	0	0	0	6.80048	0	0	0	0.0442311	0.663698	0.0988232	1	0.327542	0.670332	0.844959	0.929846	1
MAGEA3	0	5	0	0	0	6.20248	0	0	0	0.0442896	0.734611	0.109801	1	0.352361	0.670332	0.844959	0.931863	1
CELA3B	18	6	0	1	0	0.414077	0.606497	0.606497	0	0.0442897	0.598671	0.129371	1	0.393943	0.670332	0.844959	0.931863	1
CIPC	2	0	1	0	0	0	5.25417	5.25417	0	0.0443096	0.218573	0.0362458	1	0.156489	0.670332	0.844959	0.760455	1
TNN	2	15	0	0	0	3.07719	0	0	0	0.0443416	0.373944	0.052097	1	0.206025	0.670332	0.844959	0.84871	1
OR2T11	0	5	0	0	0	6.21336	0	0	0	0.0440679	0.79752	0.118448	1	0.37113	0.670332	0.845332	0.931863	1
LRRC10	0	5	0	0	0	6.27998	0	0	0	0.0427393	0.807395	0.116577	1	0.367125	0.670332	0.84813	0.931863	1
OR10H4	0	5	0	0	0	6.23221	0	0	0	0.0436871	0.828267	0.121206	1	0.376982	0.670332	0.856418	0.931863	1
HIST1H4D	1	5	0	0	0	4.78936	0	0	0	0.0431093	0.838735	0.123385	1	0.381561	0.670332	0.862981	0.931863	1
IFRD2	6	2	0	0	0	0.234505	0	0	0	0.0444218	0.256667	0.0903558	1	0.307571	0.670543	0.844959	0.924428	1
NIPBL	9	10	0	1	3	0.402001	0.313564	0.313564	1.9121	0.0444241	0.195409	0.10742	0.224598	0.113984	0.670543	0.844959	0.931863	1
DAZAP1	0	6	1	0	3	5.82581	7.83734	7.83734	13.1457	0.0445242	0.172538	0.102696	0.00804858	0.00669367	0.671537	0.844959	0.931863	0.488588
TARBP2	2	0	0	0	1	0	0	0	4.87144	0.0447178	0.466383	0.115813	0.165856	0.0951273	0.673556	0.844959	0.931863	1
SLC27A6	3	14	0	0	0	2.83307	0	0	0	0.044727	0.327416	0.0495084	1	0.198311	0.673556	0.844959	0.840135	1
HLA-E	2	0	0	0	0	0	0	0	0	0.0448986	0.495194	0.118265	1	0.370741	0.674739	0.844959	0.931863	1
C1QTNF8	1	7	0	0	1	4.19418	0	0	6.95649	0.0448987	0.621658	0.0993307	0.123188	0.0661172	0.674739	0.844959	0.929846	1
PMEPA1	1	7	0	0	0	4.19342	0	0	0	0.0449273	0.663459	0.106271	1	0.344506	0.674739	0.844959	0.931863	1
PSD	1	12	0	0	4	3.69604	0	0	6.97685	0.0449435	0.48108	0.0679356	0.0222201	0.0113154	0.674739	0.844959	0.883577	0.645342
KIF21B	2	16	0	0	0	3.03658	0	0	0	0.0450356	0.33087	0.0432565	1	0.179108	0.674988	0.844959	0.816852	1
UBE2T	0	4	0	0	0	6.75261	0	0	0	0.045059	0.66792	0.101238	1	0.333102	0.674988	0.844959	0.931863	1
OR51B2	0	5	0	0	1	6.16498	0	0	5.71188	0.0450636	0.798731	0.1209	0.145532	0.0886806	0.674988	0.845332	0.931863	1
NFKBIA	1	7	4	3	4	4.17328	38.8269	38.8269	22.4883	0.0456935	3.38e-07	2.23e-06	0.000799856	3.77e-08	0.67509	0.000612787	0.000969579	2.17e-05
KRT73	1	9	2	1	0	3.89168	17.1863	17.1863	0	0.0462387	0.00297411	0.00727696	1	0.0431017	0.67509	0.418965	0.393237	1
TLNRD1	2	0	0	0	0	0	0	0	0	0.0451118	0.66397	0.127848	1	0.390821	0.67509	0.844959	0.931863	1
GALNT11	4	1	0	0	0	0.156591	0	0	0	0.0452185	0.246206	0.0929868	1	0.313858	0.67509	0.844959	0.924428	1
IQCB1	0	7	0	0	0	5.54719	0	0	0	0.0453255	0.541794	0.0691201	1	0.253803	0.67509	0.844959	0.8849	1
CPNE8	0	7	2	0	0	5.54616	10.7952	10.7952	0	0.0453523	0.0441417	0.059143	1	0.226388	0.67509	0.844959	0.86872	1
FGF2	2	0	0	0	0	0	0	0	0	0.045393	0.610116	0.126093	1	0.387198	0.67509	0.844959	0.931863	1
PCDHGA7	8	4	0	0	1	0.319221	0	0	1.9162	0.0454246	0.26454	0.0920167	0.32679	0.135443	0.67509	0.844959	0.924428	1
C14orf28	0	5	0	0	0	6.14694	0	0	0	0.0454416	0.649815	0.0966194	1	0.322417	0.67509	0.844959	0.929343	1
ELP3	0	7	0	0	0	5.53986	0	0	0	0.0455153	0.570963	0.0763338	1	0.272713	0.67509	0.844959	0.900808	1
FLCN	0	7	1	0	3	5.53858	8.79317	8.79317	9.24733	0.0455486	0.1529	0.0993921	0.0177284	0.0129358	0.67509	0.844959	0.929846	0.703342
TMEM225B	0	4	0	0	0	6.71877	0	0	0	0.0456558	0.723639	0.112193	1	0.357619	0.67509	0.844959	0.931863	1
RHAG	1	8	0	0	0	4.02047	0	0	0	0.0456652	0.533765	0.0832193	1	0.290125	0.67509	0.844959	0.919219	1
QRICH2	4	24	0	0	1	2.43956	0	0	0.97695	0.0456714	0.221058	0.0293801	0.475071	0.0735808	0.67509	0.844959	0.713068	1
GJC3	0	5	0	0	0	6.13453	0	0	0	0.0457039	0.745967	0.114696	1	0.363067	0.67509	0.844959	0.931863	1
KCTD12	2	0	0	0	1	0	0	0	5.4841	0.045711	0.633168	0.127917	0.15053	0.0953132	0.67509	0.844959	0.931863	1
FAM120C	6	3	0	0	0	0.272506	0	0	0	0.0457208	0.173092	0.0793318	1	0.280368	0.67509	0.844959	0.90685	1
TMEM198	0	6	0	0	0	5.77211	0	0	0	0.0457898	0.711313	0.107975	1	0.348312	0.67509	0.844959	0.931863	1
GATD1	0	5	0	0	0	6.12872	0	0	0	0.0458272	0.716075	0.109948	1	0.352686	0.67509	0.844959	0.931863	1
HINFP	0	7	0	0	0	5.52644	0	0	0	0.045865	0.614732	0.0870616	1	0.299591	0.67509	0.844959	0.924428	1
SPPL2C	2	12	0	0	0	3.17719	0	0	0	0.0458833	0.572137	0.0955182	1	0.319837	0.67509	0.844959	0.929343	1
ATM	8	43	4	2	4	1.97281	1.99823	1.99823	2.33931	0.0459326	0.202471	0.126683	0.162841	0.100692	0.67509	0.844959	0.931863	1
IL4R	3	15	0	0	0	2.78342	0	0	0	0.0459406	0.347855	0.0546745	1	0.213578	0.67509	0.844959	0.857223	1
ABCC5	9	6	0	0	1	0.365639	0	0	1.24327	0.0459573	0.0700874	0.0479086	0.420612	0.0988302	0.67509	0.844959	0.837082	1
CSH2	3	0	0	0	0	0	0	0	0	0.0460785	0.501906	0.118896	1	0.372086	0.67509	0.844959	0.931863	1
NIF3L1	2	0	0	0	0	0	0	0	0	0.0460995	0.476972	0.119491	1	0.373352	0.67509	0.844959	0.931863	1
NKPD1	6	2	0	0	2	0.237097	0	0	5.8521	0.0461654	0.42709	0.113644	0.0683284	0.0454891	0.67509	0.844959	0.931863	1
PHKG1	0	6	0	0	0	5.75556	0	0	0	0.0461881	0.631158	0.0925622	1	0.312849	0.67509	0.844959	0.924428	1
STK24	0	6	0	0	0	5.75461	0	0	0	0.0462113	0.621655	0.0905154	1	0.307955	0.67509	0.844959	0.924428	1
NIM1K	0	6	0	0	0	5.75246	0	0	0	0.0462632	0.685966	0.10411	1	0.339639	0.67509	0.844959	0.931863	1
U2AF2	1	9	1	0	0	3.89084	5.1703	5.1703	0	0.0462764	0.233931	0.11291	1	0.359186	0.67509	0.844959	0.931863	1
ITPKA	1	9	0	0	0	3.89074	0	0	0	0.0462807	0.609944	0.0984119	1	0.326589	0.67509	0.844959	0.929846	1
CHMP1B	3	0	0	0	0	0	0	0	0	0.0463587	0.615919	0.127173	1	0.389431	0.67509	0.844959	0.931863	1
B3GALT4	2	0	0	0	0	0	0	0	0	0.0463618	0.531673	0.123843	1	0.38252	0.67509	0.844959	0.931863	1
CCDC134	3	0	0	0	0	0	0	0	0	0.0463866	0.489415	0.118535	1	0.371316	0.67509	0.844959	0.931863	1
OR10V1	0	5	1	0	0	6.10124	24.5154	24.5154	0	0.0464163	0.0502575	0.0452371	1	0.185284	0.67509	0.844959	0.828301	1
ANKAR	5	3	1	0	0	0.258291	0.760162	0.760162	0	0.0455195	0.792885	0.127187	1	0.38946	0.67509	0.845222	0.931863	1
NOG	0	5	0	0	1	6.16024	0	0	7.67304	0.0451625	0.794843	0.12062	0.113187	0.0722745	0.67509	0.845332	0.931863	1
MADD	3	20	0	1	0	2.66507	1.22302	1.22302	0	0.0460585	0.859674	0.116606	1	0.367187	0.67509	0.876499	0.931863	1
TAS2R38	0	5	2	0	0	6.08587	55.067	55.067	0	0.0467497	0.00174238	0.00394854	1	0.0258014	0.6754	0.293832	0.285023	0.970628
LCE2D	1	4	0	0	0	5.17741	0	0	0	0.0465286	0.787501	0.127633	1	0.390379	0.6754	0.844959	0.931863	1
AC005726.1	1	4	0	0	0	5.17725	0	0	0	0.0465328	0.666609	0.113092	1	0.359583	0.6754	0.844959	0.931863	1
RWDD1	3	0	0	1	1	0	2.87239	2.87239	7.32712	0.0465714	0.397698	0.0695072	0.117803	0.047533	0.6754	0.844959	0.887187	1
GAN	4	1	0	0	0	0.158239	0	0	0	0.0465776	0.246316	0.0951534	1	0.318979	0.6754	0.844959	0.929343	1
RPLP1	1	4	0	0	0	5.172	0	0	0	0.0466652	0.710907	0.119393	1	0.373143	0.6754	0.844959	0.931863	1
TUBGCP4	4	1	0	0	0	0.158438	0	0	0	0.0467427	0.203537	0.0881873	1	0.302332	0.6754	0.844959	0.924428	1
SMIM17	1	4	0	0	0	5.16735	0	0	0	0.0467829	0.690885	0.117017	1	0.368069	0.6754	0.844959	0.931863	1
CGB1	0	4	0	0	1	6.66177	0	0	11.4604	0.0466833	0.803057	0.12589	0.0792092	0.055921	0.6754	0.846549	0.931863	1
PTPRB	5	27	0	1	1	2.27898	0.794303	0.794303	0.806777	0.046642	0.826367	0.087699	0.518283	0.185951	0.6754	0.85582	0.924428	1
IL10RA	1	9	0	0	0	3.87817	0	0	0	0.0468488	0.570016	0.0917171	1	0.310833	0.675852	0.844959	0.924428	1
MTIF2	0	8	1	0	1	5.31482	5.53809	5.53809	2.45579	0.0469013	0.246322	0.127636	0.27745	0.153715	0.676112	0.844959	0.931863	1
SDHAF4	0	3	0	0	0	7.71876	0	0	0	0.0470029	0.747664	0.120461	1	0.375407	0.676578	0.844959	0.931863	1
CCL22	0	3	0	0	0	7.71918	0	0	0	0.0469969	0.810274	0.1284	1	0.391955	0.676578	0.848986	0.931863	1
HIST1H1D	6	12	1	0	1	2.50774	9.26987	9.26987	8.05323	0.047105	0.109385	0.0561961	0.108513	0.0371965	0.677092	0.844959	0.86079	1
MLN	0	3	1	0	0	7.70161	20.951	20.951	0	0.0472429	0.0597556	0.04767	1	0.192751	0.677092	0.844959	0.837082	1
GPR17	2	0	0	0	0	0	0	0	0	0.0472492	0.636806	0.131631	1	0.398547	0.677092	0.844959	0.931863	1
ATP13A2	4	18	0	1	1	2.51924	1.62274	1.62274	1.51382	0.0472748	0.675283	0.138178	0.376977	0.206005	0.677092	0.844959	0.931863	1
MED19	0	5	0	0	0	6.05939	0	0	0	0.0473308	0.75585	0.119821	1	0.374052	0.677092	0.844959	0.931863	1
MCIDAS	0	6	0	0	0	5.7074	0	0	0	0.0473705	0.719347	0.11274	1	0.358814	0.677092	0.844959	0.931863	1
SYCP3	3	0	0	0	1	0	0	0	7.54354	0.0473813	0.353565	0.106736	0.114872	0.0662254	0.677092	0.844959	0.931863	1
ABI3	2	0	0	0	0	0	0	0	0	0.0474176	0.519426	0.125314	1	0.385583	0.677092	0.844959	0.931863	1
FAM104B	0	3	1	0	0	7.68781	20.2517	20.2517	0	0.047437	0.0620284	0.0491966	1	0.197373	0.677092	0.844959	0.840135	1
NECTIN3	2	11	0	0	0	3.20901	0	0	0	0.0474425	0.437152	0.0717955	1	0.2609	0.677092	0.844959	0.890739	1
MRI1	5	1	0	0	0	0.168535	0	0	0	0.0474539	0.405467	0.114	1	0.361557	0.677092	0.844959	0.931863	1
C19orf33	0	3	0	0	0	7.69242	0	0	0	0.0473721	0.792181	0.127171	1	0.389425	0.677092	0.845222	0.931863	1
ZNF598	0	8	0	0	1	5.29439	0	0	2.10332	0.0474912	0.657185	0.0985913	0.307788	0.136405	0.67713	0.844959	0.929846	1
KDM3B	1	14	1	0	3	3.55521	2.65608	2.65608	3.04396	0.0475308	0.453814	0.1404	0.127298	0.0898008	0.677202	0.844959	0.931863	1
EPN3	0	7	0	0	1	5.46212	0	0	2.82436	0.0475843	0.68168	0.104885	0.251565	0.122295	0.677319	0.844959	0.931863	1
SLC12A8	0	7	0	0	0	5.4593	0	0	0	0.0476613	0.63058	0.0938446	1	0.315892	0.677319	0.844959	0.926456	1
QPCTL	0	6	0	0	0	5.69338	0	0	0	0.047721	0.704437	0.110651	1	0.354236	0.677319	0.844959	0.931863	1
POM121C	6	3	0	0	0	0.27567	0	0	0	0.0477226	0.251566	0.0963901	1	0.32188	0.677319	0.844959	0.929343	1
IKZF2	0	7	0	0	0	5.4568	0	0	0	0.0477297	0.626116	0.0929417	1	0.313751	0.677319	0.844959	0.924428	1
DBX1	2	0	0	0	0	0	0	0	0	0.0477523	0.58082	0.129872	1	0.394968	0.677319	0.844959	0.931863	1
PNRC1	2	0	0	0	1	0	0	0	5.45066	0.0478468	0.604685	0.131392	0.151293	0.0977656	0.677319	0.844959	0.931863	1
CPEB4	0	8	0	1	1	5.28153	6.41891	6.41891	2.44907	0.0478667	0.212102	0.122429	0.277972	0.149075	0.677319	0.844959	0.931863	1
C10orf88	0	6	1	0	0	5.68649	9.15881	9.15881	0	0.0478944	0.146455	0.099156	1	0.328312	0.677319	0.844959	0.929846	1
ITPR1	4	24	0	2	0	2.41924	1.7932	1.7932	0	0.047906	0.504145	0.140522	1	0.416281	0.677319	0.844959	0.931863	1
VIPR2	1	9	1	0	0	3.85491	4.5117	4.5117	0	0.0479199	0.269321	0.123489	1	0.381778	0.677319	0.844959	0.931863	1
GNAQ	2	0	0	0	0	0	0	0	0	0.048087	0.442317	0.120762	1	0.376045	0.678369	0.844959	0.931863	1
UXS1	5	1	0	1	0	0.169345	1.34683	1.34683	0	0.0481342	0.79004	0.111408	1	0.355899	0.678369	0.844959	0.931863	1
PLA2G12A	0	4	0	0	0	6.58173	0	0	0	0.0481749	0.734973	0.119426	1	0.373213	0.678369	0.844959	0.931863	1
DTX1	7	21	0	0	1	2.18017	0	0	2.87893	0.0481808	0.303913	0.0587403	0.248139	0.0762079	0.678369	0.844959	0.868242	1
ZNF829	1	9	0	0	0	3.84911	0	0	0	0.048191	0.474736	0.0734078	1	0.265129	0.678369	0.844959	0.895305	1
CEP170B	1	13	1	0	2	3.5839	4.99477	4.99477	2.24741	0.0482201	0.242486	0.121168	0.217435	0.122152	0.678369	0.844959	0.931863	1
SESN1	4	1	2	0	0	0.160221	3.01334	3.01334	0	0.048237	0.228363	0.0283946	1	0.129524	0.678369	0.844959	0.704892	1
TRPV2	4	1	1	0	0	0.160396	1.50799	1.50799	0	0.0483845	0.720006	0.0997825	1	0.329758	0.679931	0.844959	0.930808	1
IL1RAPL1	7	3	0	0	0	0.287783	0	0	0	0.0484278	0.139373	0.0722972	1	0.26222	0.679931	0.844959	0.893293	1
ADAMTS1	10	6	0	0	1	0.378849	0	0	1.84692	0.0484791	0.138193	0.0696254	0.334444	0.110838	0.679931	0.844959	0.887187	1
TGFB2	2	10	0	0	2	3.26003	0	0	8.07141	0.0484871	0.466762	0.080357	0.0424285	0.0227791	0.679931	0.844959	0.908113	0.918224
KIR2DL3	1	7	0	0	0	4.10131	0	0	0	0.0485535	0.566575	0.0958277	1	0.320563	0.680376	0.844959	0.929343	1
LRRIQ3	2	12	7	0	0	3.13367	15.2975	15.2975	0	0.0487353	3.55e-05	0.000188531	1	0.00180542	0.680396	0.0223765	0.0347929	0.216673
CTSW	2	0	0	0	0	0	0	0	0	0.0485982	0.435981	0.121224	1	0.37702	0.680396	0.844959	0.931863	1
STX3	0	5	0	0	0	6.0003	0	0	0	0.0486585	0.625684	0.0974345	1	0.324318	0.680396	0.844959	0.929846	1
HCFC1	5	23	1	0	0	2.30528	1.58754	1.58754	0	0.0487454	0.685342	0.142169	1	0.419504	0.680396	0.844959	0.931863	1
HTN1	0	2	0	0	0	10.2251	0	0	0	0.0487518	0.77016	0.129426	1	0.394057	0.680396	0.844959	0.931863	1
PSEN2	0	6	1	0	0	5.65207	10.9116	10.9116	0	0.0487719	0.121528	0.0898321	1	0.306311	0.680396	0.844959	0.924428	1
CPNE5	3	13	0	1	1	2.82089	1.92305	1.92305	3.00979	0.0487984	0.584165	0.14351	0.240296	0.150603	0.680396	0.844959	0.931863	1
IDE	3	1	0	0	1	0.148148	0	0	1.75276	0.0489121	0.206835	0.0966713	0.345446	0.146915	0.680656	0.844959	0.929343	1
STAB1	3	20	0	2	1	2.63446	2.54413	2.54413	0.695378	0.0489146	0.310681	0.138401	0.551358	0.272648	0.680656	0.844959	0.931863	1
ZNF24	2	0	0	0	0	0	0	0	0	0.0489215	0.415002	0.119916	1	0.374255	0.680656	0.844959	0.931863	1
GBX2	2	0	0	0	0	0	0	0	0	0.0489886	0.639114	0.135724	1	0.406783	0.681106	0.844959	0.931863	1
PCDHGA3	3	15	0	0	2	2.74478	0	0	3.83241	0.0491951	0.459794	0.0828683	0.120029	0.0558057	0.683491	0.844959	0.917092	1
HIST1H1C	5	11	0	0	1	2.62689	0	0	8.35429	0.0492478	0.684806	0.126086	0.105077	0.0705344	0.683738	0.844959	0.931863	1
SYT17	2	10	2	2	0	3.23649	15.2356	15.2356	0	0.0499614	0.000830604	0.00255696	1	0.0178193	0.683933	0.191156	0.217051	0.823961
SERPINA10	0	6	2	0	0	5.57705	23.553	23.553	0	0.0507494	0.0098259	0.0192942	1	0.0954666	0.683933	0.753915	0.612364	1
HOOK2	0	8	0	0	0	5.23129	0	0	0	0.0493655	0.561368	0.0786557	1	0.278652	0.683933	0.844959	0.904564	1
CHM	1	10	1	0	0	3.73557	2.70139	2.70139	0	0.0494769	0.446665	0.144948	1	0.424897	0.683933	0.844959	0.931863	1
NEB	13	62	3	0	8	1.73112	0.679863	0.679863	1.67066	0.049477	0.527379	0.0428843	0.2198	0.0533913	0.683933	0.844959	0.815261	1
GPR157	2	0	0	0	0	0	0	0	0	0.0494855	0.600886	0.134863	1	0.40506	0.683933	0.844959	0.931863	1
CBWD3	2	0	0	0	0	0	0	0	0	0.0495088	0.371541	0.116552	1	0.367071	0.683933	0.844959	0.931863	1
ACTL9	1	8	0	0	0	3.92894	0	0	0	0.049648	0.690505	0.119768	1	0.37394	0.683933	0.844959	0.931863	1
LSM7	0	3	0	0	0	7.5336	0	0	0	0.0496811	0.765536	0.128895	1	0.392969	0.683933	0.844959	0.931863	1
CREG2	2	0	0	0	0	0	0	0	0	0.0496885	0.581878	0.134224	1	0.403779	0.683933	0.844959	0.931863	1
ZNF25	5	1	1	1	1	0.171243	2.84486	2.84486	3.91207	0.0497462	0.244405	0.0362188	0.197339	0.0424626	0.683933	0.844959	0.760455	1
AMT	0	6	0	0	0	5.61311	0	0	0	0.0497877	0.693199	0.112586	1	0.358478	0.683933	0.844959	0.931863	1
BRAT1	11	6	0	0	0	0.388744	0	0	0	0.049814	0.126216	0.0663199	1	0.246263	0.683933	0.844959	0.881511	1
SNX30	0	6	0	0	0	5.6102	0	0	0	0.0498644	0.65794	0.105238	1	0.342184	0.683933	0.844959	0.931863	1
C15orf62	0	4	1	0	0	6.49133	22.691	22.691	0	0.0499308	0.0547308	0.0490405	1	0.196903	0.683933	0.844959	0.840135	1
CD1D	1	7	0	0	2	4.06811	0	0	10.6418	0.0499401	0.553498	0.0955488	0.0273634	0.0181624	0.683933	0.844959	0.929343	0.832066
CSF1R	2	13	0	0	0	3.0699	0	0	0	0.0499879	0.368201	0.0582007	1	0.223715	0.683933	0.844959	0.865656	1
KIF17	10	6	0	0	0	0.381314	0	0	0	0.0500162	0.140839	0.0719868	1	0.261404	0.683933	0.844959	0.89127	1
TMEM56-RWDD3	1	5	0	0	0	4.56364	0	0	0	0.050046	0.574143	0.102729	1	0.336505	0.683933	0.844959	0.931863	1
EIF2A	6	2	0	0	0	0.242723	0	0	0	0.0500764	0.148453	0.0770593	1	0.274576	0.683933	0.844959	0.901172	1
PSMC1	0	6	0	0	0	5.60055	0	0	0	0.0501201	0.629847	0.0993408	1	0.328739	0.683933	0.844959	0.929846	1
TMCO1	1	6	0	1	0	4.26132	5.02069	5.02069	0	0.0502607	0.241186	0.118149	1	0.370493	0.683933	0.844959	0.931863	1
WHAMM	5	2	0	0	0	0.231978	0	0	0	0.0502728	0.247302	0.100642	1	0.331736	0.683933	0.844959	0.931863	1
GOLPH3	2	0	0	0	0	0	0	0	0	0.0502768	0.536294	0.132588	1	0.400484	0.683933	0.844959	0.931863	1
EBF3	1	9	0	0	0	3.80509	0	0	0	0.0503044	0.512212	0.0850481	1	0.294652	0.683933	0.844959	0.922207	1
VSTM4	1	7	0	0	0	4.05905	0	0	0	0.0503261	0.595484	0.104768	1	0.341125	0.683933	0.844959	0.931863	1
SLC25A1	2	0	0	0	0	0	0	0	0	0.0503939	0.534318	0.132702	1	0.400713	0.683933	0.844959	0.931863	1
DHX30	1	12	2	0	0	3.59233	7.83967	7.83967	0	0.0503991	0.0547914	0.0652756	1	0.243422	0.683933	0.844959	0.87985	1
PREX2	1	14	0	0	3	3.50493	0	0	3.33756	0.0504111	0.351813	0.0433237	0.111745	0.0306478	0.683933	0.844959	0.816852	1
HEXDC	1	9	0	1	0	3.80229	4.93092	4.93092	0	0.0504421	0.245744	0.123472	1	0.381744	0.683933	0.844959	0.931863	1
S1PR2	2	0	0	0	0	0	0	0	0	0.0505185	0.653984	0.139927	1	0.415112	0.683933	0.844959	0.931863	1
HOMER3	1	8	0	0	0	3.90951	0	0	0	0.0505421	0.549909	0.0947367	1	0.317998	0.683933	0.844959	0.928477	1
C3orf52	2	7	0	0	1	3.55179	0	0	7.12278	0.0505777	0.548311	0.102875	0.120712	0.0669171	0.683933	0.844959	0.931863	1
CORO7	2	13	0	0	0	3.06163	0	0	0	0.0505864	0.363979	0.0578747	1	0.222787	0.683933	0.844959	0.865494	1
ATAD3B	6	20	0	0	0	2.24636	0	0	0	0.05061	0.206648	0.0367556	1	0.158176	0.683933	0.844959	0.763284	1
NASP	0	8	0	0	0	5.19041	0	0	0	0.0506236	0.558467	0.0797915	1	0.281531	0.683933	0.844959	0.907821	1
POLA1	5	3	0	0	1	0.266334	0	0	1.21703	0.0506621	0.0980664	0.0685701	0.4254	0.132274	0.683933	0.844959	0.884225	1
CNKSR1	1	10	0	0	1	3.71209	0	0	2.47964	0.0506835	0.426568	0.0644513	0.275614	0.0893619	0.683933	0.844959	0.878603	1
HOMER1	2	0	0	1	0	0	2.76008	2.76008	0	0.0507107	0.422227	0.0709751	1	0.258735	0.683933	0.844959	0.890686	1
ZBTB26	0	6	0	0	0	5.57816	0	0	0	0.0507194	0.699598	0.115754	1	0.365353	0.683933	0.844959	0.931863	1
CSN2	0	4	0	0	0	6.45002	0	0	0	0.0507594	0.694547	0.117638	1	0.3694	0.683933	0.844959	0.931863	1
PRELP	2	0	0	0	0	0	0	0	0	0.0507875	0.571449	0.136	1	0.407334	0.683933	0.844959	0.931863	1
C3	4	20	2	0	0	2.44888	2.2267	2.2267	0	0.0507902	0.368935	0.145002	1	0.425002	0.683933	0.844959	0.931863	1
PDCD10	3	0	0	0	1	0	0	0	8.39351	0.0508153	0.381611	0.116305	0.104645	0.0658285	0.683933	0.844959	0.931863	1
TMEM62	0	7	0	0	0	5.34679	0	0	0	0.0508522	0.607942	0.0940096	1	0.316282	0.683933	0.844959	0.926456	1
TTBK1	4	20	0	1	3	2.44801	1.85499	1.85499	4.05708	0.0508885	0.598538	0.14865	0.083083	0.0666185	0.683933	0.844959	0.931863	1
REP15	0	4	0	0	0	6.44061	0	0	0	0.0509504	0.762453	0.129813	1	0.394847	0.683933	0.844959	0.931863	1
TRIM64C	1	8	1	0	0	3.89951	4.30419	4.30419	0	0.0510087	0.282605	0.131251	1	0.397776	0.683933	0.844959	0.931863	1
ANAPC2	2	13	0	0	0	3.0557	0	0	0	0.0510195	0.441216	0.0764252	1	0.272948	0.683933	0.844959	0.900808	1
CLEC3A	0	4	0	0	0	6.43637	0	0	0	0.0510369	0.714143	0.121851	1	0.378342	0.683933	0.844959	0.931863	1
KCNC4	4	1	0	0	0	0.163573	0	0	0	0.0511047	0.447964	0.127279	1	0.389648	0.683933	0.844959	0.931863	1
MYC	4	13	1	0	0	2.62649	2.84505	2.84505	0	0.0511056	0.396211	0.136834	1	0.408995	0.683933	0.844959	0.931863	1
GRXCR1	0	5	0	0	1	5.89586	0	0	6.1437	0.0511149	0.677785	0.113294	0.136914	0.0801355	0.683933	0.844959	0.931863	1
RUFY1	2	12	0	1	1	3.09881	2.10446	2.10446	2.52161	0.0511538	0.545834	0.149267	0.272441	0.170895	0.683985	0.844959	0.931863	1
DEFB118	0	3	0	0	0	7.42923	0	0	0	0.0512793	0.774049	0.133617	1	0.402559	0.684499	0.844959	0.931863	1
FSCN3	2	11	0	0	0	3.15033	0	0	0	0.0513069	0.417611	0.0726576	1	0.263166	0.684499	0.844959	0.893355	1
BGN	2	0	0	0	0	0	0	0	0	0.0513174	0.536017	0.134787	1	0.404907	0.684499	0.844959	0.931863	1
AP001781.2	0	8	1	0	0	5.16789	5.10018	5.10018	0	0.0513322	0.26742	0.140657	1	0.416545	0.684499	0.844959	0.931863	1
KCNMB4	3	0	0	0	0	0	0	0	0	0.0514012	0.538457	0.132972	1	0.401259	0.684765	0.844959	0.931863	1
PTER	2	0	0	0	0	0	0	0	0	0.0514221	0.503993	0.132636	1	0.40058	0.684765	0.844959	0.931863	1
RHBDD3	2	0	0	0	1	0	0	0	4.61968	0.051475	0.523991	0.134256	0.1731	0.110665	0.684778	0.844959	0.931863	1
MRPL9	0	5	0	0	2	5.87834	0	0	13.3419	0.0515413	0.682736	0.115159	0.0187911	0.0154416	0.684778	0.844959	0.931863	0.764649
KCTD16	1	8	0	0	1	3.88806	0	0	4.16741	0.0515493	0.588191	0.104584	0.187845	0.0968504	0.684778	0.844959	0.931863	1
ZNF577	3	12	0	0	0	2.83153	0	0	0	0.0515979	0.35578	0.0645851	1	0.241534	0.684778	0.844959	0.879203	1
HDGFL1	0	5	1	0	1	5.87602	25.3573	25.3573	7.09452	0.0515981	0.0484191	0.0473675	0.121126	0.0353469	0.684778	0.844959	0.837082	1
NEK6	2	0	0	1	0	0	3.12683	3.12683	0	0.0517379	0.373396	0.0658412	1	0.244963	0.685968	0.844959	0.879972	1
STEAP4	0	6	0	0	0	5.54007	0	0	0	0.051758	0.643004	0.105359	1	0.342457	0.685968	0.844959	0.931863	1
FAM170B	0	5	0	0	0	5.86576	0	0	0	0.05185	0.726738	0.124453	1	0.383791	0.686077	0.844959	0.931863	1
ZC3H7A	3	1	0	0	1	0.151563	0	0	1.83932	0.0518672	0.205156	0.100673	0.335305	0.148142	0.686077	0.844959	0.931863	1
VSIG10L	5	2	0	0	0	0.234227	0	0	0	0.0518802	0.32801	0.115267	1	0.364302	0.686077	0.844959	0.931863	1
NDEL1	2	0	0	0	0	0	0	0	0	0.0519366	0.413273	0.12554	1	0.386051	0.686077	0.844959	0.931863	1
SIAH2	1	7	0	0	0	4.02062	0	0	0	0.0520016	0.70078	0.126902	1	0.388872	0.686077	0.844959	0.931863	1
C4orf17	2	0	0	0	1	0	0	0	4.96616	0.0520022	0.450443	0.129278	0.163285	0.102549	0.686077	0.844959	0.931863	1
EEA1	8	6	0	0	0	0.365152	0	0	0	0.0521525	0.0294021	0.0330919	1	0.145885	0.686077	0.844959	0.740668	1
COPE	8	2	0	0	0	0.261304	0	0	0	0.0521719	0.226389	0.092671	1	0.313108	0.686077	0.844959	0.924428	1
ZNF724	0	7	0	0	0	5.3015	0	0	0	0.0522044	0.626596	0.100947	1	0.332434	0.686077	0.844959	0.931863	1
CBX2	8	3	0	0	0	0.302409	0	0	0	0.0522171	0.306468	0.108393	1	0.349241	0.686077	0.844959	0.931863	1
FBXO22	0	6	0	0	1	5.52337	0	0	4.42529	0.0522212	0.676088	0.113724	0.179143	0.099696	0.686077	0.844959	0.931863	1
KANSL3	1	11	0	0	0	3.61557	0	0	0	0.0522258	0.453855	0.0722276	1	0.262037	0.686077	0.844959	0.89312	1
KDM4D	4	1	0	0	1	0.164922	0	0	3.41187	0.052281	0.391426	0.123947	0.219038	0.12506	0.686077	0.844959	0.931863	1
POM121L12	5	13	0	0	0	2.49866	0	0	0	0.0522922	0.475672	0.0985399	1	0.326886	0.686077	0.844959	0.929846	1
PCNX2	4	22	0	1	1	2.40691	1.05832	1.05832	0.836211	0.05222	0.958932	0.124334	0.51023	0.238383	0.686077	0.963067	0.931863	1
CYBC1	0	4	0	0	0	6.36994	0	0	0	0.0524147	0.732437	0.127988	1	0.391108	0.687223	0.844959	0.931863	1
KRTAP4-11	2	7	0	0	0	3.51645	0	0	0	0.0524613	0.602685	0.116279	1	0.366484	0.687373	0.844959	0.931863	1
DXO	1	8	0	0	0	3.86661	0	0	0	0.052579	0.563412	0.101128	1	0.33285	0.688455	0.844959	0.931863	1
CCDC106	2	0	0	0	1	0	0	0	6.36234	0.0526264	0.576619	0.140326	0.132929	0.0929261	0.688614	0.844959	0.931863	1
MEX3B	1	9	1	0	0	3.75582	13.7853	13.7853	0	0.0527903	0.0811264	0.0642861	1	0.240714	0.689322	0.844959	0.878603	1
NIPAL1	2	0	1	1	0	0	8.20137	8.20137	0	0.0528024	0.042621	0.00694054	1	0.0414376	0.689322	0.844959	0.383533	1
TCF23	1	6	0	0	0	4.19702	0	0	0	0.0528167	0.657857	0.122179	1	0.379032	0.689322	0.844959	0.931863	1
ANTXR1	1	9	0	0	0	3.75522	0	0	0	0.0528215	0.459338	0.0761737	1	0.272301	0.689322	0.844959	0.900808	1
WDR5B	0	5	0	0	0	5.82507	0	0	0	0.0528638	0.728136	0.126821	1	0.388703	0.689414	0.844959	0.931863	1
USP15	1	12	1	0	0	3.54809	2.12161	2.12161	0	0.0529359	0.557027	0.15086	1	0.436197	0.689895	0.844959	0.931863	1
PIM2	2	0	0	0	0	0	0	0	0	0.053003	0.514105	0.136702	1	0.408733	0.690116	0.844959	0.931863	1
C11orf40	3	0	0	0	0	0	0	0	0	0.0530234	0.521595	0.134958	1	0.40525	0.690116	0.844959	0.931863	1
SPATA31D3	1	0	1	0	0	0	4.18442	4.18442	0	0.0531028	0.290837	0.0437899	1	0.18078	0.690689	0.844959	0.818163	1
SRSF12	2	0	0	0	0	0	0	0	0	0.0531387	0.441769	0.13069	1	0.396635	0.690697	0.844959	0.931863	1
AL360181.3	1	7	0	0	0	3.99187	0	0	0	0.0532954	0.561218	0.10294	1	0.336986	0.691631	0.844959	0.931863	1
SPAG9	1	13	0	0	2	3.49562	0	0	2.70472	0.053336	0.349517	0.0459441	0.179638	0.0478456	0.691631	0.844959	0.832956	1
HSPB8	0	4	0	0	0	6.32627	0	0	0	0.0533454	0.763004	0.135104	1	0.405543	0.691631	0.844959	0.931863	1
USP28	0	9	1	0	0	4.98554	3.89192	3.89192	0	0.053352	0.347578	0.153831	1	0.441787	0.691631	0.844959	0.931863	1
NOL3	2	0	1	0	0	0	5.7257	5.7257	0	0.0534534	0.199445	0.0411483	1	0.172435	0.691889	0.844959	0.804943	1
PPP6R3	1	0	0	0	4	0	0	0	8.12645	0.053516	0.378486	0.13109	0.0153779	0.0145279	0.691889	0.844959	0.931863	0.742023
GDE1	2	0	0	0	0	0	0	0	0	0.0535482	0.512411	0.137698	1	0.410711	0.691889	0.844959	0.931863	1
PRAMEF17	9	3	0	0	0	0.311738	0	0	0	0.0535555	0.244297	0.0982007	1	0.326099	0.691889	0.844959	0.929846	1
TNFRSF11A	0	7	0	1	1	5.25626	9.88616	9.88616	2.8976	0.0535956	0.135041	0.104258	0.246989	0.119979	0.691889	0.844959	0.931863	1
MYOG	1	6	0	0	1	4.17789	0	0	7.94586	0.0536061	0.701458	0.131054	0.109793	0.0754163	0.691889	0.844959	0.931863	1
SOCS4	0	6	0	0	0	5.4738	0	0	0	0.0536239	0.668325	0.114666	1	0.363001	0.691889	0.844959	0.931863	1
ARMC4	1	12	0	0	0	3.53595	0	0	0	0.0536548	0.421144	0.0650323	1	0.242757	0.691889	0.844959	0.87985	1
PXMP4	2	7	1	0	0	3.4929	6.96781	6.96781	0	0.0537599	0.161434	0.0927081	1	0.313196	0.692421	0.844959	0.924428	1
GALNT16	1	9	0	0	0	3.73691	0	0	0	0.0537798	0.472959	0.080843	1	0.284183	0.692421	0.844959	0.909402	1
TTLL4	1	12	1	0	0	3.53349	2.91223	2.91223	0	0.0538022	0.415948	0.154653	1	0.443324	0.692421	0.844959	0.931863	1
IGSF8	7	3	1	0	0	0.295861	1.30498	1.30498	0	0.0538447	0.808315	0.125441	1	0.385846	0.692511	0.848307	0.931863	1
LVRN	1	11	1	1	1	3.58568	6.26749	6.26749	1.80405	0.0539295	0.0825883	0.0883603	0.339363	0.135148	0.693146	0.844959	0.924428	1
HGF	1	0	0	0	2	0	0	0	4.90485	0.0540088	0.358647	0.130002	0.087244	0.062145	0.693195	0.844959	0.931863	1
LAD1	4	1	1	0	0	0.166923	1.91246	1.91246	0	0.0540485	0.581928	0.0952403	1	0.319184	0.693195	0.844959	0.929343	1
SLC7A8	0	6	0	0	0	5.45709	0	0	0	0.0541068	0.656796	0.112905	1	0.359175	0.693195	0.844959	0.931863	1
HDDC3	0	4	0	0	0	6.29119	0	0	0	0.0541079	0.731172	0.131308	1	0.397891	0.693195	0.844959	0.931863	1
VSX2	2	9	0	0	0	3.25293	0	0	0	0.0541105	0.534787	0.104558	1	0.340651	0.693195	0.844959	0.931863	1
GABRR3	1	8	0	0	1	3.83351	0	0	3.82012	0.0542128	0.531674	0.0966831	0.200998	0.0960146	0.694051	0.844959	0.929343	1
CTSH	2	0	0	0	1	0	0	0	5.32089	0.0544966	0.384759	0.127174	0.154329	0.0967762	0.697228	0.844959	0.931863	1
FAAH	6	2	0	2	0	0.249069	2.4246	2.4246	0	0.0546933	0.311082	0.0488912	1	0.196453	0.699124	0.844959	0.840135	1
FDXR	1	9	0	0	1	3.71935	0	0	3.34172	0.0547162	0.534672	0.0972155	0.22247	0.104543	0.699124	0.844959	0.929846	1
FCRLB	0	6	0	0	0	5.43464	0	0	0	0.0547631	0.719752	0.128034	1	0.391203	0.699266	0.844959	0.931863	1
SLC9A2	1	10	0	0	0	3.63482	0	0	0	0.0548848	0.469514	0.0805438	1	0.28343	0.700363	0.844959	0.908649	1
TAF4	5	2	0	0	0	0.238514	0	0	0	0.0550197	0.337424	0.122018	1	0.378694	0.700609	0.844959	0.931863	1
UBFD1	2	0	0	0	0	0	0	0	0	0.0550288	0.513838	0.140862	1	0.416948	0.700609	0.844959	0.931863	1
C2CD5	0	9	0	0	0	4.93702	0	0	0	0.0550691	0.509965	0.0714703	1	0.260043	0.700609	0.844959	0.890686	1
MRPS34	2	0	0	1	0	0	6.57445	6.57445	0	0.0551311	0.17191	0.0376393	1	0.161085	0.700609	0.844959	0.770995	1
SDR42E2	0	6	0	0	0	5.42218	0	0	0	0.0551313	0.660045	0.115574	1	0.364964	0.700609	0.844959	0.931863	1
ATP6V0D2	1	7	0	0	0	3.9521	0	0	0	0.0551457	0.530675	0.099142	1	0.328279	0.700609	0.844959	0.929846	1
SNU13	2	0	0	0	0	0	0	0	0	0.055169	0.531262	0.14253	1	0.420208	0.700609	0.844959	0.931863	1
CDK11B	1	0	0	0	0	0	0	0	0	0.0551906	0.457652	0.141247	1	0.417702	0.700609	0.844959	0.931863	1
CFAP65	5	23	3	0	0	2.25586	3.13543	3.13543	0	0.0552918	0.135508	0.110016	1	0.352835	0.70072	0.844959	0.931863	1
HOXA7	0	5	0	0	0	5.73096	0	0	0	0.0552998	0.785909	0.142033	1	0.419238	0.70072	0.844959	0.931863	1
CHSY3	0	8	2	0	0	5.04695	18.4302	18.4302	0	0.0553296	0.0159551	0.031592	1	0.140738	0.70072	0.844959	0.736124	1
TYMS	2	0	0	0	0	0	0	0	0	0.0553897	0.468523	0.137644	1	0.410604	0.70072	0.844959	0.931863	1
KRT28	0	6	0	0	0	5.41246	0	0	0	0.0554208	0.63861	0.110923	1	0.354834	0.70072	0.844959	0.931863	1
KRTAP10-4	2	9	0	0	1	3.23305	0	0	4.44731	0.0554312	0.529529	0.105678	0.178438	0.0937353	0.70072	0.844959	0.931863	1
CYLC1	2	12	0	0	0	3.04051	0	0	0	0.0554846	0.401149	0.0732755	1	0.264783	0.70072	0.844959	0.894805	1
KLHL32	0	7	0	0	0	5.19688	0	0	0	0.0554859	0.616345	0.104021	1	0.339437	0.70072	0.844959	0.931863	1
CLDN1	0	4	0	0	0	6.2221	0	0	0	0.0556492	0.731966	0.13466	1	0.404653	0.702131	0.844959	0.931863	1
BPIFB6	5	1	0	0	0	0.178008	0	0	0	0.0556951	0.259459	0.108033	1	0.34844	0.702131	0.844959	0.931863	1
TMA16	0	4	0	0	0	6.21935	0	0	0	0.0557116	0.664941	0.121274	1	0.377127	0.702131	0.844959	0.931863	1
MYZAP	1	8	0	0	0	3.80352	0	0	0	0.0557412	0.439516	0.0762238	1	0.27243	0.702131	0.844959	0.900808	1
PPT1	2	0	0	0	0	0	0	0	0	0.0557833	0.42031	0.133557	1	0.402437	0.702209	0.844959	0.931863	1
ZNF41	1	0	0	0	0	0	0	0	0	0.0558225	0.482085	0.144366	1	0.423773	0.702251	0.844959	0.931863	1
ELOF1	1	4	0	0	0	4.84106	0	0	0	0.0560321	0.719848	0.140808	1	0.416842	0.704434	0.844959	0.931863	1
CDC14A	0	7	0	0	0	5.17802	0	0	0	0.0561018	0.582601	0.0959945	1	0.320954	0.704858	0.844959	0.929343	1
AICDA	1	6	0	0	0	4.11748	0	0	0	0.0561876	0.584767	0.11435	1	0.362318	0.705424	0.844959	0.931863	1
PTGR1	2	0	0	0	0	0	0	0	0	0.0562776	0.464986	0.139056	1	0.413397	0.705424	0.844959	0.931863	1
ZNF296	6	2	1	0	0	0.251192	2.42882	2.42882	0	0.0562869	0.45697	0.0878083	1	0.301411	0.705424	0.844959	0.924428	1
B2M	0	3	0	0	0	7.12776	0	0	0	0.0562911	0.749173	0.140753	1	0.416735	0.705424	0.844959	0.931863	1
CCDC130	1	8	1	0	0	3.79155	5.86821	5.86821	0	0.0563643	0.204845	0.12159	1	0.377792	0.705889	0.844959	0.931863	1
C1orf210	0	3	0	0	0	7.12148	0	0	0	0.0564022	0.813988	0.1503	1	0.435137	0.705912	0.850306	0.931863	1
LYRM1	0	3	2	0	0	7.09072	36.9849	36.9849	0	0.0569506	0.00394886	0.00793235	1	0.0462996	0.706526	0.476963	0.416765	1
PIM1	2	8	0	0	0	3.31501	0	0	0	0.0565356	0.534667	0.109515	1	0.351729	0.706526	0.844959	0.931863	1
MAPK8IP1	0	7	0	0	0	5.16298	0	0	0	0.0565988	0.652765	0.115303	1	0.36438	0.706526	0.844959	0.931863	1
RADIL	10	6	0	0	1	0.391406	0	0	1.66154	0.0566295	0.171426	0.0874583	0.35683	0.139408	0.706526	0.844959	0.924428	1
TMEM143	0	6	1	0	1	5.36942	11.7175	11.7175	3.88656	0.0567228	0.112575	0.0953792	0.19834	0.093976	0.706526	0.844959	0.929343	1
IFT74	0	7	0	0	0	5.1586	0	0	0	0.0567444	0.50513	0.0750292	1	0.269346	0.706526	0.844959	0.900437	1
SCAF4	1	13	0	1	1	3.44142	2.34759	2.34759	1.55733	0.0567558	0.508632	0.162214	0.370806	0.229226	0.706526	0.844959	0.931863	1
OR1N1	3	9	0	0	0	2.95817	0	0	0	0.0568289	0.616366	0.129305	1	0.39381	0.706526	0.844959	0.931863	1
RASGRP3	7	3	0	0	0	0.30013	0	0	0	0.0568406	0.134465	0.0799046	1	0.281817	0.706526	0.844959	0.907821	1
HK2	6	3	0	0	0	0.289259	0	0	0	0.0568847	0.193252	0.0983174	1	0.32637	0.706526	0.844959	0.929846	1
RASGRP1	5	2	0	0	0	0.241064	0	0	0	0.0569331	0.188106	0.0983173	1	0.32637	0.706526	0.844959	0.929846	1
RTL3	0	6	0	0	0	5.36179	0	0	0	0.0569572	0.672627	0.121967	1	0.378586	0.706526	0.844959	0.931863	1
ANKRD53	4	1	0	0	0	0.17017	0	0	0	0.0569725	0.389439	0.132466	1	0.400236	0.706526	0.844959	0.931863	1
MAP7D1	9	6	2	1	1	0.383013	2.22368	2.22368	2.1233	0.0569763	0.260571	0.03575	0.30589	0.0603177	0.706526	0.844959	0.760455	1
HNRNPK	4	1	0	0	0	0.170218	0	0	0	0.0570162	0.237974	0.109472	1	0.351634	0.706526	0.844959	0.931863	1
PIGS	4	1	0	0	0	0.170234	0	0	0	0.0570303	0.321263	0.123535	1	0.381875	0.706526	0.844959	0.931863	1
TMEM171	0	5	0	0	0	5.66578	0	0	0	0.0570653	0.737437	0.137298	1	0.409917	0.706526	0.844959	0.931863	1
TMEM9	3	0	0	0	0	0	0	0	0	0.0571973	0.468685	0.138189	1	0.411684	0.7072	0.844959	0.931863	1
E2F5	2	0	0	0	0	0	0	0	0	0.0572188	0.485241	0.142813	1	0.420759	0.7072	0.844959	0.931863	1
SIX3	5	1	0	0	0	0.1797	0	0	0	0.0572315	0.55195	0.147148	1	0.42913	0.7072	0.844959	0.931863	1
BMI1	0	5	0	0	0	5.65858	0	0	0	0.0572643	0.636755	0.115456	1	0.364711	0.7072	0.844959	0.931863	1
TENT4A	0	7	0	1	2	5.14069	11.0574	11.0574	4.509	0.0573443	0.119811	0.101656	0.0975663	0.0556749	0.707332	0.844959	0.931863	1
CARD19	0	4	0	0	0	6.14652	0	0	0	0.0573978	0.709365	0.133896	1	0.403119	0.707332	0.844959	0.931863	1
DPY19L3	0	7	0	0	1	5.13889	0	0	2.49347	0.0574049	0.555917	0.0905244	0.27456	0.116684	0.707332	0.844959	0.924428	1
PRICKLE1	0	8	1	0	0	4.98477	6.71238	6.71238	0	0.0575188	0.202599	0.137765	1	0.410844	0.707332	0.844959	0.931863	1
DDX4	0	8	0	0	1	4.98406	0	0	2.46596	0.0575445	0.505499	0.074582	0.276664	0.100711	0.707332	0.844959	0.898442	1
ABR	3	14	0	1	1	2.68689	1.8578	1.8578	2.05025	0.0575504	0.602822	0.164588	0.312947	0.20428	0.707332	0.844959	0.931863	1
IGFALS	1	9	0	0	0	3.66814	0	0	0	0.0575507	0.674765	0.132587	1	0.40048	0.707332	0.844959	0.931863	1
OGDH	1	11	0	0	1	3.52514	0	0	1.72071	0.0575643	0.450542	0.0783006	0.349361	0.125802	0.707332	0.844959	0.903072	1
JAM3	0	5	0	0	0	5.64565	0	0	0	0.057624	0.65845	0.121357	1	0.377301	0.707406	0.844959	0.931863	1
LDHAL6A	0	5	0	0	0	5.64435	0	0	0	0.0576603	0.680603	0.126562	1	0.388169	0.707406	0.844959	0.931863	1
PXDNL	11	9	0	0	0	0.435862	0	0	0	0.0577102	0.0552865	0.0477566	1	0.193015	0.707406	0.844959	0.837082	1
PLXNB3	14	12	0	0	1	0.480979	0	0	0.924893	0.057715	0.0656616	0.0504058	0.487472	0.115637	0.707406	0.844959	0.843489	1
JUNB	5	1	0	0	1	0.180281	0	0	5.13741	0.0577638	0.587543	0.151014	0.158835	0.113461	0.707561	0.844959	0.931863	1
ELL2	0	7	0	0	0	5.12285	0	0	0	0.0579488	0.59032	0.101069	1	0.332715	0.709109	0.844959	0.931863	1
HMGCL	2	0	0	1	0	0	3.52627	3.52627	0	0.0579648	0.330887	0.0674305	1	0.249267	0.709109	0.844959	0.883577	1
ZNF578	2	12	1	0	0	3.00882	2.68811	2.68811	0	0.0579989	0.433205	0.161948	1	0.456772	0.709109	0.844959	0.931863	1
KTN1	2	16	0	0	0	2.87243	0	0	0	0.0581373	0.189556	0.0209645	1	0.101991	0.710358	0.844959	0.633561	1
TBC1D2B	0	8	0	0	0	4.96617	0	0	0	0.0581924	0.61455	0.106968	1	0.346065	0.710541	0.844959	0.931863	1
C19orf57	0	7	2	0	0	5.11477	17.6979	17.6979	0	0.058225	0.0172702	0.0338918	1	0.148602	0.710541	0.844959	0.74975	1
PTX4	2	10	3	0	2	3.11398	15.2047	15.2047	7.46479	0.0584514	0.002977	0.00716373	0.0478051	0.00307509	0.711543	0.418965	0.390353	0.316605
BRD8	8	6	0	0	0	0.374764	0	0	0	0.0584763	0.056295	0.052002	1	0.205744	0.711543	0.844959	0.84871	1
ZNF430	4	1	0	0	0	0.171863	0	0	0	0.0585246	0.280503	0.119496	1	0.373361	0.711543	0.844959	0.931863	1
KIF9	1	10	0	0	0	3.57167	0	0	0	0.0585959	0.446644	0.0794631	1	0.2807	0.711543	0.844959	0.906918	1
ZNF451	4	2	2	0	0	0.228843	1.91253	1.91253	0	0.0586004	0.460782	0.0593135	1	0.226869	0.711543	0.844959	0.869138	1
TMEM163	2	0	0	1	0	0	5.58842	5.58842	0	0.0586058	0.204683	0.0463723	1	0.188784	0.711543	0.844959	0.832998	1
CRKL	0	5	0	0	0	5.60857	0	0	0	0.05867	0.74577	0.142223	1	0.419609	0.711543	0.844959	0.931863	1
ECI1	1	7	0	0	0	3.87989	0	0	0	0.0586916	0.585358	0.117668	1	0.369464	0.711543	0.844959	0.931863	1
GRK4	4	1	0	0	2	0.172131	0	0	6.17554	0.0587717	0.223151	0.10897	0.0632659	0.0412065	0.711543	0.844959	0.931863	1
MARVELD2	1	9	0	0	1	3.64617	0	0	3.19824	0.0588151	0.499993	0.0949229	0.229838	0.105268	0.711543	0.844959	0.929343	1
TMEM105	0	3	0	0	0	6.99697	0	0	0	0.0586654	0.793833	0.152655	1	0.439581	0.711543	0.845292	0.931863	1
SMR3A	0	3	0	0	0	6.99424	0	0	0	0.0587163	0.820921	0.156337	1	0.446458	0.711543	0.853649	0.931863	1
HIST2H3D	0	4	0	0	1	6.09221	0	0	13.0498	0.0586965	0.856385	0.15966	0.0703491	0.061652	0.711543	0.87417	0.931863	1
DDX17	6	3	1	0	2	0.291964	0.98259	0.98259	4.88475	0.0588163	0.986852	0.150446	0.0877277	0.0703161	0.711543	0.98852	0.931863	1
SLC2A13	0	7	1	0	0	5.09172	9.05507	9.05507	0	0.0590211	0.148232	0.118029	1	0.370236	0.71226	0.844959	0.931863	1
ZSCAN5A	1	8	0	0	0	3.74203	0	0	0	0.0590258	0.568989	0.113414	1	0.360284	0.71226	0.844959	0.931863	1
ADAMTS12	8	32	3	2	0	1.95485	3.15531	3.15531	0	0.0590583	0.0554482	0.0724827	1	0.262707	0.71226	0.844959	0.893293	1
PGLS	2	0	0	0	0	0	0	0	0	0.0590847	0.601817	0.155872	1	0.445594	0.71226	0.844959	0.931863	1
ZNF574	4	2	0	0	0	0.229491	0	0	0	0.0590973	0.341838	0.13267	1	0.400649	0.71226	0.844959	0.931863	1
ZDHHC8	5	2	0	0	2	0.243924	0	0	4.59003	0.0591189	0.333854	0.128578	0.0953084	0.0661975	0.71226	0.844959	0.931863	1
GOLGA6L1	1	0	0	0	0	0	0	0	0	0.0591749	0.390149	0.142845	1	0.420821	0.71226	0.844959	0.931863	1
CST3	3	0	0	0	0	0	0	0	0	0.0591979	0.583661	0.15294	1	0.440116	0.71226	0.844959	0.931863	1
FRS3	4	1	0	0	0	0.172597	0	0	0	0.0592033	0.372606	0.134408	1	0.404148	0.71226	0.844959	0.931863	1
DUXB	2	0	0	0	0	0	0	0	0	0.059278	0.433195	0.141522	1	0.41824	0.712371	0.844959	0.931863	1
TEX45	6	2	0	0	0	0.255141	0	0	0	0.059314	0.334321	0.126572	1	0.388189	0.712371	0.844959	0.931863	1
ROM1	0	5	0	0	1	5.58495	0	0	5.07903	0.0593482	0.728284	0.140167	0.160324	0.107765	0.712371	0.844959	0.931863	1
ZNF346	0	5	0	0	0	5.5846	0	0	0	0.0593582	0.681028	0.129909	1	0.395043	0.712371	0.844959	0.931863	1
IFIT1B	0	6	0	0	0	5.2836	0	0	0	0.0594259	0.66309	0.124271	1	0.383412	0.712747	0.844959	0.931863	1
NDUFB1	0	3	0	0	0	6.95296	0	0	0	0.0594938	0.785735	0.153299	1	0.44079	0.713124	0.844959	0.931863	1
HTRA4	0	6	0	0	0	5.27959	0	0	0	0.0595556	0.67155	0.126593	1	0.388232	0.713255	0.844959	0.931863	1
PEF1	2	0	0	0	0	0	0	0	0	0.0596314	0.512352	0.150077	1	0.434715	0.713255	0.844959	0.931863	1
PCDHB6	11	27	1	0	1	1.87854	1.46294	1.46294	2.24883	0.0596355	0.72878	0.169688	0.294487	0.1997	0.713255	0.844959	0.931863	1
TRAPPC9	11	8	0	0	1	0.429059	0	0	1.4337	0.0596767	0.0771946	0.0587646	0.388906	0.10921	0.713255	0.844959	0.868242	1
CUL1	1	0	0	0	0	0	0	0	0	0.0596871	0.371249	0.141727	1	0.418641	0.713255	0.844959	0.931863	1
MRPS18B	2	0	0	0	0	0	0	0	0	0.059843	0.469384	0.146427	1	0.427747	0.71357	0.844959	0.931863	1
RAB40B	2	0	1	0	2	0	6.23781	6.23781	12.8159	0.0598465	0.181933	0.0430577	0.0201109	0.00697219	0.71357	0.844959	0.816852	0.500058
CST8	0	3	1	0	0	6.93293	22.6621	22.6621	0	0.0598759	0.0548077	0.0530488	1	0.208829	0.71357	0.844959	0.84871	1
C9orf85	3	0	0	0	0	0	0	0	0	0.0598958	0.487215	0.145386	1	0.425744	0.71357	0.844959	0.931863	1
HIST1H3A	0	4	0	0	1	6.04726	0	0	13.0498	0.0597987	0.851637	0.161639	0.0703491	0.0622762	0.71357	0.870687	0.931863	1
KLRC1	0	4	0	0	0	6.04027	0	0	0	0.0599723	0.666328	0.129636	1	0.394485	0.713669	0.844959	0.931863	1
TMCO6	0	6	1	0	0	5.26665	7.6133	7.6133	0	0.0599771	0.177838	0.130253	1	0.395744	0.713669	0.844959	0.931863	1
SPACA4	1	4	0	0	0	4.71647	0	0	0	0.060149	0.77031	0.156424	1	0.44662	0.71528	0.844959	0.931863	1
SLC6A15	2	12	0	4	0	2.97872	9.89704	9.89704	0	0.0604973	0.00394991	0.011199	1	0.0615043	0.715939	0.476963	0.494847	1
TM7SF3	0	6	0	0	0	5.25825	0	0	0	0.0602526	0.606806	0.110965	1	0.354927	0.715939	0.844959	0.931863	1
ZMIZ2	1	10	0	0	0	3.54256	0	0	0	0.0603966	0.499438	0.0961501	1	0.321319	0.715939	0.844959	0.929343	1
IZUMO3	0	4	0	0	0	6.02219	0	0	0	0.0604244	0.663714	0.129878	1	0.394981	0.715939	0.844959	0.931863	1
PKD2L2	1	9	1	0	2	3.61892	2.61764	2.61764	5.72102	0.0604257	0.460046	0.171094	0.0705554	0.0653905	0.715939	0.844959	0.931863	1
NDUFS8	1	6	0	0	0	4.02447	0	0	0	0.0604461	0.598413	0.124929	1	0.384783	0.715939	0.844959	0.931863	1
KIF4B	2	15	0	0	1	2.8735	0	0	1.44763	0.0604468	0.365992	0.0679434	0.386777	0.121908	0.715939	0.844959	0.883577	1
OR56A4	2	0	0	0	0	0	0	0	0	0.06047	0.663241	0.16264	1	0.458029	0.715939	0.844959	0.931863	1
MELK	0	7	0	0	1	5.04666	0	0	2.74205	0.0606133	0.565187	0.0979986	0.256914	0.117875	0.716228	0.844959	0.929846	1
ACRV1	1	6	0	0	0	4.02078	0	0	0	0.0606226	0.55752	0.115908	1	0.365684	0.716228	0.844959	0.931863	1
RBMXL2	6	2	0	0	0	0.256833	0	0	0	0.0606361	0.424803	0.1413	1	0.417805	0.716228	0.844959	0.931863	1
TMEM132A	1	11	0	0	0	3.47658	0	0	0	0.0606682	0.539	0.106219	1	0.34439	0.716228	0.844959	0.931863	1
COL6A5	3	22	1	1	2	2.49703	2.15879	2.15879	1.36893	0.0607369	0.397355	0.17162	0.334928	0.221662	0.716324	0.844959	0.931863	1
GPR21	0	5	0	0	0	5.53714	0	0	0	0.0607495	0.749384	0.14723	1	0.429288	0.716324	0.844959	0.931863	1
LY6G6C	0	3	0	0	0	6.88517	0	0	0	0.0608001	0.784464	0.155937	1	0.445715	0.716489	0.844959	0.931863	1
CAVIN4	1	7	0	0	0	3.8373	0	0	0	0.0609022	0.617028	0.128663	1	0.392495	0.71726	0.844959	0.931863	1
IGSF22	2	14	1	3	0	2.86688	9.65992	9.65992	0	0.0638363	0.00429928	0.0126129	1	0.0677694	0.718454	0.50061	0.505197	1
PRDM9	16	43	0	0	6	1.67901	0	0	11.9854	0.0610669	0.0256715	0.00446748	0.00236879	0.000131819	0.718454	0.844959	0.299291	0.028978
CHD1L	0	8	2	0	0	4.88419	8.92058	8.92058	0	0.0612667	0.0623514	0.0914019	1	0.31008	0.718454	0.844959	0.924428	1
KIAA0100	10	10	0	0	2	0.43974	0	0	1.59912	0.0612832	0.0345171	0.0391418	0.29607	0.063248	0.718454	0.844959	0.782355	1
NUP35	0	5	0	0	0	5.51917	0	0	0	0.0612861	0.634058	0.121914	1	0.378475	0.718454	0.844959	0.931863	1
PSMD7	2	0	0	0	0	0	0	0	0	0.0613096	0.476841	0.150015	1	0.434597	0.718454	0.844959	0.931863	1
SVIL	14	14	0	1	2	0.497445	0.356396	0.356396	1.61428	0.0613123	0.243596	0.13664	0.293759	0.169203	0.718454	0.844959	0.931863	1
RAP1B	3	0	0	0	0	0	0	0	0	0.0613164	0.434943	0.14199	1	0.419153	0.718454	0.844959	0.931863	1
ATIC	1	9	0	0	0	3.60281	0	0	0	0.0614003	0.468419	0.0901424	1	0.307058	0.718454	0.844959	0.924428	1
SLC35B3	1	7	0	0	0	3.82428	0	0	0	0.0615964	0.527463	0.108628	1	0.349763	0.718454	0.844959	0.931863	1
TMEM101	2	0	0	0	0	0	0	0	0	0.0616188	0.586351	0.160145	1	0.453478	0.718454	0.844959	0.931863	1
OXGR1	2	0	0	0	0	0	0	0	0	0.0616288	0.589228	0.160376	1	0.453902	0.718454	0.844959	0.931863	1
SGF29	0	5	0	0	0	5.50537	0	0	0	0.0617021	0.69169	0.136867	1	0.409061	0.718454	0.844959	0.931863	1
POF1B	2	11	2	0	1	3.01308	3.54292	3.54292	2.99969	0.0617056	0.193934	0.14095	0.240883	0.148807	0.718454	0.844959	0.931863	1
OR56A1	9	2	0	0	0	0.279493	0	0	0	0.0617466	0.433997	0.14074	1	0.416709	0.718454	0.844959	0.931863	1
ZNF821	4	1	0	0	0	0.175343	0	0	0	0.0617719	0.299739	0.127898	1	0.390923	0.718454	0.844959	0.931863	1
NT5C3A	0	5	0	0	0	5.50263	0	0	0	0.0617853	0.658013	0.128917	1	0.393015	0.718454	0.844959	0.931863	1
CFAP298	2	0	0	0	0	0	0	0	0	0.0618053	0.430983	0.145965	1	0.426859	0.718454	0.844959	0.931863	1
RSL1D1	1	8	0	0	1	3.69111	0	0	3.64118	0.0619068	0.512946	0.104045	0.208524	0.104805	0.718454	0.844959	0.931863	1
KRT78	2	10	0	0	0	3.06925	0	0	0	0.0619239	0.454095	0.0969482	1	0.323184	0.718454	0.844959	0.929846	1
CASKIN1	7	4	0	0	0	0.333698	0	0	0	0.0619437	0.249104	0.116237	1	0.366393	0.718454	0.844959	0.931863	1
KDR	1	12	1	2	1	3.40677	6.97554	6.97554	1.31748	0.0619815	0.0338857	0.0625805	0.407646	0.119101	0.718454	0.844959	0.872559	1
AREL1	6	3	0	0	0	0.296346	0	0	0	0.0620224	0.137343	0.0890856	1	0.304509	0.718454	0.844959	0.924428	1
HSPA12B	2	12	0	0	0	2.96079	0	0	0	0.0620386	0.484253	0.103385	1	0.337995	0.718454	0.844959	0.931863	1
N6AMT1	0	4	0	0	0	5.95694	0	0	0	0.0620915	0.720261	0.145528	1	0.426018	0.718454	0.844959	0.931863	1
LIMK2	0	7	0	0	1	5.00481	0	0	2.60236	0.0621356	0.623672	0.117336	0.266539	0.139639	0.718454	0.844959	0.931863	1
PLA2G3	4	1	0	0	0	0.17584	0	0	0	0.0622424	0.277489	0.124705	1	0.384316	0.718454	0.844959	0.931863	1
XKR9	0	5	0	0	0	5.48743	0	0	0	0.062248	0.699825	0.139791	1	0.414844	0.718454	0.844959	0.931863	1
BNIP3	2	0	0	0	0	0	0	0	0	0.0622683	0.556286	0.159161	1	0.451674	0.718454	0.844959	0.931863	1
ABCB8	2	12	0	0	0	2.95815	0	0	0	0.0622688	0.42173	0.0872064	1	0.299944	0.718454	0.844959	0.924428	1
GAP43	2	0	0	0	0	0	0	0	0	0.0623124	0.560099	0.159561	1	0.452407	0.718454	0.844959	0.931863	1
IHH	0	6	0	0	0	5.1951	0	0	0	0.0623701	0.741352	0.147987	1	0.430735	0.718454	0.844959	0.931863	1
GDF5	6	2	0	0	1	0.259063	0	0	3.56139	0.0624016	0.347757	0.133831	0.212065	0.129475	0.718454	0.844959	0.931863	1
CD209	1	7	0	0	0	3.80895	0	0	0	0.0624255	0.515113	0.106736	1	0.345547	0.718454	0.844959	0.931863	1
FAM32A	0	3	0	0	0	6.80201	0	0	0	0.0624543	0.775216	0.158054	1	0.449636	0.718454	0.844959	0.931863	1
RDH8	0	5	0	0	0	5.47686	0	0	0	0.0625725	0.708336	0.142346	1	0.41985	0.718454	0.844959	0.931863	1
GRK6	2	11	1	0	1	3.00212	2.80441	2.80441	3.0302	0.0626267	0.415714	0.17019	0.239117	0.170987	0.718454	0.844959	0.931863	1
ALAS1	1	0	0	0	0	0	0	0	0	0.0626662	0.499284	0.159529	1	0.452349	0.718454	0.844959	0.931863	1
DNAJC2	1	0	0	0	0	0	0	0	0	0.0626833	0.379153	0.148025	1	0.430808	0.718454	0.844959	0.931863	1
OR6C68	1	6	0	0	0	3.97814	0	0	0	0.0627041	0.684246	0.146676	1	0.428224	0.718454	0.844959	0.931863	1
HIVEP3	10	9	0	0	1	0.434066	0	0	0.742758	0.0628096	0.115614	0.0787862	0.53676	0.17606	0.718454	0.844959	0.905231	1
AC008397.2	0	7	0	0	0	4.98625	0	0	0	0.0628245	0.634177	0.121456	1	0.377509	0.718454	0.844959	0.931863	1
PDE4C	0	7	0	0	0	4.98625	0	0	0	0.0628245	0.634177	0.121456	1	0.377509	0.718454	0.844959	0.931863	1
AGAP4	1	0	0	0	0	0	0	0	0	0.062917	0.515339	0.16127	1	0.455536	0.718454	0.844959	0.931863	1
PCDHGC4	3	1	1	0	1	0.163642	2.63589	2.63589	1.90396	0.0629285	0.432979	0.0801852	0.328117	0.122021	0.718454	0.844959	0.907845	1
PPP1R9B	5	2	2	0	0	0.248858	3.97497	3.97497	0	0.0629898	0.137132	0.0240612	1	0.113741	0.718454	0.844959	0.662004	1
IRX1	1	8	0	0	0	3.67116	0	0	0	0.0630775	0.687726	0.14661	1	0.428099	0.718454	0.844959	0.931863	1
KLHL24	1	0	0	0	0	0	0	0	0	0.0631579	0.498344	0.160439	1	0.454016	0.718454	0.844959	0.931863	1
EMC9	0	4	0	0	0	5.91446	0	0	0	0.0632075	0.721919	0.148106	1	0.430963	0.718454	0.844959	0.931863	1
ZNFX1	2	17	0	0	0	2.79627	0	0	0	0.0632435	0.316422	0.0558859	1	0.217086	0.718454	0.844959	0.86079	1
PRLHR	2	9	1	0	0	3.12505	11.1289	11.1289	0	0.0632442	0.0966254	0.0754284	1	0.270379	0.718454	0.844959	0.900437	1
ODF3	2	0	0	0	0	0	0	0	0	0.0632784	0.553162	0.160965	1	0.454978	0.718454	0.844959	0.931863	1
PCDHGA11	1	10	0	0	2	3.4974	0	0	3.82012	0.0633088	0.579304	0.121545	0.120507	0.0765091	0.718454	0.844959	0.931863	1
NBN	1	10	0	0	0	3.4973	0	0	0	0.0633152	0.407227	0.0740717	1	0.26686	0.718454	0.844959	0.896784	1
GRINA	0	5	0	0	1	5.45226	0	0	4.80596	0.0633349	0.684622	0.138323	0.167681	0.110493	0.718454	0.844959	0.931863	1
ATXN7	2	13	0	0	0	2.906	0	0	0	0.0633446	0.420116	0.0874611	1	0.300565	0.718454	0.844959	0.924428	1
RPS24	2	0	0	0	0	0	0	0	0	0.0633896	0.514571	0.157763	1	0.449099	0.718454	0.844959	0.931863	1
CHGA	1	8	0	0	1	3.66512	0	0	3.90353	0.0634367	0.495909	0.101748	0.197673	0.0986814	0.718454	0.844959	0.931863	1
HECTD1	0	12	0	0	0	4.51499	0	0	0	0.0634618	0.448774	0.0596211	1	0.227737	0.718454	0.844959	0.869264	1
SNX3	3	0	0	0	0	0	0	0	0	0.0634862	0.527491	0.156593	1	0.446932	0.718454	0.844959	0.931863	1
ACP7	0	6	0	1	0	5.15898	8.16524	8.16524	0	0.06362	0.165293	0.130659	1	0.396571	0.718454	0.844959	0.931863	1
RFX5	0	7	0	1	0	4.964	7.38129	7.38129	0	0.0636614	0.183656	0.140129	1	0.415509	0.718454	0.844959	0.931863	1
ZBTB12	1	8	0	0	0	3.66125	0	0	0	0.0636684	0.697256	0.149609	1	0.433826	0.718454	0.844959	0.931863	1
MTTP	2	13	0	1	1	2.90223	2.02832	2.02832	1.93907	0.0636919	0.564512	0.179011	0.324342	0.223317	0.718454	0.844959	0.931863	1
ZMAT1	1	0	0	0	0	0	0	0	0	0.0636923	0.447852	0.157097	1	0.447866	0.718454	0.844959	0.931863	1
PPARG	0	6	1	0	0	5.15674	10.4772	10.4772	0	0.0636982	0.12693	0.111787	1	0.35673	0.718454	0.844959	0.931863	1
DNM1	1	10	0	0	0	3.49124	0	0	0	0.0637172	0.46834	0.0922074	1	0.312004	0.718454	0.844959	0.924428	1
OSBPL10	0	7	0	0	0	4.96169	0	0	0	0.0637491	0.610499	0.116274	1	0.366474	0.718454	0.844959	0.931863	1
SPATA13	4	20	0	0	0	2.34624	0	0	0	0.0637601	0.291161	0.0620116	1	0.234431	0.718454	0.844959	0.872559	1
ME1	1	9	1	0	0	3.56458	3.41173	3.41173	0	0.0637823	0.356732	0.170438	1	0.472008	0.718454	0.844959	0.931863	1
DLGAP3	0	8	1	0	2	4.82042	10.466	10.466	3.64861	0.0637832	0.127075	0.115011	0.127488	0.0765742	0.718454	0.844959	0.931863	1
ZNF735	2	9	0	0	1	3.11807	0	0	4.32886	0.0637882	0.449169	0.0992538	0.182301	0.0906905	0.718454	0.844959	0.929846	1
RREB1	5	22	0	0	0	2.2112	0	0	0	0.0638086	0.322091	0.0744412	1	0.26782	0.718454	0.844959	0.897942	1
INSL6	0	4	0	0	0	5.8912	0	0	0	0.0638291	0.742134	0.153433	1	0.441041	0.718454	0.844959	0.931863	1
FGF9	1	5	0	0	0	4.20785	0	0	0	0.0638499	0.632194	0.139842	1	0.414944	0.718454	0.844959	0.931863	1
PGC	0	5	0	0	0	5.43526	0	0	0	0.0638683	0.679034	0.137978	1	0.411265	0.718454	0.844959	0.931863	1
RETN	0	3	0	0	0	6.85314	0	0	0	0.0614304	0.799565	0.159503	1	0.452301	0.718454	0.845602	0.931863	1
PIK3CA	2	15	1	0	0	2.8601	1.30815	1.30815	0	0.0616979	0.819607	0.151501	1	0.437409	0.718454	0.852861	0.931863	1
EFHD2	2	0	0	0	0	0	0	0	0	0.0640107	0.616713	0.167342	1	0.466501	0.718878	0.844959	0.931863	1
SIGLEC12	0	6	0	0	0	5.14726	0	0	0	0.0640316	0.647545	0.128598	1	0.392361	0.718878	0.844959	0.931863	1
DOP1B	7	28	0	4	2	2.00867	2.99948	2.99948	1.5553	0.0640468	0.0964701	0.102656	0.30291	0.139019	0.718878	0.844959	0.931863	1
PCSK2	2	11	0	0	0	2.98539	0	0	0	0.0640609	0.421997	0.0903726	1	0.307612	0.718878	0.844959	0.924428	1
STKLD1	4	1	0	0	0	0.177782	0	0	0	0.0640941	0.277032	0.12743	1	0.38996	0.718878	0.844959	0.931863	1
ANTXR2	0	6	1	0	2	5.14421	5.8844	5.8844	7.29722	0.0641393	0.231718	0.155454	0.0494715	0.0451263	0.718878	0.844959	0.931863	1
PSMF1	2	0	0	0	0	0	0	0	0	0.0641632	0.507816	0.15864	1	0.450715	0.718878	0.844959	0.931863	1
CYB5A	0	3	0	0	0	6.71637	0	0	0	0.0642199	0.743965	0.156424	1	0.446619	0.719101	0.844959	0.931863	1
OR10J1	1	6	0	0	0	3.9465	0	0	0	0.0643017	0.718581	0.156023	1	0.445875	0.719605	0.844959	0.931863	1
COLCA2	2	0	0	0	0	0	0	0	0	0.064354	0.482623	0.156469	1	0.446702	0.719623	0.844959	0.931863	1
OR5I1	1	6	0	0	0	3.94445	0	0	0	0.0644066	0.693143	0.151719	1	0.437819	0.719623	0.844959	0.931863	1
KRBA1	2	13	0	3	0	2.89428	8.15683	8.15683	0	0.0644316	0.0169598	0.0337073	1	0.147976	0.719623	0.844959	0.747692	1
AC004076.1	0	3	0	0	0	6.70542	0	0	0	0.0644504	0.727829	0.153873	1	0.441866	0.719623	0.844959	0.931863	1
KCNJ9	3	11	2	1	0	2.72354	16.4207	16.4207	0	0.0662067	0.00193405	0.00475005	1	0.0301609	0.719678	0.310113	0.309928	1
G6PC3	0	5	1	1	0	5.37904	23.5047	23.5047	0	0.0656705	0.00986618	0.0215025	1	0.104063	0.719678	0.753915	0.636358	1
ADAMTS20	11	12	0	0	0	0.467874	0	0	0	0.0652825	0.0111476	0.0193191	1	0.095565	0.719678	0.779468	0.612364	1
SLC6A12	6	2	0	0	0	0.261665	0	0	0	0.0644948	0.208621	0.109611	1	0.351941	0.719678	0.844959	0.931863	1
GUCY1A1	1	9	0	0	0	3.5511	0	0	0	0.0646453	0.475595	0.0965848	1	0.322336	0.719678	0.844959	0.929343	1
ZBTB48	1	0	0	0	1	0	0	0	2.5948	0.0646696	0.516278	0.164877	0.26708	0.181547	0.719678	0.844959	0.931863	1
CCL28	0	3	0	0	0	6.6945	0	0	0	0.0646813	0.788999	0.164959	1	0.462224	0.719678	0.844959	0.931863	1
CHEK1	0	6	0	0	0	5.1267	0	0	0	0.0647611	0.589656	0.113396	1	0.360244	0.719678	0.844959	0.931863	1
FADS1	4	1	0	0	0	0.178551	0	0	0	0.0648338	0.313511	0.135122	1	0.405578	0.719678	0.844959	0.931863	1
OPRM1	1	8	0	0	0	3.64054	0	0	0	0.0649222	0.547421	0.117821	1	0.369791	0.719678	0.844959	0.931863	1
IL18R1	0	6	0	0	0	5.1205	0	0	0	0.0649832	0.612854	0.120551	1	0.375598	0.719678	0.844959	0.931863	1
OTUD6A	0	5	0	0	0	5.40009	0	0	0	0.0649887	0.785375	0.162777	1	0.458278	0.719678	0.844959	0.931863	1
UNC5D	2	13	0	0	0	2.8872	0	0	0	0.0650984	0.360393	0.0725745	1	0.262948	0.719678	0.844959	0.893293	1
ANGPTL1	1	8	0	0	0	3.63748	0	0	0	0.0651096	0.538795	0.115849	1	0.365557	0.719678	0.844959	0.931863	1
BAHD1	0	8	0	0	1	4.78722	0	0	2.28914	0.0651385	0.641602	0.12647	0.291005	0.158335	0.719678	0.844959	0.931863	1
BIRC2	1	0	0	0	0	0	0	0	0	0.0651854	0.472389	0.162234	1	0.457291	0.719678	0.844959	0.931863	1
BTN2A1	0	6	2	0	3	5.11387	18.9243	18.9243	10.1581	0.0652212	0.0151492	0.0315923	0.0144559	0.00396937	0.719678	0.844959	0.736124	0.368004
ZNF280B	4	1	0	0	0	0.178999	0	0	0	0.0652664	0.376038	0.14556	1	0.426079	0.719678	0.844959	0.931863	1
CFHR2	0	5	0	0	0	5.39115	0	0	0	0.0652773	0.64472	0.131781	1	0.398851	0.719678	0.844959	0.931863	1
AP001267.5	0	8	0	0	0	4.78013	0	0	0	0.065432	0.586319	0.110399	1	0.353679	0.719678	0.844959	0.931863	1
FAM129C	0	7	0	0	0	4.91767	0	0	0	0.0654458	0.604746	0.117359	1	0.368803	0.719678	0.844959	0.931863	1
SLC6A8	4	1	0	0	0	0.179208	0	0	0	0.0654691	0.339201	0.140377	1	0.415997	0.719678	0.844959	0.931863	1
AFAP1L2	0	7	0	0	1	4.91511	0	0	2.18293	0.0655458	0.599371	0.115905	0.300364	0.151709	0.719678	0.844959	0.931863	1
SEC14L5	8	4	0	0	0	0.348897	0	0	0	0.0655793	0.149944	0.0928913	1	0.313631	0.719678	0.844959	0.924428	1
GCOM1	1	10	0	0	0	3.46332	0	0	0	0.0656058	0.408443	0.0770051	1	0.274437	0.719678	0.844959	0.901172	1
TNFRSF25	1	8	0	0	0	3.62939	0	0	0	0.0656086	0.554712	0.120839	1	0.376207	0.719678	0.844959	0.931863	1
KCNH4	7	4	0	0	1	0.338733	0	0	1.75621	0.0656411	0.204198	0.110942	0.345031	0.163176	0.719678	0.844959	0.931863	1
ZFP90	1	0	1	0	1	0	3.43267	3.43267	2.80662	0.0656723	0.354588	0.0662397	0.252698	0.0852003	0.719678	0.844959	0.881511	1
ATP6V1G1	0	3	0	0	0	6.64788	0	0	0	0.0656795	0.767184	0.163538	1	0.459659	0.719678	0.844959	0.931863	1
GPR55	1	6	0	0	0	3.91563	0	0	0	0.0659057	0.701491	0.156255	1	0.446306	0.719678	0.844959	0.931863	1
MBP	0	5	0	0	0	5.37182	0	0	0	0.0659063	0.683774	0.142974	1	0.421071	0.719678	0.844959	0.931863	1
GDAP2	0	6	0	0	1	5.09488	0	0	3.59	0.0659095	0.575336	0.110878	0.210782	0.111159	0.719678	0.844959	0.931863	1
HDAC1	0	6	2	0	0	5.09276	14.2733	14.2733	0	0.0659868	0.0261518	0.0490313	1	0.196875	0.719678	0.844959	0.840135	1
SLC2A11	0	6	0	0	0	5.09214	0	0	0	0.0660094	0.668253	0.137694	1	0.410704	0.719678	0.844959	0.931863	1
CT47B1	0	5	0	0	0	5.36774	0	0	0	0.06604	0.759283	0.160085	1	0.453369	0.719678	0.844959	0.931863	1
SEC13	0	5	0	0	0	5.36683	0	0	0	0.0660701	0.637299	0.131177	1	0.397625	0.719678	0.844959	0.931863	1
WISP2	2	0	0	0	0	0	0	0	0	0.0660943	0.567739	0.167907	1	0.467511	0.719678	0.844959	0.931863	1
CCDC116	1	0	1	0	1	0	6.79968	6.79968	2.91176	0.0660954	0.175183	0.0368928	0.246124	0.0517722	0.719678	0.844959	0.76451	1
SLC39A13	0	5	0	0	0	5.36602	0	0	0	0.0660966	0.697226	0.146606	1	0.428091	0.719678	0.844959	0.931863	1
TAOK2	6	4	2	0	0	0.326829	2.05286	2.05286	0	0.0661275	0.402707	0.0664686	1	0.246667	0.719678	0.844959	0.881511	1
CYP4X1	0	6	1	0	0	5.08803	7.74449	7.74449	0	0.0661598	0.174698	0.138539	1	0.412375	0.719678	0.844959	0.931863	1
ALDH16A1	2	12	0	0	0	2.91491	0	0	0	0.0661729	0.411066	0.0891775	1	0.304731	0.719678	0.844959	0.924428	1
LSG1	0	7	0	1	0	4.89887	5.5703	5.5703	0	0.0661857	0.244892	0.164466	1	0.461336	0.719678	0.844959	0.931863	1
SEC14L4	1	7	1	0	0	3.74199	4.06455	4.06455	0	0.0661951	0.299532	0.162965	1	0.458619	0.719678	0.844959	0.931863	1
YIPF3	0	5	0	0	1	5.36301	0	0	5.00789	0.0661956	0.662907	0.138222	0.162178	0.107553	0.719678	0.844959	0.931863	1
TRIM48	1	5	0	1	0	4.15554	5.87942	5.87942	0	0.0662382	0.204432	0.131082	1	0.397433	0.719678	0.844959	0.931863	1
MOG	1	6	0	0	4	3.90923	0	0	24.1597	0.0662434	0.563085	0.126682	0.000631849	0.000835095	0.719678	0.844959	0.931863	0.121911
SNRNP25	0	3	0	0	0	6.62128	0	0	0	0.066258	0.704594	0.152789	1	0.439834	0.719678	0.844959	0.931863	1
CMIP	7	3	0	1	0	0.311449	0.96052	0.96052	0	0.0652252	0.969527	0.169575	1	0.470479	0.719678	0.972873	0.931863	1
KBTBD3	2	11	0	0	0	2.95907	0	0	0	0.066388	0.419188	0.0925757	1	0.312881	0.720663	0.844959	0.924428	1
IL19	2	6	0	0	0	3.45372	0	0	0	0.0664224	0.525538	0.126392	1	0.387818	0.720663	0.844959	0.931863	1
KLF6	2	0	0	0	0	0	0	0	0	0.0664909	0.537828	0.166071	1	0.464225	0.721006	0.844959	0.931863	1
TMEM215	0	4	0	0	0	5.78907	0	0	0	0.0666485	0.789635	0.167957	1	0.4676	0.722315	0.844959	0.931863	1
AC245748.1	0	3	0	0	0	6.59922	0	0	0	0.0667428	0.716416	0.156196	1	0.446196	0.722936	0.844959	0.931863	1
KRTAP5-2	3	0	0	0	1	0	0	0	10.0439	0.0668674	0.62936	0.172597	0.089225	0.0796702	0.723473	0.844959	0.931863	1
SEL1L2	8	4	1	0	0	0.350653	0.604458	0.604458	0	0.0669089	0.609277	0.186362	1	0.499461	0.723473	0.844959	0.931863	1
FMR1NB	2	0	0	0	0	0	0	0	0	0.0669127	0.516162	0.164829	1	0.461991	0.723473	0.844959	0.931863	1
NDUFAF4	3	0	0	0	0	0	0	0	0	0.066997	0.483053	0.158425	1	0.450319	0.723473	0.844959	0.931863	1
NSRP1	1	0	1	0	1	0	3.38708	3.38708	3.19824	0.0670163	0.359285	0.0685402	0.229838	0.08114	0.723473	0.844959	0.884225	1
ZNF544	5	2	0	0	1	0.253847	0	0	2.49695	0.0670292	0.215687	0.118016	0.274296	0.143421	0.723473	0.844959	0.931863	1
NDUFV1	4	1	0	0	2	0.18087	0	0	7.68954	0.0670873	0.360878	0.146459	0.0456996	0.0402033	0.723473	0.844959	0.931863	1
ALKBH8	0	7	0	0	1	4.87536	0	0	2.67637	0.0671242	0.575355	0.110962	0.261351	0.131673	0.723473	0.844959	0.931863	1
GOLGA8O	1	0	0	0	0	0	0	0	0	0.0671252	0.393771	0.157686	1	0.448956	0.723473	0.844959	0.931863	1
CD33	2	8	0	0	0	3.16481	0	0	0	0.0671626	0.506634	0.120317	1	0.375103	0.723477	0.844959	0.931863	1
KIF5C	3	1	0	0	0	0.168068	0	0	0	0.067209	0.245019	0.130737	1	0.396729	0.723578	0.844959	0.931863	1
GPR101	6	2	0	0	0	0.265072	0	0	0	0.0672888	0.403954	0.150611	1	0.435725	0.724039	0.844959	0.931863	1
RAB34	2	0	0	0	0	0	0	0	0	0.0673372	0.476267	0.161441	1	0.455848	0.724162	0.844959	0.931863	1
RGS7BP	2	0	0	0	0	0	0	0	0	0.0675864	0.480781	0.162413	1	0.457616	0.726442	0.844959	0.931863	1
MTG1	0	5	0	0	0	5.31659	0	0	0	0.0677439	0.68764	0.14739	1	0.429594	0.727735	0.844959	0.931863	1
VDAC1	2	0	1	0	1	0	4.01277	4.01277	6.29513	0.0679274	0.289891	0.0716665	0.134129	0.05426	0.728877	0.844959	0.890686	1
KHDRBS3	0	5	0	0	0	5.3109	0	0	0	0.0679364	0.643372	0.136116	1	0.407565	0.728877	0.844959	0.931863	1
C6orf226	1	4	0	0	0	4.5065	0	0	0	0.067962	0.790981	0.175916	1	0.481613	0.728877	0.845049	0.931863	1
BOC	11	8	0	0	1	0.4405	0	0	1.60199	0.0680585	0.0902303	0.070513	0.364683	0.119849	0.729123	0.844959	0.88992	1
HNRNPM	9	6	0	0	0	0.398493	0	0	0	0.0680595	0.132612	0.0895771	1	0.305696	0.729123	0.844959	0.924428	1
GOLGA8R	1	0	0	0	0	0	0	0	0	0.0681021	0.390091	0.158974	1	0.451329	0.729181	0.844959	0.931863	1
FCGRT	0	5	0	0	0	5.30442	0	0	0	0.0681568	0.702956	0.151929	1	0.438216	0.729202	0.844959	0.931863	1
TXNDC2	5	15	0	0	0	2.30718	0	0	0	0.0681787	0.372947	0.0964172	1	0.321944	0.729202	0.844959	0.929343	1
KRBOX1	4	0	0	0	0	0	0	0	0	0.0683235	0.471973	0.157329	1	0.448296	0.730109	0.844959	0.931863	1
CLDN18	2	0	1	0	0	0	5.23161	5.23161	0	0.0683687	0.219573	0.0577795	1	0.222516	0.730109	0.844959	0.865494	1
PPP1R15B	0	7	0	0	0	4.84459	0	0	0	0.0683755	0.643058	0.133621	1	0.402566	0.730109	0.844959	0.931863	1
TOR2A	0	5	0	0	0	5.29584	0	0	0	0.0684496	0.74043	0.161074	1	0.455177	0.730503	0.844959	0.931863	1
ELOA3	1	0	0	0	0	0	0	0	0	0.0686177	0.586023	0.177928	1	0.485098	0.730658	0.844959	0.931863	1
AK1	0	4	0	0	0	5.72029	0	0	0	0.0686344	0.71901	0.158237	1	0.449972	0.730658	0.844959	0.931863	1
GPR150	4	1	0	0	0	0.182476	0	0	0	0.0686665	0.54797	0.171654	1	0.474155	0.730658	0.844959	0.931863	1
DPH5	2	0	0	0	0	0	0	0	0	0.0687128	0.465081	0.162721	1	0.458176	0.730658	0.844959	0.931863	1
HYKK	0	5	0	0	0	5.28774	0	0	0	0.0687274	0.677193	0.146572	1	0.428025	0.730658	0.844959	0.931863	1
FSD1	0	6	0	0	0	5.01871	0	0	0	0.0687545	0.654494	0.138904	1	0.413096	0.730658	0.844959	0.931863	1
FEM1C	1	9	1	0	0	3.48944	6.24947	6.24947	0	0.0687605	0.191647	0.137036	1	0.409397	0.730658	0.844959	0.931863	1
ECPAS	3	20	1	4	0	2.46128	4.5384	4.5384	0	0.068763	0.0261756	0.0578601	1	0.222746	0.730658	0.844959	0.865494	1
WLS	0	6	1	0	0	5.01514	7.91876	7.91876	0	0.0688913	0.170685	0.140814	1	0.416855	0.731296	0.844959	0.931863	1
DELE1	0	6	0	0	0	5.01416	0	0	0	0.0689287	0.607483	0.125473	1	0.385914	0.731296	0.844959	0.931863	1
SAE1	0	5	0	0	0	5.28172	0	0	0	0.0689351	0.641513	0.137353	1	0.410027	0.731296	0.844959	0.931863	1
GFPT1	1	10	0	0	0	3.41487	0	0	0	0.069026	0.393746	0.0762698	1	0.272548	0.731644	0.844959	0.900808	1
ALPI	1	8	1	0	0	3.57455	5.14008	5.14008	0	0.0691022	0.235363	0.152186	1	0.438699	0.731644	0.844959	0.931863	1
PLEKHG5	9	6	0	0	3	0.39987	0	0	4.93872	0.0691036	0.121238	0.086334	0.059957	0.0324227	0.731644	0.844959	0.92268	1
NRP2	4	17	0	0	1	2.35977	0	0	1.91826	0.0691508	0.2529	0.0566878	0.326569	0.0923644	0.731644	0.844959	0.862928	1
PXDC1	2	0	0	0	0	0	0	0	0	0.069155	0.55518	0.172954	1	0.476442	0.731644	0.844959	0.931863	1
ZNF354A	1	0	0	0	0	0	0	0	0	0.0692061	0.465914	0.16933	1	0.470045	0.73179	0.844959	0.931863	1
GBP4	1	0	0	0	1	0	0	0	2.78911	0.0692806	0.48232	0.171042	0.253828	0.179607	0.732181	0.844959	0.931863	1
SUSD2	5	2	0	0	1	0.256627	0	0	2.17232	0.069335	0.256471	0.13058	0.301333	0.166651	0.73236	0.844959	0.931863	1
DCPS	0	5	0	0	0	5.26892	0	0	0	0.0693783	0.696094	0.152579	1	0.439439	0.732423	0.844959	0.931863	1
FAM237A	3	0	0	0	0	0	0	0	0	0.069462	0.578566	0.173489	1	0.477379	0.73291	0.844959	0.931863	1
ISOC2	0	4	0	0	0	5.68759	0	0	0	0.069604	0.746	0.165919	1	0.463952	0.733697	0.844959	0.931863	1
TRIP12	2	18	0	0	2	2.71717	0	0	1.7519	0.0696426	0.230101	0.0355774	0.273995	0.0548882	0.733697	0.844959	0.760455	1
FIBIN	1	5	0	0	0	4.08456	0	0	0	0.069649	0.728111	0.169396	1	0.470162	0.733697	0.844959	0.931863	1
LGALS8	5	1	0	0	0	0.19281	0	0	0	0.0697631	0.296325	0.136113	1	0.407559	0.734503	0.844959	0.931863	1
SLC30A8	5	1	0	1	0	0.192868	1.93757	1.93757	0	0.0698216	0.571306	0.12701	1	0.389093	0.734528	0.844959	0.931863	1
ACOT13	0	3	1	0	0	6.45645	23.117	23.117	0	0.069996	0.0536204	0.0582755	1	0.223928	0.734528	0.844959	0.865656	1
RABGAP1L	3	1	2	0	0	0.170889	2.42557	2.42557	0	0.0699979	0.334221	0.0514355	1	0.204067	0.734528	0.844959	0.848556	1
PCSK7	0	7	0	0	0	4.80457	0	0	0	0.0700426	0.606186	0.12526	1	0.385471	0.734528	0.844959	0.931863	1
RAD1	2	0	0	0	0	0	0	0	0	0.0700466	0.48466	0.167469	1	0.46673	0.734528	0.844959	0.931863	1
ACKR1	1	6	0	0	0	3.83889	0	0	0	0.0700938	0.692364	0.162833	1	0.45838	0.734528	0.844959	0.931863	1
ICAM2	2	0	0	0	0	0	0	0	0	0.0701167	0.545691	0.173969	1	0.47822	0.734528	0.844959	0.931863	1
LDHA	0	5	0	0	0	5.24776	0	0	0	0.070119	0.665345	0.145995	1	0.426915	0.734528	0.844959	0.931863	1
GLS2	1	0	0	0	0	0	0	0	0	0.0701303	0.443313	0.168742	1	0.469	0.734528	0.844959	0.931863	1
MYO7A	3	18	1	0	1	2.4824	1.48907	1.48907	0.806777	0.0701435	0.731994	0.186885	0.518283	0.322978	0.734528	0.844959	0.931863	1
SETD7	0	5	0	0	0	5.24474	0	0	0	0.0702254	0.667753	0.146834	1	0.428528	0.734528	0.844959	0.931863	1
TSNARE1	3	12	0	0	0	2.64106	0	0	0	0.0702538	0.366149	0.0889767	1	0.304245	0.734528	0.844959	0.924428	1
ZNF680	0	6	0	0	0	4.97982	0	0	0	0.0702613	0.640796	0.137636	1	0.410589	0.734528	0.844959	0.931863	1
FKRP	1	0	0	0	0	0	0	0	0	0.0702912	0.686867	0.187186	1	0.500845	0.734528	0.844959	0.931863	1
IKBKE	1	9	0	1	0	3.46465	3.39169	3.39169	0	0.0704936	0.358805	0.184561	1	0.496428	0.736249	0.844959	0.931863	1
EPHB1	3	16	1	0	1	2.51836	1.95386	1.95386	1.69301	0.0705815	0.575713	0.194984	0.352818	0.25293	0.736626	0.844959	0.931863	1
TMEFF2	0	5	0	0	1	5.23302	0	0	4.76751	0.0706407	0.614043	0.132339	0.168771	0.107244	0.736626	0.844959	0.931863	1
SMARCA2	11	10	0	1	7	0.461853	0.388602	0.388602	7.86595	0.0707395	0.29845	0.167615	0.00813283	0.0103574	0.736626	0.844959	0.931863	0.619607
PLCL2	4	2	0	0	0	0.244105	0	0	0	0.0708583	0.291573	0.143916	1	0.422901	0.736626	0.844959	0.931863	1
F11	1	0	1	0	1	0	3.26453	3.26453	2.85594	0.0708636	0.372495	0.0752575	0.249571	0.093438	0.736626	0.844959	0.900437	1
FAN1	0	8	0	0	0	4.65481	0	0	0	0.0708719	0.565579	0.111923	1	0.357029	0.736626	0.844959	0.931863	1
KIF2B	3	13	1	0	0	2.59851	3.34574	3.34574	0	0.0708761	0.340974	0.171283	1	0.473501	0.736626	0.844959	0.931863	1
ACER2	2	0	0	0	0	0	0	0	0	0.0709035	0.494931	0.170236	1	0.47165	0.736626	0.844959	0.931863	1
FAM171A2	5	2	0	0	0	0.258493	0	0	0	0.0709042	0.4299	0.16269	1	0.45812	0.736626	0.844959	0.931863	1
ASB16	0	6	0	0	0	4.962	0	0	0	0.0709649	0.678225	0.14944	1	0.433504	0.736626	0.844959	0.931863	1
KRTAP4-2	2	5	0	0	0	3.61137	0	0	0	0.0709789	0.673095	0.166679	1	0.465315	0.736626	0.844959	0.931863	1
THUMPD3	0	6	0	0	0	4.96158	0	0	0	0.0709815	0.6002	0.126553	1	0.38815	0.736626	0.844959	0.931863	1
ADAM32	1	10	2	1	1	3.3859	6.31695	6.31695	2.2688	0.0711622	0.04327	0.0781724	0.292751	0.109328	0.737453	0.844959	0.903072	1
AMHR2	1	0	0	0	0	0	0	0	0	0.0711737	0.459588	0.172391	1	0.475453	0.737453	0.844959	0.931863	1
CGN	1	12	1	0	0	3.28348	2.12987	2.12987	0	0.0712056	0.555112	0.194536	1	0.513019	0.737453	0.844959	0.931863	1
PAEP	3	0	0	0	0	0	0	0	0	0.071212	0.518488	0.17056	1	0.472225	0.737453	0.844959	0.931863	1
MSX2	1	6	0	0	0	3.81802	0	0	0	0.0712852	0.697967	0.16627	1	0.464583	0.737821	0.844959	0.931863	1
PAN2	6	4	1	0	0	0.333709	0.773048	0.773048	0	0.0713459	0.803463	0.190083	1	0.505677	0.738058	0.846624	0.931863	1
GRPEL2	0	4	0	0	0	5.62239	0	0	0	0.0715882	0.695724	0.158522	1	0.450497	0.740174	0.844959	0.931863	1
DNAJC8	2	0	0	0	0	0	0	0	0	0.0717328	0.398111	0.15917	1	0.451691	0.741024	0.844959	0.931863	1
SPTB	6	27	0	0	0	2.04012	0	0	0	0.0717462	0.13255	0.0268238	1	0.123885	0.741024	0.844959	0.689524	1
TSTD2	0	6	0	0	0	4.94124	0	0	0	0.0717943	0.60251	0.128584	1	0.392333	0.741027	0.844959	0.931863	1
ST7L	1	0	0	2	1	0	5.82953	5.82953	3.10385	0.0719085	0.0940059	0.0143254	0.234959	0.0225315	0.741027	0.844959	0.537566	0.917196
TSHZ3	4	17	2	0	0	2.34103	5.6146	5.6146	0	0.0719188	0.0753895	0.0817085	1	0.286355	0.741027	0.844959	0.913872	1
CER1	2	0	0	0	0	0	0	0	0	0.0719411	0.603414	0.182729	1	0.493323	0.741027	0.844959	0.931863	1
KCTD6	0	4	0	0	1	5.61046	0	0	7.51184	0.0719587	0.743097	0.170031	0.115292	0.0966845	0.741027	0.844959	0.931863	1
UTP15	0	6	0	0	1	4.93678	0	0	3.44474	0.0719738	0.590642	0.125101	0.217466	0.125262	0.741027	0.844959	0.931863	1
ARL15	1	5	0	0	0	4.03623	0	0	0	0.0720902	0.584704	0.14378	1	0.422637	0.741835	0.844959	0.931863	1
C19orf71	2	0	0	0	0	0	0	0	0	0.0722183	0.544813	0.177997	1	0.485217	0.742763	0.844959	0.931863	1
SCN9A	9	9	0	0	2	0.436542	0	0	1.79771	0.0723678	0.0530736	0.0577743	0.26787	0.0799872	0.743334	0.844959	0.865494	1
FAM219B	2	0	0	0	0	0	0	0	0	0.0724159	0.552611	0.179143	1	0.487192	0.743334	0.844959	0.931863	1
TSPAN14	2	0	0	0	0	0	0	0	0	0.0724415	0.508333	0.174624	1	0.479364	0.743334	0.844959	0.931863	1
ASIC1	0	6	2	0	2	4.92424	16.287	16.287	6.2185	0.0724818	0.0202945	0.0422717	0.0626362	0.0183596	0.743334	0.844959	0.810064	0.837179
HNF1B	1	8	0	0	0	3.52424	0	0	0	0.0724877	0.510534	0.119181	1	0.372693	0.743334	0.844959	0.931863	1
RBP2	0	3	0	0	0	6.35223	0	0	0	0.0725031	0.753634	0.175113	1	0.480217	0.743334	0.844959	0.931863	1
PDGFA	0	4	0	0	0	5.59155	0	0	0	0.0725509	0.722267	0.166621	1	0.465211	0.743334	0.844959	0.931863	1
TEKT3	0	6	0	1	1	4.92101	8.63731	8.63731	3.64118	0.0726132	0.155811	0.138783	0.208524	0.13146	0.743334	0.844959	0.931863	1
AK8	2	9	0	0	0	3.01298	0	0	0	0.0726233	0.445475	0.110405	1	0.353693	0.743334	0.844959	0.931863	1
DLG1	4	2	0	0	0	0.246228	0	0	0	0.0726539	0.139069	0.106714	1	0.345497	0.743334	0.844959	0.931863	1
CPEB2	0	7	0	0	0	4.74259	0	0	0	0.0727159	0.649607	0.143104	1	0.421324	0.743375	0.844959	0.931863	1
ZMYND19	2	0	0	0	1	0	0	0	7.84131	0.0727339	0.486805	0.172723	0.111069	0.0950323	0.743375	0.844959	0.931863	1
MARCHF3	2	0	0	0	0	0	0	0	0	0.0728074	0.55886	0.18051	1	0.489538	0.743634	0.844959	0.931863	1
MED16	5	2	0	0	0	0.260777	0	0	0	0.072849	0.299004	0.144595	1	0.424216	0.743634	0.844959	0.931863	1
ZNF354C	0	6	2	0	0	4.91397	15.474	15.474	0	0.0729009	0.0224021	0.0458566	1	0.187198	0.743634	0.844959	0.832956	1
FFAR4	1	7	0	0	0	3.63264	0	0	0	0.0729113	0.637653	0.155339	1	0.444602	0.743634	0.844959	0.931863	1
FAM177A1	0	4	0	2	1	5.56456	26.0763	26.0763	7.54354	0.0734066	0.00801551	0.018266	0.114872	0.0150374	0.745198	0.712725	0.594354	0.756201
TTC39B	5	2	0	0	0	0.261173	0	0	0	0.0731884	0.160724	0.109685	1	0.352103	0.745198	0.844959	0.931863	1
TMEM43	1	7	1	1	0	3.62734	10.2524	10.2524	0	0.0732555	0.0329244	0.0524277	1	0.207001	0.745198	0.844959	0.84871	1
PTAR1	1	7	0	0	0	3.62616	0	0	0	0.0733323	0.513108	0.122641	1	0.380002	0.745198	0.844959	0.931863	1
CD96	0	6	0	0	0	4.90305	0	0	0	0.0733493	0.57902	0.123458	1	0.381715	0.745198	0.844959	0.931863	1
PARVB	0	5	0	0	0	5.15835	0	0	0	0.0733535	0.640592	0.144773	1	0.42456	0.745198	0.844959	0.931863	1
SSMEM1	0	4	0	0	0	5.56445	0	0	0	0.0734101	0.697345	0.162359	1	0.457518	0.745198	0.844959	0.931863	1
MARCHF5	1	0	0	0	0	0	0	0	0	0.0734756	0.492736	0.180039	1	0.48873	0.745198	0.844959	0.931863	1
GIMAP4	0	5	0	0	0	5.15476	0	0	0	0.0734872	0.731737	0.169082	1	0.469604	0.745198	0.844959	0.931863	1
SLC2A12	0	6	0	0	0	4.89962	0	0	0	0.073491	0.670177	0.151794	1	0.43796	0.745198	0.844959	0.931863	1
RNMT	1	0	2	0	1	0	6.91722	6.91722	3.54023	0.0735238	0.0690515	0.0110099	0.213025	0.0165473	0.745198	0.844959	0.494837	0.796318
RNF25	1	8	0	0	0	3.50884	0	0	0	0.0735599	0.458872	0.104811	1	0.341223	0.745198	0.844959	0.931863	1
DNAH8	4	28	1	1	3	2.20445	1.2514	1.2514	1.13922	0.0734785	0.791601	0.170601	0.359554	0.23256	0.745198	0.845222	0.931863	1
RRP9	0	6	0	0	0	4.8955	0	0	0	0.0736615	0.615893	0.135833	1	0.407	0.745391	0.844959	0.931863	1
KLK3	2	0	0	1	0	0	4.87058	4.87058	0	0.0736703	0.236827	0.0663901	1	0.246454	0.745391	0.844959	0.881511	1
GMFG	0	3	0	0	0	6.30439	0	0	0	0.0736932	0.704525	0.167166	1	0.466186	0.745391	0.844959	0.931863	1
FMO4	0	6	0	0	1	4.89191	0	0	3.19824	0.0738104	0.607259	0.133342	0.229838	0.137459	0.745521	0.844959	0.931863	1
FMO2	0	6	0	0	0	4.89089	0	0	0	0.0738527	0.635969	0.142365	1	0.419887	0.745521	0.844959	0.931863	1
ZNF615	3	1	0	0	0	0.174779	0	0	0	0.0739186	0.263471	0.144293	1	0.423631	0.745521	0.844959	0.931863	1
CTDNEP1	2	0	0	0	1	0	0	0	7.29722	0.073946	0.512828	0.177962	0.11822	0.102278	0.745521	0.844959	0.931863	1
HABP2	2	10	1	2	0	2.93219	7.87006	7.87006	0	0.0740051	0.0186623	0.0375303	1	0.160727	0.745521	0.844959	0.769568	1
TKFC	1	0	0	0	1	0	0	0	3.10385	0.0740149	0.540058	0.185347	0.234959	0.180026	0.745521	0.844959	0.931863	1
CHMP2B	1	5	0	0	0	3.99938	0	0	0	0.0740189	0.54893	0.137672	1	0.410659	0.745521	0.844959	0.931863	1
C1GALT1	0	5	0	0	0	5.14046	0	0	0	0.0740218	0.680763	0.157259	1	0.448166	0.745521	0.844959	0.931863	1
UBE2D4	0	3	0	0	0	6.28975	0	0	0	0.0740626	0.693012	0.165207	1	0.462671	0.745521	0.844959	0.931863	1
ZNF708	14	8	1	0	0	0.467987	0.645577	0.645577	0	0.0742246	0.651137	0.202092	1	0.525243	0.745521	0.844959	0.931863	1
CXCL14	0	3	0	0	0	6.28141	0	0	0	0.074274	0.754524	0.178854	1	0.486695	0.745521	0.844959	0.931863	1
CACNB4	0	6	0	0	0	4.88058	0	0	0	0.0742829	0.576705	0.124114	1	0.383084	0.745521	0.844959	0.931863	1
SLC43A2	6	2	0	0	1	0.273374	0	0	3.11467	0.0743458	0.254024	0.133684	0.234361	0.139833	0.745521	0.844959	0.931863	1
FAM133A	0	4	0	0	0	5.53457	0	0	0	0.0743719	0.695543	0.16372	1	0.459988	0.745521	0.844959	0.931863	1
LRRC43	0	6	1	0	0	4.87797	9.21403	9.21403	0	0.074392	0.145526	0.135544	1	0.406422	0.745521	0.844959	0.931863	1
AC100868.1	2	11	0	0	0	2.87449	0	0	0	0.0744894	0.37688	0.0894963	1	0.305501	0.745521	0.844959	0.924428	1
OIP5	2	0	0	0	1	0	0	0	7.77312	0.0745538	0.565255	0.184545	0.111918	0.100788	0.745521	0.844959	0.931863	1
BDH2	2	0	0	0	0	0	0	0	0	0.0745612	0.483793	0.175734	1	0.481297	0.745521	0.844959	0.931863	1
PUS7	9	5	2	0	0	0.390482	1.23865	1.23865	0	0.0746327	0.787209	0.151315	1	0.437056	0.745521	0.844959	0.931863	1
KDM2B	1	11	0	0	0	3.28645	0	0	0	0.0746398	0.460874	0.103349	1	0.337915	0.745521	0.844959	0.931863	1
TYR	0	6	0	0	0	4.87144	0	0	0	0.0746662	0.636864	0.144024	1	0.42311	0.745521	0.844959	0.931863	1
SP140L	1	0	0	0	0	0	0	0	0	0.0747004	0.422394	0.174612	1	0.479342	0.745521	0.844959	0.931863	1
POLRMT	15	12	0	0	0	0.509197	0	0	0	0.0747491	0.0712666	0.0623532	1	0.23538	0.745521	0.844959	0.872559	1
L3MBTL4	1	9	0	0	0	3.40634	0	0	0	0.0747605	0.415939	0.0909857	1	0.309083	0.745521	0.844959	0.924428	1
CEP70	0	6	0	0	0	4.86871	0	0	0	0.0747813	0.531357	0.109349	1	0.351361	0.745521	0.844959	0.931863	1
FAM185A	1	7	0	0	0	3.60385	0	0	0	0.0748031	0.530313	0.129923	1	0.395071	0.745521	0.844959	0.931863	1
SWSAP1	2	0	0	0	0	0	0	0	0	0.0748263	0.549139	0.18349	1	0.494614	0.745521	0.844959	0.931863	1
ZBTB5	0	7	1	0	1	4.69541	12.1877	12.1877	2.6369	0.0748278	0.107903	0.114105	0.264092	0.135667	0.745521	0.844959	0.931863	1
CD82	0	4	1	0	0	5.51875	10.8215	10.8215	0	0.0748875	0.122613	0.116766	1	0.367532	0.745521	0.844959	0.931863	1
PLCH1	3	19	1	0	1	2.43235	1.19747	1.19747	1.05538	0.074859	0.873988	0.179736	0.457574	0.287691	0.745521	0.888338	0.931863	1
PXDN	7	25	0	1	0	1.98318	1.07116	1.07116	0	0.0746143	0.948751	0.186789	1	0.500179	0.745521	0.954263	0.931863	1
H2AFV	1	4	0	0	0	4.34131	0	0	0	0.074998	0.677262	0.171839	1	0.474482	0.745925	0.844959	0.931863	1
SCARA5	1	8	0	0	0	3.48629	0	0	0	0.075162	0.588606	0.145755	1	0.426455	0.745925	0.844959	0.931863	1
PLP1	2	0	0	0	0	0	0	0	0	0.0752062	0.532524	0.182495	1	0.492925	0.745925	0.844959	0.931863	1
POTEB2	1	0	0	0	0	0	0	0	0	0.075252	0.473835	0.181466	1	0.491171	0.745925	0.844959	0.931863	1
AC116366.3	0	9	1	0	4	4.46666	3.39568	3.39568	5.89067	0.0752533	0.394735	0.205322	0.0325782	0.0401829	0.745925	0.844959	0.931863	1
SLC1A6	0	6	0	0	0	4.8572	0	0	0	0.0752682	0.710651	0.166094	1	0.464267	0.745925	0.844959	0.931863	1
HSPA1A	1	0	0	0	0	0	0	0	0	0.0753037	0.670156	0.196944	1	0.516946	0.745925	0.844959	0.931863	1
GRK5	1	0	1	0	0	0	3.81806	3.81806	0	0.0753044	0.319006	0.0709574	1	0.258688	0.745925	0.844959	0.890686	1
CD8B	2	0	1	0	0	0	5.36849	5.36849	0	0.0753094	0.21363	0.0625305	1	0.235871	0.745925	0.844959	0.872559	1
SOX21	0	5	0	0	0	5.10961	0	0	0	0.0751913	0.82866	0.191636	1	0.508249	0.745925	0.856642	0.931863	1
ASB10	2	10	0	0	0	2.9174	0	0	0	0.0754514	0.512378	0.132806	1	0.400923	0.746158	0.844959	0.931863	1
IDS	1	0	1	0	0	0	4.8455	4.8455	0	0.0754518	0.250231	0.0581284	1	0.22351	0.746158	0.844959	0.865656	1
UTP14A	0	7	0	0	0	4.68094	0	0	0	0.0754892	0.552544	0.115676	1	0.365185	0.746158	0.844959	0.931863	1
XPO1	5	3	0	0	1	0.299958	0	0	1.66774	0.0755023	0.1153	0.0977692	0.356033	0.151693	0.746158	0.844959	0.929846	1
CMPK1	2	0	1	0	0	0	4.62972	4.62972	0	0.0755236	0.249801	0.07109	1	0.259038	0.746158	0.844959	0.890686	1
SPDYE4	3	8	0	0	0	2.83638	0	0	0	0.0755947	0.384594	0.10518	1	0.342054	0.746262	0.844959	0.931863	1
ZNF157	1	0	0	0	0	0	0	0	0	0.0756858	0.499115	0.184847	1	0.496911	0.746262	0.844959	0.931863	1
ATP7A	0	9	0	0	0	4.45464	0	0	0	0.0758658	0.544057	0.110225	1	0.353298	0.746262	0.844959	0.931863	1
RCBTB2	1	0	0	0	0	0	0	0	0	0.075901	0.488769	0.18422	1	0.495851	0.746262	0.844959	0.931863	1
LYZL6	0	3	0	0	0	6.2177	0	0	0	0.0759159	0.748562	0.180959	1	0.490305	0.746262	0.844959	0.931863	1
AADAC	0	5	0	0	0	5.09048	0	0	0	0.0759273	0.673167	0.158638	1	0.450711	0.746262	0.844959	0.931863	1
YTHDF1	1	0	0	0	0	0	0	0	0	0.0759952	0.571329	0.191792	1	0.508506	0.746262	0.844959	0.931863	1
ZNF286B	1	0	0	0	1	0	0	0	3.41839	0.0759976	0.494336	0.184962	0.218724	0.170219	0.746262	0.844959	0.931863	1
VEGFB	2	0	0	1	0	0	6.04528	6.04528	0	0.0760329	0.188169	0.0569933	1	0.220269	0.746262	0.844959	0.862928	1
BMPR1B	0	6	0	1	1	4.83918	6.50136	6.50136	3.35426	0.0760382	0.20935	0.168085	0.221849	0.159936	0.746262	0.844959	0.931863	1
DIS3L	0	8	0	1	0	4.54513	5.19662	5.19662	0	0.0760461	0.262492	0.188549	1	0.503123	0.746262	0.844959	0.931863	1
PI4K2A	0	6	0	0	0	4.83892	0	0	0	0.0760493	0.658431	0.152931	1	0.4401	0.746262	0.844959	0.931863	1
ZNF345	1	0	0	0	0	0	0	0	0	0.0760563	0.517296	0.187289	1	0.501016	0.746262	0.844959	0.931863	1
CD9	2	0	0	0	0	0	0	0	0	0.0761909	0.500719	0.180769	1	0.48998	0.746262	0.844959	0.931863	1
ANKH	4	1	1	0	0	0.189947	2.31981	2.31981	0	0.0762137	0.484624	0.115872	1	0.365606	0.746262	0.844959	0.931863	1
GEMIN5	2	15	0	0	1	2.72216	0	0	1.18477	0.0762259	0.276814	0.0554269	0.431444	0.11319	0.746262	0.844959	0.86079	1
ADAMTS10	5	20	0	3	0	2.16452	3.97067	3.97067	0	0.0762643	0.0774076	0.0957128	1	0.320294	0.746262	0.844959	0.929343	1
KCNJ6	0	5	0	0	0	5.08113	0	0	0	0.0762903	0.71022	0.169218	1	0.469845	0.746262	0.844959	0.931863	1
[truncated: 17,564 more rows]
