# Supplementary material for: Epigenetic Plasticity Drives Carcinogenesis and Multi-Therapy Resistance in Multiple Myeloma
Source: Research Square preprint supplement (doi:10.21203/rs.3.rs-6306816/v1), 2025-04-15
Supplement: Supplementary file 7 [file 42fcbf11882132925890000b.xlsx]

## Sheet: Sheet1
Supplementary Table 2. Mutation frequencies in MM cohorts.
Whole cohort
	PMRC	MMRF CoMMpass1	Walker et al.2	Bolli et al.3	Lohr et al.4
Cohort size (n)	835	995*	463	418	203
Mutations
KRAS	0.211	0.260042	0.212	0.258	0.232
NRAS	0.168	0.209302	0.194	0.225	0.202
BRAF	0.08	0.0761099	0.067	0.086	0.059
KRAS, NRAS or BRAF (RAS/MAPK pathway)	0.4	0.488372	0.432	0.526	0.458
KRAS + NRAS (co-mutation)	0.03	0.0348837	0.02	0.019	0.015
DIS3	0.089	0.100423	0.086	0.077	0.108
TENT5C	0.08	0.110994	0.056	0.084	0.113
DIS3 or TENT5C	0.154	0.201903	N/A	0.155	0.207
TP53	0.078	0.0486258	0.03	0.079	0.079
ATM	0.056	0.0348837	0.03	0.045	0.025
ATR	0.051	0.0105708	0.013	0.038	0.01
TP53, ATM or ATR	0.168	0.0909091	0.145	0.158	0.113
TRAF3, CYLD or LTB (NF-κB pathway)	0.134	0.131078	N/A	0.12	0.079
TRAF3	0.053	0.079	0.037	0.043	0.049
IRF4	0.037	0.0221987	0.032	0.055	0.02
K123R among IRF4-mutated	0.613	0.571	0.533	0.522	0.75
PRDM1	0.03	0.02537	N/A	0.029	0.054
SMM only
	PMRC	Bustoros et al.5		Boyle et al.6
Cohort size (n)	60	213		77
Mutations
KRAS	0.183	0.14		0.14
NRAS	0.083	0.07		0.052
TENT5C	0.017	0.028		N/A
TRAF3	0.033	N/A		0.026
* Mutation frequencies were calculated from a subcohort of 946 NDMM samples.
References
1. Skerget, S. et al. Comprehensive molecular profiling of multiple myeloma identifies refined copy number and expression subtypes. Nat Genetics 56, 1878-1889, doi:10.1038/s41588-024-01853-0 (2024).
2. Walker, B. A. et al. Mutational Spectrum, Copy Number Changes, and Outcome: Results of a Sequencing Study of Patients With Newly Diagnosed Myeloma. J Clin Oncol 33, 3911-3920, doi:10.1200/JCO.2014.59.1503 (2015).
3. Bolli, N. et al. Analysis of the genomic landscape of multiple myeloma highlights novel prognostic markers and disease subgroups. Leukemia 32, 2604-2616, doi:10.1038/s41375-018-0037-9 (2018).
4. Lohr, J. G. et al. Widespread genetic heterogeneity in multiple myeloma: implications for targeted therapy. Cancer Cell 25, 91-101, doi:10.1016/j.ccr.2013.12.015 (2014).
5. Bustoros, M. et al. Genomic Profiling of Smoldering Multiple Myeloma Identifies Patients at a High Risk of Disease Progression. J Clin Oncol 38, 2380-2389, doi:10.1200/JCO.20.00437 (2020).
6. Boyle, E. M. et al. The molecular make up of smoldering myeloma highlights the evolutionary pathways leading to multiple myeloma. Nat Commun 12, 293, doi:10.1038/s41467-020-20524-2 (2021).
