# Supplementary material for: Epigenetic Plasticity Drives Carcinogenesis and Multi-Therapy Resistance in Multiple Myeloma
Source: Research Square preprint supplement (doi:10.21203/rs.3.rs-6306816/v1), 2025-04-15
Supplement: Supplementary file 8 [file 79a6b5043457ab039e894e9f.xlsx]

## Sheet: Genes
Gene ID	Gene Name	Chromosome	Gene Start	Gene End	Gene Length	Gene Strand	IntervalCount	Intervals	Interval Dists to Start	Interval Pos	NDMM_1_Present	NDMM_2_Present	NDMM_3_Present	NDMM_4_Present	LRMM_1_Present	LRMM_2_Present	LRMM_3_Present	LRMM_4_Present	NDMM_1_AvgPeak	NDMM_2_AvgPeak	NDMM_3_AvgPeak	NDMM_4_AvgPeak	LRMM_1_AvgPeak	LRMM_2_AvgPeak	LRMM_3_AvgPeak	LRMM_4_AvgPeak	MergedRegCount	Peak Sample	Peak Value	UCSC Link	Altsymbols	Full Description	RNA	Affy Tag	PROT
GeneID:101927688	SEPT4-AS1	17	58519837	58556925	37088	+	8	NDMM_1::6816, NDMM_2::6272, NDMM_3::5052, LRMM_1::7850, LRMM_2::7634, LRMM_3::5159, NDMM_4::7950, LRMM_4::7832	-1789, -2077, -1949, -1949, -2045, -1949, -1789, -1949	upstream, upstream, upstream, upstream, upstream, upstream, upstream, upstream	1	1	1	1	1	1	1	1	85	99	67	174	310	82	77	602	1	LRMM_4	602	Gene SEPT4-AS1	RP11-112H10.4, SEPT4-AS1	SEPT4 antisense RNA 1	NR_110810.1
GeneID:5414	SEPT4	17	58520250	58540818	20568	-	8	NDMM_1::6816, NDMM_2::6272, NDMM_3::5052, LRMM_1::7850, LRMM_2::7634, LRMM_3::5159, NDMM_4::7950, LRMM_4::7832	22770, 23058, 22930, 22930, 23026, 22930, 22770, 22930	downstream, downstream, downstream, downstream, downstream, downstream, downstream, downstream	1	1	1	1	1	1	1	1	85	99	67	174	310	82	77	602	1	LRMM_4	602	Gene SEPT4	SEPT4, H5, hCDCREL-2, BRADEION, SEP4, ARTS, hucep-7, MART, CE5B3, PNUTL2	septin 4	NM_001198713.1, NM_001256782.1, NM_001256822.1, NM_004574.4, NM_080415.3, NM_080416.3, NR_037155.2, NR_104196.1, NR_104197.1, XM_006721949.1, XM_006721951.1, XM_006721952.1, XM_006721954.1, XM_006721955.1, XM_011524910.1, XM_011524911.1, XM_006721950.2, X		NP_001185642.1, NP_001243711.1, NP_001243751.1, NP_004565.1, NP_536340.1, NP_536341.1, XP_006722012.1, XP_006722014.1, XP_006722015.1, XP_006722017.1, XP_006722018.1
GeneID:3542	IGLC6	22	22919535	22919858	323	+	8	NDMM_1::10119, NDMM_2::9536, NDMM_3::7343, LRMM_1::12137, LRMM_2::11373, LRMM_3::7746, NDMM_4::12346, LRMM_4::11813	9297, 9297, 9297, 9297, 9361, 9281, 9297, 9297	downstream, downstream, downstream, downstream, downstream, downstream, downstream, downstream	1	1	1	1	1	1	1	1	100	163	126	430	302	325	205	512	1	LRMM_4	512	Gene IGLC6	IGLC6, IGLC	immunoglobulin lambda constant 6 (Kern+Oz- marker, gene/pseudogene)
GeneID:28827	IGLJ7	22	22921398	22921435	37	+	8	NDMM_1::10119, NDMM_2::9536, NDMM_3::7343, LRMM_1::12137, LRMM_2::11373, LRMM_3::7746, NDMM_4::12346, LRMM_4::11813	7434, 7434, 7434, 7434, 7498, 7418, 7434, 7434	downstream, downstream, downstream, downstream, downstream, downstream, downstream, downstream	1	1	1	1	1	1	1	1	100	163	126	430	302	325	205	512	1	LRMM_4	512	Gene IGLJ7	J7, IGLJ7	immunoglobulin lambda joining 7
GeneID:51272	BET1L	11	202924	207422	4498	-	8	NDMM_1::2248, NDMM_2::2304, NDMM_3::1820, LRMM_1::2838, LRMM_2::2822, LRMM_3::1894, NDMM_4::2667, LRMM_4::2775	-98, -98, -98, -98, -98, -162, -98, -98	upstream, upstream, upstream, upstream, upstream, upstream, upstream, upstream	1	1	1	1	1	1	1	1	194	137	101	262	496	187	117	505	1	LRMM_4	505	Gene BET1L	BET1L, HSPC197, GS15, BET1L1, GOLIM3	Bet1 golgi vesicular membrane trafficking protein like	NM_016526.4, NM_001098787.1		NP_057610.2, NP_001092257.1
GeneID:60626	RIC8A	11	207511	215175	7664	+	8	NDMM_1::2248, NDMM_2::2304, NDMM_3::1820, LRMM_1::2838, LRMM_2::2822, LRMM_3::1894, NDMM_4::2667, LRMM_4::2775	9, 9, 9, 9, 9, 73, 9, 9	in gene, in gene, in gene, in gene, in gene, in gene, in gene, in gene	1	1	1	1	1	1	1	1	194	137	101	262	496	187	117	505	1	LRMM_4	505	Gene RIC8A	RIC8A, MGC104517, RIC8, MGC131931, MGC148073, synembryn, MGC148074	RIC8 guanine nucleotide exchange factor A	NM_021932.5, NM_001286134.1, XM_011520267.1, XM_011520268.1, XM_011520269.1, XM_011520270.1, XM_011520271.1, XM_005253052.2, XM_011520272.1		NP_068751.4, NP_001273063.1
GeneID:102465445	MIR6743	11	209336	209406	70	+	8	NDMM_1::2248, NDMM_2::2304, NDMM_3::1820, LRMM_1::2838, LRMM_2::2822, LRMM_3::1894, NDMM_4::2667, LRMM_4::2775	-1816, -1816, -1816, -1816, -1816, -1752, -1816, -1816	upstream, upstream, upstream, upstream, upstream, upstream, upstream, upstream	1	1	1	1	1	1	1	1	194	137	101	262	496	187	117	505	1	LRMM_4	505	Gene MIR6743	MIR6743, hsa-mir-6743	microRNA 6743
GeneID:103352539	LINC01410	9	62801465	62813486	12021	+	18	NDMM_1::16241, NDMM_1::16242, NDMM_2::15167, NDMM_2::15168, NDMM_3::11633, NDMM_3::11634, LRMM_1::19371, LRMM_1::19372, LRMM_2::18445, LRMM_2::18446, LRMM_2::18447, LRMM_3::12126, LRMM_3::12127, LRMM_3::12128, NDMM_4::19629, NDMM_4::19630, LRMM_4::18190, LRMM_4::18191	-1561, 1095, -1305, 1127, -1561, 1095, -1561, 1095, -1561, -1049, 1127, -1689, -1209, 1095, -1209, 1095, -1529, 1095	upstream, in gene, upstream, in gene, upstream, in gene, upstream, in gene, upstream, upstream, in gene, upstream, upstream, in gene, upstream, in gene, upstream, in gene	1	1	1	1	1	1	1	1	116.5	115.5	133	144.5	228	69	125	438	2	LRMM_4	587	Gene LINC01410	LINC01410	long intergenic non-protein coding RNA 1410	NR_121647.1
GeneID:100873536	RNA5SP283	9	62802320	62802438	118	-	18	NDMM_1::16241, NDMM_1::16242, NDMM_2::15167, NDMM_2::15168, NDMM_3::11633, NDMM_3::11634, LRMM_1::19371, LRMM_1::19372, LRMM_2::18445, LRMM_2::18446, LRMM_2::18447, LRMM_3::12126, LRMM_3::12127, LRMM_3::12128, NDMM_4::19629, NDMM_4::19630, LRMM_4::18190, LRMM_4::18191	2534, -122, 2278, -154, 2534, -122, 2534, -122, 2534, 2022, -154, 2662, 2182, -122, 2182, -122, 2502, -122	downstream, upstream, downstream, upstream, downstream, upstream, downstream, upstream, downstream, downstream, upstream, downstream, downstream, upstream, downstream, upstream, downstream, upstream	1	1	1	1	1	1	1	1	116.5	115.5	133	144.5	228	69	125	438	2	LRMM_4	587	Gene RNA5SP283	RN5S283, RNA5SP283	RNA, 5S ribosomal pseudogene 283
GeneID:101929200	LOC101929200	5	5390103	5422123	32020	-	9	NDMM_1::12293, NDMM_2::11707, NDMM_3::8924, LRMM_1::14623, LRMM_2::14173, LRMM_3::9395, LRMM_3::9396, NDMM_4::14945, LRMM_4::14110	-309, -341, -341, -341, -341, -341, -917, -309, -309	upstream, upstream, upstream, upstream, upstream, upstream, upstream, upstream, upstream	1	1	1	1	1	1	1	1	188	135	90	271	354	199	120	430	1	LRMM_4	430	Gene LOC101929200		uncharacterized LOC101929200	XR_952534.1, XR_251741.3, XR_952535.1, XR_952543.1, XR_952547.1, XR_925722.1, XR_241729.3, XR_925723.1, XR_925724.1, XR_925725.1
GeneID:23379	ICE1	5	5422673	5490234	67561	+	9	NDMM_1::12293, NDMM_2::11707, NDMM_3::8924, LRMM_1::14623, LRMM_2::14173, LRMM_3::9395, LRMM_3::9396, NDMM_4::14945, LRMM_4::14110	-241, -209, -209, -209, -209, -209, 367, -241, -241	upstream, upstream, upstream, upstream, upstream, upstream, in gene, upstream, upstream	1	1	1	1	1	1	1	1	188	135	90	271	354	199	120	430	1	LRMM_4	430	Gene ICE1	KIAA0947, ICE1, DKFZp781J2344	interactor of little elongation complex ELL subunit 1	NM_015325.2, XM_011513999.1, XR_925602.1		NP_056140.1
GeneID:283232	TMEM80	11	695591	705028	9437	+	9	NDMM_1::2264, NDMM_2::2314, NDMM_3::1834, NDMM_3::1835, LRMM_1::2860, LRMM_2::2838, LRMM_3::1903, NDMM_4::2685, LRMM_4::2795	-103, -103, -263, 409, -103, -231, -199, -199, -199	upstream, upstream, upstream, in gene, upstream, upstream, upstream, upstream, upstream	1	1	1	1	1	1	1	1	157	111	50	312	534	112	76	427	1	LRMM_1	534	Gene TMEM80	FLJ55823, FLJ38216, TMEM80	transmembrane protein 80	NM_001042463.2, NM_001276274.1, NM_174940.3, NM_001276253.1, XM_006718206.2		NP_001035928.2, NP_001263203.1, NP_777600.3, NP_001263182.1
GeneID:105376508	LOC105376508	11	697607	706658	9051	-	9	NDMM_1::2264, NDMM_2::2314, NDMM_3::1834, NDMM_3::1835, LRMM_1::2860, LRMM_2::2838, LRMM_3::1903, NDMM_4::2685, LRMM_4::2795	11170, 11170, 11330, 10658, 11170, 11298, 11266, 11266, 11266	downstream, downstream, downstream, downstream, downstream, downstream, downstream, downstream, downstream	1	1	1	1	1	1	1	1	157	111	50	312	534	112	76	427	1	LRMM_1	534	Gene LOC105376508		uncharacterized LOC105376508	XR_960096.1, XR_930961.1
GeneID:64787	EPS8L2	11	706120	727727	21607	+	6	NDMM_1::2264, NDMM_2::2314, NDMM_3::1835, LRMM_1::2860, NDMM_4::2685, LRMM_4::2795	-10632, -10632, -10120, -10632, -10728, -10728	upstream, upstream, upstream, upstream, upstream, upstream	1	1	1	1	1	0	0	1	157	111	50	312	534	112	76	427	1	LRMM_1	534	Gene EPS8L2	FLJ22171, MGC126530, FLJ21935, FLJ16738, MGC3088, EPS8R2, EPS8L2	EPS8 like 2	NM_022772.3		NP_073609.2
GeneID:51174	TUBD1	17	59859479	59892945	33466	-	8	NDMM_1::6830, NDMM_2::6289, NDMM_3::5066, LRMM_1::7866, LRMM_2::7659, LRMM_3::5173, NDMM_4::7967, LRMM_4::7857	-239, -271, -431, -287, -303, -271, -143, -239	upstream, upstream, upstream, upstream, upstream, upstream, upstream, upstream	1	1	1	1	1	1	1	1	129	105	59	113	198	110	65	420	1	LRMM_4	420	Gene TUBD1	TUBD1, FLJ12709, TUBD	tubulin delta 1	NM_016261.3, NM_001193609.1, NM_001193610.1, NM_001193611.1, NM_001193612.1, NM_001193613.1, XM_005257425.1, XM_011524871.1		NP_057345.2, NP_001180538.1, NP_001180539.1, NP_001180540.1, NP_001180541.1, NP_001180542.1, XP_005257482.1
GeneID:6198	RPS6KB1	17	59893046	59950426	57380	+	8	NDMM_1::6830, NDMM_2::6289, NDMM_3::5066, LRMM_1::7866, LRMM_2::7659, LRMM_3::5173, NDMM_4::7967, LRMM_4::7857	138, 170, 330, 186, 202, 170, 42, 138	in gene, in gene, in gene, in gene, in gene, in gene, in gene, in gene	1	1	1	1	1	1	1	1	129	105	59	113	198	110	65	420	1	LRMM_4	420	Gene RPS6KB1	RPS6KB1, p70(S6K)-alpha, S6K, p70-S6K, p70-alpha, STK14A, PS6K, S6K1	ribosomal protein S6 kinase B1	NM_001272042.1, NM_003161.3, NM_001272044.1, NM_001272060.1, NM_001272043.1, XM_006722010.1, XM_011525101.1, XM_011525102.1, XM_011525103.1, XM_011525104.1		NP_001258971.1, NP_003152.1, NP_001258973.1, NP_001258989.1, NP_001258972.1, XP_006722073.1
GeneID:28834	IGLC7	22	22922594	22922913	319	+	15	NDMM_1::10119, NDMM_1::10120, NDMM_2::9536, NDMM_2::9537, NDMM_3::7343, LRMM_1::12137, LRMM_1::12138, LRMM_2::11373, LRMM_2::11374, LRMM_3::7746, LRMM_3::7747, NDMM_4::12346, NDMM_4::12347, LRMM_4::11813, LRMM_4::11814	6238, 9502, 6238, 9502, 6238, 6238, 9406, 6302, 9502, 6222, 9502, 6238, 9550, 6238, 9502	downstream, downstream, downstream, downstream, downstream, downstream, downstream, downstream, downstream, downstream, downstream, downstream, downstream, downstream, downstream	1	1	1	1	1	1	1	1	106.5	128	91.5	326.5	247	278	181.5	397.5	2	LRMM_4	512	Gene IGLC7	IGLC7, C7	immunoglobulin lambda constant 7
GeneID:85365	ALG2	9	99216425	99221964	5539	-	8	NDMM_1::16405, NDMM_2::15334, NDMM_3::11744, LRMM_1::19622, LRMM_2::18651, LRMM_3::12246, NDMM_4::19845, LRMM_4::18384	-180, -212, -180, -180, -212, -212, -212, -180	upstream, upstream, upstream, upstream, upstream, upstream, upstream, upstream	1	1	1	1	1	1	1	1	190	134	143	313	484	185	156	395	1	LRMM_1	484	Gene ALG2	NET38, FLJ14511, ALG2, CMSTA3, hALPG2, CDGIi, CMS14	ALG2, alpha-1,3/1,6-mannosyltransferase	NM_033087.3, NR_024532.1		NP_149078.1
GeneID:3313	HSPA9	5	138554882	138575629	20747	-	8	NDMM_1::12987, NDMM_2::12301, NDMM_3::9341, LRMM_1::15330, LRMM_2::14995, LRMM_3::9822, NDMM_4::15652, LRMM_4::14785	93, 77, 141, 45, 109, 93, 109, 13	in gene, in gene, in gene, in gene, in gene, in gene, in gene, in gene	1	1	1	1	1	1	1	1	197	110	92	219	386	180	82	391	1	LRMM_4	391	Gene HSPA9	GRP75, HSPA9B, CRP40, MGC4500, MOT2, MTHSP75, PBP74, CSA, HSPA9, MOT, mot-2, SAAN, EVPLS, HEL-S-124m	heat shock protein family A (Hsp70) member 9	NM_004134.6		NP_004125.3
GeneID:25921	ZDHHC5	11	57668002	57701187	33185	+	9	NDMM_1::2546, NDMM_2::2566, NDMM_3::2014, LRMM_1::3199, LRMM_2::3118, LRMM_3::2091, NDMM_4::3028, LRMM_4::3088, LRMM_4::3089	-322, -322, -397, -322, -322, -322, -322, -930, -322	upstream, upstream, upstream, upstream, upstream, upstream, upstream, upstream, upstream	1	1	1	1	1	1	1	1	161	138	69	246	379	116	98	369	1	LRMM_1	379	Gene ZDHHC5	ZNF375, KIAA1748, DHHC5, DKFZp586K0524, ZDHHC5	zinc finger DHHC-type containing 5	NM_015457.2, XM_011544899.1, XM_011544900.1, XM_011544901.1		NP_056272.2
GeneID:9852	EPM2AIP1	3	36985866	36993304	7438	-	8	NDMM_1::10595, NDMM_2::9998, NDMM_3::7685, LRMM_1::12705, LRMM_2::11944, LRMM_3::8103, NDMM_4::12949, LRMM_4::12342	-264, -264, -296, 24, -264, -264, -264, -264	upstream, upstream, upstream, in gene, upstream, upstream, upstream, upstream	1	1	1	1	1	1	1	1	96	123	102	268	325	140	137	360	1	LRMM_4	360	Gene EPM2AIP1	EPM2AIP1, KIAA0766, FLJ11207	EPM2A (laforin) interacting protein 1	NM_014805.3		NP_055620.1
GeneID:4292	MLH1	3	36993350	37050846	57496	+	8	NDMM_1::10595, NDMM_2::9998, NDMM_3::7685, LRMM_1::12705, LRMM_2::11944, LRMM_3::8103, NDMM_4::12949, LRMM_4::12342	218, 218, 250, -70, 218, 218, 218, 218	in gene, in gene, in gene, upstream, in gene, in gene, in gene, in gene	1	1	1	1	1	1	1	1	96	123	102	268	325	140	137	360	1	LRMM_4	360	Gene MLH1	MLH1, hMLH1, HNPCC, HNPCC2, MGC5172, COCA2, FCC2	mutL homolog 1	NM_000249.3, NM_001167617.1, NM_001167618.1, NM_001167619.1, NM_001258271.1, NM_001258273.1, NM_001258274.1, XM_005265161.1, XM_005265163.1, XM_005265164.1, XM_005265166.1, XM_011533727.1		NP_000240.1, NP_001161089.1, NP_001161090.1, NP_001161091.1, NP_001245200.1, NP_001245202.1, NP_001245203.1, XP_005265218.1, XP_005265220.1, XP_005265221.1, XP_005265223.1
GeneID:9110	MTMR4	17	58489532	58518110	28578	-	16	NDMM_1::6815, NDMM_1::6816, NDMM_2::6271, NDMM_2::6272, NDMM_3::5051, NDMM_3::5052, LRMM_1::7849, LRMM_1::7850, LRMM_2::7633, LRMM_2::7634, LRMM_3::5158, LRMM_3::5159, NDMM_4::7949, NDMM_4::7950, LRMM_4::7831, LRMM_4::7832	13118, 62, 12894, 350, 12926, 222, 12990, 222, 12894, 318, 13086, 222, 13086, 62, 12990, 222	in gene, in gene, in gene, in gene, in gene, in gene, in gene, in gene, in gene, in gene, in gene, in gene, in gene, in gene, in gene, in gene	1	1	1	1	1	1	1	1	52	68	45	105.5	172.5	51	46.5	360	2	LRMM_4	602	Gene MTMR4	FYVE-DSP2, MTMR4, KIAA0647, ZFYVE11	myotubularin related protein 4	NM_004687.4, XM_005257784.2, XM_005257785.3, XM_011525460.1, XM_005257786.3, XM_006722168.2		NP_004678.3
GeneID:105372947	LOC105372947	22	22920012	22924966	4954	-	17	NDMM_1::10119, NDMM_1::10120, NDMM_2::9536, NDMM_2::9537, NDMM_3::7343, LRMM_1::12137, LRMM_1::12138, LRMM_1::12139, LRMM_2::11373, LRMM_2::11374, LRMM_2::11375, LRMM_3::7746, LRMM_3::7747, NDMM_4::12346, NDMM_4::12347, LRMM_4::11813, LRMM_4::11814	-3866, -7130, -3866, -7130, -3866, -3866, -7034, -10810, -3930, -7130, -10458, -3850, -7130, -3866, -7178, -3866, -7130	upstream, upstream, upstream, upstream, upstream, upstream, upstream, upstream, upstream, upstream, upstream, upstream, upstream, upstream, upstream, upstream, upstream	1	1	1	1	1	1	1	1	105.667	109.667	79.333	277	246.333	286.333	171.667	357.333	3	LRMM_4	512	Gene LOC105372947		uncharacterized LOC105372947	XR_920826.1, XR_920828.1, XR_920829.1, XR_938041.1, XR_938043.1, XR_938044.1
GeneID:105377448	LOC105377448	4	138995912	139012646	16734	-	8	NDMM_1::12069, NDMM_2::11483, NDMM_3::8765, LRMM_1::14388, LRMM_2::13861, LRMM_3::9224, NDMM_4::14655, LRMM_4::13863	-2906, -2938, -2938, -2970, -2970, -2906, -2970, -2970	upstream, upstream, upstream, upstream, upstream, upstream, upstream, upstream	1	1	1	1	1	1	1	1	118	142	145	216	177	169	152	353	1	LRMM_4	353	Gene LOC105377448		uncharacterized LOC105377448	XR_950425.1, XR_939243.1
GeneID:25819	CCRN4L	4	139015759	139045939	30180	+	9	NDMM_1::12069, NDMM_2::11483, NDMM_3::8765, LRMM_1::14388, LRMM_2::13861, LRMM_2::13862, LRMM_3::9224, NDMM_4::14655, LRMM_4::13863	-207, -175, -175, -143, -143, 12801, -207, -143, -143	upstream, upstream, upstream, upstream, upstream, in gene, upstream, upstream, upstream	1	1	1	1	1	1	1	1	118	73.5	74	112	91	104	77.5	353	2	LRMM_4	353	Gene CCRN4L	Ccr4c, MGC142054, CCR4L, CCRN4L, MGC4120817, MGC142060, NOCT, MGC78549, NOC		NM_012118.3		NP_036250.2
GeneID:101929225	MCM8-AS1	20	5990795	6005821	15026	-	8	NDMM_1::9483, NDMM_2::8876, NDMM_3::6903, LRMM_1::11202, LRMM_2::10632, LRMM_3::7212, NDMM_4::11457, LRMM_4::11101	-275, -259, -131, -259, -131, -163, -163, -163	upstream, upstream, upstream, upstream, upstream, upstream, upstream, upstream	1	1	1	1	1	1	1	1	113	136	90	144	419	216	120	345	1	LRMM_1	419	Gene MCM8-AS1	MCM8-AS1	MCM8 antisense RNA 1	NR_110101.1
GeneID:105379493	LOC105379493	21	6318421	6359726	41305	+	7	NDMM_2::9248, NDMM_3::7147, LRMM_1::11804, LRMM_2::11064, LRMM_3::7522, NDMM_4::11948, LRMM_4::11530	51115, 51883, 51851, 51851, 51915, 51659, 51691	downstream, downstream, downstream, downstream, downstream, downstream, downstream	0	1	1	1	1	1	1	1	164	123	116	363	256	272	152	337	1	NDMM_4	363	Gene LOC105379493		uncharacterized LOC105379493	XR_951111.1, XR_951112.1, XR_951113.1, XR_951114.1, XR_951115.1, XR_951116.1
GeneID:101929609	LOC101929609	1	43944370	43946757	2387	-	8	NDMM_1::416, NDMM_2::415, NDMM_3::295, LRMM_1::513, LRMM_2::471, LRMM_3::331, NDMM_4::417, LRMM_4::494	5, 5, 5, 5, 5, 37, 5, 5	in gene, in gene, in gene, in gene, in gene, in gene, in gene, in gene	1	1	1	1	1	1	1	1	130	133	101	177	310	185	125	336	1	LRMM_4	336	Gene LOC101929609		uncharacterized LOC101929609	XR_250732.2, XR_246317.2
GeneID:9403	SEP15	1	86862445	86914424	51979	-	8	NDMM_1::630, NDMM_2::646, NDMM_3::473, LRMM_1::744, LRMM_2::683, LRMM_3::504, NDMM_4::625, LRMM_4::742	120, 120, 120, 120, 120, 120, 120, 120	in gene, in gene, in gene, in gene, in gene, in gene, in gene, in gene	1	1	1	1	1	1	1	1	172	142	99	181	318	178	141	333	1	LRMM_4	333	Gene SEP15		15 kDa selenoprotein	NM_004261.3, NM_203341.1		NP_004252.2, NP_976086.1
GeneID:105379193	LOC105379193	5	138543331	138587034	43703	+	17	NDMM_1::12986, NDMM_1::12987, NDMM_2::12300, NDMM_2::12301, NDMM_3::9339, NDMM_3::9340, NDMM_3::9341, LRMM_1::15329, LRMM_1::15330, LRMM_2::14994, LRMM_2::14995, LRMM_3::9821, LRMM_3::9822, NDMM_4::15651, NDMM_4::15652, LRMM_4::14784, LRMM_4::14785	253, 32205, 381, 32221, -259, 253, 32157, 221, 32253, 253, 32189, 381, 32205, 221, 32189, 253, 32285	in gene, in gene, in gene, in gene, upstream, in gene, in gene, in gene, in gene, in gene, in gene, in gene, in gene, in gene, in gene, in gene, in gene	1	1	1	1	1	1	1	1	175.5	110.5	94	196	340	189	87.5	328	2	LRMM_4	391	Gene LOC105379193		uncharacterized LOC105379193	XR_953821.1, XR_953822.1, XR_953823.1, XR_953824.1, XR_948818.1, XR_948819.1, XR_948820.1, XR_948821.1
GeneID:126328	NDUFA11	19	5891276	5904013	12737	-	8	NDMM_1::7431, NDMM_2::6883, NDMM_3::5478, LRMM_1::8659, LRMM_2::8381, LRMM_3::5656, NDMM_4::8764, LRMM_4::8676	-499, -611, -307, -531, -307, -595, -307, -531	upstream, upstream, upstream, upstream, upstream, upstream, upstream, upstream	1	1	1	1	1	1	1	1	127	79	54	266	347	76	66	327	1	LRMM_1	347	Gene NDUFA11	B14.7, NDUFA11, FLJ76501	NADH:ubiquinone oxidoreductase subunit A11	NM_001193375.1, NM_175614.4, NR_034166.2		NP_001180304.1, NP_783313.1
GeneID:400673	VMAC	19	5904841	5910252	5411	+	8	NDMM_1::7431, NDMM_2::6883, NDMM_3::5478, LRMM_1::8659, LRMM_2::8381, LRMM_3::5656, NDMM_4::8764, LRMM_4::8676	-329, -217, -521, -297, -521, -233, -521, -297	upstream, upstream, upstream, upstream, upstream, upstream, upstream, upstream	1	1	1	1	1	1	1	1	127	79	54	266	347	76	66	327	1	LRMM_1	347	Gene VMAC	MGC131658, VMAC	vimentin-type intermediate filament associated coiled-coil protein	NM_001017921.3		NP_001017921.1
GeneID:828	CAPS	19	5913648	5916211	2563	+	8	NDMM_1::7431, NDMM_2::6883, NDMM_3::5478, LRMM_1::8659, LRMM_2::8381, LRMM_3::5656, NDMM_4::8764, LRMM_4::8676	-9136, -9024, -9328, -9104, -9328, -9040, -9328, -9104	upstream, upstream, upstream, upstream, upstream, upstream, upstream, upstream	1	1	1	1	1	1	1	1	127	79	54	266	347	76	66	327	1	LRMM_1	347	Gene CAPS	CAPS, CAPS1, MGC126562	calcyphosine	NM_004058.3, NM_080590.2, XM_005259656.1, XM_005259657.1		NP_004049.1, NP_542157.1, XP_005259713.1, XP_005259714.1
GeneID:3717	JAK2	9	4985245	5128183	142938	+	8	NDMM_1::16047, NDMM_2::15006, NDMM_3::11506, LRMM_1::19124, LRMM_2::18288, LRMM_3::11981, NDMM_4::19405, LRMM_4::17928	-605, -445, -381, -253, -381, -253, -349, -349	upstream, upstream, upstream, upstream, upstream, upstream, upstream, upstream	1	1	1	1	1	1	1	1	70	79	65	135	101	77	108	317	1	LRMM_4	317	Gene JAK2	JTK10, JAK2, THCYT3	Janus kinase 2	NM_004972.3		NP_004963.1
GeneID:11172	INSL6	9	4991949	5185710	193761	-	8	NDMM_1::16047, NDMM_2::15006, NDMM_3::11506, LRMM_1::19124, LRMM_2::18288, LRMM_3::11981, NDMM_4::19405, LRMM_4::17928	201070, 200910, 200846, 200718, 200846, 200718, 200814, 200814	downstream, downstream, downstream, downstream, downstream, downstream, downstream, downstream	1	1	1	1	1	1	1	1	70	79	65	135	101	77	108	317	1	LRMM_4	317	Gene INSL6	RIF1, INSL6	insulin like 6	NM_007179.2, XM_011517701.1, XR_929169.1, XM_011517702.1		NP_009110.2
GeneID:254170	FBXO33	14	39396373	39432500	36127	-	16	NDMM_1::4490, NDMM_1::4491, NDMM_2::4393, NDMM_2::4394, NDMM_3::3460, LRMM_1::5320, LRMM_1::5321, LRMM_2::5186, LRMM_2::5187, LRMM_3::3526, LRMM_3::3527, LRMM_3::3528, NDMM_4::5324, NDMM_4::5325, LRMM_4::5291, LRMM_4::5292	180, -284, 820, 244, 212, 180, -268, 180, -268, 868, 148, -284, 212, -332, 884, 180	in gene, upstream, in gene, in gene, in gene, in gene, upstream, in gene, upstream, in gene, in gene, upstream, in gene, upstream, in gene, in gene	1	1	1	1	1	1	1	1	210	63	111	266	242	158	88	317	1	LRMM_4	317	Gene FBXO33	Fbx33, FBXO33, c14_5247, BMND12	F-box protein 33	NM_203301.3		NP_976046.1
GeneID:1213	CLTC	17	59619689	59696956	77267	+	8	NDMM_1::6826, NDMM_2::6285, NDMM_3::5060, LRMM_1::7863, LRMM_2::7651, LRMM_3::5168, NDMM_4::7961, LRMM_4::7847	-297, -297, 55, -297, -297, -297, -265, -297	upstream, upstream, in gene, upstream, upstream, upstream, upstream, upstream	1	1	1	1	1	1	1	1	69	68	36	102	259	69	45	314	1	LRMM_4	314	Gene CLTC	KIAA0034, Hc, CLTCL2, CHC17, CHC, CLTC, CLH-17	clathrin heavy chain	NM_004859.3, NM_001288653.1, XM_005257012.2, XM_011524279.1, XM_011524280.1, XM_011524281.1		NP_004850.1, NP_001275582.1
GeneID:140901	STK35	20	2099799	2148555	48756	+	8	NDMM_1::9444, NDMM_2::8845, NDMM_3::6872, LRMM_1::11150, LRMM_2::10599, LRMM_3::7188, NDMM_4::11420, LRMM_4::11061	2473, 2441, 2409, 2409, 2441, 2409, 2409, 2409	in gene, in gene, in gene, in gene, in gene, in gene, in gene, in gene	1	1	1	1	1	1	1	1	111	125	67	172	375	171	165	310	1	LRMM_1	375	Gene STK35	STK35, STK35L1, CLIK1	serine/threonine kinase 35	NM_080836.3, XM_011529174.1		NP_543026.2
GeneID:102465835	MIR7845	2	207166400	207166498	98	+	8	NDMM_1::9250, NDMM_2::8639, NDMM_3::6722, LRMM_1::10896, LRMM_2::10358, LRMM_3::7035, NDMM_4::11158, LRMM_4::10835	0, -64, -64, 0, 0, -64, -64, -64	in gene, upstream, upstream, in gene, in gene, upstream, upstream, upstream	1	1	1	1	1	1	1	1	160	95	72	168	283	148	99	310	1	LRMM_4	310	Gene MIR7845	MIR7845, hsa-mir-7845	microRNA 7845
GeneID:58505	OSTC	4	108650585	108667822	17237	+	8	NDMM_1::11996, NDMM_2::11384, NDMM_3::8700, LRMM_1::14292, LRMM_2::13705, LRMM_3::9157, NDMM_4::14533, LRMM_4::13784	-89, -89, -89, -89, -89, -89, -89, -89	upstream, upstream, upstream, upstream, upstream, upstream, upstream, upstream	1	1	1	1	1	1	1	1	154	183	139	209	265	289	173	305	1	LRMM_4	305	Gene OSTC	OSTC, DC2	oligosaccharyltransferase complex subunit (non-catalytic)	NM_001267818.1, NM_021227.3, NM_001267817.1		NP_001254747.1, NP_067050.1, NP_001254746.1
GeneID:100506012	PPP5D1	19	46480788	46601200	120412	-	8	NDMM_1::7964, NDMM_2::7352, NDMM_3::5754, LRMM_1::9285, LRMM_2::8856, LRMM_3::5992, NDMM_4::9453, LRMM_4::9317	336, 368, 336, 336, 336, 336, 336, 336	in gene, in gene, in gene, in gene, in gene, in gene, in gene, in gene	1	1	1	1	1	1	1	1	163	113	56	209	220	146	74	300	1	LRMM_4	300	Gene PPP5D1	PPP5D1	PPP5 tetratricopeptide repeat domain containing 1	NM_001205281.1, XM_005258397.2, XM_006722960.2		NP_001192210.1
GeneID:102724041	LOC102724041	1	231461477	231520998	59521	-	8	NDMM_1::1480, NDMM_2::1510, NDMM_3::1170, LRMM_1::2003, LRMM_2::1868, LRMM_3::1356, NDMM_4::1735, LRMM_4::1947	-7498, -7498, -7482, -7482, -7450, -7482, -7466, -7450	upstream, upstream, upstream, upstream, upstream, upstream, upstream, upstream	1	1	1	1	1	1	1	1	98	74	46	226	342	69	63	298	1	LRMM_1	342	Gene LOC102724041		uncharacterized LOC102724041	XR_431372.2, XR_921309.1, XR_426939.2, XR_949267.1
GeneID:7257	TSNAX	1	231528653	231566524	37871	+	8	NDMM_1::1480, NDMM_2::1510, NDMM_3::1170, LRMM_1::2003, LRMM_2::1868, LRMM_3::1356, NDMM_4::1735, LRMM_4::1947	-157, -157, -173, -173, -205, -173, -189, -205	upstream, upstream, upstream, upstream, upstream, upstream, upstream, upstream	1	1	1	1	1	1	1	1	98	74	46	226	342	69	63	298	1	LRMM_1	342	Gene TSNAX	TRAX, DISC1, TSNAX	translin-associated factor X	NM_005999.2		NP_005990.1
GeneID:6827	SUPT4H1	17	58345175	58352238	7063	-	25	NDMM_1::6811, NDMM_1::6812, NDMM_1::6813, NDMM_2::6267, NDMM_2::6268, NDMM_2::6269, NDMM_3::5048, NDMM_3::5049, NDMM_3::5050, LRMM_1::7845, LRMM_1::7846, LRMM_2::7627, LRMM_2::7628, LRMM_2::7629, LRMM_2::7630, LRMM_3::5156, LRMM_3::5157, NDMM_4::7944, NDMM_4::7945, NDMM_4::7946, NDMM_4::7947, LRMM_4::7824, LRMM_4::7825, LRMM_4::7826, LRMM_4::7827	14254, 7790, -82, 14222, 7774, -210, 14222, 7790, -210, 14222, -146, 16142, 14350, 7790, -210, 7790, -242, 16142, 14190, 7790, -178, 16142, 14190, 7790, -146	downstream, downstream, upstream, downstream, downstream, upstream, downstream, downstream, upstream, downstream, upstream, downstream, downstream, downstream, upstream, downstream, upstream, downstream, downstream, downstream, upstream, downstream, downstream, downstream, upstream	1	1	1	1	1	1	1	1	49.5	53.25	39.5	96.5	94.75	98.5	27.5	295.5	4	LRMM_4	462	Gene SUPT4H1	Supt4a, SUPT4H, SPT4H, SUPT4H1, SPT4	SPT4 homolog, DSIF elongation factor subunit	NM_003168.2, NR_073470.1		NP_003159.1
GeneID:10456	HAX1	1	154272563	154275875	3312	+	8	NDMM_1::965, NDMM_2::952, NDMM_3::745, LRMM_1::1124, LRMM_2::1090, LRMM_3::808, NDMM_4::980, LRMM_4::1173	-51, -51, -115, -83, 45, -51, -51, -51	upstream, upstream, upstream, upstream, in gene, upstream, upstream, upstream	1	1	1	1	1	1	1	1	77	96	58	160	267	135	84	291	1	LRMM_4	291	Gene HAX1	SCN3, HCLSBP1, HS1BP1, FLJ17042, FLJ93803, FLJ18492, HAX1	HCLS1 associated protein X-1	NM_006118.3, NM_001018837.1		NP_006109.2, NP_001018238.1
GeneID:593	BCKDHA	19	41397789	41425005	27216	+	8	NDMM_1::7870, NDMM_2::7268, NDMM_3::5699, LRMM_1::9191, LRMM_2::8779, LRMM_3::5923, NDMM_4::9343, LRMM_4::9193	-189, -189, -189, -189, -189, -189, -189, -189	upstream, upstream, upstream, upstream, upstream, upstream, upstream, upstream	1	1	1	1	1	1	1	1	153	114	59	160	269	102	104	290	1	LRMM_4	290	Gene BCKDHA	FLJ45695, MSUD1, BCKDE1A, MSU, BCKDHA, OVD1A	branched chain keto acid dehydrogenase E1, alpha polypeptide	NM_000709.3, NM_001164783.1		NP_000700.1, NP_001158255.1
GeneID:6144	RPL21	13	27251555	27256568	5013	+	8	NDMM_1::4027, NDMM_2::4110, NDMM_3::3097, LRMM_1::4865, LRMM_2::4770, LRMM_3::3294, NDMM_4::4876, LRMM_4::4834	-131, 13, -35, -131, -131, -131, -131, -131	upstream, in gene, upstream, upstream, upstream, upstream, upstream, upstream	1	1	1	1	1	1	1	1	133	69	110	135	231	87	77	288	1	LRMM_4	288	Gene RPL21	FLJ27458, L21, DKFZp686C06101, MGC71252, MGC104274, RPL21, HYPT12, MGC104275	ribosomal protein L21	NM_000982.3		NP_000973.2
GeneID:26771	SNORD102	13	27255064	27255135	71	+	8	NDMM_1::4027, NDMM_2::4110, NDMM_3::3097, LRMM_1::4865, LRMM_2::4770, LRMM_3::3294, NDMM_4::4876, LRMM_4::4834	-3640, -3496, -3544, -3640, -3640, -3640, -3640, -3640	upstream, upstream, upstream, upstream, upstream, upstream, upstream, upstream	1	1	1	1	1	1	1	1	133	69	110	135	231	87	77	288	1	LRMM_4	288	Gene SNORD102	Z18, SNORD102, RNU102	small nucleolar RNA, C/D box 102	NR_002574.1
GeneID:619499	SNORA27	13	27255401	27255526	125	+	8	NDMM_1::4027, NDMM_2::4110, NDMM_3::3097, LRMM_1::4865, LRMM_2::4770, LRMM_3::3294, NDMM_4::4876, LRMM_4::4834	-3977, -3833, -3881, -3977, -3977, -3977, -3977, -3977	upstream, upstream, upstream, upstream, upstream, upstream, upstream, upstream	1	1	1	1	1	1	1	1	133	69	110	135	231	87	77	288	1	LRMM_4	288	Gene SNORA27	SNORA27, ACA27	small nucleolar RNA, H/ACA box 27	NR_002575.1
GeneID:7251	TSG101	11	18480311	18526956	46645	-	8	NDMM_1::2392, NDMM_2::2429, NDMM_3::1918, LRMM_1::3038, LRMM_2::2974, LRMM_3::2000, NDMM_4::2863, LRMM_4::2935	140, 140, 140, 140, -20, 140, 140, 140	in gene, in gene, in gene, in gene, upstream, in gene, in gene, in gene	1	1	1	1	1	1	1	1	137	92	84	171	175	92	60	286	1	LRMM_4	286	Gene TSG101	TSG101, VPS23, TSG10	tumor susceptibility 101	NM_006292.3, XM_005253108.2		NP_006283.1
GeneID:11168	PSIP1	9	15464066	15511005	46939	-	8	NDMM_1::16075, NDMM_2::15038, NDMM_3::11529, LRMM_1::19162, LRMM_2::18320, LRMM_3::12003, NDMM_4::19441, LRMM_4::17971	-115, -131, -131, -67, -163, -35, -131, -131	upstream, upstream, upstream, upstream, upstream, upstream, upstream, upstream	1	1	1	1	1	1	1	1	94	76	43	114	141	94	66	285	1	LRMM_4	285	Gene PSIP1	LEDGF, PAIP, PSIP2, p52, MGC74712, PSIP1, p75, DFS70	PC4 and SFRS1 interacting protein 1	NM_033222.3, NM_021144.3, NM_001128217.1, XM_005251358.1, XM_011517697.1, XM_011517698.1, XM_011517699.1, XM_011517700.1		NP_150091.2, NP_066967.3, NP_001121689.1, XP_005251415.1
GeneID:105369291	LOC105369291	9	15502172	15510091	7919	+	8	NDMM_1::16075, NDMM_2::15038, NDMM_3::11529, LRMM_1::19162, LRMM_2::18320, LRMM_3::12003, NDMM_4::19441, LRMM_4::17971	8948, 8964, 8964, 8900, 8996, 8868, 8964, 8964	downstream, downstream, downstream, downstream, downstream, downstream, downstream, downstream	1	1	1	1	1	1	1	1	94	76	43	114	141	94	66	285	1	LRMM_4	285	Gene LOC105369291		uncharacterized LOC105369291	XR_957902.1, XR_929495.1
GeneID:101927993	LOC101927993	9	93091406	93095543	4137	-	11	NDMM_1::16357, NDMM_2::15286, NDMM_3::11708, LRMM_1::19543, LRMM_2::18587, LRMM_2::18588, LRMM_3::12212, LRMM_3::12213, NDMM_4::19774, NDMM_4::19775, LRMM_4::18312	55, 23, -73, 23, 55, -649, 55, -761, 55, -489, 55	in gene, in gene, upstream, in gene, in gene, upstream, in gene, upstream, in gene, upstream, in gene	1	1	1	1	1	1	1	1	143	76	54	237	246	74	53	285	1	LRMM_4	285	Gene LOC101927993		uncharacterized LOC101927993	XR_958607.1, XR_432469.2, XR_958608.1, XR_958609.1, XR_930126.1, XR_242645.3, XR_930127.1, XR_930128.1
GeneID:8318	CDC45	22	19479385	19520612	41227	+	8	NDMM_1::10082, NDMM_2::9490, NDMM_3::7314, LRMM_1::12080, LRMM_2::11330, LRMM_3::7713, NDMM_4::12260, LRMM_4::11745	167, 199, 199, 199, 199, 199, 199, 199	in gene, in gene, in gene, in gene, in gene, in gene, in gene, in gene	1	1	1	1	1	1	1	1	133	133	117	279	220	149	129	282	1	LRMM_4	282	Gene CDC45	CDC45L2, CDC45L, PORC-PI-1, CDC45	cell division cycle 45	NM_001178010.2, NM_001178011.2, NM_003504.4, XM_005261285.2, XM_005261286.3, XM_011530415.1, XM_011530416.1, XM_011530417.1, XM_011530418.1, XR_937930.1, XM_011530419.1		NP_001171481.1, NP_001171482.1, NP_003495.1, XP_005261342.1
GeneID:10056	FARSB	2	222571443	222656355	84912	-	8	NDMM_1::9310, NDMM_2::8706, NDMM_3::6773, LRMM_1::10978, LRMM_2::10436, LRMM_3::7086, NDMM_4::11255, LRMM_4::10915	163, 195, 163, 163, 163, 163, 163, 163	in gene, in gene, in gene, in gene, in gene, in gene, in gene, in gene	1	1	1	1	1	1	1	1	148	116	105	201	341	108	128	281	1	LRMM_1	341	Gene FARSB	HSPC173, PheRS, FARSB, PheHB, FARSLB, FRSB		XM_006712169.1, XM_006712170.1, NM_005687.4, NR_130154.1, XM_011510466.1		XP_006712232.1, XP_006712233.1, NP_005678.3
GeneID:105373902	LOC105373902	2	222644912	222650900	5988	+	8	NDMM_1::9310, NDMM_2::8706, NDMM_3::6773, LRMM_1::10978, LRMM_2::10436, LRMM_3::7086, NDMM_4::11255, LRMM_4::10915	11280, 11248, 11280, 11280, 11280, 11280, 11280, 11280	downstream, downstream, downstream, downstream, downstream, downstream, downstream, downstream	1	1	1	1	1	1	1	1	148	116	105	201	341	108	128	281	1	LRMM_1	341	Gene LOC105373902		uncharacterized LOC105373902	XR_933498.1, XR_923947.1
GeneID:105370524	LOC105370524	14	59969150	60091780	122630	-	8	NDMM_1::4613, NDMM_2::4464, NDMM_3::3554, LRMM_1::5432, LRMM_2::5322, LRMM_3::3598, NDMM_4::5435, LRMM_4::5399	-284, -284, -284, -284, -284, -284, -284, -284	upstream, upstream, upstream, upstream, upstream, upstream, upstream, upstream	1	1	1	1	1	1	1	1	147	70	101	240	239	171	106	280	1	LRMM_4	280	Gene LOC105370524		uncharacterized LOC105370524	XR_915673.1, XR_915674.1, XR_915675.1, XR_915676.1, XR_943916.1, XR_943917.1, XR_943918.1, XR_943919.1
GeneID:64430	PCNXL4	14	60091827	60134814	42987	+	8	NDMM_1::4613, NDMM_2::4464, NDMM_3::3554, LRMM_1::5432, LRMM_2::5322, LRMM_3::3598, NDMM_4::5435, LRMM_4::5399	237, 237, 237, 237, 237, 237, 237, 237	in gene, in gene, in gene, in gene, in gene, in gene, in gene, in gene	1	1	1	1	1	1	1	1	147	70	101	240	239	171	106	280	1	LRMM_4	280	Gene PCNXL4	FLJ38170, FBP2, FLJ12799, C14orf135, PCNXL4, PCNX4	pecanex homolog 4 (Drosophila)	NM_022495.5, XM_005268009.1, XR_943508.1, XR_943509.1		NP_071940.4, XP_005268066.1
GeneID:10654	PMVK	1	154924732	154937310	12578	-	16	NDMM_1::974, NDMM_1::975, NDMM_2::966, NDMM_2::967, NDMM_3::756, NDMM_3::757, LRMM_1::1145, LRMM_1::1146, LRMM_2::1116, LRMM_2::1117, LRMM_3::817, LRMM_3::818, NDMM_4::1000, NDMM_4::1001, LRMM_4::1197, LRMM_4::1198	190, -5442, 190, -5154, 158, -5314, 190, -5154, 254, -5506, 222, -5346, 190, -5250, 190, -5154	in gene, upstream, in gene, upstream, in gene, upstream, in gene, upstream, in gene, upstream, in gene, upstream, in gene, upstream, in gene, upstream	1	1	1	1	1	1	1	1	106.5	121	69	214	347.5	183.5	103.5	279.5	2	LRMM_1	559	Gene PMVK	PMVK, HUMPMKI, PMKA, PMKASE, PMK, POROK1	phosphomevalonate kinase	NM_006556.3, XM_011509084.1, XM_011509085.1		NP_006547.1
GeneID:105376019	LOC105376019	9	33290610	33294413	3803	+	16	NDMM_1::16159, NDMM_1::16160, NDMM_2::15096, NDMM_2::15097, NDMM_3::11572, NDMM_3::11573, LRMM_1::19257, LRMM_1::19258, LRMM_2::18392, LRMM_2::18393, LRMM_3::12062, LRMM_3::12063, NDMM_4::19529, NDMM_4::19530, LRMM_4::18073, LRMM_4::18074	-82, 7118, -82, 7043, 78, 7022, -82, 7022, 302, 7118, -82, 6990, -50, 7086, -82, 7022	upstream, downstream, upstream, downstream, in gene, downstream, upstream, downstream, in gene, downstream, upstream, downstream, upstream, downstream, upstream, downstream	1	1	1	1	1	1	1	1	102	68	49.5	124	234.5	37.5	65.5	277.5	2	LRMM_1	321	Gene LOC105376019		uncharacterized LOC105376019	XR_957977.1, XR_929562.1
GeneID:105369403	LOC105369403	11	78473146	78497594	24448	+	8	NDMM_1::2859, NDMM_2::2837, NDMM_3::2215, LRMM_1::3582, LRMM_2::3430, LRMM_3::2313, NDMM_4::3374, LRMM_4::3466	-7642, -7770, -7770, -7770, -8058, -7770, -7770, -7770	upstream, upstream, upstream, upstream, upstream, upstream, upstream, upstream	1	1	1	1	1	1	1	1	118	148	71	163	211	99	122	277	1	LRMM_4	277	Gene LOC105369403		uncharacterized LOC105369403	XR_913337.1, XR_913338.1, XR_950344.1, XR_950345.1
GeneID:57147	SCYL3	1	169853074	169894267	41193	-	8	NDMM_1::1133, NDMM_2::1137, NDMM_3::880, LRMM_1::1414, LRMM_2::1364, LRMM_3::988, NDMM_4::1222, LRMM_4::1431	91, 91, 347, 91, 91, 91, 411, 91	in gene, in gene, in gene, in gene, in gene, in gene, in gene, in gene	1	1	1	1	1	1	1	1	95	98	72	187	287	226	107	277	1	LRMM_1	287	Gene SCYL3	PACE-1, SCYL3, PACE1, RP1-97P20.2	SCY1 like pseudokinase 3	NM_020423.6, NM_181093.3, XM_006711465.1, XM_011509801.1, XM_011509802.1, XM_011509803.1, XM_006711467.2		NP_065156.5, NP_851607.2, XP_006711528.1
GeneID:348235	SKA2	17	59109947	59155439	45492	-	18	NDMM_1::6821, NDMM_1::6822, NDMM_2::6277, NDMM_2::6278, NDMM_3::5055, NDMM_3::5056, NDMM_3::5057, LRMM_1::7856, LRMM_1::7857, LRMM_2::7641, LRMM_2::7642, LRMM_3::5162, LRMM_3::5163, LRMM_3::5164, NDMM_4::7954, NDMM_4::7955, LRMM_4::7838, LRMM_4::7839	48943, -49, 48415, -49, 48943, 48559, -49, 48431, -49, 48431, 15, 49135, 48623, -49, 48431, -49, 48495, -49	downstream, upstream, downstream, upstream, downstream, downstream, upstream, downstream, upstream, downstream, in gene, downstream, downstream, upstream, downstream, upstream, downstream, upstream	1	1	1	1	1	1	1	1	39.5	39.5	34	88	110.5	51.5	24.5	275.5	2	LRMM_4	288	Gene SKA2	MGC110975, FLJ12758, FAM33A, SKA2	spindle and kinetochore associated complex subunit 2	NM_182620.3, NM_001100595.1, XM_011524745.1		NP_872426.1, NP_001094065.1
GeneID:105379494	LOC105379494	21	6374075	6376537	2462	-	19	NDMM_1::9855, NDMM_1::9856, NDMM_1::9857, NDMM_2::9248, NDMM_2::9249, NDMM_2::9250, NDMM_2::9251, NDMM_3::7147, LRMM_1::11804, LRMM_1::11805, LRMM_2::11064, LRMM_2::11065, LRMM_3::7522, LRMM_3::7523, NDMM_4::11948, NDMM_4::11949, LRMM_4::11530, LRMM_4::11531, LRMM_4::11532	6265, 5113, 4249, 7001, 6249, 4921, 4121, 6233, 6265, 5065, 6265, 4281, 6201, 4249, 6457, 4281, 6425, 5113, 4281	downstream, downstream, downstream, downstream, downstream, downstream, downstream, downstream, downstream, downstream, downstream, downstream, downstream, downstream, downstream, downstream, downstream, downstream, downstream	1	1	1	1	1	1	1	1	126.5	108	89.5	273.5	176	227	119.5	272.5	2	NDMM_4	363	Gene LOC105379494		uncharacterized LOC105379494	XR_951118.1
GeneID:9343	EFTUD2	17	44850287	44899625	49338	-	8	NDMM_1::6686, NDMM_2::6151, NDMM_3::4976, LRMM_1::7674, LRMM_2::7472, LRMM_3::5069, NDMM_4::7801, LRMM_4::7650	73, 73, 41, 73, 9, 73, 9, 73	in gene, in gene, in gene, in gene, in gene, in gene, in gene, in gene	1	1	1	1	1	1	1	1	84	89	56	139	239	112	76	272	1	LRMM_4	272	Gene EFTUD2	Snrp116, EFTUD2, U5-116KD, FLJ44695, SNRNP116, KIAA0031, Snu114, MFDGA, DKFZp686E24196, MFDM	elongation factor Tu GTP binding domain containing 2	NM_004247.3, NM_001142605.1, NM_001258353.1, NM_001258354.1, XR_934602.1		NP_004238.3, NP_001136077.1, NP_001245282.1, NP_001245283.1
GeneID:388389	CCDC103	17	44899712	44903679	3967	+	8	NDMM_1::6686, NDMM_2::6151, NDMM_3::4976, LRMM_1::7674, LRMM_2::7472, LRMM_3::5069, NDMM_4::7801, LRMM_4::7650	-160, -160, -128, -160, -96, -160, -96, -160	upstream, upstream, upstream, upstream, upstream, upstream, upstream, upstream	1	1	1	1	1	1	1	1	84	89	56	139	239	112	76	272	1	LRMM_4	272	Gene CCDC103	PR46b, FLJ34211, CCDC103, FLJ13094, SMH, CILD17	coiled-coil domain containing 103	NM_001258395.1, NM_001258396.1, NM_001258397.1, NM_001258398.1, NM_001258399.1, NM_213607.2		NP_001245324.1, NP_001245325.1, NP_001245326.1, NP_001245327.1, NP_001245328.1, NP_998772.1
GeneID:2670	GFAP	17	44905626	44915552	9926	-	8	NDMM_1::6686, NDMM_2::6151, NDMM_3::4976, LRMM_1::7674, LRMM_2::7472, LRMM_3::5069, NDMM_4::7801, LRMM_4::7650	16000, 16000, 15968, 16000, 15936, 16000, 15936, 16000	downstream, downstream, downstream, downstream, downstream, downstream, downstream, downstream	1	1	1	1	1	1	1	1	84	89	56	139	239	112	76	272	1	LRMM_4	272	Gene GFAP	FLJ42474, GFAP, ALXDRD, FLJ45472	glial fibrillary acidic protein	NM_001131019.2, NM_002055.4, NM_001242376.1		NP_001124491.1, NP_002046.1, NP_001229305.1
GeneID:26870	RNU1-2	1	16895980	16896143	163	+	18	NDMM_1::142, NDMM_1::143, NDMM_1::144, NDMM_2::133, NDMM_2::134, NDMM_2::135, NDMM_3::90, NDMM_3::91, LRMM_1::162, LRMM_1::163, LRMM_2::162, LRMM_2::163, LRMM_3::108, LRMM_3::109, NDMM_4::137, NDMM_4::138, LRMM_4::153, LRMM_4::154	116, 548, 9076, 244, 820, 9076, 84, 9044, 244, 9012, 116, 9076, 116, 9076, 532, 9012, 116, 9076	in gene, downstream, downstream, downstream, downstream, downstream, in gene, downstream, downstream, downstream, in gene, downstream, in gene, downstream, downstream, downstream, in gene, downstream	1	1	1	1	1	1	1	1	172	143	83.5	116.5	274	138.5	181	271	2	LRMM_1	453	Gene RNU1-2	RNU1C2, U1C21, U1C1, RNU1C1, RNU1-2	RNA, U1 small nuclear 2	NR_004427.1
GeneID:101929351	CDC37L1-AS1	9	4676600	4679480	2880	-	8	NDMM_1::16038, NDMM_2::14996, NDMM_3::11499, LRMM_1::19118, LRMM_2::18281, LRMM_3::11971, NDMM_4::19397, LRMM_4::17919	-232, -296, -232, -232, -232, -232, -232, -232	upstream, upstream, upstream, upstream, upstream, upstream, upstream, upstream	1	1	1	1	1	1	1	1	98	57	41	107	233	71	71	271	1	LRMM_4	271	Gene CDC37L1-AS1	CDC37L1-AS1	CDC37L1 antisense RNA 1 (head to head)	NR_121598.1, NR_121597.1
GeneID:51144	HSD17B12	11	43680593	43856619	176026	+	8	NDMM_1::2490, NDMM_2::2516, NDMM_3::1977, LRMM_1::3144, LRMM_2::3069, LRMM_3::2053, NDMM_4::2974, LRMM_4::3023	271, 271, 271, 271, 303, 191, 111, 271	in gene, in gene, in gene, in gene, in gene, in gene, in gene, in gene	1	1	1	1	1	1	1	1	101	98	66	151	310	88	61	268	1	LRMM_1	310	Gene HSD17B12	KAR, HSD17B12, SDR12C1	hydroxysteroid (17-beta) dehydrogenase 12	NM_016142.2, XM_011520156.1		NP_057226.1
GeneID:54888	NSUN2	5	6599239	6633360	34121	-	8	NDMM_1::12304, NDMM_2::11713, NDMM_3::8928, LRMM_1::14627, LRMM_2::14178, LRMM_3::9401, NDMM_4::14954, LRMM_4::14121	144, 144, 80, 144, 144, 144, 192, 144	in gene, in gene, in gene, in gene, in gene, in gene, in gene, in gene	1	1	1	1	1	1	1	1	109	77	54	107	183	181	110	267	1	LRMM_4	267	Gene NSUN2	MISU, FLJ20303, SAKI, NSUN2, TRM4, MRT5	NOP2/Sun RNA methyltransferase family member 2	NM_017755.5, NM_001193455.1, NR_037947.1		NP_060225.4, NP_001180384.1
GeneID:2107	ETF1	5	138506093	138543300	37207	-	9	NDMM_1::12986, NDMM_2::12300, NDMM_3::9339, NDMM_3::9340, LRMM_1::15329, LRMM_2::14994, LRMM_3::9821, NDMM_4::15651, LRMM_4::14784	-284, -412, 228, -284, -252, -284, -412, -252, -284	upstream, upstream, in gene, upstream, upstream, upstream, upstream, upstream, upstream	1	1	1	1	1	1	1	1	154	111	96	173	294	198	93	265	1	LRMM_1	294	Gene ETF1	MGC111066, ETF1, D5S1995, ERF1, TB3-1, SUP45L1, ERF, RF1	eukaryotic translation termination factor 1	NM_004730.3, XM_005271921.1, NM_001282185.1, NM_001256302.1, NM_001291974.1, NM_001291975.1		NP_004721.1, XP_005271978.1, NP_001269114.1, NP_001243231.1, NP_001278903.1, NP_001278904.1
GeneID:54987	C1orf123	1	53214099	53220639	6540	-	8	NDMM_1::489, NDMM_2::492, NDMM_3::350, LRMM_1::606, LRMM_2::538, LRMM_3::400, NDMM_4::488, LRMM_4::598	159, 159, 159, 159, 127, 159, 127, 159	in gene, in gene, in gene, in gene, in gene, in gene, in gene, in gene	1	1	1	1	1	1	1	1	109	85	42	97	207	40	70	265	1	LRMM_4	265	Gene C1orf123	C1orf123, FLJ20580	chromosome 1 open reading frame 123	NM_001304759.1, NM_017887.2, NM_001304760.1, NR_130897.1		NP_001291688.1, NP_060357.1, NP_001291689.1
GeneID:113746	ODF3	11	196641	200258	3617	+	10	NDMM_1::2248, NDMM_2::2304, NDMM_3::1820, LRMM_1::2837, LRMM_1::2838, LRMM_2::2822, LRMM_3::1894, NDMM_4::2667, LRMM_4::2774, LRMM_4::2775	10879, 10879, 10879, -6721, 10879, 10879, 10943, 10879, -6689, 10879	downstream, downstream, downstream, upstream, downstream, downstream, downstream, downstream, upstream, downstream	1	1	1	1	1	1	1	1	102	73	51.5	136.5	266	95.5	61.5	263	2	LRMM_4	505	Gene ODF3	hSHIPPO, SHIPPO1, CT135, ODF3, TISP50	outer dense fiber of sperm tails 3	NM_001286136.1, NM_053280.4, XM_011519872.1		NP_001273065.1, NP_444510.2
GeneID:407027	MIR301A	17	59151136	59151221	85	-	8	NDMM_1::6822, NDMM_2::6278, NDMM_3::5057, LRMM_1::7857, LRMM_2::7642, LRMM_3::5164, NDMM_4::7955, LRMM_4::7839	-4267, -4267, -4267, -4267, -4203, -4267, -4267, -4267	upstream, upstream, upstream, upstream, upstream, upstream, upstream, upstream	1	1	1	1	1	1	1	1	45	42	28	95	102	39	22	263	1	LRMM_4	263	Gene MIR301A	MIR301A, MIR301, MIRN301, MIRN301A, mir-301a	microRNA 301a
GeneID:1738	DLD	7	107891107	107921198	30091	+	8	NDMM_1::15067, NDMM_2::14032, NDMM_3::10757, LRMM_1::17651, LRMM_2::17200, LRMM_3::11295, NDMM_4::18039, LRMM_4::16878	125, 125, 125, 125, 125, 125, 125, 125	in gene, in gene, in gene, in gene, in gene, in gene, in gene, in gene	1	1	1	1	1	1	1	1	165	145	97	186	292	142	82	252	1	LRMM_1	292	Gene DLD	E3, PHE3, LAD, DLDH, GCSL, DLD, DLDD	dihydrolipoamide dehydrogenase	NM_000108.4, NM_001289750.1, NM_001289751.1, NM_001289752.1		NP_000099.2, NP_001276679.1, NP_001276680.1, NP_001276681.1
GeneID:158055	C9orf163	9	136483495	136486067	2572	+	12	NDMM_1::16713, NDMM_2::15579, NDMM_2::15580, NDMM_3::11929, LRMM_1::20005, LRMM_1::20006, LRMM_2::18969, LRMM_3::12448, LRMM_3::12449, NDMM_4::20242, LRMM_4::18710, LRMM_4::18711	185, -679, 185, -679, -487, 185, 169, -679, 185, 185, -487, 185	in gene, upstream, in gene, upstream, upstream, in gene, in gene, upstream, in gene, in gene, upstream, in gene	1	1	1	1	1	1	1	1	70	57	23	145	342	50	53	249	1	LRMM_1	342	Gene C9orf163	RP11-413M3.11, FLJ36779, C9orf163	chromosome 9 open reading frame 163	NM_152571.2		NP_689784.1
GeneID:105375447	LOC105375447	7	108554543	108561807	7264	-	9	NDMM_1::15071, NDMM_2::14037, NDMM_3::10761, LRMM_1::17653, LRMM_2::17205, LRMM_3::11297, NDMM_4::18045, LRMM_4::16880, LRMM_4::16881	-8145, -8145, -7953, -8145, -8145, -8145, -7953, -7953, -8721	upstream, upstream, upstream, upstream, upstream, upstream, upstream, upstream, upstream	1	1	1	1	1	1	1	1	171	111	103	169	317	105	96	248	1	LRMM_1	317	Gene LOC105375447		uncharacterized LOC105375447	XR_956047.1, XR_927854.1
GeneID:168451	THAP5	7	108562144	108569768	7624	-	9	NDMM_1::15071, NDMM_2::14037, NDMM_3::10761, LRMM_1::17653, LRMM_2::17205, LRMM_3::11297, NDMM_4::18045, LRMM_4::16880, LRMM_4::16881	-184, -184, 8, -184, -184, -184, 8, 8, -760	upstream, upstream, in gene, upstream, upstream, upstream, in gene, in gene, upstream	1	1	1	1	1	1	1	1	171	111	103	169	317	105	96	248	1	LRMM_1	317	Gene THAP5	DKFZp313O1132, THAP5	THAP domain containing 5	NM_001287598.1, NM_182529.3, NM_001130475.2, NM_001287601.1, NM_001287599.1		NP_001274527.1, NP_872335.2, NP_001123947.1, NP_001274530.1, NP_001274528.1
GeneID:4189	DNAJB9	7	108569745	108574850	5105	+	9	NDMM_1::15071, NDMM_2::14037, NDMM_3::10761, LRMM_1::17653, LRMM_2::17205, LRMM_3::11297, NDMM_4::18045, LRMM_4::16880, LRMM_4::16881	207, 207, 15, 207, 207, 207, 15, 15, 783	in gene, in gene, in gene, in gene, in gene, in gene, in gene, in gene, in gene	1	1	1	1	1	1	1	1	171	111	103	169	317	105	96	248	1	LRMM_1	317	Gene DNAJB9	MST049, MSTP049, ERdj4, DNAJB9, DKFZp564F1862, MDG1, MDG-1	DnaJ heat shock protein family (Hsp40) member B9	NM_012328.2		NP_036460.1
GeneID:105375448	LOC105375448	7	108577418	108614273	36855	+	9	NDMM_1::15071, NDMM_2::14037, NDMM_3::10761, LRMM_1::17653, LRMM_2::17205, LRMM_3::11297, NDMM_4::18045, LRMM_4::16880, LRMM_4::16881	-7466, -7466, -7658, -7466, -7466, -7466, -7658, -7658, -6890	upstream, upstream, upstream, upstream, upstream, upstream, upstream, upstream, upstream	1	1	1	1	1	1	1	1	171	111	103	169	317	105	96	248	1	LRMM_1	317	Gene LOC105375448		uncharacterized LOC105375448	XR_956048.1, XR_956049.1, XR_956050.1, XR_956051.1, XR_956052.1, XR_956053.1, XR_927855.1, XR_927856.1, XR_927857.1, XR_927858.1, XR_927859.1, XR_927860.1
GeneID:2987	GUK1	1	228139643	228148955	9312	+	8	NDMM_1::1454, NDMM_2::1485, NDMM_3::1152, LRMM_1::1952, LRMM_2::1850, LRMM_3::1334, NDMM_4::1695, LRMM_4::1919	501, 421, 389, 485, 405, 453, 485, 389	in gene, in gene, in gene, in gene, in gene, in gene, in gene, in gene	1	1	1	1	1	1	1	1	66	85	47	206	251	36	58	248	1	LRMM_1	251	Gene GUK1	FLJ42686, GMK, FLJ43710, GUK1	guanylate kinase 1	NM_000858.5, NM_001159390.1, NM_001159391.1, NM_001242839.1, NM_001242840.1, XM_005273105.2, XM_005273103.3, XM_005273104.3, XM_005273106.2, XM_011544174.1		NP_000849.1, NP_001152862.1, NP_001152863.1, NP_001229768.1, NP_001229769.1, XP_005273162.1
GeneID:339210	C17orf67	17	56791913	56834062	42149	-	15	NDMM_1::6781, NDMM_1::6782, NDMM_1::6783, NDMM_1::6784, NDMM_2::6246, NDMM_2::6247, NDMM_3::5037, NDMM_3::5038, NDMM_3::5039, LRMM_1::7822, LRMM_2::7586, LRMM_2::7587, LRMM_3::5134, NDMM_4::7915, LRMM_4::7782	814, 254, -82, -658, 334, -82, 750, 334, -82, 334, -50, -594, 302, -82, -82	in gene, in gene, upstream, upstream, in gene, upstream, in gene, in gene, upstream, in gene, upstream, upstream, in gene, upstream, upstream	1	1	1	1	1	1	1	1	39	44	35	59	108	64	26	248	1	LRMM_4	248	Gene C17orf67	C17orf67	chromosome 17 open reading frame 67	NM_001085430.2, XM_011524733.1, XM_011524734.1, XM_011524735.1, XM_011524736.1		NP_001078899.2
GeneID:55249	YY1AP1	1	155659442	155689032	29590	-	9	NDMM_1::995, NDMM_2::982, NDMM_3::774, LRMM_1::1176, LRMM_2::1154, LRMM_3::841, NDMM_4::1028, LRMM_4::1230, LRMM_4::1231	104, 104, 104, 136, 120, 104, 104, 520, 104	in gene, in gene, in gene, in gene, in gene, in gene, in gene, in gene, in gene	1	1	1	1	1	1	1	1	65	80	51	180	261	133	114	245	1	LRMM_1	261	Gene YY1AP1	YY1AP1, FLJ13914, YAP, HCCA2, HCCA1, FLJ10875, YY1AP	YY1 associated protein 1	NM_139119.2, NM_018253.3, NM_139118.2, NM_139121.2, NM_001198899.1, NM_001198900.1, NM_001198901.1, NM_001198902.1, NM_001198903.1, NM_001198904.1, NM_001198905.1, NM_001198906.1, XM_011509721.1, XM_011509722.1		NP_620830.1, NP_060723.2, NP_620829.1, NP_620832.1, NP_001185828.1, NP_001185829.1, NP_001185830.1, NP_001185831.1, NP_001185832.1, NP_001185833.1, NP_001185834.1, NP_001185835.1
GeneID:153241	CEP120	5	123344885	123423592	78707	-	8	NDMM_1::12879, NDMM_2::12202, NDMM_3::9259, LRMM_1::15203, LRMM_2::14851, LRMM_3::9733, NDMM_4::15532, LRMM_4::14671	8, 136, 136, -56, 136, 8, 136, 136	in gene, in gene, in gene, upstream, in gene, in gene, in gene, in gene	1	1	1	1	1	1	1	1	168	81	60	168	112	89	46	238	1	LRMM_4	238	Gene CEP120	CEP120, SRTD13, CCDC100, DKFZp686I06246, FLJ38327, FLJ36090	centrosomal protein 120kDa	NM_153223.3, NM_001166226.1, XM_011543185.1, XM_005271901.3, XM_011543186.1		NP_694955.2, NP_001159698.1
GeneID:100616220	MIR4736	17	58335976	58336022	46	-	23	NDMM_1::6811, NDMM_1::6812, NDMM_2::6267, NDMM_2::6268, NDMM_3::5048, NDMM_3::5049, LRMM_1::7843, LRMM_1::7844, LRMM_1::7845, LRMM_2::7627, LRMM_2::7628, LRMM_2::7629, LRMM_3::5156, NDMM_4::7943, NDMM_4::7944, NDMM_4::7945, NDMM_4::7946, LRMM_4::7821, LRMM_4::7822, LRMM_4::7823, LRMM_4::7824, LRMM_4::7825, LRMM_4::7826	-1962, -8426, -1994, -8442, -1994, -8426, 4118, 3638, -1994, -74, -1866, -8426, -8426, 3542, -74, -2026, -8426, 6422, 3510, 3030, -74, -2026, -8426	upstream, upstream, upstream, upstream, upstream, upstream, downstream, downstream, upstream, upstream, upstream, upstream, upstream, downstream, upstream, upstream, upstream, downstream, downstream, downstream, upstream, upstream, upstream	1	1	1	1	1	1	1	1	41.143	46.429	38	79.143	91.714	83.143	21.571	235.571	7	LRMM_4	462	Gene MIR4736	MIR4736	microRNA 4736
GeneID:54553	DKFZP434I0714	4	152536264	152539263	2999	+	8	NDMM_1::12148, NDMM_2::11562, NDMM_3::8831, LRMM_1::14467, LRMM_2::13968, LRMM_3::9285, NDMM_4::14748, LRMM_4::13951	216, 120, 216, 216, -40, 120, 184, 216	in gene, in gene, in gene, in gene, upstream, in gene, in gene, in gene	1	1	1	1	1	1	1	1	125	67	91	239	201	154	102	235	1	NDMM_4	239	Gene DKFZP434I0714		uncharacterized protein DKFZP434I0714	NR_033797.2
GeneID:100616193	MIR4453	4	152536428	152536516	88	+	8	NDMM_1::12148, NDMM_2::11562, NDMM_3::8831, LRMM_1::14467, LRMM_2::13968, LRMM_3::9285, NDMM_4::14748, LRMM_4::13951	52, -44, 52, 52, -204, -44, 20, 52	in gene, upstream, in gene, in gene, upstream, upstream, in gene, in gene	1	1	1	1	1	1	1	1	125	67	91	239	201	154	102	235	1	NDMM_4	239	Gene MIR4453	MIR4453	microRNA 4453
GeneID:9867	PJA2	5	109334709	109409974	75265	-	12	NDMM_1::12796, NDMM_1::12797, NDMM_2::12132, NDMM_2::12133, NDMM_3::9212, NDMM_3::9213, LRMM_1::15127, LRMM_2::14765, LRMM_3::9680, LRMM_3::9681, NDMM_4::15455, LRMM_4::14595	406, -202, 438, -234, 438, -298, -202, -234, 246, -554, -234, -170	in gene, upstream, in gene, upstream, in gene, upstream, upstream, upstream, in gene, upstream, upstream, upstream	1	1	1	1	1	1	1	1	131	83	63	157	222	143	84	235	1	LRMM_4	235	Gene PJA2	RNF131, Neurodap1, KIAA0438, PJA2	praja ring finger ubiquitin ligase 2	NM_014819.4		NP_055634.3
GeneID:199745	THAP8	19	36034984	36054762	19778	-	8	NDMM_1::7784, NDMM_2::7185, NDMM_3::5652, LRMM_1::9086, LRMM_2::8686, LRMM_3::5856, NDMM_4::9237, LRMM_4::9086	506, 490, 202, 522, 490, 74, 202, 522	in gene, in gene, in gene, in gene, in gene, in gene, in gene, in gene	1	1	1	1	1	1	1	1	112	68	41	122	145	85	49	233	1	LRMM_4	233	Gene THAP8	THAP8, FLJ32891	THAP domain containing 8	NM_152658.2, XM_005258623.1, XM_011526604.1		NP_689871.1, XP_005258680.1
GeneID:100652758	LOC100652758	5	151769793	151771508	1715	-	8	NDMM_1::13122, NDMM_2::12424, NDMM_3::9432, LRMM_1::15485, LRMM_2::15147, LRMM_3::9916, NDMM_4::15798, LRMM_4::14959	148, 212, 212, 212, 116, 180, -60, 84	in gene, in gene, in gene, in gene, in gene, in gene, upstream, in gene	1	1	1	1	1	1	1	1	120	114	73	200	298	155	98	231	1	LRMM_1	298	Gene LOC100652758		uncharacterized LOC100652758	NM_001278082.1		NP_001265011.1
GeneID:10146	G3BP1	5	151771915	151811356	39441	+	8	NDMM_1::13122, NDMM_2::12424, NDMM_3::9432, LRMM_1::15485, LRMM_2::15147, LRMM_3::9916, NDMM_4::15798, LRMM_4::14959	-555, -619, -619, -619, -523, -587, -347, -491	upstream, upstream, upstream, upstream, upstream, upstream, upstream, upstream	1	1	1	1	1	1	1	1	120	114	73	200	298	155	98	231	1	LRMM_1	298	Gene G3BP1	MGC111040, HDH-VIII, G3BP, G3BP1	G3BP stress granule assembly factor 1	NM_005754.2, NM_198395.1, XM_006714749.2, XM_006714750.2		NP_005745.1, NP_938405.1
GeneID:4253	CTAGE5	14	39265272	39351193	85921	+	11	NDMM_1::4489, NDMM_2::4391, NDMM_2::4392, NDMM_3::3458, NDMM_3::3459, LRMM_1::5319, LRMM_2::5185, LRMM_3::3525, NDMM_4::5322, NDMM_4::5323, LRMM_4::5290	1992, 1288, 1896, 1320, 2056, 1992, 2056, 1896, 1352, 1992, 1928	in gene, in gene, in gene, in gene, in gene, in gene, in gene, in gene, in gene, in gene, in gene	1	1	1	1	1	1	1	1	122	70	85	184	143	132	97	231	1	LRMM_4	231	Gene CTAGE5	CTAGE5, MGEA6, MEA6, MGEA11, MGEA	CTAGE family member 5	NM_203355.2, NM_203356.2, NM_005930.3, NM_203354.2, NM_001247988.1, NM_001247989.1, NM_001247990.1, XM_006720148.1, XM_011536775.1, XM_011536776.1, XM_011536778.1, XM_005267648.3, XM_011536779.1, XM_011536780.1, XM_011536781.1, XM_011536782.1, XM_01153678		NP_976230.1, NP_976231.1, NP_005921.2, NP_976229.1, NP_001234917.1, NP_001234918.1, NP_001234919.1, XP_006720211.1
GeneID:100288846	LOC100288846	14	39265703	39267061	1358	-	11	NDMM_1::4489, NDMM_2::4391, NDMM_2::4392, NDMM_3::3458, NDMM_3::3459, LRMM_1::5319, LRMM_2::5185, LRMM_3::3525, NDMM_4::5322, NDMM_4::5323, LRMM_4::5290	-203, 501, -107, 469, -267, -203, -267, -107, 437, -203, -139	upstream, in gene, upstream, in gene, upstream, upstream, upstream, upstream, in gene, upstream, upstream	1	1	1	1	1	1	1	1	122	70	85	184	143	132	97	231	1	LRMM_4	231	Gene LOC100288846		uncharacterized LOC100288846	NR_038935.1
GeneID:406934	MIR142	17	58331232	58331318	86	-	16	NDMM_1::6811, NDMM_2::6267, NDMM_3::5048, LRMM_1::7843, LRMM_1::7844, LRMM_1::7845, LRMM_2::7627, LRMM_2::7628, NDMM_4::7943, NDMM_4::7944, NDMM_4::7945, LRMM_4::7821, LRMM_4::7822, LRMM_4::7823, LRMM_4::7824, LRMM_4::7825	-6666, -6698, -6698, -586, -1066, -6698, -4778, -6570, -1162, -4778, -6730, 1718, -1194, -1674, -4778, -6730	upstream, upstream, upstream, upstream, upstream, upstream, upstream, upstream, upstream, upstream, upstream, downstream, upstream, upstream, upstream, upstream	1	1	1	1	1	1	0	1	43.333	47.167	38.833	77.667	104.667	77.167	18	229.167	6	LRMM_4	462	Gene MIR142	mir-142, MIRN142, MIR142	microRNA 142
GeneID:3376	IARS	9	92210207	92293756	83549	-	8	NDMM_1::16348, NDMM_2::15278, NDMM_3::11700, LRMM_1::19526, LRMM_2::18576, LRMM_3::12207, NDMM_4::19761, LRMM_4::18304	-68, -4, -68, -20, 28, -132, -4, -4	upstream, upstream, upstream, upstream, in gene, upstream, upstream, upstream	1	1	1	1	1	1	1	1	79	81	73	128	165	41	32	229	1	LRMM_4	229	Gene IARS	PRO0785, IARS, FLJ20736, ILERS, IRS, ILRS, IARS1	isoleucyl-tRNA synthetase	NM_002161.5, NM_013417.3, NR_073446.1		NP_002152.2, NP_038203.2
GeneID:100500918	MIR3651	9	92292458	92292547	89	-	8	NDMM_1::16348, NDMM_2::15278, NDMM_3::11700, LRMM_1::19526, LRMM_2::18576, LRMM_3::12207, NDMM_4::19761, LRMM_4::18304	-1277, -1213, -1277, -1229, -1181, -1341, -1213, -1213	upstream, upstream, upstream, upstream, upstream, upstream, upstream, upstream	1	1	1	1	1	1	1	1	79	81	73	128	165	41	32	229	1	LRMM_4	229	Gene MIR3651	mir-3651, MIR3651	microRNA 3651
GeneID:100124534	SNORA84	9	92292461	92292593	132	-	8	NDMM_1::16348, NDMM_2::15278, NDMM_3::11700, LRMM_1::19526, LRMM_2::18576, LRMM_3::12207, NDMM_4::19761, LRMM_4::18304	-1231, -1167, -1231, -1183, -1135, -1295, -1167, -1167	upstream, upstream, upstream, upstream, upstream, upstream, upstream, upstream	1	1	1	1	1	1	1	1	79	81	73	128	165	41	32	229	1	LRMM_4	229	Gene SNORA84	SNORA84	small nucleolar RNA, H/ACA box 84	NR_003704.2
GeneID:29988	SLC2A8	9	127397138	127407898	10760	+	8	NDMM_1::16585, NDMM_2::15478, NDMM_3::11855, LRMM_1::19846, LRMM_2::18846, LRMM_3::12371, NDMM_4::20060, LRMM_4::18563	-210, -274, -210, -210, -210, -274, -210, -210	upstream, upstream, upstream, upstream, upstream, upstream, upstream, upstream	1	1	1	1	1	1	1	1	78	65	40	182	228	69	42	227	1	LRMM_1	228	Gene SLC2A8	GLUTX1, GLUT8, SLC2A8	solute carrier family 2 member 8	NM_001271712.1, NR_073416.1, NM_001271711.1, NM_014580.4, XM_011518602.1, XM_006717084.2, XM_011518603.1, XM_011518604.1, XR_929783.1		NP_001258641.1, NP_001258640.1, NP_055395.2
GeneID:51569	UFM1	13	38349771	38363007	13236	+	8	NDMM_1::4095, NDMM_2::4148, NDMM_3::3158, LRMM_1::4913, LRMM_2::4816, LRMM_3::3321, NDMM_4::4928, LRMM_4::4894	-75, -11, -107, -107, -107, -107, -91, -107	upstream, upstream, upstream, upstream, upstream, upstream, upstream, upstream	1	1	1	1	1	1	1	1	150	85	112	108	183	91	86	226	1	LRMM_4	226	Gene UFM1	bA131P10.1, UFM1, C13orf20, BM-002	ubiquitin-fold modifier 1	NM_001286706.1, NM_001286704.1, NM_001286705.1, NM_016617.3, NM_001286703.1, NR_104584.1, NR_104585.1		NP_001273635.1, NP_001273633.1, NP_001273634.1, NP_057701.1, NP_001273632.1
GeneID:100506775	LINC01353	1	203287152	203288798	1646	+	25	NDMM_1::1282, NDMM_1::1283, NDMM_1::1284, NDMM_2::1299, NDMM_2::1300, NDMM_3::1016, NDMM_3::1017, NDMM_3::1018, LRMM_1::1676, LRMM_1::1677, LRMM_1::1678, LRMM_2::1675, LRMM_2::1676, LRMM_2::1677, LRMM_3::1171, LRMM_3::1172, LRMM_3::1173, LRMM_3::1174, NDMM_4::1440, NDMM_4::1441, NDMM_4::1442, LRMM_4::1648, LRMM_4::1649, LRMM_4::1650, LRMM_4::1651	272, 2480, 3472, 368, 3472, 288, 2512, 3312, 272, 2608, 3344, 304, 2576, 3568, -8464, 304, 2448, 3344, 304, 2448, 3472, -8496, 464, 2512, 3472	in gene, downstream, downstream, in gene, downstream, in gene, downstream, downstream, in gene, downstream, downstream, in gene, downstream, downstream, upstream, in gene, downstream, downstream, in gene, downstream, downstream, upstream, in gene, downstream, downstream	1	1	1	1	1	1	1	1	84	52.25	48.25	214.5	218	163.75	120.25	225.75	4	LRMM_4	352	Gene LINC01353	LINC01353, RP11-134P9.3	long intergenic non-protein coding RNA 1353	NR_117097.1, NR_117098.1
GeneID:440072	LINC00167	11	130002624	130005486	2862	+	8	NDMM_1::3181, NDMM_2::3103, NDMM_3::2404, LRMM_1::3900, LRMM_2::3743, LRMM_3::2510, NDMM_4::3686, LRMM_4::3774	288, 288, 128, 128, 128, 288, 288, 448	in gene, in gene, in gene, in gene, in gene, in gene, in gene, in gene	1	1	1	1	1	1	1	1	138	128	63	250	447	134	93	224	1	LRMM_1	447	Gene LINC00167	MGC168927, MGC168926, NCRNA00167, C11orf37, FLJ31394, LINC00167	long intergenic non-protein coding RNA 167	NR_024233.1
GeneID:105369195	LOC105369195	1	223951266	223983034	31768	-	8	NDMM_1::1410, NDMM_2::1441, NDMM_3::1112, LRMM_1::1879, LRMM_2::1809, LRMM_3::1292, NDMM_4::1631, LRMM_4::1854	-9702, -9926, -9622, -9510, -9510, -9702, -9670, -9702	upstream, upstream, upstream, upstream, upstream, upstream, upstream, upstream	1	1	1	1	1	1	1	1	69	72	69	159	214	49	56	224	1	LRMM_4	224	Gene LOC105369195		putative uncharacterized protein FLJ44672	XR_426927.1, XR_426929.1, XM_011508968.1, XR_921137.1, XR_921138.1, XR_921139.1, XR_921140.1, XR_921141.1, XR_921142.1, XR_921143.1, XR_921150.1, XR_921154.1, XR_921157.1, XR_921158.1, XR_921159.1, XR_431363.2, XR_921162.1, XR_921163.1, XR_921164.1, XR_92
GeneID:101926980	LOC101926980	1	223992709	224004864	12155	+	8	NDMM_1::1410, NDMM_2::1441, NDMM_3::1112, LRMM_1::1879, LRMM_2::1809, LRMM_3::1292, NDMM_4::1631, LRMM_4::1854	27, 251, -53, -165, -165, 27, -5, 27	in gene, in gene, upstream, upstream, upstream, in gene, upstream, in gene	1	1	1	1	1	1	1	1	69	72	69	159	214	49	56	224	1	LRMM_4	224	Gene LOC101926980		uncharacterized LOC101926980	XR_921130.1, XR_921131.1, XR_921132.1, XR_921133.1, XR_921134.1, XR_431358.2, XR_431357.2, XR_949175.1, XR_949176.1, XR_949177.1, XR_949178.1, XR_949179.1, XR_426922.2, XR_426921.2
GeneID:102723166	STAM-AS1	10	17641284	17643918	2634	-	8	NDMM_1::1653, NDMM_2::1698, NDMM_3::1316, LRMM_1::2205, LRMM_2::2087, LRMM_3::1450, NDMM_4::1957, LRMM_4::2130	-18, -146, -114, -114, -130, -146, -146, -114	upstream, upstream, upstream, upstream, upstream, upstream, upstream, upstream	1	1	1	1	1	1	1	1	106	144	71	219	190	124	56	223	1	LRMM_4	223	Gene STAM-AS1	STAM-AS1, locus3182	STAM antisense RNA 1 (head to head)	NR_110370.1
GeneID:8027	STAM	10	17644125	17716824	72699	+	8	NDMM_1::1653, NDMM_2::1698, NDMM_3::1316, LRMM_1::2205, LRMM_2::2087, LRMM_3::1450, NDMM_4::1957, LRMM_4::2130	-189, -61, -93, -93, -77, -61, -61, -93	upstream, upstream, upstream, upstream, upstream, upstream, upstream, upstream	1	1	1	1	1	1	1	1	106	144	71	219	190	124	56	223	1	LRMM_4	223	Gene STAM	STAM1, STAM, DKFZp686J2352	signal transducing adaptor molecule	NM_003473.3, NR_037774.1, XM_011519695.1, XM_005252603.2		NP_003464.1
GeneID:4697	NDUFA4	7	10931953	10940186	8233	-	8	NDMM_1::14457, NDMM_2::13529, NDMM_3::10360, LRMM_1::16858, LRMM_2::16616, LRMM_3::10916, NDMM_4::17419, LRMM_4::16322	-86, -102, -198, -70, -134, -38, -134, -134	upstream, upstream, upstream, upstream, upstream, upstream, upstream, upstream	1	1	1	1	1	1	1	1	158	66	109	198	473	138	98	221	1	LRMM_1	473	Gene NDUFA4	FLJ27440, NDUFA4, CI-9k, CI-MLRQ, MGC126843, MLRQ, MGC126845, MGC104422	NDUFA4, mitochondrial complex associated	NM_002489.3		NP_002480.1
GeneID:285672	SREK1IP1	5	64718148	64768731	50583	-	8	NDMM_1::12528, NDMM_2::11914, NDMM_3::9054, LRMM_1::14848, LRMM_2::14471, LRMM_3::9528, NDMM_4::15201, LRMM_4::14332	-37, -37, -69, -69, -37, -37, -53, -37	upstream, upstream, upstream, upstream, upstream, upstream, upstream, upstream	1	1	1	1	1	1	1	1	123	150	74	178	190	199	74	221	1	LRMM_4	221	Gene SREK1IP1	FLJ36754, P18SRP, MGC150549, MGC150548, SREK1IP1, MGC131910, SFRS12IP1	SREK1 interacting protein 1	NM_173829.3, XM_011543344.1		NP_776190.1
GeneID:558	AXL	19	41219199	41261767	42568	+	9	NDMM_1::7861, NDMM_2::7260, NDMM_3::5694, NDMM_3::5695, LRMM_1::9185, LRMM_2::8772, LRMM_3::5918, NDMM_4::9336, LRMM_4::9183	44886, 45185, 44257, 44881, 45185, 44897, 45185, 44993, 44897	downstream, downstream, downstream, downstream, downstream, downstream, downstream, downstream, downstream	1	1	1	1	1	1	1	1	128	75	37	158	214	98	57	221	1	LRMM_4	221	Gene AXL	JTK11, ARK, AXL, UFO, Tyro7	AXL receptor tyrosine kinase	NM_001699.5, NM_001278599.1, NM_021913.4		NP_001690.2, NP_001265528.1, NP_068713.2
GeneID:105372402	LOC105372402	19	41261289	41264282	2993	-	9	NDMM_1::7861, NDMM_2::7260, NDMM_3::5694, NDMM_3::5695, LRMM_1::9185, LRMM_2::8772, LRMM_3::5918, NDMM_4::9336, LRMM_4::9183	197, -102, 826, 202, -102, 186, -102, 90, 186	in gene, upstream, in gene, in gene, upstream, in gene, upstream, in gene, in gene	1	1	1	1	1	1	1	1	128	75	37	158	214	98	57	221	1	LRMM_4	221	Gene LOC105372402		uncharacterized LOC105372402	XR_919645.1, XR_935969.1
GeneID:51125	GOLGA7	8	41490562	41510980	20418	+	8	NDMM_1::15540, NDMM_2::14457, NDMM_3::11059, LRMM_1::18226, LRMM_2::17668, LRMM_3::11605, NDMM_4::18610, LRMM_4::17327	-66, -66, -130, -18, -66, -66, -66, -66	upstream, upstream, upstream, upstream, upstream, upstream, upstream, upstream	1	1	1	1	1	1	1	1	98	89	61	165	196	80	75	220	1	LRMM_4	220	Gene GOLGA7	GOLGA7, GCP16, GOLGA3AP1, MGC4876, HSPC041, MGC21096, GOLGA7A	golgin A7	NM_001002296.1, NM_016099.2, NM_001174124.1		NP_001002296.1, NP_057183.2, NP_001167595.1
GeneID:123169	LEO1	15	51938025	51971801	33776	-	9	NDMM_1::5285, NDMM_2::4857, NDMM_2::4858, NDMM_3::3959, LRMM_1::6030, LRMM_2::5940, LRMM_3::4027, NDMM_4::6126, LRMM_4::6033	89, 35993, 89, 121, 89, 89, 89, 89, 89	in gene, downstream, in gene, in gene, in gene, in gene, in gene, in gene, in gene	1	1	1	1	1	1	1	1	105	69.5	44	82	220	85	57	220	2	LRMM_1	437	Gene LEO1	RDL, LEO1	LEO1 homolog, Paf1/RNA polymerase II complex component	NM_001286430.1, NM_138792.3, XM_011521211.1		NP_001273359.1, NP_620147.1
GeneID:100216546	LINC01004	7	104981747	104991165	9418	-	8	NDMM_1::15021, NDMM_2::14001, NDMM_3::10732, LRMM_1::17612, LRMM_2::17161, LRMM_3::11269, NDMM_4::17997, LRMM_4::16835	7005, 7069, 6909, 7085, 7069, 7101, 7069, 7069	in gene, in gene, in gene, in gene, in gene, in gene, in gene, in gene	1	1	1	1	1	1	1	1	193	156	90	253	464	143	137	219	1	LRMM_1	464	Gene LINC01004	FLJ41601, LINC01004, FLJ44142, FLJ35127	long intergenic non-protein coding RNA 1004	NR_039981.2
GeneID:105371616	LOC105371616	1	172515145	172532473	17328	-	8	NDMM_1::1144, NDMM_2::1148, NDMM_3::888, LRMM_1::1434, LRMM_2::1389, LRMM_3::997, NDMM_4::1234, LRMM_4::1445	-199, -167, -199, -679, -199, -183, -199, -647	upstream, upstream, upstream, upstream, upstream, upstream, upstream, upstream	1	1	1	1	1	1	1	1	83	101	70	133	405	186	104	219	1	LRMM_1	405	Gene LOC105371616		uncharacterized LOC105371616	XR_918082.1, XR_922288.1
GeneID:80219	COQ10B	2	197453507	197475135	21628	+	8	NDMM_1::9189, NDMM_2::8567, NDMM_3::6667, LRMM_1::10804, LRMM_2::10268, LRMM_3::6982, NDMM_4::11084, LRMM_4::10763	-131, -99, 61, -3, -355, 61, -131, -195	upstream, upstream, in gene, upstream, upstream, in gene, upstream, upstream	1	1	1	1	1	1	1	1	133	93	70	173	256	74	81	219	1	LRMM_1	256	Gene COQ10B	FLJ13448, COQ10B	coenzyme Q10B	NM_025147.3, XM_006712776.2		NP_079423.1
GeneID:9373	PLAA	9	26903370	26947470	44100	-	16	NDMM_1::16130, NDMM_1::16131, NDMM_2::15072, NDMM_2::15073, NDMM_3::11553, NDMM_3::11554, LRMM_1::19213, LRMM_1::19214, LRMM_2::18361, LRMM_2::18362, LRMM_3::12042, LRMM_3::12043, NDMM_4::19495, NDMM_4::19496, LRMM_4::18039, LRMM_4::18040	334, -8978, 334, -8994, 398, -8978, 334, -8978, 334, -9090, 334, -9010, 254, -8978, 334, -9010	in gene, upstream, in gene, upstream, in gene, upstream, in gene, upstream, in gene, upstream, in gene, upstream, in gene, upstream, in gene, upstream	1	1	1	1	1	1	1	1	95.5	73	56	101.5	155.5	31	58	219	2	LRMM_4	260	Gene PLAA	FLJ12699, FLJ11281, PLAP, PLAA, DOA1, PLA2P		NM_001031689.2, XM_011518071.1, XM_011518072.1		NP_001026859.1
GeneID:80173	IFT74	9	26947039	27066129	119090	+	16	NDMM_1::16130, NDMM_1::16131, NDMM_2::15072, NDMM_2::15073, NDMM_3::11553, NDMM_3::11554, LRMM_1::19213, LRMM_1::19214, LRMM_2::18361, LRMM_2::18362, LRMM_3::12042, LRMM_3::12043, NDMM_4::19495, NDMM_4::19496, LRMM_4::18039, LRMM_4::18040	97, 9409, 97, 9425, 33, 9409, 97, 9409, 97, 9521, 97, 9441, 177, 9409, 97, 9441	in gene, in gene, in gene, in gene, in gene, in gene, in gene, in gene, in gene, in gene, in gene, in gene, in gene, in gene, in gene, in gene	1	1	1	1	1	1	1	1	95.5	73	56	101.5	155.5	31	58	219	2	LRMM_4	260	Gene IFT74	CMG1, IFT74, CMG-1, MGC111562, CCDC2, FLJ22621	intraflagellar transport 74	NM_001099223.1, NM_001099224.1, NM_001099222.1, NM_025103.2, XM_011518035.1, XM_011518036.1		NP_001092693.1, NP_001092694.1, NP_001092692.1, NP_079379.2
GeneID:101929602	IFT74-AS1	9	26955780	26956307	527	-	16	NDMM_1::16130, NDMM_1::16131, NDMM_2::15072, NDMM_2::15073, NDMM_3::11553, NDMM_3::11554, LRMM_1::19213, LRMM_1::19214, LRMM_2::18361, LRMM_2::18362, LRMM_3::12042, LRMM_3::12043, NDMM_4::19495, NDMM_4::19496, LRMM_4::18039, LRMM_4::18040	9171, -141, 9171, -157, 9235, -141, 9171, -141, 9171, -253, 9171, -173, 9091, -141, 9171, -173	downstream, upstream, downstream, upstream, downstream, upstream, downstream, upstream, downstream, upstream, downstream, upstream, downstream, upstream, downstream, upstream	1	1	1	1	1	1	1	1	95.5	73	56	101.5	155.5	31	58	219	2	LRMM_4	260	Gene IFT74-AS1	IFT74-AS1	IFT74 antisense RNA 1	NR_121605.1
GeneID:79905	TMC7	16	18983934	19063942	80008	+	8	NDMM_1::5997, NDMM_2::5390, NDMM_3::4323, LRMM_1::6712, LRMM_2::6515, LRMM_3::4448, NDMM_4::6807, LRMM_4::6730	83682, 83682, 83746, 83746, 83730, 83746, 83682, 83682	downstream, downstream, downstream, downstream, downstream, downstream, downstream, downstream	1	1	1	1	1	1	1	1	98	101	66	167	251	93	72	218	1	LRMM_1	251	Gene TMC7	TMC7, DKFZp781O2274, FLJ21240	transmembrane channel like 7	NM_001160364.2, NM_024847.4, NM_001300732.1, XM_011545959.1		NP_001153836.1, NP_079123.3, NP_001287661.1
GeneID:102723385	LOC102723385	16	19062754	19067691	4937	-	8	NDMM_1::5997, NDMM_2::5390, NDMM_3::4323, LRMM_1::6712, LRMM_2::6515, LRMM_3::4448, NDMM_4::6807, LRMM_4::6730	75, 75, 11, 11, 27, 11, 75, 75	in gene, in gene, in gene, in gene, in gene, in gene, in gene, in gene	1	1	1	1	1	1	1	1	98	101	66	167	251	93	72	218	1	LRMM_1	251	Gene LOC102723385		uncharacterized LOC102723385	NR_119379.1, NR_119380.1, NR_119381.1, NR_119382.1
GeneID:10229	COQ7	16	19067595	19080095	12500	+	8	NDMM_1::5997, NDMM_2::5390, NDMM_3::4323, LRMM_1::6712, LRMM_2::6515, LRMM_3::4448, NDMM_4::6807, LRMM_4::6730	21, 21, 85, 85, 69, 85, 21, 21	in gene, in gene, in gene, in gene, in gene, in gene, in gene, in gene	1	1	1	1	1	1	1	1	98	101	66	167	251	93	72	218	1	LRMM_1	251	Gene COQ7	COQ7, CLK1, CAT5, CLK-1, COQ10D8	coenzyme Q7 homolog, ubiquinone (yeast)	NM_001190983.1, NM_016138.4, XR_950722.1		NP_001177912.1, NP_057222.2
GeneID:1024	CDK8	13	26254125	26405238	151113	+	8	NDMM_1::4024, NDMM_2::4108, NDMM_3::3095, LRMM_1::4862, LRMM_2::4768, LRMM_3::3293, NDMM_4::4873, LRMM_4::4832	-125, -109, -125, -141, 51, -21, -141, -141	upstream, upstream, upstream, upstream, in gene, upstream, upstream, upstream	1	1	1	1	1	1	1	1	86	38	49	103	157	58	36	218	1	LRMM_4	218	Gene CDK8	MGC126075, MGC126074, K35, CDK8	cyclin-dependent kinase 8	NM_001260.1, XM_005266215.1, XM_005266216.3, XM_011534863.1, XM_011534864.1, XM_011534865.1		NP_001251.1, XP_005266272.1
GeneID:123228	SENP8	15	72114258	72140970	26712	+	8	NDMM_1::5514, NDMM_2::5026, NDMM_3::4076, LRMM_1::6215, LRMM_2::6106, LRMM_3::4160, NDMM_4::6316, LRMM_4::6235	4142, 4174, 4174, 4078, 4174, 4174, 4174, 4046	in gene, in gene, in gene, in gene, in gene, in gene, in gene, in gene	1	1	1	1	1	1	1	1	143	95	72	147	218	110	78	217	1	LRMM_1	218	Gene SENP8	DEN1, NEDP1, PRSC2, SENP8	SUMO/sentrin peptidase family member, NEDD8 specific	NM_145204.3, NM_001166340.1, NM_001172109.1, NM_001172110.1, NM_001172111.1, XM_011521215.1, XM_011521216.1, XM_011521217.1, XM_005254157.2		NP_660205.3, NP_001159812.1, NP_001165580.1, NP_001165581.1, NP_001165582.1
GeneID:51649	MRPS23	17	57838926	57850072	11146	-	7	NDMM_1::6805, NDMM_2::6262, LRMM_1::7836, LRMM_2::7622, LRMM_3::5153, NDMM_4::7937, LRMM_4::7804	-264, -296, -232, -344, -232, -136, -104	upstream, upstream, upstream, upstream, upstream, upstream, upstream	1	1	0	1	1	1	1	1	27	32	6	41	83	26	42	217	1	LRMM_4	217	Gene MRPS23	CGI-138, MRP-S23, HSPC329, MRPS23	mitochondrial ribosomal protein S23	NM_016070.3		NP_057154.2
GeneID:79143	MBOAT7	19	54173412	54189882	16470	-	11	NDMM_1::8076, NDMM_2::7451, NDMM_3::5816, NDMM_3::5817, LRMM_1::9406, LRMM_2::8965, LRMM_2::8966, LRMM_3::6069, LRMM_3::6070, NDMM_4::9608, LRMM_4::9454	-454, -486, -134, -1158, -454, 9914, -1158, -486, -1030, -486, -454	upstream, upstream, upstream, upstream, upstream, in gene, upstream, upstream, upstream, upstream, upstream	1	1	1	1	1	1	1	1	99.5	57.5	28	113.5	173.5	49	41.5	217	2	LRMM_4	429	Gene MBOAT7	LPIAT, FLJ41296, OACT7, hMBOA-7, BB1, MBOA7, MBOAT7, LRC4, LENG4	membrane bound O-acyltransferase domain containing 7	NM_024298.4, NM_001146056.2, NM_001146083.2, NM_001146082.2, XM_011527299.1, XM_011527300.1, XM_011547124.1, XM_011547534.1, XM_011547796.1, XM_011547992.1, XM_011548171.1, XM_011548363.1, XM_011548570.1, XM_011548628.1, XM_011548717.1		NP_077274.3, NP_001139528.1, NP_001139555.1, NP_001139554.1
GeneID:57165	GJC2	1	228149714	228159826	10112	+	17	NDMM_1::1454, NDMM_1::1455, NDMM_2::1485, NDMM_2::1486, NDMM_3::1152, NDMM_3::1153, LRMM_1::1952, LRMM_1::1953, LRMM_2::1850, LRMM_2::1851, LRMM_3::1334, LRMM_3::1335, NDMM_4::1695, NDMM_4::1696, LRMM_4::1919, LRMM_4::1920, LRMM_4::1921	-9570, 16110, -9650, 16078, -9682, 16094, -9586, 16110, -9666, 16185, -9618, 16110, -9586, 16238, -9682, 16174, 16846	upstream, downstream, upstream, downstream, upstream, downstream, upstream, downstream, upstream, downstream, upstream, downstream, upstream, downstream, upstream, downstream, downstream	1	1	1	1	1	1	1	1	66.5	72.5	39.5	168.5	241	32	50	216	2	LRMM_1	251	Gene GJC2	GJA12, PMLDAR, CX46.6, MGC105119, HLD2, LMPH1C, SPG44, GJC2, Cx47	gap junction protein gamma 2	NM_020435.3		NP_065168.2
GeneID:105376199	LOC105376199	9	105554035	105558280	4245	-	8	NDMM_1::16442, NDMM_2::15365, NDMM_3::11762, LRMM_1::19676, LRMM_2::18701, LRMM_3::12268, NDMM_4::19887, LRMM_4::18423	136, 104, 136, 136, 136, 136, 136, 104	in gene, in gene, in gene, in gene, in gene, in gene, in gene, in gene	1	1	1	1	1	1	1	1	94	53	25	131	251	111	45	216	1	LRMM_1	251	Gene LOC105376199		uncharacterized LOC105376199	XR_958706.1, XR_958707.1, XR_958709.1, XR_930209.1, XR_930210.1, XR_930211.1
GeneID:105374852	LOC105374852	2	88016791	88021354	4563	+	7	NDMM_1::8704, NDMM_2::8089, NDMM_3::6278, LRMM_1::10155, LRMM_2::9655, NDMM_4::10375, LRMM_4::10200	105, 105, -119, -23, 9, 105, 121	in gene, in gene, upstream, upstream, in gene, in gene, in gene	1	1	1	1	1	1	0	1	104	133	62	164	430	24	12	216	1	LRMM_1	430	Gene LOC105374852		uncharacterized LOC105374852	XR_926262.1, XR_926263.1, XR_926264.1, XR_940335.1, XR_940336.1, XR_940337.1
GeneID:8662	EIF3B	7	2354540	2380745	26205	+	8	NDMM_1::14368, NDMM_2::13487, NDMM_3::10318, LRMM_1::16768, LRMM_2::16554, LRMM_3::10876, NDMM_4::17355, LRMM_4::16254	148, 180, 180, 148, 164, -236, 148, 148	in gene, in gene, in gene, in gene, in gene, upstream, in gene, in gene	1	1	1	1	1	1	1	1	180	109	70	214	342	122	112	214	1	LRMM_1	342	Gene EIF3B	EIF3-P116, EIF3-ETA, MGC104664, EIF3-P110, PRT1, EIF3B, MGC131875, EIF3S9		NM_001037283.1, NM_003751.3, XM_011515599.1, XM_011515600.1, XM_011515601.1		NP_001032360.1, NP_003742.2
GeneID:81688	C6orf62	6	24704861	24720836	15975	-	9	NDMM_1::13476, NDMM_1::13477, NDMM_2::12744, NDMM_3::9631, LRMM_1::15829, LRMM_2::15504, LRMM_3::10137, NDMM_4::16209, LRMM_4::15375	452, -188, -252, -236, -252, -252, -188, -188, -220	in gene, upstream, upstream, upstream, upstream, upstream, upstream, upstream, upstream	1	1	1	1	1	1	1	1	125	91	66	187	275	84	107	214	1	LRMM_1	275	Gene C6orf62	dJ30M3.2, XTP12, FLJ12619, DKFZp564G182, C6orf62, Nbla00237	chromosome 6 open reading frame 62	NM_030939.4, XM_011514928.1, XM_005249433.2		NP_112201.1
GeneID:6734	SRPR	11	126262919	126268982	6063	-	8	NDMM_1::3154, NDMM_2::3083, NDMM_3::2392, LRMM_1::3865, LRMM_2::3703, LRMM_3::2503, NDMM_4::3653, LRMM_4::3738	-74, -74, -74, -74, -74, -170, -74, 22	upstream, upstream, upstream, upstream, upstream, upstream, upstream, in gene	1	1	1	1	1	1	1	1	92	67	51	113	178	71	70	214	1	LRMM_4	214	Gene SRPR	MGC9571, SRPRA, MGC17355, MGC3650, SRP-alpha, DP, SRPR, Sralpha	SRP receptor alpha subunit	NM_001177842.1, NM_003139.3		NP_001171313.1, NP_003130.2
GeneID:126859	AXDND1	1	179365718	179554735	189017	+	8	NDMM_1::1178, NDMM_2::1192, NDMM_3::917, LRMM_1::1498, LRMM_2::1445, LRMM_3::1048, NDMM_4::1277, LRMM_4::1507	106, 106, 122, 106, 138, 138, 106, 138	in gene, in gene, in gene, in gene, in gene, in gene, in gene, in gene	1	1	1	1	1	1	1	1	89	89	58	121	124	204	41	213	1	LRMM_4	213	Gene AXDND1	FLJ32940, RP11-215I23.2, FLJ25438, DKFZp686H1423, C1orf125, AXDND1	axonemal dynein light chain domain containing 1	NM_144696.5, NR_073544.1, XM_011509165.1, XM_011509166.1, XM_011509167.1, XM_011509168.1, XM_011509169.1, XM_011509170.1, XM_011509171.1, XM_011509172.1, XM_011509173.1, XM_011509174.1, XM_011509175.1, XM_011509176.1, XM_011509177.1, XM_011509178.1, XM_01		NP_653297.3
GeneID:64222	TOR3A	1	179081977	179095996	14019	+	8	NDMM_1::1175, NDMM_2::1188, NDMM_3::915, LRMM_1::1491, LRMM_2::1437, LRMM_3::1044, NDMM_4::1274, LRMM_4::1501	135, 135, 167, 199, 135, 199, 71, 71	in gene, in gene, in gene, in gene, in gene, in gene, in gene, in gene	1	1	1	1	1	1	1	1	80	76	64	140	262	182	102	212	1	LRMM_1	262	Gene TOR3A	ADIR2, TOR3A, FLJ22345, MGC111104, ADIR	torsin family 3 member A	NM_022371.3		NP_071766.2
GeneID:645676	ASH1L-AS1	1	155561981	155563944	1963	+	11	NDMM_1::993, NDMM_2::980, NDMM_3::773, LRMM_1::1174, LRMM_2::1151, LRMM_2::1152, LRMM_3::838, LRMM_3::839, NDMM_4::1026, LRMM_4::1227, LRMM_4::1228	1123, 1123, 1091, 1091, 227, 1091, 227, 1091, 1091, 643, 1091	in gene, in gene, in gene, in gene, in gene, in gene, in gene, in gene, in gene, in gene, in gene	1	1	1	1	1	1	1	1	43	81	34	125	269	215	62	212	1	LRMM_1	269	Gene ASH1L-AS1	FLJ44595, ASH1L-AS1	ASH1L antisense RNA 1	NR_027023.1
GeneID:6143	RPL19	17	39200283	39204727	4444	+	8	NDMM_1::6617, NDMM_2::6065, NDMM_3::4910, LRMM_1::7551, LRMM_2::7366, LRMM_3::5004, NDMM_4::7685, LRMM_4::7526	-123, -123, -123, -27, -75, -123, -123, -123	upstream, upstream, upstream, upstream, upstream, upstream, upstream, upstream	1	1	1	1	1	1	1	1	91	93	49	148	317	95	88	211	1	LRMM_1	317	Gene RPL19	RPL19, FLJ27452, L19, MGC71997, DKFZp779D216	ribosomal protein L19	NM_000981.3, XM_005257564.2		NP_000972.1
GeneID:1385	CREB1	2	207529892	207605560	75668	+	8	NDMM_1::9257, NDMM_2::8644, NDMM_3::6726, LRMM_1::10898, LRMM_2::10362, LRMM_3::7040, NDMM_4::11164, LRMM_4::10844	-356, -164, -164, 28, -164, -164, -164, -164	upstream, upstream, upstream, in gene, upstream, upstream, upstream, upstream	1	1	1	1	1	1	1	1	86	80	72	212	155	83	90	210	1	NDMM_4	212	Gene CREB1	MGC9284, CREB, CREB1	cAMP responsive element binding protein 1	NM_134442.3, NM_004379.3, XR_241289.1, XR_241290.1, XR_241292.1, XR_427071.1, XM_011510645.1, XM_011510646.1, XM_011510647.1, XM_011510648.1, XM_011510649.1, XM_011510650.1, XM_011510651.1, XM_011510652.1, XM_011510653.1, XR_922862.1		NP_604391.1, NP_004370.1
GeneID:996	CDC27	17	47117697	47189312	71615	-	9	NDMM_1::6718, NDMM_2::6178, NDMM_3::4994, LRMM_1::7720, LRMM_2::7504, LRMM_2::7505, LRMM_3::5093, NDMM_4::7842, LRMM_4::7690	128, 192, 192, 128, 768, 192, 192, 96, 96	in gene, in gene, in gene, in gene, in gene, in gene, in gene, in gene, in gene	1	1	1	1	1	1	1	1	80	82	50	123	195	87	78	210	1	LRMM_4	210	Gene CDC27	D0S1430E, APC3, CDC27, HNUC, ANAPC3, D17S978E, CDC27Hs, NUC2	cell division cycle 27	NM_001114091.2, NM_001256.4, NM_001293089.1, NM_001293091.1, XM_011525546.1, XR_934630.1, XM_011525547.1, XM_011525548.1, XM_011525549.1, XM_011525550.1		NP_001107563.1, NP_001247.3, NP_001280018.1, NP_001280020.1
GeneID:7415	VCP	9	35056068	35072742	16674	-	17	NDMM_1::16180, NDMM_1::16181, NDMM_2::15114, NDMM_2::15115, NDMM_3::11587, NDMM_3::11588, LRMM_1::19293, LRMM_1::19294, LRMM_2::18407, LRMM_2::18408, LRMM_3::12078, LRMM_3::12079, LRMM_3::12080, NDMM_4::19556, NDMM_4::19557, LRMM_4::18114, LRMM_4::18115	678, -7130, 678, -7194, 486, -7194, 678, -7130, 678, -7146, 678, 134, -7194, 774, -7162, 678, -7162	in gene, upstream, in gene, upstream, in gene, upstream, in gene, upstream, in gene, upstream, in gene, in gene, upstream, in gene, upstream, in gene, upstream	1	1	1	1	1	1	1	1	65	46.5	33	72.5	213	42.5	55.5	210	2	LRMM_1	349	Gene VCP	VCP, p97, MGC148092, MGC8560, ALS14, IBMPFD1, CMT2Y, MGC131997, IBMPFD, TERA, HEL-220, HEL-S-70	valosin containing protein	NM_007126.3		NP_009057.1
GeneID:2189	FANCG	9	35073838	35080016	6178	-	17	NDMM_1::16180, NDMM_1::16181, NDMM_2::15114, NDMM_2::15115, NDMM_3::11587, NDMM_3::11588, LRMM_1::19293, LRMM_1::19294, LRMM_2::18407, LRMM_2::18408, LRMM_3::12078, LRMM_3::12079, LRMM_3::12080, NDMM_4::19556, NDMM_4::19557, LRMM_4::18114, LRMM_4::18115	7952, 144, 7952, 80, 7760, 80, 7952, 144, 7952, 128, 7952, 7408, 80, 8048, 112, 7952, 112	downstream, in gene, downstream, in gene, downstream, in gene, downstream, in gene, downstream, in gene, downstream, downstream, in gene, downstream, in gene, downstream, in gene	1	1	1	1	1	1	1	1	65	46.5	33	72.5	213	42.5	55.5	210	2	LRMM_1	349	Gene FANCG	XRCC9, FANCG, FAG	Fanconi anemia complementation group G	NM_004629.1		NP_004620.1
GeneID:9744	ACAP1	17	7336511	7351478	14967	+	17	NDMM_1::6392, NDMM_1::6393, NDMM_2::5854, NDMM_2::5855, NDMM_3::4708, NDMM_3::4709, LRMM_1::7274, LRMM_2::7101, LRMM_2::7102, LRMM_2::7103, LRMM_3::4824, LRMM_3::4825, NDMM_4::7375, NDMM_4::7376, NDMM_4::7377, NDMM_4::7378, LRMM_4::7253	-7007, 14977, -7007, 161, -7007, 15361, -7007, -6975, 209, 15393, -7007, 15329, -7007, 177, 705, 15329, -7007	upstream, downstream, upstream, in gene, upstream, downstream, upstream, upstream, in gene, downstream, upstream, downstream, upstream, in gene, in gene, downstream, upstream	1	1	1	1	1	1	1	1	87	44	49.667	184	90	103.333	40	209	3	LRMM_4	585	Gene ACAP1	KIAA0050, ACAP1, CENTB1	ArfGAP with coiled-coil, ankyrin repeat and PH domains 1	NM_014716.3, XM_005256878.2, XR_429827.2, XR_243574.2		NP_055531.1
GeneID:116461	TSEN15	1	184051651	184095846	44195	+	8	NDMM_1::1212, NDMM_2::1220, NDMM_3::949, LRMM_1::1541, LRMM_2::1494, LRMM_3::1085, NDMM_4::1319, LRMM_4::1553	-99, -99, -99, 93, 93, 93, -99, -99	upstream, upstream, upstream, in gene, in gene, in gene, upstream, upstream	1	1	1	1	1	1	1	1	49	78	102	154	226	166	91	207	1	LRMM_1	226	Gene TSEN15	sen15, TSEN15, C1orf19	tRNA splicing endonuclease subunit 15	XM_006711148.1, NM_052965.3, NM_001127394.3, NM_001300764.1, NM_001300766.1, NR_023349.2, NR_125335.1, XM_011509139.1		XP_006711211.1, NP_443197.1, NP_001120866.1, NP_001287693.1, NP_001287695.1
GeneID:8517	IKBKG	X	154541204	154568573	27369	+	9	NDMM_1::17092, NDMM_2::16025, NDMM_3::12209, NDMM_3::12210, LRMM_1::20564, LRMM_2::19486, LRMM_3::12744, NDMM_4::20818, LRMM_4::19358	6124, 5948, 5900, 6204, 5948, 5932, 6220, 5964, 5900	in gene, in gene, in gene, in gene, in gene, in gene, in gene, in gene, in gene	1	1	1	1	1	1	1	1	38	31	31	67	117	42	72	207	1	LRMM_4	207	Gene IKBKG	FIP3, IP2, NEMO, IPD2, AMCBX1, IMD33, Fip3p, IP1, FIP-3, IKBKG, IKK-gamma, ZC2HC9, IP	inhibitor of kappa light polypeptide gene enhancer in B-cells, kinase gamma	NM_001099857.2, NM_001099856.3, NM_003639.4, NM_001145255.2, XM_005274760.3, XM_005274761.3, XM_011531203.1, XM_011531204.1, XM_011531205.1, XM_011531206.1, XM_005274764.3, XM_011531207.1		NP_001093327.1, NP_001093326.2, NP_003630.1, NP_001138727.1
GeneID:730227	LINC01136	1	203298758	203305325	6567	-	37	NDMM_1::1283, NDMM_1::1284, NDMM_1::1285, NDMM_1::1286, NDMM_1::1287, NDMM_2::1300, NDMM_2::1301, NDMM_2::1302, NDMM_2::1303, NDMM_3::1017, NDMM_3::1018, NDMM_3::1019, NDMM_3::1020, LRMM_1::1677, LRMM_1::1678, LRMM_1::1679, LRMM_1::1680, LRMM_1::1681, LRMM_1::1682, LRMM_2::1676, LRMM_2::1677, LRMM_2::1678, LRMM_2::1679, LRMM_3::1173, LRMM_3::1174, LRMM_3::1175, LRMM_3::1176, LRMM_3::1177, NDMM_4:…	15693, 14701, 5965, 141, -339, 14701, 5837, 141, -403, 15661, 14861, 5901, -403, 15565, 14829, 6029, 5101, -211, -1203, 15597, 14605, 5901, 141, 15725, 14829, 6029, 141, -403, 15725, 14701, 5965, -211, -6643, 15661, 14701, 5965, 141	downstream, downstream, in gene, in gene, upstream, downstream, in gene, in gene, upstream, downstream, downstream, in gene, upstream, downstream, downstream, in gene, in gene, upstream, upstream, downstream, downstream, in gene, in gene, downstream, downstream, in gene, in gene, upstream, downstream, downstream, in gene, upstream, upstream, downstream, downstream, in gene, in gene	1	1	1	1	1	1	1	1	72	52.2	41.2	178	200.8	156.6	97.8	206	5	LRMM_4	352	Gene LINC01136	RP11-134P9.1, LINC01136	long intergenic non-protein coding RNA 1136	NR_034150.1, NR_034151.1
GeneID:54799	MBTD1	17	51177419	51260493	83074	-	8	NDMM_1::6771, NDMM_2::6238, NDMM_3::5035, LRMM_1::7814, LRMM_2::7577, LRMM_3::5132, NDMM_4::7908, LRMM_4::7775	269, 269, 237, 253, 269, 269, 269, 269	in gene, in gene, in gene, in gene, in gene, in gene, in gene, in gene	1	1	1	1	1	1	1	1	71	92	57	192	263	96	97	206	1	LRMM_1	263	Gene MBTD1	FLJ42067, SA49P01, FLJ20055, MBTD1, MGC126785	mbt domain containing 1	NM_017643.2, XM_011524922.1, XM_011524923.1, XM_011524924.1, XM_011524925.1, XM_011524926.1, XM_011524927.1, XM_011524928.1, XM_011524929.1, XM_011524930.1, XM_005257467.3, XM_005257468.3, XR_934491.1, XM_011524931.1, XM_011524932.1, XM_011524933.1, XR_93		NP_060113.2
GeneID:51096	UTP18	17	51260536	51297933	37397	+	8	NDMM_1::6771, NDMM_2::6238, NDMM_3::5035, LRMM_1::7814, LRMM_2::7577, LRMM_3::5132, NDMM_4::7908, LRMM_4::7775	-312, -312, -280, -296, -312, -312, -312, -312	upstream, upstream, upstream, upstream, upstream, upstream, upstream, upstream	1	1	1	1	1	1	1	1	71	92	57	192	263	96	97	206	1	LRMM_1	263	Gene UTP18	CGI-48, UTP18, WDR50		NM_016001.2, XM_006721930.2, XM_011524870.1		NP_057085.2
GeneID:55571	CNOT11	2	101252883	101270316	17433	+	8	NDMM_1::8780, NDMM_2::8156, NDMM_3::6326, LRMM_1::10252, LRMM_2::9749, LRMM_3::6622, NDMM_4::10466, LRMM_4::10282	45, 45, 333, 333, 13, 365, 13, 45	in gene, in gene, in gene, in gene, in gene, in gene, in gene, in gene	1	1	1	1	1	1	1	1	104	112	71	135	326	121	80	206	1	LRMM_1	326	Gene CNOT11	C40, CNOT11, C2orf29		NM_017546.4		NP_060016.3
GeneID:105373511	LOC105373511	2	101260816	101266670	5854	-	8	NDMM_1::8780, NDMM_2::8156, NDMM_3::6326, LRMM_1::10252, LRMM_2::9749, LRMM_3::6622, NDMM_4::10466, LRMM_4::10282	13742, 13742, 13454, 13454, 13774, 13422, 13774, 13742	downstream, downstream, downstream, downstream, downstream, downstream, downstream, downstream	1	1	1	1	1	1	1	1	104	112	71	135	326	121	80	206	1	LRMM_1	326	Gene LOC105373511		uncharacterized LOC105373511	XR_923108.1
GeneID:23335	WDR7	18	56651343	57029805	378462	+	9	NDMM_1::7239, NDMM_2::6725, NDMM_3::5366, LRMM_1::8435, LRMM_2::8177, LRMM_3::5511, NDMM_4::8518, LRMM_4::8445, NDMM_2::6726	1, -15, 81, 81, 81, 81, -15, -15, 353489	in gene, upstream, in gene, in gene, in gene, in gene, upstream, upstream, in gene	1	1	1	1	1	1	1	1	42	54	33.5	76	95.5	63	39.5	206	2	LRMM_4	206	Gene WDR7	WDR7, KIAA0541, TRAG	WD repeat domain 7	NM_015285.2, NM_052834.2, XM_006722431.1, XM_011525888.1, XM_005266674.2		NP_056100.2, NP_443066.2, XP_006722494.1
GeneID:9898	UBAP2L	1	154219951	154271510	51559	+	20	NDMM_1::964, NDMM_1::965, NDMM_2::950, NDMM_2::951, NDMM_2::952, NDMM_3::744, NDMM_3::745, LRMM_1::1123, LRMM_1::1124, LRMM_2::1088, LRMM_2::1089, LRMM_2::1090, LRMM_3::806, LRMM_3::807, LRMM_3::808, NDMM_4::979, NDMM_4::980, LRMM_4::1171, LRMM_4::1172, LRMM_4::1173	497, 52561, 561, 1457, 52561, 465, 52497, 561, 52529, 561, 1489, 52657, 369, 1329, 52561, 561, 52561, 561, 1425, 52561	in gene, downstream, in gene, in gene, downstream, in gene, downstream, in gene, downstream, in gene, in gene, downstream, in gene, in gene, downstream, in gene, downstream, in gene, in gene, downstream	1	1	1	1	1	1	1	1	66	70	51	122	245.5	129	66.5	204.5	2	LRMM_4	291	Gene UBAP2L	FLJ42300, UBAP2L, NICE-4, KIAA0144, NICE4	ubiquitin associated protein 2 like	NM_014847.3, XM_005245674.1, NM_001287815.1, NM_001287816.1, NM_001127320.2, XM_005245658.2, XM_011510212.1, XM_011510213.1, XM_011510214.1, XM_011510215.1, XM_011510216.1, XM_006711684.2, XM_006711685.2, XM_011510217.1, XM_005245667.2, XM_005245668.2, XM		NP_055662.3, XP_005245731.1, NP_001274744.1, NP_001274745.1, NP_001120792.1
GeneID:81627	TRMT1L	1	185118085	185157098	39013	-	8	NDMM_1::1216, NDMM_2::1226, NDMM_3::954, LRMM_1::1561, LRMM_2::1510, LRMM_3::1089, NDMM_4::1325, LRMM_4::1560	-118, -246, -278, 202, -246, -182, 10, 42	upstream, upstream, upstream, in gene, upstream, upstream, in gene, in gene	1	1	1	1	1	1	1	1	95	90	74	153	259	209	143	204	1	LRMM_1	259	Gene TRMT1L	C1orf25, bG120K12.3, MSTP070, MST070, MGC25112, MGC57134, TRM1L, TRMT1L	tRNA methyltransferase 1 like	NM_030934.4, NM_001202423.1, XM_011510027.1, XM_011510028.1		NP_112196.3, NP_001189352.1
GeneID:5929	RBBP5	1	205086142	205122022	35880	-	8	NDMM_1::1308, NDMM_2::1323, NDMM_3::1030, LRMM_1::1713, LRMM_2::1701, LRMM_3::1196, NDMM_4::1473, LRMM_4::1687	-202, -186, -186, -154, -218, -186, -218, -186	upstream, upstream, upstream, upstream, upstream, upstream, upstream, upstream	1	1	1	1	1	1	1	1	79	81	51	195	201	158	120	203	1	LRMM_4	203	Gene RBBP5	RBBP5, RBQ3, SWD1	retinoblastoma binding protein 5	NM_005057.3, NM_001193272.1, NM_001193273.1, XM_005245398.2, XM_011509833.1, XM_005245401.2, XM_011509834.1, XM_006711477.2		NP_005048.2, NP_001180201.1, NP_001180202.1
GeneID:84844	PHF5A	22	41459717	41468704	8987	-	8	NDMM_1::10331, NDMM_2::9739, NDMM_3::7494, LRMM_1::12385, LRMM_2::11610, LRMM_3::7919, NDMM_4::12618, LRMM_4::12052	-272, -160, -272, -256, -256, -160, -256, -160	upstream, upstream, upstream, upstream, upstream, upstream, upstream, upstream	1	1	1	1	1	1	1	1	124	120	68	206	293	126	86	203	1	LRMM_1	293	Gene PHF5A	SF3B7, bK223H9.2, MGC1346, SAP14b, SF3b14b, Rds3, PHF5A, INI	PHD finger protein 5A	NM_032758.3		NP_116147.1
GeneID:50	ACO2	22	41469125	41528989	59864	+	8	NDMM_1::10331, NDMM_2::9739, NDMM_3::7494, LRMM_1::12385, LRMM_2::11610, LRMM_3::7919, NDMM_4::12618, LRMM_4::12052	-149, -261, -149, -165, -165, -261, -165, -261	upstream, upstream, upstream, upstream, upstream, upstream, upstream, upstream	1	1	1	1	1	1	1	1	124	120	68	206	293	126	86	203	1	LRMM_1	293	Gene ACO2	OPA9, ACONM, ACO2, MGC20605, MGC33908, ICRD, OCA8, HEL-S-284	aconitase 2	NM_001098.2		NP_001089.1
GeneID:105369160	LOC105369160	22	41469188	41488965	19777	+	8	NDMM_1::10331, NDMM_2::9739, NDMM_3::7494, LRMM_1::12385, LRMM_2::11610, LRMM_3::7919, NDMM_4::12618, LRMM_4::12052	-212, -324, -212, -228, -228, -324, -228, -324	upstream, upstream, upstream, upstream, upstream, upstream, upstream, upstream	1	1	1	1	1	1	1	1	124	120	68	206	293	126	86	203	1	LRMM_1	293	Gene LOC105369160		uncharacterized LOC105369160	XR_921056.1, XR_938275.1
GeneID:60560	NAA35	9	85941142	86025462	84320	+	8	NDMM_1::16314, NDMM_2::15248, NDMM_3::11685, LRMM_1::19478, LRMM_2::18539, LRMM_3::12179, NDMM_4::19720, LRMM_4::18263	266, 266, 202, 202, 202, 202, 10, 138	in gene, in gene, in gene, in gene, in gene, in gene, in gene, in gene	1	1	1	1	1	1	1	1	90	78	60	95	192	85	74	203	1	LRMM_4	203	Gene NAA35	NAA35, MAK10, FLJ21613, bA379P1.1, MAK10P, FLJ22643, EGAP	N(alpha)-acetyltransferase 35, NatC auxiliary subunit	NM_024635.3, XM_011518902.1, XM_005252126.2, XM_005252127.2, XM_011518903.1, XM_011518904.1, XM_005252128.3		NP_078911.3
GeneID:11325	DDX42	17	63773884	63819317	45433	+	17	NDMM_1::6851, NDMM_1::6852, NDMM_2::6316, NDMM_2::6317, NDMM_3::5084, NDMM_3::5085, LRMM_1::7898, LRMM_1::7899, LRMM_2::7690, LRMM_2::7691, LRMM_3::5194, LRMM_3::5195, LRMM_3::5196, NDMM_4::7997, NDMM_4::7998, LRMM_4::7896, LRMM_4::7897	36, 53604, 36, 53620, -60, 53636, 36, 53444, 20, 53284, 36, 53380, 53636, -60, 53348, 36, 53636	in gene, downstream, in gene, downstream, upstream, downstream, in gene, downstream, in gene, downstream, in gene, downstream, downstream, upstream, downstream, in gene, downstream	1	1	1	1	1	1	1	1	63	46.5	45	92.5	203	61.5	50	203	2	LRMM_1	253	Gene DDX42	RHELP, FLJ43179, RNAHP, SF3B8, DDX42, SF3b125, DDX42P	DEAD-box helicase 42	NM_007372.3, NM_203499.2, XM_006721657.1, XM_011524259.1		NP_031398.2, NP_987095.1, XP_006721720.1
GeneID:51651	PTRH2	17	59697306	59707495	10189	-	8	NDMM_1::6827, NDMM_2::6286, NDMM_3::5061, LRMM_1::7864, LRMM_2::7652, LRMM_3::5169, NDMM_4::7962, LRMM_4::7848	-185, -142, -185, -185, -25, -153, -25, -25	upstream, upstream, upstream, upstream, upstream, upstream, upstream, upstream	1	1	1	1	1	1	1	1	26	34	24	63	86	43	32	203	1	LRMM_4	203	Gene PTRH2	PTH, CGI-147, PTH2, PTRH2, BIT1, IMNEPD, CFAP37, 2, FLJ32471	peptidyl-tRNA hydrolase 2	NM_016077.3, XM_011524886.1, XM_011524887.1		NP_057161.1
GeneID:9404	LPXN	11	58526871	58578892	52021	-	9	NDMM_1::2549, NDMM_2::2569, NDMM_3::2017, LRMM_1::3202, LRMM_2::3121, LRMM_3::2094, LRMM_3::2095, NDMM_4::3032, LRMM_4::3092	620, 332, 908, 76, 972, 652, 12, 812, 812	in gene, in gene, in gene, in gene, in gene, in gene, in gene, in gene, in gene	1	1	1	1	1	1	1	1	158	75	58	150	273	80	73	202	1	LRMM_1	273	Gene LPXN	LPXN, LDPL	leupaxin	NM_004811.2, NM_001143995.1, XM_006718750.1, XM_011545388.1, XM_011545389.1, XM_011545390.1, XM_011545391.1, XM_011545392.1, XM_011545393.1, XM_011545394.1		NP_004802.1, NP_001137467.1, XP_006718813.1
GeneID:220002	CYB561A3	11	61348748	61362299	13551	-	8	NDMM_1::2569, NDMM_2::2594, NDMM_3::2032, LRMM_1::3237, LRMM_2::3139, LRMM_3::2111, NDMM_4::3063, LRMM_4::3119	171, 267, 299, 155, 283, 267, 267, 251	in gene, in gene, in gene, in gene, in gene, in gene, in gene, in gene	1	1	1	1	1	1	1	1	81	52	30	87	136	66	54	202	1	LRMM_4	202	Gene CYB561A3	CYBASC3, FLJ39724, CYB561A3, LCYTB, MGC20446		NM_153611.4, NM_001161454.1, NM_001161452.1, NM_001300763.1, XM_011544821.1, XM_011544822.1, XM_011544823.1, XM_011544824.1, XR_949828.1, XM_011544825.1		NP_705839.3, NP_001154926.1, NP_001154924.1, NP_001287692.1
GeneID:84717	HDGFRP2	19	4472196	4502220	30024	+	8	NDMM_1::7416, NDMM_2::6868, NDMM_3::5470, LRMM_1::8642, LRMM_2::8365, LRMM_3::5643, NDMM_4::8747, LRMM_4::8659	-324, -260, -292, -260, -260, -260, -260, -292	upstream, upstream, upstream, upstream, upstream, upstream, upstream, upstream	1	1	1	1	1	1	1	1	103	75	48	192	292	68	43	202	1	LRMM_1	292	Gene HDGFRP2	HDGF2, MGC2641	hepatoma-derived growth factor-related protein 2	NM_001001520.2, NM_032631.3, XM_011528375.1, XM_011528376.1, XM_011528377.1		NP_001001520.1, NP_116020.1
GeneID:3032	HADHB	2	26244748	26290465	45717	+	8	NDMM_1::8266, NDMM_2::7650, NDMM_3::5939, LRMM_1::9642, LRMM_2::9178, LRMM_3::6214, NDMM_4::9840, LRMM_4::9680	20, 52, 4, -12, -12, -12, -12, 20	in gene, in gene, in gene, upstream, upstream, upstream, upstream, in gene	1	1	1	1	1	1	1	1	101	124	82	198	259	153	111	201	1	LRMM_1	259	Gene HADHB	MGC87480, ECHB, HADHB, MTPB, TP-BETA, MSTP029	hydroxyacyl-CoA dehydrogenase/3-ketoacyl-CoA thiolase/enoyl-CoA hydratase (trifunctional protein), beta subunit	NM_000183.2, NM_001281512.1, NM_001281513.1, XM_011532803.1, XM_011532804.1		NP_000174.1, NP_001268441.1, NP_001268442.1
GeneID:79969	ATAT1	6	30626836	30646823	19987	+	22	NDMM_1::13567, NDMM_1::13568, NDMM_1::13569, NDMM_2::12845, NDMM_2::12846, NDMM_2::12847, NDMM_3::9708, NDMM_3::9709, NDMM_3::9710, LRMM_1::15928, LRMM_1::15929, LRMM_1::15930, LRMM_2::15622, LRMM_2::15623, LRMM_3::10220, LRMM_3::10221, NDMM_4::16338, NDMM_4::16339, NDMM_4::16340, LRMM_4::15478, LRMM_4::15479, LRMM_4::15480	-9172, -148, 20460, -9172, -148, 20668, -9236, -84, 20780, -9236, -84, 20588, -9172, 20748, -9236, 20748, -9172, -132, 20716, -9236, -84, 20748	upstream, upstream, downstream, upstream, upstream, downstream, upstream, upstream, downstream, upstream, upstream, downstream, upstream, downstream, upstream, downstream, upstream, upstream, downstream, upstream, upstream, downstream	1	1	1	1	1	1	1	1	104.333	79.667	72	128	153	94.333	82.333	201	3	LRMM_4	490	Gene ATAT1	MEC17, FLJ13158, Nbla00487, DKFZp547J097, C6orf134, ATAT1, TAT	alpha tubulin acetyltransferase 1	NM_024909.2, NM_001031722.2, NM_001254952.1, XM_005249414.1, XM_005249415.1, XM_005249416.1, XM_005249417.1, XM_005249418.1, XM_005249419.1, XM_005249420.1, XR_241917.1, XM_005272895.1, XM_005272896.1, XM_005272897.1, XM_005272898.1, XM_005272899.1, XM_00		NP_079185.2, NP_001026892.1, NP_001241881.1, XP_005249471.1, XP_005249472.1, XP_005249473.1, XP_005249474.1, XP_005249475.1, XP_005249476.1, XP_005249477.1, XP_005272952.1, XP_005272953.1, XP_005272954.1, XP_005272955.1, XP_005272956.1, XP_005272957.1, XP
GeneID:28973	MRPS18B	6	30617320	30626397	9077	+	16	NDMM_1::13567, NDMM_1::13568, NDMM_2::12845, NDMM_2::12846, NDMM_3::9708, NDMM_3::9709, LRMM_1::15927, LRMM_1::15928, LRMM_1::15929, LRMM_2::15622, LRMM_3::10220, NDMM_4::16337, NDMM_4::16338, NDMM_4::16339, LRMM_4::15478, LRMM_4::15479	344, 9368, 344, 9368, 280, 9432, -2344, 280, 9432, 344, 280, -2344, 344, 9384, 280, 9432	in gene, downstream, in gene, downstream, in gene, downstream, upstream, in gene, downstream, in gene, in gene, upstream, in gene, downstream, in gene, downstream	1	1	1	1	1	1	1	1	110.333	78.667	70.333	135.333	149.333	98.667	82	200.667	3	LRMM_4	490	Gene MRPS18B	MRPS18B, HSPC183, PTD017, S18amt, MRPS18-2, C6orf14, DKFZp564H0223, MRP-S18-2, HumanS18a	mitochondrial ribosomal protein S18B	NM_014046.3, XM_005249030.2, XM_005272798.2, XM_005274944.2, XM_005275098.2, XM_005275236.2, XM_005275374.2, XM_005275534.2		NP_054765.1
GeneID:105371852	LOC105371852	17	62075464	62077280	1816	-	8	NDMM_1::6840, NDMM_2::6303, NDMM_3::5076, LRMM_1::7887, LRMM_2::7677, LRMM_3::5185, NDMM_4::7983, LRMM_4::7879	11488, 11424, 11456, 11424, 11424, 11408, 11392, 11392	downstream, downstream, downstream, downstream, downstream, downstream, downstream, downstream	1	1	1	1	1	1	1	1	48	27	24	62	132	39	33	200	1	LRMM_4	200	Gene LOC105371852		uncharacterized LOC105371852	XR_918533.1, XR_934895.1
GeneID:105371622	LOC105371622	1	174992545	174999352	6807	-	18	NDMM_1::1159, NDMM_1::1160, NDMM_2::1167, NDMM_2::1168, NDMM_3::902, NDMM_3::903, LRMM_1::1455, LRMM_1::1456, LRMM_2::1412, LRMM_2::1413, LRMM_2::1414, LRMM_3::1018, LRMM_3::1019, LRMM_3::1020, NDMM_4::1249, NDMM_4::1250, LRMM_4::1469, LRMM_4::1470	8664, -72, 8696, -152, 8712, -232, 8696, -168, 8696, -168, -680, 8696, -168, -680, 8696, -168, 8696, -168	downstream, upstream, downstream, upstream, downstream, upstream, downstream, upstream, downstream, upstream, upstream, downstream, upstream, upstream, downstream, upstream, downstream, upstream	1	1	1	1	1	1	1	1	79.5	92.5	45.5	169.5	413.5	116.5	75.5	199.5	2	LRMM_1	720	Gene LOC105371622		uncharacterized LOC105371622	XR_918090.1, XR_922296.1
GeneID:27101	CACYBP	1	174999435	175012027	12592	+	18	NDMM_1::1159, NDMM_1::1160, NDMM_2::1167, NDMM_2::1168, NDMM_3::902, NDMM_3::903, LRMM_1::1455, LRMM_1::1456, LRMM_2::1412, LRMM_2::1413, LRMM_2::1414, LRMM_3::1018, LRMM_3::1019, LRMM_3::1020, NDMM_4::1249, NDMM_4::1250, LRMM_4::1469, LRMM_4::1470	-8747, -11, -8779, 69, -8795, 149, -8779, 85, -8779, 85, 597, -8779, 85, 597, -8779, 85, -8779, 85	upstream, upstream, upstream, in gene, upstream, in gene, upstream, in gene, upstream, in gene, in gene, upstream, in gene, in gene, upstream, in gene, upstream, in gene	1	1	1	1	1	1	1	1	79.5	92.5	45.5	169.5	413.5	116.5	75.5	199.5	2	LRMM_1	720	Gene CACYBP	MGC87971, GIG5, SIP, PNAS-107, RP1-102G20.6, CACYBP, S100A6BP	calcyclin binding protein	NM_014412.2, NM_001007214.1		NP_055227.1, NP_001007215.1
GeneID:143684	FAM76B	11	95768942	95790396	21454	-	11	NDMM_1::2929, NDMM_2::2898, NDMM_3::2258, NDMM_3::2259, LRMM_1::3663, LRMM_2::3525, LRMM_3::2370, LRMM_3::2371, NDMM_4::3457, NDMM_4::3458, LRMM_4::3527	-100, 828, 796, 92, 764, 796, 748, 76, 764, -100, 764	upstream, in gene, in gene, in gene, in gene, in gene, in gene, in gene, in gene, upstream, in gene	1	1	1	1	1	1	1	1	110	92	77	152	272	93	72	199	1	LRMM_1	272	Gene FAM76B	MGC33371, FAM76B	family with sequence similarity 76 member B	NM_144664.4, XM_005273775.3, XM_005273776.3, XM_011542610.1, XM_011542611.1, XM_011542612.1, XM_011542613.1, XR_947794.1, XR_247187.3, XM_005273777.3		NP_653265.3
GeneID:55833	UBAP2	9	33921693	34048949	127256	-	18	NDMM_1::16167, NDMM_1::16168, NDMM_1::16169, NDMM_2::15105, NDMM_2::15106, NDMM_3::11578, NDMM_3::11579, NDMM_3::11580, LRMM_1::19272, LRMM_1::19273, LRMM_2::18398, LRMM_2::18399, LRMM_3::12069, LRMM_3::12070, NDMM_4::19541, NDMM_4::19542, LRMM_4::18091, LRMM_4::18092	60405, 405, -139, 60277, -139, 60453, 437, -411, 60405, -171, 60437, -395, 60421, -363, 60373, -139, 60405, -139	in gene, in gene, upstream, in gene, upstream, in gene, in gene, upstream, in gene, upstream, in gene, upstream, in gene, upstream, in gene, upstream, in gene, upstream	1	1	1	1	1	1	1	1	90	56	43.5	109	169	48	36.5	198.5	2	LRMM_4	327	Gene UBAP2	KIAA1491, UBAP2, bA176F3.5, FLJ22435, UBAP-2, FLJ46567, FLJ43947	ubiquitin associated protein 2	NM_018449.3, NM_001282529.1, NM_001282530.1		NP_060919.3, NP_001269458.1, NP_001269459.1
GeneID:55958	KLHL9	9	21331019	21335430	4411	-	8	NDMM_1::16108, NDMM_2::15060, NDMM_3::11545, LRMM_1::19195, LRMM_2::18345, LRMM_3::12029, NDMM_4::19473, LRMM_4::18007	134, 166, 150, 166, 102, 166, 150, 166	in gene, in gene, in gene, in gene, in gene, in gene, in gene, in gene	1	1	1	1	1	1	1	1	77	68	52	63	109	39	52	198	1	LRMM_4	198	Gene KLHL9	KLHL9, FLJ21815	kelch like family member 9	NM_018847.2		NP_061335.1
GeneID:55035	NOL8	9	92297358	92325994	28636	-	16	NDMM_1::16348, NDMM_1::16349, NDMM_2::15278, NDMM_2::15279, NDMM_3::11700, NDMM_3::11701, LRMM_1::19526, LRMM_1::19527, LRMM_2::18576, LRMM_2::18577, LRMM_3::12207, LRMM_3::12208, NDMM_4::19761, NDMM_4::19762, LRMM_4::18304, LRMM_4::18305	32170, 234, 32234, 266, 32170, 234, 32218, 234, 32266, 266, 32106, 234, 32234, 234, 32234, 234	downstream, in gene, downstream, in gene, downstream, in gene, downstream, in gene, downstream, in gene, downstream, in gene, downstream, in gene, downstream, in gene	1	1	1	1	1	1	1	1	78.5	90.5	64.5	160.5	199	61	45	197.5	2	LRMM_1	233	Gene NOL8	Nop132, DKFZp686P12242, FLJ20736, C9orf34, NOL8, bA62C3.3, bA62C3.4, NOP132	nucleolar protein 8	NM_017948.5, NM_001256394.1, NR_046106.1, XM_006717166.2, XM_006717167.2, XM_006717168.2, XM_006717169.2, XM_006717170.2, XM_011518824.1, XM_011518825.1, XM_011518826.1, XM_006717172.2, XM_006717173.2, XM_011518827.1, XM_011518828.1, XR_929816.1		NP_060418.4, NP_001243323.1
GeneID:101928550	SMC2-AS1	9	104080024	104092474	12450	-	8	NDMM_1::16426, NDMM_2::15356, NDMM_3::11756, LRMM_1::19663, LRMM_2::18689, LRMM_3::12263, NDMM_4::19873, LRMM_4::18411	-1670, -1590, -1606, -1606, -1606, -1670, -1670, -1638	upstream, upstream, upstream, upstream, upstream, upstream, upstream, upstream	1	1	1	1	1	1	1	1	118	110	74	238	237	115	80	196	1	NDMM_4	238	Gene SMC2-AS1	RP11-82L2.1, SMC2-AS1	SMC2 antisense RNA 1 (head to head)	NR_121580.1
GeneID:10592	SMC2	9	104093848	104141419	47571	+	8	NDMM_1::16426, NDMM_2::15356, NDMM_3::11756, LRMM_1::19663, LRMM_2::18689, LRMM_3::12263, NDMM_4::19873, LRMM_4::18411	296, 216, 232, 232, 232, 296, 296, 264	in gene, in gene, in gene, in gene, in gene, in gene, in gene, in gene	1	1	1	1	1	1	1	1	118	110	74	238	237	115	80	196	1	NDMM_4	238	Gene SMC2	hCAP-E, FLJ10093, SMC2L1, CAPE, SMC2, CAP-E	structural maintenance of chromosomes 2	NM_006444.2, NM_001042550.1, NM_001042551.1, NM_001265602.1, XM_006716933.2, XM_011518148.1, XM_011518149.1, XM_011518150.1, XM_011518151.1, XM_011518152.1, XM_011518153.1, XM_011518154.1		NP_006435.2, NP_001036015.1, NP_001036016.1, NP_001252531.1
GeneID:283416	LINC01465	12	62601751	62603434	1683	-	8	NDMM_1::3548, NDMM_2::3601, NDMM_3::2751, LRMM_1::4371, LRMM_2::4250, LRMM_3::2872, NDMM_4::4286, LRMM_4::4315	330, 458, 458, 458, 330, 586, 330, 330	in gene, in gene, in gene, in gene, in gene, in gene, in gene, in gene	1	1	1	1	1	1	1	1	103	96	60	166	267	129	77	196	1	LRMM_1	267	Gene LINC01465	LINC01465, FLJ25590, C12orf61	long intergenic non-protein coding RNA 1465	NR_121682.1
GeneID:406891	MIRLET7I	12	62603686	62603769	83	+	8	NDMM_1::3548, NDMM_2::3601, NDMM_3::2751, LRMM_1::4371, LRMM_2::4250, LRMM_3::2872, NDMM_4::4286, LRMM_4::4315	-582, -710, -710, -710, -582, -838, -582, -582	upstream, upstream, upstream, upstream, upstream, upstream, upstream, upstream	1	1	1	1	1	1	1	1	103	96	60	166	267	129	77	196	1	LRMM_1	267	Gene MIRLET7I	MIRLET7I, hsa-let-7i, let-7i, LET7I, MIRNLET7I	microRNA let-7i
GeneID:6902	TBCA	5	77691169	77776361	85192	-	8	NDMM_1::12614, NDMM_2::11986, NDMM_3::9110, LRMM_1::14948, LRMM_2::14561, LRMM_3::9574, NDMM_4::15273, LRMM_4::14411	265, 233, 105, 105, 137, 265, 105, 105	in gene, in gene, in gene, in gene, in gene, in gene, in gene, in gene	1	1	1	1	1	1	1	1	116	77	56	105	187	166	73	196	1	LRMM_4	196	Gene TBCA	TBCA		NM_004607.2, NM_001297738.1, NM_001297740.1		NP_004598.1, NP_001284667.1, NP_001284669.1
GeneID:105379045	LOC105379045	5	77772649	77776194	3545	-	8	NDMM_1::12614, NDMM_2::11986, NDMM_3::9110, LRMM_1::14948, LRMM_2::14561, LRMM_3::9574, NDMM_4::15273, LRMM_4::14411	98, 66, -62, -62, -30, 98, -62, -62	in gene, in gene, upstream, upstream, upstream, in gene, upstream, upstream	1	1	1	1	1	1	1	1	116	77	56	105	187	166	73	196	1	LRMM_4	196	Gene LOC105379045		uncharacterized LOC105379045	XM_011549002.1, XM_011543774.1
GeneID:101928448	C5orf67	5	56511394	56606232	94838	-	12	NDMM_1::12492, NDMM_2::11869, NDMM_2::11870, NDMM_2::11871, NDMM_3::9025, LRMM_1::14802, LRMM_2::14424, LRMM_3::9505, NDMM_4::15157, LRMM_4::14284, LRMM_4::14285, LRMM_4::14286	17080, 25048, 17080, 16216, 17080, 17080, 17080, 17080, 17080, 103976, 25048, 17080	in gene, in gene, in gene, in gene, in gene, in gene, in gene, in gene, in gene, downstream, in gene, in gene	1	1	1	1	1	1	1	1	60.333	47.333	49.333	189	112.333	101	46.333	196	3	LRMM_4	531	Gene C5orf67	C5orf67	chromosome 5 open reading frame 67	NM_001287053.1		NP_001273982.1
GeneID:5635	PRPSAP1	17	76310787	76354149	43362	-	7	NDMM_1::6965, NDMM_2::6429, LRMM_1::8058, LRMM_2::7826, LRMM_3::5275, NDMM_4::8149, LRMM_4::8099	133, 165, 133, 133, 133, 133, 133	in gene, in gene, in gene, in gene, in gene, in gene, in gene	1	1	0	1	1	1	1	1	48	40	14	79	127	49	21	196	1	LRMM_4	196	Gene PRPSAP1	PRPSAP1, PAP39	phosphoribosyl pyrophosphate synthetase-associated protein 1	NM_002766.2, XR_934506.1, XM_011525034.1		NP_002757.2
GeneID:79177	ZNF576	19	43596392	43600435	4043	+	8	NDMM_1::7911, NDMM_2::7306, NDMM_3::5727, LRMM_1::9231, LRMM_2::8812, LRMM_3::5951, NDMM_4::9393, LRMM_4::9246	24, 24, 24, 24, 24, 24, 24, -168	in gene, in gene, in gene, in gene, in gene, in gene, in gene, upstream	1	1	1	1	1	1	1	1	131	127	72	202	152	94	101	195	1	NDMM_4	202	Gene ZNF576	FLJ22700, MGC2508, ZNF576, FLJ56397	zinc finger protein 576	NM_024327.2, NM_001145347.1		NP_077303.1, NP_001138819.1
GeneID:85391	SNORD14E	11	123058077	123058156	79	-	9	NDMM_1::3130, NDMM_2::3056, NDMM_3::2378, LRMM_1::3843, LRMM_2::3683, LRMM_3::2489, LRMM_3::2490, NDMM_4::3633, LRMM_4::3721	-4500, -4692, -4692, -4308, -4596, -4356, -5300, -4308, -4180	upstream, upstream, upstream, upstream, upstream, upstream, upstream, upstream, upstream	1	1	1	1	1	1	1	1	83	65	45	156	246	79	62	195	1	LRMM_1	246	Gene SNORD14E	SNORD14E	small nucleolar RNA, C/D box 14E	NR_003125.2
GeneID:85390	SNORD14D	11	123058909	123058995	86	-	9	NDMM_1::3130, NDMM_2::3056, NDMM_3::2378, LRMM_1::3843, LRMM_2::3683, LRMM_3::2489, LRMM_3::2490, NDMM_4::3633, LRMM_4::3721	-3661, -3853, -3853, -3469, -3757, -3517, -4461, -3469, -3341	upstream, upstream, upstream, upstream, upstream, upstream, upstream, upstream, upstream	1	1	1	1	1	1	1	1	83	65	45	156	246	79	62	195	1	LRMM_1	246	Gene SNORD14D	SNORD14D	small nucleolar RNA, C/D box 14D	NR_001454.2
GeneID:100506779	BZRAP1-AS1	17	58325450	58353727	28277	+	33	NDMM_1::6811, NDMM_1::6812, NDMM_1::6813, NDMM_2::6267, NDMM_2::6268, NDMM_2::6269, NDMM_3::5048, NDMM_3::5049, NDMM_3::5050, LRMM_1::7843, LRMM_1::7844, LRMM_1::7845, LRMM_1::7846, LRMM_2::7627, LRMM_2::7628, LRMM_2::7629, LRMM_2::7630, LRMM_3::5156, LRMM_3::5157, NDMM_4::7943, NDMM_4::7944, NDMM_4::7945, NDMM_4::7946, NDMM_4::7947, LRMM_4::7819, LRMM_4::7820, LRMM_4::7821, LRMM_4::7822, LRMM_4:…	12534, 18998, 26870, 12566, 19014, 26998, 12566, 18998, 26998, 6454, 6934, 12566, 26934, 10646, 12438, 18998, 26998, 18998, 27030, 7030, 10646, 12598, 18998, 26966, -7690, -6122, 4150, 7062, 7542, 10646, 12598, 18998, 26934	in gene, in gene, in gene, in gene, in gene, in gene, in gene, in gene, in gene, in gene, in gene, in gene, in gene, in gene, in gene, in gene, in gene, in gene, in gene, in gene, in gene, in gene, in gene, in gene, upstream, upstream, in gene, in gene, in gene, in gene, in gene, in gene, in gene	1	1	1	1	1	1	1	1	34.7	36.4	31.4	61.6	73.8	63.4	17.6	194.9	10	LRMM_4	462	Gene BZRAP1-AS1	BZRAP1-AS1, RP5-1171I10.4	BZRAP1 antisense RNA 1	NR_038415.1, NR_038418.1, NR_038416.1, NR_038417.1, NR_038413.1, NR_038411.1, NR_038412.1, NR_038410.1, NR_038414.1
GeneID:105372301	LOC105372301	19	19060831	19063511	2680	-	8	NDMM_1::7688, NDMM_2::7105, NDMM_3::5600, LRMM_1::8994, LRMM_2::8614, LRMM_3::5802, NDMM_4::9115, LRMM_4::8983	-297, -457, -297, -297, -297, -297, -297, -297	upstream, upstream, upstream, upstream, upstream, upstream, upstream, upstream	1	1	1	1	1	1	1	1	60	61	36	126	140	55	68	194	1	LRMM_4	194	Gene LOC105372301		uncharacterized LOC105372301	XR_919425.1, XR_919426.1, XR_936368.1, XR_936369.1
GeneID:83875	BCO2	11	112175485	112218929	43444	+	8	NDMM_1::3040, NDMM_2::2981, NDMM_3::2327, LRMM_1::3760, LRMM_2::3608, LRMM_3::2434, NDMM_4::3556, LRMM_4::3627	50851, 50851, 50787, 51011, 50851, 50851, 51011, 51011	downstream, downstream, downstream, downstream, downstream, downstream, downstream, downstream	1	1	1	1	1	1	1	1	128	79	66	126	174	139	46	194	1	LRMM_4	194	Gene BCO2	FLJ34464, BCDO2, BCO2, B-DIOX-II	beta-carotene oxygenase 2	NM_001037290.2, NM_001256397.1, NM_001256398.1, NM_001256400.1, NM_031938.5		NP_001032367.2, NP_001243326.1, NP_001243327.1, NP_001243329.1, NP_114144.4
GeneID:5805	PTS	11	112226365	112233973	7608	+	8	NDMM_1::3040, NDMM_2::2981, NDMM_3::2327, LRMM_1::3760, LRMM_2::3608, LRMM_3::2434, NDMM_4::3556, LRMM_4::3627	-29, -29, -93, 131, -29, -29, 131, 131	upstream, upstream, upstream, in gene, upstream, upstream, in gene, in gene	1	1	1	1	1	1	1	1	128	79	66	126	174	139	46	194	1	LRMM_4	194	Gene PTS	PTS, PTPS, FLJ97081	6-pyruvoyltetrahydropterin synthase	NM_000317.2, XM_011542943.1		NP_000308.1
GeneID:105371614	LOC105371614	1	171773106	171779610	6504	+	8	NDMM_1::1141, NDMM_2::1145, NDMM_3::886, LRMM_1::1427, LRMM_2::1384, LRMM_3::995, NDMM_4::1231, LRMM_4::1441	8270, 8174, 8302, 8270, 8206, 8206, 8366, 8270	downstream, downstream, downstream, downstream, downstream, downstream, downstream, downstream	1	1	1	1	1	1	1	1	58	60	60	82	128	84	35	194	1	LRMM_4	194	Gene LOC105371614		uncharacterized LOC105371614	XR_918076.1, XR_922282.1
GeneID:115350	FCRL1	1	157792249	157820150	27901	-	8	NDMM_1::1031, NDMM_2::1022, NDMM_3::800, LRMM_1::1256, LRMM_2::1219, LRMM_3::886, NDMM_4::1089, LRMM_4::1296	13206, 13206, 13142, 13366, 13206, 13174, 13206, 13206	in gene, in gene, in gene, in gene, in gene, in gene, in gene, in gene	1	1	1	1	1	1	1	1	84	59	38	205	171	161	87	193	1	NDMM_4	205	Gene FCRL1	IFGP1, FCRH1, DKFZp667O1421, FCRL1, CD307a, IRTA5	Fc receptor like 1	NM_052938.4, NM_001159397.1, NM_001159398.1, XM_011509125.1, XM_011509126.1, XM_011509127.1, XM_011509128.1, XM_011509129.1, XM_005244866.2, XM_011509130.1, XR_921738.1, XR_921739.1, XR_921740.1, XM_011509131.1, XM_011509132.1, XM_005244867.2, XM_01150913		NP_443170.1, NP_001152869.1, NP_001152870.1
GeneID:57804	POLD4	11	67350765	67353596	2831	-	8	NDMM_1::2729, NDMM_2::2729, NDMM_3::2147, LRMM_1::3430, LRMM_2::3310, LRMM_3::2229, NDMM_4::3243, LRMM_4::3313	124, 124, 92, 92, 92, 108, 124, 92	in gene, in gene, in gene, in gene, in gene, in gene, in gene, in gene	1	1	1	1	1	1	1	1	117	76	37	126	145	52	61	193	1	LRMM_4	193	Gene POLD4	POLDS, POLD4, p12	polymerase (DNA) delta 4, accessory subunit	NM_001256870.1, NM_021173.4, NR_046411.1, NR_046412.1, NR_046413.1		NP_001243799.1, NP_066996.3
GeneID:6203	RPS9	19	54200557	54207647	7090	+	20	NDMM_1::8076, NDMM_1::8077, NDMM_2::7451, NDMM_2::7452, NDMM_3::5816, NDMM_3::5817, NDMM_3::5818, NDMM_3::5819, LRMM_1::9406, LRMM_1::9407, LRMM_2::8966, LRMM_2::8967, LRMM_3::6069, LRMM_3::6070, LRMM_3::6071, NDMM_4::9608, NDMM_4::9609, NDMM_4::9610, LRMM_4::9454, LRMM_4::9455	-10221, 339, -10189, 403, -10541, -9517, 323, 9139, -10221, 339, -9517, 339, -10189, -9645, 339, -10189, 307, 9267, -10221, 339	upstream, in gene, upstream, in gene, upstream, upstream, in gene, downstream, upstream, in gene, upstream, in gene, upstream, upstream, in gene, upstream, in gene, downstream, upstream, in gene	1	1	1	1	1	1	1	1	110.333	69.333	40	124.333	161.667	50.333	45.333	192.333	3	LRMM_4	429	Gene RPS9	RPS9, S9		NM_001013.3, XM_005277274.1, XR_254517.1, XM_005278287.3, XM_005278288.2, XR_430207.2, XR_254518.3, XM_005277084.3, XM_005277085.2, XR_431090.2, XR_254260.2, XM_005277315.2, XR_431025.2, XR_431057.2, XR_431058.2, XM_006725965.2, XM_011547789.1, XR_952764.		NP_001004.2, XP_005277331.1
GeneID:10944	C11orf58	11	16738601	16758354	19753	+	8	NDMM_1::2373, NDMM_2::2407, NDMM_3::1908, LRMM_1::3013, LRMM_2::2955, LRMM_3::1983, NDMM_4::2840, LRMM_4::2904	55, 55, 247, 119, 151, 247, 55, 119	in gene, in gene, in gene, in gene, in gene, in gene, in gene, in gene	1	1	1	1	1	1	1	1	131	70	51	114	275	109	78	192	1	LRMM_1	275	Gene C11orf58	IMAGE145052, C11orf58, SMAP, DKFZp686N0232, MGC117265	chromosome 11 open reading frame 58	NM_014267.5, XM_011519860.1, XM_011519861.1		NP_055082.1
GeneID:93650	ACPT	19	50790415	50795224	4809	+	8	NDMM_1::8052, NDMM_2::7425, NDMM_3::5804, LRMM_1::9381, LRMM_2::8946, LRMM_3::6057, NDMM_4::9562, LRMM_4::9430	14385, 14385, 14385, 14385, 14369, 14385, 14385, 14353	downstream, downstream, downstream, downstream, downstream, downstream, downstream, downstream	1	1	1	1	1	1	1	1	83	77	57	146	157	52	71	192	1	LRMM_4	192	Gene ACPT	ACPT	acid phosphatase, testicular	NM_033068.2		NP_149059.1
GeneID:84798	C19orf48	19	50797693	50804853	7160	-	8	NDMM_1::8052, NDMM_2::7425, NDMM_3::5804, LRMM_1::9381, LRMM_2::8946, LRMM_3::6057, NDMM_4::9562, LRMM_4::9430	53, 53, 53, 53, 69, 53, 53, 85	in gene, in gene, in gene, in gene, in gene, in gene, in gene, in gene	1	1	1	1	1	1	1	1	83	77	57	146	157	52	71	192	1	LRMM_4	192	Gene C19orf48	MGC13170, C19orf48	chromosome 19 open reading frame 48	NM_001290154.1, NM_199250.2, NM_001290151.1, NM_001290155.1, NM_001290152.1, NM_032712.2, NM_001290150.1, NM_001290149.1, NM_001290153.1, NM_199249.2		NP_001277083.1, NP_954858.1, NP_001277080.1, NP_001277084.1, NP_001277081.1, NP_954857.1, NP_116101.1, NP_001277079.1, NP_001277078.1, NP_001277082.1
GeneID:692203	SNORD88B	19	50799029	50799125	96	-	8	NDMM_1::8052, NDMM_2::7425, NDMM_3::5804, LRMM_1::9381, LRMM_2::8946, LRMM_3::6057, NDMM_4::9562, LRMM_4::9430	-5675, -5675, -5675, -5675, -5659, -5675, -5675, -5643	upstream, upstream, upstream, upstream, upstream, upstream, upstream, upstream	1	1	1	1	1	1	1	1	83	77	57	146	157	52	71	192	1	LRMM_4	192	Gene SNORD88B	HBII-180B, SNORD88B	small nucleolar RNA, C/D box 88B	NR_003068.1
GeneID:692202	SNORD88A	19	50799439	50799535	96	-	8	NDMM_1::8052, NDMM_2::7425, NDMM_3::5804, LRMM_1::9381, LRMM_2::8946, LRMM_3::6057, NDMM_4::9562, LRMM_4::9430	-5265, -5265, -5265, -5265, -5249, -5265, -5265, -5233	upstream, upstream, upstream, upstream, upstream, upstream, upstream, upstream	1	1	1	1	1	1	1	1	83	77	57	146	157	52	71	192	1	LRMM_4	192	Gene SNORD88A	HBII-180A, SNORD88A	small nucleolar RNA, C/D box 88A	NR_003067.1
GeneID:692204	SNORD88C	19	50802325	50802421	96	-	8	NDMM_1::8052, NDMM_2::7425, NDMM_3::5804, LRMM_1::9381, LRMM_2::8946, LRMM_3::6057, NDMM_4::9562, LRMM_4::9430	-2379, -2379, -2379, -2379, -2363, -2379, -2379, -2347	upstream, upstream, upstream, upstream, upstream, upstream, upstream, upstream	1	1	1	1	1	1	1	1	83	77	57	146	157	52	71	192	1	LRMM_4	192	Gene SNORD88C	SNORD88C, HBII-180C	small nucleolar RNA, C/D box 88C	NR_003069.1
GeneID:100506365	OTUD6B-AS1	8	91059906	91070189	10283	-	8	NDMM_1::15734, NDMM_2::14662, NDMM_3::11240, LRMM_1::18568, LRMM_2::17913, LRMM_3::11741, NDMM_4::18933, LRMM_4::17532	45, 13, 141, 45, 13, 45, 13, 13	in gene, in gene, in gene, in gene, in gene, in gene, in gene, in gene	1	1	1	1	1	1	1	1	95	58	61	264	339	93	68	192	1	LRMM_1	339	Gene OTUD6B-AS1	OTUD6B-AS1, GS1-251I9.4	OTUD6B antisense RNA 1 (head to head)	NR_110439.1, NR_110438.1
GeneID:60686	C14orf93	14	22986901	23010201	23300	-	8	NDMM_1::4399, NDMM_2::4326, NDMM_3::3376, LRMM_1::5227, LRMM_2::5067, LRMM_3::3457, NDMM_4::5204, LRMM_4::5193	3193, 3225, 3257, 3225, 3257, 3225, 3097, 3097	in gene, in gene, in gene, in gene, in gene, in gene, in gene, in gene	1	1	1	1	1	1	1	1	70	29	42	184	179	81	57	192	1	LRMM_4	192	Gene C14orf93	C14orf93, FLJ12154	chromosome 14 open reading frame 93	XM_005267971.1, XM_005267972.1, NM_001130706.2, NM_001130708.2, NM_001282968.1, NM_021944.3, NM_001282969.1, NM_001282970.1, XM_006720230.1, XM_006720231.1, XM_011537059.1, XM_011537060.1, XM_005267973.2, XM_011537061.1, XM_011537062.1, XM_006720232.2		XP_005268028.1, XP_005268029.1, NP_001124178.1, NP_001124180.1, NP_001269897.1, NP_068763.2, NP_001269898.1, NP_001269899.1, XP_006720293.1, XP_006720294.1
GeneID:5718	PSMD12	17	67340486	67366605	26119	-	8	NDMM_1::6890, NDMM_2::6352, NDMM_3::5112, LRMM_1::7942, LRMM_2::7733, LRMM_3::5225, NDMM_4::8050, LRMM_4::7966	109, 77, 109, 93, 77, 109, 77, 77	in gene, in gene, in gene, in gene, in gene, in gene, in gene, in gene	1	1	1	1	1	1	1	1	53	77	45	70	147	62	56	192	1	LRMM_4	192	Gene PSMD12	MGC75406, p55, Rpn5, PSMD12	proteasome 26S subunit, non-ATPase 12	NM_002816.3, NM_174871.2, XM_011525048.1, XM_011525049.1, XM_011525050.1		NP_002807.1, NP_777360.1
GeneID:51633	OTUD6B	8	91070196	91087095	16899	+	9	NDMM_1::15734, NDMM_2::14662, NDMM_3::11240, LRMM_1::18568, LRMM_1::18569, LRMM_2::17913, LRMM_3::11741, NDMM_4::18933, LRMM_4::17532	-52, -20, -148, -52, 23020, -20, -52, -20, -20	upstream, upstream, upstream, upstream, downstream, upstream, upstream, upstream, upstream	1	1	1	1	1	1	1	1	48.5	31	31.5	135	185.5	48.5	34.5	192	2	LRMM_1	339	Gene OTUD6B	DUBA5, CGI-77, OTUD6B	OTU domain containing 6B	NM_016023.3, NM_001286745.1, XM_011517129.1		NP_057107.3, NP_001273674.1
GeneID:440600	LOC440600	1	110286375	110339171	52796	-	9	NDMM_1::757, NDMM_1::758, NDMM_2::768, NDMM_3::584, LRMM_1::858, LRMM_2::817, LRMM_3::616, NDMM_4::744, LRMM_4::883	1251, 515, 483, -125, 515, 515, 323, 515, 483	in gene, in gene, in gene, upstream, in gene, in gene, in gene, in gene, in gene	1	1	1	1	1	1	1	1	112	68	66	113	294	105	80	191	1	LRMM_1	294	Gene LOC440600	RP5-1074L1.1	uncharacterized LOC440600	NR_036595.1
GeneID:64783	RBM15	1	110338426	110373218	34792	+	9	NDMM_1::757, NDMM_1::758, NDMM_2::768, NDMM_3::584, LRMM_1::858, LRMM_2::817, LRMM_3::616, NDMM_4::744, LRMM_4::883	-506, 230, 262, 870, 230, 230, 422, 230, 262	upstream, in gene, in gene, in gene, in gene, in gene, in gene, in gene, in gene	1	1	1	1	1	1	1	1	112	68	66	113	294	105	80	191	1	LRMM_1	294	Gene RBM15	FLJ21943, OTT1, MGC119584, SPEN, RBM15, OTT, FLJ12479	RNA binding motif protein 15	NM_022768.4, NM_001201545.1, XM_011541964.1, XM_011541965.1, XM_011541966.1, XM_011541967.1, XM_011541968.1, XM_011541969.1		NP_073605.4, NP_001188474.1
GeneID:8575	PRKRA	2	178431414	178451231	19817	-	9	NDMM_1::9099, NDMM_1::9100, NDMM_2::8470, NDMM_3::6593, LRMM_1::10696, LRMM_2::10141, LRMM_3::6883, NDMM_4::10920, LRMM_4::10653	991, 63, 15, -33, 255, -65, 63, 223, 191	in gene, in gene, in gene, upstream, in gene, upstream, in gene, in gene, in gene	1	1	1	1	1	1	1	1	100	102	77	113	231	90	80	191	1	LRMM_1	231	Gene PRKRA	PRKRA, DYT16, PACT, RAX, HSD14	protein activator of interferon induced protein kinase EIF2AK2	NM_003690.4, NM_001139517.1, NM_001139518.1, XM_005246921.3, XM_011512063.1, XM_011512064.1, XM_011512065.1, XM_011512066.1		NP_003681.1, NP_001132989.1, NP_001132990.1
GeneID:494513	DFNB59	2	178450592	178461390	10798	+	9	NDMM_1::9099, NDMM_1::9100, NDMM_2::8470, NDMM_3::6593, LRMM_1::10696, LRMM_2::10141, LRMM_3::6883, NDMM_4::10920, LRMM_4::10653	-352, 576, 624, 672, 384, 704, 576, 416, 448	upstream, in gene, in gene, in gene, in gene, in gene, in gene, in gene, in gene	1	1	1	1	1	1	1	1	100	102	77	113	231	90	80	191	1	LRMM_1	231	Gene DFNB59	DFNB59, PJVK	deafness, autosomal recessive 59	NM_001042702.3, XM_005246627.1, XM_005246628.2, XM_005246629.2, XM_011511247.1, XR_922929.1, XM_011511248.1, XM_011511249.1, XM_011511250.1, XM_011511251.1		NP_001036167.1, XP_005246684.1
GeneID:23401	FRAT2	10	97332497	97334701	2204	-	7	NDMM_1::2050, NDMM_2::2074, LRMM_1::2592, LRMM_2::2574, LRMM_3::1722, NDMM_4::2438, LRMM_4::2532	-179, -243, -179, -99, -163, -179, -195	upstream, upstream, upstream, upstream, upstream, upstream, upstream	1	1	0	1	1	1	1	1	89	91	13	130	86	55	32	191	1	LRMM_4	191	Gene FRAT2	FRAT2, MGC10562	frequently rearranged in advanced T-cell lymphomas 2	NM_012083.2		NP_036215.1
GeneID:105378448	LOC105378448	10	97335446	97343203	7757	+	7	NDMM_1::2050, NDMM_2::2074, LRMM_1::2592, LRMM_2::2574, LRMM_3::1722, NDMM_4::2438, LRMM_4::2532	-566, -502, -566, -646, -582, -566, -550	upstream, upstream, upstream, upstream, upstream, upstream, upstream	1	1	0	1	1	1	1	1	89	91	13	130	86	55	32	191	1	LRMM_4	191	Gene LOC105378448		uncharacterized LOC105378448	XR_959787.1, XR_946228.1
GeneID:101929112	LOC101929112	10	73251622	73254343	2721	+	16	NDMM_1::1902, NDMM_1::1903, NDMM_2::1934, NDMM_2::1935, NDMM_3::1534, NDMM_3::1535, LRMM_1::2444, LRMM_1::2445, LRMM_2::2414, LRMM_2::2415, LRMM_3::1624, LRMM_3::1625, NDMM_4::2254, NDMM_4::2255, LRMM_4::2381, LRMM_4::2382	-4390, 986, -4390, 1050, -4454, 954, -4390, 954, -4390, 986, -4390, 986, -4390, 986, -4390, 986	upstream, in gene, upstream, in gene, upstream, in gene, upstream, in gene, upstream, in gene, upstream, in gene, upstream, in gene, upstream, in gene	1	1	1	1	1	1	1	1	80.5	86	53.5	111.5	161	100.5	65	190.5	2	LRMM_4	248	Gene LOC101929112		uncharacterized LOC101929112	XR_959610.1, XR_252763.3, XR_959611.1, XR_959612.1, XR_946057.1, XR_246129.3, XR_946058.1, XR_946059.1
GeneID:79042	TSEN34	19	54189517	54194536	5019	+	19	NDMM_1::8076, NDMM_1::8077, NDMM_2::7451, NDMM_2::7452, NDMM_3::5816, NDMM_3::5817, NDMM_3::5818, LRMM_1::9406, LRMM_1::9407, LRMM_2::8965, LRMM_2::8966, LRMM_2::8967, LRMM_3::6069, LRMM_3::6070, LRMM_3::6071, NDMM_4::9608, NDMM_4::9609, LRMM_4::9454, LRMM_4::9455	819, 11379, 851, 11443, 499, 1523, 11363, 819, 11379, -9549, 1523, 11379, 851, 1395, 11379, 851, 11347, 819, 11379	in gene, downstream, in gene, downstream, in gene, in gene, downstream, in gene, downstream, upstream, in gene, downstream, in gene, in gene, downstream, in gene, downstream, in gene, downstream	1	1	1	1	1	1	1	1	105.333	66.667	33	113	160.667	52	44	190.333	3	LRMM_4	429	Gene TSEN34	LENG5, TSEN34, SEN34, PCH2C, SEN34L	tRNA splicing endonuclease subunit 34	NM_024075.4, NM_001077446.3, NM_001282332.1, NM_001282333.1, XM_005278290.3, XM_011527294.1, XM_011527295.1, XM_005277087.3, XM_011547122.1, XM_011547123.1, XM_005259241.3, XM_011547532.1, XM_011547533.1, XM_011547792.1, XM_011547793.1, XM_011547794.1, XM		NP_076980.2, NP_001070914.1, NP_001269261.1, NP_001269262.1
GeneID:105377348	LOC105377348	4	102828096	102844099	16003	+	10	NDMM_1::11976, NDMM_2::11356, NDMM_2::11357, NDMM_3::8678, NDMM_3::8679, LRMM_1::14261, LRMM_2::13661, LRMM_3::9141, NDMM_4::14501, LRMM_4::13766	96, -720, 224, -784, 224, -32, 192, 224, 224, 96	in gene, upstream, in gene, upstream, in gene, upstream, in gene, in gene, in gene, in gene	1	1	1	1	1	1	1	1	128	90	63	212	195	196	90	190	1	NDMM_4	212	Gene LOC105377348		uncharacterized LOC105377348	XR_949891.1, XR_939031.1
GeneID:51014	TMED7	5	115613208	115626179	12971	-	9	NDMM_1::12857, NDMM_2::12177, NDMM_3::9242, LRMM_1::15170, LRMM_2::14807, LRMM_3::9714, LRMM_3::9715, NDMM_4::15511, LRMM_4::14647	227, 195, 227, 227, 227, 227, -125, 179, 211	in gene, in gene, in gene, in gene, in gene, in gene, upstream, in gene, in gene	1	1	1	1	1	1	1	1	75	87	56	63	89	101	71	190	1	LRMM_4	190	Gene TMED7	p24g3, FLJ90481, FLJ57776, TMED7, CGI-109, p27	transmembrane p24 trafficking protein 7	NM_181836.5		NP_861974.1
GeneID:4534	MTM1	X	150562658	150673143	110485	+	8	NDMM_1::17070, NDMM_2::16002, LRMM_1::20505, LRMM_2::19453, LRMM_2::19454, LRMM_3::12714, NDMM_4::20786, LRMM_4::19294	6014, 6270, 6078, 6014, 6430, 6110, 6014, 6094	in gene, in gene, in gene, in gene, in gene, in gene, in gene, in gene	1	1	0	1	1	1	1	1	35	21	21	40	84	28	21	189	1	LRMM_4	189	Gene MTM1	CNM, XLMTM, MTMX, MTM1	myotubularin 1	NM_000252.2, XM_011531170.1, XM_011531171.1, XM_011531172.1, XM_005274687.2, XM_011531173.1		NP_000243.1
GeneID:128338	DRAM2	1	111117332	111140216	22884	-	8	NDMM_1::769, NDMM_2::776, NDMM_3::592, LRMM_1::870, LRMM_2::828, LRMM_3::629, NDMM_4::755, LRMM_4::897	-72, -72, -72, -72, -72, -72, -72, -72	upstream, upstream, upstream, upstream, upstream, upstream, upstream, upstream	1	1	1	1	1	1	1	1	101	69	107	115	220	149	121	188	1	LRMM_1	220	Gene DRAM2	RP5-1180E21.1, MGC54289, TMEM77, DRAM2, WWFQ154, PRO180, CORD21	DNA damage regulated autophagy modulator 2	NM_178454.4, XM_005270469.1, XM_005270470.1, XM_006710361.1, XM_006710362.1, XM_011540707.1, XM_011540708.1		NP_848549.3, XP_005270526.1, XP_005270527.1, XP_006710424.1, XP_006710425.1
GeneID:10390	CEPT1	1	111139627	111185102	45475	+	8	NDMM_1::769, NDMM_2::776, NDMM_3::592, LRMM_1::870, LRMM_2::828, LRMM_3::629, NDMM_4::755, LRMM_4::897	661, 661, 661, 661, 661, 661, 661, 661	in gene, in gene, in gene, in gene, in gene, in gene, in gene, in gene	1	1	1	1	1	1	1	1	101	69	107	115	220	149	121	188	1	LRMM_1	220	Gene CEPT1	MGC45223, CEPT1, DKFZp313G0615	choline/ethanolamine phosphotransferase 1	NM_001007794.1, NM_006090.3, XM_006710285.2, XM_011540496.1, XM_005270353.2, XR_946518.1		NP_001007795.1, NP_006081.1
GeneID:23435	TARDBP	1	11012622	11025492	12870	+	8	NDMM_1::98, NDMM_2::88, NDMM_3::63, LRMM_1::104, LRMM_2::102, LRMM_3::70, NDMM_4::93, LRMM_4::100	-142, -142, -142, -142, -126, -142, -142, -142	upstream, upstream, upstream, upstream, upstream, upstream, upstream, upstream	1	1	1	1	1	1	1	1	88	110	64	127	253	96	104	188	1	LRMM_1	253	Gene TARDBP	TARDBP, ALS10, TDP-43	TAR DNA binding protein	NM_007375.3, XR_946596.1, XR_946597.1		NP_031401.1
GeneID:125050	RN7SK	6	52995620	52995951	331	+	8	NDMM_1::13792, NDMM_2::13085, NDMM_3::9872, LRMM_1::16187, LRMM_2::15898, LRMM_3::10425, NDMM_4::16632, LRMM_4::15792	-228, -228, -132, -228, -244, -228, -180, -228	upstream, upstream, upstream, upstream, upstream, upstream, upstream, upstream	1	1	1	1	1	1	1	1	109	86	89	163	150	111	94	188	1	LRMM_4	188	Gene RN7SK	RN7SK, 7SK	RNA, 7SK small nuclear	NR_001445.2
GeneID:29954	POMT2	14	77274956	77320884	45928	-	11	NDMM_1::4777, NDMM_1::4778, NDMM_2::4548, NDMM_3::3664, NDMM_3::3665, LRMM_1::5597, LRMM_2::5474, LRMM_3::3712, NDMM_4::5648, LRMM_4::5561, LRMM_4::5562	404, -236, -236, 404, -364, -236, -364, -364, -236, 404, -236	in gene, upstream, upstream, in gene, upstream, upstream, upstream, upstream, upstream, in gene, upstream	1	1	1	1	1	1	1	1	119	52	57	182	180	114	72	187	1	LRMM_4	187	Gene POMT2	DKFZp686G10254, MDDGC2, FLJ22309, POMT2, MDDGA2, MDDGB2, LGMD2N	protein O-mannosyltransferase 2	NM_013382.5, XM_011536675.1, XM_011536676.1, XR_943416.1, XM_011536677.1, XM_011536678.1, XM_011536679.1, XM_011536680.1		NP_037514.2
GeneID:2954	GSTZ1	14	77320887	77331597	10710	+	11	NDMM_1::4777, NDMM_1::4778, NDMM_2::4548, NDMM_3::3664, NDMM_3::3665, LRMM_1::5597, LRMM_2::5474, LRMM_3::3712, NDMM_4::5648, LRMM_4::5561, LRMM_4::5562	-407, 233, 233, -407, 361, 233, 361, 361, 233, -407, 233	upstream, in gene, in gene, upstream, in gene, in gene, in gene, in gene, in gene, upstream, in gene	1	1	1	1	1	1	1	1	119	52	57	182	180	114	72	187	1	LRMM_4	187	Gene GSTZ1	MAI, GSTZ1-1, GSTZ1, MGC2029, MAAI	glutathione S-transferase zeta 1	NM_001513.3, NM_145870.2, NM_145871.2, XM_011536670.1, XM_011536671.1, XM_005267559.2		NP_001504.2, NP_665877.1, NP_665878.2
GeneID:105376136	LOC105376136	9	89288578	89311105	22527	-	16	NDMM_1::16321, NDMM_1::16322, NDMM_2::15255, NDMM_2::15256, NDMM_3::11688, NDMM_3::11689, LRMM_1::19493, LRMM_1::19494, LRMM_2::18554, LRMM_2::18555, LRMM_3::12186, LRMM_3::12187, NDMM_4::19726, NDMM_4::19727, LRMM_4::18274, LRMM_4::18275	481, -7487, 513, -7615, 513, -7583, 353, -7487, 353, -7487, 385, -7487, 353, -7551, 513, -7487	in gene, upstream, in gene, upstream, in gene, upstream, in gene, upstream, in gene, upstream, in gene, upstream, in gene, upstream, in gene, upstream	1	1	1	1	1	1	1	1	143.5	80.5	47	181	341.5	78	57.5	187	2	LRMM_1	398	Gene LOC105376136		uncharacterized LOC105376136	XR_958577.1, XR_958578.1, XR_930100.1, XR_930101.1
GeneID:1164	CKS2	9	89311195	89316703	5508	+	16	NDMM_1::16321, NDMM_1::16322, NDMM_2::15255, NDMM_2::15256, NDMM_3::11688, NDMM_3::11689, LRMM_1::19493, LRMM_1::19494, LRMM_2::18554, LRMM_2::18555, LRMM_3::12186, LRMM_3::12187, NDMM_4::19726, NDMM_4::19727, LRMM_4::18274, LRMM_4::18275	-571, 7397, -603, 7525, -603, 7493, -443, 7397, -443, 7397, -475, 7397, -443, 7461, -603, 7397	upstream, downstream, upstream, downstream, upstream, downstream, upstream, downstream, upstream, downstream, upstream, downstream, upstream, downstream, upstream, downstream	1	1	1	1	1	1	1	1	143.5	80.5	47	181	341.5	78	57.5	187	2	LRMM_1	398	Gene CKS2	CKSHS2, CKS2	CDC28 protein kinase regulatory subunit 2	NM_001827.2		NP_001818.1
GeneID:100422936	MIR3153	9	89312225	89312306	81	+	16	NDMM_1::16321, NDMM_1::16322, NDMM_2::15255, NDMM_2::15256, NDMM_3::11688, NDMM_3::11689, LRMM_1::19493, LRMM_1::19494, LRMM_2::18554, LRMM_2::18555, LRMM_3::12186, LRMM_3::12187, NDMM_4::19726, NDMM_4::19727, LRMM_4::18274, LRMM_4::18275	-1601, 6367, -1633, 6495, -1633, 6463, -1473, 6367, -1473, 6367, -1505, 6367, -1473, 6431, -1633, 6367	upstream, downstream, upstream, downstream, upstream, downstream, upstream, downstream, upstream, downstream, upstream, downstream, upstream, downstream, upstream, downstream	1	1	1	1	1	1	1	1	143.5	80.5	47	181	341.5	78	57.5	187	2	LRMM_1	398	Gene MIR3153	MIR3153, mir-3153	microRNA 3153
GeneID:2618	GART	21	33503931	33542917	38986	-	13	NDMM_1::9944, NDMM_1::9945, NDMM_2::9343, NDMM_3::7221, LRMM_1::11903, LRMM_2::11175, LRMM_2::11176, LRMM_3::7607, LRMM_3::7608, NDMM_4::12088, NDMM_4::12089, LRMM_4::11629, LRMM_4::11630	709, 69, 69, 165, 133, 709, 37, 549, 133, 709, 37, 709, 37	in gene, in gene, in gene, in gene, in gene, in gene, in gene, in gene, in gene, in gene, in gene, in gene, in gene	1	1	1	1	1	1	1	1	69	65	53	159	281	80	63	186	1	LRMM_1	281	Gene GART	PAIS, MGC47764, PGFT, PRGS, GART, AIRS, GARTF, GARS	phosphoribosylglycinamide formyltransferase, phosphoribosylglycinamide synthetase, phosphoribosylaminoimidazole synthetase	NM_001136005.1, NM_001136006.1, NM_000819.4, NM_175085.2, XM_005260941.1, XM_006723989.1, XM_006723990.1, XM_011529526.1		NP_001129477.1, NP_001129478.1, NP_000810.1, NP_780294.1, XP_005260998.1, XP_006724052.1, XP_006724053.1
GeneID:6651	SON	21	33543038	33577514	34476	+	13	NDMM_1::9944, NDMM_1::9945, NDMM_2::9343, NDMM_3::7221, LRMM_1::11903, LRMM_2::11175, LRMM_2::11176, LRMM_3::7607, LRMM_3::7608, NDMM_4::12088, NDMM_4::12089, LRMM_4::11629, LRMM_4::11630	-830, -190, -190, -286, -254, -830, -158, -670, -254, -830, -158, -830, -158	upstream, upstream, upstream, upstream, upstream, upstream, upstream, upstream, upstream, upstream, upstream, upstream, upstream	1	1	1	1	1	1	1	1	69	65	53	159	281	80	63	186	1	LRMM_1	281	Gene SON	DBP-5, NREBP, SON3, C21orf50, FLJ21099, BASS1, KIAA1019, FLJ33914, SON	SON DNA binding protein	NM_032195.2, NM_138927.2, NR_103797.1, NM_001291412.1, NM_001291411.1		NP_115571.2, NP_620305.2, NP_001278341.1, NP_001278340.1
GeneID:102465248	MIR6501	21	33550662	33550728	66	+	13	NDMM_1::9944, NDMM_1::9945, NDMM_2::9343, NDMM_3::7221, LRMM_1::11903, LRMM_2::11175, LRMM_2::11176, LRMM_3::7607, LRMM_3::7608, NDMM_4::12088, NDMM_4::12089, LRMM_4::11629, LRMM_4::11630	-8454, -7814, -7814, -7910, -7878, -8454, -7782, -8294, -7878, -8454, -7782, -8454, -7782	upstream, upstream, upstream, upstream, upstream, upstream, upstream, upstream, upstream, upstream, upstream, upstream, upstream	1	1	1	1	1	1	1	1	69	65	53	159	281	80	63	186	1	LRMM_1	281	Gene MIR6501	mir-6501, MIR6501, hsa-mir-6501	microRNA 6501
GeneID:7016	TESK1	9	35605284	35610041	4757	+	12	NDMM_1::16189, NDMM_2::15122, NDMM_2::15123, NDMM_3::11596, LRMM_1::19303, LRMM_2::18412, LRMM_2::18413, LRMM_3::12087, LRMM_3::12088, NDMM_4::19564, LRMM_4::18123, LRMM_4::18124	-964, -932, -196, -964, -964, -948, -356, -964, -196, -1060, -1060, -244	upstream, upstream, upstream, upstream, upstream, upstream, upstream, upstream, upstream, upstream, upstream, upstream	1	1	1	1	1	1	1	1	93	70	53	126	209	48	59	186	1	LRMM_1	209	Gene TESK1	TESK1		NM_006285.2, XM_011518011.1		NP_006276.2
GeneID:100616214	MIR4667	9	35608094	35608159	65	+	12	NDMM_1::16189, NDMM_2::15122, NDMM_2::15123, NDMM_3::11596, LRMM_1::19303, LRMM_2::18412, LRMM_2::18413, LRMM_3::12087, LRMM_3::12088, NDMM_4::19564, LRMM_4::18123, LRMM_4::18124	-3774, -3742, -3006, -3774, -3774, -3758, -3166, -3774, -3006, -3870, -3870, -3054	upstream, upstream, upstream, upstream, upstream, upstream, upstream, upstream, upstream, upstream, upstream, upstream	1	1	1	1	1	1	1	1	93	70	53	126	209	48	59	186	1	LRMM_1	209	Gene MIR4667	MIR4667, mir-4667	microRNA 4667
GeneID:64216	TFB2M	1	246540561	246566319	25758	-	8	NDMM_1::1532, NDMM_2::1571, NDMM_3::1208, LRMM_1::2069, LRMM_2::1950, LRMM_3::1392, NDMM_4::1808, LRMM_4::2012	-241, -273, -273, -241, -273, -81, -113, -273	upstream, upstream, upstream, upstream, upstream, upstream, upstream, upstream	1	1	1	1	1	1	1	1	57	71	44	164	212	105	57	186	1	LRMM_1	212	Gene TFB2M	Hkp1, FLJ22661, TFB2M, FLJ23182	transcription factor B2, mitochondrial	NM_022366.2, XM_011544248.1		NP_071761.1
GeneID:5518	PPP2R1A	19	52189802	52226425	36623	+	8	NDMM_1::8059, NDMM_2::7434, NDMM_3::5809, LRMM_1::9391, LRMM_2::8949, LRMM_3::6062, NDMM_4::9580, LRMM_4::9440	406, 406, 406, 310, 406, 230, 406, 310	in gene, in gene, in gene, in gene, in gene, in gene, in gene, in gene	1	1	1	1	1	1	1	1	95	92	40	139	172	53	44	186	1	LRMM_4	186	Gene PPP2R1A	MRD36, PR65A, MGC786, PPP2R1A, PP2AAALPHA, PP2A-Aalpha	protein phosphatase 2 regulatory subunit A, alpha	NM_014225.5, NR_033500.1		NP_055040.2
GeneID:4799	NFX1	9	33290420	33371157	80737	+	17	NDMM_1::16159, NDMM_1::16160, NDMM_2::15096, NDMM_2::15097, NDMM_3::11572, NDMM_3::11573, LRMM_1::19257, LRMM_1::19258, LRMM_1::19259, LRMM_2::18392, LRMM_2::18393, LRMM_3::12062, LRMM_3::12063, NDMM_4::19529, NDMM_4::19530, LRMM_4::18073, LRMM_4::18074	108, 7308, 108, 7233, 268, 7212, 108, 7212, 20172, 492, 7308, 108, 7180, 140, 7276, 108, 7212	in gene, in gene, in gene, in gene, in gene, in gene, in gene, in gene, in gene, in gene, in gene, in gene, in gene, in gene, in gene, in gene, in gene	1	1	1	1	1	1	1	1	69.333	46.667	33.667	85	162.333	27	44	185.667	3	LRMM_1	321	Gene NFX1	DKFZp779G2416, NFX1, MGC20369, NFX2, Tex42, TEG-42	nuclear transcription factor, X-box binding 1	NM_002504.4, NM_147133.2, NM_147134.2, XM_005251473.1, XM_005251474.3, XM_005251475.3		NP_002495.2, NP_667344.1, NP_667345.1, XP_005251530.1
GeneID:116224	FAM122A	9	68780048	68783693	3645	+	8	NDMM_1::16248, NDMM_2::15179, NDMM_3::11641, LRMM_1::19389, LRMM_2::18459, LRMM_3::12138, NDMM_4::19651, LRMM_4::18205	-48, 64, 80, 48, -288, -272, 48, 112	upstream, in gene, in gene, in gene, upstream, upstream, in gene, in gene	1	1	1	1	1	1	1	1	92	87	61	165	187	67	60	185	1	LRMM_1	187	Gene FAM122A	C9orf42, FAM122A, MGC17347	family with sequence similarity 122A	NM_138333.3		NP_612206.3
GeneID:1657	DMXL1	5	119071014	119249129	178115	+	9	NDMM_1::12862, NDMM_2::12188, NDMM_3::9247, LRMM_1::15181, LRMM_1::15182, LRMM_2::14814, LRMM_3::9721, NDMM_4::15515, LRMM_4::14654	-230, 218, 250, 186, 12874, 250, 186, 186, 202	upstream, in gene, in gene, in gene, in gene, in gene, in gene, in gene, in gene	1	1	1	1	1	1	1	1	59	38.5	52	56.5	106	66	38	185	2	LRMM_1	188	Gene DMXL1	FLJ44772, DKFZp779O1239, DMXL1	Dmx like 1	XM_005271912.1, NM_005509.5, NM_001290321.2, NM_001290322.2, XM_011543212.1, XM_005271909.3, XM_011543213.1, XM_005271910.3, XM_011543214.1, XM_011543215.1, XR_948239.1		XP_005271969.1, NP_005500.4, NP_001277250.1, NP_001277251.1
GeneID:105374567	LOC105374567	2	42808519	42971692	163173	+	8	NDMM_1::8376, NDMM_2::7763, NDMM_3::6022, LRMM_1::9769, LRMM_2::9295, LRMM_3::6305, NDMM_4::9972, LRMM_4::9820	1849, 1785, 1849, 1785, 1753, 1657, 1785, 1849	in gene, in gene, in gene, in gene, in gene, in gene, in gene, in gene	1	1	1	1	1	1	1	1	59	60	41	152	198	63	37	185	1	LRMM_1	198	Gene LOC105374567		proline-rich protein 2-like	XM_011513919.1, XR_925556.1, XR_925557.1, XR_925558.1, XM_011533228.1, XR_940010.1, XR_940011.1, XR_940012.1, XR_940013.1
GeneID:100189265	TRI-TAT2-1	2	42810536	42810628	92	+	8	NDMM_1::8376, NDMM_2::7763, NDMM_3::6022, LRMM_1::9769, LRMM_2::9295, LRMM_3::6305, NDMM_4::9972, LRMM_4::9820	-168, -232, -168, -232, -264, -360, -232, -168	upstream, upstream, upstream, upstream, upstream, upstream, upstream, upstream	1	1	1	1	1	1	1	1	59	60	41	152	198	63	37	185	1	LRMM_1	198	Gene TRI-TAT2-1	TRNAI13, TRI-TAT2-1	transfer RNA-Ile (TAT) 2-1
GeneID:55325	UFSP2	4	185399540	185425985	26445	-	19	NDMM_1::12247, NDMM_1::12248, NDMM_1::12249, NDMM_2::11672, NDMM_2::11673, NDMM_3::8906, NDMM_3::8907, LRMM_1::14581, LRMM_1::14582, LRMM_2::14130, LRMM_2::14131, LRMM_3::9362, LRMM_3::9363, NDMM_4::14889, NDMM_4::14890, NDMM_4::14891, LRMM_4::14071, LRMM_4::14072, LRMM_4::14073	29526, 12897, -127, 29889, -31, 29569, -111, 29569, -111, 29569, -127, 29537, -127, 29473, 13217, -127, 29569, 13217, -127	downstream, in gene, upstream, downstream, upstream, downstream, upstream, downstream, upstream, downstream, upstream, downstream, upstream, downstream, in gene, upstream, downstream, in gene, upstream	1	1	1	1	1	1	1	1	91.667	95.667	60.333	155.333	144.667	92.333	79	184.667	3	LRMM_4	400	Gene UFSP2	C4orf20, FLJ11200, UFSP2, BHD	UFM1-specific peptidase 2	NM_018359.3, NR_028085.1, XM_011532090.1		NP_060829.2
GeneID:441054	C4orf47	4	185405235	185449828	44593	+	19	NDMM_1::12247, NDMM_1::12248, NDMM_1::12249, NDMM_2::11672, NDMM_2::11673, NDMM_3::8906, NDMM_3::8907, LRMM_1::14581, LRMM_1::14582, LRMM_2::14130, LRMM_2::14131, LRMM_3::9362, LRMM_3::9363, NDMM_4::14889, NDMM_4::14890, NDMM_4::14891, LRMM_4::14071, LRMM_4::14072, LRMM_4::14073	-8776, 7853, 20877, -9139, 20781, -8819, 20861, -8819, 20861, -8819, 20877, -8787, 20877, -8723, 7533, 20877, -8819, 7533, 20877	upstream, in gene, in gene, upstream, in gene, upstream, in gene, upstream, in gene, upstream, in gene, upstream, in gene, upstream, in gene, in gene, upstream, in gene, in gene	1	1	1	1	1	1	1	1	91.667	95.667	60.333	155.333	144.667	92.333	79	184.667	3	LRMM_4	400	Gene C4orf47	C4orf47	chromosome 4 open reading frame 47	NM_001114357.1, XM_011531985.1, XM_005263019.3, XM_011531986.1, XM_011531987.1, XM_006714224.2, XM_011531988.1, XM_011531989.1, XM_011531990.1, XM_011531991.1, XM_011531992.1		NP_001107829.1
GeneID:25820	ARIH1	15	72474282	72586560	112278	+	12	NDMM_1::5519, NDMM_2::5032, NDMM_2::5033, NDMM_3::4081, LRMM_1::6220, LRMM_2::6110, LRMM_2::6111, LRMM_3::4164, LRMM_3::4165, NDMM_4::6322, NDMM_4::6323, LRMM_4::6242	-458, -298, 790, -458, -106, -458, 886, -458, 790, -106, 822, -458	upstream, upstream, in gene, upstream, upstream, upstream, in gene, upstream, in gene, upstream, in gene, upstream	1	1	1	1	1	1	1	1	248	97	64	163	318	123	71	184	1	LRMM_1	318	Gene ARIH1	HARI, UBCH7BP, FLJ20329, ARI, ARIH1, DKFZp686O13120, FLJ93118, HHARI	ariadne RBR E3 ubiquitin protein ligase 1	NM_005744.3, XM_011521438.1, XM_011521439.1		NP_005735.2
GeneID:55125	CEP192	18	12991321	13125053	133732	+	8	NDMM_1::7114, NDMM_2::6571, NDMM_3::5265, LRMM_1::8278, LRMM_2::7987, LRMM_3::5393, NDMM_4::8331, LRMM_4::8296	39, 39, 135, 39, 39, 167, 39, 39	in gene, in gene, in gene, in gene, in gene, in gene, in gene, in gene	1	1	1	1	1	1	1	1	99	91	48	145	222	108	51	184	1	LRMM_1	222	Gene CEP192	CEP192, PPP1R62	centrosomal protein 192kDa	NM_032142.3, XM_005258108.1, XM_005258110.1, XM_005258107.2, XM_006722326.2, XM_011525672.1, XM_011525673.1, XM_005258109.2, XM_006722327.2, XM_011525674.1, XR_430040.2, XM_011525675.1, XM_006722330.2, XR_935064.1, XM_011525676.1, XR_243809.2		NP_115518.3, XP_005258165.1, XP_005258167.1
GeneID:101929066	LOC101929066	8	18084868	18097651	12783	+	14	NDMM_1::15427, NDMM_1::15428, NDMM_2::14336, NDMM_2::14337, NDMM_3::10970, LRMM_1::18092, LRMM_2::17532, LRMM_2::17533, LRMM_3::11496, LRMM_3::11497, NDMM_4::18438, NDMM_4::18439, LRMM_4::17179, LRMM_4::17180	-1316, -708, -612, -148, -612, -612, -1540, -612, -1348, -676, -1188, -612, -1380, -676	upstream, upstream, upstream, upstream, upstream, upstream, upstream, upstream, upstream, upstream, upstream, upstream, upstream, upstream	1	1	1	1	1	1	1	1	68	94	60	180	90	137	66	183	1	LRMM_4	183	Gene LOC101929066		uncharacterized LOC101929066	NR_125430.1, NR_125429.1
GeneID:105379177	LOC105379177	5	132958513	132962693	4180	-	8	NDMM_1::12944, NDMM_2::12254, NDMM_3::9305, LRMM_1::15272, LRMM_2::14945, LRMM_3::9778, NDMM_4::15599, LRMM_4::14732	-1115, -1115, -1115, -1115, -923, -955, -1115, -1083	upstream, upstream, upstream, upstream, upstream, upstream, upstream, upstream	1	1	1	1	1	1	1	1	116	59	40	101	203	89	42	183	1	LRMM_1	203	Gene LOC105379177		uncharacterized LOC105379177	XM_011549015.1, XM_011543785.1
GeneID:124925	SEZ6	17	28954905	29006440	51535	-	12	NDMM_1::6536, NDMM_2::5968, NDMM_2::5969, NDMM_3::4837, LRMM_1::7413, LRMM_2::7264, LRMM_2::7265, LRMM_3::4928, LRMM_3::4929, NDMM_4::7562, LRMM_4::7416, LRMM_4::7417	54728, 54728, 54024, 54600, 54728, 54600, 54088, 54568, 54088, 54728, 54728, 53992	downstream, downstream, downstream, downstream, downstream, downstream, downstream, downstream, downstream, downstream, downstream, downstream	1	1	1	1	1	1	1	1	98	72	44	170	361	94	55	182	1	LRMM_1	361	Gene SEZ6	SEZ6, BSRPC	seizure related 6 homolog (mouse)	NM_178860.4, NM_001098635.1, NM_001290202.1, XM_011524315.1, XM_011524316.1, XM_011524317.1		NP_849191.3, NP_001092105.1, NP_001277131.1
GeneID:1069	CETN2	X	152827327	152830757	3430	-	8	NDMM_1::17073, NDMM_2::16005, NDMM_3::12205, LRMM_1::20518, LRMM_2::19464, LRMM_3::12718, NDMM_4::20792, LRMM_4::19303	-283, -43, -91, -91, -155, -299, -91, -91	upstream, upstream, upstream, upstream, upstream, upstream, upstream, upstream	1	1	1	1	1	1	1	1	33	27	23	41	81	36	17	181	1	LRMM_4	181	Gene CETN2	CEN2, CETN2, CALT	centrin 2	NM_004344.1		NP_004335.1
GeneID:50814	NSDHL	X	152830967	152869363	38396	+	8	NDMM_1::17073, NDMM_2::16005, NDMM_3::12205, LRMM_1::20518, LRMM_2::19464, LRMM_3::12718, NDMM_4::20792, LRMM_4::19303	73, -167, -119, -119, -55, 89, -119, -119	in gene, upstream, upstream, upstream, upstream, in gene, upstream, upstream	1	1	1	1	1	1	1	1	33	27	23	41	81	36	17	181	1	LRMM_4	181	Gene NSDHL	XAP104, SDR31E1, NSDHL, H105E3	NAD(P) dependent steroid dehydrogenase-like	NM_015922.2, NM_001129765.1, XM_011531178.1		NP_057006.1, NP_001123237.1
GeneID:8493	PPM1D	17	60600183	60666280	66097	+	8	NDMM_1::6836, NDMM_2::6296, NDMM_3::5071, LRMM_1::7876, LRMM_2::7670, LRMM_3::5177, NDMM_4::7974, LRMM_4::7869	73, 41, 57, 57, 73, 105, 73, 73	in gene, in gene, in gene, in gene, in gene, in gene, in gene, in gene	1	1	1	1	1	1	1	1	55	49	41	58	131	59	51	180	1	LRMM_4	180	Gene PPM1D	WIP1, PP2C-DELTA, PPM1D	protein phosphatase, Mg2+/Mn2+ dependent 1D	NM_003620.3, XR_934577.1		NP_003611.1
GeneID:25858	TEX40	11	64300391	64304767	4376	+	11	NDMM_1::2635, NDMM_2::2649, NDMM_2::2650, NDMM_3::2075, NDMM_3::2076, LRMM_1::3308, LRMM_2::3207, LRMM_2::3208, LRMM_3::2158, NDMM_4::3128, LRMM_4::3189	4809, 4185, 4841, 4185, 4857, 4537, 4185, 4857, 4185, 4825, 4825	downstream, in gene, downstream, in gene, downstream, downstream, in gene, downstream, in gene, downstream, downstream	1	1	1	1	1	1	1	1	102	55	30	125	223	64	37	180	1	LRMM_1	223	Gene TEX40	C11orf20, DKFZp566E164, TEX40	testis expressed 40	NM_001039496.1		NP_001034585.1
GeneID:29850	TRPM5	11	2403952	2435017	31065	-	10	NDMM_1::2282, NDMM_2::2324, NDMM_2::2325, NDMM_3::1842, LRMM_1::2883, LRMM_2::2850, LRMM_3::1910, LRMM_3::1911, NDMM_4::2705, LRMM_4::2812	34857, 34793, 34233, 34793, 34793, 34409, 34905, 34409, 34409, 34409	downstream, downstream, downstream, downstream, downstream, downstream, downstream, downstream, downstream, downstream	1	1	1	1	1	1	1	1	75	45	45	86	116	50	32	180	1	LRMM_4	180	Gene TRPM5	TRPM5, LTRPC5, MTR1		NM_014555.3, XM_011520035.1		NP_055370.1
GeneID:54664	TMEM106B	7	12211222	12237264	26042	+	8	NDMM_1::14460, NDMM_2::13532, NDMM_3::10362, LRMM_1::16862, LRMM_2::16618, LRMM_3::10918, NDMM_4::17421, LRMM_4::16324	42, 138, 10, 74, -54, -54, 42, 74	in gene, in gene, in gene, in gene, upstream, upstream, in gene, in gene	1	1	1	1	1	1	1	1	149	96	102	198	413	84	80	179	1	LRMM_1	413	Gene TMEM106B	MGC33727, TMEM106B, FLJ11273	transmembrane protein 106B	NM_018374.3, NM_001134232.1, XM_005249789.1		NP_060844.2, NP_001127704.1, XP_005249846.1
GeneID:105372598	LOC105372598	20	33989480	33992292	2812	-	8	NDMM_1::9600, NDMM_2::8994, NDMM_3::6996, LRMM_1::11371, LRMM_2::10776, LRMM_3::7318, NDMM_4::11597, LRMM_4::11214	-1468, -1468, -1436, -1468, -1436, -1404, -1436, -1468	upstream, upstream, upstream, upstream, upstream, upstream, upstream, upstream	1	1	1	1	1	1	1	1	72	100	51	174	266	115	75	179	1	LRMM_1	266	Gene LOC105372598		uncharacterized LOC105372598	XR_920044.1, XR_936689.1
GeneID:101926888	RALY-AS1	20	33992488	33994367	1879	-	8	NDMM_1::9600, NDMM_2::8994, NDMM_3::6996, LRMM_1::11371, LRMM_2::10776, LRMM_3::7318, NDMM_4::11597, LRMM_4::11214	607, 607, 639, 607, 639, 671, 639, 607	in gene, in gene, in gene, in gene, in gene, in gene, in gene, in gene	1	1	1	1	1	1	1	1	72	100	51	174	266	115	75	179	1	LRMM_1	266	Gene RALY-AS1	RALY-AS1, RP5-1125A11.1	RALY antisense RNA 1	NR_109885.1, NR_109886.1
GeneID:105372597	LOC105372597	20	34002857	34003619	762	-	8	NDMM_1::9600, NDMM_2::8994, NDMM_3::6996, LRMM_1::11371, LRMM_2::10776, LRMM_3::7318, NDMM_4::11597, LRMM_4::11214	9859, 9859, 9891, 9859, 9891, 9923, 9891, 9859	downstream, downstream, downstream, downstream, downstream, downstream, downstream, downstream	1	1	1	1	1	1	1	1	72	100	51	174	266	115	75	179	1	LRMM_1	266	Gene LOC105372597		uncharacterized LOC105372597	XR_920043.1, XR_936688.1
GeneID:81033	KCNH6	17	63523334	63548977	25643	+	8	NDMM_1::6844, NDMM_2::6311, NDMM_3::5080, LRMM_1::7892, LRMM_2::7686, LRMM_3::5190, NDMM_4::7991, LRMM_4::7888	26714, 26714, 26842, 26746, 26682, 26842, 26714, 26714	downstream, downstream, downstream, downstream, downstream, downstream, downstream, downstream	1	1	1	1	1	1	1	1	53	48	50	79	108	55	34	179	1	LRMM_4	179	Gene KCNH6	KCNH6, ERG2, HERG2, Kv11.2		NM_001278919.1, NM_001278920.1, NM_030779.3, NM_173092.2, XM_011525302.1, XM_011525303.1, XM_011525304.1, XM_011525305.1, XM_011525306.1, XM_011525307.1, XM_011525308.1, XM_011525309.1, XM_011525310.1, XM_011525311.1, XR_934568.1, XM_011525312.1, XM_01152		NP_001265848.1, NP_001265849.1, NP_110406.1, NP_775115.1
GeneID:143879	KBTBD3	11	106046806	106077765	30959	-	8	NDMM_1::2982, NDMM_2::2937, NDMM_3::2290, LRMM_1::3708, LRMM_2::3567, LRMM_3::2400, NDMM_4::3504, LRMM_4::3578	517, 549, 453, 453, 613, 565, 485, 325	in gene, in gene, in gene, in gene, in gene, in gene, in gene, in gene	1	1	1	1	1	1	1	1	115	92	75	133	205	129	80	178	1	LRMM_1	205	Gene KBTBD3	FLJ30685, BKLHD3, KBTBD3	kelch repeat and BTB domain containing 3	NM_198439.2, NM_152433.3, XM_006718767.2, XM_011542618.1, XM_011542619.1		NP_940841.1, NP_689646.2
GeneID:441951	ZFAS1	20	49278178	49289260	11082	+	8	NDMM_1::9745, NDMM_2::9138, NDMM_3::7086, LRMM_1::11605, LRMM_2::10955, LRMM_3::7439, NDMM_4::11798, LRMM_4::11404	158, 158, 110, 158, 142, 158, 158, 158	in gene, in gene, in gene, in gene, in gene, in gene, in gene, in gene	1	1	1	1	1	1	1	1	69	67	34	106	244	53	67	178	1	LRMM_1	244	Gene ZFAS1	C20orf199, HSUP1, NCRNA00275, ZNFX1-AS1, HSUP2, ZFAS1	ZNFX1 antisense RNA 1	NR_003605.1, NR_003604.2, NR_003606.2, NR_036658.1, NR_036659.1
GeneID:26765	SNORD12C	20	49278945	49279023	78	+	8	NDMM_1::9745, NDMM_2::9138, NDMM_3::7086, LRMM_1::11605, LRMM_2::10955, LRMM_3::7439, NDMM_4::11798, LRMM_4::11404	-609, -609, -657, -609, -625, -609, -609, -609	upstream, upstream, upstream, upstream, upstream, upstream, upstream, upstream	1	1	1	1	1	1	1	1	69	67	34	106	244	53	67	178	1	LRMM_1	244	Gene SNORD12C	E3, E2, SNORD106, U106, SNORD12C, RNU106, E2-1	small nucleolar RNA, C/D box 12C	NR_002433.1
GeneID:100113393	SNORD12B	20	49280313	49280415	102	+	8	NDMM_1::9745, NDMM_2::9138, NDMM_3::7086, LRMM_1::11605, LRMM_2::10955, LRMM_3::7439, NDMM_4::11798, LRMM_4::11404	-1977, -1977, -2025, -1977, -1993, -1977, -1977, -1977	upstream, upstream, upstream, upstream, upstream, upstream, upstream, upstream	1	1	1	1	1	1	1	1	69	67	34	106	244	53	67	178	1	LRMM_1	244	Gene SNORD12B	SNORD12B	small nucleolar RNA, C/D box 12B	NR_003695.1
GeneID:692057	SNORD12	20	49280683	49280772	89	+	8	NDMM_1::9745, NDMM_2::9138, NDMM_3::7086, LRMM_1::11605, LRMM_2::10955, LRMM_3::7439, NDMM_4::11798, LRMM_4::11404	-2347, -2347, -2395, -2347, -2363, -2347, -2347, -2347	upstream, upstream, upstream, upstream, upstream, upstream, upstream, upstream	1	1	1	1	1	1	1	1	69	67	34	106	244	53	67	178	1	LRMM_1	244	Gene SNORD12	HBII-99, SNORD12, MIRN1259, MIR1259	small nucleolar RNA, C/D box 12	NR_003030.1
GeneID:54675	CRLS1	20	6006093	6040072	33979	+	10	NDMM_1::9483, NDMM_1::9484, NDMM_2::8876, NDMM_3::6903, LRMM_1::11202, LRMM_1::11203, LRMM_2::10632, LRMM_3::7212, NDMM_4::11457, LRMM_4::11101	3, 16339, -13, -141, -13, 16339, -141, -109, -109, -109	in gene, in gene, upstream, upstream, upstream, in gene, upstream, upstream, upstream, upstream	1	1	1	1	1	1	1	1	64.5	72	46	76.5	228.5	109.5	64.5	178	2	LRMM_1	419	Gene CRLS1	dJ967N21.6, GCD10, CLS1, CRLS1, C20orf155	cardiolipin synthase 1	NM_019095.4, NM_001127458.1, XM_011529262.1, XM_006723579.2, XM_011529263.1, XM_006723580.2, XM_011529264.1, XM_005260737.3, XM_005260738.3, XM_011529265.1		NP_061968.1, NP_001120930.1
GeneID:101927221	LOC101927221	8	102239451	102252174	12723	+	8	NDMM_1::15807, NDMM_2::14733, NDMM_3::11295, LRMM_1::18678, LRMM_2::17999, LRMM_3::11788, NDMM_4::19026, LRMM_4::17615	-91, -91, -187, -187, -59, -187, -187, -187	upstream, upstream, upstream, upstream, upstream, upstream, upstream, upstream	1	1	1	1	1	1	1	1	77	71	78	194	278	101	52	178	1	LRMM_1	278	Gene LOC101927221	UBR5-AS1, KB-431C1.4	UBR5 antisense RNA 1	NR_125415.1
GeneID:101928234	LOC101928234	3	38156046	38165478	9432	-	8	NDMM_1::10606, NDMM_2::10005, NDMM_3::7694, LRMM_1::12715, LRMM_2::11954, LRMM_3::8113, NDMM_4::12959, LRMM_4::12351	230, 134, 550, 358, 550, 486, 134, 166	in gene, in gene, in gene, in gene, in gene, in gene, in gene, in gene	1	1	1	1	1	1	1	1	103	64	60	138	190	74	46	178	1	LRMM_1	190	Gene LOC101928234		uncharacterized LOC101928234	XR_937110.1, XR_251348.3, XR_937115.1, XR_937116.1, XR_937117.1, XR_937118.1, XR_937119.1, XR_940728.1, XR_245208.3, XR_940729.1, XR_940730.1, XR_940731.1, XR_940732.1, XR_940733.1
GeneID:9943	OXSR1	3	38165260	38255488	90228	+	8	NDMM_1::10606, NDMM_2::10005, NDMM_3::7694, LRMM_1::12715, LRMM_2::11954, LRMM_3::8113, NDMM_4::12959, LRMM_4::12351	-12, 84, -332, -140, -332, -268, 84, 52	upstream, in gene, upstream, upstream, upstream, upstream, in gene, in gene	1	1	1	1	1	1	1	1	103	64	60	138	190	74	46	178	1	LRMM_1	190	Gene OXSR1	KIAA1101, OSR1, OXSR1	oxidative stress responsive 1	NM_005109.2, XM_005265638.1, XM_011534331.1, XR_940531.1, XM_011534332.1		NP_005100.1, XP_005265695.1
GeneID:23410	SIRT3	11	215030	236362	21332	-	24	NDMM_1::2248, NDMM_1::2249, NDMM_1::2250, NDMM_2::2304, NDMM_2::2305, NDMM_3::1820, NDMM_3::1821, LRMM_1::2838, LRMM_1::2839, LRMM_1::2840, LRMM_1::2841, LRMM_2::2822, LRMM_2::2823, LRMM_2::2824, LRMM_3::1894, LRMM_3::1895, LRMM_3::1896, NDMM_4::2667, NDMM_4::2668, NDMM_4::2669, LRMM_4::2775, LRMM_4::2776, LRMM_4::2777, LRMM_4::2778	28842, 266, -342, 28842, -358, 28842, 10367, 28842, 10282, 202, -342, 28842, 202, -374, 28778, -342, -694, 28842, 10474, -342, 28842, 10474, 106, -342	downstream, in gene, upstream, downstream, upstream, downstream, in gene, downstream, in gene, in gene, upstream, downstream, in gene, upstream, downstream, upstream, upstream, downstream, in gene, upstream, downstream, in gene, in gene, upstream	1	1	1	1	1	1	1	1	68.75	50	40	91.75	199.5	66	39.25	178	4	LRMM_4	505	Gene SIRT3	SIRT3, SIR2L3		NM_012239.5, NM_001017524.2, XM_005252835.1, XM_011519956.1, XM_011519957.1		NP_036371.1, NP_001017524.1, XP_005252892.1
GeneID:57727	NCOA5	20	46060985	46089952	28967	-	9	NDMM_1::9704, NDMM_2::9097, NDMM_3::7070, LRMM_1::11550, LRMM_2::10925, LRMM_3::7409, NDMM_4::11762, LRMM_4::11357, LRMM_4::11358	192, 128, 128, 128, 128, 192, 128, 128, -9712	in gene, in gene, in gene, in gene, in gene, in gene, in gene, in gene, upstream	1	1	1	1	1	1	1	1	76.5	72	44	128.5	230.5	177	54.5	176.5	2	LRMM_1	459	Gene NCOA5	bA465L10.6, CIA, NCOA5	nuclear receptor coactivator 5	NM_020967.2, XM_005260474.2, XM_011528951.1		NP_066018.1
GeneID:284403	WDR62	19	36054881	36105111	50230	+	16	NDMM_1::7784, NDMM_1::7785, NDMM_2::7185, NDMM_2::7186, NDMM_3::5652, NDMM_3::5653, LRMM_1::9086, LRMM_1::9087, LRMM_2::8686, LRMM_2::8687, LRMM_3::5856, LRMM_3::5857, NDMM_4::9237, NDMM_4::9238, LRMM_4::9086, LRMM_4::9087	-625, 60159, -609, 60191, -321, 60399, -641, 60447, -609, 60175, -193, 60319, -321, 60447, -641, 60175	upstream, downstream, upstream, downstream, upstream, downstream, upstream, downstream, upstream, downstream, upstream, downstream, upstream, downstream, upstream, downstream	1	1	1	1	1	1	1	1	91.5	59.5	33	107.5	121	61	41.5	176.5	2	LRMM_4	233	Gene WDR62	C19orf14, DKFZp434J046, MGC166976, DKFZp686G1024, FLJ33298, WDR62, MCPH2	WD repeat domain 62	NM_001083961.1, NM_173636.4, XM_011526837.1, XM_005258809.2, XM_011526838.1, XM_011526839.1, XM_011526840.1, XM_011526841.1, XM_011526842.1, XM_011526843.1, XM_011526844.1		NP_001077430.1, NP_775907.4
GeneID:4826	NNAT	20	37521205	37523690	2485	+	8	NDMM_1::9653, NDMM_2::9050, NDMM_3::7030, LRMM_1::11452, LRMM_2::10845, LRMM_3::7367, NDMM_4::11680, LRMM_4::11289	6763, 6827, 6827, 6763, 6795, 6763, 6827, 6763	downstream, downstream, downstream, downstream, downstream, downstream, downstream, downstream	1	1	1	1	1	1	1	1	72	106	62	111	198	117	67	176	1	LRMM_1	198	Gene NNAT	Peg5, MGC1439, NNAT	neuronatin	NM_005386.2, NM_181689.1		NP_005377.1, NP_859017.1
GeneID:7157	TP53	17	7668402	7687550	19148	-	8	NDMM_1::6403, NDMM_2::5863, NDMM_3::4720, LRMM_1::7287, LRMM_2::7114, LRMM_3::4828, NDMM_4::7396, LRMM_4::7269	1118, 1278, 1182, 1278, 1246, 1278, 1278, 1278	in gene, in gene, in gene, in gene, in gene, in gene, in gene, in gene	1	1	1	1	1	1	1	1	100	101	79	138	122	115	53	176	1	LRMM_4	176	Gene TP53	FLJ92943, LFS1, TP53, BCC7, TRP53, p53, P53	tumor protein p53	NM_001126115.1, NM_001126116.1, NM_001126117.1, NM_001126112.2, NM_001126113.2, NM_001126114.2, NM_001126118.1, NM_000546.5, NM_001276761.1, NM_001276695.1, NM_001276699.1, NM_001276760.1, NM_001276698.1, NM_001276696.1, NM_001276697.1		NP_001119587.1, NP_001119588.1, NP_001119589.1, NP_001119584.1, NP_001119585.1, NP_000537.3, NP_001119586.1, NP_001119590.1, NP_001263626.1, NP_001263625.1, NP_001263689.1, NP_001263627.1, NP_001263690.1, NP_001263624.1, NP_001263628.1
GeneID:55135	WRAP53	17	7686071	7703502	17431	+	8	NDMM_1::6403, NDMM_2::5863, NDMM_3::4720, LRMM_1::7287, LRMM_2::7114, LRMM_3::4828, NDMM_4::7396, LRMM_4::7269	361, 201, 297, 201, 233, 201, 201, 201	in gene, in gene, in gene, in gene, in gene, in gene, in gene, in gene	1	1	1	1	1	1	1	1	100	101	79	138	122	115	53	176	1	LRMM_4	176	Gene WRAP53	TCAB1, WRAP53, WDR79, FLJ10385, DKCB3	WD repeat containing, antisense to TP53	NM_018081.2, NM_001143990.1, NM_001143991.1, NM_001143992.1, XM_011523952.1		NP_060551.2, NP_001137462.1, NP_001137463.1, NP_001137464.1
GeneID:105372430	LOC105372430	19	48465471	48469261	3790	-	8	NDMM_1::8001, NDMM_2::7382, NDMM_3::5778, LRMM_1::9323, LRMM_2::8891, LRMM_3::6017, NDMM_4::9495, LRMM_4::9371	77, 77, 29, 141, -83, 77, 109, 205	in gene, in gene, in gene, in gene, upstream, in gene, in gene, in gene	1	1	1	1	1	1	1	1	68	38	32	133	71	30	32	176	1	LRMM_4	176	Gene LOC105372430		uncharacterized LOC105372430	XR_919686.1, XR_919687.1, XR_919688.1, XR_919689.1, XR_936010.1, XR_936011.1, XR_936012.1
GeneID:9266	CYTH2	19	48469208	48482314	13106	+	8	NDMM_1::8001, NDMM_2::7382, NDMM_3::5778, LRMM_1::9323, LRMM_2::8891, LRMM_3::6017, NDMM_4::9495, LRMM_4::9371	-24, -24, 24, -88, 136, -24, -56, -152	upstream, upstream, in gene, upstream, in gene, upstream, upstream, upstream	1	1	1	1	1	1	1	1	68	38	32	133	71	30	32	176	1	LRMM_4	176	Gene CYTH2	ARNO, CTS18.1, CTS18, CYTH2, PSCD2, Sec7p-like, Sec7p-L, SEC7L, PSCD2L	cytohesin 2	NM_017457.5, NM_004228.6, XM_006723472.2, XM_006723473.2		NP_059431.1, NP_004219.3
GeneID:995	CDC25C	5	138285265	138338355	53090	-	16	NDMM_1::12981, NDMM_1::12982, NDMM_2::12295, NDMM_2::12296, NDMM_3::9336, NDMM_3::9337, LRMM_1::15323, LRMM_1::15324, LRMM_2::14989, LRMM_2::14990, LRMM_3::9817, LRMM_3::9818, NDMM_4::15643, NDMM_4::15644, LRMM_4::14780, LRMM_4::14781	6355, 179, 6387, 211, 6387, 179, 6451, 243, 6387, 179, 6387, 179, 6387, 179, 6387, 195	in gene, in gene, in gene, in gene, in gene, in gene, in gene, in gene, in gene, in gene, in gene, in gene, in gene, in gene, in gene, in gene	1	1	1	1	1	1	1	1	82	58	38	115.5	167.5	101	46.5	175.5	2	LRMM_1	242	Gene CDC25C	CDC25C, CDC25, PPP1R60		NM_001790.4, NM_001287582.1, NM_022809.3, NM_001287583.1, XM_005272145.2, XM_011543759.1, XM_011543760.1, XM_005272146.3, XM_011543761.1, XM_006714739.2, XM_011543762.1, XM_011543763.1, XM_011543764.1		NP_001781.2, NP_001274511.1, NP_073720.1, NP_001274512.1
GeneID:100128966	LOC100128966	5	138332055	138336085	4030	+	16	NDMM_1::12981, NDMM_1::12982, NDMM_2::12295, NDMM_2::12296, NDMM_3::9336, NDMM_3::9337, LRMM_1::15323, LRMM_1::15324, LRMM_2::14989, LRMM_2::14990, LRMM_3::9817, LRMM_3::9818, NDMM_4::15643, NDMM_4::15644, LRMM_4::14780, LRMM_4::14781	-55, 6121, -87, 6089, -87, 6121, -151, 6057, -87, 6121, -87, 6121, -87, 6121, -87, 6105	upstream, downstream, upstream, downstream, upstream, downstream, upstream, downstream, upstream, downstream, upstream, downstream, upstream, downstream, upstream, downstream	1	1	1	1	1	1	1	1	82	58	38	115.5	167.5	101	46.5	175.5	2	LRMM_1	242	Gene LOC100128966		uncharacterized LOC100128966	XR_953820.1, XR_948817.1
GeneID:123016	TTC8	14	88824153	88877996	53843	+	8	NDMM_1::4819, NDMM_2::4566, NDMM_3::3691, LRMM_1::5626, LRMM_2::5519, LRMM_3::3734, NDMM_4::5690, LRMM_4::5598	327, 343, 327, 327, 327, 327, 359, 327	in gene, in gene, in gene, in gene, in gene, in gene, in gene, in gene	1	1	1	1	1	1	1	1	113	44	78	151	136	95	62	175	1	LRMM_4	175	Gene TTC8	RP51, TTC8, BBS8	tetratricopeptide repeat domain 8	NM_144596.3, NM_198309.3, NM_198310.3, NM_001288781.1, NM_001288782.1, NM_001288783.1, XM_006720035.1, XM_011536432.1, XM_011536433.1, XM_011536434.1, XM_006720037.2, XM_011536435.1		NP_653197.2, NP_938051.1, NP_938052.1, NP_001275710.1, NP_001275711.1, NP_001275712.1, XP_006720098.1
GeneID:23594	ORC6	16	46689646	46698394	8748	+	8	NDMM_1::6116, NDMM_2::5523, NDMM_3::4418, LRMM_1::6855, LRMM_2::6659, LRMM_3::4541, NDMM_4::6975, LRMM_4::6891	-238, -270, -238, -270, -238, -238, -270, -238	upstream, upstream, upstream, upstream, upstream, upstream, upstream, upstream	1	1	1	1	1	1	1	1	83	93	103	145	163	139	83	174	1	LRMM_4	174	Gene ORC6	ORC6, ORC6L		NM_014321.3, NR_037620.1, XM_011522978.1		NP_055136.1
GeneID:729595	HMGB3P22	5	179694178	179694786	608	+	10	NDMM_1::13289, NDMM_2::12569, NDMM_3::9522, NDMM_3::9523, LRMM_1::15670, LRMM_2::15361, LRMM_3::10016, LRMM_3::10017, NDMM_4::15984, LRMM_4::15146	4318, 4334, 4350, 5166, 4318, 4318, 4318, 4862, 4350, 4318	downstream, downstream, downstream, downstream, downstream, downstream, downstream, downstream, downstream, downstream	1	1	1	1	1	1	1	1	96	91	50	158	210	123	59	174	1	LRMM_1	210	Gene HMGB3P22	HMGB3P22	high mobility group box 3 pseudogene 22
GeneID:131118	DNAJC19	3	180983709	180989774	6065	-	8	NDMM_1::11441, NDMM_2::10796, NDMM_3::8267, LRMM_1::13678, LRMM_2::12824, LRMM_3::8706, NDMM_4::13843, LRMM_4::13164	142, 110, 78, 142, 142, 142, 78, 110	in gene, in gene, in gene, in gene, in gene, in gene, in gene, in gene	1	1	1	1	1	1	1	1	114	103	54	103	201	100	48	174	1	LRMM_1	201	Gene DNAJC19	TIM14, Pam18, TIMM14, PAM18, FLJ99060, DNAJC19	DnaJ heat shock protein family (Hsp40) member C19	NM_001190233.1, NM_145261.3, NR_033721.1, NR_033722.1, NR_033723.1, NR_046073.1		NP_001177162.1, NP_660304.1
GeneID:105378830	LOC105378830	1	86571249	86698263	127014	-	8	NDMM_1::629, NDMM_2::645, NDMM_3::472, LRMM_1::743, LRMM_2::681, LRMM_3::503, NDMM_4::624, LRMM_4::741	-6377, -6377, -6345, -6377, -6377, -6345, -6398, -6409	upstream, upstream, upstream, upstream, upstream, upstream, upstream, upstream	1	1	1	1	1	1	1	1	110	87	74	64	184	88	75	173	1	LRMM_1	184	Gene LOC105378830		uncharacterized LOC105378830	XR_958263.1, XR_947559.1
GeneID:105378828	LOC105378828	1	86703498	86704754	1256	-	8	NDMM_1::629, NDMM_2::645, NDMM_3::472, LRMM_1::743, LRMM_2::681, LRMM_3::503, NDMM_4::624, LRMM_4::741	114, 114, 146, 114, 114, 146, 93, 82	in gene, in gene, in gene, in gene, in gene, in gene, in gene, in gene	1	1	1	1	1	1	1	1	110	87	74	64	184	88	75	173	1	LRMM_1	184	Gene LOC105378828		uncharacterized LOC105378828	XM_011549269.1, XM_011542524.1
GeneID:51100	SH3GLB1	1	86704570	86748184	43614	+	8	NDMM_1::629, NDMM_2::645, NDMM_3::472, LRMM_1::743, LRMM_2::681, LRMM_3::503, NDMM_4::624, LRMM_4::741	70, 70, 38, 70, 70, 38, 91, 102	in gene, in gene, in gene, in gene, in gene, in gene, in gene, in gene	1	1	1	1	1	1	1	1	110	87	74	64	184	88	75	173	1	LRMM_1	184	Gene SH3GLB1	dJ612B15.2, KIAA0491, SH3GLB1, Bif-1, CGI-61, PPP1R70	SH3-domain GRB2 like endophilin B1	NM_016009.4, NM_001206651.1, NM_001206652.1, NM_001206653.1, XM_006710672.2, XM_011541538.1, XM_006710673.2		NP_057093.1, NP_001193580.1, NP_001193581.1, NP_001193582.1
GeneID:27290	SPINK4	9	33240198	33248567	8369	+	7	NDMM_1::16156, NDMM_2::15094, NDMM_3::11569, LRMM_1::19253, LRMM_2::18391, NDMM_4::19527, LRMM_4::18071	9210, 9082, 9274, 9338, 9242, 9338, 9338	downstream, downstream, downstream, downstream, downstream, downstream, downstream	1	1	1	1	1	1	0	1	69	31	21	47	92	28	16	173	1	LRMM_4	173	Gene SPINK4	PEC60, PEC-60, MGC133107, HEL136, SPINK4	serine peptidase inhibitor, Kazal type 4	NM_014471.1		NP_055286.1
GeneID:8659	ALDH4A1	1	18871430	18902799	31369	-	8	NDMM_1::148, NDMM_2::140, NDMM_3::95, LRMM_1::169, LRMM_2::168, LRMM_3::111, NDMM_4::141, LRMM_4::159	79, 47, 47, 47, 63, 47, 63, 79	in gene, in gene, in gene, in gene, in gene, in gene, in gene, in gene	1	1	1	1	1	1	1	1	78	89	46	101	137	88	93	172	1	LRMM_4	172	Gene ALDH4A1	DKFZp779M035, ALDH4, P5CDh, ALDH4A1, P5CD	aldehyde dehydrogenase 4 family member A1	NM_003748.3, NM_170726.2, NM_001161504.1, XM_011542352.1, XR_946786.1, XM_011542353.1		NP_003739.2, NP_733844.1, NP_001154976.1
GeneID:100302276	MIR1290	1	18897071	18897148	77	-	8	NDMM_1::148, NDMM_2::140, NDMM_3::95, LRMM_1::169, LRMM_2::168, LRMM_3::111, NDMM_4::141, LRMM_4::159	-5572, -5604, -5604, -5604, -5588, -5604, -5588, -5572	upstream, upstream, upstream, upstream, upstream, upstream, upstream, upstream	1	1	1	1	1	1	1	1	78	89	46	101	137	88	93	172	1	LRMM_4	172	Gene MIR1290	MIRN1290, hsa-mir-1290, MIR1290	microRNA 1290
GeneID:105373560	LOC105373560	2	112061080	112064122	3042	-	14	NDMM_1::8829, NDMM_1::8830, NDMM_2::8201, NDMM_2::8202, NDMM_3::6360, NDMM_3::6361, LRMM_1::10312, LRMM_2::9806, LRMM_2::9807, LRMM_3::6663, LRMM_3::6664, NDMM_4::10531, LRMM_4::10335, LRMM_4::10336	9690, 8794, 9642, 8794, 9626, 8794, 8794, 9690, 8762, 9690, 8794, 8794, 9701, 8794	downstream, downstream, downstream, downstream, downstream, downstream, downstream, downstream, downstream, downstream, downstream, downstream, downstream, downstream	1	1	1	1	1	1	1	1	64	55	49	131	216	88	55	172	1	LRMM_1	216	Gene LOC105373560		uncharacterized LOC105373560	XR_928774.1, XR_923200.1
GeneID:5819	PVRL2	19	44846136	44889228	43092	+	8	NDMM_1::7921, NDMM_2::7317, NDMM_3::5733, LRMM_1::9241, LRMM_2::8823, LRMM_3::5958, NDMM_4::9408, LRMM_4::9263	44520, 44552, 44520, 44712, 44520, 44520, 44520, 44520	downstream, downstream, downstream, downstream, downstream, downstream, downstream, downstream	1	1	1	1	1	1	1	1	86	69	48	130	142	70	50	172	1	LRMM_4	172	Gene PVRL2	PVRL2, PRR2, HVEB, PVRR2, CD112, NECTIN2	nectin cell adhesion molecule 2	NM_001042724.1, NM_002856.2, XM_011527192.1		NP_001036189.1, NP_002847.1
GeneID:10452	TOMM40	19	44891220	44903689	12469	+	8	NDMM_1::7921, NDMM_2::7317, NDMM_3::5733, LRMM_1::9241, LRMM_2::8823, LRMM_3::5958, NDMM_4::9408, LRMM_4::9263	-564, -532, -564, -372, -564, -564, -564, -564	upstream, upstream, upstream, upstream, upstream, upstream, upstream, upstream	1	1	1	1	1	1	1	1	86	69	48	130	142	70	50	172	1	LRMM_4	172	Gene TOMM40	C19orf1, PEREC1, PER-EC1, TOMM40, TOM40, D19S1177E		NM_006114.2, NM_001128916.1, NM_001128917.1, XM_005258411.2		NP_006105.1, NP_001122388.1, NP_001122389.1
GeneID:10128	LRPPRC	2	43886224	43996005	109781	-	8	NDMM_1::8388, NDMM_2::7776, NDMM_3::6035, LRMM_1::9779, LRMM_2::9310, LRMM_3::6312, NDMM_4::9988, LRMM_4::9834	-123, -123, -123, -102, -123, -91, -123, -107	upstream, upstream, upstream, upstream, upstream, upstream, upstream, upstream	1	1	1	1	1	1	1	1	109	93	40	145	159	120	100	171	1	LRMM_4	171	Gene LRPPRC	LRPPRC, GP130, LSFC, CLONE-23970, LRP130	leucine rich pentatricopeptide repeat containing	NM_133259.3, XM_011532473.1, XM_006711915.2, XM_011532474.1, XM_006711916.2		NP_573566.2
GeneID:101928933	LOC101928933	1	179926390	179954671	28281	-	8	NDMM_1::1180, NDMM_2::1194, NDMM_3::919, LRMM_1::1502, LRMM_2::1448, LRMM_3::1050, NDMM_4::1279, LRMM_4::1510	-49, -177, -177, -113, -177, -177, -49, -49	upstream, upstream, upstream, upstream, upstream, upstream, upstream, upstream	1	1	1	1	1	1	1	1	59	91	47	132	250	116	98	171	1	LRMM_1	250	Gene LOC101928933		uncharacterized LOC101928933	XR_918124.1, XR_250911.2, XR_918125.1, XR_922330.1, XR_241158.2, XR_922331.1
GeneID:54916	TMEM260	14	56579791	56651884	72093	+	8	NDMM_1::4593, NDMM_2::4451, NDMM_3::3538, LRMM_1::5413, LRMM_2::5296, LRMM_3::3584, NDMM_4::5418, LRMM_4::5381	-143, -207, -143, -143, -207, -143, -143, -207	upstream, upstream, upstream, upstream, upstream, upstream, upstream, upstream	1	1	1	1	1	1	1	1	148	73	71	157	172	107	91	171	1	LRMM_1	172	Gene TMEM260	FLJ20392, C14orf101, TMEM260	transmembrane protein 260	NM_017799.3, XR_245695.1, XM_005267771.1, XM_006720176.1, XM_006720178.1, XM_011536850.1, XM_011536851.1, XR_943481.1, XM_011536852.1, XM_011536853.1, XM_011536854.1, XM_006720177.2, XM_011536855.1, XM_011536856.1		NP_060269.3, XP_005267828.1, XP_006720239.1, XP_006720241.1
GeneID:10352	WARS2	1	119031216	119140788	109572	-	8	NDMM_1::832, NDMM_2::832, NDMM_3::648, LRMM_1::942, LRMM_2::900, LRMM_3::685, NDMM_4::818, LRMM_4::971	244, 212, 244, 244, 244, 244, 244, 244	in gene, in gene, in gene, in gene, in gene, in gene, in gene, in gene	1	1	1	1	1	1	1	1	126	78	77	104	277	123	76	171	1	LRMM_1	277	Gene WARS2	WARS2, TrpRS	tryptophanyl tRNA synthetase 2, mitochondrial	NM_201263.2, NM_015836.3, XM_006710283.1, XM_005270350.2, XM_011540493.1, XM_011540494.1, XM_011540495.1		NP_957715.1, NP_056651.1, XP_006710346.1
GeneID:101929147	LOC101929147	1	119140396	119275973	135577	+	8	NDMM_1::832, NDMM_2::832, NDMM_3::648, LRMM_1::942, LRMM_2::900, LRMM_3::685, NDMM_4::818, LRMM_4::971	148, 180, 148, 148, 148, 148, 148, 148	in gene, in gene, in gene, in gene, in gene, in gene, in gene, in gene	1	1	1	1	1	1	1	1	126	78	77	104	277	123	76	171	1	LRMM_1	277	Gene LOC101929147	RP11-418J17.1	uncharacterized LOC101929147	NR_125974.1, NR_125977.1, NR_125975.1, NR_125976.1
GeneID:57393	TMEM27	X	15627316	15665031	37715	-	8	NDMM_1::16771, NDMM_2::15639, NDMM_3::11970, LRMM_1::20080, LRMM_2::19042, LRMM_3::12488, NDMM_4::20329, LRMM_4::18794	-9945, -10233, -9993, -9929, -10233, -9945, -9945, -9945	upstream, upstream, upstream, upstream, upstream, upstream, upstream, upstream	1	1	1	1	1	1	1	1	119	68	71	131	124	70	66	171	1	LRMM_4	171	Gene TMEM27	NX-17, NX17, TMEM27	transmembrane protein 27	NM_020665.5		NP_065716.1
GeneID:64344	HIF3A	19	46297046	46343433	46387	+	8	NDMM_1::7963, NDMM_2::7351, NDMM_3::5753, LRMM_1::9284, LRMM_2::8855, LRMM_3::5991, NDMM_4::9452, LRMM_4::9316	50090, 50058, 50090, 50250, 50218, 50218, 50058, 50186	downstream, downstream, downstream, downstream, downstream, downstream, downstream, downstream	1	1	1	1	1	1	1	1	97	55	28	117	136	69	52	171	1	LRMM_4	171	Gene HIF3A	HIF-3A4, HIF-3A2, IPAS, HIF-3A, bHLHe17, HIF3A, MOP7, PASD7	hypoxia inducible factor 3 alpha subunit	NM_152794.3, NM_022462.4, NM_152795.3, NM_152796.2, XM_006723325.1, XM_005259152.3, XM_005259153.2, XM_005259154.3, XM_005259155.3, XM_005259156.3, XR_935849.1		NP_690007.1, NP_071907.4, NP_690008.2, NP_690009.1, XP_006723388.1
GeneID:5536	PPP5C	19	46346994	46390975	43981	+	8	NDMM_1::7963, NDMM_2::7351, NDMM_3::5753, LRMM_1::9284, LRMM_2::8855, LRMM_3::5991, NDMM_4::9452, LRMM_4::9316	142, 110, 142, 302, 270, 270, 110, 238	in gene, in gene, in gene, in gene, in gene, in gene, in gene, in gene	1	1	1	1	1	1	1	1	97	55	28	117	136	69	52	171	1	LRMM_4	171	Gene PPP5C	PPP5C, FLJ36922, PPP5, PP5, FLJ55954	protein phosphatase 5 catalytic subunit	NM_006247.3, NM_001204284.1		NP_006238.1, NP_001191213.1
GeneID:541578	CXorf40B	X	149924157	149938850	14693	-	16	NDMM_1::17069, NDMM_2::16001, NDMM_3::12200, LRMM_1::20502, LRMM_1::20503, LRMM_1::20504, LRMM_2::19451, LRMM_2::19452, LRMM_3::12711, LRMM_3::12712, NDMM_4::20783, NDMM_4::20784, NDMM_4::20785, LRMM_4::19287, LRMM_4::19288, LRMM_4::19289	418, 482, 418, 994, 418, -1086, 322, -1086, 450, -1214, 386, -1070, -1438, 322, -1086, -1566	in gene, in gene, in gene, in gene, in gene, upstream, in gene, upstream, in gene, upstream, in gene, upstream, upstream, in gene, upstream, upstream	1	1	1	1	1	1	1	1	32.5	41.5	21	50.5	100.5	45	33.5	171	2	LRMM_4	251	Gene CXorf40B	CXorf40B	chromosome X open reading frame 40B	NM_001013845.1, XM_005274698.1, XM_005274699.1, XM_005274700.1, XM_005274701.1, XM_005274702.2, XM_011531180.1, XM_006724826.2, XM_011531181.1		NP_001013867.1, XP_005274755.1, XP_005274756.1, XP_005274757.1, XP_005274758.1
GeneID:101927685	LOC101927685	X	149929624	149931821	2197	+	16	NDMM_1::17069, NDMM_2::16001, NDMM_3::12200, LRMM_1::20502, LRMM_1::20503, LRMM_1::20504, LRMM_2::19451, LRMM_2::19452, LRMM_3::12711, LRMM_3::12712, NDMM_4::20783, NDMM_4::20784, NDMM_4::20785, LRMM_4::19287, LRMM_4::19288, LRMM_4::19289	8808, 8744, 8808, 8232, 8808, 10312, 8904, 10312, 8776, 10440, 8840, 10296, 10664, 8904, 10312, 10792	downstream, downstream, downstream, downstream, downstream, downstream, downstream, downstream, downstream, downstream, downstream, downstream, downstream, downstream, downstream, downstream	1	1	1	1	1	1	1	1	32.5	41.5	21	50.5	100.5	45	33.5	171	2	LRMM_4	251	Gene LOC101927685		heat shock transcription factor, X-linked-like	XM_005276721.3, XM_005274773.3
GeneID:100272228	LINC00894	X	149938548	150016787	78239	+	16	NDMM_1::17069, NDMM_2::16001, NDMM_3::12200, LRMM_1::20502, LRMM_1::20503, LRMM_1::20504, LRMM_2::19451, LRMM_2::19452, LRMM_3::12711, LRMM_3::12712, NDMM_4::20783, NDMM_4::20784, NDMM_4::20785, LRMM_4::19287, LRMM_4::19288, LRMM_4::19289	-116, -180, -116, -692, -116, 1388, -20, 1388, -148, 1516, -84, 1372, 1740, -20, 1388, 1868	upstream, upstream, upstream, upstream, upstream, in gene, upstream, in gene, upstream, in gene, upstream, in gene, in gene, upstream, in gene, in gene	1	1	1	1	1	1	1	1	32.5	41.5	21	50.5	100.5	45	33.5	171	2	LRMM_4	251	Gene LINC00894	RP13-507I23.1, FLJ44451, FLJ30251, LINC00894	long intergenic non-protein coding RNA 894	NR_027456.1
GeneID:728637	MEIKIN	5	131806990	131945698	138708	-	8	NDMM_1::12924, NDMM_2::12235, NDMM_3::9291, LRMM_1::15249, LRMM_2::14919, LRMM_3::9763, NDMM_4::15574, LRMM_4::14709	148898, 149058, 149106, 148770, 148930, 148834, 148450, 148450	downstream, downstream, downstream, downstream, downstream, downstream, downstream, downstream	1	1	1	1	1	1	1	1	74	48	42	114	121	117	49	170	1	LRMM_4	170	Gene MEIKIN	MEIKIN	meiotic kinetochore factor	NM_001303622.1		NP_001290551.1
GeneID:4793	NFKBIB	19	38899657	38908894	9237	+	8	NDMM_1::7816, NDMM_2::7220, NDMM_3::5665, LRMM_1::9137, LRMM_2::8726, LRMM_3::5879, NDMM_4::9286, LRMM_4::9127	151, -137, -9, 23, 391, 103, 55, 23	in gene, upstream, upstream, in gene, in gene, in gene, in gene, in gene	1	1	1	1	1	1	1	1	86	62	33	81	75	37	26	170	1	LRMM_4	170	Gene NFKBIB	IKBB, NFKBIB, TRIP9	NFKB inhibitor beta	NM_001243116.1, NM_002503.4, NR_040515.1, XM_006723226.2, XM_006723227.2		NP_001230045.1, NP_002494.2
GeneID:643669	CCER2	19	38908980	38914370	5390	-	8	NDMM_1::7816, NDMM_2::7220, NDMM_3::5665, LRMM_1::9137, LRMM_2::8726, LRMM_3::5879, NDMM_4::9286, LRMM_4::9127	14562, 14850, 14722, 14690, 14322, 14610, 14658, 14690	downstream, downstream, downstream, downstream, downstream, downstream, downstream, downstream	1	1	1	1	1	1	1	1	86	62	33	81	75	37	26	170	1	LRMM_4	170	Gene CCER2	CCER2	coiled-coil glutamate rich protein 2	NM_001243212.1, XM_011527217.1, XM_011527218.1, XM_011527219.1		NP_001230141.1
GeneID:102725254	LOC102725254	19	18204739	18205569	830	+	8	NDMM_1::7663, NDMM_2::7087, NDMM_3::5586, LRMM_1::8970, LRMM_2::8595, LRMM_3::5790, NDMM_4::9089, LRMM_4::8952	-259, -547, -547, -547, -547, -259, -547, -547	upstream, upstream, upstream, upstream, upstream, upstream, upstream, upstream	1	1	1	1	1	1	1	1	96	39	36	117	210	46	24	170	1	LRMM_1	210	Gene LOC102725254		uncharacterized LOC102725254	XR_433547.2, XR_936364.1
GeneID:51198	CDKN2A-AS1	9	21967139	21967754	615	+	6	NDMM_2::15061, NDMM_3::11546, LRMM_1::19198, LRMM_3::12031, NDMM_4::19475, LRMM_4::18014	-1635, -1539, -1875, -1731, -1635, -1635	upstream, upstream, upstream, upstream, upstream, upstream	0	1	1	1	1	0	1	1	11	37	13	27	13	3	17	170	1	LRMM_4	170	Gene CDKN2A-AS1	CDKN2A-AS1, bA149I2.3, C9orf53	CDKN2A antisense RNA 1 (head to head)	NR_024274.1
GeneID:3021	H3F3B	17	75776434	75779935	3501	-	15	NDMM_1::6947, NDMM_1::6948, NDMM_2::6414, NDMM_2::6415, NDMM_3::5158, LRMM_1::8034, LRMM_1::8035, LRMM_2::7801, LRMM_2::7802, LRMM_3::5266, LRMM_3::5267, NDMM_4::8127, NDMM_4::8128, LRMM_4::8075, LRMM_4::8076	287, -5217, 170, -5217, -5185, 31, -4993, -17, -5217, 31, -5329, -1, -5217, -1, -5217	in gene, upstream, in gene, upstream, upstream, in gene, upstream, upstream, upstream, in gene, upstream, upstream, upstream, upstream, upstream	1	1	1	1	1	1	1	1	71.5	51	48.5	108	161	69.5	50.5	169.5	2	LRMM_1	228	Gene H3F3B	H3.3B, H3F3A, H3F3B	H3 histone, family 3B (H3.3B)	NM_005324.4		NP_005315.1
GeneID:100616282	MIR4738	17	75784521	75784607	86	-	15	NDMM_1::6947, NDMM_1::6948, NDMM_2::6414, NDMM_2::6415, NDMM_3::5158, LRMM_1::8034, LRMM_1::8035, LRMM_2::7801, LRMM_2::7802, LRMM_3::5266, LRMM_3::5267, NDMM_4::8127, NDMM_4::8128, LRMM_4::8075, LRMM_4::8076	4959, -545, 4842, -545, -513, 4703, -321, 4655, -545, 4703, -657, 4671, -545, 4671, -545	downstream, upstream, downstream, upstream, upstream, downstream, upstream, downstream, upstream, downstream, upstream, downstream, upstream, downstream, upstream	1	1	1	1	1	1	1	1	71.5	51	48.5	108	161	69.5	50.5	169.5	2	LRMM_1	228	Gene MIR4738	MIR4738	microRNA 4738
GeneID:9406	ZRANB2	1	71063291	71081289	17998	-	8	NDMM_1::587, NDMM_2::591, NDMM_3::432, LRMM_1::692, LRMM_2::629, LRMM_3::466, NDMM_4::583, LRMM_4::700	73, 105, 41, 105, 73, 89, 73, 105	in gene, in gene, in gene, in gene, in gene, in gene, in gene, in gene	1	1	1	1	1	1	1	1	82	104	61	77	159	74	77	169	1	LRMM_4	169	Gene ZRANB2	ZIS, ZIS2, DKFZp686J1831, FLJ41119, ZIS1, ZNF265, ZRANB2, DKFZp686N09117	zinc finger RANBP2-type containing 2	NM_005455.4, NM_203350.2, XR_246307.1		NP_005446.2, NP_976225.1
GeneID:100852410	ZRANB2-AS2	1	71081324	71237723	156399	+	8	NDMM_1::587, NDMM_2::591, NDMM_3::432, LRMM_1::692, LRMM_2::629, LRMM_3::466, NDMM_4::583, LRMM_4::700	-108, -140, -76, -140, -108, -124, -108, -140	upstream, upstream, upstream, upstream, upstream, upstream, upstream, upstream	1	1	1	1	1	1	1	1	82	104	61	77	159	74	77	169	1	LRMM_4	169	Gene ZRANB2-AS2	ZRANB2-AS2	ZRANB2 antisense RNA 2 (head to head)	NR_046217.1
GeneID:105378795	LOC105378795	1	71083811	71088902	5091	-	8	NDMM_1::587, NDMM_2::591, NDMM_3::432, LRMM_1::692, LRMM_2::629, LRMM_3::466, NDMM_4::583, LRMM_4::700	7686, 7718, 7654, 7718, 7686, 7702, 7686, 7718	downstream, downstream, downstream, downstream, downstream, downstream, downstream, downstream	1	1	1	1	1	1	1	1	82	104	61	77	159	74	77	169	1	LRMM_4	169	Gene LOC105378795		uncharacterized LOC105378795	XR_958157.1, XR_947503.1
GeneID:55854	ZC3H15	2	186486158	186509361	23203	+	8	NDMM_1::9131, NDMM_2::8503, NDMM_3::6615, LRMM_1::10732, LRMM_2::10181, LRMM_3::6916, NDMM_4::10972, LRMM_4::10687	18, 210, 18, 18, -14, 306, 18, 18	in gene, in gene, in gene, in gene, upstream, in gene, in gene, in gene	1	1	1	1	1	1	1	1	122	79	94	183	267	134	69	168	1	LRMM_1	267	Gene ZC3H15	HT010, ZC3H15, MSTP012, LEREPO4	zinc finger CCCH-type containing 15	NM_018471.2, XM_011511485.1		NP_060941.2
GeneID:60385	TSKS	19	49739753	49763328	23575	-	8	NDMM_1::8034, NDMM_2::7405, NDMM_3::5795, LRMM_1::9363, LRMM_2::8924, LRMM_3::6038, NDMM_4::9544, LRMM_4::9416	-3200, -3232, -3264, -3264, -3264, -3264, -3264, -3264	upstream, upstream, upstream, upstream, upstream, upstream, upstream, upstream	1	1	1	1	1	1	1	1	59	45	38	115	126	57	52	168	1	LRMM_4	168	Gene TSKS	TSKS, TSSKS, STK22S1, TSKS1, PPP1R161	testis specific serine kinase substrate	NM_021733.1, XM_011527201.1, XM_011527202.1, XM_011527203.1, XM_005259130.2		NP_068379.1
GeneID:105372434	LOC105372434	19	49748412	49757894	9482	+	8	NDMM_1::8034, NDMM_2::7405, NDMM_3::5795, LRMM_1::9363, LRMM_2::8924, LRMM_3::6038, NDMM_4::9544, LRMM_4::9416	18116, 18148, 18180, 18180, 18180, 18180, 18180, 18180	downstream, downstream, downstream, downstream, downstream, downstream, downstream, downstream	1	1	1	1	1	1	1	1	59	45	38	115	126	57	52	168	1	LRMM_4	168	Gene LOC105372434		uncharacterized LOC105372434	XR_919696.1, XR_936019.1
GeneID:105370887	LOC105370887	15	72274680	72284233	9553	+	8	NDMM_1::5516, NDMM_2::5029, NDMM_3::4078, LRMM_1::6217, LRMM_2::6108, LRMM_3::4161, NDMM_4::6320, LRMM_4::6238	-2200, -2200, -1880, -2008, -2200, -2200, -1880, -1880	upstream, upstream, upstream, upstream, upstream, upstream, upstream, upstream	1	1	1	1	1	1	1	1	77	49	38	90	107	58	39	168	1	LRMM_4	168	Gene LOC105370887		uncharacterized LOC105370887	XR_916511.1, XR_916512.1, XR_932440.1, XR_932441.1
GeneID:10978	CLP1	11	57657744	57661865	4121	+	18	NDMM_1::2545, NDMM_1::2546, NDMM_2::2565, NDMM_2::2566, NDMM_3::2013, NDMM_3::2014, LRMM_1::3198, LRMM_1::3199, LRMM_2::3117, LRMM_2::3118, LRMM_3::2090, LRMM_3::2091, NDMM_4::3026, NDMM_4::3027, NDMM_4::3028, LRMM_4::3087, LRMM_4::3088, LRMM_4::3089	-272, 9936, -80, 9936, -144, 9861, -112, 9936, -16, 9936, -176, 9936, -9280, -80, 9936, -160, 9328, 9936	upstream, downstream, upstream, downstream, upstream, downstream, upstream, downstream, upstream, downstream, upstream, downstream, upstream, upstream, downstream, upstream, downstream, downstream	1	1	1	1	1	1	1	1	69.667	58	34	112	149	47.667	40.667	167.667	3	LRMM_1	379	Gene CLP1	PCH10, HEAB, hClp1, CLP1	cleavage and polyadenylation factor I subunit 1	NM_006831.2, NM_001142597.1		NP_006822.1, NP_001136069.1
GeneID:102465512	MIR6851	9	33467869	33467935	66	-	10	NDMM_1::16163, NDMM_2::15102, NDMM_3::11575, LRMM_1::19265, LRMM_1::19266, LRMM_2::18395, LRMM_3::12066, NDMM_4::19535, LRMM_4::18083, LRMM_4::18084	-6017, -6028, -6081, 10271, -6017, -6049, -6081, -6017, 1247, -6081	upstream, upstream, upstream, downstream, upstream, upstream, upstream, upstream, downstream, upstream	1	1	1	1	1	1	1	1	49	33.667	22.667	51.667	123.333	10.333	31.333	167.667	3	LRMM_4	329	Gene MIR6851	MIR6851, hsa-mir-6851	microRNA 6851
GeneID:23089	PEG10	7	94656325	94669695	13370	+	8	NDMM_1::14925, NDMM_2::13909, NDMM_3::10666, LRMM_1::17475, LRMM_2::17073, LRMM_3::11195, NDMM_4::17890, LRMM_4::16733	2043, 1883, 2091, 2107, 2139, 2107, 1947, 1787	in gene, in gene, in gene, in gene, in gene, in gene, in gene, in gene	1	1	1	1	1	1	1	1	58	45	56	155	96	84	75	167	1	LRMM_4	167	Gene PEG10	MEF3L, PEG10, HB-1, RGAG3, Edr, Mart2, KIAA1051, Mar2, EDR	paternally expressed 10	NM_001040152.1, NM_015068.3, NM_001184961.1, NM_001184962.1, NM_001172437.2, NM_001172438.2		NP_001035242.1, NP_055883.2, NP_001171890.1, NP_001171891.1, NP_001165908.1, NP_001165909.1
GeneID:5203	PFDN4	20	54207963	54219953	11990	+	9	NDMM_1::9788, NDMM_2::9182, NDMM_3::7114, LRMM_1::11685, LRMM_2::10992, LRMM_3::7468, LRMM_3::7469, NDMM_4::11864, LRMM_4::11459	37, 5, -27, -27, -11, -11, 469, -11, -11	in gene, in gene, upstream, upstream, upstream, upstream, in gene, upstream, upstream	1	1	1	1	1	1	1	1	75	96	19	133	150	80	53	167	1	LRMM_4	167	Gene PFDN4	C1, PFD4, PFDN4	prefoldin subunit 4	NM_002623.3		NP_002614.2
GeneID:30968	STOML2	9	35099776	35103195	3419	-	22	NDMM_1::16182, NDMM_1::16183, NDMM_1::16184, NDMM_2::15116, NDMM_2::15117, NDMM_3::11589, NDMM_3::11590, NDMM_3::11591, LRMM_1::19295, LRMM_1::19296, LRMM_1::19297, LRMM_2::18409, LRMM_2::18410, LRMM_3::12081, LRMM_3::12082, LRMM_3::12083, NDMM_4::19558, NDMM_4::19559, NDMM_4::19560, LRMM_4::18116, LRMM_4::18117, LRMM_4::18118	6747, -101, -8517, 6779, -197, 6715, 443, -133, 6747, -197, -8485, 6667, -197, 6726, -197, -8485, 6747, -197, -8549, 6747, -101, -8549	downstream, upstream, upstream, downstream, upstream, downstream, in gene, upstream, downstream, upstream, upstream, downstream, upstream, downstream, upstream, upstream, downstream, upstream, upstream, downstream, upstream, upstream	1	1	1	1	1	1	1	1	46	40	23.333	64	93	28.667	27.667	167	3	LRMM_4	183	Gene STOML2	HSPC108, SLP-2, STOML2	stomatin like 2	NM_001287031.1, NM_001287032.1, NM_001287033.1, NM_013442.2		NP_001273960.1, NP_001273961.1, NP_001273962.1, NP_038470.1
GeneID:1054	CEBPG	19	33373669	33382686	9017	+	8	NDMM_1::7742, NDMM_2::7152, NDMM_3::5629, LRMM_1::9052, LRMM_2::8658, LRMM_3::5832, NDMM_4::9201, LRMM_4::9045	251, 155, 155, 155, 155, 155, 27, 155	in gene, in gene, in gene, in gene, in gene, in gene, in gene, in gene	1	1	1	1	1	1	1	1	90	61	95	61	108	52	79	166	1	LRMM_4	166	Gene CEBPG	IG/EBP-1, CEBPG, GPE1BP		NM_001252296.1, NM_001806.3		NP_001239225.1, NP_001797.1
GeneID:54494	C11orf71	11	114391448	114400550	9102	-	8	NDMM_1::3052, NDMM_2::2993, NDMM_3::2335, LRMM_1::3773, LRMM_2::3615, LRMM_3::2441, NDMM_4::3562, LRMM_4::3639	262, 262, 134, 150, 262, 118, 166, 102	in gene, in gene, in gene, in gene, in gene, in gene, in gene, in gene	1	1	1	1	1	1	1	1	115	74	51	121	206	66	64	166	1	LRMM_1	206	Gene C11orf71	FLJ20010, C11orf71, URLC7	chromosome 11 open reading frame 71	NM_019021.3, NM_001271562.1		NP_061894.2, NP_001258491.1
GeneID:10179	RBM7	11	114400529	114410610	10081	+	8	NDMM_1::3052, NDMM_2::2993, NDMM_3::2335, LRMM_1::3773, LRMM_2::3615, LRMM_3::2441, NDMM_4::3562, LRMM_4::3639	-241, -241, -113, -129, -241, -97, -145, -81	upstream, upstream, upstream, upstream, upstream, upstream, upstream, upstream	1	1	1	1	1	1	1	1	115	74	51	121	206	66	64	166	1	LRMM_1	206	Gene RBM7	RBM7, FLJ11153	RNA binding motif protein 7	NM_001286045.1, NM_001286047.1, NM_016090.3, NM_001286048.1, NM_001286046.1		NP_001272974.1, NP_001272976.1, NP_057174.1, NP_001272977.1, NP_001272975.1
GeneID:3703	STT3A	11	125592795	125622759	29964	+	16	NDMM_1::3148, NDMM_1::3149, NDMM_2::3076, NDMM_2::3077, NDMM_3::2387, NDMM_3::2388, LRMM_1::3859, LRMM_1::3860, LRMM_2::3696, LRMM_2::3697, LRMM_3::2497, LRMM_3::2498, NDMM_4::3646, NDMM_4::3647, LRMM_4::3734, LRMM_4::3735	-155, 32901, -187, 32997, -155, 33029, -347, 32901, -123, 32901, -139, 32997, -155, 32997, -123, 32997	upstream, downstream, upstream, downstream, upstream, downstream, upstream, downstream, upstream, downstream, upstream, downstream, upstream, downstream, upstream, downstream	1	1	1	1	1	1	1	1	90	70	53.5	131	132	73	55	166	2	LRMM_4	192	Gene STT3A	STT3A, STT3-A, ITM1, MGC9042, FLJ27038, TMC	STT3A, catalytic subunit of the oligosaccharyltransferase complex	NM_001278504.1, NM_152713.4, NM_001278503.1, XM_011542807.1, XM_011542808.1		NP_001265433.1, NP_689926.1, NP_001265432.1
GeneID:9256	BZRAP1	17	58301227	58328795	27568	-	19	NDMM_1::6811, NDMM_2::6267, NDMM_3::5048, LRMM_1::7843, LRMM_1::7844, LRMM_1::7845, LRMM_2::7627, LRMM_2::7628, NDMM_4::7943, NDMM_4::7944, NDMM_4::7945, LRMM_4::7818, LRMM_4::7819, LRMM_4::7820, LRMM_4::7821, LRMM_4::7822, LRMM_4::7823, LRMM_4::7824, LRMM_4::7825	-9189, -9221, -9221, -3109, -3589, -9221, -7301, -9093, -3685, -7301, -9253, 24283, 11035, 9467, -805, -3717, -4197, -7301, -9253	upstream, upstream, upstream, upstream, upstream, upstream, upstream, upstream, upstream, upstream, upstream, in gene, in gene, in gene, upstream, upstream, upstream, upstream, upstream	1	1	1	1	1	1	0	1	31.333	33.222	28.444	53.444	75.222	53.889	14.375	165.556	9	LRMM_4	462	Gene BZRAP1	RIMBP1, KIAA0612, RIM-BP1, PRAX-1, BZRAP1, PRAX1, DKFZp686F02123	benzodiazepine receptor (peripheral) associated protein 1	NM_001261835.1, NM_004758.3, NM_024418.2, XM_006722173.2, XM_006722174.2, XM_005257807.2, XR_934597.1, XM_006722175.2, XR_934598.1, XR_934599.1, XM_006722176.2, XM_006722177.2, XM_006722178.2, XM_011525471.1, XM_011525472.1		NP_001248764.1, NP_004749.2, NP_077729.1
GeneID:84461	NEURL4	17	7315632	7329319	13687	-	32	NDMM_1::6389, NDMM_1::6390, NDMM_1::6391, NDMM_1::6392, NDMM_2::5852, NDMM_2::5853, NDMM_2::5854, NDMM_2::5855, NDMM_3::4706, NDMM_3::4707, NDMM_3::4708, LRMM_1::7271, LRMM_1::7272, LRMM_1::7273, LRMM_1::7274, LRMM_2::7099, LRMM_2::7100, LRMM_2::7101, LRMM_2::7102, LRMM_3::4821, LRMM_3::4822, LRMM_3::4823, LRMM_3::4824, NDMM_4::7373, NDMM_4::7374, NDMM_4::7375, NDMM_4::7376, NDMM_4::7377, LRMM_4:…	21863, 20487, 13991, -185, 21831, 14034, -185, -7353, 21879, 20391, -185, 21895, 20439, 14119, -185, 21927, 14087, -217, -7401, 21895, 14151, 13831, -185, 21847, 13991, -185, -7369, -7897, 21895, 20311, 13991, -185	downstream, downstream, downstream, upstream, downstream, downstream, upstream, upstream, downstream, downstream, upstream, downstream, downstream, downstream, upstream, downstream, downstream, upstream, upstream, downstream, downstream, downstream, upstream, downstream, downstream, upstream, upstream, upstream, downstream, downstream, downstream, upstream	1	1	1	1	1	1	1	1	76	43.6	42.4	147.4	88.2	79.4	30.6	165.4	5	LRMM_4	585	Gene NEURL4	KIAA1787, FLJ35680, NEURL4	neuralized E3 ubiquitin protein ligase 4	NM_001005408.1, NM_032442.2		NP_001005408.1, NP_115818.2
GeneID:84720	PIGO	9	35088688	35096601	7913	-	25	NDMM_1::16181, NDMM_1::16182, NDMM_1::16183, NDMM_2::15115, NDMM_2::15116, NDMM_2::15117, NDMM_3::11588, NDMM_3::11589, NDMM_3::11590, NDMM_3::11591, LRMM_1::19294, LRMM_1::19295, LRMM_1::19296, LRMM_2::18408, LRMM_2::18409, LRMM_2::18410, LRMM_3::12080, LRMM_3::12081, LRMM_3::12082, NDMM_4::19557, NDMM_4::19558, NDMM_4::19559, LRMM_4::18115, LRMM_4::18116, LRMM_4::18117	16729, 153, -6695, 16665, 185, -6791, 16665, 121, -6151, -6727, 16729, 153, -6791, 16713, 73, -6791, 16665, 132, -6791, 16697, 153, -6791, 16697, 153, -6695	downstream, in gene, upstream, downstream, in gene, upstream, downstream, in gene, upstream, upstream, downstream, in gene, upstream, downstream, in gene, upstream, downstream, in gene, upstream, downstream, in gene, upstream, downstream, in gene, upstream	1	1	1	1	1	1	1	1	44.333	39	21	57.333	95	28.667	25	165.333	3	LRMM_4	178	Gene PIGO	DKFZp434M222, PIGO, FLJ00135, MGC3079, RP11-182N22.4, HPMRS2, MGC20536	phosphatidylinositol glycan anchor biosynthesis class O	NM_032634.3, NM_152850.3, NM_001201484.1, XR_242515.1, XM_005251619.2, XM_011518056.1		NP_116023.2, NP_690577.2, NP_001188413.1
GeneID:25807	RHBDD3	22	29259855	29268185	8330	-	9	NDMM_1::10172, NDMM_2::9591, NDMM_3::7381, LRMM_1::12207, LRMM_2::11434, LRMM_3::7789, NDMM_4::12416, LRMM_4::11867, LRMM_4::11868	-7, -7, 41, -7, -7, -7, 25, 57, -519	upstream, upstream, in gene, upstream, upstream, upstream, in gene, in gene, upstream	1	1	1	1	1	1	1	1	84	118	54	228	260	126	92	165	1	LRMM_1	260	Gene RHBDD3	RHBDD3, PTAG, HS984G1A, C22orf3	rhomboid domain containing 3	NM_012265.1, XM_011530107.1, XM_006724224.2		NP_036397.1
GeneID:105372986	LOC105372986	22	29260865	29261191	326	+	9	NDMM_1::10172, NDMM_2::9591, NDMM_3::7381, LRMM_1::12207, LRMM_2::11434, LRMM_3::7789, NDMM_4::12416, LRMM_4::11867, LRMM_4::11868	7327, 7327, 7279, 7327, 7327, 7327, 7295, 7263, 7839	downstream, downstream, downstream, downstream, downstream, downstream, downstream, downstream, downstream	1	1	1	1	1	1	1	1	84	118	54	228	260	126	92	165	1	LRMM_1	260	Gene LOC105372986		uncharacterized LOC105372986	XR_920926.1, XR_938138.1
GeneID:285782	CAGE1	6	7326654	7389709	63055	-	8	NDMM_1::13375, NDMM_2::12648, NDMM_3::9567, LRMM_1::15756, LRMM_2::15428, LRMM_3::10078, NDMM_4::16078, LRMM_4::15264	109, 205, 173, 77, 61, 205, 109, 109	in gene, in gene, in gene, in gene, in gene, in gene, in gene, in gene	1	1	1	1	1	1	1	1	86	105	70	141	91	87	50	165	1	LRMM_4	165	Gene CAGE1	CT95, bA69L16.7, CTAG3, CAGE1, FLJ40441	cancer antigen 1	NM_205864.2, NM_001170692.1, NM_001170693.1		NP_995586.1, NP_001164163.1, NP_001164164.1
GeneID:83732	RIOK1	6	7389419	7418037	28618	+	8	NDMM_1::13375, NDMM_2::12648, NDMM_3::9567, LRMM_1::15756, LRMM_2::15428, LRMM_3::10078, NDMM_4::16078, LRMM_4::15264	181, 85, 117, 213, 229, 85, 181, 181	in gene, in gene, in gene, in gene, in gene, in gene, in gene, in gene	1	1	1	1	1	1	1	1	86	105	70	141	91	87	50	165	1	LRMM_4	165	Gene RIOK1	MGC12903, FLJ30006, bA288G3.1, RIOK1, AD034, RRP10		NM_031480.2, NM_153005.1, XM_011514933.1, XM_005249446.2		NP_113668.2, NP_694550.1
GeneID:55791	LRIF1	1	110947190	110964197	17007	-	8	NDMM_1::768, NDMM_2::775, NDMM_3::591, LRMM_1::869, LRMM_2::827, LRMM_3::628, NDMM_4::754, LRMM_4::896	325, 261, 229, 293, 261, 325, 181, 165	in gene, in gene, in gene, in gene, in gene, in gene, in gene, in gene	1	1	1	1	1	1	1	1	54	47	35	62	191	81	42	165	1	LRMM_1	191	Gene LRIF1	RIF1, C1orf103, RP11-96K19.1, FLJ11269, LRIF1	ligand dependent nuclear receptor interacting factor 1	NM_018372.3, NM_001006945.1, XM_005271029.2, XM_011541768.1		NP_060842.3, NP_001006946.1, XP_005271086.1
GeneID:100422938	MIR3142	5	160474444	160474525	81	+	4	NDMM_2::12474, LRMM_2::15222, NDMM_4::15859, LRMM_4::15030	-6444, -6444, -6444, -6444	upstream, upstream, upstream, upstream	0	1	0	1	0	1	0	1	15	62	12	162	14	201	6	165	1	LRMM_2	201	Gene MIR3142	MIR3142	microRNA 3142
GeneID:100151683	RNU4ATAC	2	121530880	121531009	129	+	8	NDMM_1::8870, NDMM_2::8241, NDMM_3::6389, LRMM_1::10377, LRMM_2::9848, LRMM_3::6694, NDMM_4::10582, LRMM_4::10385	-64, -112, -128, -128, -128, -128, -96, -128	upstream, upstream, upstream, upstream, upstream, upstream, upstream, upstream	1	1	1	1	1	1	1	1	90	85	59	125	289	122	98	164	1	LRMM_1	289	Gene RNU4ATAC	TALS, U4ATAC, MOPD1, RNU4ATAC, RNU4ATAC1, RFMN	RNA, U4atac small nuclear (U12-dependent splicing)	NR_023343.1
GeneID:4116	MAGOH	1	53226892	53238610	11718	-	16	NDMM_1::489, NDMM_1::490, NDMM_2::492, NDMM_2::493, NDMM_3::350, NDMM_3::351, NDMM_3::352, LRMM_1::606, LRMM_1::607, LRMM_2::538, LRMM_2::539, LRMM_3::400, NDMM_4::488, NDMM_4::489, LRMM_4::598, LRMM_4::599	18130, -142, 18130, 178, 18130, 226, -110, 18130, 178, 18098, 146, 18130, 18098, 178, 18130, -14	downstream, upstream, downstream, in gene, downstream, in gene, upstream, downstream, in gene, downstream, in gene, downstream, downstream, in gene, downstream, upstream	1	1	1	1	1	1	1	1	69	56	28.5	62.5	129.5	28	41	164	2	LRMM_4	265	Gene MAGOH	MAGOHA, MAGOH1, MAGOH	mago homolog, exon junction complex core component	NM_002370.3		NP_002361.1
GeneID:10155	TRIM28	19	58544469	58550715	6246	+	18	NDMM_1::8147, NDMM_1::8148, NDMM_1::8149, NDMM_2::7519, NDMM_2::7520, NDMM_3::5852, NDMM_3::5853, LRMM_1::9479, LRMM_1::9480, LRMM_2::9014, LRMM_2::9015, LRMM_3::6107, LRMM_3::6108, NDMM_4::9696, NDMM_4::9697, LRMM_4::9523, LRMM_4::9524, LRMM_4::9525	-309, 10795, 14283, -293, 14283, -309, 14347, -309, 14347, -309, 14667, -309, 14283, -309, 14347, -309, 10667, 14347	upstream, downstream, downstream, upstream, downstream, upstream, downstream, upstream, downstream, upstream, downstream, upstream, downstream, upstream, downstream, upstream, downstream, downstream	1	1	1	1	1	1	1	1	93.667	51	32.333	115.667	137	45.667	39.333	164	3	LRMM_4	232	Gene TRIM28	RNF96, TRIM28, FLJ29029, TF1B, TIF1B, KAP1, PPP1R157	tripartite motif containing 28	NM_005762.2		NP_005753.1
GeneID:102465976	MIR6807	19	58550285	58550376	91	+	18	NDMM_1::8147, NDMM_1::8148, NDMM_1::8149, NDMM_2::7519, NDMM_2::7520, NDMM_3::5852, NDMM_3::5853, LRMM_1::9479, LRMM_1::9480, LRMM_2::9014, LRMM_2::9015, LRMM_3::6107, LRMM_3::6108, NDMM_4::9696, NDMM_4::9697, LRMM_4::9523, LRMM_4::9524, LRMM_4::9525	-6125, 4979, 8467, -6109, 8467, -6125, 8531, -6125, 8531, -6125, 8851, -6125, 8467, -6125, 8531, -6125, 4851, 8531	upstream, downstream, downstream, upstream, downstream, upstream, downstream, upstream, downstream, upstream, downstream, upstream, downstream, upstream, downstream, upstream, downstream, downstream	1	1	1	1	1	1	1	1	93.667	51	32.333	115.667	137	45.667	39.333	164	3	LRMM_4	232	Gene MIR6807	hsa-mir-6807, MIR6807	microRNA 6807
GeneID:27243	CHMP2A	19	58551566	58555128	3562	-	18	NDMM_1::8147, NDMM_1::8148, NDMM_1::8149, NDMM_2::7519, NDMM_2::7520, NDMM_3::5852, NDMM_3::5853, LRMM_1::9479, LRMM_1::9480, LRMM_2::9014, LRMM_2::9015, LRMM_3::6107, LRMM_3::6108, NDMM_4::9696, NDMM_4::9697, LRMM_4::9523, LRMM_4::9524, LRMM_4::9525	10968, -136, -3624, 10952, -3624, 10968, -3688, 10968, -3688, 10968, -4008, 10968, -3624, 10968, -3688, 10968, -8, -3688	downstream, upstream, upstream, downstream, upstream, downstream, upstream, downstream, upstream, downstream, upstream, downstream, upstream, downstream, upstream, downstream, upstream, upstream	1	1	1	1	1	1	1	1	93.667	51	32.333	115.667	137	45.667	39.333	164	3	LRMM_4	232	Gene CHMP2A	CHMP2A, BC2, CHMP2, VPS2, VPS2A, BC-2	charged multivesicular body protein 2A	XM_005258746.1, NM_198426.2, NM_014453.3, XM_005258747.2		XP_005258803.1, NP_940818.1, NP_055268.1
GeneID:9791	PTDSS1	8	96261886	96334552	72666	+	12	NDMM_1::15761, NDMM_1::15762, NDMM_2::14693, NDMM_2::14694, NDMM_3::11265, LRMM_1::18612, LRMM_1::18613, LRMM_2::17957, LRMM_3::11763, NDMM_4::18972, NDMM_4::18973, LRMM_4::17568	-190, 1282, -174, 1090, -190, -190, 1090, -190, -142, -126, 1090, -190	upstream, in gene, upstream, in gene, upstream, upstream, in gene, upstream, upstream, upstream, in gene, upstream	1	1	1	1	1	1	1	1	93.5	89.5	68	150.5	277	78	75.5	163	2	LRMM_1	415	Gene PTDSS1	KIAA0024, PTDSS1, PSS1, PSSA, LMHD	phosphatidylserine synthase 1	NM_014754.2, NM_001290225.1		NP_055569.1, NP_001277154.1
GeneID:105375652	LOC105375652	8	96264673	96284001	19328	-	12	NDMM_1::15761, NDMM_1::15762, NDMM_2::14693, NDMM_2::14694, NDMM_3::11265, LRMM_1::18612, LRMM_1::18613, LRMM_2::17957, LRMM_3::11763, NDMM_4::18972, NDMM_4::18973, LRMM_4::17568	22305, 20833, 22289, 21025, 22305, 22305, 21025, 22305, 22257, 22241, 21025, 22305	downstream, downstream, downstream, downstream, downstream, downstream, downstream, downstream, downstream, downstream, downstream, downstream	1	1	1	1	1	1	1	1	93.5	89.5	68	150.5	277	78	75.5	163	2	LRMM_1	415	Gene LOC105375652		uncharacterized LOC105375652	XR_957344.1, XR_928431.1
GeneID:5515	PPP2CA	5	134196457	134226259	29802	-	9	NDMM_1::12952, NDMM_2::12263, NDMM_3::9312, LRMM_1::15287, LRMM_2::14956, LRMM_3::9788, LRMM_3::9789, NDMM_4::15610, LRMM_4::14743	275, 275, 275, 243, 403, 755, -237, -77, 403	in gene, in gene, in gene, in gene, in gene, in gene, upstream, upstream, in gene	1	1	1	1	1	1	1	1	104	73	60	122	269	126	60	163	1	LRMM_1	269	Gene PPP2CA	PPP2CA, RP-C, PP2CA, PP2Calpha, PP2Ac	protein phosphatase 2 catalytic subunit alpha	NM_002715.2		NP_002706.1
GeneID:100500905	MIR3661	5	134225757	134225852	95	+	9	NDMM_1::12952, NDMM_2::12263, NDMM_3::9312, LRMM_1::15287, LRMM_2::14956, LRMM_3::9788, LRMM_3::9789, NDMM_4::15610, LRMM_4::14743	227, 227, 227, 259, 99, -253, 739, 579, 99	downstream, downstream, downstream, downstream, downstream, upstream, downstream, downstream, downstream	1	1	1	1	1	1	1	1	104	73	60	122	269	126	60	163	1	LRMM_1	269	Gene MIR3661	MIR3661, mir-3661	microRNA 3661
GeneID:100652853	LINC01023	5	108727825	108728261	436	-	8	NDMM_1::12790, NDMM_2::12130, NDMM_3::9210, LRMM_1::15124, LRMM_2::14758, LRMM_3::9678, NDMM_4::15450, LRMM_4::14590	-27, 5, 5, -27, -27, -11, -27, -27	upstream, in gene, in gene, upstream, upstream, upstream, upstream, upstream	1	1	1	1	1	1	1	1	124	83	80	130	91	147	53	163	1	LRMM_4	163	Gene LINC01023	HP07349, LINC01023, FLJ44485	long intergenic non-protein coding RNA 1023	NR_046368.1
GeneID:101929548	FOCAD-AS1	9	20683302	20684750	1448	-	8	NDMM_1::16106, NDMM_2::15057, NDMM_3::11540, LRMM_1::19191, LRMM_2::18341, LRMM_3::12027, NDMM_4::19470, LRMM_4::18003	366, 398, 366, 398, 558, 430, 462, 398	in gene, in gene, in gene, in gene, in gene, in gene, in gene, in gene	1	1	1	1	1	1	1	1	64	46	43	65	147	55	50	163	1	LRMM_4	163	Gene FOCAD-AS1	FOCAD-AS1	FOCAD antisense RNA 1	NR_121601.1
GeneID:150737	TTC30B	2	177550152	177552796	2644	-	8	NDMM_1::9094, NDMM_2::8466, NDMM_3::6588, LRMM_1::10689, LRMM_2::10130, LRMM_3::6879, NDMM_4::10916, LRMM_4::10647	-100, -100, -100, -100, -100, -84, -100, -132	upstream, upstream, upstream, upstream, upstream, upstream, upstream, upstream	1	1	1	1	1	1	1	1	56	81	69	182	153	111	45	163	1	NDMM_4	182	Gene TTC30B	IFT70, TTC30B, IFT70B, FLJ30990, fleer	tetratricopeptide repeat domain 30B	NM_152517.2		NP_689730.2
GeneID:3105	HLA-A	6	29942470	29945884	3414	+	8	NDMM_1::13553, NDMM_2::12833, NDMM_3::9698, LRMM_1::15915, LRMM_2::15610, LRMM_3::10209, NDMM_4::16319, LRMM_4::15461	-166, -134, -102, 58, -102, -134, -134, -70	upstream, upstream, upstream, in gene, upstream, upstream, upstream, upstream	1	1	1	1	1	1	1	1	107	89	76	151	63	64	59	162	1	LRMM_4	162	Gene HLA-A	HLAA, Aw-69, Aw-74, HLA-A, Aw-68, FLJ26655, Aw-33	major histocompatibility complex, class I, A	NM_001242758.1, NM_002116.7, XR_430999.1, XM_011548124.1, XM_005275331.2		NP_001229687.1, NP_002107.3
GeneID:10423	CDIPT	16	29858356	29863288	4932	-	8	NDMM_1::6069, NDMM_2::5467, NDMM_3::4371, LRMM_1::6799, LRMM_2::6591, LRMM_3::4499, NDMM_4::6904, LRMM_4::6826	-120, -136, -136, -136, -136, -120, -136, -136	upstream, upstream, upstream, upstream, upstream, upstream, upstream, upstream	1	1	1	1	1	1	1	1	97	94	42	184	137	77	55	162	1	NDMM_4	184	Gene CDIPT	PIS, CDIPT, MGC1328, PIS1		NM_006319.4, NM_001286585.1, NM_001286586.1, XM_005255038.3		NP_006310.1, NP_001273514.1, NP_001273515.1
GeneID:55706	NDC1	1	53765460	53838552	73092	-	8	NDMM_1::493, NDMM_2::496, NDMM_3::355, LRMM_1::611, LRMM_2::542, LRMM_3::403, NDMM_4::492, LRMM_4::602	184, 184, 280, 152, 168, 184, 152, 184	in gene, in gene, in gene, in gene, in gene, in gene, in gene, in gene	1	1	1	1	1	1	1	1	71	58	27	64	90	54	45	162	1	LRMM_4	162	Gene NDC1	FLJ12556, FLJ10407, NET3, TMEM48, NDC1, FLJ34120	NDC1 transmembrane nucleoporin	NR_033142.1, NM_018087.4, NM_001168551.1, XM_011541766.1, XM_006710762.2		NP_060557.3, NP_001162023.1
GeneID:100500831	MIR3912	5	171386656	171386760	104	-	8	NDMM_1::13193, NDMM_2::12491, NDMM_3::9473, LRMM_1::15577, LRMM_2::15248, LRMM_3::9957, NDMM_4::15894, LRMM_4::15045	-888, -1048, -888, -888, -888, -920, -872, -888	upstream, upstream, upstream, upstream, upstream, upstream, upstream, upstream	1	1	1	1	1	1	1	1	95	50	35	102	138	56	35	162	1	LRMM_4	162	Gene MIR3912	mir-3912, MIR3912	microRNA 3912
GeneID:4869	NPM1	5	171387648	171410884	23236	+	8	NDMM_1::13193, NDMM_2::12491, NDMM_3::9473, LRMM_1::15577, LRMM_2::15248, LRMM_3::9957, NDMM_4::15894, LRMM_4::15045	0, 160, 0, 0, 0, 32, -16, 0	in gene, in gene, in gene, in gene, in gene, in gene, upstream, in gene	1	1	1	1	1	1	1	1	95	50	35	102	138	56	35	162	1	LRMM_4	162	Gene NPM1	NPM1, B23, NPM, MGC104254	nucleophosmin (nucleolar phosphoprotein B23, numatrin)	NM_002520.6, NM_199185.3, NM_001037738.2, XM_011534564.1, XM_005265920.2		NP_002511.1, NP_954654.1, NP_001032827.1
GeneID:2828	GPR4	19	45589764	45602208	12444	-	8	NDMM_1::7950, NDMM_2::7340, NDMM_3::5746, LRMM_1::9266, LRMM_2::8846, LRMM_3::5977, NDMM_4::9436, LRMM_4::9295	17600, 17568, 17536, 17600, 17536, 17536, 17568, 17600	downstream, downstream, downstream, downstream, downstream, downstream, downstream, downstream	1	1	1	1	1	1	1	1	87	52	37	121	102	59	30	162	1	LRMM_4	162	Gene GPR4	GPR4		NM_005282.2		NP_005273.1
GeneID:54826	GIN1	5	103086000	103120169	34169	-	8	NDMM_1::12764, NDMM_2::12112, NDMM_3::9203, LRMM_1::15096, LRMM_2::14729, LRMM_3::9666, NDMM_4::15423, LRMM_4::14568	169, 41, -87, 169, 169, 169, 105, 137	in gene, in gene, upstream, in gene, in gene, in gene, in gene, in gene	1	1	1	1	1	1	1	1	94	58	49	136	235	135	63	161	1	LRMM_1	235	Gene GIN1	GIN-1, FLJ20125, ZH2C2, TGIN1, GIN1	gypsy retrotransposon integrase 1	NM_017676.2, XM_005272028.2, XM_005272029.2		NP_060146.2
GeneID:100506046	GAS5-AS1	1	173863248	173863941	693	+	10	NDMM_1::1154, NDMM_2::1162, NDMM_3::894, NDMM_3::895, LRMM_1::1445, LRMM_2::1396, LRMM_3::1004, LRMM_3::1005, NDMM_4::1242, LRMM_4::1460	5152, 4848, 4688, 5424, 5072, 4912, 4560, 5040, 5296, 5232	downstream, downstream, downstream, downstream, downstream, downstream, downstream, downstream, downstream, downstream	1	1	1	1	1	1	1	1	44	44	44	85	155	90	59	161	1	LRMM_4	161	Gene GAS5-AS1	GAS5-AS1	GAS5 antisense RNA 1	NR_037605.1
GeneID:60674	GAS5	1	173863901	173867987	4086	-	10	NDMM_1::1154, NDMM_2::1162, NDMM_3::894, NDMM_3::895, LRMM_1::1445, LRMM_2::1396, LRMM_3::1004, LRMM_3::1005, NDMM_4::1242, LRMM_4::1460	-413, -109, 51, -685, -333, -173, 179, -301, -557, -493	upstream, upstream, in gene, upstream, upstream, upstream, in gene, upstream, upstream, upstream	1	1	1	1	1	1	1	1	44	44	44	85	155	90	59	161	1	LRMM_4	161	Gene GAS5	GAS5, NCRNA00030, SNHG2	growth arrest specific 5 (non-protein coding)	NR_002578.2
GeneID:26769	SNORD81	1	173864175	173864217	42	-	10	NDMM_1::1154, NDMM_2::1162, NDMM_3::894, NDMM_3::895, LRMM_1::1445, LRMM_2::1396, LRMM_3::1004, LRMM_3::1005, NDMM_4::1242, LRMM_4::1460	-4183, -3879, -3719, -4455, -4103, -3943, -3591, -4071, -4327, -4263	upstream, upstream, upstream, upstream, upstream, upstream, upstream, upstream, upstream, upstream	1	1	1	1	1	1	1	1	44	44	44	85	155	90	59	161	1	LRMM_4	161	Gene SNORD81	U81, RNU104, SNORD81, Z23	small nucleolar RNA, C/D box 81	NR_003938.1
GeneID:26802	SNORD47	1	173864369	173864445	76	-	10	NDMM_1::1154, NDMM_2::1162, NDMM_3::894, NDMM_3::895, LRMM_1::1445, LRMM_2::1396, LRMM_3::1004, LRMM_3::1005, NDMM_4::1242, LRMM_4::1460	-3955, -3651, -3491, -4227, -3875, -3715, -3363, -3843, -4099, -4035	upstream, upstream, upstream, upstream, upstream, upstream, upstream, upstream, upstream, upstream	1	1	1	1	1	1	1	1	44	44	44	85	155	90	59	161	1	LRMM_4	161	Gene SNORD47	U47, RNU47, SNORD47	small nucleolar RNA, C/D box 47	NR_002746.1
GeneID:26774	SNORD80	1	173864833	173864903	70	-	10	NDMM_1::1154, NDMM_2::1162, NDMM_3::894, NDMM_3::895, LRMM_1::1445, LRMM_2::1396, LRMM_3::1004, LRMM_3::1005, NDMM_4::1242, LRMM_4::1460	-3497, -3193, -3033, -3769, -3417, -3257, -2905, -3385, -3641, -3577	upstream, upstream, upstream, upstream, upstream, upstream, upstream, upstream, upstream, upstream	1	1	1	1	1	1	1	1	44	44	44	85	155	90	59	161	1	LRMM_4	161	Gene SNORD80	SNORD80, U80, RNU100, Z15	small nucleolar RNA, C/D box 80	NR_003940.1
GeneID:26770	SNORD79	1	173865350	173865430	80	-	10	NDMM_1::1154, NDMM_2::1162, NDMM_3::894, NDMM_3::895, LRMM_1::1445, LRMM_2::1396, LRMM_3::1004, LRMM_3::1005, NDMM_4::1242, LRMM_4::1460	-2970, -2666, -2506, -3242, -2890, -2730, -2378, -2858, -3114, -3050	upstream, upstream, upstream, upstream, upstream, upstream, upstream, upstream, upstream, upstream	1	1	1	1	1	1	1	1	44	44	44	85	155	90	59	161	1	LRMM_4	161	Gene SNORD79	U79, RNU103, Z22, SNORD79	small nucleolar RNA, C/D box 79	NR_003939.1
GeneID:692198	SNORD78	1	173865633	173865686	53	-	10	NDMM_1::1154, NDMM_2::1162, NDMM_3::894, NDMM_3::895, LRMM_1::1445, LRMM_2::1396, LRMM_3::1004, LRMM_3::1005, NDMM_4::1242, LRMM_4::1460	-2714, -2410, -2250, -2986, -2634, -2474, -2122, -2602, -2858, -2794	upstream, upstream, upstream, upstream, upstream, upstream, upstream, upstream, upstream, upstream	1	1	1	1	1	1	1	1	44	44	44	85	155	90	59	161	1	LRMM_4	161	Gene SNORD78	SNORD78, U78	small nucleolar RNA, C/D box 78	NR_003944.1
GeneID:26806	SNORD44	1	173865968	173866028	60	-	10	NDMM_1::1154, NDMM_2::1162, NDMM_3::894, NDMM_3::895, LRMM_1::1445, LRMM_2::1396, LRMM_3::1004, LRMM_3::1005, NDMM_4::1242, LRMM_4::1460	-2372, -2068, -1908, -2644, -2292, -2132, -1780, -2260, -2516, -2452	upstream, upstream, upstream, upstream, upstream, upstream, upstream, upstream, upstream, upstream	1	1	1	1	1	1	1	1	44	44	44	85	155	90	59	161	1	LRMM_4	161	Gene SNORD44	U44, RNU44, SNORD44	small nucleolar RNA, C/D box 44	NR_002750.2
GeneID:692197	SNORD77	1	173866311	173866371	60	-	10	NDMM_1::1154, NDMM_2::1162, NDMM_3::894, NDMM_3::895, LRMM_1::1445, LRMM_2::1396, LRMM_3::1004, LRMM_3::1005, NDMM_4::1242, LRMM_4::1460	-2029, -1725, -1565, -2301, -1949, -1789, -1437, -1917, -2173, -2109	upstream, upstream, upstream, upstream, upstream, upstream, upstream, upstream, upstream, upstream	1	1	1	1	1	1	1	1	44	44	44	85	155	90	59	161	1	LRMM_4	161	Gene SNORD77	SNORD77, SNORD77A, U77	small nucleolar RNA, C/D box 77	NR_003943.1
GeneID:692196	SNORD76	1	173866635	173866715	80	-	10	NDMM_1::1154, NDMM_2::1162, NDMM_3::894, NDMM_3::895, LRMM_1::1445, LRMM_2::1396, LRMM_3::1004, LRMM_3::1005, NDMM_4::1242, LRMM_4::1460	-1685, -1381, -1221, -1957, -1605, -1445, -1093, -1573, -1829, -1765	upstream, upstream, upstream, upstream, upstream, upstream, upstream, upstream, upstream, upstream	1	1	1	1	1	1	1	1	44	44	44	85	155	90	59	161	1	LRMM_4	161	Gene SNORD76	SNORD76, U76	small nucleolar RNA, C/D box 76	NR_003942.1
GeneID:692195	SNORD75	1	173866879	173866938	59	-	10	NDMM_1::1154, NDMM_2::1162, NDMM_3::894, NDMM_3::895, LRMM_1::1445, LRMM_2::1396, LRMM_3::1004, LRMM_3::1005, NDMM_4::1242, LRMM_4::1460	-1462, -1158, -998, -1734, -1382, -1222, -870, -1350, -1606, -1542	upstream, upstream, upstream, upstream, upstream, upstream, upstream, upstream, upstream, upstream	1	1	1	1	1	1	1	1	44	44	44	85	155	90	59	161	1	LRMM_4	161	Gene SNORD75	SNORD75, U75	small nucleolar RNA, C/D box 75	NR_003941.1
GeneID:619498	SNORD74	1	173867674	173867745	71	-	10	NDMM_1::1154, NDMM_2::1162, NDMM_3::894, NDMM_3::895, LRMM_1::1445, LRMM_2::1396, LRMM_3::1004, LRMM_3::1005, NDMM_4::1242, LRMM_4::1460	-655, -351, -191, -927, -575, -415, -63, -543, -799, -735	upstream, upstream, upstream, upstream, upstream, upstream, upstream, upstream, upstream, upstream	1	1	1	1	1	1	1	1	44	44	44	85	155	90	59	161	1	LRMM_4	161	Gene SNORD74	U74, Z18, SNORD74, SNORD74A	small nucleolar RNA, C/D box 74	NR_002579.1
GeneID:84614	ZBTB37	1	173868082	173887458	19376	+	10	NDMM_1::1154, NDMM_2::1162, NDMM_3::894, NDMM_3::895, LRMM_1::1445, LRMM_2::1396, LRMM_3::1004, LRMM_3::1005, NDMM_4::1242, LRMM_4::1460	318, 14, -146, 590, 238, 78, -274, 206, 462, 398	in gene, in gene, upstream, in gene, in gene, in gene, upstream, in gene, in gene, in gene	1	1	1	1	1	1	1	1	44	44	44	85	155	90	59	161	1	LRMM_4	161	Gene ZBTB37	ZNF908, ZBTB37, MGC2629, D430004I08Rik	zinc finger and BTB domain containing 37	NM_032522.3, NM_001122770.1, XM_005245546.1, XM_006711578.2, XM_006711579.2, XM_011510062.1, XM_011510063.1		NP_115911.1, NP_001116242.1, XP_005245603.1
GeneID:100874246	ARHGAP31-AS1	3	119314293	119322760	8467	-	8	NDMM_1::11038, NDMM_2::10453, NDMM_3::8021, LRMM_1::13230, LRMM_2::12405, LRMM_3::8441, NDMM_4::13430, LRMM_4::12800	-120, -56, -120, -392, -440, -56, -120, -440	upstream, upstream, upstream, upstream, upstream, upstream, upstream, upstream	1	1	1	1	1	1	1	1	83	88	79	72	41	39	59	161	1	LRMM_4	161	Gene ARHGAP31-AS1	ARHGAP31-AS1	ARHGAP31 antisense RNA 1	NR_046748.1
GeneID:6194	RPS6	9	19376256	19380237	3981	-	8	NDMM_1::16088, NDMM_2::15049, NDMM_3::11535, LRMM_1::19178, LRMM_2::18331, LRMM_3::12019, NDMM_4::19457, LRMM_4::17992	-99, 45, -83, -147, -115, -147, -147, -115	upstream, in gene, upstream, upstream, upstream, upstream, upstream, upstream	1	1	1	1	1	1	1	1	39	48	36	87	120	38	40	161	1	LRMM_4	161	Gene RPS6	RPS6, S6		NM_001010.2		NP_001001.2
GeneID:65083	NOL6	9	33461353	33473943	12590	-	21	NDMM_1::16162, NDMM_1::16163, NDMM_2::15101, NDMM_2::15102, NDMM_3::11575, LRMM_1::19263, LRMM_1::19264, LRMM_1::19265, LRMM_1::19266, LRMM_2::18395, LRMM_3::12065, LRMM_3::12066, NDMM_4::19532, NDMM_4::19533, NDMM_4::19534, NDMM_4::19535, LRMM_4::18080, LRMM_4::18081, LRMM_4::18082, LRMM_4::18083, LRMM_4::18084	19543, -9, 19671, -20, -73, 19543, 17847, 16279, -9, -41, 19575, -73, 20919, 19543, 17847, -9, 20887, 19575, 17847, 7255, -73	downstream, upstream, downstream, upstream, upstream, downstream, downstream, downstream, upstream, upstream, downstream, upstream, downstream, downstream, downstream, upstream, downstream, downstream, downstream, in gene, upstream	1	1	1	1	1	1	1	1	37.167	36.167	19.667	52.5	111.333	11.667	33.167	160.833	6	LRMM_4	329	Gene NOL6	FLJ21959, NOL6, MGC14896, MGC14921, bA311H10.1, MGC20838, UTP22, NRAP		NM_022917.4, NM_139235.3		NP_075068.2, NP_631981.2
GeneID:54894	RNF43	17	58353676	58417620	63944	-	23	NDMM_1::6812, NDMM_1::6813, NDMM_1::6814, NDMM_2::6268, NDMM_2::6269, NDMM_2::6270, NDMM_3::5049, NDMM_3::5050, LRMM_1::7846, LRMM_1::7847, LRMM_1::7848, LRMM_2::7629, LRMM_2::7630, LRMM_2::7631, LRMM_3::5156, LRMM_3::5157, NDMM_4::7946, NDMM_4::7947, NDMM_4::7948, LRMM_4::7826, LRMM_4::7827, LRMM_4::7828, LRMM_4::7829	73172, 65300, 34996, 73156, 65172, 35060, 73172, 65172, 65236, 34980, -92, 73172, 65172, 35012, 73172, 65140, 73172, 65204, 34980, 73172, 65236, 34996, -108	downstream, downstream, in gene, downstream, downstream, in gene, downstream, downstream, downstream, in gene, upstream, downstream, downstream, in gene, downstream, downstream, downstream, downstream, in gene, downstream, downstream, in gene, upstream	1	1	1	1	1	1	1	1	27.25	25	19	46.25	30.25	42.5	18	160.5	4	LRMM_4	274	Gene RNF43	URCC, DKFZp781H02126, RNF43, MGC125630, DKFZp781H0392, FLJ99338, FLJ77466, FLJ20315, RNF124	ring finger protein 43	NM_017763.4, XM_011524954.1, XM_011524955.1, XM_011524956.1		NP_060233.3
GeneID:10952	SEC61B	9	99222288	99230619	8331	+	16	NDMM_1::16405, NDMM_1::16406, NDMM_2::15334, NDMM_2::15335, NDMM_3::11744, LRMM_1::19622, LRMM_1::19623, LRMM_1::19624, LRMM_2::18651, LRMM_2::18652, LRMM_3::12246, LRMM_3::12247, NDMM_4::19845, NDMM_4::19846, LRMM_4::18384, LRMM_4::18385	-144, 13808, -112, 13808, -144, -144, 12784, 13744, -112, 13808, -112, 13808, -112, 13808, -144, 13872	upstream, downstream, upstream, downstream, upstream, upstream, downstream, downstream, upstream, downstream, upstream, downstream, upstream, downstream, upstream, downstream	1	1	1	1	1	1	1	1	95.333	67	57	162.667	245.333	102.667	77	160	3	LRMM_1	484	Gene SEC61B	SEC61B	Sec61 translocon beta subunit	NM_006808.2		NP_006799.1
GeneID:6988	TCTA	3	49412206	49416476	4270	+	10	NDMM_1::10712, NDMM_2::10117, NDMM_2::10118, NDMM_3::7775, LRMM_1::12873, LRMM_2::12082, LRMM_3::8206, LRMM_3::8207, NDMM_4::13090, LRMM_4::12488	34, -622, 210, 18, 18, 18, -462, 18, 18, 18	in gene, upstream, in gene, in gene, in gene, in gene, upstream, in gene, in gene, in gene	1	1	1	1	1	1	1	1	85	75	54	160	237	75	73	160	1	LRMM_1	237	Gene TCTA	TCTA	T-cell leukemia translocation altered	NM_022171.2		NP_071503.1
GeneID:148789	B3GALNT2	1	235440660	235504481	63821	-	8	NDMM_1::1502, NDMM_2::1539, NDMM_3::1182, LRMM_1::2032, LRMM_2::1903, LRMM_3::1367, NDMM_4::1766, LRMM_4::1975	-95, -383, -223, -95, -95, -239, -95, -95	upstream, upstream, upstream, upstream, upstream, upstream, upstream, upstream	1	1	1	1	1	1	1	1	57	62	55	144	269	107	51	160	1	LRMM_1	269	Gene B3GALNT2	B3GALNT2, MGC39558, B3GalNAc-T2, MDDGA11	beta-1,3-N-acetylgalactosaminyltransferase 2	NM_001277155.2, NM_152490.4, XM_006711749.2, XM_011544096.1, XM_005273071.3, XM_011544097.1		NP_001264084.1, NP_689703.1
GeneID:84449	ZNF333	19	14689787	14733746	43959	+	8	NDMM_1::7611, NDMM_2::7030, NDMM_3::5558, LRMM_1::8896, LRMM_2::8524, LRMM_3::5749, NDMM_4::8999, LRMM_4::8866	165, 181, 197, 165, 197, 197, 197, 197	in gene, in gene, in gene, in gene, in gene, in gene, in gene, in gene	1	1	1	1	1	1	1	1	96	73	35	158	174	72	44	160	1	LRMM_1	174	Gene ZNF333	ZNF333, KIAA1806	zinc finger protein 333	NM_032433.2, XM_006722924.1, NM_001300912.1, XM_011528362.1, XM_011528363.1, XM_011528364.1, XM_005260098.2, XM_011528365.1, XM_011528366.1, XM_011528367.1, XM_011528368.1, XM_011528369.1, XM_011528370.1, XM_011528371.1, XM_011528372.1		NP_115809.1, XP_006722987.1, NP_001287841.1
GeneID:101928704	LOC101928704	11	43556696	43674197	117501	+	14	NDMM_1::2489, NDMM_1::2490, NDMM_2::2515, NDMM_2::2516, NDMM_3::1977, LRMM_1::3143, LRMM_1::3144, LRMM_2::3068, LRMM_2::3069, LRMM_3::2053, NDMM_4::2973, NDMM_4::2974, LRMM_4::3022, LRMM_4::3023	87592, 124168, 87560, 124168, 124168, 87560, 124168, 87560, 124200, 124088, 87560, 124008, 87496, 124168	in gene, downstream, in gene, downstream, downstream, in gene, downstream, in gene, downstream, downstream, in gene, downstream, in gene, downstream	1	1	1	1	1	1	1	1	73	64	38	101	188.5	57	38	160	2	LRMM_1	310	Gene LOC101928704		uncharacterized LOC101928704	XR_960362.1, XR_960363.1, XR_931224.1, XR_931225.1
GeneID:105372609	LOC105372609	20	37686042	37691276	5234	-	8	NDMM_1::9655, NDMM_2::9051, NDMM_3::7031, LRMM_1::11453, LRMM_2::10846, LRMM_3::7368, NDMM_4::11681, LRMM_4::11290	-2804, -2772, -2740, -2772, -2772, -2772, -2740, -2772	upstream, upstream, upstream, upstream, upstream, upstream, upstream, upstream	1	1	1	1	1	1	1	1	51	63	47	139	212	81	36	160	1	LRMM_1	212	Gene LOC105372609		uncharacterized LOC105372609	XR_920064.1, XR_920065.1, XR_936703.1, XR_936704.1
GeneID:693223	MIR638	19	10718404	10718503	99	+	9	NDMM_1::7514, NDMM_1::7515, NDMM_2::6951, NDMM_3::5513, LRMM_1::8764, LRMM_2::8453, LRMM_3::5702, NDMM_4::8865, LRMM_4::8761	-500, 92, -484, -500, -484, -292, -484, -484, -484	upstream, in gene, upstream, upstream, upstream, upstream, upstream, upstream, upstream	1	1	1	1	1	1	1	1	62	36	22	130	151	30	28	160	1	LRMM_4	160	Gene MIR638	MIR638, MIRN638, hsa-mir-638	microRNA 638
GeneID:56259	CTNNBL1	20	37693955	37872129	178174	+	10	NDMM_1::9655, NDMM_2::9051, NDMM_3::7031, LRMM_1::11453, LRMM_1::11454, LRMM_2::10846, LRMM_2::10847, LRMM_3::7368, NDMM_4::11681, LRMM_4::11290	125, 93, 61, 93, 111133, 93, 111069, 93, 61, 93	in gene, in gene, in gene, in gene, in gene, in gene, in gene, in gene, in gene, in gene	1	1	1	1	1	1	1	1	29	35.5	25.5	71.5	123.5	52.5	20	160	2	LRMM_1	212	Gene CTNNBL1	NYD-SP19, CTNNBL1, P14L, dJ633O20.1, C20orf33, FLJ21108, PP8304, NAP	catenin beta like 1	NM_030877.4, NM_001281495.1, XM_011528917.1		NP_110517.2, NP_001268424.1
GeneID:80256	FAM214B	9	35104121	35116351	12230	-	34	NDMM_1::16182, NDMM_1::16183, NDMM_1::16184, NDMM_1::16185, NDMM_1::16186, NDMM_2::15116, NDMM_2::15117, NDMM_2::15118, NDMM_2::15119, NDMM_3::11589, NDMM_3::11590, NDMM_3::11591, NDMM_3::11592, LRMM_1::19295, LRMM_1::19296, LRMM_1::19297, LRMM_1::19298, LRMM_2::18409, LRMM_2::18410, LRMM_2::18411, LRMM_3::12081, LRMM_3::12082, LRMM_3::12083, LRMM_3::12084, LRMM_3::12085, NDMM_4::19558, NDMM_4::1…	19903, 13055, 4639, -97, -561, 19935, 12959, 415, -97, 19871, 13599, 13023, -161, 19903, 12959, 4671, -97, 19823, 12959, 127, 19882, 12959, 4671, 415, -97, 19903, 12959, 4607, 79, 19903, 13055, 4607, -65, -609	downstream, downstream, in gene, upstream, upstream, downstream, downstream, in gene, upstream, downstream, downstream, downstream, upstream, downstream, downstream, in gene, upstream, downstream, downstream, in gene, downstream, downstream, in gene, in gene, upstream, downstream, downstream, in gene, in gene, downstream, downstream, in gene, upstream, upstream	1	1	1	1	1	1	1	1	48	41.75	25.25	63.25	100	27.75	32	159.25	4	LRMM_4	183	Gene FAM214B	KIAA1539, P1.11659_5, RP11-182N22.6, FLJ11560, bA182N22.6, FAM214B	family with sequence similarity 214 member B	NM_025182.2, XM_005251588.1, XM_005251589.1, XM_005251590.1, XM_005251591.1, XM_005251592.1, XM_005251593.1, XM_005251594.1, XM_011518037.1, XM_011518038.1, XM_011518039.1, XM_011518040.1, XM_005251597.3, XM_005251596.3, XM_005251598.3, XM_011518041.1, XM		NP_079458.2, XP_005251645.1, XP_005251646.1, XP_005251647.1, XP_005251648.1, XP_005251649.1, XP_005251650.1, XP_005251651.1
GeneID:7353	UFD1L	22	19449941	19479296	29355	-	20	NDMM_1::10081, NDMM_1::10082, NDMM_2::9488, NDMM_2::9489, NDMM_2::9490, NDMM_3::7313, NDMM_3::7314, LRMM_1::12079, LRMM_1::12080, LRMM_2::11328, LRMM_2::11329, LRMM_2::11330, LRMM_3::7710, LRMM_3::7711, LRMM_3::7712, LRMM_3::7713, NDMM_4::12259, NDMM_4::12260, LRMM_4::11744, LRMM_4::11745	31765, -256, 31824, 30992, -288, 31648, -288, 31360, -288, 31840, 31264, -288, 32064, 31840, 31344, -288, 31712, -288, 31296, -288	downstream, upstream, downstream, downstream, upstream, downstream, upstream, downstream, upstream, downstream, downstream, upstream, downstream, downstream, downstream, upstream, downstream, upstream, downstream, upstream	1	1	1	1	1	1	1	1	84	87.5	71.5	171	140.5	92	75	159	2	LRMM_4	282	Gene UFD1L	UFD1, UFD1L	ubiquitin fusion degradation 1 like (yeast)	NM_005659.6, NM_001035247.2, XM_011530361.1, XM_011530362.1, XM_005261277.2, XM_006724319.2, XM_011530363.1		NP_005650.2, NP_001030324.2
GeneID:5884	RAD17	5	69369297	69414801	45504	+	22	NDMM_1::12562, NDMM_1::12563, NDMM_1::12564, NDMM_2::11943, NDMM_2::11944, NDMM_3::9074, NDMM_3::9075, NDMM_3::9076, LRMM_1::14888, LRMM_1::14889, LRMM_1::14890, LRMM_2::14499, LRMM_2::14500, LRMM_3::9550, LRMM_3::9551, LRMM_3::9552, NDMM_4::15227, NDMM_4::15228, NDMM_4::15229, LRMM_4::14364, LRMM_4::14365, LRMM_4::14366	399, 5935, 45903, 399, 5775, 399, 5775, 45871, 399, 5775, 45839, 399, 5882, 399, 5775, 45935, 399, 5679, 45839, 399, 5775, 45903	in gene, in gene, downstream, in gene, in gene, in gene, in gene, downstream, in gene, in gene, downstream, in gene, in gene, in gene, in gene, downstream, in gene, in gene, downstream, in gene, in gene, downstream	1	1	1	1	1	1	1	1	89.667	72.333	58.667	101	127.333	78	71.333	159	3	LRMM_4	359	Gene RAD17	RAD24, RAD17, FLJ41520, RAD17SP, R24L, CCYC, HRAD17	RAD17 checkpoint clamp loader component	NM_002873.1, NM_133343.1, NM_001278622.1, NM_133338.2, NM_133340.2, NM_133344.2, NM_133342.2, NM_133341.2, NM_133339.2, XM_011546954.1, XM_011546955.1, XM_005276774.3		NP_002864.1, NP_579921.1, NP_001265551.1, NP_579916.1, NP_579918.1, NP_579917.1, NP_579919.1, NP_579920.1, NP_579922.1
GeneID:126074	SWSAP1	19	11374707	11376951	2244	+	17	NDMM_1::7532, NDMM_1::7533, NDMM_2::6964, NDMM_2::6965, NDMM_2::6966, NDMM_3::5520, NDMM_3::5521, LRMM_1::8784, LRMM_1::8785, LRMM_2::8467, LRMM_2::8468, LRMM_3::5707, LRMM_3::5708, NDMM_4::8888, NDMM_4::8889, LRMM_4::8779, LRMM_4::8780	109, 6285, 77, 6445, 7165, 109, 6861, 45, 6445, 141, 7117, 109, 6797, 109, 6445, 109, 6445	in gene, downstream, in gene, downstream, downstream, in gene, downstream, in gene, downstream, in gene, downstream, in gene, downstream, in gene, downstream, in gene, downstream	1	1	1	1	1	1	1	1	70.5	61.5	42	178.5	220	52.5	58	159	2	LRMM_1	279	Gene SWSAP1	MGC149562, FLJ35119, MGC78620, C19orf39, SWSAP1, ZSWIM7AP1, SWS1AP1	SWIM-type zinc finger 7 associated protein 1	NM_175871.3		NP_787067.2
GeneID:2057	EPOR	19	11377205	11384342	7137	-	17	NDMM_1::7532, NDMM_1::7533, NDMM_2::6964, NDMM_2::6965, NDMM_2::6966, NDMM_3::5520, NDMM_3::5521, LRMM_1::8784, LRMM_1::8785, LRMM_2::8467, LRMM_2::8468, LRMM_3::5707, LRMM_3::5708, NDMM_4::8888, NDMM_4::8889, LRMM_4::8779, LRMM_4::8780	9526, 3350, 9558, 3190, 2470, 9526, 2774, 9590, 3190, 9494, 2518, 9526, 2838, 9526, 3190, 9526, 3190	downstream, in gene, downstream, in gene, in gene, downstream, in gene, downstream, in gene, downstream, in gene, downstream, in gene, downstream, in gene, downstream, in gene	1	1	1	1	1	1	1	1	70.5	61.5	42	178.5	220	52.5	58	159	2	LRMM_1	279	Gene EPOR	MGC138358, EPOR	erythropoietin receptor	NM_000121.3, NR_033663.1		NP_000112.1
GeneID:3276	PRMT1	19	49677152	49688450	11298	+	8	NDMM_1::8033, NDMM_2::7404, NDMM_3::5794, LRMM_1::9362, LRMM_2::8923, LRMM_3::6037, NDMM_4::9543, LRMM_4::9415	-336, -512, -256, -512, -544, -288, -320, -352	upstream, upstream, upstream, upstream, upstream, upstream, upstream, upstream	1	1	1	1	1	1	1	1	92	64	31	118	125	81	37	159	1	LRMM_4	159	Gene PRMT1	IR1B4, HCP1, PRMT1, ANM1, HRMT1L2	protein arginine methyltransferase 1	NM_001207042.2, NM_001536.5, NM_198318.4, NR_033397.4, XM_005258842.1, XM_011526892.1, XM_005258844.3		NP_001193971.1, NP_001527.3, NP_938074.2, XP_005258899.1
GeneID:100847074	MIR5088	19	49682117	49682195	78	+	8	NDMM_1::8033, NDMM_2::7404, NDMM_3::5794, LRMM_1::9362, LRMM_2::8923, LRMM_3::6037, NDMM_4::9543, LRMM_4::9415	-5301, -5477, -5221, -5477, -5509, -5253, -5285, -5317	upstream, upstream, upstream, upstream, upstream, upstream, upstream, upstream	1	1	1	1	1	1	1	1	92	64	31	118	125	81	37	159	1	LRMM_4	159	Gene MIR5088	MIR5088, mir-5088	microRNA 5088
GeneID:51510	CHMP5	9	33264879	33282069	17190	+	19	NDMM_1::16157, NDMM_1::16158, NDMM_1::16159, NDMM_2::15095, NDMM_2::15096, NDMM_3::11570, NDMM_3::11571, NDMM_3::11572, LRMM_1::19254, LRMM_1::19255, LRMM_1::19256, LRMM_1::19257, LRMM_2::18392, LRMM_3::12061, LRMM_3::12062, NDMM_4::19528, NDMM_4::19529, LRMM_4::18072, LRMM_4::18073	-815, 17, 25649, 81, 25649, -303, 49, 25809, -1231, -943, -207, 25649, 26033, -15, 25649, -47, 25681, -15, 25649	upstream, in gene, downstream, in gene, downstream, upstream, in gene, downstream, upstream, upstream, upstream, downstream, downstream, upstream, downstream, upstream, downstream, upstream, downstream	1	1	1	1	1	1	1	1	65	47.667	31	55.333	156.667	23.667	36	158.667	3	LRMM_1	321	Gene CHMP5	PNAS-2, HSPC177, SNF7DC2, CGI-34, CHMP5, Vps60, C9orf83		NM_016410.5, NM_001195536.1		NP_057494.3, NP_001182465.1
GeneID:55293	UEVLD	11	18529609	18588938	59329	-	9	NDMM_1::2392, NDMM_2::2429, NDMM_3::1918, LRMM_1::3038, LRMM_2::2974, LRMM_3::2000, NDMM_4::2863, LRMM_4::2935, LRMM_4::2936	62122, 62122, 62122, 62122, 61962, 62122, 62122, 62122, 202	downstream, downstream, downstream, downstream, downstream, downstream, downstream, downstream, in gene	1	1	1	1	1	1	1	1	77.5	50.5	49	92.5	97.5	52.5	36.5	158.5	2	LRMM_4	286	Gene UEVLD	UEV3, UEVLD, ATTP, FLJ11068	UEV and lactate/malate dehyrogenase domains	NM_001040697.2, NM_001261382.1, NM_001261383.1, NM_001261384.1, NM_001261385.1, NM_001261386.1, NM_018314.4, XM_006718255.1, NM_001297771.1, XM_011520198.1, XM_011520199.1, XM_011520200.1, XM_011520201.1		NP_001035787.1, NP_001248311.1, NP_001248312.1, NP_001248313.1, NP_001248314.1, NP_060784.3, NP_001248315.1, XP_006718318.1, NP_001284700.1
GeneID:140460	ASB7	15	100602550	100651701	49151	+	13	NDMM_1::5839, NDMM_1::5840, NDMM_1::5841, NDMM_2::5228, NDMM_2::5229, NDMM_3::4208, LRMM_1::6504, LRMM_1::6505, LRMM_2::6316, LRMM_3::4311, NDMM_4::6584, LRMM_4::6545, LRMM_4::6546	-5782, -246, 25418, -5494, -182, -182, -5654, -182, -118, -118, -182, -5654, -182	upstream, upstream, in gene, upstream, upstream, upstream, upstream, upstream, upstream, upstream, upstream, upstream, upstream	1	1	1	1	1	1	1	1	80.333	47.667	29.333	107.667	156	36.667	45	158.333	3	LRMM_4	416	Gene ASB7	FLJ25192, ASB7, FLJ22551	ankyrin repeat and SOCS box containing 7	NM_024708.3, NM_198243.2		NP_078984.2, NP_937886.1
GeneID:100129917	LOC100129917	4	780149	781848	1699	-	8	NDMM_1::11619, NDMM_2::10938, NDMM_3::8371, LRMM_1::13837, LRMM_2::12984, LRMM_3::8813, NDMM_4::13972, LRMM_4::13318	136, 184, 88, 216, 88, 88, 88, 24	in gene, in gene, in gene, in gene, in gene, in gene, in gene, in gene	1	1	1	1	1	1	1	1	68	62	42	98	118	78	77	158	1	LRMM_4	158	Gene LOC100129917		uncharacterized LOC100129917	NR_036511.1, NR_036512.1
GeneID:10815	CPLX1	4	784957	826157	41200	-	8	NDMM_1::11619, NDMM_2::10938, NDMM_3::8371, LRMM_1::13837, LRMM_2::12984, LRMM_3::8813, NDMM_4::13972, LRMM_4::13318	44445, 44493, 44397, 44525, 44397, 44397, 44397, 44333	downstream, downstream, downstream, downstream, downstream, downstream, downstream, downstream	1	1	1	1	1	1	1	1	68	62	42	98	118	78	77	158	1	LRMM_4	158	Gene CPLX1	CPX1, CPLX1, CPX-I	complexin 1	NM_006651.3, XM_011513391.1		NP_006642.1
GeneID:105374339	LOC105374339	4	787341	796440	9099	+	8	NDMM_1::11619, NDMM_2::10938, NDMM_3::8371, LRMM_1::13837, LRMM_2::12984, LRMM_3::8813, NDMM_4::13972, LRMM_4::13318	-5629, -5677, -5581, -5709, -5581, -5581, -5581, -5517	upstream, upstream, upstream, upstream, upstream, upstream, upstream, upstream	1	1	1	1	1	1	1	1	68	62	42	98	118	78	77	158	1	LRMM_4	158	Gene LOC105374339		uncharacterized LOC105374339	XR_943524.1, XR_943525.1, XR_925031.1, XR_925032.1
GeneID:64005	MYO1G	7	44962661	44979105	16444	-	8	NDMM_1::14691, NDMM_2::13710, NDMM_3::10508, LRMM_1::17169, LRMM_2::16811, LRMM_3::11031, NDMM_4::17654, LRMM_4::16515	-7679, -7647, -7487, -7679, -7487, -7487, -7679, -7679	upstream, upstream, upstream, upstream, upstream, upstream, upstream, upstream	1	1	1	1	1	1	1	1	114	78	64	131	256	83	66	158	1	LRMM_1	256	Gene MYO1G	MHAG, MYO1G, MGC142104, HA2, HLA-HA2	myosin IG	NM_033054.2, XR_926942.1, XR_926943.1		NP_149043.2
GeneID:101928927	LOC101928927	7	44965092	44985875	20783	+	8	NDMM_1::14691, NDMM_2::13710, NDMM_3::10508, LRMM_1::17169, LRMM_2::16811, LRMM_3::11031, NDMM_4::17654, LRMM_4::16515	21692, 21660, 21500, 21692, 21500, 21500, 21692, 21692	downstream, downstream, downstream, downstream, downstream, downstream, downstream, downstream	1	1	1	1	1	1	1	1	114	78	64	131	256	83	66	158	1	LRMM_1	256	Gene LOC101928927		uncharacterized LOC101928927	XR_252211.1, XR_242171.2
GeneID:677798	SNORA9	7	44985378	44985510	132	-	8	NDMM_1::14691, NDMM_2::13710, NDMM_3::10508, LRMM_1::17169, LRMM_2::16811, LRMM_3::11031, NDMM_4::17654, LRMM_4::16515	-1274, -1242, -1082, -1274, -1082, -1082, -1274, -1274	upstream, upstream, upstream, upstream, upstream, upstream, upstream, upstream	1	1	1	1	1	1	1	1	114	78	64	131	256	83	66	158	1	LRMM_1	256	Gene SNORA9	SNORA9, ACA9, SNORA9A	small nucleolar RNA, H/ACA box 9	NR_002952.1
GeneID:692086	SNORD17	20	17962710	17962946	236	-	8	NDMM_1::9511, NDMM_2::8902, NDMM_3::6926, LRMM_1::11249, LRMM_2::10667, LRMM_3::7230, NDMM_4::11489, LRMM_4::11131	-5886, -5918, -5886, -5886, -5886, -5838, -5886, -5886	upstream, upstream, upstream, upstream, upstream, upstream, upstream, upstream	1	1	1	1	1	1	1	1	63	54	48	141	229	73	58	158	1	LRMM_1	229	Gene SNORD17	SNORD17, HBI-43	small nucleolar RNA, C/D box 17	NR_003045.1
GeneID:92667	MGME1	20	17968853	17991122	22269	+	8	NDMM_1::9511, NDMM_2::8902, NDMM_3::6926, LRMM_1::11249, LRMM_2::10667, LRMM_3::7230, NDMM_4::11489, LRMM_4::11131	-21, 11, -21, -21, -21, -69, -21, -21	upstream, in gene, upstream, upstream, upstream, upstream, upstream, upstream	1	1	1	1	1	1	1	1	63	54	48	141	229	73	58	158	1	LRMM_1	229	Gene MGME1	C20orf72, MGME1, MTDPS11, bA504H3.4, FLJ14597, DDK1	mitochondrial genome maintenance exonuclease 1	NM_052865.2, XM_005260866.1, XM_005260867.2, XM_011529394.1, XM_011529395.1, XM_006723663.2, XM_005260870.2		NP_443097.1, XP_005260923.1, XP_005260924.1
GeneID:100507331	ZSWIM8-AS1	10	73796514	73801399	4885	-	4	NDMM_1::1913, NDMM_3::1541, LRMM_1::2455, LRMM_2::2426	-10313, -9737, -10441, -10313	upstream, upstream, upstream, upstream	1	0	1	0	1	1	0	0	57	74	31	97	111	71	54	158	1	LRMM_4	158	Gene ZSWIM8-AS1	ZSWIM8-AS1	ZSWIM8 antisense RNA 1	NR_038357.1
GeneID:8509	NDST2	10	73801911	73811831	9920	-	9	NDMM_1::1913, NDMM_2::1945, NDMM_3::1541, NDMM_3::1542, LRMM_1::2455, LRMM_2::2426, LRMM_3::1633, NDMM_4::2268, LRMM_4::2392	119, 119, 695, 119, -9, 119, 119, 55, 55	in gene, in gene, in gene, in gene, upstream, in gene, in gene, in gene, in gene	1	1	1	1	1	1	1	1	57	74	31	97	111	71	54	158	1	LRMM_4	158	Gene NDST2	NST2, HSST2, NDST2, MGC129705, MGC129697		NM_003635.3, XM_006718046.1, XM_011540310.1, XM_005270255.2, XM_005270256.3, XR_945852.1		NP_003626.1, XP_006718109.1
GeneID:84787	SUV420H2	19	55339210	55348121	8911	+	9	NDMM_1::8092, NDMM_2::7461, NDMM_3::5825, NDMM_3::5826, LRMM_1::9420, LRMM_2::8977, LRMM_3::6077, NDMM_4::9630, LRMM_4::9462	246, 214, -170, 502, 182, 438, 374, 246, 246	in gene, in gene, upstream, in gene, in gene, in gene, in gene, in gene, in gene	1	1	1	1	1	1	1	1	83	58	32	137	134	56	48	158	1	LRMM_4	158	Gene SUV420H2	KMT5C, FLJ98627, SUV420H2, FLJ51466, MGC2705	lysine methyltransferase 5C	NM_032701.3, XM_011527415.1, XM_005259338.2, XM_006723442.2, XM_011527416.1		NP_116090.2
GeneID:125965	COX6B2	19	55349702	55354814	5112	-	8	NDMM_1::8092, NDMM_2::7461, NDMM_3::5826, LRMM_1::9420, LRMM_2::8977, LRMM_3::6077, NDMM_4::9630, LRMM_4::9462	15358, 15390, 15102, 15422, 15166, 15230, 15358, 15358	downstream, downstream, downstream, downstream, downstream, downstream, downstream, downstream	1	1	1	1	1	1	1	1	83	58	32	137	134	56	48	158	1	LRMM_4	158	Gene COX6B2	MGC119094, CT59, COX6B2, COXVIB2, FLJ46422		NM_144613.4		NP_653214.2
GeneID:91966	CXorf40A	X	149540715	149555340	14625	+	11	NDMM_1::17068, NDMM_2::16000, NDMM_3::12198, NDMM_3::12199, LRMM_1::20501, LRMM_2::19450, LRMM_3::12710, NDMM_4::20781, NDMM_4::20782, LRMM_4::19283, LRMM_4::19284	213, 117, 69, 741, 181, 181, 277, -1131, 85, -1067, 181	in gene, in gene, in gene, in gene, in gene, in gene, in gene, upstream, in gene, upstream, in gene	1	1	1	1	1	1	1	1	33.5	35	18.5	50.5	80.5	28.5	27.5	158	2	LRMM_4	248	Gene CXorf40A	CXorf40A, FLJ52212, EOLA1, CXorf40	chromosome X open reading frame 40A	XM_005278212.1, NM_178124.5, NM_001171908.2, NM_001171907.2, NM_001171909.2, XM_011531212.1, XM_005262348.3, XM_005262349.3, XM_005262350.3		XP_005278269.1, NP_835225.2, NP_001165379.1, NP_001165378.1, NP_001165380.1
GeneID:101928917	LOC101928917	X	149547679	149549870	2191	-	11	NDMM_1::17068, NDMM_2::16000, NDMM_3::12198, NDMM_3::12199, LRMM_1::20501, LRMM_2::19450, LRMM_3::12710, NDMM_4::20781, NDMM_4::20782, LRMM_4::19283, LRMM_4::19284	8942, 9038, 9086, 8414, 8974, 8974, 8878, 10286, 9070, 10222, 8974	downstream, downstream, downstream, downstream, downstream, downstream, downstream, downstream, downstream, downstream, downstream	1	1	1	1	1	1	1	1	33.5	35	18.5	50.5	80.5	28.5	27.5	158	2	LRMM_4	248	Gene LOC101928917		heat shock transcription factor, X-linked-like	XM_005276720.3, XM_005262351.3
GeneID:105371878	LOC105371878	17	69331844	69343487	11643	+	9	NDMM_1::6912, NDMM_1::6913, NDMM_2::6373, NDMM_3::5126, LRMM_1::7977, LRMM_2::7759, LRMM_3::5243, NDMM_4::8083, LRMM_4::8018	-5284, -4484, -4484, -4788, -4484, -4820, -4468, -4468, -4772	upstream, upstream, upstream, upstream, upstream, upstream, upstream, upstream, upstream	1	1	1	1	1	1	1	1	34	44	22	52	70	20	24	158	1	LRMM_4	158	Gene LOC105371878		uncharacterized LOC105371878	XR_918582.1, XR_934949.1
GeneID:8570	KHSRP	19	6413104	6424811	11707	-	8	NDMM_1::7438, NDMM_2::6892, NDMM_3::5484, LRMM_1::8668, LRMM_2::8387, LRMM_3::5661, NDMM_4::8773, LRMM_4::8682	-325, -325, -309, -309, -309, -309, -309, -405	upstream, upstream, upstream, upstream, upstream, upstream, upstream, upstream	1	1	1	1	1	1	1	1	50	37	26	136	159	31	23	158	1	LRMM_1	159	Gene KHSRP	MGC99676, FBP2, KHSRP, KSRP, FUBP2	KH-type splicing regulatory protein	NM_003685.2, XM_005259668.3, XM_011528395.1		NP_003676.2
GeneID:100500888	MIR3940	19	6416410	6416511	101	-	8	NDMM_1::7438, NDMM_2::6892, NDMM_3::5484, LRMM_1::8668, LRMM_2::8387, LRMM_3::5661, NDMM_4::8773, LRMM_4::8682	-8625, -8625, -8609, -8609, -8609, -8609, -8609, -8705	upstream, upstream, upstream, upstream, upstream, upstream, upstream, upstream	1	1	1	1	1	1	1	1	50	37	26	136	159	31	23	158	1	LRMM_1	159	Gene MIR3940	MIR3940, mir-3940	microRNA 3940
GeneID:284427	SLC25A41	19	6426037	6436267	10230	-	8	NDMM_1::7438, NDMM_2::6892, NDMM_3::5484, LRMM_1::8668, LRMM_2::8387, LRMM_3::5661, NDMM_4::8773, LRMM_4::8682	11131, 11131, 11147, 11147, 11147, 11147, 11147, 11051	downstream, downstream, downstream, downstream, downstream, downstream, downstream, downstream	1	1	1	1	1	1	1	1	50	37	26	136	159	31	23	158	1	LRMM_1	159	Gene SLC25A41	MGC34725, FLJ40442, SLC25A41, APC4		NM_173637.3, XR_430136.2, XM_011527926.1, XM_011527927.1		NP_775908.2
GeneID:28985	MCTS1	X	120603889	120621159	17270	+	16	NDMM_1::17031, NDMM_1::17032, NDMM_1::17033, NDMM_2::15952, NDMM_2::15953, NDMM_3::12169, LRMM_1::20400, LRMM_1::20401, LRMM_2::19384, LRMM_2::19385, LRMM_3::12679, NDMM_4::20703, NDMM_4::20704, LRMM_4::19151, LRMM_4::19152, LRMM_4::19153	79, 559, 26111, 239, 26095, 26135, 79, 26095, 223, 26095, 26159, 239, 25999, 143, 687, 26159	in gene, in gene, downstream, in gene, downstream, downstream, in gene, downstream, in gene, downstream, downstream, in gene, downstream, in gene, in gene, downstream	1	1	1	1	1	1	1	1	38.5	31	13.5	45.5	99	27	20.5	158	2	LRMM_4	224	Gene MCTS1	MCT1, MCTS1, MCT-1, FLJ39637	malignant T-cell amplified sequence 1	NM_014060.2, NM_001137554.1, XR_938549.1		NP_054779.1, NP_001131026.1
GeneID:2058	EPRS	1	219968600	220046658	78058	-	10	NDMM_1::1388, NDMM_2::1414, NDMM_2::1415, NDMM_3::1093, LRMM_1::1845, LRMM_2::1799, LRMM_3::1270, NDMM_4::1601, LRMM_4::1818, LRMM_4::1819	162, 58194, 50, 162, 66, 66, 226, 66, 58114, 66	in gene, in gene, in gene, in gene, in gene, in gene, in gene, in gene, in gene, in gene	1	1	1	1	1	1	1	1	43	54.5	38	129	151.5	34.5	54	157.5	2	LRMM_1	295	Gene EPRS	PIG32, EARS, QPRS, DKFZp313B047, EPRS, QARS, GLUPRORS, PARS	glutamyl-prolyl-tRNA synthetase	NM_004446.2		NP_004437.2
GeneID:347744	C6orf52	6	10671418	10694797	23379	-	8	NDMM_1::13391, NDMM_2::12667, NDMM_3::9575, LRMM_1::15775, LRMM_2::15443, LRMM_3::10088, NDMM_4::16096, LRMM_4::15280	141, 141, 109, 109, 109, 269, 109, 141	in gene, in gene, in gene, in gene, in gene, in gene, in gene, in gene	1	1	1	1	1	1	1	1	75	111	68	91	161	73	75	157	1	LRMM_1	161	Gene C6orf52	C6orf52	chromosome 6 open reading frame 52	NM_001145020.1, NR_026736.1, NR_026737.1, XM_011514572.1, XM_011514573.1, XM_006715088.2, XM_011514574.1, XM_011514575.1, XM_006715089.2		NP_001138492.1
GeneID:105374923	LOC105374923	6	10684212	10686111	1899	+	8	NDMM_1::13391, NDMM_2::12667, NDMM_3::9575, LRMM_1::15775, LRMM_2::15443, LRMM_3::10088, NDMM_4::16096, LRMM_4::15280	10444, 10444, 10476, 10476, 10476, 10316, 10476, 10444	downstream, downstream, downstream, downstream, downstream, downstream, downstream, downstream	1	1	1	1	1	1	1	1	75	111	68	91	161	73	75	157	1	LRMM_1	161	Gene LOC105374923		uncharacterized LOC105374923	XR_954236.1, XR_926465.1
GeneID:119392	SFR1	10	104122058	104126385	4327	+	13	NDMM_1::2118, NDMM_1::2119, NDMM_2::2156, NDMM_2::2157, NDMM_3::1720, LRMM_1::2680, LRMM_2::2665, LRMM_2::2666, LRMM_3::1796, LRMM_3::1797, NDMM_4::2530, LRMM_4::2637, LRMM_4::2638	-1098, -58, -874, -234, -42, -74, -1226, -42, -1034, -42, -74, -1130, -42	upstream, upstream, upstream, upstream, upstream, upstream, upstream, upstream, upstream, upstream, upstream, upstream, upstream	1	1	1	1	1	1	1	1	72	58	66	120	163	111	68	157	1	LRMM_1	163	Gene SFR1	MEIR5, bA373N18.1, SFR1, MEI5, FLJ41960, C10orf78	SWI5 dependent homologous recombination repair protein 1	NM_145247.4, NM_001002759.1, XM_005269521.2		NP_660290.3, NP_001002759.1
GeneID:56674	TMEM9B	11	8947201	8965011	17810	-	8	NDMM_1::2332, NDMM_2::2371, NDMM_3::1880, LRMM_1::2948, LRMM_2::2911, LRMM_3::1955, NDMM_4::2776, LRMM_4::2867	659, 659, 467, 723, 307, 323, 659, 659	in gene, in gene, in gene, in gene, in gene, in gene, in gene, in gene	1	1	1	1	1	1	1	1	132	119	57	85	139	67	59	157	1	LRMM_4	157	Gene TMEM9B	C11orf15, TMEM9B	TMEM9 domain family member B	NM_001286095.1, NM_001286094.1, NM_020644.2		NP_001273024.1, NP_001273023.1, NP_065695.1
GeneID:493900	TMEM9B-AS1	11	8964675	8976283	11608	+	8	NDMM_1::2332, NDMM_2::2371, NDMM_3::1880, LRMM_1::2948, LRMM_2::2911, LRMM_3::1955, NDMM_4::2776, LRMM_4::2867	-323, -323, -131, -387, 29, 13, -323, -323	upstream, upstream, upstream, upstream, in gene, in gene, upstream, upstream	1	1	1	1	1	1	1	1	132	119	57	85	139	67	59	157	1	LRMM_4	157	Gene TMEM9B-AS1	C11orf18, TMEM9B-AS1	TMEM9B antisense RNA 1	NR_073431.1
GeneID:158427	TSTD2	9	97600080	97633680	33600	-	8	NDMM_1::16395, NDMM_2::15319, NDMM_3::11732, LRMM_1::19600, LRMM_2::18631, LRMM_3::12235, NDMM_4::19819, LRMM_4::18357	704, 432, 400, 592, 176, 635, 176, 176	in gene, in gene, in gene, in gene, in gene, in gene, in gene, in gene	1	1	1	1	1	1	1	1	105	69	45	154	232	78	58	157	1	LRMM_1	232	Gene TSTD2	C9orf97, TSTD2, FLJ36724	thiosulfate sulfurtransferase (rhodanese)-like domain containing 2	NM_139246.4, XR_929723.1, XM_011518312.1		NP_640339.4
GeneID:4686	NCBP1	9	97633423	97673748	40325	+	8	NDMM_1::16395, NDMM_2::15319, NDMM_3::11732, LRMM_1::19600, LRMM_2::18631, LRMM_3::12235, NDMM_4::19819, LRMM_4::18357	-447, -175, -143, -335, 81, -378, 81, 81	upstream, upstream, upstream, upstream, in gene, upstream, in gene, in gene	1	1	1	1	1	1	1	1	105	69	45	154	232	78	58	157	1	LRMM_1	232	Gene NCBP1	NCBP1, CBP80, MGC2087, Sto1, NCBP	nuclear cap binding protein subunit 1	NM_002486.4, XM_011518709.1, XM_011518710.1, XM_011518711.1, XM_011518712.1, XM_011518713.1, XM_011518714.1, XM_011518715.1		NP_002477.1
GeneID:105376171	LOC105376171	9	97633922	97636453	2531	-	8	NDMM_1::16395, NDMM_2::15319, NDMM_3::11732, LRMM_1::19600, LRMM_2::18631, LRMM_3::12235, NDMM_4::19819, LRMM_4::18357	3477, 3205, 3173, 3365, 2949, 3408, 2949, 2949	downstream, downstream, downstream, downstream, downstream, downstream, downstream, downstream	1	1	1	1	1	1	1	1	105	69	45	154	232	78	58	157	1	LRMM_1	232	Gene LOC105376171		uncharacterized LOC105376171	XR_958652.1, XR_930164.1
GeneID:101929747	LOC101929747	5	96934080	96936094	2014	-	12	NDMM_1::12732, NDMM_2::12087, NDMM_2::12088, NDMM_3::9185, LRMM_1::15071, LRMM_2::14708, LRMM_3::9647, LRMM_3::9648, NDMM_4::15397, NDMM_4::15398, LRMM_4::14542, LRMM_4::14543	1150, 1075, 158, 830, 1150, 1118, 1150, 30, 1150, 158, 1150, 30	in gene, in gene, in gene, in gene, in gene, in gene, in gene, in gene, in gene, in gene, in gene, in gene	1	1	1	1	1	1	1	1	89	50	49	150	178	108	57	157	1	LRMM_1	178	Gene LOC101929747		uncharacterized LOC101929747	XM_005276267.3, XM_005272150.3
GeneID:51277	DNAJC27	2	24943636	24972094	28458	-	10	NDMM_1::8251, NDMM_1::8252, NDMM_2::7633, NDMM_3::5930, LRMM_1::9630, LRMM_2::9159, LRMM_3::6200, NDMM_4::9819, LRMM_4::9665, LRMM_4::9666	414, -493, -34, 222, 222, 222, 286, 222, 222, -642	in gene, upstream, upstream, in gene, in gene, in gene, in gene, in gene, in gene, upstream	1	1	1	1	1	1	1	1	74	59	56	125	249	70	54	157	1	LRMM_1	249	Gene DNAJC27	RBJ, RabJS, DKFZp434N211, DNAJC27	DnaJ heat shock protein family (Hsp40) member C27	NM_016544.2, NM_001198559.1, XM_011532902.1, XR_244938.2		NP_057628.1, NP_001185488.1
GeneID:4580	MTX1	1	155208699	155213839	5140	+	8	NDMM_1::987, NDMM_2::976, NDMM_3::769, LRMM_1::1163, LRMM_2::1136, LRMM_3::831, NDMM_4::1017, LRMM_4::1218	293, 293, 357, 293, 229, 293, 229, 293	in gene, in gene, in gene, in gene, in gene, in gene, in gene, in gene	1	1	1	1	1	1	1	1	37	52	32	99	148	102	53	157	1	LRMM_4	157	Gene MTX1	MTX1, MTXN, MTX	metaxin 1	NM_002455.4, NM_198883.3, XM_006711338.2		NP_002446.3, NP_942584.2
GeneID:105376337	LOC105376337	9	121194174	121212539	18365	+	8	NDMM_1::16526, NDMM_2::15430, NDMM_3::11818, LRMM_1::19762, LRMM_2::18790, LRMM_3::12322, NDMM_4::19986, LRMM_4::18507	7778, 7042, 7778, 7666, 7170, 7170, 7810, 7778	in gene, in gene, in gene, in gene, in gene, in gene, in gene, in gene	1	1	1	1	1	1	1	1	64	64	29	143	162	51	49	157	1	LRMM_1	162	Gene LOC105376337		uncharacterized LOC105376337	XM_011549285.1, XM_011519287.1
GeneID:5589	PRKCSH	19	11435257	11450968	15711	+	8	NDMM_1::7534, NDMM_2::6967, NDMM_3::5522, LRMM_1::8786, LRMM_2::8470, LRMM_3::5710, NDMM_4::8891, LRMM_4::8781	199, 103, 103, 103, 103, 55, 103, 103	in gene, in gene, in gene, in gene, in gene, in gene, in gene, in gene	1	1	1	1	1	1	1	1	66	47	37	140	142	40	35	157	1	LRMM_4	157	Gene PRKCSH	GIIB, AGE-R2, PLD1, PRKCSH, VASAP-60, PCLD, G19P1	protein kinase C substrate 80K-H	NM_002743.3, NM_001001329.2, NM_001289102.1, NM_001289103.1, NM_001289104.1, XM_011528130.1, XM_011528131.1, XM_011528132.1		NP_002734.2, NP_001001329.1, NP_001276031.1, NP_001276032.1, NP_001276033.1
GeneID:50808	AK3	9	4709556	4742043	32487	-	17	NDMM_1::16040, NDMM_1::16041, NDMM_2::14998, NDMM_2::14999, NDMM_3::11500, NDMM_3::11501, LRMM_1::19120, LRMM_1::19121, LRMM_2::18283, LRMM_2::18284, LRMM_3::11973, LRMM_3::11974, LRMM_3::11975, NDMM_4::19399, NDMM_4::19400, LRMM_4::17921, LRMM_4::17922	28059, 923, 28027, 987, 28027, 923, 28059, 1115, 28027, 923, 28027, 923, 347, 28059, 955, 28027, 923	in gene, in gene, in gene, in gene, in gene, in gene, in gene, in gene, in gene, in gene, in gene, in gene, in gene, in gene, in gene, in gene, in gene	1	1	1	1	1	1	1	1	70.5	49	33	51.5	114	61	57	156	2	LRMM_4	223	Gene AK3	FIX, AKL3L1, AK3, AK6, AKL3L, AK3L1	adenylate kinase 3	NM_001199852.1, NM_016282.3, NM_001199853.1, NM_001199855.1, NM_001199856.1		NP_001186781.1, NP_057366.2, NP_001186782.1, NP_001186784.1, NP_001186785.1
GeneID:1376	CPT2	1	53196429	53214197	17768	+	16	NDMM_1::488, NDMM_1::489, NDMM_2::491, NDMM_2::492, NDMM_3::349, NDMM_3::350, LRMM_1::605, LRMM_1::606, LRMM_2::537, LRMM_2::538, LRMM_3::399, LRMM_3::400, NDMM_4::487, NDMM_4::488, LRMM_4::597, LRMM_4::598	403, 24051, 403, 24051, 371, 24051, 531, 24051, 563, 24083, 467, 24051, 499, 24083, 435, 24051	in gene, downstream, in gene, downstream, in gene, downstream, in gene, downstream, in gene, downstream, in gene, downstream, in gene, downstream, in gene, downstream	1	1	1	1	1	1	1	1	64	69	32.5	68.5	125	29.5	46	156	2	LRMM_4	265	Gene CPT2	CPTASE, IIAE4, CPT2, CPT1	carnitine palmitoyltransferase 2	NM_000098.2, XM_005270484.1		NP_000089.1, XP_005270541.1
GeneID:55848	PLGRKT	9	5357966	5438456	80490	-	11	NDMM_1::16048, NDMM_2::15007, NDMM_2::15008, NDMM_3::11507, LRMM_1::19127, LRMM_2::18289, LRMM_2::18290, LRMM_3::11982, LRMM_3::11983, NDMM_4::19406, LRMM_4::17930	632, 632, -200, 536, 632, 632, -72, 760, 392, 632, 632	in gene, in gene, upstream, in gene, in gene, in gene, upstream, in gene, in gene, in gene, in gene	1	1	1	1	1	1	1	1	64	46	37	99	137	45	44	156	1	LRMM_4	156	Gene PLGRKT	C9orf46, FLJ14688, FLJ39176, MDS030, Plg-R(KT), PLGRKT, PLG-RKT, AD025	plasminogen receptor, C-terminal lysine transmembrane protein	NM_018465.3, XM_005251510.3, XM_011517960.1, XM_005251512.3		NP_060935.2
GeneID:374819	LRRC37A3	17	64854147	64919480	65333	-	8	NDMM_1::6873, NDMM_2::6340, NDMM_3::5103, LRMM_1::7926, LRMM_2::7719, LRMM_3::5215, NDMM_4::8025, LRMM_4::7942	56, 56, -40, -8, -8, -8, -8, -8	in gene, in gene, upstream, upstream, upstream, upstream, upstream, upstream	1	1	1	1	1	1	1	1	64	46	35	95	153	41	44	156	1	LRMM_4	156	Gene LRRC37A3	LRRC37, MGC57168, FLJ34306, MGC41826, KIAA0563, LRRC37A3, LRRC37A	leucine-rich repeat containing 37 member A3	NM_001303255.1, NM_199340.3, XM_011524769.1, XM_011524770.1, XM_011524771.1, XM_011524772.1, XM_011524773.1, XM_011524774.1, XM_011524775.1, XM_011524776.1, XM_011524777.1, XM_011524778.1		NP_001290184.1, NP_955372.2
GeneID:284184	C17orf89	17	81239311	81241298	1987	+	8	NDMM_1::7022, NDMM_2::6472, NDMM_3::5204, LRMM_1::8132, LRMM_2::7889, LRMM_3::5318, NDMM_4::8217, LRMM_4::8178	-335, -143, -207, -143, -207, -196, -143, -143	upstream, upstream, upstream, upstream, upstream, upstream, upstream, upstream	1	1	1	1	1	1	1	1	28	51	30	105	123	39	24	156	1	LRMM_4	156	Gene C17orf89	C17orf89	chromosome 17 open reading frame 89	NM_001086521.1		NP_001079990.1
GeneID:84270	C9orf89	9	93096129	93113283	17154	+	12	NDMM_1::16357, NDMM_2::15286, NDMM_3::11708, LRMM_1::19543, LRMM_2::18587, LRMM_2::18588, LRMM_3::12212, LRMM_3::12213, NDMM_4::19774, NDMM_4::19775, NDMM_4::19776, LRMM_4::18312	-641, -609, -513, -609, -641, 63, -641, 175, -641, -97, 23839, -641	upstream, upstream, upstream, upstream, upstream, in gene, upstream, in gene, upstream, upstream, downstream, upstream	1	1	1	1	1	1	1	1	76	41.5	34.5	136	128	44.5	29.5	155.5	2	LRMM_4	285	Gene C9orf89	CARD19, MGC110898, BinCARD, C9orf89, MGC11115, bA370F5.1	caspase recruitment domain family member 19	NM_032310.3, XM_005252274.1, XM_011519093.1, XM_005252273.2, XR_929848.1		NP_115686.3, XP_005252331.1
GeneID:100422879	MIR3124	1	248826377	248826443	66	+	9	NDMM_1::1542, NDMM_2::1582, NDMM_3::1215, NDMM_3::1216, LRMM_1::2084, LRMM_2::1964, LRMM_3::1398, NDMM_4::1822, LRMM_4::2024	-297, -233, -281, 343, -233, -265, -233, -233, -265	upstream, upstream, upstream, downstream, upstream, upstream, upstream, upstream, upstream	1	1	1	1	1	1	1	1	83	79	46	189	231	137	66	155	1	LRMM_1	231	Gene MIR3124	MIR3124, mir-3124	microRNA 3124
GeneID:56915	EXOSC5	19	41386370	41397351	10981	-	11	NDMM_1::7870, NDMM_2::7268, NDMM_3::5699, LRMM_1::9190, LRMM_1::9191, LRMM_2::8779, LRMM_3::5923, NDMM_4::9342, NDMM_4::9343, LRMM_4::9192, LRMM_4::9193	-249, -249, -249, 18919, -249, -249, -249, 18812, -249, 18951, -249	upstream, upstream, upstream, downstream, upstream, upstream, upstream, downstream, upstream, downstream, upstream	1	1	1	1	1	1	1	1	79.5	59.5	31	91	145.5	51.5	53	155	2	LRMM_4	290	Gene EXOSC5	MGC12901, RRP46, EXOSC5, RRP41B, Rrp46p, MGC111224, hRrp46p, p12B	exosome component 5	NM_020158.3		NP_064543.3
GeneID:6726	SRP9	1	225777813	225790466	12653	+	8	NDMM_1::1421, NDMM_2::1454, NDMM_3::1122, LRMM_1::1897, LRMM_2::1817, LRMM_3::1302, NDMM_4::1644, LRMM_4::1870	-181, -37, -21, 75, 51, 75, -85, -21	upstream, upstream, upstream, in gene, in gene, in gene, upstream, upstream	1	1	1	1	1	1	1	1	41	46	47	173	178	24	52	155	1	LRMM_1	178	Gene SRP9	ALURBP, MGC110981, SRP9	signal recognition particle 9kDa	NM_001130440.1, NM_003133.5		NP_001123912.1, NP_003124.1
GeneID:6237	RRAS	19	49635295	49640143	4848	-	14	NDMM_1::8030, NDMM_1::8031, NDMM_2::7401, NDMM_2::7402, NDMM_3::5793, LRMM_1::9358, LRMM_1::9359, LRMM_2::8922, LRMM_3::6035, LRMM_3::6036, NDMM_4::9539, NDMM_4::9540, LRMM_4::9411, LRMM_4::9412	-209, -1745, -209, -1585, -289, -209, -1681, -209, -209, -1841, -209, -1809, -209, -1809	upstream, upstream, upstream, upstream, upstream, upstream, upstream, upstream, upstream, upstream, upstream, upstream, upstream, upstream	1	1	1	1	1	1	1	1	68	48.5	29	85.5	104.5	47	36	155	2	LRMM_4	165	Gene RRAS	RRAS	related RAS viral (r-ras) oncogene homolog	NM_006270.3		NP_006261.1
GeneID:50801	KCNK4	11	64291321	64300031	8710	+	20	NDMM_1::2634, NDMM_1::2635, NDMM_2::2648, NDMM_2::2649, NDMM_2::2650, NDMM_3::2074, NDMM_3::2075, NDMM_3::2076, LRMM_1::3307, LRMM_1::3308, LRMM_2::3206, LRMM_2::3207, LRMM_2::3208, LRMM_3::2157, LRMM_3::2158, NDMM_4::3126, NDMM_4::3127, NDMM_4::3128, LRMM_4::3188, LRMM_4::3189	-5753, 13879, -6713, 13255, 13911, -6713, 13255, 13927, -6553, 13607, -6713, 13255, 13927, -6713, 13255, -6697, -5753, 13895, -6649, 13895	upstream, downstream, upstream, downstream, downstream, upstream, downstream, downstream, upstream, downstream, upstream, downstream, downstream, upstream, downstream, upstream, upstream, downstream, upstream, downstream	1	1	1	1	1	1	1	1	84	53.5	27.5	93.5	177.5	65.5	32.5	155	2	LRMM_1	223	Gene KCNK4	KCNK4, TRAAK1, K2p4.1	potassium two pore domain channel subfamily K member 4	NM_033310.2		NP_201567.1
GeneID:3191	HNRNPL	19	38836378	38852339	15961	-	14	NDMM_1::7812, NDMM_1::7813, NDMM_2::7217, NDMM_3::5663, LRMM_1::9134, LRMM_1::9135, LRMM_2::8722, LRMM_2::8723, LRMM_3::5877, LRMM_3::5878, NDMM_4::9282, NDMM_4::9283, LRMM_4::9123, LRMM_4::9124	20579, 1811, 1811, 1811, 20563, 1811, 20403, 1763, 20707, 2195, 20563, 1811, 20531, 1811	downstream, in gene, in gene, in gene, downstream, in gene, downstream, in gene, downstream, in gene, downstream, in gene, downstream, in gene	1	1	1	1	1	1	1	1	60.5	48.5	26	99	117	49.5	32.5	155	2	LRMM_4	262	Gene HNRNPL	HNRNPL, FLJ35509, HNRPL, P/OKcl.14, hnRNP-L	heterogeneous nuclear ribonucleoprotein L	NM_001533.2, NM_001005335.1, XR_243927.1, XM_011526886.1, XM_011526887.1, XM_011526888.1, XM_011526889.1, XM_011526890.1		NP_001524.2, NP_001005335.1
GeneID:9040	UBE2M	19	58555712	58558976	3264	-	10	NDMM_1::8148, NDMM_1::8149, NDMM_2::7520, NDMM_3::5853, LRMM_1::9480, LRMM_2::9015, LRMM_3::6108, NDMM_4::9697, LRMM_4::9524, LRMM_4::9525	3712, 224, 224, 160, 160, -160, 224, 160, 3840, 160	downstream, in gene, in gene, in gene, in gene, upstream, in gene, in gene, downstream, in gene	1	1	1	1	1	1	1	1	77	47.5	30	93.5	138	35	28	155	2	LRMM_4	232	Gene UBE2M	UBC-RS2, UBC12, UBE2M, hUbc12	ubiquitin conjugating enzyme E2 M	NM_003969.3		NP_003960.1
GeneID:56006	SMG9	19	43727992	43754990	26998	-	7	NDMM_1::7914, NDMM_2::7310, NDMM_3::5730, LRMM_1::9234, LRMM_2::8815, NDMM_4::9396, LRMM_4::9249	78, 110, -82, 110, 238, 110, 174	in gene, in gene, upstream, in gene, in gene, in gene, in gene	1	1	1	1	1	1	0	1	33	45	24	84	81	41	27	155	1	LRMM_4	155	Gene SMG9	C19orf61, F17127_1, FLJ12886, DKFZp564H1322, SMG9	SMG9 nonsense mediated mRNA decay factor	NM_019108.2, XM_005259057.2, XM_011527113.1, XM_011527114.1, XM_011527115.1, XM_011527116.1, XM_011527117.1		NP_061981.2
GeneID:105369382	LOC105369382	11	73253426	73259158	5732	+	6	NDMM_1::2804, NDMM_2::2793, LRMM_1::3511, LRMM_2::3377, NDMM_4::3323, LRMM_4::3405	-3954, -3826, -3954, -3954, -3826, -3890	upstream, upstream, upstream, upstream, upstream, upstream	1	1	0	1	1	1	0	1	86	21	9	51	96	39	8	155	1	LRMM_4	155	Gene LOC105369382		uncharacterized LOC105369382	XR_913291.1, XR_950296.1
GeneID:283131	NEAT1	11	65422798	65426532	3734	+	9	NDMM_1::2657, NDMM_2::2668, NDMM_3::2097, LRMM_1::3347, LRMM_2::3239, LRMM_3::2178, NDMM_4::3160, LRMM_4::3226, LRMM_4::3227	-3694, -3694, -3822, -3694, -3854, -3694, -3694, -3566, -1390	upstream, upstream, upstream, upstream, upstream, upstream, upstream, upstream, upstream	1	1	1	1	1	1	1	1	112	79	45.5	174	163	105	79.5	154	2	NDMM_4	280	Gene NEAT1	TncRNA, NCRNA00084, NEAT1, VINC, LINC00084	nuclear paraspeckle assembly transcript 1 (non-protein coding)	NR_028272.1
GeneID:116068	LYSMD3	5	90515626	90529584	13958	-	8	NDMM_1::12686, NDMM_2::12049, NDMM_3::9156, LRMM_1::15016, LRMM_2::14650, LRMM_3::9619, NDMM_4::15351, LRMM_4::14491	80, 80, 144, 64, 80, 80, 80, 80	in gene, in gene, in gene, in gene, in gene, in gene, in gene, in gene	1	1	1	1	1	1	1	1	101	95	73	112	173	107	66	154	1	LRMM_1	173	Gene LYSMD3	FLJ13542, LYSMD3, DKFZp686F0735	LysM domain containing 3	NM_001286812.1, NM_198273.2, XM_005248421.3		NP_001273741.1, NP_938014.1
GeneID:55295	KLHL26	19	18637028	18670492	33464	+	8	NDMM_1::7681, NDMM_2::7099, NDMM_3::5595, LRMM_1::8985, LRMM_2::8609, LRMM_3::5798, NDMM_4::9106, LRMM_4::8971	-356, -356, -532, -324, -516, -441, -356, -308	upstream, upstream, upstream, upstream, upstream, upstream, upstream, upstream	1	1	1	1	1	1	1	1	113	59	35	267	168	119	63	154	1	NDMM_4	267	Gene KLHL26	KLHL26, FLJ11078	kelch like family member 26	NM_018316.1		NP_060786.1
GeneID:23165	NUP205	7	135557914	135648753	90839	+	8	NDMM_1::15221, NDMM_2::14157, NDMM_3::10861, LRMM_1::17855, LRMM_2::17327, LRMM_3::11374, NDMM_4::18218, LRMM_4::16990	-58, -58, -58, -58, -58, -58, -58, -58	upstream, upstream, upstream, upstream, upstream, upstream, upstream, upstream	1	1	1	1	1	1	1	1	100	84	54	100	190	76	49	154	1	LRMM_1	190	Gene NUP205	NUP205, C7orf14	nucleoporin 205kDa	NM_015135.2, XM_005250235.2		NP_055950.1
GeneID:117246	FTSJ3	17	63819433	63827671	8238	-	9	NDMM_1::6852, NDMM_2::6317, NDMM_3::5085, LRMM_1::7899, LRMM_2::7691, LRMM_3::5195, LRMM_3::5196, NDMM_4::7998, LRMM_4::7897	183, 167, 151, 343, 503, 407, 151, 439, 151	in gene, in gene, in gene, in gene, in gene, in gene, in gene, in gene, in gene	1	1	1	1	1	1	1	1	39	31	38	79	153	51	31	154	1	LRMM_4	154	Gene FTSJ3	FLJ20062, SPB1, EPCS3, FTSJ3	FtsJ homolog 3 (E. coli)	NM_017647.3		NP_060117.3
GeneID:808	CALM3	19	46601255	46610782	9527	+	9	NDMM_1::7964, NDMM_2::7352, NDMM_3::5754, LRMM_1::9285, LRMM_2::8856, LRMM_3::5992, LRMM_3::5993, NDMM_4::9453, LRMM_4::9317	-391, -423, -391, -391, -391, -391, 18777, -391, -391	upstream, upstream, upstream, upstream, upstream, upstream, downstream, upstream, upstream	1	1	1	1	1	1	1	1	83.5	62	29.5	109	111	146	44	153.5	2	LRMM_4	300	Gene CALM3	CALM2, CALM1, CALM3, PHKD, HEL-S-72, PHKD3	calmodulin 3 (phosphorylase kinase, delta)	NM_005184.2		NP_005175.2
GeneID:80184	CEP290	12	88049013	88142216	93203	-	8	NDMM_1::3644, NDMM_2::3702, NDMM_3::2830, LRMM_1::4459, LRMM_2::4362, LRMM_3::2949, NDMM_4::4422, LRMM_4::4402	104, 232, 232, 168, 104, 200, 104, 232	in gene, in gene, in gene, in gene, in gene, in gene, in gene, in gene	1	1	1	1	1	1	1	1	71	83	54	127	87	98	62	153	1	LRMM_4	153	Gene CEP290	BBS14, LCA10, FLJ21979, JBTS6, rd16, SLSN6, 3H11Ag, POC3, CEP290, MKS4, JBTS5, CT87, FLJ13615, NPHP6, KIAA0373	centrosomal protein 290kDa	NM_025114.3, XM_011538756.1, XM_011538757.1, XM_011538758.1, XM_011538759.1, XM_011538760.1, XM_011538761.1, XM_011538762.1, XM_011538763.1, XM_011538764.1, XM_011538765.1, XM_011538766.1		NP_079390.3
GeneID:160418	TMTC3	12	88142296	88199887	57591	+	8	NDMM_1::3644, NDMM_2::3702, NDMM_3::2830, LRMM_1::4459, LRMM_2::4362, LRMM_3::2949, NDMM_4::4422, LRMM_4::4402	-184, -312, -312, -248, -184, -280, -184, -312	upstream, upstream, upstream, upstream, upstream, upstream, upstream, upstream	1	1	1	1	1	1	1	1	71	83	54	127	87	98	62	153	1	LRMM_4	153	Gene TMTC3	FLJ90492, SMILE, TMTC3, DKFZp686O22167, DKFZp686M1969, DKFZp686C0968, DKFZp686O2342	transmembrane and tetratricopeptide repeat containing 3	NM_181783.3, XM_011537980.1, XM_005268683.3, XM_011537981.1		NP_861448.2
GeneID:440	ASNS	7	97852117	97872542	20425	-	9	NDMM_1::14931, NDMM_2::13919, NDMM_3::10672, LRMM_1::17484, LRMM_2::17079, LRMM_2::17080, LRMM_3::11201, NDMM_4::17897, LRMM_4::16739	126, 137, 206, 190, 638, 222, 190, 190, 190	in gene, in gene, in gene, in gene, in gene, in gene, in gene, in gene, in gene	1	1	1	1	1	1	1	1	71	61	66	121	176	34	38	153	1	LRMM_1	176	Gene ASNS	ASNS, ASNSD, TS11	asparagine synthetase (glutamine-hydrolyzing)	NM_001178075.1, NM_001178076.1, NM_001178077.1, NM_001673.4, NM_133436.3, NM_183356.3		NP_001171546.1, NP_001171547.1, NP_001171548.1, NP_001664.3, NP_597680.2, NP_899199.2
GeneID:7706	TRIM25	17	56887909	56914048	26139	-	16	NDMM_1::6785, NDMM_1::6786, NDMM_2::6248, NDMM_2::6249, NDMM_3::5040, NDMM_3::5041, LRMM_1::7823, LRMM_1::7824, LRMM_2::7589, LRMM_2::7590, LRMM_3::5136, LRMM_3::5137, NDMM_4::7918, NDMM_4::7919, LRMM_4::7785, LRMM_4::7786	5744, 208, 5760, 96, 5728, 96, 192, -176, 5536, 256, 5536, 64, 5632, 96, 5632, 96	in gene, in gene, in gene, in gene, in gene, in gene, in gene, upstream, in gene, in gene, in gene, in gene, in gene, in gene, in gene, in gene	1	1	1	1	1	1	1	1	35	51	37.5	83.5	41	58	29.5	153	2	LRMM_4	211	Gene TRIM25	RNF147, Z147, TRIM25, EFP, ZNF147	tripartite motif containing 25	NM_005082.4		NP_005073.2
GeneID:375337	TOPAZ1	3	44241886	44336610	94724	+	8	NDMM_1::10651, NDMM_2::10053, NDMM_3::7722, LRMM_1::12778, LRMM_2::11995, LRMM_3::8142, NDMM_4::13001, LRMM_4::12405	96354, 96674, 96674, 96674, 96674, 96610, 96674, 96658	downstream, downstream, downstream, downstream, downstream, downstream, downstream, downstream	1	1	1	1	1	1	1	1	78	111	52	126	215	72	47	152	1	LRMM_1	215	Gene TOPAZ1	C3orf77, FLJ36157, TOPAZ1	testis and ovary specific PAZ domain containing 1	NM_001145030.1, XM_011533694.1		NP_001138502.1
GeneID:105377055	LOC105377055	3	44326553	44338015	11462	-	8	NDMM_1::10651, NDMM_2::10053, NDMM_3::7722, LRMM_1::12778, LRMM_2::11995, LRMM_3::8142, NDMM_4::13001, LRMM_4::12405	-225, -545, -545, -545, -545, -481, -545, -529	upstream, upstream, upstream, upstream, upstream, upstream, upstream, upstream	1	1	1	1	1	1	1	1	78	111	52	126	215	72	47	152	1	LRMM_1	215	Gene LOC105377055		uncharacterized LOC105377055	XR_937194.1, XR_937201.1, XR_940782.1, XR_940783.1
GeneID:285343	TCAIM	3	44338119	44409448	71329	+	8	NDMM_1::10651, NDMM_2::10053, NDMM_3::7722, LRMM_1::12778, LRMM_2::11995, LRMM_3::8142, NDMM_4::13001, LRMM_4::12405	121, 441, 441, 441, 441, 377, 441, 425	in gene, in gene, in gene, in gene, in gene, in gene, in gene, in gene	1	1	1	1	1	1	1	1	78	111	52	126	215	72	47	152	1	LRMM_1	215	Gene TCAIM	FLJ41686, DKFZp313N0621, TCAIM, MGC119532, MGC119531, C3orf23, MGC119533, MGC119530, TOAG1, TOAG-1		NM_001029840.2, NM_001029839.2, NM_173826.3, NM_001282913.1, NM_001282914.1, NM_001282915.1, XM_011533621.1		NP_001025011.1, NP_001025010.1, NP_776187.2, NP_001269842.1, NP_001269843.1, NP_001269844.1
GeneID:5569	PKIA	8	78516101	78605267	89166	+	8	NDMM_1::15692, NDMM_2::14613, NDMM_3::11192, LRMM_1::18476, LRMM_2::17842, LRMM_3::11700, NDMM_4::18824, LRMM_4::17471	123, 59, 91, 123, 347, 59, 27, 91	in gene, in gene, in gene, in gene, in gene, in gene, in gene, in gene	1	1	1	1	1	1	1	1	43	78	31	80	184	69	36	152	1	LRMM_1	184	Gene PKIA	PRKACN1, PKIA	protein kinase (cAMP-dependent, catalytic) inhibitor alpha	NM_006823.3, NM_181839.2		NP_006814.1, NP_862822.1
GeneID:100131691	MZF1-AS1	19	58559186	58574797	15611	+	25	NDMM_1::8148, NDMM_1::8149, NDMM_1::8150, NDMM_1::8151, NDMM_2::7520, NDMM_2::7521, NDMM_2::7522, NDMM_3::5853, NDMM_3::5854, NDMM_3::5855, LRMM_1::9480, LRMM_1::9481, LRMM_1::9482, LRMM_2::9015, LRMM_2::9016, LRMM_2::9017, LRMM_3::6108, LRMM_3::6109, NDMM_4::9697, NDMM_4::9698, NDMM_4::9699, LRMM_4::9524, LRMM_4::9525, LRMM_4::9526, LRMM_4::9527	-3922, -434, 13838, 16590, -434, 13774, 16398, -370, 14030, 16542, -370, 14190, 16398, -50, 14286, 16398, -434, 14350, -370, 14190, 16398, -4050, -370, 13774, 16398	upstream, upstream, in gene, downstream, upstream, in gene, downstream, upstream, in gene, downstream, upstream, in gene, downstream, upstream, in gene, downstream, upstream, in gene, upstream, in gene, downstream, upstream, upstream, in gene, downstream	1	1	1	1	1	1	1	1	81.25	56	33.75	110	137.5	62.25	32.75	151.25	4	LRMM_4	232	Gene MZF1-AS1	AC016629.8, MZF1-AS1	MZF1 antisense RNA 1	NR_027334.2
GeneID:7593	MZF1	19	58561917	58574439	12522	-	25	NDMM_1::8148, NDMM_1::8149, NDMM_1::8150, NDMM_1::8151, NDMM_2::7520, NDMM_2::7521, NDMM_2::7522, NDMM_3::5853, NDMM_3::5854, NDMM_3::5855, LRMM_1::9480, LRMM_1::9481, LRMM_1::9482, LRMM_2::9015, LRMM_2::9016, LRMM_2::9017, LRMM_3::6108, LRMM_3::6109, NDMM_4::9697, NDMM_4::9698, NDMM_4::9699, LRMM_4::9524, LRMM_4::9525, LRMM_4::9526, LRMM_4::9527	19175, 15687, 1415, -1337, 15687, 1479, -1145, 15623, 1223, -1289, 15623, 1063, -1145, 15303, 967, -1145, 15687, 903, 15623, 1063, -1145, 19303, 15623, 1479, -1145	downstream, downstream, in gene, upstream, downstream, in gene, upstream, downstream, in gene, upstream, downstream, in gene, upstream, downstream, in gene, upstream, downstream, in gene, downstream, in gene, upstream, downstream, downstream, in gene, upstream	1	1	1	1	1	1	1	1	81.25	56	33.75	110	137.5	62.25	32.75	151.25	4	LRMM_4	232	Gene MZF1	MZF1, MZF-1, MZF1B, ZFP98, ZNF42, ZSCAN6, Zfp98	myeloid zinc finger 1	NM_198055.1, NM_003422.2, NM_001267033.1, XM_005259204.2, XM_011527264.1, XM_011527265.1, XM_011527266.1, XM_006723359.2		NP_932172.1, NP_003413.2, NP_001253962.1
GeneID:5514	PPP1R10	6	30600400	30618607	18207	-	17	NDMM_1::13567, NDMM_1::13568, NDMM_2::12845, NDMM_2::12846, NDMM_3::9708, NDMM_3::9709, LRMM_1::15927, LRMM_1::15928, LRMM_1::15929, LRMM_2::15622, LRMM_3::10220, NDMM_4::16336, NDMM_4::16337, NDMM_4::16338, NDMM_4::16339, LRMM_4::15478, LRMM_4::15479	943, -8081, 943, -8081, 1007, -8145, 3631, 1007, -8145, 943, 1007, 27695, 3631, 943, -8097, 1007, -8145	in gene, upstream, in gene, upstream, in gene, upstream, in gene, in gene, upstream, in gene, in gene, downstream, in gene, in gene, upstream, in gene, upstream	1	1	1	1	1	1	1	1	84	60.25	53.75	106.5	112.75	74.5	62.5	151	4	LRMM_4	490	Gene PPP1R10	CAT53, PNUTS, R111, PPP1R10, PP1R10, FB19		NM_002714.3, NR_072994.1, XM_006715130.1, XM_006725489.1, XM_006725703.1, XM_006725820.1, XM_006725912.1, XM_006726005.1, XM_006726100.1, XM_011514722.1, XM_011547261.1, XM_011547664.1, XM_011547896.1, XM_011548062.1, XM_011548252.1, XM_011548452.1		NP_002705.2, XP_006715193.1, XP_006725552.1, XP_006725766.1, XP_006725883.1, XP_006725975.1, XP_006726068.1, XP_006726163.1
GeneID:9044	BTAF1	10	91923769	92030998	107229	+	9	NDMM_1::2000, NDMM_1::2001, NDMM_2::2034, NDMM_3::1620, LRMM_1::2548, LRMM_2::2525, LRMM_3::1695, NDMM_4::2384, LRMM_4::2477	39, 50679, 71, 71, 71, 71, 39, 39, 71	in gene, in gene, in gene, in gene, in gene, in gene, in gene, in gene, in gene	1	1	1	1	1	1	1	1	61.5	51.5	36	57	78	86	54	151	2	LRMM_1	153	Gene BTAF1	TAF(II)170, BTAF1, TAFII170, MOT1, TAF172, MGC138406, KIAA0940	B-TFIID TATA-box binding protein associated factor 1	NM_003972.2, XM_005270266.1, XR_246113.1, XM_011540326.1, XM_011540327.1, XM_011540328.1, XM_011540329.1		NP_003963.1, XP_005270323.1
GeneID:3183	HNRNPC	14	21209136	21269479	60343	-	8	NDMM_1::4370, NDMM_2::4306, NDMM_3::3354, LRMM_1::5194, LRMM_2::5039, LRMM_3::3433, NDMM_4::5181, LRMM_4::5168	-89, -89, -89, -89, -89, -89, -89, -89	upstream, upstream, upstream, upstream, upstream, upstream, upstream, upstream	1	1	1	1	1	1	1	1	100	35	35	140	159	57	52	151	1	LRMM_1	159	Gene HNRNPC	C1, MGC104306, MGC117353, HNRNP, HNRPC, HNRNPC, SNRPC, MGC105117, C2, MGC131677	heterogeneous nuclear ribonucleoprotein C (C1/C2)	NM_031314.2, NM_004500.3, NM_001077442.1, NM_001077443.1, XM_011536708.1, XM_011536709.1, XM_011536710.1, XM_011536711.1, XM_006720125.2, XM_011536712.1		NP_112604.2, NP_004491.2, NP_001070910.1, NP_001070911.1
GeneID:54793	KCTD9	8	25427842	25458468	30626	-	8	NDMM_1::15461, NDMM_2::14381, NDMM_3::11005, LRMM_1::18122, LRMM_2::17564, LRMM_3::11535, NDMM_4::18501, LRMM_4::17229	-220, -220, -220, -124, -220, -220, -124, -220	upstream, upstream, upstream, upstream, upstream, upstream, upstream, upstream	1	1	1	1	1	1	1	1	52	30	31	149	147	66	39	151	1	LRMM_4	151	Gene KCTD9	BTBD27, FLJ20038, KCTD9	potassium channel tetramerization domain containing 9	NM_017634.3, XM_005273544.2, XM_005273541.2, XM_005273545.2, XM_005273542.2, XM_011544560.1, XM_005273543.2		NP_060104.2
GeneID:157313	CDCA2	8	25458574	25511308	52734	+	8	NDMM_1::15461, NDMM_2::14381, NDMM_3::11005, LRMM_1::18122, LRMM_2::17564, LRMM_3::11535, NDMM_4::18501, LRMM_4::17229	114, 114, 114, 18, 114, 114, 18, 114	in gene, in gene, in gene, in gene, in gene, in gene, in gene, in gene	1	1	1	1	1	1	1	1	52	30	31	149	147	66	39	151	1	LRMM_4	151	Gene CDCA2	MGC129907, Repo-Man, CDCA2, MGC129906, PPP1R81, FLJ25804	cell division cycle associated 2	NM_152562.2, XM_006716294.1, XM_005273418.2, XM_011544415.1, XR_949377.1, XM_011544416.1, XM_011544417.1, XM_011544418.1, XM_011544419.1, XM_011544420.1		NP_689775.2, XP_006716357.1, XP_005273475.1
GeneID:641649	TMEM91	19	41363966	41384083	20117	+	11	NDMM_1::7869, NDMM_2::7267, NDMM_3::5698, LRMM_1::9189, LRMM_1::9190, LRMM_2::8778, LRMM_3::5922, NDMM_4::9341, NDMM_4::9342, LRMM_4::9191, LRMM_4::9192	66, 2, 66, 66, 14466, 2, 50, 66, 14573, 66, 14434	in gene, in gene, in gene, in gene, in gene, in gene, in gene, in gene, in gene, in gene, in gene	1	1	1	1	1	1	1	1	51	33.5	22.5	112.5	109.5	37	24.5	151	2	LRMM_4	282	Gene TMEM91	IFITMD6, FLJ45695, TMEM91, FLJ27310, DSPC3	transmembrane protein 91	NM_001098824.1, NM_001098822.1, NM_001098825.1, NM_001042595.2, NM_001098823.1, NM_001098821.1		NP_001092294.1, NP_001092292.1, NP_001092295.1, NP_001036060.1, NP_001092293.1, NP_001092291.1
GeneID:56997	ADCK3	1	226940237	226987545	47308	+	9	NDMM_1::1445, NDMM_2::1479, NDMM_3::1146, LRMM_1::1938, LRMM_2::1841, LRMM_2::1842, LRMM_3::1327, NDMM_4::1687, LRMM_4::1908	-269, -381, -397, -141, -45, 55475, -365, -173, -173	upstream, upstream, upstream, upstream, upstream, downstream, upstream, upstream, upstream	1	1	1	1	1	1	1	1	22	24.5	17	152	92.5	20	21	151	2	LRMM_1	184	Gene ADCK3	MGC4849, COQ8, ARCA2, SCAR9, CABC1, ADCK3, COQ10D4	aarF domain containing kinase 3	NM_020247.4, XM_005273201.1, XM_011544238.1, XM_011544239.1, XM_011544240.1, XM_011544241.1		NP_064632.2, XP_005273258.1
GeneID:9696	CROCC	1	16895707	16972979	77272	+	26	NDMM_1::142, NDMM_1::143, NDMM_1::144, NDMM_1::145, NDMM_2::133, NDMM_2::134, NDMM_2::135, NDMM_2::136, NDMM_3::90, NDMM_3::91, LRMM_1::162, LRMM_1::163, LRMM_1::164, LRMM_2::162, LRMM_2::163, LRMM_2::164, LRMM_2::165, LRMM_3::108, LRMM_3::109, NDMM_4::137, NDMM_4::138, NDMM_4::139, LRMM_4::153, LRMM_4::154, LRMM_4::155, LRMM_4::156	389, 821, 9349, 65269, 517, 1093, 9349, 18661, 357, 9317, 517, 9285, 18181, 389, 9349, 18661, 65333, 389, 9349, 805, 9285, 18453, 389, 9349, 18213, 65253	in gene, in gene, in gene, in gene, in gene, in gene, in gene, in gene, in gene, in gene, in gene, in gene, in gene, in gene, in gene, in gene, in gene, in gene, in gene, in gene, in gene, in gene, in gene, in gene, in gene, in gene	1	1	1	1	1	1	1	1	96.25	83	48.5	65	149	85.5	100.25	150.75	4	LRMM_1	453	Gene CROCC	CROCC, ROLT, KIAA0445	ciliary rootlet coiled-coil, rootletin	NM_014675.4, XM_011542468.1, XM_011542469.1, XM_011542470.1, XM_011542471.1, XM_006711058.2, XM_011542472.1		NP_055490.4
GeneID:221443	OARD1	6	41066792	41072449	5657	-	10	NDMM_1::13713, NDMM_2::13000, NDMM_3::9808, NDMM_3::9809, LRMM_1::16089, LRMM_2::15780, LRMM_3::10350, LRMM_3::10351, NDMM_4::16529, LRMM_4::15680	-799, 273, 273, -639, -287, -703, -783, -1215, -383, -255	upstream, in gene, in gene, upstream, upstream, upstream, upstream, upstream, upstream, upstream	1	1	1	1	1	1	1	1	84	70	41	115	152	83	55	150	1	LRMM_1	152	Gene OARD1	C6orf130, dJ34B21.3, MGC19570, TARG1, OARD1, FLJ17636	O-acyl-ADP-ribose deacylase 1	NM_145063.2		NP_659500.1
GeneID:4800	NFYA	6	41072968	41102407	29439	+	10	NDMM_1::13713, NDMM_2::13000, NDMM_3::9808, NDMM_3::9809, LRMM_1::16089, LRMM_2::15780, LRMM_3::10350, LRMM_3::10351, NDMM_4::16529, LRMM_4::15680	280, -792, -792, 120, -232, 184, 264, 696, -136, -264	in gene, upstream, upstream, in gene, upstream, in gene, in gene, in gene, upstream, upstream	1	1	1	1	1	1	1	1	84	70	41	115	152	83	55	150	1	LRMM_1	152	Gene NFYA	CBF-B, HAP2, CBF-A, NF-YA, FLJ11236, NFYA		NM_002505.4, NM_021705.3		NP_002496.1, NP_068351.1
GeneID:145788	C15orf65	15	55408525	55418712	10187	+	8	NDMM_1::5324, NDMM_2::4885, NDMM_3::3979, LRMM_1::6064, LRMM_2::5975, LRMM_3::4050, NDMM_4::6152, LRMM_4::6063	-525, -333, -525, -333, -525, -333, -333, -333	upstream, upstream, upstream, upstream, upstream, upstream, upstream, upstream	1	1	1	1	1	1	1	1	198	58	54	85	157	100	52	150	1	NDMM_1	198	Gene C15orf65	C15orf65, DKFZp686K1763	chromosome 15 open reading frame 65	NM_001198784.1		NP_001185713.1
GeneID:79639	TMEM53	1	44653247	44674608	21361	-	8	NDMM_1::422, NDMM_2::420, NDMM_3::299, LRMM_1::522, LRMM_2::479, LRMM_3::336, NDMM_4::421, LRMM_4::501	304, 304, 176, 272, 304, 304, 272, 240	in gene, in gene, in gene, in gene, in gene, in gene, in gene, in gene	1	1	1	1	1	1	1	1	66	52	39	71	128	112	44	150	1	LRMM_4	150	Gene TMEM53	TMEM53, NET4, FLJ22353	transmembrane protein 53	NM_001300748.1, NM_024587.3, NM_001300746.1, NM_001300747.1, XM_011542138.1		NP_001287677.1, NP_078863.2, NP_001287675.1, NP_001287676.1
GeneID:105369337	LOC105369337	11	63836865	63839417	2552	-	8	NDMM_1::2620, NDMM_2::2635, NDMM_3::2066, LRMM_1::3291, LRMM_2::3193, LRMM_3::2144, NDMM_4::3112, LRMM_4::3171	249, 281, 265, 473, 249, 121, 473, 281	in gene, in gene, in gene, in gene, in gene, in gene, in gene, in gene	1	1	1	1	1	1	1	1	68	48	27	61	113	43	41	150	1	LRMM_4	150	Gene LOC105369337		atherin-like	XM_011508322.1, XM_011545423.1
GeneID:55832	CAND1	12	67269281	67314692	45411	+	10	NDMM_1::3575, NDMM_2::3626, NDMM_3::2768, LRMM_1::4387, LRMM_2::4278, LRMM_3::2886, LRMM_3::2887, NDMM_4::4315, NDMM_4::4316, LRMM_4::4334	127, 127, 127, 127, 127, -737, 127, 127, 50303, 127	in gene, in gene, in gene, in gene, in gene, upstream, in gene, in gene, downstream, in gene	1	1	1	1	1	1	1	1	44	49	26.5	94.5	87	59.5	38	150	2	LRMM_1	172	Gene CAND1	FLJ10929, KIAA0829, CAND1, FLJ38691, FLJ10114, FLJ90441, TIP120A, TIP120, DKFZp434M1414	cullin-associated and neddylation-dissociated 1	NM_018448.4		NP_060918.2
GeneID:64852	TUT1	11	62575045	62591637	16592	-	28	NDMM_1::2581, NDMM_1::2582, NDMM_1::2583, NDMM_1::2584, NDMM_2::2603, NDMM_2::2604, NDMM_2::2605, NDMM_3::2041, NDMM_3::2042, NDMM_3::2043, LRMM_1::3252, LRMM_1::3253, LRMM_1::3254, LRMM_2::3156, LRMM_2::3157, LRMM_2::3158, LRMM_3::2122, LRMM_3::2123, LRMM_3::2124, NDMM_4::3081, NDMM_4::3082, NDMM_4::3083, NDMM_4::3084, NDMM_4::3085, LRMM_4::3136, LRMM_4::3137, LRMM_4::3138, LRMM_4::3139	17621, -203, -7675, -10347, 17621, -251, -9995, 17525, -299, -10123, 17621, -203, -10027, 17589, -203, -10251, 17621, -203, -10219, 24213, 17621, -299, -7691, -10219, 17621, -203, -7691, -10187	downstream, upstream, upstream, upstream, downstream, upstream, upstream, downstream, upstream, upstream, downstream, upstream, upstream, downstream, upstream, upstream, downstream, upstream, upstream, downstream, downstream, upstream, upstream, upstream, downstream, upstream, upstream, upstream	1	1	1	1	1	1	1	1	74.6	58.8	34.8	112.8	154.2	51	41.2	149.8	5	LRMM_1	382	Gene TUT1	STARPAP, FLJ22267, FLJ22347, MGC149809, URLC6, TUT1, PAPD2, FLJ21850, TUTase, RBM21, MGC131987	terminal uridylyl transferase 1, U6 snRNA-specific	NM_022830.2		NP_073741.2
GeneID:81533	ITFG1	16	47154387	47461274	306887	-	12	NDMM_1::6120, NDMM_2::5529, NDMM_3::4424, NDMM_3::4425, LRMM_1::6861, LRMM_1::6862, LRMM_2::6670, LRMM_2::6671, LRMM_3::4546, NDMM_4::6980, LRMM_4::6896, LRMM_4::6897	58, 74, 58, -710, 317018, 58, 154, -774, 58, 58, 316794, 90	in gene, in gene, in gene, upstream, downstream, in gene, in gene, upstream, in gene, in gene, downstream, in gene	1	1	1	1	1	1	1	1	65.5	105	75	107	198.5	103.5	84	149	2	LRMM_1	373	Gene ITFG1	CDA08, TIP, ITFG1, LNKN-1	integrin alpha FG-GAP repeat containing 1	NM_030790.4, NM_001305002.1		NP_110417.2, NP_001291931.1
GeneID:2932	GSK3B	3	119821321	120094417	273096	-	9	NDMM_1::11049, NDMM_2::10462, NDMM_3::8028, NDMM_3::8029, LRMM_1::13237, LRMM_2::12413, LRMM_3::8446, NDMM_4::13440, LRMM_4::12816	-463, -559, -15, -1135, -623, -591, -943, -623, -463	upstream, upstream, upstream, upstream, upstream, upstream, upstream, upstream, upstream	1	1	1	1	1	1	1	1	116	70	48	158	271	82	46	149	1	LRMM_1	271	Gene GSK3B	GSK3B	glycogen synthase kinase 3 beta	NM_002093.3, NM_001146156.1, XM_006713610.1, XM_006713611.1		NP_002084.2, NP_001139628.1, XP_006713673.1, XP_006713674.1
GeneID:8036	SHOC2	10	110919543	111013667	94124	+	8	NDMM_1::2152, NDMM_2::2190, NDMM_3::1748, LRMM_1::2724, LRMM_2::2716, LRMM_3::1820, NDMM_4::2562, LRMM_4::2678	-759, -599, -439, -759, -759, -759, -247, -247	upstream, upstream, upstream, upstream, upstream, upstream, upstream, upstream	1	1	1	1	1	1	1	1	64	70	57	110	131	67	46	149	1	LRMM_4	149	Gene SHOC2	SUR8, SIAA0862, KIAA0862, SOC-2, FLJ60412, SOC2, SHOC2, SUR-8	SHOC2 leucine-rich repeat scaffold protein	NM_007373.3, NM_001269039.1, XM_011540216.1		NP_031399.2, NP_001255968.1
GeneID:406881	MIRLET7A1	9	94175957	94176036	79	+	8	NDMM_1::16368, NDMM_2::15293, NDMM_3::11715, LRMM_1::19555, LRMM_2::18597, LRMM_3::12220, NDMM_4::19790, LRMM_4::18321	-9461, -9653, -9813, -9493, -9589, -9701, -9802, -9813	upstream, upstream, upstream, upstream, upstream, upstream, upstream, upstream	1	1	1	1	1	1	1	1	84	45	41	140	312	54	42	149	1	LRMM_1	312	Gene MIRLET7A1	MIRNLET7A1, LET7A1, MIRLET7A1, let-7a-1	microRNA let-7a-1
GeneID:406888	MIRLET7F1	9	94176347	94176433	86	+	8	NDMM_1::16368, NDMM_2::15293, NDMM_3::11715, LRMM_1::19555, LRMM_2::18597, LRMM_3::12220, NDMM_4::19790, LRMM_4::18321	-9851, -10043, -10203, -9883, -9979, -10091, -10192, -10203	upstream, upstream, upstream, upstream, upstream, upstream, upstream, upstream	1	1	1	1	1	1	1	1	84	45	41	140	312	54	42	149	1	LRMM_1	312	Gene MIRLET7F1	LET7F1, let-7f-1, MIRLET7F1, MIRNLET7F1	microRNA let-7f-1
GeneID:158257	MIRLET7DHG	9	94176569	94204566	27997	-	8	NDMM_1::16368, NDMM_2::15293, NDMM_3::11715, LRMM_1::19555, LRMM_2::18597, LRMM_3::12220, NDMM_4::19790, LRMM_4::18321	38070, 38262, 38422, 38102, 38198, 38310, 38411, 38422	downstream, downstream, downstream, downstream, downstream, downstream, downstream, downstream	1	1	1	1	1	1	1	1	84	45	41	140	312	54	42	149	1	LRMM_1	312	Gene MIRLET7DHG	MIRLET7DHG	MIRLET7D host gene	NR_046163.1, NR_046165.1
GeneID:7536	SF1	11	64764604	64778844	14240	-	8	NDMM_1::2638, NDMM_2::2652, NDMM_3::2079, LRMM_1::3315, LRMM_2::3212, LRMM_3::2160, NDMM_4::3135, LRMM_4::3197	-164, -132, -68, -132, -4, -36, -36, -36	upstream, upstream, upstream, upstream, upstream, upstream, upstream, upstream	1	1	1	1	1	1	1	1	95	44	38	106	210	82	37	149	1	LRMM_1	210	Gene SF1	SF1, MBBP, ZNF162, D11S636, ZFM1, ZCCHC25	splicing factor 1	NM_001178030.1, NM_001178031.1, NM_004630.3, NM_201995.2, NM_201997.2, NM_201998.2, NR_033649.1, NR_033650.1, XM_011545244.1, XM_011545245.1, XM_011545246.1, XM_011545247.1, XM_011545248.1		NP_001171501.1, NP_001171502.1, NP_004621.2, NP_973724.1, NP_973726.2, NP_973727.1
GeneID:1943	EFNA2	19	1286154	1301431	15277	+	1	LRMM_1::8538	-10506	upstream	0	0	0	0	1	0	0	0	59	36	18	125	206	32	21	149	1	LRMM_1	206	Gene EFNA2	LERK6, HEK7-L, EFNA2, EPLG6, ELF-1	ephrin-A2	NM_001405.3		NP_001396.2
GeneID:1198	CLK3	15	74598476	74645418	46942	+	33	NDMM_1::5544, NDMM_1::5545, NDMM_1::5546, NDMM_1::5547, NDMM_2::5047, NDMM_2::5048, NDMM_2::5049, NDMM_3::4090, NDMM_3::4091, NDMM_3::4092, NDMM_3::4093, NDMM_3::4094, LRMM_1::6252, LRMM_1::6253, LRMM_1::6254, LRMM_2::6123, LRMM_2::6124, LRMM_2::6125, LRMM_2::6126, LRMM_3::4178, LRMM_3::4179, LRMM_3::4180, NDMM_4::6338, NDMM_4::6339, NDMM_4::6340, NDMM_4::6341, NDMM_4::6342, LRMM_4::6267, LRMM_4:…	-140, 16372, 17380, 28980, -12, 17396, 29012, -172, 16324, 17140, 17556, 28980, -172, 17172, 29140, 84, 17396, 17876, 28980, -172, 17204, 28892, -172, 16372, 17172, 28788, 36916, 36, 16404, 17364, 22740, 28980, 36884	upstream, in gene, in gene, in gene, upstream, in gene, in gene, upstream, in gene, in gene, in gene, in gene, upstream, in gene, in gene, in gene, in gene, in gene, in gene, upstream, in gene, in gene, upstream, in gene, in gene, in gene, in gene, in gene, in gene, in gene, in gene, in gene, in gene	1	1	1	1	1	1	1	1	75	53.4	31.6	65.4	86.4	42	29.8	148.8	5	LRMM_4	371	Gene CLK3	PHCLK3, CLK3, PHCLK3/152, FLJ22858	CDC like kinase 3	NM_003992.4, NM_001130028.1, XM_011521205.1, XM_005254151.2, XM_011521206.1, XM_011521207.1, XR_931746.1, XM_011521208.1, XM_011521209.1, XM_011521210.1, XM_005254153.3, XM_006720384.2		NP_003983.2, NP_001123500.1
GeneID:101929639	B4GALT1-AS1	9	33166948	33179983	13035	+	17	NDMM_1::16150, NDMM_1::16151, NDMM_1::16152, NDMM_2::15091, NDMM_2::15092, NDMM_3::11567, LRMM_1::19250, LRMM_1::19251, LRMM_2::18388, NDMM_4::19522, NDMM_4::19523, NDMM_4::19524, LRMM_4::18063, LRMM_4::18064, LRMM_4::18065, LRMM_4::18066, LRMM_4::18067	-7588, 204, 700, -7556, 188, -7972, -372, 252, -20, -7396, 252, 700, -7972, -7284, -5700, 220, 700	upstream, in gene, in gene, upstream, in gene, upstream, upstream, in gene, upstream, upstream, in gene, in gene, upstream, upstream, upstream, in gene, in gene	1	1	1	1	1	1	0	1	53.2	36.6	24	47	24	19.4	26.6	148.8	5	LRMM_4	219	Gene B4GALT1-AS1	RP11-326F20.5, B4GALT1-AS1	B4GALT1 antisense RNA 1	NR_108108.1, NR_108109.1, NR_108110.1
GeneID:7295	TXN	9	110243812	110256640	12828	-	10	NDMM_1::16460, NDMM_2::15385, NDMM_3::11774, LRMM_1::19705, LRMM_1::19706, LRMM_2::18722, LRMM_3::12285, NDMM_4::19919, LRMM_4::18446, LRMM_4::18447	-144, -320, -96, 816, -160, -176, -192, -160, 512, -128	upstream, upstream, upstream, in gene, upstream, upstream, upstream, upstream, in gene, upstream	1	1	1	1	1	1	1	1	83	52	38	146	137	64	39.5	148.5	2	NDMM_4	256	Gene TXN	DKFZp686B1993, TRX, TRX1, MGC61975, TXN, TRDX	thioredoxin	NM_001244938.1, NM_003329.3		NP_001231867.1, NP_003320.2
GeneID:10560	SLC19A2	1	169463909	169486079	22170	-	8	NDMM_1::1131, NDMM_2::1135, NDMM_3::878, LRMM_1::1412, LRMM_2::1362, LRMM_3::986, NDMM_4::1219, LRMM_4::1426	223, 287, 287, 287, 287, 287, 159, 159	in gene, in gene, in gene, in gene, in gene, in gene, in gene, in gene	1	1	1	1	1	1	1	1	80	81	85	76	160	149	85	148	1	LRMM_1	160	Gene SLC19A2	TRMA, TC1, SLC19A2, THT1, THTR1, THMD1		NM_006996.2, XM_011509076.1, XM_011509077.1		NP_008927.1
GeneID:105371439	LOC105371439	1	151273221	151278047	4826	-	12	NDMM_1::928, NDMM_1::929, NDMM_2::914, NDMM_2::915, NDMM_3::715, LRMM_1::1083, LRMM_2::1034, LRMM_2::1035, LRMM_3::770, LRMM_3::771, NDMM_4::928, LRMM_4::1113	-4065, -5089, -4193, -4833, -4193, -4193, -4065, -4833, -4193, -5169, -4097, -4033	upstream, upstream, upstream, upstream, upstream, upstream, upstream, upstream, upstream, upstream, upstream, upstream	1	1	1	1	1	1	1	1	55	70.5	40.5	93.5	160	122.5	67	148	2	LRMM_1	258	Gene LOC105371439		uncharacterized LOC105371439	XR_917698.1, XR_922136.1
GeneID:100507670	LOC100507670	1	151279896	151281929	2033	-	12	NDMM_1::928, NDMM_1::929, NDMM_2::914, NDMM_2::915, NDMM_3::715, LRMM_1::1083, LRMM_2::1034, LRMM_2::1035, LRMM_3::770, LRMM_3::771, NDMM_4::928, LRMM_4::1113	-183, -1207, -311, -951, -311, -311, -183, -951, -311, -1287, -215, -151	upstream, upstream, upstream, upstream, upstream, upstream, upstream, upstream, upstream, upstream, upstream, upstream	1	1	1	1	1	1	1	1	55	70.5	40.5	93.5	160	122.5	67	148	2	LRMM_1	258	Gene LOC100507670		uncharacterized LOC100507670	XR_171215.3, XR_108348.3
GeneID:148229	ATP8B3	19	1782070	1812276	30206	-	8	NDMM_1::7356, NDMM_2::6823, NDMM_3::5436, LRMM_1::8558, LRMM_2::8287, LRMM_3::5588, NDMM_4::8667, LRMM_4::8575	-332, -300, -332, -332, -396, -332, -332, -300	upstream, upstream, upstream, upstream, upstream, upstream, upstream, upstream	1	1	1	1	1	1	1	1	95	44	51	204	98	71	61	148	1	NDMM_4	204	Gene ATP8B3	ATP8B3, ATPIK	ATPase phospholipid transporting 8B3	NM_001178002.2, NM_138813.3, NR_047593.2, XM_006722654.2, XM_006722655.2, XM_011527707.1, XM_011527708.1, XM_011527709.1, XM_006722656.2, XM_011527710.1, XM_011527711.1, XM_006722657.2, XM_011527712.1, XR_936159.1		NP_001171473.1, NP_620168.1
GeneID:100302210	MIR1909	19	1816159	1816238	79	-	8	NDMM_1::7356, NDMM_2::6823, NDMM_3::5436, LRMM_1::8558, LRMM_2::8287, LRMM_3::5588, NDMM_4::8667, LRMM_4::8575	3630, 3662, 3630, 3630, 3566, 3630, 3630, 3662	downstream, downstream, downstream, downstream, downstream, downstream, downstream, downstream	1	1	1	1	1	1	1	1	95	44	51	204	98	71	61	148	1	NDMM_4	204	Gene MIR1909	mir-1909, hsa-mir-1909, MIR1909, MIRN1909	microRNA 1909
GeneID:100288123	LOC100288123	19	1822089	1824543	2454	+	8	NDMM_1::7356, NDMM_2::6823, NDMM_3::5436, LRMM_1::8558, LRMM_2::8287, LRMM_3::5588, NDMM_4::8667, LRMM_4::8575	-9481, -9513, -9481, -9481, -9417, -9481, -9481, -9513	upstream, upstream, upstream, upstream, upstream, upstream, upstream, upstream	1	1	1	1	1	1	1	1	95	44	51	204	98	71	61	148	1	NDMM_4	204	Gene LOC100288123	FLJ43549	uncharacterized LOC100288123	NR_034114.1
GeneID:122622	ADSSL1	14	104724197	104747325	23128	+	9	NDMM_1::4969, NDMM_2::4641, NDMM_2::4642, NDMM_3::3785, LRMM_1::5761, LRMM_2::5665, LRMM_3::3836, NDMM_4::5856, LRMM_4::5738	28539, 28635, 29083, 28795, 28635, 28795, 28443, 28651, 28667	downstream, downstream, downstream, downstream, downstream, downstream, downstream, downstream, downstream	1	1	1	1	1	1	1	1	73	33	52	168	116	81	55	148	1	NDMM_4	168	Gene ADSSL1	ADSSL1, FLJ38602	adenylosuccinate synthase like 1	NM_199165.1, NM_152328.3, XM_011536412.1, XM_006720026.2, XM_011536413.1, XM_011536414.1, XM_011536415.1		NP_954634.1, NP_689541.1
GeneID:10572	SIVA1	14	104752420	104759659	7239	+	9	NDMM_1::4969, NDMM_2::4641, NDMM_2::4642, NDMM_3::3785, LRMM_1::5761, LRMM_2::5665, LRMM_3::3836, NDMM_4::5856, LRMM_4::5738	316, 412, 860, 572, 412, 572, 220, 428, 444	in gene, in gene, in gene, in gene, in gene, in gene, in gene, in gene, in gene	1	1	1	1	1	1	1	1	73	33	52	168	116	81	55	148	1	NDMM_4	168	Gene SIVA1	Siva-2, SIVA, CD27BP, Siva-1, SIVA1	SIVA1 apoptosis inducing factor	NM_006427.3, NM_021709.2, XM_011536360.1		NP_006418.2, NP_068355.1
GeneID:100532746	PPT2-EGFL8	6	32153999	32168285	14286	+	8	NDMM_1::13607, NDMM_2::12881, NDMM_3::9733, LRMM_1::15975, LRMM_2::15658, LRMM_3::10249, NDMM_4::16387, LRMM_4::15532	24113, 24113, 24241, 24113, 24225, 24241, 24241, 24305	downstream, downstream, downstream, downstream, downstream, downstream, downstream, downstream	1	1	1	1	1	1	1	1	89	65	62	198	153	79	50	148	1	NDMM_4	198	Gene PPT2-EGFL8	FLJ78536, PPT2-EGFL8, FLJ97375, FLJ52513	PPT2-EGFL8 readthrough (NMD candidate)	NR_037861.1
GeneID:80864	EGFL8	6	32164605	32168285	3680	+	8	NDMM_1::13607, NDMM_2::12881, NDMM_3::9733, LRMM_1::15975, LRMM_2::15658, LRMM_3::10249, NDMM_4::16387, LRMM_4::15532	13507, 13507, 13635, 13507, 13619, 13635, 13635, 13699	downstream, downstream, downstream, downstream, downstream, downstream, downstream, downstream	1	1	1	1	1	1	1	1	89	65	62	198	153	79	50	148	1	NDMM_4	198	Gene EGFL8	MGC59719, EGFL8, FLJ78536, FLJ97375, FLJ44493, MGC44938, C6orf8, NG3, FLJ75166, FLJ52513	EGF like domain multiple 8	NM_030652.3, NR_037860.1		NP_085155.1
GeneID:10554	AGPAT1	6	32168206	32178111	9905	-	8	NDMM_1::13607, NDMM_2::12881, NDMM_3::9733, LRMM_1::15975, LRMM_2::15658, LRMM_3::10249, NDMM_4::16387, LRMM_4::15532	-1, -1, -129, -1, -113, -129, -129, -193	upstream, upstream, upstream, upstream, upstream, upstream, upstream, upstream	1	1	1	1	1	1	1	1	89	65	62	198	153	79	50	148	1	NDMM_4	198	Gene AGPAT1	LPAATA, MGC5423, 1-AGPAT1, AGPAT1, MGC4007, G15, LPAAT-alpha		NM_032741.4, NM_006411.3, XM_005248806.1, XM_005274830.1, XM_005272762.1, XM_005275074.1, XM_005275204.1, XM_005275338.1, XM_005275505.1, XM_005248805.2, XM_005274829.2, XM_005272761.2, XM_005275073.2, XM_005275203.2, XM_005275337.2, XM_005275504.2, XM_01		NP_116130.2, NP_006402.1, XP_005248863.1, XP_005274887.1, XP_005272819.1, XP_005248862.1, XP_005274886.1, XP_005272818.1, XP_005275130.1, XP_005275131.1, XP_005275260.1, XP_005275261.1, XP_005275394.1, XP_005275395.1, XP_005275562.1, XP_005275561.1
GeneID:102466190	MIR6721	6	32170030	32170116	86	-	8	NDMM_1::13607, NDMM_2::12881, NDMM_3::9733, LRMM_1::15975, LRMM_2::15658, LRMM_3::10249, NDMM_4::16387, LRMM_4::15532	-7996, -7996, -8124, -7996, -8108, -8124, -8124, -8188	upstream, upstream, upstream, upstream, upstream, upstream, upstream, upstream	1	1	1	1	1	1	1	1	89	65	62	198	153	79	50	148	1	NDMM_4	198	Gene MIR6721	mir-6721, hsa-mir-6721, MIR6721	microRNA 6721
GeneID:102465500	MIR6833	6	32179816	32179876	60	+	8	NDMM_1::13607, NDMM_2::12881, NDMM_3::9733, LRMM_1::15975, LRMM_2::15658, LRMM_3::10249, NDMM_4::16387, LRMM_4::15532	-1704, -1704, -1576, -1704, -1592, -1576, -1576, -1512	upstream, upstream, upstream, upstream, upstream, upstream, upstream, upstream	1	1	1	1	1	1	1	1	89	65	62	198	153	79	50	148	1	NDMM_4	198	Gene MIR6833	hsa-mir-6833, MIR6833	microRNA 6833
GeneID:65996	CENPBD1P1	19	58575399	58584395	8996	+	15	NDMM_1::8150, NDMM_1::8151, NDMM_2::7521, NDMM_2::7522, NDMM_3::5854, NDMM_3::5855, LRMM_1::9481, LRMM_1::9482, LRMM_2::9016, LRMM_2::9017, LRMM_3::6109, NDMM_4::9698, NDMM_4::9699, LRMM_4::9526, LRMM_4::9527	-2375, 377, -2439, 185, -2183, 329, -2023, 185, -1927, 185, -1863, -2023, 185, -2439, 185	upstream, in gene, upstream, in gene, upstream, in gene, upstream, in gene, upstream, in gene, upstream, upstream, in gene, upstream, in gene	1	1	1	1	1	1	1	1	85.5	64.5	37.5	126.5	137	89.5	37.5	147.5	2	LRMM_1	168	Gene CENPBD1P1	FLJ18389, MGC149628, MGC111383, CENPBD1P1	CENPB DNA-binding domains containing 1 pseudogene 1	NR_026052.1
GeneID:101927572	LOC101927572	19	36014499	36045997	31498	+	15	NDMM_1::7783, NDMM_1::7784, NDMM_2::7184, NDMM_2::7185, NDMM_3::5652, LRMM_1::9085, LRMM_1::9086, LRMM_2::8685, LRMM_2::8686, LRMM_3::5855, LRMM_3::5856, NDMM_4::9236, NDMM_4::9237, LRMM_4::9085, LRMM_4::9086	-163, 39757, -163, 39773, 40061, -163, 39741, -243, 39773, -216, 40189, -163, 40061, -195, 39741	upstream, downstream, upstream, downstream, downstream, upstream, downstream, upstream, downstream, upstream, downstream, upstream, downstream, upstream, downstream	1	1	1	1	1	1	1	1	69.5	51	24.5	86.5	89.5	52	32.5	147.5	2	LRMM_4	233	Gene LOC101927572	AC002116.7	uncharacterized LOC101927572	NM_001290056.1		NP_001276985.1
GeneID:4931	NVL	1	224227334	224330201	102867	-	8	NDMM_1::1414, NDMM_2::1444, NDMM_3::1115, LRMM_1::1883, LRMM_2::1811, LRMM_3::1296, NDMM_4::1634, LRMM_4::1857	-103, -135, -71, -39, -71, -103, -103, -87	upstream, upstream, upstream, upstream, upstream, upstream, upstream, upstream	1	1	1	1	1	1	1	1	57	47	30	136	190	63	89	147	1	LRMM_1	190	Gene NVL	NVL, NVL2		NM_001243146.1, NM_001243147.1, NM_002533.3, NM_206840.2, XM_011544196.1, XM_011544197.1, XM_011544198.1, XM_011544199.1, XM_011544200.1, XM_011544201.1, XM_011544202.1		NP_001230075.1, NP_001230076.1, NP_002524.2, NP_996671.1
GeneID:100302125	MIR1289-1	20	35453954	35454097	143	-	8	NDMM_1::9619, NDMM_2::9013, NDMM_3::7008, LRMM_1::11399, LRMM_2::10806, LRMM_3::7340, NDMM_4::11628, LRMM_4::11234	-847, -879, -815, -815, -863, -847, -847, -847	upstream, upstream, upstream, upstream, upstream, upstream, upstream, upstream	1	1	1	1	1	1	1	1	87	60	49	129	255	76	68	147	1	LRMM_1	255	Gene MIR1289-1	hsa-mir-1289-1, MIRN1289-1, MIR1289-1	microRNA 1289-1
GeneID:51244	CCDC174	3	14651746	14672659	20913	+	8	NDMM_1::10503, NDMM_2::9901, NDMM_3::7619, LRMM_1::12567, LRMM_2::11813, LRMM_3::8042, NDMM_4::12822, LRMM_4::12244	-114, -66, -66, -66, 30, -98, -130, -114	upstream, upstream, upstream, upstream, in gene, upstream, upstream, upstream	1	1	1	1	1	1	1	1	81	56	48	129	214	95	50	147	1	LRMM_1	214	Gene CCDC174	HSPC212, FLJ33839, CCDC174, C3orf19, IHPMR	coiled-coil domain containing 174	NM_016474.4, XR_940449.1		NP_057558.3
GeneID:105376962	LOC105376962	3	14655640	14665801	10161	-	8	NDMM_1::10503, NDMM_2::9901, NDMM_3::7619, LRMM_1::12567, LRMM_2::11813, LRMM_3::8042, NDMM_4::12822, LRMM_4::12244	14169, 14121, 14121, 14121, 14025, 14153, 14185, 14169	downstream, downstream, downstream, downstream, downstream, downstream, downstream, downstream	1	1	1	1	1	1	1	1	81	56	48	129	214	95	50	147	1	LRMM_1	214	Gene LOC105376962		uncharacterized LOC105376962	XR_936647.1, XR_940613.1
GeneID:26046	LTN1	21	28928144	28992956	64812	-	16	NDMM_1::9905, NDMM_1::9906, NDMM_2::9311, NDMM_2::9312, NDMM_3::7190, NDMM_3::7191, LRMM_1::11859, LRMM_1::11860, LRMM_2::11135, LRMM_2::11136, LRMM_3::7575, LRMM_3::7576, NDMM_4::12043, NDMM_4::12044, LRMM_4::11585, LRMM_4::11586	188, -9892, 156, -9796, 156, -9892, 156, -9956, 156, -9892, 156, -9892, 156, -9892, 156, -9892	in gene, upstream, in gene, upstream, in gene, upstream, in gene, upstream, in gene, upstream, in gene, upstream, in gene, upstream, in gene, upstream	1	1	1	1	1	1	1	1	58.5	55	49	91	107.5	58	45	147	2	LRMM_4	165	Gene LTN1	FLJ11053, LTN1, KIAA0714, RNF160, C21orf98, ZNF294, C21orf10	listerin E3 ubiquitin protein ligase 1	NM_015565.2, XM_011529525.1, XM_006723987.2		NP_056380.2
GeneID:105372766	LOC105372766	21	28993096	28994162	1066	+	16	NDMM_1::9905, NDMM_1::9906, NDMM_2::9311, NDMM_2::9312, NDMM_3::7190, NDMM_3::7191, LRMM_1::11859, LRMM_1::11860, LRMM_2::11135, LRMM_2::11136, LRMM_3::7575, LRMM_3::7576, NDMM_4::12043, NDMM_4::12044, LRMM_4::11585, LRMM_4::11586	-328, 9752, -296, 9656, -296, 9752, -296, 9816, -296, 9752, -296, 9752, -296, 9752, -296, 9752	upstream, downstream, upstream, downstream, upstream, downstream, upstream, downstream, upstream, downstream, upstream, downstream, upstream, downstream, upstream, downstream	1	1	1	1	1	1	1	1	58.5	55	49	91	107.5	58	45	147	2	LRMM_4	165	Gene LOC105372766		uncharacterized LOC105372766	XR_920439.1, XR_937645.1
GeneID:203245	NAIF1	9	128061233	128067321	6088	-	9	NDMM_1::16599, NDMM_2::15495, NDMM_3::11867, NDMM_3::11868, LRMM_1::19866, LRMM_2::18865, LRMM_3::12382, NDMM_4::20088, LRMM_4::18582	-231, -327, -55, -535, -39, -631, -279, -679, -679	upstream, upstream, upstream, upstream, upstream, upstream, upstream, upstream, upstream	1	1	1	1	1	1	1	1	66	43	36	118	154	50	45	147	1	LRMM_1	154	Gene NAIF1	DKFZp762G199, C9orf90, RP11-379C10.2, bA379C10.2, NAIF1	nuclear apoptosis inducing factor 1	NM_197956.3, XR_242574.1, XR_428519.1		NP_931045.1
GeneID:102724057	LOC102724057	9	85756136	85805341	49205	-	8	NDMM_1::16313, NDMM_2::15247, NDMM_3::11684, LRMM_1::19477, LRMM_2::18538, LRMM_3::12178, NDMM_4::19719, LRMM_4::18262	-387, -387, -387, -211, -179, -387, -147, -131	upstream, upstream, upstream, upstream, upstream, upstream, upstream, upstream	1	1	1	1	1	1	1	1	56	61	42	95	120	58	43	147	1	LRMM_4	147	Gene LOC102724057		uncharacterized LOC102724057	XR_958524.1, XR_958526.1, XR_958527.1, XR_958528.1, XR_958529.1, XR_958530.1, XR_958531.1, XR_432458.2, XR_958532.1, XR_958533.1, XR_930057.1, XR_930058.1, XR_930059.1, XR_930060.1, XR_930061.1, XR_930062.1, XR_930063.1, XR_428562.2, XR_930064.1, XR_93006
GeneID:4849	CNOT3	19	54137689	54155708	18019	+	14	NDMM_1::8074, NDMM_1::8075, NDMM_2::7449, NDMM_2::7450, NDMM_3::5815, LRMM_1::9404, LRMM_1::9405, LRMM_2::8963, LRMM_2::8964, LRMM_3::6068, NDMM_4::9606, NDMM_4::9607, LRMM_4::9452, LRMM_4::9453	-57, 22183, -377, 22167, 87, -121, 22119, -313, 22183, -121, -153, 22183, -105, 22183	upstream, downstream, upstream, downstream, in gene, upstream, downstream, upstream, downstream, upstream, upstream, downstream, upstream, downstream	1	1	1	1	1	1	1	1	65.5	50.5	26.5	80	88	41.5	27	147	2	LRMM_4	155	Gene CNOT3	CNOT3, LENG2, NOT3H, NOT3, KIAA0691		NM_014516.3, XM_005277076.1, XM_005277078.1, XM_005277079.1, XR_254258.1, XM_005277266.1, XM_005277268.1, XM_005277269.1, XR_254309.1, XM_005278279.1, XM_005278281.1, XM_005278282.1, XR_254515.1, XM_006725771.1, XR_430984.1, XM_006726062.1, XM_006726162.1		NP_055331.1, XP_005277133.1, XP_005277135.1, XP_005277136.1, XP_005277323.1, XP_005277325.1, XP_005277326.1, XP_005278336.1, XP_005278338.1, XP_005278339.1, XP_006725834.1, XP_006726125.1, XP_006726225.1, XP_006726260.1, XP_006726262.1, XP_006726263.1
GeneID:102724273	LOC102724273	19	54146664	54152219	5555	-	14	NDMM_1::8074, NDMM_1::8075, NDMM_2::7449, NDMM_2::7450, NDMM_3::5815, LRMM_1::9404, LRMM_1::9405, LRMM_2::8963, LRMM_2::8964, LRMM_3::6068, NDMM_4::9606, NDMM_4::9607, LRMM_4::9452, LRMM_4::9453	14587, -7653, 14907, -7637, 14443, 14651, -7589, 14843, -7653, 14651, 14683, -7653, 14635, -7653	downstream, upstream, downstream, upstream, downstream, downstream, upstream, downstream, upstream, downstream, downstream, upstream, downstream, upstream	1	1	1	1	1	1	1	1	65.5	50.5	26.5	80	88	41.5	27	147	2	LRMM_4	155	Gene LOC102724273		uncharacterized LOC102724273	XR_433591.2, XR_919747.1, XR_430258.2, XR_936070.1, XR_952194.1, XR_952195.1, XR_431091.2, XR_952196.1, XR_952530.1, XR_952531.1, XR_431029.2, XR_952532.1, XR_952767.1, XR_952768.1, XR_952769.1, XR_952770.1, XR_952927.1, XR_952928.1, XR_952929.1, XR_95293
GeneID:80124	VCPIP1	8	66630253	66667217	36964	-	13	NDMM_1::15653, NDMM_1::15654, NDMM_2::14559, NDMM_2::14560, NDMM_3::11156, LRMM_1::18385, LRMM_2::17786, LRMM_2::17787, LRMM_3::11679, NDMM_4::18772, NDMM_4::18773, NDMM_4::18774, LRMM_4::17439	705, -15, 529, -47, 81, -15, 497, 17, -47, 28049, 785, -15, -79	in gene, upstream, in gene, upstream, in gene, upstream, in gene, in gene, upstream, in gene, in gene, upstream, upstream	1	1	1	1	1	1	1	1	39.5	28	25	88	122.5	44	24.5	147	2	LRMM_1	243	Gene VCPIP1	DUBA3, FLJ60694, FLJ23132, VCPIP1, DKFZp686G038, VCIP135, KIAA1850	valosin containing protein (p97)/p47 complex interacting protein 1	NM_025054.4		NP_079330.2
GeneID:9120	SLC16A6	17	68267026	68291264	24238	-	14	NDMM_1::6907, NDMM_2::6368, NDMM_3::5123, LRMM_1::7967, LRMM_1::7968, LRMM_2::7752, LRMM_3::5240, NDMM_4::8070, NDMM_4::8071, NDMM_4::8072, LRMM_4::7995, LRMM_4::7996, LRMM_4::7997, LRMM_4::7998	32192, 32181, 32208, 32128, -576, 32192, 32192, 32000, 27776, -864, 32128, 27904, 2592, -864	downstream, downstream, downstream, downstream, upstream, downstream, downstream, downstream, downstream, upstream, downstream, downstream, in gene, upstream	1	1	1	1	1	1	1	1	30	14	15.25	48.75	47.5	21	18	146.75	4	LRMM_4	227	Gene SLC16A6	SLC16A6, MCT6, MCT7		NM_001174166.1, NM_004694.4, XM_005257789.2, XM_011525461.1		NP_001167637.1, NP_004685.2
GeneID:10522	DEAF1	11	644220	695754	51534	-	13	NDMM_1::2264, NDMM_2::2314, NDMM_3::1834, NDMM_3::1835, LRMM_1::2858, LRMM_1::2859, LRMM_1::2860, LRMM_2::2837, LRMM_2::2838, LRMM_3::1902, LRMM_3::1903, NDMM_4::2685, LRMM_4::2795	266, 266, 426, -246, 52970, 49930, 266, 49994, 394, 52986, 362, 362, 362	in gene, in gene, in gene, upstream, downstream, in gene, in gene, in gene, in gene, downstream, in gene, in gene, in gene	1	1	1	1	1	1	1	1	57	59.5	19.667	112	205	50.333	29.333	146.333	3	LRMM_1	534	Gene DEAF1	NUDR, ZMYND5, DEAF1, SPN, MRD24	DEAF1, transcription factor	NM_021008.3, NM_001293634.1, XR_428838.2, XM_011519842.1, XM_011519843.1, XR_930843.1		NP_066288.2, NP_001280563.1
GeneID:105378483	LOC105378483	10	110564737	110567588	2851	-	8	NDMM_1::2144, NDMM_2::2182, NDMM_3::1741, LRMM_1::2720, LRMM_2::2708, LRMM_3::1813, NDMM_4::2554, LRMM_4::2668	132, 132, 100, 100, -28, 132, 100, 100	in gene, in gene, in gene, in gene, upstream, in gene, in gene, in gene	1	1	1	1	1	1	1	1	90	84	34	136	174	83	66	146	1	LRMM_1	174	Gene LOC105378483		uncharacterized LOC105378483	XR_959871.1, XR_946318.1
GeneID:9126	SMC3	10	110567691	110604634	36943	+	8	NDMM_1::2144, NDMM_2::2182, NDMM_3::1741, LRMM_1::2720, LRMM_2::2708, LRMM_3::1813, NDMM_4::2554, LRMM_4::2668	-235, -235, -203, -203, -75, -235, -203, -203	upstream, upstream, upstream, upstream, upstream, upstream, upstream, upstream	1	1	1	1	1	1	1	1	90	84	34	136	174	83	66	146	1	LRMM_1	174	Gene SMC3	HCAP, BAM, SMC3, CSPG6, SMC3L1, CDLS3, BMH	structural maintenance of chromosomes 3	NM_005445.3		NP_005436.1
GeneID:196483	EEF2KMT	16	5084300	5097820	13520	-	10	NDMM_1::5942, NDMM_2::5319, NDMM_3::4283, LRMM_1::6645, LRMM_2::6434, LRMM_3::4399, LRMM_3::4400, LRMM_3::4401, NDMM_4::6737, LRMM_4::6669	-292, -292, -292, -356, -292, 188, -292, -804, -292, -356	upstream, upstream, upstream, upstream, upstream, in gene, upstream, upstream, upstream, upstream	1	1	1	1	1	1	1	1	76	66	44	191	127	49	57	146	1	NDMM_4	191	Gene EEF2KMT	FAM86A, MGC19636, SB153, EEF2KMT, eEF2-KMT	eukaryotic elongation factor 2 lysine methyltransferase	NM_201400.3, NM_201598.3, NM_001289029.1, XM_005255157.3, XM_005255158.3, XM_011522404.1		NP_958802.1, NP_963892.1, NP_001275958.1
GeneID:79041	TMEM38A	19	16661127	16689019	27892	+	9	NDMM_1::7641, NDMM_1::7642, NDMM_2::7062, NDMM_3::5576, LRMM_1::8932, LRMM_2::8564, LRMM_3::5771, NDMM_4::9046, LRMM_4::8911	-823, -231, -1063, -871, -1063, -871, -871, -1063, -1063	upstream, upstream, upstream, upstream, upstream, upstream, upstream, upstream, upstream	1	1	1	1	1	1	1	1	73	74	46	148	249	89	44	146	1	LRMM_1	249	Gene TMEM38A	TMEM38A, TRICA, TRIC-A, MGC3169	transmembrane protein 38A	NM_024074.1		NP_076979.1
GeneID:23197	FAF2	5	176448306	176510074	61768	+	8	NDMM_1::13246, NDMM_2::12535, NDMM_3::9501, LRMM_1::15629, LRMM_2::15313, LRMM_3::9990, NDMM_4::15943, LRMM_4::15092	110, 78, 46, 78, 110, 78, 62, -82	in gene, in gene, in gene, in gene, in gene, in gene, in gene, upstream	1	1	1	1	1	1	1	1	63	48	39	64	123	80	35	146	1	LRMM_4	146	Gene FAF2	KIAA0887, FAF2, ETEA, UBXN3B, UBXD8	Fas associated factor family member 2	NM_014613.2, XM_011534475.1, XM_011534476.1		NP_055428.1
GeneID:105371835	LOC105371835	17	56835338	56843682	8344	-	19	NDMM_1::6781, NDMM_1::6782, NDMM_1::6783, NDMM_1::6784, NDMM_2::6246, NDMM_2::6247, NDMM_3::5037, NDMM_3::5038, NDMM_3::5039, LRMM_1::7822, LRMM_2::7586, LRMM_2::7587, LRMM_2::7588, LRMM_3::5134, LRMM_3::5135, NDMM_4::7915, NDMM_4::7916, LRMM_4::7782, LRMM_4::7783	10434, 9874, 9538, 8962, 9954, 9538, 10370, 9954, 9538, 9954, 9570, 9026, -7342, 9922, -7326, 9538, -7326, 9538, -7422	downstream, downstream, downstream, downstream, downstream, downstream, downstream, downstream, downstream, downstream, downstream, downstream, upstream, downstream, upstream, downstream, upstream, downstream, upstream	1	1	1	1	1	1	1	1	20.5	23	19	51	57	59	23.5	145.5	2	LRMM_4	248	Gene LOC105371835		uncharacterized LOC105371835	XR_918509.1, XR_934873.1
GeneID:57326	PBXIP1	1	154944080	154956091	12011	-	33	NDMM_1::974, NDMM_1::975, NDMM_1::976, NDMM_1::977, NDMM_2::966, NDMM_2::967, NDMM_2::968, NDMM_3::756, NDMM_3::757, NDMM_3::758, NDMM_3::759, LRMM_1::1145, LRMM_1::1146, LRMM_1::1147, LRMM_1::1148, LRMM_2::1116, LRMM_2::1117, LRMM_2::1118, LRMM_2::1119, LRMM_2::1120, LRMM_2::1121, LRMM_3::817, LRMM_3::818, LRMM_3::819, NDMM_4::1000, NDMM_4::1001, NDMM_4::1002, NDMM_4::1003, NDMM_4::1004, LRMM_4:…	18971, 13339, -165, -5893, 18971, 13627, -5541, 18939, 13467, 27, -5509, 18971, 13627, 59, -5509, 19035, 13275, 3963, 763, -149, -5813, 19003, 13435, -5509, 18971, 13531, 795, -165, -5509, 18971, 13627, -165, -5509	downstream, downstream, upstream, upstream, downstream, downstream, upstream, downstream, downstream, in gene, upstream, downstream, downstream, in gene, upstream, downstream, downstream, in gene, in gene, upstream, upstream, downstream, downstream, upstream, downstream, downstream, in gene, upstream, upstream, downstream, downstream, upstream, upstream	1	1	1	1	1	1	1	1	64	73	40.8	111.6	189.6	128.6	56	145.4	5	LRMM_1	559	Gene PBXIP1	HPIP, PBXIP1	pre-B-cell leukemia homeobox interacting protein 1	NM_020524.2		NP_065385.2
GeneID:1163	CKS1B	1	154974642	154979249	4607	+	24	NDMM_1::978, NDMM_1::979, NDMM_1::980, NDMM_2::969, NDMM_2::970, NDMM_2::971, NDMM_3::760, NDMM_3::761, NDMM_3::762, LRMM_1::1149, LRMM_1::1150, LRMM_1::1151, LRMM_2::1122, LRMM_2::1123, LRMM_2::1124, LRMM_3::820, LRMM_3::821, LRMM_3::822, NDMM_4::1005, NDMM_4::1006, NDMM_4::1007, LRMM_4::1201, LRMM_4::1202, LRMM_4::1203	-3858, 174, 8750, -3826, 206, 8622, -3922, 110, 8622, -3890, 206, 8558, -3826, 366, 8590, -3762, -242, 8734, -3826, -114, 8574, -3890, -114, 8590	upstream, in gene, downstream, upstream, in gene, downstream, upstream, in gene, downstream, upstream, in gene, downstream, upstream, in gene, downstream, upstream, upstream, downstream, upstream, upstream, downstream, upstream, upstream, downstream	1	1	1	1	1	1	1	1	52	45.333	34.333	97	166.667	105.667	61.333	145.333	3	LRMM_1	266	Gene CKS1B	PNAS-16, CKS1B, CKS1, PNAS-18, ckshs1	CDC28 protein kinase regulatory subunit 1B	NM_001826.2, NR_024163.1		NP_001817.1
GeneID:100423020	MIR4258	1	154975693	154975783	90	+	24	NDMM_1::978, NDMM_1::979, NDMM_1::980, NDMM_2::969, NDMM_2::970, NDMM_2::971, NDMM_3::760, NDMM_3::761, NDMM_3::762, LRMM_1::1149, LRMM_1::1150, LRMM_1::1151, LRMM_2::1122, LRMM_2::1123, LRMM_2::1124, LRMM_3::820, LRMM_3::821, LRMM_3::822, NDMM_4::1005, NDMM_4::1006, NDMM_4::1007, LRMM_4::1201, LRMM_4::1202, LRMM_4::1203	-4909, -877, 7699, -4877, -845, 7571, -4973, -941, 7571, -4941, -845, 7507, -4877, -685, 7539, -4813, -1293, 7683, -4877, -1165, 7523, -4941, -1165, 7539	upstream, upstream, downstream, upstream, upstream, downstream, upstream, upstream, downstream, upstream, upstream, downstream, upstream, upstream, downstream, upstream, upstream, downstream, upstream, upstream, downstream, upstream, upstream, downstream	1	1	1	1	1	1	1	1	52	45.333	34.333	97	166.667	105.667	61.333	145.333	3	LRMM_1	266	Gene MIR4258	MIR4258	microRNA 4258
GeneID:105370435	LOC105370435	14	31210782	31266718	55936	+	11	NDMM_1::4448, NDMM_2::4366, NDMM_3::3418, NDMM_3::3419, LRMM_1::5281, LRMM_2::5138, LRMM_3::3494, NDMM_4::5276, NDMM_4::5277, LRMM_4::5251, LRMM_4::5252	-3326, -2862, -3822, -3278, -3134, -2846, -3230, -3870, -2846, -3774, -2814	upstream, upstream, upstream, upstream, upstream, upstream, upstream, upstream, upstream, upstream, upstream	1	1	1	1	1	1	1	1	106	41	52	116	147	73	63	145	1	LRMM_1	147	Gene LOC105370435		uncharacterized LOC105370435	XR_915473.1, XR_943717.1
GeneID:79894	ZNF672	1	248838178	248849517	11339	+	17	NDMM_1::1543, NDMM_1::1544, NDMM_2::1583, NDMM_2::1584, NDMM_3::1217, NDMM_3::1218, LRMM_1::2085, LRMM_1::2086, LRMM_2::1965, LRMM_2::1966, LRMM_2::1967, LRMM_3::1399, LRMM_3::1400, NDMM_4::1823, NDMM_4::1824, LRMM_4::2025, LRMM_4::2026	62, 20734, -2, 20926, 414, 20958, 702, 20926, 446, 20638, 21054, 734, 20702, 734, 20894, 62, 20894	in gene, downstream, upstream, downstream, in gene, downstream, in gene, downstream, in gene, downstream, downstream, in gene, downstream, in gene, downstream, in gene, downstream	1	1	1	1	1	1	1	1	63	64	48	119.5	157.5	88.5	51.5	145	2	LRMM_1	227	Gene ZNF672	FLJ22301, ZNF672	zinc finger protein 672	XM_005270336.1, NM_024836.2		XP_005270393.1, NP_079112.1
GeneID:9825	SPATA2	20	49903391	49915543	12152	-	8	NDMM_1::9756, NDMM_2::9145, NDMM_3::7092, LRMM_1::11616, LRMM_2::10962, LRMM_3::7445, NDMM_4::11805, LRMM_4::11413	-105, -105, -41, -105, -105, -105, -105, -105	upstream, upstream, upstream, upstream, upstream, upstream, upstream, upstream	1	1	1	1	1	1	1	1	76	79	52	114	167	110	44	145	1	LRMM_1	167	Gene SPATA2	FLJ13167, tamo, PD1, KIAA0757, SPATA2, PPP1R145	spermatogenesis associated 2	NM_001135773.1, NM_006038.3, XM_006723894.1, XM_011529116.1		NP_001129245.1, NP_006029.1, XP_006723957.1
GeneID:26517	TIMM13	19	2425624	2427916	2292	-	9	NDMM_1::7379, NDMM_2::6835, NDMM_3::5448, LRMM_1::8588, LRMM_2::8317, LRMM_3::5610, NDMM_4::8697, NDMM_4::8698, LRMM_4::8604	204, 204, 156, 204, 108, 204, 396, 124, 156	in gene, in gene, in gene, in gene, in gene, in gene, in gene, in gene, in gene	1	1	1	1	1	1	1	1	82	47	23	109	184	52	43	145	1	LRMM_1	184	Gene TIMM13	ppv1, TIM13, TIMM13, TIM13B, TIMM13B, TIMM13A		NM_012458.3		NP_036590.1
GeneID:102466806	MIR7108	19	2434914	2435000	86	-	9	NDMM_1::7379, NDMM_2::6835, NDMM_3::5448, LRMM_1::8588, LRMM_2::8317, LRMM_3::5610, NDMM_4::8697, NDMM_4::8698, LRMM_4::8604	7288, 7288, 7240, 7288, 7192, 7288, 7480, 7208, 7240	downstream, downstream, downstream, downstream, downstream, downstream, downstream, downstream, downstream	1	1	1	1	1	1	1	1	82	47	23	109	184	52	43	145	1	LRMM_1	184	Gene MIR7108	MIR7108, hsa-mir-7108	microRNA 7108
GeneID:55172	DNAAF2	14	49625174	49635230	10056	-	19	NDMM_1::4508, NDMM_1::4509, NDMM_2::4403, NDMM_2::4404, NDMM_2::4405, NDMM_3::3474, NDMM_3::3475, LRMM_1::5355, LRMM_1::5356, LRMM_2::5230, LRMM_2::5231, LRMM_3::3539, LRMM_3::3540, LRMM_3::3541, NDMM_4::5348, NDMM_4::5349, LRMM_4::5302, LRMM_4::5303, LRMM_4::5304	14670, 766, 14654, 1246, 766, 14814, 574, 14462, 766, 14670, 734, 14638, 766, -130, 14654, 766, 14750, 766, -130	downstream, in gene, downstream, in gene, in gene, downstream, in gene, downstream, in gene, downstream, in gene, downstream, in gene, upstream, downstream, in gene, downstream, in gene, upstream	1	1	1	1	1	1	1	1	129	51.5	70	149	153.5	88	69	144.5	2	NDMM_4	169	Gene DNAAF2	C14orf104, PF13, KTU, CILD10, FLJ10563, DNAAF2	dynein (axonemal) assembly factor 2	NM_001083908.1, NM_018139.2		NP_001077377.1, NP_060609.2
GeneID:339192	LOC339192	17	45219313	45219974	661	-	15	NDMM_1::6695, NDMM_1::6696, NDMM_2::6157, NDMM_3::4980, LRMM_1::7684, LRMM_1::7685, LRMM_1::7686, LRMM_2::7481, LRMM_2::7482, LRMM_2::7483, LRMM_3::5074, NDMM_4::7812, NDMM_4::7813, LRMM_4::7659, LRMM_4::7660	-8378, -9242, -9306, -9082, -4314, -7290, -8954, -6170, -7290, -9167, -9082, -6138, -9274, -6234, -9114	upstream, upstream, upstream, upstream, upstream, upstream, upstream, upstream, upstream, upstream, upstream, upstream, upstream, upstream, upstream	1	1	1	1	1	1	1	1	61.8	60.8	53.4	101	107.8	102.8	72.2	144.4	5	LRMM_4	224	Gene LOC339192		uncharacterized LOC339192	XR_918431.1, XR_934785.1
GeneID:57003	CCDC47	17	63745250	63773728	28478	-	18	NDMM_1::6849, NDMM_1::6850, NDMM_1::6851, NDMM_2::6315, NDMM_2::6316, NDMM_3::5083, NDMM_3::5084, LRMM_1::7897, LRMM_1::7898, LRMM_2::7689, LRMM_2::7690, LRMM_3::5193, LRMM_3::5194, NDMM_4::7995, NDMM_4::7996, NDMM_4::7997, LRMM_4::7895, LRMM_4::7896	31904, 31200, -192, 32352, -192, 31968, -96, 32032, -192, 32016, -176, 32192, -192, 32000, 31264, -96, 32032, -192	downstream, downstream, upstream, downstream, upstream, downstream, upstream, downstream, upstream, downstream, upstream, downstream, upstream, downstream, downstream, upstream, downstream, upstream	1	1	1	1	1	1	1	1	50.667	38.333	29	67.667	141.333	42.667	38.667	144.333	3	LRMM_1	253	Gene CCDC47	GK001, CCDC47, MSTP041	coiled-coil domain containing 47	NM_020198.2, XM_005257527.1		NP_064583.2, XP_005257584.1
GeneID:727910	TLCD2	17	1702790	1710368	7578	-	13	NDMM_1::6321, NDMM_2::5789, NDMM_2::5790, NDMM_3::4646, LRMM_1::7206, LRMM_2::7004, LRMM_2::7005, LRMM_2::7006, LRMM_3::4771, NDMM_4::7274, NDMM_4::7275, LRMM_4::7152, LRMM_4::7153	-6016, -6080, -6752, -6016, -6112, -6096, -6656, -7392, -6208, -6080, -6784, -6080, -7104	upstream, upstream, upstream, upstream, upstream, upstream, upstream, upstream, upstream, upstream, upstream, upstream, upstream	1	1	1	1	1	1	1	1	52	33	43	137	80	47	60	144	1	LRMM_4	144	Gene TLCD2	TLCD2	TLC domain containing 2	NM_001164407.1		NP_001157879.1
GeneID:84981	MIR22HG	17	1711504	1716272	4768	-	13	NDMM_1::6321, NDMM_2::5789, NDMM_2::5790, NDMM_3::4646, LRMM_1::7206, LRMM_2::7004, LRMM_2::7005, LRMM_2::7006, LRMM_3::4771, NDMM_4::7274, NDMM_4::7275, LRMM_4::7152, LRMM_4::7153	-112, -176, -848, -112, -208, -192, -752, -1488, -304, -176, -880, -176, -1200	upstream, upstream, upstream, upstream, upstream, upstream, upstream, upstream, upstream, upstream, upstream, upstream, upstream	1	1	1	1	1	1	1	1	52	33	43	137	80	47	60	144	1	LRMM_4	144	Gene MIR22HG	MGC14376, MIR22HG, C17orf91, MGC149751, DKFZp686O06159	MIR22 host gene	NR_028502.1, NR_028503.1, NR_028504.1, NR_028505.1
GeneID:407004	MIR22	17	1713903	1713987	84	-	13	NDMM_1::6321, NDMM_2::5789, NDMM_2::5790, NDMM_3::4646, LRMM_1::7206, LRMM_2::7004, LRMM_2::7005, LRMM_2::7006, LRMM_3::4771, NDMM_4::7274, NDMM_4::7275, LRMM_4::7152, LRMM_4::7153	-2397, -2461, -3133, -2397, -2493, -2477, -3037, -3773, -2589, -2461, -3165, -2461, -3485	upstream, upstream, upstream, upstream, upstream, upstream, upstream, upstream, upstream, upstream, upstream, upstream, upstream	1	1	1	1	1	1	1	1	52	33	43	137	80	47	60	144	1	LRMM_4	144	Gene MIR22	miR-22, hsa-mir-22, MIRN22, MIR22	microRNA 22
GeneID:124997	WDR81	17	1716523	1738599	22076	+	13	NDMM_1::6321, NDMM_2::5789, NDMM_2::5790, NDMM_3::4646, LRMM_1::7206, LRMM_2::7004, LRMM_2::7005, LRMM_2::7006, LRMM_3::4771, NDMM_4::7274, NDMM_4::7275, LRMM_4::7152, LRMM_4::7153	-139, -75, 597, -139, -43, -59, 501, 1237, 53, -75, 629, -75, 949	upstream, upstream, in gene, upstream, upstream, upstream, in gene, in gene, in gene, upstream, in gene, upstream, in gene	1	1	1	1	1	1	1	1	52	33	43	137	80	47	60	144	1	LRMM_4	144	Gene WDR81	CAMRQ2, WDR81, FLJ23776, FLJ33817, PPP1R166, SORF-2	WD repeat domain 81	NM_001163673.1, NM_001163809.1, NM_152348.3, NM_001163811.1, XM_005256454.2, XR_933973.1, XM_011523650.1, XM_011523651.1, XM_006725254.2, XR_951938.1, XM_011546753.1		NP_001157145.1, NP_001157281.1, NP_689561.2, NP_001157283.1
GeneID:7690	ZNF131	5	43120888	43176324	55436	+	9	NDMM_1::12430, NDMM_2::11823, NDMM_3::8985, LRMM_1::14760, LRMM_2::14356, LRMM_2::14357, LRMM_3::9466, NDMM_4::15092, LRMM_4::14227	456, 440, 552, 456, 72, 573, 456, 456, 456	in gene, in gene, in gene, in gene, in gene, in gene, in gene, in gene, in gene	1	1	1	1	1	1	1	1	102	56	36	122	198	86	57	144	1	LRMM_1	198	Gene ZNF131	ZBTB35, pHZ-10, ZNF131	zinc finger protein 131	NM_001297548.1, NM_003432.2, NR_123720.1, NR_123719.1, XM_005248359.2, XM_005248361.2, XM_005248360.2, XM_005248363.3, XM_005248362.3, XM_005248365.2, XM_011514123.1, XM_011514124.1, XM_005248367.2		NP_001284477.1, NP_003423.1
GeneID:101928068	LOC101928068	1	244965204	244970869	5665	-	15	NDMM_1::1528, NDMM_1::1529, NDMM_1::1530, NDMM_2::1568, NDMM_2::1569, NDMM_3::1205, NDMM_3::1206, LRMM_1::2065, LRMM_2::1944, LRMM_2::1945, LRMM_3::1390, LRMM_3::1391, NDMM_4::1804, LRMM_4::2008, LRMM_4::2009	981, 661, -235, 405, -43, 725, -11, -43, 757, -43, 437, -75, -43, 437, -43	in gene, in gene, upstream, in gene, upstream, in gene, upstream, upstream, in gene, upstream, in gene, upstream, upstream, in gene, upstream	1	1	1	1	1	1	1	1	98	92	40	202	325	131	50	144	1	LRMM_1	325	Gene LOC101928068		uncharacterized LOC101928068	NR_111907.1
GeneID:105371798	LOC105371798	17	46909742	46912793	3051	-	3	NDMM_1::6716, LRMM_2::7501, NDMM_4::7839	-10167, -10183, -10183	upstream, upstream, upstream	1	0	0	1	0	1	0	0	73	76	46	85	135	72	36	144	1	LRMM_4	144	Gene LOC105371798		uncharacterized LOC105371798	XR_918439.1, XR_934807.1
GeneID:9570	GOSR2	17	46923114	46967000	43886	+	8	NDMM_1::6716, NDMM_2::6175, NDMM_3::4991, LRMM_1::7717, LRMM_2::7501, LRMM_3::5091, NDMM_4::7839, LRMM_4::7687	-154, -138, -138, -138, -138, -31, -138, -138	upstream, upstream, upstream, upstream, upstream, upstream, upstream, upstream	1	1	1	1	1	1	1	1	73	76	46	85	135	72	36	144	1	LRMM_4	144	Gene GOSR2	GS27, Bos1, GOSR2, EPM6	golgi SNAP receptor complex member 2	NM_054022.2, NM_004287.3, NM_001012511.1, XM_011525497.1, XM_005257843.2, XM_011525498.1, XR_934613.1, XM_006722190.2, XM_011525499.1, XR_934614.1, XM_011525500.1, XR_934615.1, XR_934616.1, XR_934617.1, XR_934618.1, XR_934619.1, XR_934620.1, XM_011525501.		NP_473363.1, NP_004278.2, NP_001012529.1
GeneID:254100	SSSCA1-AS1	11	65569220	65570413	1193	-	10	NDMM_1::2668, NDMM_1::2669, NDMM_2::2677, NDMM_3::2109, LRMM_1::3360, LRMM_2::3250, LRMM_3::2187, NDMM_4::3171, LRMM_4::3238, LRMM_4::3239	493, -7379, 77, 525, 237, 429, 237, 221, 237, -7219	in gene, upstream, in gene, in gene, in gene, in gene, in gene, in gene, in gene, upstream	1	1	1	1	1	1	1	1	72.5	51	36.5	84	146	56	33	144	2	LRMM_4	238	Gene SSSCA1-AS1	SSSCA1-AS1	SSSCA1 antisense RNA 1 (head to head)	NR_038923.1
GeneID:10534	SSSCA1	11	65570459	65571888	1429	+	10	NDMM_1::2668, NDMM_1::2669, NDMM_2::2677, NDMM_3::2109, LRMM_1::3360, LRMM_2::3250, LRMM_3::2187, NDMM_4::3171, LRMM_4::3238, LRMM_4::3239	-539, 7333, -123, -571, -283, -475, -283, -267, -283, 7173	upstream, downstream, upstream, upstream, upstream, upstream, upstream, upstream, upstream, downstream	1	1	1	1	1	1	1	1	72.5	51	36.5	84	146	56	33	144	2	LRMM_4	238	Gene SSSCA1	SSSCA1, p27	Sjogren syndrome/scleroderma autoantigen 1	NM_001303024.1, NM_006396.2		NP_001289953.1, NP_006387.1
GeneID:23625	FAM89B	11	65572349	65574198	1849	+	10	NDMM_1::2668, NDMM_1::2669, NDMM_2::2677, NDMM_3::2109, LRMM_1::3360, LRMM_2::3250, LRMM_3::2187, NDMM_4::3171, LRMM_4::3238, LRMM_4::3239	-2429, 5443, -2013, -2461, -2173, -2365, -2173, -2157, -2173, 5283	upstream, downstream, upstream, upstream, upstream, upstream, upstream, upstream, upstream, downstream	1	1	1	1	1	1	1	1	72.5	51	36.5	84	146	56	33	144	2	LRMM_4	238	Gene FAM89B	MTVR1, FAM89B, MTVR, LRAP25	family with sequence similarity 89 member B	NM_152832.2, NM_001098784.1, NM_001098785.1		NP_690045.1, NP_001092254.1, NP_001092255.1
GeneID:54543	TOMM7	7	22812632	22822852	10220	-	8	NDMM_1::14510, NDMM_2::13564, NDMM_3::10399, LRMM_1::16931, LRMM_2::16652, LRMM_3::10940, NDMM_4::17464, LRMM_4::16364	-60, 84, 100, 36, 68, 4, -60, 4	upstream, in gene, in gene, in gene, in gene, in gene, upstream, in gene	1	1	1	1	1	1	1	1	59	42	50	79	233	56	32	144	1	LRMM_1	233	Gene TOMM7	TOMM7, TOM7	translocase of outer mitochondrial membrane 7	NM_019059.3		NP_061932.1
GeneID:26589	MRPL46	15	88459478	88467402	7924	-	8	NDMM_1::5718, NDMM_2::5160, NDMM_3::4164, LRMM_1::6399, LRMM_2::6243, LRMM_3::4259, NDMM_4::6487, LRMM_4::6433	-86, -134, -246, -118, -150, -86, -182, -118	upstream, upstream, upstream, upstream, upstream, upstream, upstream, upstream	1	1	1	1	1	1	1	1	91	51	17	71	82	34	28	144	1	LRMM_4	144	Gene MRPL46	LIECG2, P2ECSL, MRPL46, MGC22762, C15orf4	mitochondrial ribosomal protein L46	NM_022163.3		NP_071446.2
GeneID:64963	MRPS11	15	88467453	88478630	11177	+	8	NDMM_1::5718, NDMM_2::5160, NDMM_3::4164, LRMM_1::6399, LRMM_2::6243, LRMM_3::4259, NDMM_4::6487, LRMM_4::6433	35, 83, 195, 67, 99, 35, 131, 67	in gene, in gene, in gene, in gene, in gene, in gene, in gene, in gene	1	1	1	1	1	1	1	1	91	51	17	71	82	34	28	144	1	LRMM_4	144	Gene MRPS11	MRPS11, FLJ23406, FLJ22512, HCC-2	mitochondrial ribosomal protein S11	NM_022839.3, NM_176805.2, XM_005254977.2, XM_005254978.2, XM_011521946.1, XM_011521947.1		NP_073750.2, NP_789775.1
GeneID:84288	EFCAB2	1	244969739	245125228	155489	+	16	NDMM_1::1528, NDMM_1::1529, NDMM_1::1530, NDMM_2::1568, NDMM_2::1569, NDMM_3::1205, NDMM_3::1206, LRMM_1::2065, LRMM_1::2066, LRMM_2::1944, LRMM_2::1945, LRMM_3::1390, LRMM_3::1391, NDMM_4::1804, LRMM_4::2008, LRMM_4::2009	149, 469, 1365, 725, 1173, 405, 1141, 1173, 60085, 373, 1173, 693, 1205, 1173, 693, 1173	in gene, in gene, in gene, in gene, in gene, in gene, in gene, in gene, in gene, in gene, in gene, in gene, in gene, in gene, in gene, in gene	1	1	1	1	1	1	1	1	98	48.5	22	102	174.5	69	26	144	2	LRMM_1	325	Gene EFCAB2	CFAP200, FLJ33608, DRC8, MGC12458, EFCAB2	EF-hand calcium binding domain 2	NM_032328.3, NR_026587.1, NM_001143943.1, NM_001290327.1, XM_011544300.1, XM_011544301.1, XM_011544302.1		NP_115704.1, NP_001137415.1, NP_001277256.1
GeneID:84074	QRICH2	17	76274049	76308690	34641	-	14	NDMM_1::6962, NDMM_1::6963, NDMM_1::6964, NDMM_2::6428, NDMM_3::5171, LRMM_1::8055, LRMM_1::8056, LRMM_1::8057, LRMM_2::7825, LRMM_3::5274, NDMM_4::8147, NDMM_4::8148, LRMM_4::8097, LRMM_4::8098	43570, 36770, 36354, 43634, 36562, 43602, 36850, 36162, 43586, 43570, 43586, 36658, 43570, 36578	downstream, downstream, downstream, downstream, downstream, downstream, downstream, downstream, downstream, downstream, downstream, downstream, downstream, downstream	1	1	1	1	1	1	1	1	45.5	19.5	29.5	85	99	43	26	144	2	LRMM_4	175	Gene QRICH2	QRICH2, DKFZp434P0316	glutamine rich 2	NM_032134.2, NR_130649.1, XM_005257728.2, XM_011525344.1, XM_006722136.2		NP_115510.1
GeneID:57462	KIAA1161	9	34366666	34376896	10230	-	11	NDMM_1::16173, NDMM_2::15110, NDMM_3::11584, LRMM_1::19278, LRMM_1::19279, LRMM_2::18403, LRMM_3::12075, NDMM_4::19547, NDMM_4::19548, LRMM_4::18098, LRMM_4::18099	-288, -160, -128, -176, -2560, -128, 48, -160, -2752, -160, -2688	upstream, upstream, upstream, upstream, upstream, upstream, in gene, upstream, upstream, upstream, upstream	1	1	1	1	1	1	1	1	48.5	32.5	23.5	62.5	94.5	16.5	20.5	144	2	LRMM_4	209	Gene KIAA1161	KIAA1161, NET37	KIAA1161	NM_020702.4, XM_011517966.1		NP_065753.2
GeneID:84688	C9orf24	9	34379019	34398577	19558	-	11	NDMM_1::16173, NDMM_2::15110, NDMM_3::11584, LRMM_1::19278, LRMM_1::19279, LRMM_2::18403, LRMM_3::12075, NDMM_4::19547, NDMM_4::19548, LRMM_4::18098, LRMM_4::18099	21393, 21521, 21553, 21505, 19121, 21553, 21729, 21521, 18929, 21521, 18993	downstream, downstream, downstream, downstream, in gene, downstream, downstream, downstream, in gene, downstream, in gene	1	1	1	1	1	1	1	1	48.5	32.5	23.5	62.5	94.5	16.5	20.5	144	2	LRMM_4	209	Gene C9orf24	MGC33614, MGC32921, SMRP1, NYD-SP22, C9orf24, bA573M23.4, CBE1	chromosome 9 open reading frame 24	NM_147168.1, NM_032596.3, NM_001252195.1, NM_147169.2, XM_005251616.3, XM_005251618.3, XM_011518055.1		NP_671697.1, NP_115985.2, NP_001239124.1, NP_671698.1
GeneID:105371872	LOC105371872	17	68460560	68468505	7945	+	11	NDMM_1::6908, LRMM_1::7970, LRMM_1::7971, LRMM_2::7753, NDMM_4::8076, NDMM_4::8077, NDMM_4::8078, LRMM_4::8004, LRMM_4::8005, LRMM_4::8006, LRMM_4::8007	-2720, -3248, -2672, -2640, -3232, -2736, 1264, -3248, -2768, 1232, 2448	upstream, upstream, upstream, upstream, upstream, upstream, in gene, upstream, upstream, in gene, in gene	1	0	0	1	1	1	0	1	24.5	24	18.5	52.75	85.75	26.25	28.5	143.75	4	LRMM_4	226	Gene LOC105371872		uncharacterized LOC105371872	XR_918574.1, XR_934941.1
GeneID:102157402	AK6	5	69351726	69370013	18287	-	17	NDMM_1::12561, NDMM_1::12562, NDMM_1::12563, NDMM_2::11943, NDMM_2::11944, NDMM_3::9074, NDMM_3::9075, LRMM_1::14888, LRMM_1::14889, LRMM_2::14499, LRMM_2::14500, LRMM_3::9550, LRMM_3::9551, NDMM_4::15227, NDMM_4::15228, LRMM_4::14364, LRMM_4::14365	13581, 317, -5219, 317, -5059, 317, -5059, 317, -5059, 317, -5166, 317, -5059, 317, -4963, 317, -5059	in gene, in gene, upstream, in gene, upstream, in gene, upstream, in gene, upstream, in gene, upstream, in gene, upstream, in gene, upstream, in gene, upstream	1	1	1	1	1	1	1	1	89	73.667	56	97.333	121.667	75.667	64.333	143.667	3	LRMM_4	359	Gene AK6	AD-004, TAF9, CGI-137, CINAP, CIP, AK6, hCINAP	adenylate kinase 6	NM_001015891.1, NM_016283.4		NP_001015891.1, NP_057367.1
GeneID:6880	TAF9	5	69364743	69370013	5270	-	17	NDMM_1::12561, NDMM_1::12562, NDMM_1::12563, NDMM_2::11943, NDMM_2::11944, NDMM_3::9074, NDMM_3::9075, LRMM_1::14888, LRMM_1::14889, LRMM_2::14499, LRMM_2::14500, LRMM_3::9550, LRMM_3::9551, NDMM_4::15227, NDMM_4::15228, LRMM_4::14364, LRMM_4::14365	13581, 317, -5219, 317, -5059, 317, -5059, 317, -5059, 317, -5166, 317, -5059, 317, -4963, 317, -5059	downstream, in gene, upstream, in gene, upstream, in gene, upstream, in gene, upstream, in gene, upstream, in gene, upstream, in gene, upstream, in gene, upstream	1	1	1	1	1	1	1	1	89	73.667	56	97.333	121.667	75.667	64.333	143.667	3	LRMM_4	359	Gene TAF9	AD-004, TAF9, MGC:1603, CGI-137, MGC1603, AK6, MGC:5067, MGC5067, CINAP, TAFII32, TAF2G, TAFII31, MGC:3647, CIP, TAFIID32, MGC3647, hCINAP	TATA-box binding protein associated factor 9	NM_001015892.1, NM_003187.4		NP_001015892.1, NP_003178.1
GeneID:9670	IPO13	1	43946806	43968022	21216	+	17	NDMM_1::416, NDMM_1::417, NDMM_2::415, NDMM_2::416, NDMM_3::295, NDMM_3::296, LRMM_1::513, LRMM_1::514, LRMM_1::515, LRMM_2::471, LRMM_2::472, LRMM_3::331, LRMM_3::332, NDMM_4::417, NDMM_4::418, LRMM_4::494, LRMM_4::495	-54, 27898, -54, 27866, -54, 27898, -54, 27898, 28682, -54, 28170, -86, 27930, -54, 27914, -54, 27914	upstream, downstream, upstream, downstream, upstream, downstream, upstream, downstream, downstream, upstream, downstream, upstream, downstream, upstream, downstream, upstream, downstream	1	1	1	1	1	1	1	1	65.333	63.333	45.333	69.333	136	79	55	143.667	3	LRMM_4	336	Gene IPO13	IPO13, KIAA0724, RANBP13, IMP13, KAP13, LGL2	importin 13	NM_014652.3, XM_011542461.1		NP_055467.3
GeneID:51001	MTERF3	8	96239398	96261613	22215	-	20	NDMM_1::15760, NDMM_1::15761, NDMM_1::15762, NDMM_2::14692, NDMM_2::14693, NDMM_2::14694, NDMM_3::11264, NDMM_3::11265, LRMM_1::18611, LRMM_1::18612, LRMM_1::18613, LRMM_2::17956, LRMM_2::17957, LRMM_3::11762, LRMM_3::11763, NDMM_4::18971, NDMM_4::18972, NDMM_4::18973, LRMM_4::17567, LRMM_4::17568	26125, -83, -1555, 26125, -99, -1363, 26061, -83, 26125, -83, -1363, 26125, -83, 26125, -131, 26125, -147, -1363, 26125, -83	downstream, upstream, upstream, downstream, upstream, upstream, downstream, upstream, downstream, upstream, upstream, downstream, upstream, downstream, upstream, downstream, upstream, upstream, downstream, upstream	1	1	1	1	1	1	1	1	84.667	88.333	58.667	151.667	265	79.333	65.333	143.333	3	LRMM_1	415	Gene MTERF3	FLJ10939, CGI-12, MTERF3, MTERFD1, mTERF3		NM_015942.4, NM_001286643.1, XM_005250926.3, XM_011517054.1, XM_011517055.1, XM_006716570.2		NP_057026.3, NP_001273572.1
GeneID:101930085	LOC101930085	7	35694329	35699413	5084	+	8	NDMM_1::14612, NDMM_2::13644, NDMM_3::10457, LRMM_1::17068, LRMM_2::16738, LRMM_3::10992, NDMM_4::17568, LRMM_4::16446	679, 679, 679, 679, 679, 679, 679, 679	in gene, in gene, in gene, in gene, in gene, in gene, in gene, in gene	1	1	1	1	1	1	1	1	151	75	67	131	266	115	69	143	1	LRMM_1	266	Gene LOC101930085		uncharacterized LOC101930085	XM_005276286.1, XM_011515685.1		XP_005276343.1
GeneID:3190	HNRNPK	9	83968083	83980654	12571	-	9	NDMM_1::16306, NDMM_2::15236, NDMM_2::15237, NDMM_3::11680, LRMM_1::19467, LRMM_2::18524, LRMM_3::12176, NDMM_4::19714, LRMM_4::18260	270, 206, -274, 206, 206, 462, 270, 206, 206	in gene, in gene, upstream, in gene, in gene, in gene, in gene, in gene, in gene	1	1	1	1	1	1	1	1	76	61	44	141	246	45	63	143	1	LRMM_1	246	Gene HNRNPK	CSBP, AUKS, TUNP, FLJ41122, HNRPK, HNRNPK	heterogeneous nuclear ribonucleoprotein K	NM_031263.2, NM_031262.2, NM_002140.3, XM_005251961.1, XM_005251960.2, XM_005251963.3, XM_005251964.2, XM_005251965.2, XM_011518616.1, XM_005251966.2		NP_112553.1, NP_112552.1, NP_002131.2, XP_005252018.1
GeneID:407043	MIR7-1	9	83969748	83969857	109	-	2	NDMM_2::15236, LRMM_1::19467	-10591, -10591	upstream, upstream	0	1	0	0	1	0	0	0	76	61	44	141	246	45	63	143	1	LRMM_1	246	Gene MIR7-1	mir-7-1, MIRN7-1, hsa-mir-7-1, MIR7-1	microRNA 7-1
GeneID:80010	RMI1	9	83980720	84004074	23354	+	9	NDMM_1::16306, NDMM_2::15236, NDMM_2::15237, NDMM_3::11680, LRMM_1::19467, LRMM_2::18524, LRMM_3::12176, NDMM_4::19714, LRMM_4::18260	-336, -272, 208, -272, -272, -528, -336, -272, -272	upstream, upstream, in gene, upstream, upstream, upstream, upstream, upstream, upstream	1	1	1	1	1	1	1	1	76	61	44	141	246	45	63	143	1	LRMM_1	246	Gene RMI1	C9orf76, RMI1, RP11-346I8.1, BLAP75, FLJ12888		NM_024945.2, XM_005252211.1, XM_005252213.1, XM_011519034.1		NP_079221.2, XP_005252268.1, XP_005252270.1
GeneID:134553	C5orf24	5	134845680	134859735	14055	+	8	NDMM_1::12964, NDMM_2::12279, NDMM_3::9322, LRMM_1::15301, LRMM_2::14971, LRMM_3::9804, NDMM_4::15627, LRMM_4::14765	464, 400, 304, 304, 304, 464, 400, 304	in gene, in gene, in gene, in gene, in gene, in gene, in gene, in gene	1	1	1	1	1	1	1	1	81	69	50	104	148	110	49	143	1	LRMM_1	148	Gene C5orf24	C5orf24, FLJ37562	chromosome 5 open reading frame 24	NM_152409.3, NM_001135586.1, NM_001300894.1, XM_005271889.2		NP_689622.2, NP_001129058.1, NP_001287823.1
GeneID:29080	CCDC59	12	82352304	82358805	6501	-	8	NDMM_1::3636, NDMM_2::3690, NDMM_3::2822, LRMM_1::4454, LRMM_2::4352, LRMM_3::2941, NDMM_4::4404, LRMM_4::4398	181, 165, 165, 181, 213, 165, 181, 181	in gene, in gene, in gene, in gene, in gene, in gene, in gene, in gene	1	1	1	1	1	1	1	1	69	64	59	151	152	43	36	143	1	LRMM_1	152	Gene CCDC59	HSPC128, TAP26, DKFZp686K1021, FLJ10294, BR22, CCDC59	coiled-coil domain containing 59	NM_014167.4, NR_033192.1		NP_054886.2
GeneID:79094	CHAC1	15	40953438	40956519	3081	+	8	NDMM_1::5162, NDMM_2::4765, NDMM_3::3883, LRMM_1::5937, LRMM_2::5836, LRMM_3::3967, NDMM_4::6025, LRMM_4::5922	-142, -286, -318, -206, -446, -158, -318, -318	upstream, upstream, upstream, upstream, upstream, upstream, upstream, upstream	1	1	1	1	1	1	1	1	89	69	55	91	55	65	35	143	1	LRMM_4	143	Gene CHAC1	CHAC1, MGC4504	ChaC glutathione-specific gamma-glutamylcyclotransferase 1	NM_024111.3, NM_001142776.1		NP_077016.2, NP_001136248.1
GeneID:105370789	LOC105370789	15	40962503	40974961	12458	+	8	NDMM_1::5162, NDMM_2::4765, NDMM_3::3883, LRMM_1::5937, LRMM_2::5836, LRMM_3::3967, NDMM_4::6025, LRMM_4::5922	-9207, -9351, -9383, -9271, -9511, -9223, -9383, -9383	upstream, upstream, upstream, upstream, upstream, upstream, upstream, upstream	1	1	1	1	1	1	1	1	89	69	55	91	55	65	35	143	1	LRMM_4	143	Gene LOC105370789		uncharacterized LOC105370789	XR_916261.1, XR_916262.1, XR_916263.1, XR_916264.1, XR_932164.1, XR_932165.1, XR_932166.1, XR_932167.1
GeneID:29104	N6AMT1	21	28872191	28885373	13182	-	8	NDMM_1::9904, NDMM_2::9310, NDMM_3::7189, LRMM_1::11858, LRMM_2::11134, LRMM_3::7574, NDMM_4::12042, LRMM_4::11584	109, 109, 141, 125, 141, 125, 125, 125	in gene, in gene, in gene, in gene, in gene, in gene, in gene, in gene	1	1	1	1	1	1	1	1	62	26	21	84	172	33	34	143	1	LRMM_1	172	Gene N6AMT1	N6AMT, C21orf127, MTQ2, HEMK2, MGC19995, FLJ11616, PRED28, N6AMT1	N-6 adenine-specific DNA methyltransferase 1 (putative)	NM_013240.5, NM_182749.4, NR_047510.2		NP_037372.4, NP_877426.4
GeneID:79713	IGFLR1	19	35739250	35742450	3200	-	23	NDMM_1::7772, NDMM_1::7773, NDMM_1::7774, NDMM_1::7775, NDMM_2::7178, NDMM_2::7179, NDMM_2::7180, NDMM_3::5648, NDMM_3::5649, LRMM_1::9077, LRMM_1::9078, LRMM_1::9079, LRMM_2::8678, LRMM_2::8679, LRMM_2::8680, LRMM_3::5851, LRMM_3::5852, NDMM_4::9227, NDMM_4::9228, NDMM_4::9229, LRMM_4::9076, LRMM_4::9077, LRMM_4::9078	1682, -2414, -2958, -5966, 1682, -2766, -5934, 1682, -2942, 1682, -2958, -5998, 1714, -2798, -5966, 1682, -2958, 1650, -2990, -5966, 1618, -2990, -5934	in gene, upstream, upstream, upstream, in gene, upstream, upstream, in gene, upstream, in gene, upstream, upstream, in gene, upstream, upstream, in gene, upstream, in gene, upstream, upstream, in gene, upstream, upstream	1	1	1	1	1	1	1	1	81.333	55.667	31.667	81.667	105	40.333	31.333	143	3	LRMM_4	171	Gene IGFLR1	TMEM149, U2AF1L4, FLJ22573, IGFLR1	IGF like family receptor 1	NM_024660.2		NP_078936.1
GeneID:199746	U2AF1L4	19	35742527	35745442	2915	-	23	NDMM_1::7772, NDMM_1::7773, NDMM_1::7774, NDMM_1::7775, NDMM_2::7178, NDMM_2::7179, NDMM_2::7180, NDMM_3::5648, NDMM_3::5649, LRMM_1::9077, LRMM_1::9078, LRMM_1::9079, LRMM_2::8678, LRMM_2::8679, LRMM_2::8680, LRMM_3::5851, LRMM_3::5852, NDMM_4::9227, NDMM_4::9228, NDMM_4::9229, LRMM_4::9076, LRMM_4::9077, LRMM_4::9078	4674, 578, 34, -2974, 4674, 226, -2942, 4674, 50, 4674, 34, -3006, 4706, 194, -2974, 4674, 34, 4642, 2, -2974, 4610, 2, -2942	downstream, in gene, in gene, upstream, downstream, in gene, upstream, downstream, in gene, downstream, in gene, upstream, downstream, in gene, upstream, downstream, in gene, downstream, in gene, upstream, downstream, in gene, upstream	1	1	1	1	1	1	1	1	81.333	55.667	31.667	81.667	105	40.333	31.333	143	3	LRMM_4	171	Gene U2AF1L4	U2AF1-RS3, U2AF1L4, U2AF1L3V1, U2AF1L3, U2af26, U2AF1RS3, FLJ35525, MGC33901	U2 small nuclear RNA auxiliary factor 1-like 4	NM_001040425.2, NM_144987.3, NR_110171.1, NR_110172.1, NR_110173.1		NP_001035515.1, NP_659424.2
GeneID:55851	PSENEN	19	35745577	35747155	1578	+	23	NDMM_1::7772, NDMM_1::7773, NDMM_1::7774, NDMM_1::7775, NDMM_2::7178, NDMM_2::7179, NDMM_2::7180, NDMM_3::5648, NDMM_3::5649, LRMM_1::9077, LRMM_1::9078, LRMM_1::9079, LRMM_2::8678, LRMM_2::8679, LRMM_2::8680, LRMM_3::5851, LRMM_3::5852, NDMM_4::9227, NDMM_4::9228, NDMM_4::9229, LRMM_4::9076, LRMM_4::9077, LRMM_4::9078	-4809, -713, -169, 2839, -4809, -361, 2807, -4809, -185, -4809, -169, 2871, -4841, -329, 2839, -4809, -169, -4777, -137, 2839, -4745, -137, 2807	upstream, upstream, upstream, downstream, upstream, upstream, downstream, upstream, upstream, upstream, upstream, downstream, upstream, upstream, downstream, upstream, upstream, upstream, upstream, downstream, upstream, upstream, downstream	1	1	1	1	1	1	1	1	81.333	55.667	31.667	81.667	105	40.333	31.333	143	3	LRMM_4	171	Gene PSENEN	PEN-2, MSTP064, PSENEN, MDS033, PEN2	presenilin enhancer gamma secretase subunit	NM_172341.2, NM_001281532.1		NP_758844.1, NP_001268461.1
GeneID:55260	TMEM143	19	48332356	48364237	31881	-	19	NDMM_1::7996, NDMM_1::7997, NDMM_1::7998, NDMM_2::7378, NDMM_2::7379, NDMM_3::5775, LRMM_1::9318, LRMM_1::9319, LRMM_2::8886, LRMM_2::8887, LRMM_3::6014, LRMM_3::6015, NDMM_4::9488, NDMM_4::9489, NDMM_4::9490, LRMM_4::9363, LRMM_4::9364, LRMM_4::9365, LRMM_4::9366	31213, 941, 141, 31213, 141, 141, 31021, 141, 31181, 77, 31213, -51, 31181, 30093, 141, 33965, 31181, 30093, 77	in gene, in gene, in gene, in gene, in gene, in gene, in gene, in gene, in gene, in gene, in gene, upstream, in gene, in gene, in gene, downstream, in gene, in gene, in gene	1	1	1	1	1	1	1	1	66.333	36.333	26	88	83	44	27	143	3	LRMM_4	174	Gene TMEM143	TMEM143, FLJ10922	transmembrane protein 143	NM_001303540.1, NM_001303539.1, NM_018273.3, NM_001303538.1, NR_130317.1		NP_001290469.1, NP_001290468.1, NP_060743.2, NP_001290467.1
GeneID:105373835	LOC105373835	2	200963490	201016352	52862	+	9	NDMM_1::9209, NDMM_2::8586, NDMM_3::6690, LRMM_1::10829, LRMM_2::10290, LRMM_3::6999, NDMM_4::11108, LRMM_4::10785, NDMM_2::8587	30, 158, 30, 30, 158, 94, 30, 78, 58590	in gene, in gene, in gene, in gene, in gene, in gene, in gene, in gene, downstream	1	1	1	1	1	1	1	1	33	36	30	62	92.5	49.5	25	143	2	LRMM_1	179	Gene LOC105373835		uncharacterized LOC105373835	XR_933257.1, XR_933258.1, XR_923783.1, XR_923784.1
GeneID:80153	EDC3	15	74630558	74696045	65487	-	15	NDMM_1::5547, NDMM_1::5548, NDMM_2::5049, NDMM_2::5050, NDMM_3::4094, LRMM_1::6254, LRMM_1::6255, LRMM_2::6126, LRMM_3::4180, NDMM_4::6341, NDMM_4::6342, LRMM_4::6270, LRMM_4::6271, LRMM_4::6272, LRMM_4::6273	68589, 77, 68557, 77, 68589, 68429, 173, 68589, 68677, 68781, 60653, 74829, 68589, 60685, 77	downstream, in gene, downstream, in gene, downstream, downstream, in gene, downstream, downstream, downstream, in gene, downstream, downstream, in gene, in gene	1	1	1	1	1	1	1	1	59	42.25	23.25	58.75	52	32.25	19.75	143	4	LRMM_4	371	Gene EDC3	FLJ31777, FLJ21128, YJEFN2, YJDC, MRT50, LSM16, EDC3		NM_025083.3, NM_001142443.1, NM_001142444.1, XM_011522091.1, XM_011522092.1		NP_079359.2, NP_001135915.1, NP_001135916.1
GeneID:26832	RNU5B-1	15	65304677	65304793	116	+	19	NDMM_1::5437, NDMM_1::5438, NDMM_2::4966, NDMM_2::4967, NDMM_2::4968, NDMM_3::4038, NDMM_3::4039, LRMM_1::6158, LRMM_1::6159, LRMM_2::6049, LRMM_2::6050, LRMM_3::4113, LRMM_3::4114, NDMM_4::6255, NDMM_4::6256, NDMM_4::6257, NDMM_4::6258, LRMM_4::6173, LRMM_4::6174	-8837, -101, -8709, -101, 411, -8709, -101, -8709, -101, -8837, -197, -8709, -133, -8837, -4053, -197, 347, -8837, -101	upstream, upstream, upstream, upstream, downstream, upstream, upstream, upstream, upstream, upstream, upstream, upstream, upstream, upstream, upstream, upstream, downstream, upstream, upstream	1	1	1	1	1	1	1	1	111	57	45.667	68.667	162	72	61	142.667	3	LRMM_1	240	Gene RNU5B-1	RNU5B, U5B1, RNU5B-1, RNU5B-1P	RNA, U5B small nuclear 1	NR_002757.3
GeneID:2901	GRIK5	19	41998316	42071804	73488	-	9	NDMM_1::7888, NDMM_1::7889, NDMM_2::7282, NDMM_3::5712, LRMM_1::9208, LRMM_2::8792, LRMM_3::5933, NDMM_4::9361, LRMM_4::9215	-3460, -4260, -4132, -4260, -4228, -4260, -4228, -4164, -4228	upstream, upstream, upstream, upstream, upstream, upstream, upstream, upstream, upstream	1	1	1	1	1	1	1	1	66	55.5	43	109	80	53.5	51.5	142.5	2	LRMM_4	260	Gene GRIK5	GRIK5, EAA2, KA2, GluK5, GRIK2	glutamate ionotropic receptor kainate type subunit 5	NM_002088.4, NM_001301030.1, XM_011526862.1, XM_011526863.1, XM_005258821.2, XM_011526864.1, XM_011526865.1, XM_011526866.1, XM_011526867.1, XM_011526868.1, XM_011526869.1, XM_011526870.1, XR_935810.1, XM_011526871.1		NP_002079.3, NP_001287959.1
GeneID:10488	CREB3	9	35732320	35737008	4688	+	10	NDMM_1::16192, NDMM_1::16193, NDMM_2::15126, NDMM_3::11599, LRMM_1::19307, LRMM_2::18415, LRMM_3::12091, NDMM_4::19567, LRMM_4::18130, LRMM_4::18131	64, 736, 96, 160, 32, 32, 32, 48, 32, 3936	in gene, in gene, in gene, in gene, in gene, in gene, in gene, in gene, in gene, in gene	1	1	1	1	1	1	1	1	48	31	26.5	61	68.5	26	40	142.5	2	LRMM_4	222	Gene CREB3	CREB3, LZIP, MGC19782, LUMAN, sLZIP, MGC15333	cAMP responsive element binding protein 3	NM_006368.4		NP_006359.3
GeneID:102466201	MIR6853	9	35732922	35732995	73	+	10	NDMM_1::16192, NDMM_1::16193, NDMM_2::15126, NDMM_3::11599, LRMM_1::19307, LRMM_2::18415, LRMM_3::12091, NDMM_4::19567, LRMM_4::18130, LRMM_4::18131	-538, 134, -506, -442, -570, -570, -570, -554, -570, 3334	upstream, downstream, upstream, upstream, upstream, upstream, upstream, upstream, upstream, downstream	1	1	1	1	1	1	1	1	48	31	26.5	61	68.5	26	40	142.5	2	LRMM_4	222	Gene MIR6853	hsa-mir-6853, MIR6853	microRNA 6853
GeneID:51315	KRCC1	2	88027203	88055801	28598	-	14	NDMM_1::8704, NDMM_1::8705, NDMM_2::8089, NDMM_2::8090, NDMM_3::6278, NDMM_3::6279, LRMM_1::10155, LRMM_1::10156, LRMM_2::9656, LRMM_3::6572, NDMM_4::10375, NDMM_4::10376, LRMM_4::10200, LRMM_4::10201	38905, 89, 38905, 153, 39129, 121, 39033, 89, 57, 105, 38905, 89, 38889, 89	downstream, in gene, downstream, in gene, downstream, in gene, downstream, in gene, in gene, in gene, downstream, in gene, downstream, in gene	1	1	1	1	1	1	1	1	83	84.5	46.5	113.5	264.5	37	17	142.5	2	LRMM_1	430	Gene KRCC1	CHBP2, FLJ22333, KRCC1	lysine-rich coiled-coil 1	NM_016618.2, NM_001304526.1		NP_057702.1, NP_001291455.1
GeneID:100128055	SMARCA5-AS1	4	143513472	143514837	1365	-	8	NDMM_1::12107, NDMM_2::11524, NDMM_3::8796, LRMM_1::14424, LRMM_2::13912, LRMM_3::9258, NDMM_4::14698, LRMM_4::13905	1333, 1269, 1365, 1317, 1333, 1301, 1333, 1077	in gene, in gene, in gene, in gene, in gene, in gene, in gene, in gene	1	1	1	1	1	1	1	1	85	89	45	135	170	154	74	142	1	LRMM_1	170	Gene SMARCA5-AS1	SMARCA5-AS1	SMARCA5 antisense RNA 1	NR_104027.1
GeneID:9731	CEP104	1	3812081	3857387	45306	-	8	NDMM_1::45, NDMM_2::39, NDMM_3::31, LRMM_1::51, LRMM_2::46, LRMM_3::31, NDMM_4::47, LRMM_4::49	203, 11, 203, 203, 107, 203, 43, 203	in gene, in gene, in gene, in gene, in gene, in gene, in gene, in gene	1	1	1	1	1	1	1	1	68	67	56	52	119	76	65	142	1	LRMM_4	142	Gene CEP104	CEP104, KIAA0562, CFAP256, GlyBP, ROC22, JBTS25	centrosomal protein 104kDa	NM_014704.3, XM_011542473.1, XM_005244815.3, XM_011542474.1, XM_011542475.1, XM_011542476.1, XM_011542477.1, XM_011542478.1		NP_055519.1
GeneID:1677	DFFB	1	3857143	3885429	28286	+	8	NDMM_1::45, NDMM_2::39, NDMM_3::31, LRMM_1::51, LRMM_2::46, LRMM_3::31, NDMM_4::47, LRMM_4::49	41, 233, 41, 41, 137, 41, 201, 41	in gene, in gene, in gene, in gene, in gene, in gene, in gene, in gene	1	1	1	1	1	1	1	1	68	67	56	52	119	76	65	142	1	LRMM_4	142	Gene DFFB	DFF-40, DFF40, DFF2, DFFB, CAD, CPAN		NM_004402.3, NM_001282669.1, NR_104222.1, XR_946563.1, XM_011540863.1, XM_011540864.1, XR_946564.1, XR_946565.1, XM_011540865.1		NP_004393.1, NP_001269598.1
GeneID:54464	XRN1	3	142306607	142448062	141455	-	9	NDMM_1::11239, NDMM_2::10636, NDMM_3::8151, NDMM_3::8152, LRMM_1::13464, LRMM_2::12620, LRMM_3::8572, NDMM_4::13630, LRMM_4::12988	94, 126, 814, 126, 126, 94, 126, 126, 126	in gene, in gene, in gene, in gene, in gene, in gene, in gene, in gene, in gene	1	1	1	1	1	1	1	1	105	66	55	82	251	54	65	142	1	LRMM_1	251	Gene XRN1	DKFZp686B22225, DKFZp434P0721, XRN1, SEP1, FLJ41903, DKFZp686F19113	5'-3' exoribonuclease 1	NM_019001.4, NM_001282857.1, NM_001282859.1, XM_011512919.1, XM_011512920.1, XM_011512921.1, XM_011512922.1, XM_011512923.1, XM_006713673.2		NP_061874.3, NP_001269786.1, NP_001269788.1
GeneID:64924	SLC30A5	5	69093949	69131072	37123	+	8	NDMM_1::12556, NDMM_2::11937, NDMM_3::9069, LRMM_1::14881, LRMM_2::14493, LRMM_3::9545, NDMM_4::15222, LRMM_4::14357	291, 99, 3, 99, 163, 99, 3, 3	in gene, in gene, in gene, in gene, in gene, in gene, in gene, in gene	1	1	1	1	1	1	1	1	66	57	45	76	147	76	47	142	1	LRMM_1	147	Gene SLC30A5	SLC30A5, MGC5499, ZnT-5, ZTL1, FLJ12496, FLJ12756, ZNT5, ZNTL1		NM_001251969.1, NM_022902.4, NM_024055.4, XM_005248569.2, XM_006714672.2		NP_001238898.1, NP_075053.2, NP_076960.1
GeneID:6208	RPS14	5	150444229	150449756	5527	-	12	NDMM_1::13091, NDMM_1::13092, NDMM_2::12396, NDMM_2::12397, NDMM_3::9410, LRMM_1::15453, LRMM_2::15114, LRMM_3::9888, NDMM_4::15761, NDMM_4::15762, LRMM_4::14918, LRMM_4::14919	13404, -132, 444, -164, -132, -164, -100, 124, 13436, -164, 13436, -132	downstream, upstream, in gene, upstream, upstream, upstream, upstream, in gene, downstream, upstream, downstream, upstream	1	1	1	1	1	1	1	1	61.5	44	28.5	59.5	73	37	14.5	142	2	LRMM_4	248	Gene RPS14	S14, RPS14, EMTB	ribosomal protein S14	NM_005617.3, NM_001025070.1, NM_001025071.1		NP_005608.1, NP_001020241.1, NP_001020242.1
GeneID:60386	SLC25A19	17	75272980	75289957	16977	-	31	NDMM_1::6937, NDMM_1::6938, NDMM_2::6398, NDMM_2::6399, NDMM_2::6400, NDMM_2::6401, NDMM_2::6402, NDMM_3::5143, NDMM_3::5144, NDMM_3::5145, NDMM_3::5146, LRMM_1::8014, LRMM_1::8015, LRMM_1::8016, LRMM_1::8017, LRMM_2::7783, LRMM_2::7784, LRMM_2::7785, LRMM_2::7786, LRMM_3::5256, LRMM_3::5257, LRMM_3::5258, NDMM_4::8114, NDMM_4::8115, NDMM_4::8116, LRMM_4::8055, LRMM_4::8056, LRMM_4::8057, LRMM_4:…	613, -6043, 19781, 18437, 581, -6043, -7771, 19141, 549, -6011, -7803, 19141, 613, -6091, -7995, 19381, 581, -5979, -7931, 19141, 581, -6059, 18565, 549, -6075, 19013, 18533, 17477, 613, -6043, -8155	in gene, upstream, downstream, downstream, in gene, upstream, upstream, downstream, in gene, upstream, upstream, downstream, in gene, upstream, upstream, downstream, in gene, upstream, upstream, downstream, in gene, upstream, downstream, in gene, upstream, downstream, downstream, downstream, in gene, upstream, upstream	1	1	1	1	1	1	1	1	41.333	45.833	39.667	63.167	77.333	55.667	30.333	141.833	6	LRMM_4	337	Gene SLC25A19	DNC, THMD4, TPC, SLC25A19, MUP1, THMD3, MCPHA	solute carrier family 25 member 19	NM_021734.4, NM_001126121.1, NM_001126122.1, XM_005257560.1, XM_005257562.1, XM_006722007.1, XM_005257559.2, XM_005257561.2, XM_011525098.1		NP_068380.3, NP_001119593.1, NP_001119594.1, XP_005257617.1, XP_005257619.1, XP_006722070.1
GeneID:9538	EI24	11	125569216	125584689	15473	+	16	NDMM_1::3147, NDMM_1::3148, NDMM_2::3075, NDMM_2::3076, NDMM_3::2386, NDMM_3::2387, LRMM_1::3858, LRMM_1::3859, LRMM_2::3695, LRMM_2::3696, LRMM_3::2496, LRMM_3::2497, NDMM_4::3645, NDMM_4::3646, LRMM_4::3733, LRMM_4::3734	416, 23424, 416, 23392, 320, 23424, 416, 23232, 304, 23456, 416, 23440, 224, 23424, 416, 23456	in gene, downstream, in gene, downstream, in gene, downstream, in gene, downstream, in gene, downstream, in gene, downstream, in gene, downstream, in gene, downstream	1	1	1	1	1	1	1	1	72	59	45	102.5	117.5	63	48	141.5	2	LRMM_4	192	Gene EI24	PIG8, EPG4, TP53I8, EI24	EI24, autophagy associated transmembrane protein	NM_001290135.1, NM_004879.4, NR_110769.1, NR_110770.1, XM_011543069.1, XM_011543070.1		NP_001277064.1, NP_004870.3
GeneID:105369550	LOC105369550	11	125570198	125592635	22437	-	16	NDMM_1::3147, NDMM_1::3148, NDMM_2::3075, NDMM_2::3076, NDMM_3::2386, NDMM_3::2387, LRMM_1::3858, LRMM_1::3859, LRMM_2::3695, LRMM_2::3696, LRMM_3::2496, LRMM_3::2497, NDMM_4::3645, NDMM_4::3646, LRMM_4::3733, LRMM_4::3734	23003, -5, 23003, 27, 23099, -5, 23003, 187, 23115, -37, 23003, -21, 23195, -5, 23003, -37	downstream, upstream, downstream, in gene, downstream, upstream, downstream, in gene, downstream, upstream, downstream, upstream, downstream, upstream, downstream, upstream	1	1	1	1	1	1	1	1	72	59	45	102.5	117.5	63	48	141.5	2	LRMM_4	192	Gene LOC105369550	STT3A-AS1	STT3A antisense RNA 1	XR_913655.1, XR_913656.1, XR_948139.1
GeneID:51321	AMZ2	17	68205997	68257164	51167	+	35	NDMM_1::6903, NDMM_1::6904, NDMM_1::6905, NDMM_1::6906, NDMM_1::6907, NDMM_2::6366, NDMM_2::6367, NDMM_2::6368, NDMM_3::5121, NDMM_3::5122, NDMM_3::5123, LRMM_1::7963, LRMM_1::7964, LRMM_1::7965, LRMM_1::7966, LRMM_1::7967, LRMM_2::7748, LRMM_2::7749, LRMM_2::7750, LRMM_2::7751, LRMM_2::7752, LRMM_3::5238, LRMM_3::5239, LRMM_3::5240, NDMM_4::8067, NDMM_4::8068, NDMM_4::8069, NDMM_4::8070, NDMM_4:…	-493, 51, 31539, 41939, 53075, 31571, 41779, 53086, 31582, 41939, 53059, -461, 31635, 33299, 41811, 53139, -461, 147, 31651, 42051, 53075, 31635, 41939, 53075, -397, 31763, 41843, 53267, 57491, -5101, -461, 31827, 41779, 53139, 57363	upstream, in gene, in gene, in gene, downstream, in gene, in gene, downstream, in gene, in gene, downstream, upstream, in gene, in gene, in gene, downstream, upstream, in gene, in gene, in gene, downstream, in gene, in gene, downstream, upstream, in gene, in gene, downstream, downstream, upstream, upstream, in gene, in gene, downstream, downstream	1	1	1	1	1	1	1	1	41.25	30.5	23.875	59.375	82	42.125	29	141.25	8	LRMM_4	383	Gene AMZ2	AMZ2		NM_016627.4, NM_001033569.1, NM_001033570.1, NM_001033571.1, NM_001033572.1, NM_001033574.1, NM_001289054.1, NM_001289056.1, XM_005257432.3, XM_005257433.3, XM_005257435.3, XM_005257436.2, XM_005257437.2, XM_006721940.2, XM_005257438.3		NP_057711.3, NP_001028741.1, NP_001028742.1, NP_001028743.1, NP_001028744.1, NP_001028746.1, NP_001275983.1, NP_001275985.1
GeneID:9276	COPB2	3	139357587	139389680	32093	-	8	NDMM_1::11205, NDMM_2::10608, NDMM_3::8133, LRMM_1::13425, LRMM_2::12591, LRMM_3::8553, NDMM_4::13597, LRMM_4::12951	80, 240, 80, -112, -304, 80, -112, -112	in gene, in gene, in gene, upstream, upstream, in gene, upstream, upstream	1	1	1	1	1	1	1	1	112	89	65	118	227	112	90	141	1	LRMM_1	227	Gene COPB2	beta'-COP, COPB2	coatomer protein complex subunit beta 2 (beta prime)	NM_004766.2, NR_023350.1, XM_011513317.1		NP_004757.1
GeneID:4780	NFE2L2	2	177230303	177265131	34828	-	14	NDMM_1::9092, NDMM_1::9093, NDMM_2::8464, NDMM_2::8465, NDMM_3::6585, NDMM_3::6586, LRMM_1::10686, LRMM_2::10126, LRMM_3::6875, LRMM_3::6876, NDMM_4::10913, NDMM_4::10914, LRMM_4::10643, LRMM_4::10644	1227, 555, 1195, 235, 1259, -245, 555, 203, 1227, -213, 1419, 203, 1387, 395	in gene, in gene, in gene, in gene, in gene, upstream, in gene, in gene, in gene, upstream, in gene, in gene, in gene, in gene	1	1	1	1	1	1	1	1	78	80	64	109	199	87	85	141	1	LRMM_1	199	Gene NFE2L2	NRF2, NFE2L2	nuclear factor, erythroid 2 like 2	NM_001145412.2, NM_001145413.2, NM_006164.4		NP_001138884.1, NP_001138885.1, NP_006155.2
GeneID:100422824	MIR3128	2	177255945	177256010	65	-	14	NDMM_1::9092, NDMM_1::9093, NDMM_2::8464, NDMM_2::8465, NDMM_3::6585, NDMM_3::6586, LRMM_1::10686, LRMM_2::10126, LRMM_3::6875, LRMM_3::6876, NDMM_4::10913, NDMM_4::10914, LRMM_4::10643, LRMM_4::10644	-7894, -8566, -7926, -8886, -7862, -9366, -8566, -8918, -7894, -9334, -7702, -8918, -7734, -8726	upstream, upstream, upstream, upstream, upstream, upstream, upstream, upstream, upstream, upstream, upstream, upstream, upstream, upstream	1	1	1	1	1	1	1	1	78	80	64	109	199	87	85	141	1	LRMM_1	199	Gene MIR3128	MIR3128, mir-3128	microRNA 3128
GeneID:102724146	LOC102724146	12	15817069	15882348	65279	-	8	NDMM_1::3280, NDMM_2::3273, NDMM_3::2515, LRMM_1::4054, LRMM_2::3906, LRMM_3::2622, NDMM_4::3890, LRMM_4::3953	204, 140, 204, 268, 268, 76, 140, 140	in gene, in gene, in gene, in gene, in gene, in gene, in gene, in gene	1	1	1	1	1	1	1	1	57	124	89	139	188	99	74	141	1	LRMM_1	188	Gene LOC102724146		uncharacterized LOC102724146	XR_913886.1, XR_432792.2, XR_913887.1, XR_913888.1, XR_931391.1, XR_429048.2, XR_931392.1, XR_931393.1
GeneID:3587	IL10RA	11	117986391	118001483	15092	+	14	NDMM_1::3078, NDMM_1::3079, NDMM_2::3012, NDMM_2::3013, NDMM_3::2348, NDMM_3::2349, LRMM_1::3799, LRMM_2::3642, LRMM_3::2452, LRMM_3::2453, NDMM_4::3587, NDMM_4::3588, LRMM_4::3662, LRMM_4::3663	9, 24505, -151, 24649, -151, 24649, -151, -167, -151, 24649, -247, 24649, -151, 24649	in gene, downstream, upstream, downstream, upstream, downstream, upstream, upstream, upstream, downstream, upstream, downstream, upstream, downstream	1	1	1	1	1	1	1	1	37.5	38	38.5	37.5	11	20.5	63.5	141	2	LRMM_4	181	Gene IL10RA	CD210, HIL-10R, IL-10R1, CD210a, IL10RA, IL10R, CDW210A	interleukin 10 receptor subunit alpha	NR_026691.1, NM_001558.3		NP_001549.2
GeneID:90701	SEC11C	18	59139884	59158837	18953	+	9	NDMM_1::7265, NDMM_1::7266, NDMM_2::6747, NDMM_3::5381, LRMM_1::8456, LRMM_2::8182, LRMM_3::5524, NDMM_4::8536, LRMM_4::8468	-300, 9172, -300, -300, -300, -236, -300, -268, -300	upstream, in gene, upstream, upstream, upstream, upstream, upstream, upstream, upstream	1	1	1	1	1	1	1	1	79	67.5	47	126.5	138	61.5	62	141	2	LRMM_4	273	Gene SEC11C	SEC11C, SPCS4C, SPC21, SEC11L3	SEC11 homolog C, signal peptidase complex subunit	NM_033280.2, XM_011526260.1, XM_005266779.2		NP_150596.1
GeneID:22872	SEC31A	4	82818661	82891280	72619	-	16	NDMM_1::11900, NDMM_1::11901, NDMM_2::11269, NDMM_2::11270, NDMM_3::8611, NDMM_3::8612, LRMM_1::14175, LRMM_1::14176, LRMM_2::13513, LRMM_2::13514, LRMM_3::9077, LRMM_3::9078, NDMM_4::14395, NDMM_4::14396, LRMM_4::13686, LRMM_4::13687	240, -9456, 304, -9552, -208, -9616, 144, -9520, -48, -9456, 208, -9424, 208, -9552, 240, -9584	in gene, upstream, in gene, upstream, upstream, upstream, in gene, upstream, upstream, upstream, in gene, upstream, in gene, upstream, in gene, upstream	1	1	1	1	1	1	1	1	73	81.5	56	112.5	126.5	99	61.5	141	2	LRMM_4	183	Gene SEC31A	ABP125, KIAA0905, SEC31L1, HSPC275, HSPC334, MGC90305, SEC31A, DKFZp686N07171, ABP130	SEC31 homolog A, COPII coat complex component	NM_001077206.2, NM_001077208.2, NM_001077207.2, NM_014933.3, NM_001191049.1, NM_016211.3, XM_005262850.1, NM_001300744.1, NM_001300745.1, XM_011531746.1, XM_011531747.1, XM_011531748.1, XM_011531749.1		NP_001070674.1, NP_001070676.1, NP_001070675.1, NP_055748.2, NP_001177978.1, NP_057295.2, XP_005262907.1, NP_001287673.1, NP_001287674.1
GeneID:100499177	THAP9-AS1	4	82893452	82900916	7464	-	16	NDMM_1::11900, NDMM_1::11901, NDMM_2::11269, NDMM_2::11270, NDMM_3::8611, NDMM_3::8612, LRMM_1::14175, LRMM_1::14176, LRMM_2::13513, LRMM_2::13514, LRMM_3::9077, LRMM_3::9078, NDMM_4::14395, NDMM_4::14396, LRMM_4::13686, LRMM_4::13687	9876, 180, 9940, 84, 9428, 20, 9780, 116, 9588, 180, 9844, 212, 9844, 84, 9876, 52	downstream, in gene, downstream, in gene, downstream, in gene, downstream, in gene, downstream, in gene, downstream, in gene, downstream, in gene, downstream, in gene	1	1	1	1	1	1	1	1	73	81.5	56	112.5	126.5	99	61.5	141	2	LRMM_4	183	Gene THAP9-AS1	FLJ46752, THAP9-AS1, RP11-163O17.1, FLJ46167	THAP9 antisense RNA 1	NR_034075.1, NR_034076.1, NR_034077.1
GeneID:79725	THAP9	4	82900684	82920283	19599	+	16	NDMM_1::11900, NDMM_1::11901, NDMM_2::11269, NDMM_2::11270, NDMM_3::8611, NDMM_3::8612, LRMM_1::14175, LRMM_1::14176, LRMM_2::13513, LRMM_2::13514, LRMM_3::9077, LRMM_3::9078, NDMM_4::14395, NDMM_4::14396, LRMM_4::13686, LRMM_4::13687	-9644, 52, -9708, 148, -9196, 212, -9548, 116, -9356, 52, -9612, 20, -9612, 148, -9644, 180	upstream, in gene, upstream, in gene, upstream, in gene, upstream, in gene, upstream, in gene, upstream, in gene, upstream, in gene, upstream, in gene	1	1	1	1	1	1	1	1	73	81.5	56	112.5	126.5	99	61.5	141	2	LRMM_4	183	Gene THAP9	THAP9, FLJ34093, FLJ23320, hTh9	THAP domain containing 9	NM_024672.4, XM_011532245.1, XM_005263220.2, XM_011532246.1		NP_078948.3
GeneID:100506571	LOC100506571	1	228073909	228078006	4097	-	10	NDMM_1::1451, NDMM_2::1482, NDMM_3::1149, LRMM_1::1944, LRMM_1::1945, LRMM_2::1847, LRMM_3::1331, NDMM_4::1691, LRMM_4::1914, LRMM_4::1915	-4746, -4746, -4586, 6006, -4746, -4714, -4650, -4730, 5702, -4746	upstream, upstream, upstream, downstream, upstream, upstream, upstream, upstream, downstream, upstream	1	1	1	1	1	1	1	1	54.5	69.5	27.5	103	223.5	31.5	61	141	2	LRMM_1	422	Gene LOC100506571		uncharacterized LOC100506571	XM_003960276.3, XM_003119160.3
GeneID:23137	SMC5	9	70258962	70354873	95911	+	8	NDMM_1::16263, NDMM_2::15192, NDMM_3::11651, LRMM_1::19407, LRMM_2::18480, LRMM_3::12143, NDMM_4::19666, LRMM_4::18216	-242, -402, -210, -146, -210, -146, -210, -210	upstream, upstream, upstream, upstream, upstream, upstream, upstream, upstream	1	1	1	1	1	1	1	1	83	65	68	87	241	89	55	141	1	LRMM_1	241	Gene SMC5	SMC5L1, SMC5, KIAA0594	structural maintenance of chromosomes 5	NM_015110.3, XM_005251837.1, XM_005251838.1, XM_005251839.1		NP_055925.2, XP_005251894.1, XP_005251895.1, XP_005251896.1
GeneID:100507299	SMC5-AS1	9	70216059	70258874	42815	-	9	NDMM_1::16263, NDMM_2::15192, NDMM_3::11651, LRMM_1::19406, LRMM_1::19407, LRMM_2::18480, LRMM_3::12143, NDMM_4::19666, LRMM_4::18216	154, 314, 122, 24463, 58, 122, 58, 122, 122	in gene, in gene, in gene, in gene, in gene, in gene, in gene, in gene, in gene	1	1	1	1	1	1	1	1	42.5	33.5	37	46	133	89	55	141	2	LRMM_1	241	Gene SMC5-AS1	DKFZp686I1668, SMC5-AS1, MAMDC2-AS2	SMC5 antisense RNA 1 (head to head)	NR_039990.1
GeneID:55572	FOXRED1	11	126269040	126278132	9092	+	16	NDMM_1::3154, NDMM_1::3155, NDMM_2::3083, NDMM_2::3084, NDMM_3::2392, NDMM_3::2393, LRMM_1::3865, LRMM_1::3866, LRMM_2::3703, LRMM_2::3704, LRMM_3::2503, LRMM_3::2504, NDMM_4::3653, NDMM_4::3654, LRMM_4::3738, LRMM_4::3739	16, 14064, 16, 14171, 16, 13968, 16, 14320, 16, 14048, 112, 14032, 16, 14096, -80, 14256	in gene, downstream, in gene, downstream, in gene, downstream, in gene, downstream, in gene, downstream, in gene, downstream, in gene, downstream, upstream, downstream	1	1	1	1	1	1	1	1	82.5	64	48.5	83.5	119.5	65.5	51	141	2	LRMM_4	214	Gene FOXRED1	H17, FOXRED1, FP634	FAD-dependent oxidoreductase domain containing 1	NM_017547.3, NR_037647.1, NR_037648.1, XM_011542895.1, XM_011542896.1, XM_006718879.2, XM_006718880.2, XM_006718881.2		NP_060017.1
GeneID:91614	DEPDC7	11	33015864	33033582	17718	+	8	NDMM_1::2450, NDMM_2::2482, NDMM_3::1947, LRMM_1::3092, LRMM_2::3042, LRMM_3::2035, NDMM_4::2938, LRMM_4::3004	23560, 23656, 23656, 23528, 23656, 23528, 23560, 23560	downstream, downstream, downstream, downstream, downstream, downstream, downstream, downstream	1	1	1	1	1	1	1	1	58	63	32	79	80	58	42	141	1	LRMM_4	141	Gene DEPDC7	DEPDC7, TR2, dJ85M6.4	DEP domain containing 7	NM_001077242.1, NM_139160.2		NP_001070710.1, NP_631899.2
GeneID:55346	TCP11L1	11	33039417	33079454	40037	+	8	NDMM_1::2450, NDMM_2::2482, NDMM_3::1947, LRMM_1::3092, LRMM_2::3042, LRMM_3::2035, NDMM_4::2938, LRMM_4::3004	7, 103, 103, -25, 103, -25, 7, 7	in gene, in gene, in gene, upstream, in gene, upstream, in gene, in gene	1	1	1	1	1	1	1	1	58	63	32	79	80	58	42	141	1	LRMM_4	141	Gene TCP11L1	dJ85M6.3, FLJ11336, FLJ11386, TCP11L1	t-complex 11 like 1	NM_001145541.1, NM_018393.3, XR_930876.1, XM_011520204.1, XM_011520205.1, XM_011520206.1, XM_011520207.1, XM_011520208.1		NP_001139013.1, NP_060863.3
GeneID:54938	SARS2	19	38915264	38930896	15632	-	8	NDMM_1::7817, NDMM_2::7221, NDMM_3::5666, LRMM_1::9138, LRMM_2::8727, LRMM_3::5880, NDMM_4::9287, LRMM_4::9128	272, 240, 208, 240, 240, 224, 272, 272	in gene, in gene, in gene, in gene, in gene, in gene, in gene, in gene	1	1	1	1	1	1	1	1	88	57	29	96	109	49	29	141	1	LRMM_4	141	Gene SARS2	SARSM, SARS, mtSerRS, SerRSmt, SERS, FLJ20450, SYS, SARS2, SerRS	seryl-tRNA synthetase 2, mitochondrial	NM_001145901.1, NM_017827.3		NP_001139373.1, NP_060297.1
GeneID:6183	MRPS12	19	38930708	38933020	2312	+	8	NDMM_1::7817, NDMM_2::7221, NDMM_3::5666, LRMM_1::9138, LRMM_2::8727, LRMM_3::5880, NDMM_4::9287, LRMM_4::9128	-84, -52, -20, -52, -52, -36, -84, -84	upstream, upstream, upstream, upstream, upstream, upstream, upstream, upstream	1	1	1	1	1	1	1	1	88	57	29	96	109	49	29	141	1	LRMM_4	141	Gene MRPS12	RPSM12, RPMS12, MPR-S12, RPS12, MRPS12, MT-RPS12	mitochondrial ribosomal protein S12	NM_021107.1, NM_033363.1, NM_033362.3		NP_066930.1, NP_203527.1, NP_203526.1
GeneID:115290	FBXO17	19	38941401	38975813	34412	-	1	LRMM_2::8727	45157	downstream	0	0	0	0	0	1	0	0	88	57	29	96	109	49	29	141	1	LRMM_4	141	Gene FBXO17	Fbx17, FLJ11798, FBXO17, FBG4, FBX26, FLJ25205, FLJ58300, MGC9379, FBXO26	F-box protein 17	NM_148169.2, NM_024907.6, NR_104026.1		NP_680474.1, NP_079183.4
GeneID:105378614	LOC105378614	1	19591802	19596872	5070	-	8	NDMM_1::155, NDMM_2::152, NDMM_3::103, LRMM_1::176, LRMM_2::173, LRMM_3::117, NDMM_4::151, LRMM_4::166	-40, -120, -120, 40, -280, 40, 200, 40	upstream, upstream, upstream, in gene, upstream, in gene, in gene, in gene	1	1	1	1	1	1	1	1	54	55	32	41	99	74	22	141	1	LRMM_4	141	Gene LOC105378614		uncharacterized LOC105378614	XR_947026.1
GeneID:100532736	MINOS1-NBL1	1	19596977	19658456	61479	+	8	NDMM_1::155, NDMM_2::152, NDMM_3::103, LRMM_1::176, LRMM_2::173, LRMM_3::117, NDMM_4::151, LRMM_4::166	-65, 15, 15, -145, 175, -145, -305, -145	upstream, in gene, in gene, upstream, in gene, upstream, upstream, upstream	1	1	1	1	1	1	1	1	54	55	32	41	99	74	22	141	1	LRMM_4	141	Gene MINOS1-NBL1	FLJ45636, C1orf151-NBL1, MINOS1-NBL1	MINOS1-NBL1 readthrough	NM_001204088.1, NM_001204089.1		NP_001191017.1, NP_001191018.1
GeneID:440574	MINOS1	1	19596977	19629821	32844	+	8	NDMM_1::155, NDMM_2::152, NDMM_3::103, LRMM_1::176, LRMM_2::173, LRMM_3::117, NDMM_4::151, LRMM_4::166	-65, 15, 15, -145, 175, -145, -305, -145	upstream, in gene, in gene, upstream, in gene, upstream, upstream, upstream	1	1	1	1	1	1	1	1	54	55	32	41	99	74	22	141	1	LRMM_4	141	Gene MINOS1	C1orf151, FLJ75158, MINOS1, FLJ36999, MIO10, Mic10	mitochondrial inner membrane organizing system 1	NM_001032363.3, NR_033757.2, NR_033758.2, NM_001204082.1, NM_001204083.1		NP_001027535.1, NP_001191011.1, NP_001191012.1
GeneID:105374926	LOC105374926	6	11219861	11232127	12266	-	7	NDMM_1::13396, NDMM_2::12674, NDMM_3::9579, LRMM_1::15782, LRMM_3::10092, NDMM_4::16105, LRMM_4::15288	-545, -609, -545, -529, -609, -609, -609	upstream, upstream, upstream, upstream, upstream, upstream, upstream	1	1	1	1	1	0	1	1	79	80	53	66	38	4	21	141	1	LRMM_4	141	Gene LOC105374926		uncharacterized LOC105374926	XR_954247.1, XR_926476.1
GeneID:23152	CIC	19	42268537	42295796	27259	+	23	NDMM_1::7899, NDMM_1::7900, NDMM_1::7901, NDMM_2::7294, NDMM_2::7295, NDMM_2::7296, NDMM_3::5718, LRMM_1::9218, LRMM_1::9219, LRMM_1::9220, LRMM_2::8801, LRMM_2::8802, LRMM_3::5942, LRMM_3::5943, NDMM_4::9373, NDMM_4::9374, NDMM_4::9375, NDMM_4::9376, LRMM_4::9227, LRMM_4::9228, LRMM_4::9229, LRMM_4::9230, LRMM_4::9231	359, 15191, 33895, 359, 15047, 33975, 359, 359, 15207, 34007, 455, 15159, 407, 15175, 455, 15175, 27668, 33895, 455, 12071, 15175, 27623, 33991	in gene, in gene, downstream, in gene, in gene, downstream, in gene, in gene, in gene, downstream, in gene, in gene, in gene, in gene, in gene, in gene, downstream, downstream, in gene, in gene, in gene, downstream, downstream	1	1	1	1	1	1	1	1	61.8	37.2	27	71.8	80.8	35.2	28.2	140.4	5	LRMM_4	374	Gene CIC	KIAA0306, CIC	capicua transcriptional repressor	XM_005258673.1, XM_005258674.1, XM_005258675.1, NM_001304815.1, NM_015125.4, XM_011526660.1, XM_011526661.1, XM_011526662.1, XM_011526663.1, XM_011526664.1, XM_011526665.1, XM_011526666.1, XR_935775.1, XM_011526667.1, XR_935776.1, XR_935777.1, XR_935778.1		XP_005258730.1, XP_005258731.1, XP_005258732.1, NP_001291744.1, NP_055940.3
GeneID:9219	MTA2	11	62593203	62601840	8637	-	19	NDMM_1::2582, NDMM_1::2583, NDMM_1::2584, NDMM_2::2604, NDMM_2::2605, NDMM_3::2042, NDMM_3::2043, LRMM_1::3253, LRMM_1::3254, LRMM_2::3157, LRMM_2::3158, LRMM_3::2123, LRMM_3::2124, NDMM_4::3083, NDMM_4::3084, NDMM_4::3085, LRMM_4::3137, LRMM_4::3138, LRMM_4::3139	10000, 2528, -144, 9952, 208, 9904, 80, 10000, 176, 10000, -48, 10000, -16, 9904, 2512, -16, 10000, 2512, 16	downstream, in gene, upstream, downstream, in gene, downstream, in gene, downstream, in gene, downstream, upstream, downstream, upstream, downstream, in gene, upstream, downstream, in gene, in gene	1	1	1	1	1	1	1	1	74.333	51.667	33	111.333	121.333	47.333	40.333	140.333	3	LRMM_4	180	Gene MTA2	MTA1L1, DKFZp686F2281, MTA2, PID	metastasis associated 1 family member 2	NM_004739.3		NP_004730.2
GeneID:100131434	LINC00893	X	149527591	149539752	12161	-	19	NDMM_1::17068, NDMM_2::15999, NDMM_2::16000, NDMM_3::12198, NDMM_3::12199, LRMM_1::20499, LRMM_1::20500, LRMM_1::20501, LRMM_2::19449, LRMM_2::19450, LRMM_3::12710, NDMM_4::20779, NDMM_4::20780, NDMM_4::20781, NDMM_4::20782, LRMM_4::19281, LRMM_4::19282, LRMM_4::19283, LRMM_4::19284	-1176, 13592, -1080, -1032, -1704, 14312, 13352, -1144, 14312, -1144, -1240, 14312, 13544, 168, -1048, 14312, 13544, 104, -1144	upstream, downstream, upstream, upstream, upstream, downstream, downstream, upstream, downstream, upstream, upstream, downstream, downstream, in gene, upstream, downstream, downstream, in gene, upstream	1	1	1	1	1	1	1	1	28	30	17.333	43	67.333	26	23.333	140.333	3	LRMM_4	248	Gene LINC00893	FLJ44451, FLJ42046, LINC00893, FLJ59110, FLJ17161, FLJ17999, AF011889.4	long intergenic non-protein coding RNA 893	NR_027455.5
GeneID:1111	CHEK1	11	125624920	125676259	51339	+	8	NDMM_1::3149, NDMM_2::3077, NDMM_3::2388, LRMM_1::3860, LRMM_2::3697, LRMM_3::2498, NDMM_4::3647, LRMM_4::3735	776, 872, 904, 776, 776, 872, 872, 872	in gene, in gene, in gene, in gene, in gene, in gene, in gene, in gene	1	1	1	1	1	1	1	1	77	73	44	109	131	80	59	140	1	LRMM_4	140	Gene CHEK1	CHK1, CHEK1		NM_001114121.2, NM_001114122.2, NM_001244846.1, NM_001274.5, NR_045204.1, NR_045205.1, XM_011542560.1, XM_011542561.1, XM_011542562.1, XM_011542563.1		NP_001107593.1, NP_001107594.1, NP_001231775.1, NP_001265.2
GeneID:5711	PSMD5	9	120814779	120843021	28242	-	8	NDMM_1::16517, NDMM_2::15423, NDMM_3::11812, LRMM_1::19754, LRMM_2::18779, LRMM_3::12317, NDMM_4::19979, LRMM_4::18497	77, 29, 109, -83, -115, -115, -51, -83	in gene, in gene, in gene, upstream, upstream, upstream, upstream, upstream	1	1	1	1	1	1	1	1	57	28	29	101	210	97	46	140	1	LRMM_1	210	Gene PSMD5	KIAA0072, S5B, MGC23145, PSMD5	proteasome 26S subunit, non-ATPase 5	NM_001270427.1, NM_005047.3, XM_011518866.1, XM_011518867.1		NP_001257356.1, NP_005038.1
GeneID:208	AKT2	19	40230317	40285531	55214	-	8	NDMM_1::7840, NDMM_2::7244, NDMM_3::5682, LRMM_1::9163, LRMM_2::8747, LRMM_3::5897, NDMM_4::9313, LRMM_4::9158	-69, -101, -5, -37, -101, -101, -69, -5	upstream, upstream, upstream, upstream, upstream, upstream, upstream, upstream	1	1	1	1	1	1	1	1	83	58	26	129	131	43	32	140	1	LRMM_4	140	Gene AKT2	RAC-BETA, PRKBB, AKT2, PKBBETA, PKBB, HIHGHH	v-akt murine thymoma viral oncogene homolog 2	NM_001626.5, NM_001243028.2, NM_001243027.2, XM_011526614.1, XM_011526615.1, XM_011526616.1, XM_011526617.1, XM_011526618.1, XM_011526619.1, XM_011526620.1, XM_011526621.1, XM_011526622.1		NP_001617.1, NP_001229957.1, NP_001229956.1
GeneID:693226	MIR641	19	40282543	40282641	98	-	8	NDMM_1::7840, NDMM_2::7244, NDMM_3::5682, LRMM_1::9163, LRMM_2::8747, LRMM_3::5897, NDMM_4::9313, LRMM_4::9158	-2959, -2991, -2895, -2927, -2991, -2991, -2959, -2895	upstream, upstream, upstream, upstream, upstream, upstream, upstream, upstream	1	1	1	1	1	1	1	1	83	58	26	129	131	43	32	140	1	LRMM_4	140	Gene MIR641	hsa-mir-641, MIR641, mir-641, MIRN641	microRNA 641
GeneID:105372400	LOC105372400	19	40286431	40293192	6761	+	8	NDMM_1::7840, NDMM_2::7244, NDMM_3::5682, LRMM_1::9163, LRMM_2::8747, LRMM_3::5897, NDMM_4::9313, LRMM_4::9158	-831, -799, -895, -863, -799, -799, -831, -895	upstream, upstream, upstream, upstream, upstream, upstream, upstream, upstream	1	1	1	1	1	1	1	1	83	58	26	129	131	43	32	140	1	LRMM_4	140	Gene LOC105372400		uncharacterized LOC105372400	XR_919643.1, XR_935967.1
GeneID:55644	OSGEP	14	20447048	20455108	8060	-	16	NDMM_1::4359, NDMM_1::4360, NDMM_2::4298, NDMM_2::4299, NDMM_3::3346, NDMM_3::3347, LRMM_1::5183, LRMM_1::5184, LRMM_2::5029, LRMM_2::5030, LRMM_3::3426, LRMM_3::3427, NDMM_4::5170, NDMM_4::5171, LRMM_4::5154, LRMM_4::5155	100, -6556, 68, -6012, 143, -6620, 68, -6556, 100, -5948, 84, -6492, 68, -6492, 68, -6556	in gene, upstream, in gene, upstream, in gene, upstream, in gene, upstream, in gene, upstream, in gene, upstream, in gene, upstream, in gene, upstream	1	1	1	1	1	1	1	1	94	49.5	42.5	135.5	139	75.5	67.5	139.5	2	LRMM_1	162	Gene OSGEP	KAE1, OSGEP1, OSGEP, FLJ20411, GCPL1, PRSMG1	O-sialoglycoprotein endopeptidase	NM_017807.3, XM_011536930.1, XM_011536931.1, XM_011536932.1		NP_060277.1
GeneID:328	APEX1	14	20455131	20457772	2641	+	16	NDMM_1::4359, NDMM_1::4360, NDMM_2::4298, NDMM_2::4299, NDMM_3::3346, NDMM_3::3347, LRMM_1::5183, LRMM_1::5184, LRMM_2::5029, LRMM_2::5030, LRMM_3::3426, LRMM_3::3427, NDMM_4::5170, NDMM_4::5171, LRMM_4::5154, LRMM_4::5155	-123, 6533, -91, 5989, -166, 6597, -91, 6533, -123, 5925, -107, 6469, -91, 6469, -91, 6533	upstream, downstream, upstream, downstream, upstream, downstream, upstream, downstream, upstream, downstream, upstream, downstream, upstream, downstream, upstream, downstream	1	1	1	1	1	1	1	1	94	49.5	42.5	135.5	139	75.5	67.5	139.5	2	LRMM_1	162	Gene APEX1	APE1, APEX1, APX, APEX, REF1, APEN, APE, HAP1	apurinic/apyrimidinic endodeoxyribonuclease 1	NM_001244249.1, NM_001641.3, NM_080648.2, NM_080649.2, XM_005267581.3, XM_005267582.3		NP_001231178.1, NP_001632.2, NP_542379.1, NP_542380.1
GeneID:101927100	LOC101927100	5	115602155	115620419	18264	+	17	NDMM_1::12856, NDMM_1::12857, NDMM_2::12176, NDMM_2::12177, NDMM_3::9241, NDMM_3::9242, LRMM_1::15169, LRMM_1::15170, LRMM_2::14806, LRMM_2::14807, LRMM_3::9713, LRMM_3::9714, LRMM_3::9715, NDMM_4::15510, NDMM_4::15511, LRMM_4::14646, LRMM_4::14647	117, 23797, 149, 23829, -203, 23797, -43, 23797, 149, 23797, -43, 23797, 24149, 213, 23845, -43, 23813	in gene, downstream, in gene, downstream, upstream, downstream, upstream, downstream, in gene, downstream, upstream, downstream, downstream, in gene, downstream, upstream, downstream	1	1	1	1	1	1	1	1	71.5	69.5	48	53.5	72	95.5	55	139.5	2	LRMM_4	190	Gene LOC101927100	AC010226.4	uncharacterized LOC101927100	NR_109875.1, NR_109874.1
GeneID:54956	PARP16	15	65234464	65286884	52420	-	16	NDMM_1::5436, NDMM_1::5437, NDMM_2::4965, NDMM_2::4966, NDMM_3::4037, NDMM_3::4038, LRMM_1::6157, LRMM_1::6158, LRMM_2::6048, LRMM_2::6049, LRMM_3::4112, LRMM_3::4113, NDMM_4::6254, NDMM_4::6255, LRMM_4::6172, LRMM_4::6173	292, -8956, -140, -9084, -124, -9084, -124, -9084, 420, -8956, 452, -9084, 36, -8956, 36, -8956	in gene, upstream, upstream, upstream, upstream, upstream, upstream, upstream, in gene, upstream, in gene, upstream, in gene, upstream, in gene, upstream	1	1	1	1	1	1	1	1	88.5	44.5	39	48	118.5	77.5	49	139.5	2	LRMM_4	214	Gene PARP16	C15orf30, FLJ25281, PARP16, FLJ20509, pART15, ARTD15	poly(ADP-ribose) polymerase family member 16	NM_017851.4, XM_005254516.3, XM_006720589.2, XM_006720590.2, XR_429459.2, XR_429460.2, XM_006720592.2, XM_011521742.1		NP_060321.3
GeneID:26007	TKFC	11	61333182	61353139	19957	+	17	NDMM_1::2568, NDMM_1::2569, NDMM_2::2592, NDMM_2::2593, NDMM_2::2594, NDMM_3::2031, NDMM_3::2032, LRMM_1::3236, LRMM_1::3237, LRMM_2::3138, LRMM_2::3139, LRMM_3::2110, LRMM_3::2111, NDMM_4::3062, NDMM_4::3063, LRMM_4::3118, LRMM_4::3119	-158, 28946, -254, 98, 28850, -254, 28818, -190, 28962, -238, 28834, -158, 28850, -158, 28850, -158, 28866	upstream, downstream, upstream, in gene, downstream, upstream, downstream, upstream, downstream, upstream, downstream, upstream, downstream, upstream, downstream, upstream, downstream	1	1	1	1	1	1	1	1	59	42	29.5	69	102.5	53	39.5	139.5	2	LRMM_4	202	Gene TKFC	TKFC, MGC5621, DAK, NET45, DKFZp586B1621	triokinase and FMN cyclase	NM_015533.3, XM_011544910.1, XM_011544911.1, XM_011544912.1, XM_011544913.1, XM_011544914.1, XM_011544915.1, XM_011544916.1, XM_011544917.1, XM_011544918.1, XM_011544919.1, XM_011544920.1, XM_011544921.1, XM_011544922.1, XM_011544923.1		NP_056348.2
GeneID:3066	HDAC2	6	113936156	113971195	35039	-	12	NDMM_1::14014, NDMM_1::14015, NDMM_2::13244, NDMM_2::13245, NDMM_3::10047, LRMM_1::16455, LRMM_1::16456, LRMM_2::16196, LRMM_3::10622, NDMM_4::16948, NDMM_4::16949, LRMM_4::15994	667, -133, 475, -133, -69, 795, -101, -101, -69, 731, -101, -117	in gene, upstream, in gene, upstream, upstream, in gene, upstream, upstream, upstream, in gene, upstream, upstream	1	1	1	1	1	1	1	1	76	55	48	179	171	93	87	139	1	NDMM_4	179	Gene HDAC2	YAF1, HDAC2, RPD3	histone deacetylase 2	NM_001527.3, NR_033441.1, NR_073443.1, XM_011535786.1, XM_011535787.1, XM_011535788.1		NP_001518.3
GeneID:101927768	LOC101927768	6	113969701	114340729	371028	+	13	NDMM_1::14014, NDMM_1::14015, NDMM_2::13244, NDMM_2::13245, NDMM_3::10047, LRMM_1::16455, LRMM_1::16456, LRMM_2::16196, LRMM_3::10622, NDMM_4::16948, NDMM_4::16949, LRMM_4::15994, LRMM_1::16457	827, 1627, 1019, 1627, 1563, 699, 1595, 1595, 1563, 763, 1595, 1611, 72635	in gene, in gene, in gene, in gene, in gene, in gene, in gene, in gene, in gene, in gene, in gene, in gene, in gene	1	1	1	1	1	1	1	1	40.5	31	24.5	90.5	99	93	87	139	2	NDMM_4	179	Gene LOC101927768	RP3-399L15.3	uncharacterized LOC101927768	NR_125845.1
GeneID:154	ADRB2	5	148826593	148828634	2041	+	24	NDMM_1::13073, NDMM_1::13074, NDMM_1::13075, NDMM_2::12383, NDMM_2::12384, NDMM_3::9400, NDMM_3::9401, NDMM_3::9402, LRMM_1::15427, LRMM_1::15428, LRMM_1::15429, LRMM_2::15099, LRMM_2::15100, LRMM_2::15101, LRMM_3::9883, LRMM_3::9884, LRMM_3::9885, NDMM_4::15745, NDMM_4::15746, NDMM_4::15747, NDMM_4::15748, LRMM_4::14896, LRMM_4::14897, LRMM_4::14898	-321, 5343, 8255, -321, 5311, -289, 5343, 8255, -321, 5471, 8255, -321, 5311, 8351, -225, 5119, 8255, -289, 5343, 7551, 8287, -257, 5327, 8271	upstream, downstream, downstream, upstream, downstream, upstream, downstream, downstream, upstream, downstream, downstream, upstream, downstream, downstream, upstream, downstream, downstream, upstream, downstream, downstream, downstream, upstream, downstream, downstream	1	1	1	1	1	1	1	1	80.667	56	47	78.333	142.333	105.667	71.667	139	3	LRMM_1	236	Gene ADRB2	B2AR, BETA2AR, ADRB2, ADRB2R, BAR, ADRBR	adrenoceptor beta 2	NM_000024.5		NP_000015.1
GeneID:26354	GNL3	3	52685920	52694497	8577	+	9	NDMM_1::10770, NDMM_1::10771, NDMM_2::10174, NDMM_3::7821, LRMM_1::12942, LRMM_2::12139, LRMM_3::8255, NDMM_4::13153, LRMM_4::12555	-64, 11616, -128, -64, -128, -64, -64, -64, -128	upstream, downstream, upstream, upstream, upstream, upstream, upstream, upstream, upstream	1	1	1	1	1	1	1	1	72.5	58	55.5	109	199.5	90	67	139	2	LRMM_1	394	Gene GNL3	MGC800, C77032, GNL3, NS, E2IG3	G protein nucleolar 3	NM_014366.4, NM_206825.1, NM_206826.1		NP_055181.3, NP_996561.1, NP_996562.1
GeneID:692089	SNORD19	3	52689240	52689315	75	+	9	NDMM_1::10770, NDMM_1::10771, NDMM_2::10174, NDMM_3::7821, LRMM_1::12942, LRMM_2::12139, LRMM_3::8255, NDMM_4::13153, LRMM_4::12555	-3384, 8296, -3448, -3384, -3448, -3384, -3384, -3384, -3448	upstream, downstream, upstream, upstream, upstream, upstream, upstream, upstream, upstream	1	1	1	1	1	1	1	1	72.5	58	55.5	109	199.5	90	67	139	2	LRMM_1	394	Gene SNORD19	SNORD19, HBII-108	small nucleolar RNA, C/D box 19	NR_003047.1
GeneID:100113381	SNORD19B	3	52690738	52690830	92	+	9	NDMM_1::10770, NDMM_1::10771, NDMM_2::10174, NDMM_3::7821, LRMM_1::12942, LRMM_2::12139, LRMM_3::8255, NDMM_4::13153, LRMM_4::12555	-4882, 6798, -4946, -4882, -4946, -4882, -4882, -4882, -4946	upstream, downstream, upstream, upstream, upstream, upstream, upstream, upstream, upstream	1	1	1	1	1	1	1	1	72.5	58	55.5	109	199.5	90	67	139	2	LRMM_1	394	Gene SNORD19B	SNORD19B	small nucleolar RNA, C/D box 19B	NR_003687.1
GeneID:692109	SNORD69	3	52692736	52692812	76	+	9	NDMM_1::10770, NDMM_1::10771, NDMM_2::10174, NDMM_3::7821, LRMM_1::12942, LRMM_2::12139, LRMM_3::8255, NDMM_4::13153, LRMM_4::12555	-6880, 4800, -6944, -6880, -6944, -6880, -6880, -6880, -6944	upstream, downstream, upstream, upstream, upstream, upstream, upstream, upstream, upstream	1	1	1	1	1	1	1	1	72.5	58	55.5	109	199.5	90	67	139	2	LRMM_1	394	Gene SNORD69	HBII-210, SNORD69	small nucleolar RNA, C/D box 69	NR_003057.1
GeneID:105374082	LOC105374082	3	125904962	125908478	3516	-	10	NDMM_1::11103, NDMM_1::11104, NDMM_2::10508, NDMM_3::8061, LRMM_1::13286, LRMM_2::12472, LRMM_2::12473, LRMM_3::8480, NDMM_4::13483, LRMM_4::12857	-7746, -8258, -7554, -7698, -7650, -7554, -8194, -7666, -7570, -7586	upstream, upstream, upstream, upstream, upstream, upstream, upstream, upstream, upstream, upstream	1	1	1	1	1	1	1	1	69	69	51	175	195	78	53	139	1	LRMM_1	195	Gene LOC105374082		uncharacterized LOC105374082	XR_942082.1, XR_942090.1, XR_924436.1, XR_924437.1
GeneID:102723696	LOC102723696	3	125908519	125916486	7967	-	10	NDMM_1::11103, NDMM_1::11104, NDMM_2::10508, NDMM_3::8061, LRMM_1::13286, LRMM_2::12472, LRMM_2::12473, LRMM_3::8480, NDMM_4::13483, LRMM_4::12857	262, -250, 454, 310, 358, 454, -186, 342, 438, 422	in gene, upstream, in gene, in gene, in gene, in gene, upstream, in gene, in gene, in gene	1	1	1	1	1	1	1	1	69	69	51	175	195	78	53	139	1	LRMM_1	195	Gene LOC102723696		uncharacterized LOC102723696	XR_431627.2, XR_924429.1, XR_924430.1, XR_924431.1, XR_924432.1, XR_924433.1, XR_924434.1, XR_924435.1, XR_427407.2
GeneID:54851	ANKRD49	11	94493987	94499578	5591	+	8	NDMM_1::2921, NDMM_2::2890, NDMM_3::2252, LRMM_1::3657, LRMM_2::3514, LRMM_3::2364, NDMM_4::3449, LRMM_4::3520	-35, -35, -3, 61, -227, 77, 61, 61	upstream, upstream, upstream, in gene, upstream, in gene, in gene, in gene	1	1	1	1	1	1	1	1	90	51	55	94	121	62	52	139	1	LRMM_4	139	Gene ANKRD49	GBIF, ANKRD49, FLJ20189, FLJ20441, FGIF	ankyrin repeat domain 49	NM_017704.2		NP_060174.2
GeneID:29882	ANAPC2	9	137174784	137188605	13821	-	8	NDMM_1::16731, NDMM_2::15594, NDMM_3::11942, LRMM_1::20029, LRMM_2::18985, LRMM_3::12458, NDMM_4::20270, LRMM_4::18739	-227, -259, -579, -227, -227, -227, -227, -227	upstream, upstream, upstream, upstream, upstream, upstream, upstream, upstream	1	1	1	1	1	1	1	1	73	47	39	96	190	49	52	139	1	LRMM_1	190	Gene ANAPC2	RP11-350O14.5, ANAPC2, APC2	anaphase promoting complex subunit 2	NM_013366.3, XR_929779.1, XR_929780.1, XR_929781.1		NP_037498.1
GeneID:8636	SSNA1	9	137188602	137190370	1768	+	8	NDMM_1::16731, NDMM_2::15594, NDMM_3::11942, LRMM_1::20029, LRMM_2::18985, LRMM_3::12458, NDMM_4::20270, LRMM_4::18739	230, 262, 582, 230, 230, 230, 230, 230	in gene, in gene, in gene, in gene, in gene, in gene, in gene, in gene	1	1	1	1	1	1	1	1	73	47	39	96	190	49	52	139	1	LRMM_1	190	Gene SSNA1	NA14, SSNA1, N14, NA-14	Sjogren syndrome nuclear autoantigen 1	NM_003731.2		NP_003722.2
GeneID:63933	MCUR1	6	13786549	13814563	28014	-	8	NDMM_1::13425, NDMM_2::12704, NDMM_3::9594, LRMM_1::15793, LRMM_2::15469, LRMM_3::10114, NDMM_4::16147, LRMM_4::15327	195, 451, 227, 211, 211, 227, 195, 227	in gene, in gene, in gene, in gene, in gene, in gene, in gene, in gene	1	1	1	1	1	1	1	1	44	46	37	86	98	60	49	139	1	LRMM_4	139	Gene MCUR1	MCUR1, CCDC90A, FLJ20958, C6orf79		NM_001031713.3, XM_011514802.1		NP_001026883.1
GeneID:1316	KLF6	10	3775996	3785281	9285	-	8	NDMM_1::1561, NDMM_2::1599, NDMM_3::1233, LRMM_1::2103, LRMM_2::1990, LRMM_3::1407, NDMM_4::1843, LRMM_4::2039	-511, -223, -367, -287, -287, -415, -159, -287	upstream, upstream, upstream, upstream, upstream, upstream, upstream, upstream	1	1	1	1	1	1	1	1	72	83	64	125	176	129	44	139	1	LRMM_1	176	Gene KLF6	PAC1, ST12, CPBP, DKFZp686N0199, COPEB, GBF, BCD1, ZF9, KLF6, CBA1	Kruppel-like factor 6	NM_001300.5, NM_001160124.1, NM_001160125.1, NR_027653.1		NP_001291.3, NP_001153596.1, NP_001153597.1
GeneID:7203	CCT3	1	156308961	156338415	29454	-	8	NDMM_1::1008, NDMM_2::1001, NDMM_3::785, LRMM_1::1202, LRMM_2::1188, LRMM_3::861, NDMM_4::1052, LRMM_4::1257	-113, -177, -209, -145, -177, 47, -177, -177	upstream, upstream, upstream, upstream, upstream, in gene, upstream, upstream	1	1	1	1	1	1	1	1	49	50	32	94	273	95	29	139	1	LRMM_1	273	Gene CCT3	TRIC5, PIG48, CCT-gamma, TCP-1-gamma, CCT3, CCTG	chaperonin containing TCP1 subunit 3	NM_001008800.2, NM_005998.4, NR_036564.1, NR_036565.1		NP_001008800.1, NP_005989.3
GeneID:128229	TSACC	1	156337314	156346995	9681	+	8	NDMM_1::1008, NDMM_2::1001, NDMM_3::785, LRMM_1::1202, LRMM_2::1188, LRMM_3::861, NDMM_4::1052, LRMM_4::1257	1214, 1278, 1310, 1246, 1278, 1054, 1278, 1278	in gene, in gene, in gene, in gene, in gene, in gene, in gene, in gene	1	1	1	1	1	1	1	1	49	50	32	94	273	95	29	139	1	LRMM_1	273	Gene TSACC	TSACC, RP11-443G18.5, SIP, C1orf182, MGC26877, SSTK-IP	TSSK6 activating co-chaperone	NM_001304821.1, NM_001304826.1, NM_144627.4, NM_001304819.1, NM_001304823.1, NM_001304824.1, NM_001304817.1, NM_001304825.1, NM_001304818.1, NM_001304822.1, NM_001304820.1, NR_130913.1		NP_001291750.1, NP_001291755.1, NP_653228.1, NP_001291748.1, NP_001291752.1, NP_001291753.1, NP_001291746.1, NP_001291754.1, NP_001291747.1, NP_001291751.1, NP_001291749.1
GeneID:158297	SAXO1	9	18927660	19049354	121694	-	8	NDMM_1::16085, NDMM_2::15044, NDMM_3::11531, LRMM_1::19174, LRMM_2::18327, LRMM_3::12015, NDMM_4::19453, LRMM_4::17986	-102, -70, 106, -118, -118, 234, 74, -86	upstream, upstream, in gene, upstream, upstream, in gene, in gene, upstream	1	1	1	1	1	1	1	1	51	47	26	47	123	54	26	139	1	LRMM_4	139	Gene SAXO1	SAXO1, C9orf138, FAM154A, FLJ35283, MGC35182	stabilizer of axonemal microtubules 1	NM_153707.3, NM_001287050.1, NM_001287049.1, XM_011517744.1, XM_011517745.1, XM_011517746.1, XM_011517747.1		NP_714918.2, NP_001273979.1, NP_001273978.1
GeneID:10670	RRAGA	9	19049374	19051025	1651	+	8	NDMM_1::16085, NDMM_2::15044, NDMM_3::11531, LRMM_1::19174, LRMM_2::18327, LRMM_3::12015, NDMM_4::19453, LRMM_4::17986	82, 50, -126, 98, 98, -254, -94, 66	in gene, in gene, upstream, in gene, in gene, upstream, upstream, in gene	1	1	1	1	1	1	1	1	51	47	26	47	123	54	26	139	1	LRMM_4	139	Gene RRAGA	RAGA, FIP1, FIP-1, RRAGA	Ras related GTP binding A	NM_006570.4		NP_006561.1
GeneID:79165	LENG1	19	54155639	54159743	4104	-	6	NDMM_1::8075, NDMM_2::7450, LRMM_1::9405, LRMM_2::8964, NDMM_4::9607, LRMM_4::9453	-129, -113, -65, -129, -129, -129	upstream, upstream, upstream, upstream, upstream, upstream	1	1	0	1	1	1	0	1	50	38	18	61	60	30	16	139	1	LRMM_4	139	Gene LENG1	LENG1	leukocyte receptor cluster (LRC) member 1	NM_024316.2		NP_077292.2
GeneID:105371842	LOC105371842	17	58632920	58651649	18729	+	15	NDMM_1::6817, NDMM_1::6818, NDMM_2::6273, NDMM_2::6274, NDMM_3::5053, NDMM_3::5054, LRMM_1::7852, LRMM_1::7853, LRMM_2::7636, LRMM_2::7637, LRMM_3::5160, NDMM_4::7951, NDMM_4::7952, LRMM_4::7833, LRMM_4::7834	-1048, 26424, -1032, 26408, -1048, 26440, -1016, 26440, -1000, 26408, 26568, -1032, 26456, -1016, 26504	upstream, downstream, upstream, downstream, upstream, downstream, upstream, downstream, upstream, downstream, downstream, upstream, downstream, upstream, downstream	1	1	1	1	1	1	1	1	52.5	34.5	36.5	27	147	41	11.5	139	2	LRMM_1	153	Gene LOC105371842		uncharacterized LOC105371842	XR_918520.1, XR_934885.1
GeneID:90809	TMEM55B	14	20457853	20461612	3759	-	24	NDMM_1::4359, NDMM_1::4360, NDMM_1::4361, NDMM_2::4298, NDMM_2::4299, NDMM_2::4300, NDMM_3::3346, NDMM_3::3347, NDMM_3::3348, LRMM_1::5183, LRMM_1::5184, LRMM_1::5185, LRMM_2::5029, LRMM_2::5030, LRMM_2::5031, LRMM_3::3426, LRMM_3::3427, LRMM_3::3428, NDMM_4::5170, NDMM_4::5171, NDMM_4::5172, LRMM_4::5154, LRMM_4::5155, LRMM_4::5156	6604, -52, -7860, 6572, 492, -7860, 6647, -116, -7860, 6572, -52, -7796, 6604, 556, -7796, 6588, 12, -8020, 6572, 12, -7828, 6572, -52, -7860	downstream, upstream, upstream, downstream, in gene, upstream, downstream, upstream, upstream, downstream, upstream, upstream, downstream, in gene, upstream, downstream, in gene, upstream, downstream, in gene, upstream, downstream, upstream, upstream	1	1	1	1	1	1	1	1	88.667	46.333	48	115	117.667	67.667	52.333	138.667	3	LRMM_1	162	Gene TMEM55B	TMEM55B, C14orf9, DKFZp434M0519, MGC26684	transmembrane protein 55B	NM_144568.3, NM_001100814.2		NP_653169.2, NP_001094284.1
GeneID:105371562	LOC105371562	17	16982763	17006087	23324	+	23	NDMM_1::6447, NDMM_1::6448, NDMM_2::5889, NDMM_2::5890, NDMM_3::4755, NDMM_3::4756, NDMM_3::4757, LRMM_1::7326, LRMM_2::7160, LRMM_2::7161, LRMM_2::7162, LRMM_2::7163, LRMM_3::4848, LRMM_3::4849, LRMM_3::4850, NDMM_4::7451, NDMM_4::7452, NDMM_4::7453, NDMM_4::7454, LRMM_4::7317, LRMM_4::7318, LRMM_4::7319, LRMM_4::7320	-1499, 5493, 5509, 7029, -1691, -1355, 5461, 5493, -1451, 5461, 6485, 7125, -1451, 5493, 7029, -1467, 5493, 6389, 7029, -8843, -1483, 5493, 7029	upstream, in gene, in gene, in gene, upstream, upstream, in gene, in gene, upstream, in gene, in gene, in gene, upstream, in gene, in gene, upstream, in gene, in gene, in gene, upstream, upstream, in gene, in gene	1	1	1	1	1	1	1	1	45.6	33.8	36.4	46.8	24.4	102	44.6	138.6	5	LRMM_4	298	Gene LOC105371562		uncharacterized LOC105371562	XR_917968.1, XR_917969.1, XR_934285.1, XR_934286.1
GeneID:2101	ESRRA	11	64305528	64316743	11215	+	18	NDMM_1::2635, NDMM_1::2636, NDMM_2::2649, NDMM_2::2650, NDMM_2::2651, NDMM_3::2075, NDMM_3::2076, LRMM_1::3308, LRMM_1::3309, LRMM_2::3207, LRMM_2::3208, LRMM_2::3209, LRMM_3::2158, LRMM_3::2159, NDMM_4::3128, NDMM_4::3129, LRMM_4::3189, LRMM_4::3190	-328, 12584, -952, -296, 12520, -952, -280, -600, 12456, -952, -280, 12360, -952, 12568, -312, 12488, -312, 12488	upstream, downstream, upstream, upstream, downstream, upstream, upstream, upstream, downstream, upstream, upstream, downstream, upstream, downstream, upstream, downstream, upstream, downstream	1	1	1	1	1	1	1	1	78.5	48.5	24	99.5	174	58.5	30.5	138.5	2	LRMM_1	223	Gene ESRRA	ERRa, ESRL1, ERRalpha, ERR1, ESRRA, NR3B1	estrogen related receptor alpha	NM_004451.4, NM_001282450.1, NM_001282451.1		NP_004442.3, NP_001269379.1, NP_001269380.1
GeneID:353322	ANKRD37	4	185396686	185400243	3557	+	8	NDMM_1::12247, NDMM_2::11672, NDMM_3::8906, LRMM_1::14581, LRMM_2::14130, LRMM_3::9362, NDMM_4::14889, LRMM_4::14071	-227, -590, -270, -270, -270, -238, -174, -270	upstream, upstream, upstream, upstream, upstream, upstream, upstream, upstream	1	1	1	1	1	1	1	1	79	92	61	126	128	66	62	138	1	LRMM_4	138	Gene ANKRD37	MGC111507, ANKRD37, Lrp2bp	ankyrin repeat domain 37	NM_181726.2, XM_005262981.2		NP_859077.1
GeneID:126298	IRGQ	19	43584367	43596229	11862	-	16	NDMM_1::7910, NDMM_1::7911, NDMM_2::7305, NDMM_2::7306, NDMM_3::5726, NDMM_3::5727, LRMM_1::9230, LRMM_1::9231, LRMM_2::8811, LRMM_2::8812, LRMM_3::5950, LRMM_3::5951, NDMM_4::9392, NDMM_4::9393, LRMM_4::9245, LRMM_4::9246	20677, -187, 20645, -187, 20517, -187, 20677, -187, 20709, -187, 20693, -187, 20581, -187, 20597, 5	downstream, upstream, downstream, upstream, downstream, upstream, downstream, upstream, downstream, upstream, downstream, upstream, downstream, upstream, downstream, in gene	1	1	1	1	1	1	1	1	86	74.5	45	128	94.5	71.5	59.5	138	2	NDMM_4	202	Gene IRGQ	IRGQ, FLJ38849, IRGQ1, FLJ12521, FLJ42796, FLJ46713, FKSG27	immunity-related GTPase family, Q	NM_001007561.2, XM_005258515.2, XM_005258516.2		NP_001007562.1
GeneID:93436	ARMC6	19	19033578	19058178	24600	+	16	NDMM_1::7687, NDMM_1::7688, NDMM_2::7104, NDMM_2::7105, NDMM_3::5599, NDMM_3::5600, LRMM_1::8993, LRMM_1::8994, LRMM_2::8613, LRMM_2::8614, LRMM_3::5801, LRMM_3::5802, NDMM_4::9114, NDMM_4::9115, LRMM_4::8982, LRMM_4::8983	150, 30230, 86, 30390, 86, 30230, 182, 30230, 86, 30230, 134, 30230, 134, 30230, 150, 30230	in gene, downstream, in gene, downstream, in gene, downstream, in gene, downstream, in gene, downstream, in gene, downstream, in gene, downstream, in gene, downstream	1	1	1	1	1	1	1	1	48.5	53	32	101.5	128.5	42.5	47.5	138	2	LRMM_4	194	Gene ARMC6	ARMC6, R30923_1, MGC19595	armadillo repeat containing 6	NM_033415.3, NM_001199196.1, XM_005260157.2, XM_005260158.2, XM_011528439.1, XM_011528440.1		NP_219483.1, NP_001186125.1
GeneID:4296	MAP3K11	11	65597755	65614338	16583	-	22	NDMM_1::2670, NDMM_1::2671, NDMM_2::2678, NDMM_2::2679, NDMM_2::2680, NDMM_3::2110, NDMM_3::2111, NDMM_3::2112, LRMM_1::3361, LRMM_1::3362, LRMM_2::3251, LRMM_2::3252, LRMM_3::2188, LRMM_3::2189, LRMM_3::2190, NDMM_4::3172, NDMM_4::3173, NDMM_4::3174, NDMM_4::3175, LRMM_4::3240, LRMM_4::3241, LRMM_4::3242	25666, -1246, 25954, 146, -1182, 25602, 194, -1150, 25730, -1182, 26114, -1054, 26466, 26018, -1054, 25954, 24354, 162, -1182, 25602, 130, -1246	downstream, upstream, downstream, in gene, upstream, downstream, in gene, upstream, downstream, upstream, downstream, upstream, downstream, downstream, upstream, downstream, downstream, in gene, upstream, downstream, in gene, upstream	1	1	1	1	1	1	1	1	64.25	58	40.75	106.25	117.25	53.75	45.75	138	4	LRMM_4	312	Gene MAP3K11	PTK1, MLK3, MEKK11, SPRK, MLK-3, MAP3K11, MGC17114	mitogen-activated protein kinase kinase kinase 11	NM_002419.3, XR_428915.1		NP_002410.1
GeneID:55805	LRP2BP	4	185363878	185396935	33057	-	10	NDMM_1::12247, NDMM_2::11672, NDMM_3::8906, LRMM_1::14581, LRMM_2::14129, LRMM_2::14130, LRMM_3::9361, LRMM_3::9362, NDMM_4::14889, LRMM_4::14071	476, 839, 519, 519, 34055, 519, 33895, 487, 423, 519	in gene, in gene, in gene, in gene, downstream, in gene, downstream, in gene, in gene, in gene	1	1	1	1	1	1	1	1	79	47	33.5	66	65	45	41	138	2	LRMM_4	138	Gene LRP2BP	LRP2BP, FLJ44965, DKFZp761O0113	LRP2 binding protein	NM_018409.3, XM_011532108.1, XM_011532109.1, XM_006714260.2, XM_006714261.2, XM_011532110.1, XM_011532111.1, XM_006714265.2, XM_011532112.1, XM_005263125.3, XM_011532113.1		NP_060879.2
GeneID:105377591	LOC105377591	4	185370725	185392840	22115	+	10	NDMM_1::12247, NDMM_2::11672, NDMM_3::8906, LRMM_1::14581, LRMM_2::14129, LRMM_2::14130, LRMM_3::9361, LRMM_3::9362, NDMM_4::14889, LRMM_4::14071	25734, 25371, 25691, 25691, -7845, 25691, -7685, 25723, 25787, 25691	downstream, downstream, downstream, downstream, upstream, downstream, upstream, downstream, downstream, downstream	1	1	1	1	1	1	1	1	79	47	33.5	66	65	45	41	138	2	LRMM_4	138	Gene LOC105377591		uncharacterized LOC105377591	XR_951433.1, XR_951436.1, XR_939581.1, XR_939582.1
GeneID:55311	ZNF444	19	56140951	56160893	19942	+	8	NDMM_1::8109, NDMM_2::7474, NDMM_3::5831, LRMM_1::9435, LRMM_2::8989, LRMM_3::6086, NDMM_4::9648, LRMM_4::9481	73, 73, 105, 73, 9, 84, 73, 73	in gene, in gene, in gene, in gene, in gene, in gene, in gene, in gene	1	1	1	1	1	1	1	1	65	39	20	89	76	33	34	138	1	LRMM_4	138	Gene ZNF444	ZSCAN17, FLJ11137, EZF-2, ZNF444, EZF2	zinc finger protein 444	NM_001253792.1, NM_018337.3, XM_005259035.1, XM_005259036.1, XM_005259034.2, XM_011527068.1, XM_011527069.1, XM_011527070.1, XM_011527071.1, XM_011527072.1, XM_011527073.1		NP_001240721.1, NP_060807.2, XP_005259092.1, XP_005259093.1
GeneID:105372466	LOC105372466	19	56148100	56149645	1545	-	8	NDMM_1::8109, NDMM_2::7474, NDMM_3::5831, LRMM_1::9435, LRMM_2::8989, LRMM_3::6086, NDMM_4::9648, LRMM_4::9481	8621, 8621, 8589, 8621, 8685, 8610, 8621, 8621	downstream, downstream, downstream, downstream, downstream, downstream, downstream, downstream	1	1	1	1	1	1	1	1	65	39	20	89	76	33	34	138	1	LRMM_4	138	Gene LOC105372466		uncharacterized LOC105372466	XR_919757.1, XR_936082.1
GeneID:9643	MORF4L2	X	103675498	103688158	12660	-	10	NDMM_1::16984, NDMM_2::15889, NDMM_3::12121, LRMM_1::20322, LRMM_2::19313, LRMM_3::12639, LRMM_3::12640, NDMM_4::20619, NDMM_4::20620, LRMM_4::19057	1118, 1278, 1267, 1278, 1278, 1566, 766, 1310, 766, 1278	in gene, in gene, in gene, in gene, in gene, in gene, in gene, in gene, in gene, in gene	1	1	1	1	1	1	1	1	43	40	26	63	118	55	25	138	1	LRMM_4	138	Gene MORF4L2	KIAA0026, MORF4L2, MRGX, MORFL2	mortality factor 4 like 2	NM_012286.2, NM_001142418.1, NM_001142419.1, NM_001142420.1, NM_001142421.1, NM_001142422.1, NM_001142423.1, NM_001142424.1, NM_001142425.1, NM_001142426.1, NM_001142427.1, NM_001142428.1, NM_001142429.1, NM_001142430.1, NM_001142431.1, NM_001142432.1		NP_036418.1, NP_001135890.1, NP_001135891.1, NP_001135892.1, NP_001135893.1, NP_001135894.1, NP_001135895.1, NP_001135896.1, NP_001135897.1, NP_001135898.1, NP_001135899.1, NP_001135900.1, NP_001135901.1, NP_001135902.1, NP_001135903.1, NP_001135904.1
GeneID:340544	MORF4L2-AS1	X	103687284	103692560	5276	+	10	NDMM_1::16984, NDMM_2::15889, NDMM_3::12121, LRMM_1::20322, LRMM_2::19313, LRMM_3::12639, LRMM_3::12640, NDMM_4::20619, NDMM_4::20620, LRMM_4::19057	-244, -404, -393, -404, -404, -692, 108, -436, 108, -404	upstream, upstream, upstream, upstream, upstream, upstream, in gene, upstream, in gene, upstream	1	1	1	1	1	1	1	1	43	40	26	63	118	55	25	138	1	LRMM_4	138	Gene MORF4L2-AS1	MORF4L2-AS1, RP5-1055C14.7, FLJ42141	MORF4L2 antisense RNA 1	NR_038978.1
GeneID:118491	CFAP70	10	73253758	73361064	107306	-	23	NDMM_1::1902, NDMM_1::1903, NDMM_1::1904, NDMM_2::1934, NDMM_2::1935, NDMM_2::1936, NDMM_3::1534, NDMM_3::1535, LRMM_1::2444, LRMM_1::2445, LRMM_1::2446, LRMM_2::2414, LRMM_2::2415, LRMM_2::2416, LRMM_3::1624, LRMM_3::1625, LRMM_3::1626, NDMM_4::2254, NDMM_4::2255, NDMM_4::2256, LRMM_4::2381, LRMM_4::2382, LRMM_4::2383	113832, 108456, 2429, 113832, 108392, 2376, 113896, 108488, 113832, 108488, 2424, 113832, 108456, 2568, 113832, 108456, 2376, 113832, 108456, 2376, 113832, 108456, 2376	downstream, downstream, in gene, downstream, downstream, in gene, downstream, downstream, downstream, downstream, in gene, downstream, downstream, in gene, downstream, downstream, in gene, downstream, downstream, in gene, downstream, downstream, in gene	1	1	1	1	1	1	1	1	60	65	38.333	81.333	118	81.333	51.333	137.667	3	LRMM_4	248	Gene CFAP70	TTC18, FLJ25765, RP11-152N13.6, CFAP70, FLJ12173	cilia and flagella associated protein 70	NM_145170.3, XM_006717604.2, XM_006717605.2, XM_006717606.2, XM_006717607.2, XM_011539209.1, XM_006717608.2, XM_011539210.1, XM_005269488.2, XM_011539211.1, XM_005269489.2, XM_006717609.2, XM_006717610.2, XM_011539212.1, XM_006717611.2, XM_011539213.1, XM		NP_660153.3
GeneID:6134	RPL10	X	154398065	154402339	4274	+	21	NDMM_1::17085, NDMM_1::17086, NDMM_1::17087, NDMM_2::16020, NDMM_2::16021, NDMM_2::16022, NDMM_3::12207, LRMM_1::20552, LRMM_1::20553, LRMM_2::19480, LRMM_2::19481, LRMM_3::12738, LRMM_3::12739, LRMM_3::12740, NDMM_4::20810, NDMM_4::20811, NDMM_4::20812, NDMM_4::20813, LRMM_4::19346, LRMM_4::19347, LRMM_4::19348	-369, 13487, 14015, -97, 13503, 13839, 13295, -273, 13487, 15, 13999, -337, 13487, 13999, -273, 207, 13519, 13999, 15, 11359, 13295	upstream, downstream, downstream, upstream, downstream, downstream, downstream, upstream, downstream, in gene, downstream, upstream, downstream, downstream, upstream, in gene, downstream, downstream, in gene, downstream, downstream	1	1	1	1	1	1	1	1	30.667	29	15.333	34.667	72.667	34	45.333	137.667	3	LRMM_4	178	Gene RPL10	FLJ23544, DXS648E, AUTSX5, L10, NOV, FLJ27072, DXS648, DKFZp686J1851, RPL10, QM	ribosomal protein L10	NM_006013.4, NM_001256577.2, NM_001303624.1, NM_001256580.2, NM_001303625.1, NM_001303626.1		NP_006004.3, NP_001243506.2, NP_001290553.1, NP_001243509.2, NP_001290554.1, NP_001290555.1
GeneID:1774	DNASE1L1	X	154401236	154412091	10855	-	21	NDMM_1::17085, NDMM_1::17086, NDMM_1::17087, NDMM_2::16020, NDMM_2::16021, NDMM_2::16022, NDMM_3::12207, LRMM_1::20552, LRMM_1::20553, LRMM_2::19480, LRMM_2::19481, LRMM_3::12738, LRMM_3::12739, LRMM_3::12740, NDMM_4::20810, NDMM_4::20811, NDMM_4::20812, NDMM_4::20813, LRMM_4::19346, LRMM_4::19347, LRMM_4::19348	14395, 539, 11, 14123, 523, 187, 731, 14299, 539, 14011, 27, 14363, 539, 27, 14299, 13819, 507, 27, 14011, 2667, 731	downstream, in gene, in gene, downstream, in gene, in gene, in gene, downstream, in gene, downstream, in gene, downstream, in gene, in gene, downstream, downstream, in gene, in gene, downstream, in gene, in gene	1	1	1	1	1	1	1	1	30.667	29	15.333	34.667	72.667	34	45.333	137.667	3	LRMM_4	178	Gene DNASE1L1	DNASE1L1, DNASEX, DNL1L, XIB, DNAS1L1, G4.8	deoxyribonuclease I-like 1	NM_006730.3, NM_001009932.2, NM_001009933.2, NM_001009934.2, NM_001303620.1, XM_011531121.1, XR_938506.1, XM_005277829.3, XM_011531122.1		NP_006721.1, NP_001009932.1, NP_001009933.1, NP_001009934.1, NP_001290549.1
GeneID:105373689	LOC105373689	2	152175871	152190687	14816	+	8	NDMM_1::8962, NDMM_2::8352, NDMM_3::6460, LRMM_1::10512, LRMM_2::9968, LRMM_3::6773, NDMM_4::10736, LRMM_4::10497	-31, -127, -159, -159, -95, -159, -95, -63	upstream, upstream, upstream, upstream, upstream, upstream, upstream, upstream	1	1	1	1	1	1	1	1	86	93	59	147	161	94	91	137	1	LRMM_1	161	Gene LOC105373689		uncharacterized LOC105373689	XR_932089.1, XR_932095.1, XR_923476.1, XR_923477.1
GeneID:105373688	LOC105373688	2	152178860	152180718	1858	-	8	NDMM_1::8962, NDMM_2::8352, NDMM_3::6460, LRMM_1::10512, LRMM_2::9968, LRMM_3::6773, NDMM_4::10736, LRMM_4::10497	4878, 4974, 5006, 5006, 4942, 5006, 4942, 4910	downstream, downstream, downstream, downstream, downstream, downstream, downstream, downstream	1	1	1	1	1	1	1	1	86	93	59	147	161	94	91	137	1	LRMM_1	161	Gene LOC105373688		uncharacterized LOC105373688	XR_932076.1, XR_923475.1
GeneID:105374155	LOC105374155	3	150759105	150768728	9623	+	8	NDMM_1::11287, NDMM_2::10674, NDMM_3::8184, LRMM_1::13504, LRMM_2::12666, LRMM_3::8592, NDMM_4::13664, LRMM_4::13029	4319, 4575, 4015, 3999, 3999, 4735, 3999, 4319	in gene, in gene, in gene, in gene, in gene, in gene, in gene, in gene	1	1	1	1	1	1	1	1	116	78	80	128	180	96	79	137	1	LRMM_1	180	Gene LOC105374155		uncharacterized LOC105374155	XR_942404.1, XR_942405.1, XR_924579.1, XR_924580.1
GeneID:4085	MAD2L1	4	120059422	120066858	7436	-	8	NDMM_1::12036, NDMM_2::11430, NDMM_3::8734, LRMM_1::14331, LRMM_2::13759, LRMM_3::9189, NDMM_4::14572, LRMM_4::13815	-150, -150, -502, -150, -150, 74, -150, -150	upstream, upstream, upstream, upstream, upstream, in gene, upstream, upstream	1	1	1	1	1	1	1	1	93	112	77	188	150	179	63	137	1	NDMM_4	188	Gene MAD2L1	MAD2, MAD2L1, HSMAD2	MAD2 mitotic arrest deficient-like 1 (yeast)	NM_002358.3		NP_002349.1
GeneID:9409	PEX16	11	45909669	45918123	8454	-	8	NDMM_1::2506, NDMM_2::2531, NDMM_3::1983, LRMM_1::3158, LRMM_2::3077, LRMM_3::2063, NDMM_4::2988, LRMM_4::3041	139, 123, 75, 107, 139, 75, 139, 107	in gene, in gene, in gene, in gene, in gene, in gene, in gene, in gene	1	1	1	1	1	1	1	1	106	49	39	102	166	59	60	137	1	LRMM_1	166	Gene PEX16	PEX16, PBD8B, PBD8A		NM_057174.2, NM_004813.2, XM_011520474.1		NP_476515.1, NP_004804.1
GeneID:115209	OMA1	1	58480719	58546799	66080	-	15	NDMM_1::509, NDMM_1::510, NDMM_2::513, NDMM_2::514, NDMM_3::368, NDMM_3::369, LRMM_1::624, LRMM_2::554, LRMM_2::555, LRMM_3::418, LRMM_3::419, NDMM_4::506, NDMM_4::507, LRMM_4::617, LRMM_4::618	559, 15, 527, 79, 719, 47, 79, 719, -17, 527, 79, 559, 15, 559, 79	in gene, in gene, in gene, in gene, in gene, in gene, in gene, in gene, upstream, in gene, in gene, in gene, in gene, in gene, in gene	1	1	1	1	1	1	1	1	48	56	47	54	73	24	52	137	1	LRMM_4	137	Gene OMA1	OMA1, MPRP-1, YKR087C, peptidase, ZMPOMA1, DAB1, 2010001O09Rik, FLJ33782	OMA1 zinc metallopeptidase	NM_145243.4		NP_660286.1
GeneID:64417	C5orf28	5	43444252	43485178	40926	-	9	NDMM_1::12432, NDMM_2::11826, NDMM_3::8987, LRMM_1::14762, LRMM_2::14359, LRMM_3::9468, LRMM_3::9469, NDMM_4::15094, LRMM_4::14229	1402, 1402, 1434, 1402, 1402, 1402, 698, 1402, 1402	in gene, in gene, in gene, in gene, in gene, in gene, in gene, in gene, in gene	1	1	1	1	1	1	1	1	102	63	49	74	142	87	49	137	1	LRMM_1	142	Gene C5orf28	FLJ21657, MGC149524, MGC90226, C5orf28	chromosome 5 open reading frame 28	NM_022483.4, XM_011514074.1, XM_011514075.1, XM_011514076.1, XM_005248333.3, XM_005248335.3, XM_006714486.2, XM_006714485.2		NP_071928.2
GeneID:101929626	LOC101929626	1	46133371	46139081	5710	+	8	NDMM_1::444, NDMM_2::446, NDMM_3::315, LRMM_1::551, LRMM_2::505, LRMM_3::357, NDMM_4::444, LRMM_4::535	-539, -539, -619, -635, -475, -507, -475, -475	upstream, upstream, upstream, upstream, upstream, upstream, upstream, upstream	1	1	1	1	1	1	1	1	72	43	50	68	106	61	46	137	1	LRMM_4	137	Gene LOC101929626	RP4-533D7.5	uncharacterized LOC101929626	NR_125987.1
GeneID:81689	ISCA1	9	86264546	86282575	18029	-	9	NDMM_1::16315, NDMM_2::15250, NDMM_3::11686, LRMM_1::19481, LRMM_2::18545, LRMM_3::12180, LRMM_3::12181, NDMM_4::19721, LRMM_4::18264	207, 79, 207, 207, -177, 623, 207, 79, 175	in gene, in gene, in gene, in gene, upstream, in gene, in gene, in gene, in gene	1	1	1	1	1	1	1	1	82	70	45	118	208	71	43	137	1	LRMM_1	208	Gene ISCA1	ISCA1, HBLD2, RP11-507D14.2, hIscA, ISA1, MGC4276	iron-sulfur cluster assembly 1	NM_030940.3		NP_112202.2
GeneID:10171	RCL1	9	4792834	4861077	68243	+	12	NDMM_1::16042, NDMM_1::16043, NDMM_2::15001, NDMM_2::15002, NDMM_3::11502, NDMM_3::11503, LRMM_1::19122, LRMM_2::18285, LRMM_3::11977, NDMM_4::19402, LRMM_4::17924, LRMM_4::17925	62, 22782, 158, 22974, -66, 22878, 126, 46, 446, 126, 126, 22846	in gene, in gene, in gene, in gene, upstream, in gene, in gene, in gene, in gene, in gene, in gene, in gene	1	1	1	1	1	1	1	1	39.5	31	21	47	85	31	21	137	2	LRMM_4	195	Gene RCL1	RCL1, RNAC, RPCL1	RNA terminal phosphate cyclase-like 1	NM_001286701.1, NM_005772.4, NM_001286700.1, NM_001286699.1, XM_006716715.2, XM_011517673.1		NP_001273630.1, NP_005763.3, NP_001273629.1, NP_001273628.1
GeneID:604	BCL6	3	187721377	187745725	24348	-	8	NDMM_1::11527, NDMM_2::10866, NDMM_2::10867, NDMM_3::8317, LRMM_1::13755, LRMM_2::12895, NDMM_4::13902, LRMM_4::13251	61, 31965, 45, 93, 61, 114, 125, 157	in gene, downstream, in gene, in gene, in gene, in gene, in gene, in gene	1	1	1	1	1	1	0	1	59.5	19	34.5	41.5	122.5	16	13	137	2	LRMM_4	265	Gene BCL6	BCL5, BCL6, LAZ3, ZNF51, BCL6A, ZBTB27	B-cell CLL/lymphoma 6	NM_001130845.1, NM_001134738.1, NM_001706.4, XM_005247694.2, XM_011513062.1		NP_001124317.1, NP_001128210.1, NP_001697.2
GeneID:100847006	MIR5571	22	22886267	22886379	112	+	29	NDMM_1::10116, NDMM_1::10117, NDMM_1::10118, NDMM_2::9534, NDMM_2::9535, NDMM_3::7339, NDMM_3::7340, NDMM_3::7341, NDMM_3::7342, LRMM_1::12132, LRMM_1::12133, LRMM_1::12134, LRMM_1::12135, LRMM_2::11369, LRMM_2::11370, LRMM_2::11371, NDMM_4::12341, NDMM_4::12342, NDMM_4::12343, NDMM_4::12344, NDMM_4::12345, LRMM_4::11805, LRMM_4::11806, LRMM_4::11807, LRMM_4::11808, LRMM_4::11809, LRMM_4::11810, …	1477, 7301, 8037, 8453, 9093, 1477, 7461, 7941, 8453, 1477, 7333, 8101, 9189, -1259, 1669, 7397, -891, 1477, 7301, 8565, 9093, -4891, -3739, -2139, -955, 1477, 7333, 8437, 9093	downstream, downstream, downstream, downstream, downstream, downstream, downstream, downstream, downstream, downstream, downstream, downstream, downstream, upstream, downstream, downstream, upstream, downstream, downstream, downstream, downstream, upstream, upstream, upstream, upstream, downstream, downstream, downstream, downstream	1	1	1	1	1	1	0	1	66.571	18.6	32.714	97.429	146.429	46.857	2	136.857	7	LRMM_1	306	Gene MIR5571	MIR5571	microRNA 5571
GeneID:752	FMNL1	17	45221906	45247320	25414	+	24	NDMM_1::6695, NDMM_1::6696, NDMM_1::6697, NDMM_2::6157, NDMM_2::6158, NDMM_2::6159, NDMM_3::4980, LRMM_1::7684, LRMM_1::7685, LRMM_1::7686, LRMM_1::7687, LRMM_2::7481, LRMM_2::7482, LRMM_2::7483, LRMM_2::7484, LRMM_3::5074, LRMM_3::5075, NDMM_4::7812, NDMM_4::7813, NDMM_4::7814, NDMM_4::7815, LRMM_4::7659, LRMM_4::7660, LRMM_4::7661	6446, 7310, 25870, 7374, 25806, 26510, 7150, 2382, 5358, 7022, 26030, 4238, 5358, 7235, 25870, 7150, 25934, 4206, 7342, 25870, 26670, 4302, 7182, 25742	in gene, in gene, downstream, in gene, downstream, downstream, in gene, in gene, in gene, in gene, downstream, in gene, in gene, in gene, downstream, in gene, downstream, in gene, in gene, downstream, downstream, in gene, in gene, downstream	1	1	1	1	1	1	1	1	59.5	55.833	48.167	96.833	104.333	92.333	65.5	136.667	6	LRMM_4	224	Gene FMNL1	FMNL, MGC133052, FMNL1, KW-13, C17orf1B, FHOD4, MGC21878, MGC1894, C17orf1	formin like 1	NM_005892.3, XM_006722069.1, XM_006722062.2, XM_011525179.1, XM_006722063.2, XM_006722064.2, XM_006722065.2, XM_011525180.1, XM_011525181.1, XM_006722066.2, XM_011525182.1, XM_006722070.2		NP_005883.2, XP_006722132.1
GeneID:64853	AIDA	1	222668013	222712901	44888	-	13	NDMM_1::1405, NDMM_2::1430, NDMM_2::1431, NDMM_3::1101, LRMM_1::1865, LRMM_1::1866, LRMM_2::1803, LRMM_3::1282, NDMM_4::1618, NDMM_4::1619, NDMM_4::1620, LRMM_4::1840, LRMM_4::1841	261, 261, -315, 261, 741, 261, 261, 261, 837, 261, -427, 261, -315	in gene, in gene, upstream, in gene, in gene, in gene, in gene, in gene, in gene, in gene, upstream, in gene, upstream	1	1	1	1	1	1	1	1	58	48	37	107.5	101.5	25	59	136.5	2	LRMM_4	226	Gene AIDA	C1orf80, FLJ32421, FLJ12806, AIDA, RP11-378J18.7	axin interactor, dorsalization associated	NM_022831.2, XR_921909.1		NP_073742.2
GeneID:26959	HBP1	7	107168961	107202529	33568	+	10	NDMM_1::15063, NDMM_2::14029, NDMM_3::10753, LRMM_1::17646, LRMM_1::17647, LRMM_2::17196, LRMM_3::11291, NDMM_4::18035, LRMM_4::16873, LRMM_4::16874	-161, -481, -193, -161, 735, -193, -193, -161, -193, 719	upstream, upstream, upstream, upstream, in gene, upstream, upstream, upstream, upstream, in gene	1	1	1	1	1	1	1	1	109	60	45.5	140	245.5	76.5	44.5	136.5	2	LRMM_1	345	Gene HBP1	FLJ16340, HBP1	HMG-box transcription factor 1	NM_012257.3, NM_001244262.1, XM_005250266.2, XM_005250267.2, XR_927445.1		NP_036389.2, NP_001231191.1, XP_005250323.1, XP_005250324.1
GeneID:9048	ARTN	1	43931897	43937241	5344	+	11	NDMM_1::415, NDMM_1::416, NDMM_2::415, NDMM_3::295, LRMM_1::513, LRMM_2::471, LRMM_3::331, NDMM_4::417, LRMM_4::492, LRMM_4::493, LRMM_4::494	2311, 14855, 14855, 14855, 14855, 14855, 14823, 14855, 1692, 2343, 14855	in gene, downstream, downstream, downstream, downstream, downstream, downstream, downstream, in gene, in gene, downstream	1	1	1	1	1	1	1	1	57.667	56	36.667	67	110.667	65.667	48.667	136.333	3	LRMM_4	336	Gene ARTN	ARTN, EVN, ENOVIN, NBN	artemin	NM_057090.2, NM_057091.2, NM_001136215.1, XM_006711024.1, XM_011542402.1		NP_476431.2, NP_476432.2, NP_001129687.1, XP_006711087.1
GeneID:105378688	LOC105378688	1	43937892	43940543	2651	-	11	NDMM_1::415, NDMM_1::416, NDMM_2::415, NDMM_3::295, LRMM_1::513, LRMM_2::471, LRMM_3::331, NDMM_4::417, LRMM_4::492, LRMM_4::493, LRMM_4::494	6335, -6209, -6209, -6209, -6209, -6209, -6177, -6209, 6954, 6303, -6209	downstream, upstream, upstream, upstream, upstream, upstream, upstream, upstream, downstream, downstream, upstream	1	1	1	1	1	1	1	1	57.667	56	36.667	67	110.667	65.667	48.667	136.333	3	LRMM_4	336	Gene LOC105378688		uncharacterized LOC105378688	XR_957246.1, XR_947283.1
GeneID:6166	RPL36AL	14	49618688	49620685	1997	-	8	NDMM_1::4508, NDMM_2::4403, NDMM_3::3474, LRMM_1::5355, LRMM_2::5230, LRMM_3::3539, NDMM_4::5348, LRMM_4::5302	125, 109, 269, -83, 125, 93, 109, 205	in gene, in gene, in gene, upstream, in gene, in gene, in gene, in gene	1	1	1	1	1	1	1	1	128	45	74	169	140	80	66	136	1	NDMM_4	169	Gene RPL36AL	MGC111574, RPL36A, RPL36AL	ribosomal protein L36a like	NM_001001.4		NP_000992.1
GeneID:4247	MGAT2	14	49620771	49623481	2710	+	8	NDMM_1::4508, NDMM_2::4403, NDMM_3::3474, LRMM_1::5355, LRMM_2::5230, LRMM_3::3539, NDMM_4::5348, LRMM_4::5302	-211, -195, -355, -3, -211, -179, -195, -291	upstream, upstream, upstream, upstream, upstream, upstream, upstream, upstream	1	1	1	1	1	1	1	1	128	45	74	169	140	80	66	136	1	NDMM_4	169	Gene MGAT2	CDG2A, MGAT2, GLCNACTII, CDGS2, GNT-II, GNT2	mannosyl (alpha-1,6-)-glycoprotein beta-1,2-N-acetylglucosaminyltransferase	NM_002408.3		NP_002399.1
GeneID:56984	PSMG2	18	12658739	12725740	67001	+	9	NDMM_1::7107, NDMM_2::6565, NDMM_3::5260, LRMM_1::8271, LRMM_2::7976, LRMM_2::7977, LRMM_3::5386, NDMM_4::8323, LRMM_4::8291	44045, 44045, 44205, 44045, 43501, 44205, 44077, 44077, 44205	in gene, in gene, in gene, in gene, in gene, in gene, in gene, in gene, in gene	1	1	1	1	1	1	1	1	87	61	45	114	130	76	66	136	1	LRMM_4	136	Gene PSMG2	TNFSF5IP1, MDS003, HsT1707, CLAST3, HCCA3, PAC2, MGC15092, PSMG2	proteasome (prosome, macropain) assembly chaperone 2	NM_147163.1, NM_020232.4		NP_671692.1, NP_064617.2
GeneID:79959	CEP76	18	12661750	12702777	41027	-	9	NDMM_1::7107, NDMM_2::6565, NDMM_3::5260, LRMM_1::8271, LRMM_2::7976, LRMM_2::7977, LRMM_3::5386, NDMM_4::8323, LRMM_4::8291	-7, -7, -167, -7, 537, -167, -39, -39, -167	upstream, upstream, upstream, upstream, in gene, upstream, upstream, upstream, upstream	1	1	1	1	1	1	1	1	87	61	45	114	130	76	66	136	1	LRMM_4	136	Gene CEP76	FLJ12542, CEP76, HsT1705, C18orf9	centrosomal protein 76kDa	NM_024899.3, NM_001271989.1, NR_073537.1, XM_005258149.3		NP_079175.2, NP_001258918.1
GeneID:132949	AASDH	4	56337687	56389418	51731	-	8	NDMM_1::11834, NDMM_2::11177, NDMM_3::8542, LRMM_1::14071, LRMM_2::13383, LRMM_3::9005, NDMM_4::14256, LRMM_4::13584	2122, 2106, 2058, 2122, 2154, 2314, 2122, 2122	in gene, in gene, in gene, in gene, in gene, in gene, in gene, in gene	1	1	1	1	1	1	1	1	104	80	76	126	195	147	54	136	1	LRMM_1	195	Gene AASDH	ACSF4, NRPS998, LYS2, NRPS1098, AASDH	aminoadipate-semialdehyde dehydrogenase	NM_001286670.1, NM_181806.3, NM_001286668.1, NM_001286672.1, NM_001286671.1, NM_001286669.1, XM_005265721.2, XM_011534373.1, XM_005265724.3, XM_005265726.3, XM_005265727.2		NP_001273599.1, NP_861522.2, NP_001273597.1, NP_001273601.1, NP_001273600.1, NP_001273598.1
GeneID:10263	CDK2AP2	11	67506490	67508728	2238	-	15	NDMM_1::2736, NDMM_1::2737, NDMM_2::2733, NDMM_3::2148, NDMM_3::2149, LRMM_1::3441, LRMM_2::3317, LRMM_2::3318, LRMM_3::2233, LRMM_3::2234, LRMM_3::2235, NDMM_4::3253, NDMM_4::3254, LRMM_4::3324, LRMM_4::3325	2584, 216, 184, 2584, 173, 216, 2648, 168, 2584, 728, 216, 2584, 216, 2616, 216	downstream, in gene, in gene, downstream, in gene, in gene, downstream, in gene, downstream, in gene, in gene, downstream, in gene, downstream, in gene	1	1	1	1	1	1	1	1	66.5	60.5	42	90.5	132.5	58	53.5	136	2	LRMM_1	216	Gene CDK2AP2	FLJ10636, CDK2AP2, DOC-1R, p14	cyclin-dependent kinase 2 associated protein 2	NM_005851.4, NM_001271849.1, NR_073484.1		NP_005842.1, NP_001258778.1
GeneID:64493	LINC00235	16	526847	527407	560	-	8	NDMM_1::5862, NDMM_2::5245, NDMM_3::4219, LRMM_1::6535, LRMM_2::6350, LRMM_3::4333, NDMM_4::6615, LRMM_4::6569	-97, -209, -97, -81, -1, 111, -145, -113	upstream, upstream, upstream, upstream, upstream, in gene, upstream, upstream	1	1	1	1	1	1	1	1	57	87	42	113	100	78	51	136	1	LRMM_4	136	Gene LINC00235	LA16c-356B8.1, NCRNA00235, C16orf10, LINC00235	long intergenic non-protein coding RNA 235	NR_024121.1
GeneID:6650	CAPN15	16	527756	554636	26880	+	8	NDMM_1::5862, NDMM_2::5245, NDMM_3::4219, LRMM_1::6535, LRMM_2::6350, LRMM_3::4333, NDMM_4::6615, LRMM_4::6569	-252, -140, -252, -268, -348, -460, -204, -236	upstream, upstream, upstream, upstream, upstream, upstream, upstream, upstream	1	1	1	1	1	1	1	1	57	87	42	113	100	78	51	136	1	LRMM_4	136	Gene CAPN15	CAPN15, SOLH, MGC131491	calpain 15	NM_005632.2, XM_011522619.1, XM_011522620.1, XM_011522621.1, XM_011522622.1, XM_011522623.1, XM_011522624.1, XM_011522625.1, XM_011522626.1, XM_011522627.1, XM_011522628.1, XM_011522629.1, XM_011522630.1, XM_011522631.1, XM_011522632.1		NP_005623.1
[truncated: 21,671 more rows]
