# Supplementary material for: Epigenetic Plasticity Drives Carcinogenesis and Multi-Therapy Resistance in Multiple Myeloma
Source: Research Square preprint supplement (doi:10.21203/rs.3.rs-6306816/v1), 2025-04-15
Supplement: Supplementary file 9 [file 7bc52549941f17420e54a122.xlsx]

## Sheet: MGUS_vs_SMM
GENE	Mean_Diff_zScore_(SMM-MGUS)	p_value	q_value	Minus_Log(q_value)
FAM133A	1.14989	7.80389e-14	1.30621e-09	8.88399
HIST1H3I	-0.785959	4.40785e-11	2.45929e-07	6.60919
MAGEC1	0.962666	3.30008e-11	2.76183e-07	6.5588
NLRP7	-0.894589	1.83409e-10	7.67477e-07	6.11493
CLEC17A	-0.851419	5.61308e-10	1.87904e-06	5.72606
CD81	-0.769391	7.9782e-10	2.22565e-06	5.65254
TDRD9	-0.914401	1.0542e-09	2.52074e-06	5.59847
HIST1H2BL	-0.713872	1.40052e-09	2.93023e-06	5.5331
KCNMA1	-0.74697	4.05843e-09	7.54779e-06	5.12218
MAGEC2	0.849902	7.01807e-09	1.17468e-05	4.93008
HIST1H1B	-0.738685	1.1102e-08	1.54854e-05	4.81008
CORO2B	-0.861592	1.07187e-08	1.63099e-05	4.78755
HIST1H3C	-0.671078	2.0962e-08	2.33908e-05	4.63096
SHD	-1.07616	2.02358e-08	2.41933e-05	4.61631
HIST1H2AB	-0.572281	1.90357e-08	2.45093e-05	4.61067
HIST1H2AL	-0.653963	2.5174e-08	2.4786e-05	4.60579
RET	-0.969874	2.67678e-08	2.4891e-05	4.60396
CD19	-0.669994	2.4096e-08	2.52074e-05	4.59847
IGSF6	-0.786713	3.26144e-08	2.7295e-05	4.56392
FFAR3	-0.841589	3.4979e-08	2.78799e-05	4.55471
CTTNBP2NL	-0.77862	3.22792e-08	2.84363e-05	4.54613
SWAP70	-0.783665	5.08227e-08	3.86669e-05	4.41266
ITPRIPL2	-0.71971	7.18746e-08	4.62706e-05	4.33469
LPAR5	-0.881902	6.35901e-08	4.6277e-05	4.33463
CDH9	0.877047	7.16426e-08	4.79662e-05	4.31906
IRF8	-0.794757	6.98516e-08	4.87157e-05	4.31233
FSTL5	0.673686	7.90729e-08	4.90193e-05	4.30963
RFTN1	-0.693031	8.70197e-08	5.20192e-05	4.28384
ENTPD1	-0.771098	9.07524e-08	5.23798e-05	4.28084
CD248	-0.761198	9.72074e-08	5.42352e-05	4.26572
HLA-DPA1	-0.746873	1.042e-07	5.62613e-05	4.24979
HIST1H4A	-0.781221	1.10978e-07	5.80482e-05	4.23621
FABP3	-0.616222	1.36106e-07	6.90347e-05	4.16093
CMKLR1	-0.688453	1.50001e-07	7.17346e-05	4.14427
HIST1H3F	-0.659532	1.54457e-07	7.18138e-05	4.14379
CTSH	-0.801576	1.46551e-07	7.2146e-05	4.14179
HMOX1	-0.778795	1.60995e-07	7.28305e-05	4.13769
SPSB4	-0.956956	1.76877e-07	7.4014e-05	4.13069
PLBD1	-0.752561	1.75456e-07	7.53023e-05	4.12319
CD24	-0.67626	1.71739e-07	7.56464e-05	4.12121
HIST1H2BB	-0.535198	1.9466e-07	7.94686e-05	4.0998
CD22	-0.648103	2.05168e-07	8.17645e-05	4.08744
NPL	-0.736649	2.17064e-07	8.44935e-05	4.07318
PLA2G7	-0.615624	2.53879e-07	8.49884e-05	4.07064
SESN3	-0.73661	2.53735e-07	8.66738e-05	4.06211
C1QA	-0.749212	2.39188e-07	8.70332e-05	4.06032
KIF26A	-0.807196	2.44617e-07	8.71147e-05	4.05991
MME	-0.574632	2.52319e-07	8.79858e-05	4.05559
GNG2	-0.6011	2.3765e-07	8.83952e-05	4.05357
SPIC	-0.657925	2.70039e-07	8.86258e-05	4.05244
ATP9A	-0.722889	2.33584e-07	8.88576e-05	4.05131
MTDH	0.802454	2.90435e-07	9.34864e-05	4.02925
SIGLEC9	-0.598697	3.2742e-07	9.78635e-05	4.00938
HNMT	-0.742114	3.10029e-07	9.79108e-05	4.00917
HIST1H3H	-0.6452	3.42245e-07	9.87672e-05	4.00539
CCL23	-0.895129	3.25774e-07	9.91419e-05	4.00374
HIST1H3B	-0.678519	3.61599e-07	9.92205e-05	4.0034
TCL1A	-0.777391	3.5667e-07	9.94992e-05	4.00218
HIST1H2BE	-0.584498	3.21339e-07	9.96031e-05	4.00173
BLVRB	-0.643424	3.40934e-07	0.000100115	3.9995
AIF1	-0.689089	3.72781e-07	0.000100639	3.99723
VSIG4	-0.698287	4.02854e-07	0.000100641	3.99722
NXN	-0.761537	3.55441e-07	0.000100837	3.99638
FUT1	-0.806832	3.87983e-07	0.00010147	3.99366
CAVIN1	-0.722074	4.02379e-07	0.000102046	3.9912
CD72	-0.764365	4.32888e-07	0.000102052	3.99118
FUT7	-0.759168	3.97859e-07	0.000102452	3.98948
GFRA2	-0.681839	4.16947e-07	0.00010263	3.98872
RAB32	-0.586985	4.30591e-07	0.00010296	3.98733
GPR65	-0.683812	3.87939e-07	0.000103069	3.98687
SERPINF1	-0.572018	4.51148e-07	0.000103443	3.9853
FSCN1	-0.694808	4.28042e-07	0.000103834	3.98366
FOLR2	-0.741899	4.48405e-07	0.000104242	3.98196
RAB20	-0.664587	4.67523e-07	0.000104339	3.98155
TUBA1A	-0.750839	4.7576e-07	0.00010478	3.97972
CCL14	-0.644318	4.88697e-07	0.000104869	3.97935
RNASE3	-0.717102	4.63728e-07	0.00010489	3.97926
VPREB1	-0.812604	4.8779e-07	0.000106034	3.97455
IGFBP5	-0.819509	5.11353e-07	0.000108342	3.9652
WDR86	-0.799431	5.23839e-07	0.0001096	3.96019
ACSM5	-0.670484	5.33471e-07	0.000110238	3.95767
WDFY4	-0.7303	5.49087e-07	0.000112081	3.95047
MS4A7	-0.656088	5.5914e-07	0.000112758	3.94785
UST	-0.799696	5.81571e-07	0.000114522	3.94111
STAT5B	-0.714728	5.90187e-07	0.000114867	3.93981
FCGR3A	-0.68202	5.78533e-07	0.00011528	3.93825
LIMCH1	-0.706728	6.31056e-07	0.000121409	3.91575
VCAM1	-0.721549	6.48628e-07	0.000121986	3.91369
BEND4	-0.79381	6.56402e-07	0.000122076	3.91337
HIST1H2AH	-0.493966	6.43705e-07	0.000122436	3.91209
ACE	-0.746006	6.77747e-07	0.000124661	3.90427
NIBAN3	-0.767634	7.4886e-07	0.000127902	3.89312
HIST1H2BM	-0.463395	7.41724e-07	0.000127989	3.89283
CHRDL1	-0.749924	7.63861e-07	0.000129147	3.88892
HIST1H3J	-0.486606	7.41207e-07	0.000129232	3.88863
SDC3	-0.700465	7.34241e-07	0.000129366	3.88818
APOC1	-0.739677	7.11733e-07	0.000129489	3.88777
SLC43A3	-0.541437	7.2139e-07	0.000129835	3.88661
ZNF507	0.627052	7.3394e-07	0.000130688	3.88376
MSLN	-0.828298	7.89388e-07	0.00013082	3.88333
TOX2	-0.694943	7.81933e-07	0.00013088	3.88313
FABP5	-0.584191	8.09874e-07	0.000132899	3.87648
CXCR5	-0.850032	8.27348e-07	0.000134448	3.87145
PRG3	-0.810159	8.53056e-07	0.000135985	3.86651
SLA	-0.70517	8.51411e-07	0.000137028	3.86319
DPEP2	-0.589349	8.80886e-07	0.000139097	3.85668
AP000781.2	-0.749474	9.00174e-07	0.000140814	3.85135
S100A8	-0.730846	9.98212e-07	0.000154704	3.8105
SIGLEC7	-0.717019	1.01752e-06	0.000154829	3.81015
UBASH3B	-0.794225	1.0274e-06	0.000154924	3.80988
HCK	-0.715753	1.03798e-06	0.000155122	3.80933
SELENBP1	-0.565063	1.01351e-06	0.000155634	3.8079
PYGL	-0.713762	1.06523e-06	0.000157785	3.80193
KCNJ2	-0.661423	1.09688e-06	0.000161049	3.79304
GNGT2	-0.621063	1.12461e-06	0.000163685	3.78599
RIN3	-0.730812	1.1825e-06	0.000167735	3.77538
COL18A1	-0.725914	1.17774e-06	0.000168488	3.77343
ARHGAP5	0.725437	1.17248e-06	0.000169181	3.77165
HP	-0.738786	1.22631e-06	0.000172487	3.76324
RHBDD2	0.654826	1.24184e-06	0.000173216	3.76141
HIST1H2BO	-0.577511	1.26449e-06	0.000174917	3.75717
AEN	0.660092	1.29213e-06	0.000175835	3.75489
CXCL12	-0.690838	1.28588e-06	0.000176418	3.75346
CLEC4D	-0.727253	1.31201e-06	0.0001771	3.75178
COTL1	-0.704689	1.32731e-06	0.000177733	3.75023
GPRC5B	-0.806036	1.34438e-06	0.000178589	3.74815
CETP	-0.679928	1.37641e-06	0.000178592	3.74814
DSC2	-0.637324	1.37406e-06	0.00017968	3.7455
CD14	-0.763406	1.40644e-06	0.000179702	3.74545
DNASE1L3	-0.722265	1.40123e-06	0.000180414	3.74373
TMSB4X	-0.745493	1.36928e-06	0.000180465	3.74361
SLC2A3	-0.746297	1.54798e-06	0.000183759	3.73575
GPR132	-0.696092	1.57259e-06	0.00018407	3.73502
DOK2	-0.707886	1.61953e-06	0.000184407	3.73422
CD163	-0.717327	1.56599e-06	0.000184588	3.7338
FAM124B	-0.816205	1.54782e-06	0.000185053	3.7327
S100A9	-0.707228	1.59586e-06	0.000185496	3.73167
CD82	-0.604224	1.61807e-06	0.000185501	3.73165
PDE6G	-0.705087	1.46317e-06	0.000185534	3.73158
ACSL1	-0.700287	1.61074e-06	0.000185935	3.73064
MCEMP1	-0.73662	1.54647e-06	0.000186222	3.72997
TET1	0.616529	1.51997e-06	0.000187069	3.728
UAP1	0.519471	1.4874e-06	0.000187188	3.72772
OR52H1	0.724474	1.51021e-06	0.000187244	3.72759
LRP4	-0.827023	1.54398e-06	0.000187269	3.72753
RHAG	-0.525728	1.50006e-06	0.000187373	3.72729
RRAD	-0.804784	1.5401e-06	0.000188162	3.72547
GPR153	-0.779039	1.72677e-06	0.000195288	3.70932
C1orf162	-0.69465	1.74599e-06	0.000196136	3.70744
MAGEC3	0.789873	1.82189e-06	0.000200623	3.69762
MYO1G	-0.703452	1.81162e-06	0.000200813	3.69721
NID1	-0.648495	1.80686e-06	0.000201621	3.69546
ALOX15	-0.769658	1.96011e-06	0.000214433	3.66871
MS4A6A	-0.664722	1.97656e-06	0.000214829	3.66791
ZNF257	-0.697256	2.03948e-06	0.000216056	3.66543
CD36	-0.622404	2.03897e-06	0.000217377	3.66279
CCL13	-0.77826	2.02166e-06	0.000218313	3.66092
COL19A1	-0.632524	2.03512e-06	0.000218358	3.66083
MGLL	-0.593318	2.07518e-06	0.000218455	3.66064
EPX	-0.716198	2.11106e-06	0.000220843	3.65592
S100A12	-0.745907	2.14266e-06	0.000221381	3.65486
ALDH1A1	-0.589375	2.19597e-06	0.000221422	3.65478
ZDHHC14	0.607385	2.16447e-06	0.000222263	3.65313
BMP6	0.699567	2.1399e-06	0.00022247	3.65273
DPYSL2	-0.800827	2.19464e-06	0.00022263	3.65242
GABRG2	0.613239	2.19239e-06	0.000223758	3.65022
ZNF90	-0.750845	2.23253e-06	0.000223761	3.65021
EBF1	-0.599308	2.26255e-06	0.00022542	3.64701
VNN1	-0.654546	2.27981e-06	0.000225796	3.64628
ARHGAP24	-0.689781	2.35507e-06	0.000227856	3.64234
VSIG10	-0.773817	2.35105e-06	0.00022879	3.64056
A2M	-0.749963	2.33971e-06	0.000229018	3.64013
FNDC4	-0.81938	2.33958e-06	0.000230353	3.63761
CRYBG1	-0.699704	2.49808e-06	0.00023101	3.63637
RAB42	-0.679699	2.49032e-06	0.000231572	3.63531
HIP1	-0.694353	2.5502e-06	0.000231985	3.63454
IL10RA	-0.697045	2.56686e-06	0.000232238	3.63407
TSPAN18	-0.637949	2.48453e-06	0.000232324	3.63391
RPS6KA1	-0.75686	2.52678e-06	0.00023238	3.6338
LCP2	-0.724273	2.43009e-06	0.000232428	3.63371
RUBCNL	-0.662669	2.41663e-06	0.000232469	3.63364
C1QC	-0.693022	2.54365e-06	0.000232654	3.63329
SIGLEC10	-0.761455	2.48015e-06	0.000233218	3.63224
CLDN5	-0.797331	2.60765e-06	0.000233406	3.63189
TNFRSF18	-0.601648	2.59743e-06	0.00023374	3.63127
IL21R	-0.684673	2.46178e-06	0.000234121	3.63056
STRBP	0.612614	2.47834e-06	0.000234364	3.63011
VENTX	-0.794148	2.71497e-06	0.00024044	3.61899
OLFML3	-0.736506	2.70953e-06	0.000241234	3.61756
NOD2	-0.542325	2.75878e-06	0.000243034	3.61433
SCN1B	-0.702193	2.82521e-06	0.000246294	3.60855
ADGRE3	-0.636628	2.8213e-06	0.000247241	3.60688
NLRC4	-0.665174	2.87003e-06	0.000247621	3.60621
C1QB	-0.711395	2.86913e-06	0.000248826	3.6041
DEK	-0.699994	3.03245e-06	0.000255061	3.59336
PPAT	0.464704	3.02693e-06	0.000255883	3.59196
HCST	-0.761582	3.06211e-06	0.000256268	3.59131
BACE1	-0.729008	3.02277e-06	0.000256828	3.59036
KCTD15	-0.678364	3.01561e-06	0.000257527	3.58918
ATP11B	0.685418	3.00501e-06	0.000257938	3.58849
CD4	-0.678406	3.11745e-06	0.000259601	3.58569
PLXND1	-0.715669	3.13817e-06	0.000260033	3.58497
STXBP1	-0.569866	3.16013e-06	0.000260563	3.58409
SLC40A1	-0.643332	3.27569e-06	0.000268767	3.57062
LILRA2	-0.646037	3.30259e-06	0.000269652	3.5692
PID1	-0.612875	3.33708e-06	0.000271146	3.5668
APOE	-0.741201	3.41462e-06	0.000276106	3.55892
ANGPTL4	-0.715809	3.46184e-06	0.000278579	3.55505
FYB1	-0.703474	3.61975e-06	0.000280497	3.55207
SMAD5	0.464712	3.60658e-06	0.000280776	3.55164
CPXM1	-0.672305	3.54818e-06	0.000281466	3.55057
HIST1H4I	-0.655538	3.60581e-06	0.000282028	3.54971
RAB3IL1	-0.612944	3.65928e-06	0.000282253	3.54936
GPR89A	0.414133	3.59514e-06	0.000282514	3.54896
FPR1	-0.648797	3.54669e-06	0.000282688	3.54869
FABP4	-0.596169	3.58364e-06	0.000282938	3.54831
NCF2	-0.697465	3.53685e-06	0.000283253	3.54783
CCDC68	-0.78378	3.87016e-06	0.000295794	3.52901
CRISPLD2	-0.663269	3.86659e-06	0.000296876	3.52743
CYP1B1	-0.67575	4.01604e-06	0.000304165	3.51689
CDC20	-0.583797	4.00241e-06	0.00030451	3.5164
GNA15	-0.636579	4.05915e-06	0.000306045	3.51421
S1PR3	-0.7622	4.10978e-06	0.000308473	3.51078
SLC19A3	-0.837536	4.14425e-06	0.000309672	3.5091
KBTBD11	-0.893609	4.1966e-06	0.00031219	3.50558
SLC25A36	0.50881	4.28568e-06	0.000316007	3.5003
TSPAN2	-0.767803	4.27012e-06	0.000316253	3.49997
SAT1	-0.743526	4.37524e-06	0.000317025	3.49891
ASGR2	-0.729757	4.35835e-06	0.000317174	3.4987
CLC	-0.699047	4.35026e-06	0.000317968	3.49762
LST1	-0.609011	4.4083e-06	0.000318043	3.49751
BIVM	-0.747846	4.33587e-06	0.000318306	3.49715
CDCP1	-0.755176	4.44036e-06	0.000318982	3.49623
EGFL7	-0.69709	4.61701e-06	0.000324704	3.48851
ITGB2	-0.708365	4.60875e-06	0.000325491	3.48746
POMGNT1	0.633426	4.65039e-06	0.000325683	3.48721
PKLR	-0.748804	4.5963e-06	0.000325987	3.4868
CARMIL1	0.630026	4.58565e-06	0.000326615	3.48596
LCP1	-0.643947	4.57028e-06	0.000326911	3.48557
RGS10	-0.775516	4.72578e-06	0.000329584	3.48203
FRY	-0.750162	4.76763e-06	0.000329754	3.48181
APOL4	-0.709195	4.75422e-06	0.000330191	3.48123
ZFYVE9	0.585434	4.8851e-06	0.00033511	3.47481
ETS2	-0.628143	4.88465e-06	0.000336458	3.47307
ZNF366	-0.677707	4.93166e-06	0.000336923	3.47247
BMP8B	0.577099	5.00717e-06	0.000339312	3.4694
CD320	0.55175	4.99032e-06	0.000339544	3.4691
EPHB6	-0.615594	5.11028e-06	0.000343518	3.46405
LILRA5	-0.726318	5.09634e-06	0.000343962	3.46349
FMO2	-0.769789	5.16007e-06	0.000344101	3.46331
TIMD4	-0.591472	5.14598e-06	0.000344533	3.46277
GSN	-0.717993	5.31267e-06	0.000352871	3.45238
TYROBP	-0.653511	5.3747e-06	0.00035558	3.44906
HCAR3	-0.742579	5.50321e-06	0.000362649	3.44051
MESD	0.524189	5.54208e-06	0.000363778	3.43916
INSYN1	-0.829623	5.5891e-06	0.000365431	3.43719
MAGEB18	0.466776	5.63822e-06	0.000367209	3.43509
HIST1H3G	-0.608888	5.78302e-06	0.000375179	3.42576
TBC1D4	-0.612342	5.84675e-06	0.000377849	3.42268
EIF2AK3	0.617901	5.93368e-06	0.000381992	3.41795
DHRS3	-0.670712	6.0039e-06	0.000382104	3.41782
CA1	-0.514929	6.00119e-06	0.000383389	3.41636
LAIR1	-0.628679	5.993e-06	0.000384333	3.41529
FGFR2	-0.715586	6.28205e-06	0.000393816	3.40471
RIOX2	0.49582	6.2362e-06	0.000393893	3.40462
AXL	-0.660817	6.21578e-06	0.00039409	3.4044
GPRC5D	0.606768	6.26635e-06	0.000394309	3.40416
CCDC170	-0.712028	6.50796e-06	0.000406456	3.39099
IGLL5	-0.637097	6.58327e-06	0.000408114	3.38922
CTBP2	-0.681881	6.57304e-06	0.000408995	3.38828
MPP1	-0.579433	6.68361e-06	0.000412805	3.38425
MAFB	-0.676301	6.76695e-06	0.000413376	3.38365
SLC28A3	-0.787972	6.73616e-06	0.000414521	3.38245
MFHAS1	-0.564168	6.76222e-06	0.000414601	3.38237
ZNF827	0.690675	6.97438e-06	0.000418413	3.37839
GRK3	-0.586981	6.92959e-06	0.000418727	3.37807
DNAJC1	0.676729	6.88402e-06	0.000418999	3.37779
SLC29A2	-0.707079	6.91977e-06	0.000419649	3.37711
CEBPA	-0.660189	6.97349e-06	0.000419864	3.37689
TNFSF9	-0.741969	7.05928e-06	0.000421994	3.37469
SCIMP	-0.722157	7.23514e-06	0.000426414	3.37017
RGMA	-0.793588	7.16041e-06	0.000426516	3.37007
SERPINB10	-0.649468	7.21552e-06	0.000426761	3.36982
FEZ1	-0.592587	7.20045e-06	0.00042738	3.36919
FCER1G	-0.675072	7.28205e-06	0.000427674	3.36889
DLGAP3	-0.759989	7.41023e-06	0.000432169	3.36435
MRVI1	-0.764925	7.38468e-06	0.000432185	3.36433
PLEKHG1	-0.636541	7.54135e-06	0.000436772	3.35975
IGLL1	-0.573806	7.52064e-06	0.000437085	3.35943
GAS7	-0.728708	7.62476e-06	0.00044008	3.35647
SLC1A3	-0.567006	7.75737e-06	0.00044315	3.35345
KITLG	-0.661756	7.70937e-06	0.000443434	3.35317
DAB2	-0.618475	7.74839e-06	0.000444153	3.35247
CCL2	-0.670392	7.88524e-06	0.000448922	3.34783
PMP22	-0.709558	7.95028e-06	0.000449567	3.34721
TMEM150B	-0.683865	7.93031e-06	0.000449958	3.34683
KDR	-0.660719	7.99202e-06	0.000450405	3.3464
CD93	-0.686331	8.26888e-06	0.000458293	3.33886
LAMC3	-0.759123	8.25841e-06	0.000459233	3.33797
P2RY13	-0.642812	8.21838e-06	0.000460065	3.33718
LRG1	-0.674721	8.25425e-06	0.000460532	3.33674
ASGR1	-0.730524	8.20211e-06	0.000460694	3.33659
CHI3L1	-0.677931	8.4598e-06	0.000467327	3.33038
PRR5L	-0.614027	8.78904e-06	0.000483917	3.31523
ATP5F1D	0.64814	8.97531e-06	0.000492553	3.30755
LGALS9	-0.625011	9.16846e-06	0.000499875	3.30114
ADAP2	-0.605042	9.152e-06	0.000500609	3.3005
SNCA	-0.48574	9.2431e-06	0.000500683	3.30044
HIST1H2AM	-0.512005	9.22951e-06	0.00050157	3.29967
HIST1H2AI	-0.532072	9.29683e-06	0.000501969	3.29932
IGF2BP3	-0.604949	9.42675e-06	0.000505721	3.29609
SLC37A2	-0.641846	9.46717e-06	0.000506267	3.29562
ARAP3	-0.675892	9.42249e-06	0.000507118	3.29489
ABLIM3	-0.583942	9.59196e-06	0.00050807	3.29408
MAN1A2	0.562506	9.57972e-06	0.000509033	3.29325
TNIK	-0.671061	9.66445e-06	0.000510295	3.29218
RASGRP2	-0.712261	9.575e-06	0.000510402	3.29209
NFE2	-0.618627	9.71317e-06	0.000511255	3.29136
KCNE3	-0.61867	9.77028e-06	0.000512648	3.29018
LFNG	-0.639542	9.80622e-06	0.000512926	3.28994
COL6A2	-0.600527	9.92025e-06	0.000517274	3.28628
FTL	-0.656169	1.02516e-05	0.000529603	3.27605
PREX1	-0.69851	1.02033e-05	0.00053038	3.27541
PLAUR	-0.651804	1.02994e-05	0.000530437	3.27537
CD99	-0.600202	1.02511e-05	0.000531218	3.27473
IPCEF1	-0.673131	1.03936e-05	0.000533643	3.27275
AFAP1L2	-0.652556	1.04958e-05	0.000537242	3.26983
GAPT	-0.573537	1.06291e-05	0.000540761	3.26699
ZNF516	-0.662944	1.05972e-05	0.00054078	3.26698
NDNF	0.638038	1.07291e-05	0.000540913	3.26687
LYVE1	-0.551915	1.06863e-05	0.000542023	3.26598
GPR137B	-0.571015	1.07209e-05	0.000542134	3.26589
MAP3K8	-0.606838	1.08212e-05	0.000543921	3.26446
TNFAIP8L2	-0.685907	1.08679e-05	0.000544633	3.2639
TFCP2L1	-0.719336	1.10377e-05	0.000551492	3.25846
LILRB2	-0.653722	1.11349e-05	0.000553043	3.25724
NR1D2	0.646338	1.11843e-05	0.000553853	3.25661
PPARG	-0.513269	1.11318e-05	0.000554536	3.25607
F13A1	-0.645797	1.1408e-05	0.000563268	3.24928
TMIGD3	-0.644198	1.14445e-05	0.000563407	3.24918
LMO2	-0.676326	1.16797e-05	0.000568299	3.24542
AC117457.1	0.730129	1.15822e-05	0.000568513	3.24526
LEF1	-0.550108	1.16434e-05	0.000569846	3.24424
MDM2	0.572769	1.16791e-05	0.000569925	3.24418
CD209	-0.644225	1.19316e-05	0.000575536	3.23993
SLC7A8	-0.588572	1.18634e-05	0.000575562	3.23991
STEAP4	-0.722292	1.19781e-05	0.00057612	3.23949
CLIC3	-0.690219	1.19244e-05	0.000576853	3.23893
ZNF486	-0.617559	1.21776e-05	0.000584035	3.23356
SNX10	-0.588303	1.23345e-05	0.000584856	3.23295
LAMB3	-0.652505	1.23095e-05	0.000585331	3.2326
PSTPIP2	-0.628599	1.23041e-05	0.000586741	3.23155
MEFV	-0.711718	1.22889e-05	0.000587692	3.23085
OXR1	0.609653	1.27626e-05	0.00059339	3.22666
SYTL4	-0.64013	1.27605e-05	0.000594944	3.22552
CAMSAP2	0.574191	1.27047e-05	0.000595661	3.225
PYCARD	-0.708131	1.27512e-05	0.000596174	3.22463
CDC42EP1	-0.659067	1.27028e-05	0.000597247	3.22385
ASB9	-0.719502	1.26862e-05	0.000598145	3.22319
ADAMTS2	-0.629398	1.26663e-05	0.000598893	3.22265
VSTM1	-0.603354	1.29446e-05	0.000600184	3.22172
CD84	-0.536293	1.30168e-05	0.000601865	3.2205
PREX2	-0.701024	1.31346e-05	0.000605639	3.21779
MIA3	0.651425	1.31895e-05	0.000606502	3.21717
PTAFR	-0.598292	1.32786e-05	0.000608926	3.21544
MYO10	-0.664083	1.33868e-05	0.000612207	3.2131
PRICKLE2	0.788699	1.34624e-05	0.000612321	3.21302
NUPR1	-0.695012	1.34506e-05	0.00061345	3.21222
CCL8	-0.660169	1.35328e-05	0.000613852	3.21194
KLF1	-0.51381	1.36062e-05	0.000615514	3.21076
ZEB2	-0.698172	1.36514e-05	0.000615894	3.21049
IL18	-0.641928	1.38859e-05	0.000624793	3.20426
SIRPA	-0.65799	1.41029e-05	0.000632853	3.1987
KCNC3	-0.692445	1.42844e-05	0.000639285	3.19431
ALPK2	-0.612331	1.43523e-05	0.000640611	3.19341
NEFH	-0.68256	1.45363e-05	0.000647096	3.18903
LIPN	-0.700187	1.4968e-05	0.000662789	3.17862
UHRF1	-0.766755	1.49302e-05	0.00066287	3.17857
CMTM3	-0.698599	1.51175e-05	0.000665888	3.1766
CLIP2	-0.578812	1.51085e-05	0.000667244	3.17572
ADAM8	-0.641025	1.54245e-05	0.00067585	3.17015
FLT4	-0.626734	1.53917e-05	0.000676182	3.16994
ARRB1	-0.619893	1.55496e-05	0.000677783	3.16891
COL6A3	-0.669146	1.55135e-05	0.000677976	3.16879
ADGRE2	-0.653479	1.57034e-05	0.000679183	3.16801
KANK1	0.657592	1.56258e-05	0.000679336	3.16792
RIPOR2	-0.625372	1.56783e-05	0.000679853	3.16758
ABCA8	-0.741882	1.59367e-05	0.00068222	3.16608
PTGDS	-0.6697	1.58634e-05	0.000682575	3.16585
PNPLA3	-0.757742	1.59294e-05	0.000683657	3.16516
SPRY2	-0.585247	1.5852e-05	0.000683843	3.16504
PODN	-0.738966	1.62249e-05	0.00068927	3.16161
IRAK3	-0.589521	1.61585e-05	0.000689951	3.16118
MNDA	-0.630977	1.62107e-05	0.00069042	3.16089
NYNRIN	-0.582187	1.66219e-05	0.000697285	3.15659
CDK2AP1	-0.449611	1.65994e-05	0.000698091	3.15609
AFF3	-0.60382	1.65983e-05	0.000699806	3.15502
GLUL	-0.560057	1.65239e-05	0.000700196	3.15478
MYO7A	-0.638203	1.65755e-05	0.000700606	3.15453
VCL	-0.701046	1.68619e-05	0.000705587	3.15145
FGR	-0.677668	1.69413e-05	0.000707139	3.1505
CD68	-0.625396	1.70095e-05	0.000708223	3.14983
PRSS57	-0.716364	1.71312e-05	0.00071152	3.14781
TOP2A	-0.551815	1.72229e-05	0.000713558	3.14657
LEMD3	0.610361	1.74236e-05	0.000720091	3.14261
LRFN2	-0.828717	1.76141e-05	0.00072261	3.1411
SLC16A5	-0.579755	1.76639e-05	0.000722881	3.14093
C5AR1	-0.60532	1.7608e-05	0.000724133	3.14018
JAML	-0.671808	1.75936e-05	0.000725323	3.13947
IL4R	-0.647375	1.80294e-05	0.000732468	3.13521
RILP	-0.477976	1.796e-05	0.000733205	3.13477
BACE2	-0.56901	1.80169e-05	0.000733737	3.13446
NFAM1	-0.693911	1.81779e-05	0.000734933	3.13375
ASAH2	0.686956	1.81524e-05	0.000735677	3.13331
CLU	-0.589962	1.86226e-05	0.000736891	3.1326
FPR3	-0.57881	1.85883e-05	0.000737279	3.13237
LPL	-0.701699	1.8296e-05	0.000737923	3.13199
LRP3	-0.686965	1.83545e-05	0.000738505	3.13165
SMO	-0.656176	1.85818e-05	0.00073877	3.13149
BEST1	-0.672524	1.85681e-05	0.000739982	3.13078
SOBP	-0.594936	1.84386e-05	0.00074011	3.1307
KYNU	-0.577341	1.85551e-05	0.00074123	3.13005
RAB39A	-0.730677	1.85493e-05	0.000742772	3.12914
CSF1R	-0.634102	1.89426e-05	0.000747786	3.12622
GIPC3	-0.755942	1.91868e-05	0.000750346	3.12474
ACTN1	-0.72408	1.90534e-05	0.000750391	3.12471
SLITRK5	0.603426	1.91112e-05	0.000750898	3.12442
PLEKHH2	-0.677098	1.91649e-05	0.000751246	3.12422
CPM	-0.566551	1.92945e-05	0.0007528	3.12332
MRC1	-0.640584	1.93473e-05	0.000753105	3.12314
TUBA1B	-0.518623	1.94359e-05	0.0007548	3.12217
EMC4	0.630385	1.96264e-05	0.000758676	3.11994
NINJ1	-0.568429	1.96244e-05	0.000760354	3.11898
TMEM131L	-0.637961	1.97664e-05	0.000762328	3.11786
PDK4	-0.511641	1.99534e-05	0.00076251	3.11775
ABI3	-0.649651	1.99118e-05	0.000762662	3.11767
ZFP57	-0.768974	1.98714e-05	0.000762859	3.11756
SLC15A3	-0.619842	1.98705e-05	0.000764579	3.11658
LAMB2	-0.543632	2.02067e-05	0.000766939	3.11524
TESC	-0.461555	2.01698e-05	0.000767279	3.11505
CDYL2	-0.564702	2.01611e-05	0.000768692	3.11425
PTPRC	-0.601048	2.05752e-05	0.000777398	3.10936
ANPEP	-0.651628	2.0536e-05	0.000777672	3.1092
SIGLEC8	-0.744147	2.09463e-05	0.000789637	3.10257
FOXP2	0.645023	2.12786e-05	0.000800362	3.09671
CD300LB	-0.670004	2.13268e-05	0.000800378	3.09671
PRG2	-0.627292	2.14358e-05	0.000800876	3.09643
LSR	0.548649	2.1421e-05	0.000802112	3.09576
GPR15	-0.744299	2.16119e-05	0.000803866	3.09482
PLEKHO1	-0.584773	2.15748e-05	0.000804273	3.0946
MS4A3	-0.640139	2.21133e-05	0.000818878	3.08678
PRRT4	-0.745184	2.20697e-05	0.000819075	3.08668
PIK3R6	-0.644309	2.21966e-05	0.000820146	3.08611
CTDSPL	-0.581068	2.24085e-05	0.000824337	3.0839
CLEC2B	-0.522266	2.2386e-05	0.000825325	3.08337
METTL7B	-0.723012	2.25795e-05	0.000828808	3.08155
ATP8B2	0.582534	2.31063e-05	0.000846285	3.07248
FLNA	-0.693035	2.34092e-05	0.000853646	3.06872
VARS	0.56807	2.33954e-05	0.000855005	3.06803
ADD2	-0.568136	2.35528e-05	0.000855156	3.06795
GIMAP4	-0.549375	2.35383e-05	0.000856488	3.06728
WIPI1	0.581705	2.36829e-05	0.00085802	3.0665
TMEM273	-0.612103	2.38941e-05	0.000863801	3.06359
DKK1	0.741404	2.39769e-05	0.000864927	3.06302
DIPK1B	-0.77097	2.43226e-05	0.00087551	3.05774
GLT1D1	-0.729381	2.43832e-05	0.000875807	3.05759
MYO1F	-0.688054	2.44727e-05	0.000877139	3.05693
NTSR1	-0.781017	2.46481e-05	0.000881537	3.05476
HLX	-0.667306	2.47894e-05	0.00088282	3.05413
HIST1H2BH	-0.551738	2.47616e-05	0.00088371	3.05369
LOXL3	-0.765312	2.49824e-05	0.000884048	3.05352
FCGR1A	-0.728203	2.50968e-05	0.000884358	3.05337
KCNMB1	-0.648488	2.49563e-05	0.000884999	3.05306
FBXO27	-0.705831	2.50698e-05	0.000885269	3.05292
THBD	-0.656711	2.4915e-05	0.000885408	3.05286
BTNL8	-0.736566	2.5378e-05	0.000892388	3.04945
FXYD6	-0.609249	2.5576e-05	0.000897465	3.04698
C19orf38	-0.610023	2.57087e-05	0.000898355	3.04655
KCTD12	-0.706491	2.56941e-05	0.000899723	3.04589
IGFBP4	-0.64171	2.59705e-05	0.000905611	3.04306
STAT5A	-0.589174	2.60943e-05	0.000908038	3.0419
ADGRE1	-0.665865	2.62392e-05	0.000909299	3.04129
FRMD4B	-0.669564	2.61931e-05	0.000909585	3.04116
DPEP3	-0.661404	2.64481e-05	0.00091088	3.04054
DNTT	-0.576053	2.64339e-05	0.00091227	3.03988
BMX	-0.723274	2.63955e-05	0.000912825	3.03961
EPB41L3	-0.654108	2.67671e-05	0.000918089	3.03712
FCN1	-0.659925	2.67539e-05	0.000919521	3.03644
SLA2	-0.605109	2.73756e-05	0.000937039	3.02824
C9orf152	0.670273	2.78082e-05	0.000938414	3.02761
ZNF469	-0.532593	2.77687e-05	0.000938975	3.02735
RTN4R	-0.678562	2.79201e-05	0.000940296	3.02674
COX20	0.484291	2.77588e-05	0.00094054	3.02662
CSTA	-0.549845	2.75349e-05	0.000940569	3.02661
ANXA8L1	-0.786245	2.76083e-05	0.000941155	3.02634
PDE9A	-0.640536	2.81486e-05	0.000942302	3.02581
AFAP1L1	-0.631983	2.77579e-05	0.000942417	3.02576
HIST1H4L	-0.488186	2.77286e-05	0.000943337	3.02533
COL22A1	-0.713531	2.81375e-05	0.00094382	3.02511
PPP1R14A	-0.621753	2.81298e-05	0.000945454	3.02436
DOC2B	-0.781389	2.86128e-05	0.000955931	3.01957
PLEKHG3	-0.621658	2.89769e-05	0.000958527	3.0184
SLCO2B1	-0.549339	2.89276e-05	0.000958792	3.01828
IGF2	-0.642525	2.87702e-05	0.000959274	3.01806
ZBTB38	0.691091	2.88936e-05	0.000959566	3.01793
RETREG1	-0.669263	2.88878e-05	0.00096128	3.01715
HBB	-0.559288	2.91576e-05	0.000962603	3.01655
TCN1	-0.67966	2.92427e-05	0.000963513	3.01614
NNMT	-0.62187	2.94149e-05	0.000967284	3.01445
MCTP1	-0.65104	2.97695e-05	0.000971309	3.01264
SHTN1	-0.551423	2.95961e-05	0.000971333	3.01263
SLC22A16	-0.498625	2.97543e-05	0.00097271	3.01202
AHSP	-0.456192	2.971e-05	0.000973161	3.01182
FTH1	-0.603617	2.99473e-05	0.00097521	3.0109
EIF2AK4	0.638538	3.00764e-05	0.000975617	3.01072
NEO1	0.504021	3.00667e-05	0.000977198	3.01002
RASSF2	-0.581069	3.0231e-05	0.000978735	3.00933
UNC13B	0.636673	3.05483e-05	0.000987098	3.00564
HMCES	0.656228	3.09418e-05	0.000997887	3.00092
FCGR3B	-0.59109	3.1286e-05	0.00100511	2.99778
RBP7	-0.562642	3.12552e-05	0.00100606	2.99738
HLA-DMB	-0.585492	3.15231e-05	0.00101079	2.99534
FPR2	-0.568282	3.16036e-05	0.00101144	2.99506
DNAJA4	-0.60491	3.17808e-05	0.00101517	2.99346
TFEC	-0.617186	3.21486e-05	0.00102496	2.98929
ALPL	-0.632146	3.23099e-05	0.00102814	2.98795
CR1	-0.650946	3.23927e-05	0.00102882	2.98766
BST1	-0.609859	3.25773e-05	0.00103077	2.98684
NRP1	-0.5897	3.25366e-05	0.00103143	2.98656
TLR4	-0.60251	3.27253e-05	0.0010335	2.98569
SRPX2	-0.657477	3.31941e-05	0.00104045	2.98278
SERPINA1	-0.645743	3.30191e-05	0.00104082	2.98263
SYNPO	-0.652835	3.3085e-05	0.00104093	2.98258
ZNF208	-0.552036	3.31772e-05	0.00104188	2.98218
CA2	-0.575038	3.34759e-05	0.00104537	2.98073
EDNRB	0.613817	3.34603e-05	0.00104684	2.98012
SH3TC2	-0.714917	3.36316e-05	0.00104828	2.97952
PMP2	-0.806897	3.40416e-05	0.00105712	2.97588
SAMHD1	-0.656504	3.40125e-05	0.00105818	2.97544
TLR2	-0.563621	3.4193e-05	0.00105986	2.97475
HLA-DRA	-0.595542	3.42965e-05	0.0010611	2.97424
LNP1	0.504639	3.44114e-05	0.00106269	2.97359
VASH1	-0.702086	3.45325e-05	0.00106446	2.97287
SPNS3	-0.581074	3.4749e-05	0.00106721	2.97175
RETN	-0.663227	3.4714e-05	0.00106809	2.97139
BTBD11	-0.590451	3.49208e-05	0.00106856	2.9712
TAGLN2	-0.61868	3.48728e-05	0.00106905	2.971
TTC9	-0.520024	3.51471e-05	0.00107157	2.96998
TNFRSF8	-0.640574	3.51335e-05	0.00107311	2.96936
ROGDI	-0.651678	3.56162e-05	0.0010839	2.96501
TMC6	-0.580864	3.58465e-05	0.00108893	2.963
TMED4	0.524452	3.64736e-05	0.00109801	2.95939
NTNG1	-0.693955	3.62227e-05	0.00109836	2.95925
OTOGL	0.769548	3.64205e-05	0.00109839	2.95924
RETSAT	0.530423	3.63983e-05	0.0010997	2.95873
INHBA	-0.682057	3.63746e-05	0.00110097	2.95822
RIMS3	-0.572212	3.67753e-05	0.00110313	2.95737
IFIT2	-0.563617	3.67468e-05	0.00110425	2.95693
HIST1H2AG	-0.554997	3.69469e-05	0.00110629	2.95613
SPATA6	-0.627802	3.70768e-05	0.0011082	2.95538
BCL6	-0.594969	3.74964e-05	0.00111874	2.95127
SLC12A7	-0.611722	3.75758e-05	0.00111912	2.95112
AK5	-0.702448	3.77467e-05	0.00112221	2.94993
CEACAM4	-0.615011	3.82459e-05	0.00113303	2.94576
ERG	-0.6208	3.82166e-05	0.00113417	2.94532
ASB5	0.637591	3.84745e-05	0.00113578	2.94471
ERP27	-0.649095	3.84157e-05	0.00113605	2.9446
GRID2IP	-0.604635	3.87712e-05	0.00114051	2.9429
ANXA1	-0.651022	3.88713e-05	0.00114145	2.94254
MSR1	-0.630993	3.87443e-05	0.00114173	2.94244
CHL1	-0.624989	3.90687e-05	0.00114324	2.94186
TGFBI	-0.593472	3.90234e-05	0.00114391	2.94161
HPGDS	-0.615061	3.91611e-05	0.00114394	2.9416
PEX1	0.519177	3.92985e-05	0.00114595	2.94083
CLTCL1	-0.649699	3.94941e-05	0.00114965	2.93943
TSPAN33	-0.659176	3.96268e-05	0.00115152	2.93873
ABCC3	-0.717931	3.99751e-05	0.00115362	2.93794
TP73	-0.56631	3.97742e-05	0.0011538	2.93787
AURKB	-0.642041	3.99648e-05	0.00115532	2.9373
POLR3B	0.497221	4.01586e-05	0.00115693	2.93669
KRT13	-0.66918	3.9955e-05	0.00115704	2.93665
PCYOX1L	-0.57259	4.04484e-05	0.00115731	2.93655
MPEG1	-0.594353	4.03908e-05	0.00115764	2.93643
PROK2	-0.613478	4.02914e-05	0.00115876	2.93601
URB2	0.561796	4.03694e-05	0.00115901	2.93591
CEBPD	-0.616124	4.05792e-05	0.00115907	2.93589
LRRC25	-0.661441	4.09617e-05	0.001168	2.93256
CDA	-0.557564	4.18229e-05	0.0011785	2.92867
HCAR2	-0.648133	4.18081e-05	0.00118007	2.92809
LILRB5	-0.676464	4.16945e-05	0.00118085	2.9278
CTAG2	0.480146	4.16271e-05	0.00118094	2.92777
PARVG	-0.635537	4.17897e-05	0.00118155	2.92755
NBEA	0.604522	4.15821e-05	0.00118166	2.92751
FOLR3	-0.679638	4.21869e-05	0.00118279	2.92709
FRMD4A	-0.587231	4.15608e-05	0.00118307	2.92699
ZNF385A	-0.610161	4.21604e-05	0.00118403	2.92664
IDUA	0.482636	4.20987e-05	0.00118428	2.92654
CORO2A	-0.642486	4.24917e-05	0.00118934	2.92469
GIMAP6	-0.59668	4.27885e-05	0.00119167	2.92384
AQP9	-0.631175	4.27676e-05	0.00119307	2.92333
ELF5	-0.709519	4.27634e-05	0.00119495	2.92265
RPLP1	0.680456	4.30622e-05	0.0011973	2.9218
PALMD	-0.680101	4.35233e-05	0.00120812	2.91789
TRPV4	-0.545646	4.39425e-05	0.00121773	2.91445
ATP10A	-0.618279	4.43287e-05	0.0012264	2.91137
GFI1B	-0.504101	4.45029e-05	0.00122919	2.91038
GLDN	-0.677055	4.47726e-05	0.00123257	2.90919
CPNE2	-0.624623	4.47238e-05	0.00123326	2.90895
NOL4	0.690209	4.54011e-05	0.00124782	2.90385
HIST1H4F	-0.497123	4.5613e-05	0.00125159	2.90254
APAF1	-0.611263	4.66397e-05	0.00127558	2.89429
CLEC4G	-0.627565	4.65712e-05	0.00127579	2.89422
STK32C	-0.599701	4.69695e-05	0.0012825	2.89194
ACHE	-0.616398	4.70675e-05	0.00128309	2.89174
TCHH	-0.670852	4.71727e-05	0.00128386	2.89148
CDCA7	-0.542089	4.7683e-05	0.00129355	2.88822
HIST1H2BN	-0.559705	4.76401e-05	0.00129448	2.8879
LYZ	-0.608232	4.7949e-05	0.00129866	2.8865
RENBP	-0.661832	4.83413e-05	0.00130296	2.88507
PDGFB	-0.689186	4.81899e-05	0.00130307	2.88503
SLC49A3	-0.605931	4.82871e-05	0.0013036	2.88486
HIST1H2BJ	-0.352395	4.87192e-05	0.00131103	2.88239
BDKRB1	0.546605	4.89949e-05	0.00131422	2.88133
RNASE2	-0.578966	4.89529e-05	0.00131521	2.88101
LILRB3	-0.631397	4.92665e-05	0.0013194	2.87962
TGM2	-0.465586	4.93847e-05	0.00132045	2.87928
ZNF135	-0.589264	4.98956e-05	0.00133198	2.8755
STARD8	-0.531766	5.02476e-05	0.00133924	2.87314
SIRPB2	-0.6587	5.04727e-05	0.0013431	2.87189
KRT23	-0.680887	5.08227e-05	0.00135027	2.86958
ARRDC2	-0.599892	5.10383e-05	0.00135385	2.86843
KCNK17	-0.72792	5.15394e-05	0.00136067	2.86625
EMILIN2	-0.607196	5.16344e-05	0.00136103	2.86613
FES	-0.629744	5.14193e-05	0.0013618	2.86589
PTGR1	-0.563375	5.15382e-05	0.00136279	2.86557
TNFRSF1A	-0.522447	5.22177e-05	0.00136994	2.8633
CASC4	0.549305	5.20571e-05	0.00137002	2.86327
RBPMS2	-0.637493	5.21704e-05	0.00137084	2.86301
LCN2	-0.686099	5.33273e-05	0.0013925	2.8562
GIMAP1-GIMAP5	-0.684271	5.35038e-05	0.00139276	2.85612
LGMN	-0.5978	5.31886e-05	0.00139322	2.85598
FSTL1	-0.633459	5.34438e-05	0.00139337	2.85593
PTPN22	-0.532197	5.3322e-05	0.00139454	2.85557
OLFM4	-0.695038	5.40936e-05	0.00140375	2.85271
HIST1H2BG	-0.462529	5.40217e-05	0.00140406	2.85261
CATSPER1	-0.573169	5.44431e-05	0.00141063	2.85059
EFHD2	-0.613945	5.50788e-05	0.0014227	2.84689
FFAR1	-0.782872	5.5021e-05	0.0014234	2.84667
CIITA	-0.597188	5.63017e-05	0.00144759	2.83936
ENG	-0.567945	5.63912e-05	0.00144766	2.83933
COL5A3	-0.639821	5.61384e-05	0.00144783	2.83928
CYB5D2	0.491823	5.65278e-05	0.00144895	2.83895
DTX4	-0.631153	5.6294e-05	0.00144961	2.83875
CHST6	-0.704574	5.68852e-05	0.00145588	2.83687
PRKCI	0.472931	5.71091e-05	0.00145938	2.83583
SLC4A4	-0.620889	5.75356e-05	0.0014658	2.83393
RAB37	-0.59314	5.74949e-05	0.001467	2.83357
PLCB2	-0.624031	5.83672e-05	0.00148473	2.82835
NCAPH	-0.578522	5.87284e-05	0.00148713	2.82765
PTPRJ	-0.637761	5.86616e-05	0.00148769	2.82749
LTF	-0.681417	5.88597e-05	0.00148821	2.82734
TM6SF1	-0.537855	5.86055e-05	0.00148853	2.82724
SMIM3	-0.533382	5.96717e-05	0.00150193	2.82335
RGL1	-0.593741	5.96181e-05	0.00150284	2.82309
SIGLEC1	-0.631186	5.95979e-05	0.0015046	2.82258
HIST1H2AJ	-0.676674	6.01124e-05	0.00151075	2.82081
HHEX	-0.621734	6.04212e-05	0.00151624	2.81923
RHCE	-0.520151	6.06062e-05	0.0015186	2.81856
MAPRE2	-0.542874	6.0731e-05	0.00151946	2.81831
UBE2E3	0.467982	6.08877e-05	0.0015211	2.81784
GUCY1B1	-0.587467	6.1147e-05	0.0015253	2.81664
PRDM1	0.551936	6.15206e-05	0.00153234	2.81465
CD46	0.661332	6.16497e-05	0.00153327	2.81438
ITGAM	-0.677133	6.27271e-05	0.00155085	2.80943
MS4A4A	-0.58775	6.24612e-05	0.00155115	2.80935
HBEGF	-0.578002	6.26648e-05	0.0015516	2.80922
GRAP2	-0.545772	6.25946e-05	0.00155216	2.80906
GAB1	0.595102	6.28948e-05	0.0015527	2.80891
GARS	0.550649	6.31381e-05	0.00155642	2.80787
Z82206.1	-0.623043	6.39276e-05	0.00157125	2.80375
HBA2	-0.516545	6.40758e-05	0.00157258	2.80339
CD226	-0.644823	6.39077e-05	0.00157307	2.80325
MMP9	-0.643808	6.43682e-05	0.00157744	2.80205
NLRP12	-0.591056	6.48082e-05	0.0015859	2.79972
CNTN5	0.653294	6.57752e-05	0.00158867	2.79897
RDH14	0.544634	6.59024e-05	0.00158945	2.79875
CDH11	-0.683904	6.57127e-05	0.00158945	2.79875
ABI2	0.474325	6.53792e-05	0.00159058	2.79845
MPP7	-0.600441	6.5476e-05	0.00159062	2.79843
CD80	-0.682086	6.51923e-05	0.00159066	2.79842
INHBE	0.594991	6.55928e-05	0.00159115	2.79829
PADI4	-0.638128	6.51191e-05	0.00159119	2.79828
LY6G6F	-0.63559	6.56986e-05	0.00159141	2.79822
LIMA1	-0.547364	6.53512e-05	0.00159221	2.798
ITGA1	-0.674167	6.65117e-05	0.00159953	2.79601
TMEM26	-0.60766	6.64608e-05	0.0016006	2.79572
NOMO1	0.570866	6.71553e-05	0.00161269	2.79245
GCSAML	-0.660808	6.72603e-05	0.0016129	2.79239
WSB2	-0.507454	6.79676e-05	0.00162753	2.78847
RASGRP4	-0.550114	6.85003e-05	0.00163794	2.7857
IL18R1	-0.552997	6.86203e-05	0.00163847	2.78556
CRYBB1	-0.624864	6.90514e-05	0.00164641	2.78346
APOBEC3B	-0.689298	6.91943e-05	0.00164747	2.78318
FBLN2	0.597714	6.95672e-05	0.001654	2.78146
SPIB	-0.644214	6.98023e-05	0.00165723	2.78062
GOLGA8H	-0.65721	7.05244e-05	0.00166493	2.7786
SPI1	-0.598331	7.02705e-05	0.00166599	2.77833
LILRA6	-0.585209	7.0483e-05	0.00166631	2.77825
CEACAM6	-0.682438	7.04101e-05	0.00166694	2.77808
HIST1H2AE	-0.485739	7.14801e-05	0.00168512	2.77337
ST6GALNAC2	-0.600122	7.1796e-05	0.00169018	2.77207
CCDC40	-0.546068	7.1915e-05	0.00169061	2.77196
PCDHB9	0.543766	7.24123e-05	0.00169991	2.76957
CCPG1	0.560097	7.27382e-05	0.00170517	2.76823
PIGO	0.472615	7.28971e-05	0.00170651	2.76789
BLVRA	-0.716854	7.30429e-05	0.00170753	2.76763
OTUD7B	0.497948	7.33676e-05	0.00171034	2.76692
TTYH3	-0.595632	7.32932e-05	0.00171099	2.76675
LDLRAD3	-0.627476	7.35213e-05	0.00171154	2.76661
ARMH1	-0.639573	7.38702e-05	0.00171728	2.76516
SLC2A9	-0.620465	7.42133e-05	0.00172286	2.76375
GYPA	-0.493793	7.44213e-05	0.0017253	2.76314
WNT1	-0.646227	7.51155e-05	0.00173898	2.75971
SRPRB	0.543957	7.57146e-05	0.00175043	2.75686
SIGMAR1	0.595476	7.68601e-05	0.00177202	2.75153
RGS19	-0.707124	7.67898e-05	0.00177284	2.75133
HHAT	-0.648512	7.726e-05	0.00177879	2.74988
MATK	-0.594149	7.74814e-05	0.00178143	2.74923
C3	-0.609195	7.78939e-05	0.00178846	2.74752
SPACA3	0.619662	7.82863e-05	0.00179501	2.74593
GUCY2F	0.554542	7.86737e-05	0.00179896	2.74498
RAB27B	-0.503351	7.88151e-05	0.00179974	2.74479
ADAMTS10	-0.573658	7.86269e-05	0.00180035	2.74464
HLA-DMA	-0.577474	7.93842e-05	0.00180045	2.74462
HBD	-0.491752	7.9314e-05	0.0018013	2.74441
POLR2M	0.506138	7.92496e-05	0.00180228	2.74418
GCOM1	-0.591189	7.91158e-05	0.00180414	2.74373
NRXN2	-0.607003	7.92241e-05	0.00180415	2.74373
BMI1	0.662388	7.97129e-05	0.00180546	2.74341
XG	-0.712399	7.98482e-05	0.00180608	2.74326
DDX31	0.536332	8.086e-05	0.00182158	2.73955
SYK	-0.525754	8.0653e-05	0.00182182	2.73949
CD300LF	-0.555219	8.0847e-05	0.00182374	2.73904
XAGE1A	0.582962	8.10925e-05	0.00182436	2.73889
SELL	-0.555956	8.13903e-05	0.00182861	2.73788
IKBKE	-0.620268	8.18038e-05	0.00183297	2.73684
FAM110B	-0.573727	8.17844e-05	0.001835	2.73637
ELANE	-0.612558	8.22774e-05	0.00183866	2.7355
ZNF467	-0.549524	8.22128e-05	0.00183968	2.73526
ENC1	-0.528398	8.25852e-05	0.00184308	2.73446
EVPL	-0.664281	8.38399e-05	0.00186116	2.73022
PIM1	-0.571358	8.4063e-05	0.00186117	2.73021
MPO	-0.609868	8.39668e-05	0.0018615	2.73014
CEBPE	-0.632643	8.37613e-05	0.00186188	2.73005
HBA1	-0.487786	8.42096e-05	0.00186196	2.73003
KIF18B	-0.574641	8.36804e-05	0.00186256	2.72989
RASSF4	-0.600004	8.36407e-05	0.00186415	2.72952
DYSF	-0.62698	8.47144e-05	0.00187065	2.72801
PALM2-AKAP2	0.534185	8.66131e-05	0.00190503	2.7201
EBAG9	0.436287	8.642e-05	0.00190579	2.71992
SSX1	0.491709	8.65515e-05	0.00190618	2.71984
TARM1	-0.756115	8.75092e-05	0.00191718	2.71734
CLEC12B	-0.643432	8.75061e-05	0.00191963	2.71678
FCGR2A	-0.596765	8.75029e-05	0.00192208	2.71623
PXDC1	-0.504796	8.80064e-05	0.00192304	2.71601
DSP	-0.550832	8.7903e-05	0.00192329	2.71595
PRAM1	-0.622472	8.85466e-05	0.00192981	2.71449
EI24	0.390717	8.84344e-05	0.00192988	2.71447
DMWD	0.504924	8.93348e-05	0.00194445	2.7112
TRIM34	-0.512575	8.94779e-05	0.00194504	2.71107
ARX	-0.624999	8.97263e-05	0.00194539	2.71099
LIN7A	-0.592934	8.96654e-05	0.00194659	2.71073
HAVCR2	-0.517453	9.04639e-05	0.00195379	2.70912
PIAS1	0.475075	9.04452e-05	0.00195591	2.70865
MMP28	-0.723583	9.03408e-05	0.00195618	2.70859
HK1	-0.549933	9.1285e-05	0.00196644	2.70632
TESPA1	-0.568424	9.1169e-05	0.00196648	2.70631
GCA	-0.621676	9.22039e-05	0.0019786	2.70364
CDKN2D	-0.633268	9.21354e-05	0.00197967	2.70341
PFKP	-0.506076	9.2074e-05	0.00198089	2.70314
TMTC2	0.465796	9.2627e-05	0.00198513	2.70221
PADI2	-0.652878	9.32386e-05	0.0019906	2.70102
TACC3	-0.702868	9.34005e-05	0.00199151	2.70082
DLX5	-0.677201	9.31817e-05	0.00199192	2.70073
IGFBP2	-0.597957	9.30891e-05	0.00199249	2.7006
CA14	0.698724	9.4039e-05	0.00200258	2.69841
NCF4	-0.557329	9.43324e-05	0.00200627	2.69761
CRISP3	-0.636801	9.45819e-05	0.00200903	2.69701
MYO1E	-0.515944	9.47457e-05	0.00200995	2.69681
CALD1	-0.600586	9.55494e-05	0.00202444	2.6937
AFAP1	-0.633126	9.7218e-05	0.00205459	2.68727
SLC22A31	-0.563	9.7105e-05	0.0020548	2.68723
LBP	-0.677329	9.78054e-05	0.0020592	2.6863
TM9SF4	0.515351	9.76843e-05	0.00205924	2.68629
DQX1	-0.652121	9.75736e-05	0.0020595	2.68624
VCAN	-0.610572	9.80804e-05	0.0020624	2.68563
SDC2	-0.593181	9.86016e-05	0.00207076	2.68387
PRKAR2B	-0.616727	9.95334e-05	0.00208509	2.68087
JAKMIP2	-0.538745	9.95061e-05	0.00208713	2.68045
BAHCC1	-0.580878	0.000100027	0.00209021	2.67981
HRH2	-0.592274	9.99307e-05	0.0020908	2.67969
GPAA1	0.49784	0.000100238	0.00209199	2.67944
HIST2H3D	-0.502002	0.000100835	0.00210183	2.6774
CCDC80	-0.59247	0.000101309	0.00210647	2.67645
ACVRL1	-0.541266	0.000101184	0.00210649	2.67644
ACPP	-0.54917	0.00010144	0.00210657	2.67642
SLC24A4	-0.581315	0.000102491	0.00212577	2.67248
NLRP2	-0.601083	0.000102812	0.00212979	2.67166
STMN1	-0.538142	0.000104197	0.0021558	2.66639
KCNAB1	-0.565279	0.000104504	0.00215948	2.66565
ZNF77	-0.602426	0.000105097	0.00216907	2.66373
GALNT2	0.524375	0.000105909	0.00218045	2.66145
TNS1	-0.532556	0.000105809	0.00218107	2.66133
SLC4A7	-0.492382	0.000106373	0.00218463	2.66062
MMP17	-0.593081	0.000106246	0.0021847	2.66061
APOBR	-0.62933	0.000106699	0.00218595	2.66036
ITGAX	-0.631701	0.00010667	0.00218804	2.65995
SMARCA1	-0.577002	0.000107001	0.00218946	2.65966
CLEC4A	-0.563497	0.00010802	0.00219157	2.65924
TEDDM1	0.63895	0.000107931	0.00219241	2.65908
CTSE	-0.551185	0.000107829	0.00219301	2.65896
ADAMTS7	-0.636849	0.000108241	0.0021934	2.65888
TMEM71	-0.514943	0.000107804	0.00219516	2.65853
NRG3	0.433211	0.000107527	0.00219755	2.65806
MEGF9	-0.629724	0.000107793	0.00219761	2.65805
ERBB4	0.671016	0.000107773	0.00219988	2.6576
TNFSF13B	-0.515291	0.000108732	0.00220068	2.65744
ARRB2	-0.647006	0.000109439	0.00220963	2.65568
HIST3H2BB	-0.447139	0.000109415	0.00221181	2.65525
PGLYRP1	-0.633701	0.000111301	0.00223644	2.65044
LAMC1	0.543253	0.00011127	0.0022385	2.65004
GLIPR2	-0.68494	0.000111044	0.00223934	2.64988
PCDHB10	0.658848	0.000111253	0.00224085	2.64959
PCDHB7	0.64113	0.000112472	0.00225456	2.64694
C3AR1	-0.66713	0.000112414	0.00225611	2.64664
PDLIM2	-0.515398	0.000113939	0.00228123	2.64183
FAM43A	-0.512324	0.000114709	0.0022939	2.63943
LILRA1	-0.553226	0.000115713	0.00231122	2.63616
FHL2	-0.572456	0.000115985	0.00231389	2.63566
SCD	-0.572645	0.000116179	0.002315	2.63545
PHACTR2	-0.596781	0.000116525	0.00231913	2.63467
EBLN1	0.610402	0.0001178	0.00233895	2.63098
CXCL8	-0.593735	0.000117702	0.00233977	2.63083
HERC5	0.426146	0.000117983	0.0023398	2.63082
SRMS	-0.65439	0.000118551	0.0023483	2.62925
PCOLCE	-0.606288	0.000119189	0.00235536	2.62794
SEC16B	0.534444	0.000119057	0.00235553	2.62791
RASSF3	-0.54574	0.000119508	0.00235887	2.6273
PHF19	-0.484782	0.000119686	0.00235961	2.62716
LYST	-0.601753	0.000120004	0.00236309	2.62652
RBFOX2	0.741452	0.000120515	0.00237037	2.62518
NGFR	-0.65599	0.000121202	0.00238108	2.62323
NCKAP5	-0.506984	0.000121915	0.00238112	2.62322
CSF2RA	-0.547311	0.000121793	0.0023815	2.62315
CLDN23	-0.713594	0.000121368	0.00238155	2.62314
RAVER2	0.526864	0.000121512	0.00238157	2.62314
DNASE2B	-0.681797	0.000121682	0.00238212	2.62304
C7	-0.571522	0.000122245	0.00238478	2.62255
H2AFY2	-0.58048	0.000122935	0.00239545	2.62061
KDM1B	-0.601578	0.000123157	0.00239698	2.62034
GPR84	-0.658564	0.000123494	0.00240075	2.61965
DOCK1	-0.495725	0.000123876	0.00240538	2.61882
PALLD	-0.4467	0.000124035	0.00240567	2.61876
ASAP2	-0.53947	0.000124261	0.00240727	2.61847
CLPTM1L	0.580216	0.000125337	0.00242251	2.61573
CYBRD1	-0.502999	0.000125305	0.00242468	2.61535
TNNI2	-0.552523	0.000125813	0.0024261	2.61509
IARS	0.517707	0.000125808	0.0024288	2.61461
TREM1	-0.567585	0.00012692	0.00244464	2.61179
SLAMF8	-0.550539	0.000127359	0.00245028	2.61078
MPP6	0.59706	0.000128102	0.00246174	2.60876
CDKN1A	0.495451	0.000129228	0.00248053	2.60546
CXCL5	-0.630368	0.000129738	0.00248746	2.60424
LRRC18	-0.661359	0.000130612	0.00250135	2.60182
TPST2	-0.456655	0.000130871	0.00250346	2.60146
LRRC32	-0.594394	0.00013146	0.00251185	2.60001
LGALS9C	-0.631155	0.000131693	0.00251342	2.59973
BAIAP2	-0.486326	0.000132125	0.00251593	2.5993
STK4	-0.551701	0.000131978	0.002516	2.59929
DCAF12L2	0.54492	0.000134903	0.00254566	2.5942
SPINK5	0.630816	0.000133992	0.0025457	2.59419
MID2	0.529739	0.000134794	0.00254648	2.59406
TF	-0.540525	0.000135131	0.0025471	2.59395
ARHGEF10L	-0.589851	0.000134546	0.00254754	2.59388
MROH2A	0.526987	0.000134424	0.00254813	2.59378
MSRB1	-0.587605	0.000133983	0.00254842	2.59373
RIMKLB	-0.558382	0.000135677	0.00254877	2.59367
VAT1L	-0.678524	0.000134769	0.00254888	2.59365
ARPC5L	0.649389	0.000134315	0.00254894	2.59364
WNT10B	-0.577834	0.000135663	0.00255139	2.59322
CTSB	-0.542947	0.00013553	0.00255175	2.59316
CD177	-0.574427	0.000136629	0.00256379	2.59112
THBS1	-0.599616	0.000137477	0.00257392	2.58941
F5	-0.556121	0.000137645	0.0025742	2.58936
LRRN1	0.468802	0.000137412	0.00257559	2.58912
RPRD1A	0.399258	0.000139514	0.00259754	2.58544
TMED3	0.46878	0.000139209	0.00259763	2.58542
SLC27A4	0.486175	0.000139134	0.00259914	2.58517
CTSG	-0.588313	0.000139514	0.00260043	2.58496
HEMGN	-0.5245	0.00014017	0.00260685	2.58388
NECTIN2	-0.566719	0.000141023	0.0026198	2.58173
DEFA3	-0.514945	0.000143071	0.00265196	2.57643
CD101	-0.638553	0.000142968	0.00265299	2.57626
BUD23	0.567813	0.000143783	0.00266221	2.57476
HS3ST2	-0.589088	0.000144463	0.00267185	2.57319
H1F0	-0.490179	0.000144795	0.00267503	2.57267
POGLUT2	-0.620092	0.000145586	0.00268667	2.57078
PLXDC2	-0.605312	0.000146149	0.00269114	2.57006
EFNB1	-0.636527	0.000146348	0.00269184	2.56995
NOMO2	0.557055	0.000146078	0.00269279	2.5698
ARPC5	-0.53541	0.000146788	0.00269401	2.5696
UBA5	0.592503	0.00014667	0.00269479	2.56947
RHOG	-0.50561	0.000147524	0.00270455	2.5679
RAI14	-0.57305	0.000150107	0.00274588	2.56132
AGTRAP	-0.717283	0.000150033	0.00274753	2.56106
GRB10	-0.587168	0.000150606	0.002749	2.56082
ITGAD	-0.551851	0.000150605	0.002752	2.56035
SERPINF2	-0.539101	0.000151264	0.00275802	2.5594
CA4	-0.583139	0.00015165	0.00275903	2.55924
FAM20C	-0.61261	0.000151498	0.00275927	2.55921
CHST13	-0.686075	0.000152996	0.0027805	2.55588
RGL4	-0.610355	0.000153357	0.00278405	2.55532
C1orf54	-0.542511	0.00015482	0.00280755	2.55167
IL1R1	-0.506428	0.000155526	0.00281123	2.5511
CFP	-0.579688	0.000155261	0.0028125	2.55091
SLC7A10	-0.695366	0.000155962	0.00281303	2.55083
NREP	-0.608994	0.000155502	0.00281382	2.5507
ADAMTS19	0.549034	0.000155876	0.00281452	2.5506
ULK2	-0.505241	0.000157208	0.00282637	2.54877
HIST2H3A	-0.644407	0.000157158	0.00282851	2.54844
BCAS4	-0.629242	0.00015713	0.00283104	2.54805
ZYX	-0.582275	0.000158185	0.00283784	2.54701
SYT17	-0.619856	0.000158453	0.00283961	2.54674
CHST10	-0.589588	0.000158183	0.00284084	2.54655
LONRF3	-0.575489	0.000159213	0.00284105	2.54652
CCDC141	-0.619756	0.000158754	0.00284195	2.54638
PITPNM2	-0.564143	0.00015911	0.00284224	2.54634
MBOAT2	-0.467435	0.000159081	0.00284476	2.54595
PF4	-0.522521	0.000159697	0.00284666	2.54567
VIL1	-0.622907	0.000161358	0.00287319	2.54163
MBTPS2	0.476934	0.000161732	0.00287375	2.54155
SIGLEC5	-0.643611	0.000161705	0.00287632	2.54116
GALE	-0.495222	0.00016277	0.00288913	2.53923
DZIP1L	-0.553934	0.000163834	0.00290186	2.53732
DPPA4	-0.626099	0.000163707	0.00290268	2.5372
NRIP1	-0.509405	0.000164315	0.00290729	2.53651
NQO1	-0.617849	0.000165126	0.00291549	2.53529
TLE2	-0.571524	0.000165102	0.00291814	2.53489
NRGN	-0.587196	0.000165453	0.00291818	2.53489
ADGRL3	0.535958	0.000167715	0.00294257	2.53127
R3HDM1	0.460583	0.000167026	0.00294281	2.53124
FAM174A	0.465082	0.000167378	0.00294283	2.53124
GGT5	-0.567342	0.000167215	0.00294305	2.5312
IER3	-0.490132	0.000167583	0.00294334	2.53116
ATP8B4	-0.633971	0.000167967	0.00294391	2.53108
DTX1	-0.561172	0.000168304	0.00294673	2.53066
SDCBP	-0.572192	0.00017008	0.0029685	2.52746
PLB1	-0.62671	0.000169795	0.00296973	2.52728
TREML1	-0.559735	0.00017003	0.00297073	2.52714
PIK3CD	-0.623107	0.000171195	0.00298175	2.52553
IL1R2	-0.552437	0.00017116	0.00298424	2.52517
GFM1	0.413756	0.00017188	0.00298747	2.5247
DENND5A	-0.566117	0.000171715	0.00298771	2.52466
SERPINB8	-0.567391	0.000172772	0.00299984	2.5229
TARSL2	0.494655	0.000173623	0.00300839	2.52167
CD5L	-0.615198	0.000173992	0.00300855	2.52164
JAKMIP1	-0.578333	0.000173528	0.00300985	2.52145
NPDC1	-0.614128	0.000173977	0.0030114	2.52123
GNB4	-0.452549	0.000176719	0.00304313	2.51668
HRH1	-0.623628	0.000176206	0.00304369	2.5166
PAX6	0.662291	0.000176575	0.00304377	2.51659
TMEM176B	-0.520082	0.000176543	0.00304636	2.51622
APOL3	-0.477027	0.000177938	0.00306097	2.51414
LGALS12	-0.54024	0.000179602	0.0030801	2.51144
HK3	-0.623166	0.000179552	0.0030824	2.51111
MTREX	0.410282	0.000179409	0.00308311	2.51101
SGPP1	-0.549499	0.000180408	0.00308444	2.51082
PDGFRB	-0.651909	0.000180375	0.00308703	2.51046
CFAP47	0.55252	0.000180195	0.0030871	2.51045
SELENOP	-0.50713	0.00018208	0.00310036	2.50859
TMEM204	-0.660109	0.000182048	0.00310298	2.50822
PHLDB1	-0.570532	0.000181689	0.00310318	2.50819
C5AR2	-0.516596	0.00018201	0.00310548	2.50787
MLC1	-0.517017	0.000183894	0.00312806	2.50472
LRRN2	0.59768	0.000185624	0.00315429	2.5011
LYL1	-0.611017	0.000186334	0.00316314	2.49988
SLCO5A1	0.463084	0.000186865	0.00316893	2.49909
TMC8	-0.536599	0.000188888	0.0032	2.49485
ATOH8	-0.680555	0.000190138	0.00321468	2.49286
NEURL1B	-0.648754	0.000190077	0.00321689	2.49256
ABO	-0.627289	0.000191013	0.00322296	2.49175
GPR55	-0.56971	0.000190892	0.00322417	2.49158
ZNF185	-0.498857	0.000194445	0.00326768	2.48576
CD33	-0.532859	0.000193865	0.00326779	2.48575
MRO	-0.540507	0.000194994	0.00327035	2.48541
INF2	-0.671087	0.000194432	0.00327076	2.48535
LPGAT1	-0.510927	0.000194247	0.00327092	2.48533
AC098850.3	0.600771	0.000194962	0.00327309	2.48504
CALCA	0.649584	0.000195438	0.00327452	2.48485
HIST1H2BI	-0.444041	0.000197167	0.00330018	2.48146
C21orf58	-0.669544	0.000197655	0.00330505	2.48082
C1QTNF5	-0.638697	0.000198463	0.00330865	2.48035
TAL1	-0.501629	0.000198306	0.00330932	2.48026
FGL2	-0.56198	0.000198138	0.00330981	2.4802
ARHGEF6	-0.466646	0.000199063	0.00331533	2.47947
GSDMA	-0.664763	0.000200444	0.00332511	2.47819
SULT1B1	-0.62762	0.000200366	0.00332712	2.47793
RASSF8	0.424606	0.000200247	0.00332843	2.47776
CUEDC1	-0.557131	0.000200204	0.00333103	2.47742
ZFHX3	-0.59501	0.000201256	0.00333527	2.47687
FBLN1	-0.590319	0.000201953	0.0033402	2.47623
HIF1A	-0.499829	0.000201938	0.00334326	2.47583
BEX1	-0.543123	0.000203748	0.00336325	2.47324
PLOD3	0.537478	0.000203643	0.00336484	2.47304
RBP4	-0.639481	0.000204285	0.00336547	2.47295
CHRFAM7A	-0.653407	0.000204127	0.00336619	2.47286
SIGLEC14	-0.545693	0.000204556	0.00336662	2.47281
RGS18	-0.546944	0.000205425	0.0033743	2.47182
AATK	-0.642633	0.000205344	0.00337628	2.47156
RFX2	-0.657147	0.000206179	0.00337673	2.4715
KLK1	-0.625105	0.000205848	0.00337793	2.47135
CLEC12A	-0.500318	0.000206056	0.00337802	2.47134
HIPK2	0.509197	0.000206485	0.00337844	2.47128
KCNS3	0.653242	0.000206837	0.00338089	2.47097
FAM174C	0.523662	0.000207583	0.00338978	2.46983
DNAJC10	0.46501	0.000208965	0.00340902	2.46737
BBX	0.510227	0.000209297	0.00341111	2.4671
FHL3	-0.518929	0.000210686	0.00342708	2.46508
DDO	-0.603251	0.00021054	0.00342803	2.46496
TTC7B	-0.527486	0.000211261	0.0034331	2.46431
CYP27A1	-0.587979	0.000212491	0.0034364	2.4639
SOWAHD	-0.656686	0.000212387	0.00343805	2.46369
TSHZ3	-0.565241	0.000211776	0.00343812	2.46368
CYYR1	-0.66826	0.000212005	0.00343851	2.46363
SASH1	-0.533443	0.000212293	0.00343985	2.46346
SAMD12	0.64979	0.000213656	0.0034519	2.46194
ATP1B2	-0.509703	0.000214086	0.00345219	2.46191
HAAO	-0.474309	0.000213969	0.00345363	2.46172
ACRBP	-0.558123	0.000214594	0.00345705	2.46129
SCN2A	0.541203	0.000215877	0.00346107	2.46079
DEFA1	-0.670637	0.000216104	0.00346139	2.46075
NEXN	-0.727112	0.000215864	0.00346417	2.4604
DGKG	-0.588338	0.000215864	0.00346749	2.45998
C2orf69	0.488102	0.0002157	0.0034682	2.4599
CHD3	-0.595924	0.000216806	0.0034693	2.45976
EXOC3L2	-0.649706	0.000215642	0.0034706	2.4596
CES1	-0.545708	0.00021818	0.00348464	2.45784
GPR27	-0.628327	0.000217988	0.0034849	2.45781
AEBP1	-0.541311	0.000218406	0.00348492	2.45781
PIK3AP1	-0.53039	0.000218719	0.00348658	2.4576
AKNA	-0.638954	0.000218988	0.00348756	2.45748
HLA-DOA	-0.611294	0.00022043	0.00350718	2.45504
TFF3	-0.669356	0.000221884	0.00352696	2.4526
BMP3	-0.710997	0.000222464	0.00353282	2.45188
ECPAS	0.510373	0.000222759	0.00353416	2.45171
CXCL2	-0.509611	0.000223526	0.00354298	2.45063
HACD3	0.455659	0.000224755	0.00355908	2.44866
PLIN2	-0.422963	0.000225392	0.0035658	2.44784
ITGA2B	-0.579726	0.000226945	0.00358359	2.44568
STXBP6	0.65783	0.000226825	0.00358508	2.4455
FKBP1A	-0.546284	0.000228648	0.0036003	2.44366
GRAMD1B	-0.657962	0.000228235	0.00360056	2.44363
TNFRSF1B	-0.561947	0.000228476	0.00360097	2.44358
ZNF738	-0.577257	0.000229604	0.00361195	2.44226
MEF2C	0.471796	0.000230372	0.00362062	2.44122
TMEM132C	-0.637251	0.00023299	0.00364806	2.43794
ZWINT	-0.515329	0.000232781	0.00364821	2.43792
MYBPH	-0.647795	0.000233273	0.00364909	2.43782
SLC44A2	-0.589849	0.000232745	0.00365107	2.43758
ABCE1	0.500228	0.000232631	0.0036527	2.43739
RUVBL1	0.436116	0.000235312	0.00367411	2.43485
TRPS1	-0.596815	0.00023522	0.0036761	2.43461
KCNA6	-0.665934	0.000235667	0.00367622	2.4346
TBXA2R	-0.535723	0.000236308	0.0036828	2.43382
SLC38A1	0.411826	0.000237301	0.00369483	2.43241
ILK	-0.5622	0.000238117	0.0037041	2.43132
CDCA2	-0.509991	0.000238594	0.00370806	2.43085
EID1	0.567721	0.000240178	0.00372922	2.42838
APOBEC3A	-0.621856	0.000241642	0.00374848	2.42614
MCAM	-0.565356	0.000243018	0.00376284	2.42448
DCAF8L1	0.393326	0.000242962	0.00376546	2.42418
CPAMD8	-0.523417	0.000243514	0.00376704	2.424
TWSG1	0.353383	0.000243835	0.00376853	2.42383
LRRC6	-0.533283	0.000244467	0.00377133	2.42351
CAMK4	-0.634636	0.000244388	0.00377359	2.42325
CFH	-0.591382	0.000245768	0.0037879	2.4216
RNF43	-0.589031	0.000248452	0.00382576	2.41728
LILRA4	-0.607861	0.00024942	0.00383361	2.41639
MAML3	-0.535238	0.000249302	0.00383532	2.4162
MMP25	-0.644331	0.000251415	0.00384661	2.41492
PCYT1B	-0.60512	0.000250989	0.00384711	2.41486
S100P	-0.544809	0.000250563	0.00384763	2.41481
SPTB	-0.51962	0.000251294	0.00384827	2.41473
AC019117.3	-0.537203	0.000250884	0.00384903	2.41465
OPHN1	-0.578687	0.000253243	0.00384994	2.41455
BCL7A	-0.48967	0.000253965	0.00385042	2.41449
AOAH	-0.545626	0.000253077	0.00385091	2.41444
CSF3R	-0.579244	0.00025244	0.00385173	2.41434
RHOBTB1	-0.462236	0.000252907	0.00385183	2.41433
RANBP6	0.498093	0.000253902	0.00385296	2.41421
RASA2	0.510501	0.00025282	0.00385401	2.41409
SLC41A3	0.41684	0.000252395	0.00385454	2.41403
CYP2S1	-0.551451	0.000253797	0.00385486	2.41399
GUCA1C	0.458883	0.000252198	0.00385506	2.41397
SEC61A1	0.600549	0.000255332	0.00386765	2.41255
G0S2	-0.538067	0.000256892	0.00388775	2.4103
COL5A1	-0.529472	0.00025746	0.00389283	2.40973
ELK3	0.475405	0.000258076	0.00389862	2.40909
LARP1	0.528947	0.000258686	0.00390431	2.40846
GIMAP8	-0.530223	0.000259046	0.00390623	2.40824
SPEG	-0.586593	0.000259879	0.00391526	2.40724
CD69	-0.533803	0.000261063	0.00392956	2.40566
TNFRSF25	-0.554819	0.000262459	0.00394703	2.40373
ABL2	0.522675	0.000263427	0.00395803	2.40252
G6PD	-0.582729	0.000264715	0.00397381	2.40079
PTGIR	-0.592618	0.000265607	0.00398363	2.39972
LGI2	-0.60941	0.00026702	0.00399409	2.39858
C11orf21	-0.550114	0.000266793	0.00399427	2.39856
OSMR	-0.714612	0.000266569	0.00399447	2.39854
TUBB4A	-0.558523	0.000268993	0.00401283	2.39655
PSAT1	0.478936	0.000268828	0.00401396	2.39643
SELP	-0.549098	0.000269375	0.00401496	2.39632
PLEK	-0.524279	0.000268757	0.00401648	2.39615
IDO1	-0.632473	0.000271314	0.00404026	2.39359
PPP1R3C	-0.622491	0.000272127	0.00404876	2.39268
IFITM3	-0.523055	0.000274163	0.00405026	2.39252
PTPRG	0.521453	0.00027448	0.00405137	2.3924
BCL2A1	-0.501388	0.000274012	0.0040516	2.39237
DCLK2	-0.617674	0.000273672	0.00405374	2.39214
HPSE	-0.592097	0.000273957	0.00405437	2.39208
BMP4	0.624408	0.000273647	0.00405696	2.3918
CPVL	-0.510391	0.000273375	0.00406012	2.39146
CORO1A	-0.580495	0.000273618	0.00406013	2.39146
SLPI	-0.610459	0.000273287	0.00406242	2.39122
GP6	-0.542544	0.00027582	0.00406755	2.39067
SLC39A14	0.453306	0.00027754	0.00408931	2.38835
RTN1	-0.541374	0.000277802	0.00408957	2.38832
GIMAP7	-0.480395	0.000278583	0.00409387	2.38787
CASS4	-0.541762	0.000278845	0.00409413	2.38784
CEACAM8	-0.579354	0.000278414	0.00409499	2.38775
OSCAR	-0.536447	0.000280391	0.00411322	2.38582
MLLT3	0.576209	0.000283923	0.00416138	2.38076
LMCD1	-0.621089	0.000285781	0.00417765	2.37907
PCDHB8	0.583085	0.000285608	0.00417876	2.37895
ACKR1	-0.608318	0.000285543	0.00418147	2.37867
RAG1	-0.60296	0.000287224	0.00419508	2.37726
CLEC11A	-0.574005	0.000287922	0.0042016	2.37659
CAMP	-0.511064	0.000288767	0.00420659	2.37607
NOL4L	-0.602718	0.000289041	0.00420693	2.37603
EPB42	-0.469765	0.00028948	0.00420965	2.37575
NECTIN1	-0.489539	0.000288727	0.00420968	2.37575
SIRPD	-0.557221	0.000291828	0.00424013	2.37262
HLA-DPB1	-0.57271	0.00029313	0.00425534	2.37107
SMS	-0.442497	0.00029377	0.00426093	2.3705
DCN	-0.530665	0.000295858	0.00428751	2.36779
ADAM10	0.516815	0.000298929	0.00432452	2.36406
DEFA4	-0.616744	0.000298805	0.00432647	2.36387
DLL1	-0.571354	0.000299711	0.00433209	2.3633
LIMD2	-0.502093	0.000300513	0.00433993	2.36252
PDE12	0.421723	0.000300844	0.00434096	2.36241
CLEC10A	-0.618623	0.000302234	0.00435727	2.36079
ADAMTS9	-0.545221	0.000303643	0.0043663	2.35989
E2F8	-0.579387	0.000303126	0.00436636	2.35988
C6orf52	0.630313	0.000303556	0.0043688	2.35964
ANK1	-0.47681	0.000305449	0.00437723	2.3588
MTUS1	0.463683	0.000305731	0.00437752	2.35877
SLC19A2	0.402991	0.00030469	0.0043776	2.35876
C20orf27	-0.471669	0.000305088	0.00437956	2.35857
CNRIP1	-0.530727	0.000305372	0.00437988	2.35854
COMMD3	0.635858	0.000306509	0.00438491	2.35804
SIRPB1	-0.582733	0.000308829	0.00441434	2.35513
LPCAT4	0.585437	0.000310089	0.00442102	2.35448
ZNF492	-0.584419	0.000309908	0.0044222	2.35436
HBE1	0.50218	0.000309745	0.00442364	2.35422
LOXHD1	-0.616078	0.00031092	0.0044291	2.35368
PLD1	-0.519831	0.000313015	0.00445136	2.35151
SLAMF7	0.53975	0.000312789	0.00445193	2.35145
ZHX2	0.533289	0.000314404	0.00446731	2.34995
OR1L8	0.613869	0.000315317	0.00447648	2.34906
PLXDC1	-0.600703	0.000317254	0.00450017	2.34677
PCSK2	-0.556269	0.000317567	0.00450079	2.34671
PPP1R9A	-0.489727	0.000317841	0.00450086	2.3467
ESAM	-0.529137	0.000318737	0.00450974	2.34585
IGFBP7	-0.579405	0.000321778	0.00454893	2.34209
LIPA	-0.479965	0.000323694	0.0045606	2.34098
RAP1A	-0.471375	0.000322914	0.00456113	2.34093
FREM3	0.614403	0.000323219	0.00456158	2.34088
MYL4	-0.441542	0.000323583	0.00456287	2.34076
GPAT3	-0.487209	0.000324333	0.00456576	2.34049
SLC11A1	-0.627215	0.000325804	0.00458261	2.33889
MACO1	0.513251	0.000327336	0.0046003	2.33721
MTRR	0.463227	0.00033027	0.00460672	2.33661
JAM3	-0.567915	0.000330011	0.00460694	2.33659
UFL1	0.406202	0.000328654	0.00460721	2.33656
TMEM176A	-0.453771	0.000328577	0.00461	2.3363
CPA3	-0.629122	0.000328304	0.00461003	2.3363
OBSL1	-0.491657	0.000330004	0.00461069	2.33623
RALYL	0.527718	0.000329544	0.00461196	2.33611
SCYL2	0.611737	0.00033	0.00461449	2.33588
ASB2	-0.48138	0.00032952	0.00461549	2.33578
CNR2	-0.660372	0.000331179	0.00461556	2.33578
TATDN1	0.361183	0.000332295	0.00462725	2.33468
SPARC	-0.517526	0.000333666	0.00463094	2.33433
ANKFN1	0.568627	0.000333618	0.0046341	2.33403
ADGRF5	-0.561477	0.000333394	0.00463485	2.33396
SLC1A4	0.572409	0.000333376	0.00463844	2.33363
CP	-0.626136	0.000334782	0.00464257	2.33324
EPB41L2	-0.569929	0.000337214	0.00467242	2.33046
MMP8	-0.555155	0.000338091	0.00467683	2.33005
VNN2	-0.464992	0.00033784	0.00467723	2.33001
IMP4	0.43875	0.00033875	0.00468207	2.32956
AC020909.1	-0.646782	0.000340256	0.00469128	2.32871
PDE3B	-0.549942	0.000339833	0.00469317	2.32853
MAN2A1	0.579692	0.000340682	0.00469327	2.32852
LRIG1	-0.445008	0.000340204	0.00469442	2.32842
CCNF	-0.533448	0.00034294	0.0047205	2.32601
MEGF6	-0.532209	0.000343694	0.004727	2.32541
PAX5	-0.42192	0.000344123	0.00472901	2.32523
PCDHB11	0.630793	0.000345913	0.00474192	2.32405
RNF217	-0.462591	0.000345728	0.00474328	2.32392
FBN1	-0.549558	0.000345691	0.00474665	2.32361
TNFAIP2	-0.530065	0.00034679	0.00475005	2.3233
RCN3	-0.470062	0.000347553	0.00475662	2.3227
TMEM68	0.331853	0.000348082	0.00475997	2.3224
MYEOV	0.54925	0.000348983	0.00476838	2.32163
SDC4	-0.543283	0.000350753	0.00478087	2.32049
ZNF93	-0.511064	0.000350212	0.00478129	2.32046
CXCL16	-0.453528	0.000350499	0.00478129	2.32045
FARP1	-0.494455	0.000352526	0.00479721	2.31901
PDGFRA	-0.604453	0.000352326	0.0047984	2.3189
PNKD	-0.482769	0.000353464	0.00480607	2.31821
TCF7L2	-0.570581	0.000354562	0.00481709	2.31722
OSM	-0.614486	0.000357907	0.0048586	2.31349
STAB1	-0.552215	0.000361885	0.00490861	2.30904
MMD	-0.448224	0.000362466	0.00491251	2.3087
CRISP2	-0.604993	0.000363481	0.00492229	2.30783
NR2C2AP	0.354348	0.00036434	0.00492993	2.30716
RASGRF1	-0.572418	0.000365517	0.00494187	2.30611
SLC4A3	-0.62662	0.000366678	0.00495355	2.30508
TMEM40	-0.526634	0.000367511	0.0049608	2.30445
OR1J4	0.552965	0.00036853	0.00496655	2.30395
CEACAM3	-0.594307	0.000368299	0.00496744	2.30387
CPPED1	-0.497192	0.000369584	0.00497275	2.3034
ZNF275	0.42203	0.000369461	0.0049751	2.3032
CHI3L2	-0.625135	0.000370628	0.00498279	2.30253
ERBIN	0.452806	0.000373336	0.00501114	2.30006
SKAP2	-0.397175	0.000373172	0.00501297	2.29991
NOTCH3	-0.453132	0.000374975	0.00502911	2.29851
C4orf47	0.581178	0.000377509	0.005055	2.29628
TMEM179B	0.5489	0.000377254	0.00505562	2.29623
IRS2	-0.580792	0.000378854	0.00506895	2.29508
SEL1L	0.470769	0.000379991	0.0050801	2.29413
GASK1B	-0.559735	0.000380566	0.00508373	2.29382
ELF4	-0.566194	0.000381589	0.00508927	2.29334
MRC2	-0.539356	0.000381389	0.00509066	2.29323
SHC2	-0.602623	0.00038318	0.00510643	2.29188
HTR2A	-0.668651	0.000383891	0.00511182	2.29142
OTOA	-0.563789	0.000385111	0.00511993	2.29074
SERPING1	-0.498644	0.00038502	0.00512278	2.29049
PFN2	0.560315	0.000386411	0.00512907	2.28996
DOCK5	-0.578014	0.000386291	0.00513154	2.28975
RHBDL1	-0.506551	0.000387363	0.00513762	2.28924
MRRF	0.373979	0.000388398	0.00514727	2.28842
SH2B3	-0.562514	0.000389527	0.00515407	2.28785
NRP2	-0.468509	0.000389347	0.00515576	2.28771
GPR183	-0.503966	0.000390266	0.00515977	2.28737
NEB	0.571023	0.00039147	0.00517161	2.28637
ZBED1	-0.607133	0.000392851	0.0051776	2.28587
ABR	-0.532499	0.000392274	0.00517814	2.28583
SLC7A3	-0.622171	0.000392622	0.00517865	2.28578
GATA1	-0.442352	0.000394686	0.0051936	2.28453
RPL4	0.539929	0.00039442	0.00519418	2.28448
ZSCAN9	0.381803	0.000395411	0.00519904	2.28408
RAD23A	0.421296	0.000396319	0.0052069	2.28342
IMPA2	-0.447422	0.000397484	0.00520993	2.28317
SERP1	0.523412	0.000397247	0.0052109	2.28309
VAV2	-0.568349	0.00039712	0.00521333	2.28289
RHBDF1	-0.537312	0.000399846	0.00523679	2.28094
FCN2	-0.649175	0.000401048	0.00524023	2.28065
NF1	0.543365	0.000400519	0.00524151	2.28054
ATP6V0E2	-0.563608	0.000400908	0.00524249	2.28046
MYB	-0.563247	0.000404007	0.00526657	2.27847
VASP	-0.637431	0.000403387	0.00526669	2.27846
COL1A2	-0.455782	0.00040381	0.0052681	2.27835
PTPRE	-0.607704	0.00040481	0.00527292	2.27795
KALRN	-0.58159	0.000405539	0.00527831	2.2775
RIN2	-0.488835	0.000406303	0.00528415	2.27703
TC2N	-0.472705	0.000406834	0.00528695	2.27679
ARSD	-0.511846	0.000408224	0.0053009	2.27565
TPM2	-0.57048	0.000409316	0.00531095	2.27483
GP1BB	-0.519379	0.000409771	0.00531274	2.27468
CHID1	0.585268	0.000413509	0.00535291	2.27141
ZNF578	-0.584826	0.000413846	0.00535314	2.27139
EGF	-0.550239	0.000413262	0.00535385	2.27133
RILPL2	-0.597497	0.0004155	0.00536623	2.27033
BASP1	-0.584849	0.000415273	0.00536744	2.27023
HIST1H2BF	-0.412979	0.000416166	0.00537069	2.26997
CDH12	0.466189	0.000416848	0.00537121	2.26993
LTBP2	-0.59548	0.000416662	0.00537295	2.26979
ARMCX1	-0.487523	0.000418717	0.00539114	2.26832
CXXC5	0.404393	0.000419581	0.00539811	2.26776
HACD1	-0.579178	0.000420019	0.00539959	2.26764
STMN3	-0.578779	0.00042462	0.00543787	2.26457
SPA17	-0.559091	0.000424298	0.0054379	2.26457
LCN10	-0.687554	0.000423686	0.00543839	2.26453
COL9A3	-0.448741	0.000423373	0.00543855	2.26452
LAMP3	0.531945	0.000424103	0.00543957	2.26444
SMOC1	0.430907	0.00042557	0.00544587	2.26393
GABRA3	0.370327	0.000426971	0.00545962	2.26284
CLEC1B	-0.488505	0.000428641	0.00546427	2.26247
MYH9	-0.662939	0.000429562	0.00546769	2.2622
VDR	0.556776	0.000428622	0.0054682	2.26216
CLN6	0.500011	0.000429287	0.00546834	2.26214
C1QTNF1	-0.632602	0.000428617	0.00547231	2.26183
GPR37	0.580244	0.000428377	0.00547342	2.26174
GNAQ	-0.515055	0.000430583	0.00547652	2.2615
SNX20	-0.472787	0.000431465	0.00547942	2.26127
CRYL1	-0.337453	0.000431337	0.00548194	2.26107
PRUNE2	-0.466361	0.000432356	0.00548656	2.2607
CARD9	-0.590561	0.000433075	0.00549153	2.26031
CCNT2	0.442116	0.000433747	0.00549172	2.26029
TUBB1	-0.554105	0.000433448	0.00549209	2.26026
PMEPA1	0.503493	0.000434406	0.00549591	2.25996
ANKLE1	-0.605219	0.000436392	0.00551687	2.25831
SERPINB2	-0.599377	0.000440474	0.00556007	2.25492
CRYBA4	-0.621085	0.00044019	0.00556068	2.25487
MICAL2	-0.535441	0.000441471	0.00556846	2.25427
WDR3	0.371551	0.000441841	0.00556893	2.25423
CARD10	-0.601781	0.00044224	0.00556976	2.25416
COL17A1	-0.681809	0.000444481	0.00558538	2.25295
NCKAP5L	-0.451708	0.000443912	0.00558662	2.25285
TYRP1	0.596172	0.00044425	0.00558667	2.25285
AC068234.1	-0.546471	0.000445305	0.00559153	2.25247
COMMD3-BMI1	0.367638	0.000446534	0.00559856	2.25192
SREBF2	0.527998	0.000446409	0.00560119	2.25172
RAB31	-0.475055	0.000448376	0.00561326	2.25079
DIAPH3	-0.556833	0.000448129	0.00561436	2.2507
CDCA3	-0.497455	0.00045007	0.00563025	2.24947
TRIM10	-0.467288	0.000451284	0.0056328	2.24928
RNASE6	-0.550221	0.00045062	0.00563292	2.24927
CNKSR3	-0.626311	0.00045114	0.0056352	2.24909
FGFR1	-0.473859	0.000452583	0.00564481	2.24835
DAP3	0.432121	0.000453448	0.00565139	2.24785
PXDN	-0.38218	0.000455564	0.00566932	2.24647
HTRA3	-0.617051	0.000455484	0.00567254	2.24622
SLC39A7	0.489393	0.000457309	0.0056868	2.24513
FAM214A	0.536583	0.000458585	0.00569843	2.24424
COL4A6	0.532222	0.000460602	0.00571926	2.24266
2023-03-03	-0.52882	0.000461615	0.00572758	2.24203
PON2	0.501185	0.000462184	0.0057304	2.24182
PROS1	-0.535586	0.000462607	0.00573139	2.24174
EIF5A2	-0.550402	0.000463827	0.00574226	2.24092
RANBP3L	0.587682	0.000465058	0.00575325	2.24009
ALAS2	-0.439178	0.000467212	0.00577562	2.2384
SHANK1	-0.635455	0.000468036	0.00578153	2.23796
IL6ST	0.59783	0.000468439	0.00578225	2.2379
CLINT1	0.446077	0.000469012	0.00578506	2.23769
SMIM5	-0.605357	0.00047025	0.00579179	2.23719
RGS6	-0.574583	0.000470217	0.00579564	2.2369
SPECC1	-0.502605	0.000471843	0.00580714	2.23604
SNAP47	0.405588	0.000475503	0.00583502	2.23396
CYP7B1	-0.597075	0.000474919	0.00583642	2.23385
ACAP1	-0.624422	0.000474603	0.00583681	2.23382
P4HB	0.454442	0.00047536	0.00583754	2.23377
TRPT1	0.388963	0.000477676	0.0058574	2.2323
COL3A1	-0.480975	0.000479976	0.00588129	2.23053
NXF3	-0.56419	0.000482387	0.00590651	2.22867
CAPG	-0.474349	0.000482795	0.00590718	2.22862
ST8SIA6	-0.609055	0.000483563	0.00591226	2.22825
TSPAN9	-0.528098	0.000485491	0.00593149	2.22684
RBMS3	-0.499996	0.000486714	0.0059421	2.22606
ERGIC3	0.513313	0.000490752	0.00598267	2.2231
C9	0.471683	0.000490429	0.00598309	2.22307
CD52	-0.613941	0.000491322	0.00598526	2.22292
SORBS3	-0.47151	0.000492092	0.00599029	2.22255
HIST1H3A	-0.307666	0.000494036	0.00600957	2.22116
PBX4	-0.541629	0.000495115	0.00601396	2.22084
ZNF592	0.471595	0.000495763	0.00601746	2.22059
ITGA2	-0.543769	0.000495114	0.00601832	2.22052
L1TD1	-0.638217	0.000498437	0.00604553	2.21857
ATRN	0.506249	0.00049978	0.00605305	2.21803
SEMA6D	-0.544177	0.000499572	0.00605491	2.21789
CCIN	-0.593414	0.000504566	0.00610218	2.21451
SLC44A1	0.464956	0.000504505	0.00610586	2.21425
MCM10	-0.481426	0.000507022	0.00612747	2.21272
FAM171A1	-0.474089	0.000508358	0.00613917	2.21189
HYDIN	0.506431	0.000510141	0.00615627	2.21068
SLC12A2	0.485503	0.000511558	0.00616448	2.2101
PPBP	-0.532858	0.000511436	0.00616745	2.20989
MAGEA6	0.432312	0.000514222	0.00619212	2.20816
RPN2	0.514757	0.000516634	0.00620777	2.20706
LRRTM3	0.494805	0.000516292	0.00620811	2.20704
IDH3A	0.436009	0.00051595	0.00620846	2.20702
PCDHB14	0.520172	0.000517623	0.00621518	2.20655
USO1	0.509633	0.00052111	0.00625258	2.20394
KIFC3	-0.492399	0.000521892	0.00625747	2.2036
NEIL3	-0.503349	0.000526019	0.00630243	2.20049
BRI3	-0.410846	0.000526411	0.00630263	2.20048
HFE	-0.433345	0.00052775	0.00630963	2.2
SEC63	0.507671	0.000528161	0.00631003	2.19997
PIWIL4	-0.478028	0.000527648	0.00631291	2.19977
EEPD1	-0.579574	0.000529588	0.00632257	2.19911
ZNF730	-0.571721	0.000530277	0.00632629	2.19885
CEACAM16	0.395945	0.000534182	0.00636833	2.19597
ITGA5	-0.478992	0.000536878	0.00639592	2.1941
CLPTM1	0.511947	0.000537279	0.00639614	2.19408
ITPRIPL1	-0.460208	0.000538668	0.00640812	2.19327
RRS1	0.465395	0.000539806	0.0064171	2.19266
GP1BA	-0.502552	0.00054174	0.00642184	2.19234
GP5	-0.522696	0.000541217	0.00642474	2.19214
B3GNT5	-0.522443	0.000541723	0.00642619	2.19205
CAPZB	-0.483272	0.000541013	0.00642688	2.192
LBH	-0.421725	0.000543605	0.00643939	2.19116
SUCNR1	-0.551388	0.000544422	0.00644451	2.19081
PET100	0.541881	0.000545612	0.00644492	2.19078
PTPRS	-0.427453	0.000545517	0.00644835	2.19055
CHSY3	0.5204	0.000545257	0.00644983	2.19045
PRAG1	-0.565411	0.000546562	0.00645159	2.19033
PAX8	-0.573082	0.000548902	0.00647464	2.18878
HYOU1	0.459676	0.00054955	0.00647773	2.18858
GIMAP1	-0.488238	0.000552292	0.00650546	2.18672
SH3TC1	-0.442995	0.000556319	0.00654829	2.18387
CLDN3	-0.599824	0.000564131	0.00663557	2.17812
PDZD4	-0.60588	0.00056498	0.00664089	2.17777
PIGT	0.505372	0.000567582	0.0066668	2.17608
ABCC9	-0.585644	0.000569994	0.00668106	2.17515
B4GALT6	-0.468758	0.000570703	0.00668469	2.17492
ITGA4	0.511761	0.000569914	0.0066848	2.17491
GPIHBP1	-0.684919	0.000569673	0.00668667	2.17479
ARPC1B	-0.529143	0.000572832	0.00670025	2.17391
GIMAP5	-0.614343	0.000572493	0.00670097	2.17386
ZBTB7C	-0.559585	0.000574299	0.00671272	2.1731
PBX3	-0.619918	0.000576808	0.00673734	2.17151
UBE2C	-0.444847	0.000581291	0.00678497	2.16845
CYGB	-0.52627	0.000583698	0.00680832	2.16696
ERGIC1	0.43504	0.000585564	0.00682532	2.16588
NME8	-0.583665	0.00058599	0.00682554	2.16586
AUP1	0.437906	0.0005866	0.0068279	2.16571
CD83	-0.561254	0.000588276	0.00683789	2.16508
EGLN3	-0.523966	0.000587879	0.00683802	2.16507
IL1RL1	-0.643771	0.000591167	0.00684772	2.16445
LAMA4	-0.534833	0.000590936	0.00684978	2.16432
PTPRK	0.444807	0.000590832	0.00685333	2.1641
NIBAN2	-0.495819	0.000590425	0.00685335	2.1641
GTPBP10	0.424281	0.00059207	0.00685343	2.16409
VNN3	-0.49889	0.000590374	0.00685751	2.16383
TFR2	-0.483226	0.000595282	0.00688586	2.16204
MYCT1	-0.551999	0.000598174	0.00691453	2.16024
HIST1H3D	-0.282666	0.000599587	0.00692607	2.15951
DCP2	-0.438942	0.000602321	0.00695286	2.15784
PRKCQ	-0.503387	0.000603608	0.00696291	2.15721
ANKRD34A	0.576259	0.000604654	0.00697018	2.15676
SORL1	-0.577443	0.000605598	0.00697625	2.15638
LCT	0.542104	0.000609202	0.00701295	2.1541
GLCCI1	0.507167	0.000609928	0.00701647	2.15388
TPX2	-0.491934	0.000612699	0.00704352	2.15221
PTGES	-0.63731	0.000614452	0.00704431	2.15216
SOCS4	0.436764	0.000613373	0.00704642	2.15203
ALG3	0.502865	0.00061514	0.00704737	2.15197
FLVCR2	-0.509368	0.000614396	0.0070485	2.1519
GPRC5C	-0.476924	0.000614253	0.0070517	2.15171
NIPA2	0.514891	0.000616362	0.00705654	2.15141
MIEF1	0.404789	0.000619764	0.00709064	2.14931
ST6GALNAC3	-0.564482	0.00062058	0.00709513	2.14904
FAM110A	-0.610763	0.000622396	0.00710134	2.14866
SV2C	0.53807	0.000622192	0.00710385	2.14851
VGLL3	-0.584846	0.000622161	0.00710835	2.14823
ARHGDIB	-0.576564	0.000625064	0.00712692	2.1471
PDIA6	0.569333	0.000626656	0.00713535	2.14658
IL1B	-0.552859	0.000627165	0.0071363	2.14653
GABRA2	-0.624663	0.00062652	0.00713866	2.14638
NCLN	0.476045	0.000632574	0.00719295	2.14309
MPZL1	0.459402	0.000636084	0.00722795	2.14098
STK39	-0.43237	0.000637368	0.00723763	2.1404
HIST2H3C	-0.597841	0.000638554	0.00724618	2.13989
MAP1LC3A	-0.503819	0.000647431	0.00733696	2.13448
MRPL32	0.381139	0.000648869	0.00733836	2.1344
TRIP13	-0.575206	0.000648155	0.0073402	2.13429
PTK2	-0.401456	0.000647351	0.00734103	2.13424
HIST2H2AB	-0.507063	0.000648848	0.00734308	2.13412
KIF13A	-0.47983	0.000653151	0.00737682	2.13213
USP2	-0.565934	0.000652716	0.00737688	2.13213
WWC1	-0.542649	0.000654193	0.0073836	2.13173
SYT11	-0.497516	0.000662268	0.0074697	2.1267
PLTP	-0.404257	0.000663676	0.00747551	2.12636
GMIP	-0.630925	0.000663548	0.00747911	2.12615
SNRPN	0.462024	0.000665672	0.00749295	2.12535
ZBTB20	0.4656	0.000667956	0.0075136	2.12415
ZNF43	-0.472311	0.000672512	0.0075547	2.12178
ATIC	0.361457	0.000672107	0.00755522	2.12175
PAQR9	-0.578636	0.000674541	0.00756734	2.12106
TEX13C	0.411139	0.000674407	0.00757091	2.12085
PRTN3	-0.437652	0.000675532	0.00757338	2.12071
RALB	-0.450207	0.000685505	0.00768004	2.11464
KIAA1211	-0.563353	0.0006882	0.00770508	2.11322
FBL	0.5073	0.000689871	0.00771862	2.11246
NRL	0.617465	0.000690746	0.00772325	2.1122
SH2B2	0.465139	0.000692804	0.00774109	2.1112
ANKS6	0.434741	0.000694058	0.00774476	2.11099
HIVEP3	-0.51444	0.000693987	0.00774913	2.11075
CDK1	-0.480615	0.000696119	0.00776259	2.10999
MUC16	-0.578964	0.000697041	0.00776769	2.10971
RARRES2	-0.609887	0.000702536	0.00781332	2.10716
SLAIN1	0.468957	0.000701622	0.00781354	2.10715
HBM	-0.436021	0.000702288	0.00781575	2.10703
CLEC2L	-0.613557	0.000703331	0.00781696	2.10696
ZNF570	-0.511915	0.000704152	0.0078209	2.10674
MAB21L1	0.551009	0.000706969	0.00784698	2.1053
HIST1H1D	-0.488013	0.000709255	0.00786714	2.10418
CASZ1	-0.551277	0.000710127	0.0078716	2.10394
TPPP3	-0.582929	0.000712527	0.00789297	2.10276
NOL6	0.491272	0.000713982	0.00789341	2.10274
CLIP4	-0.439348	0.000715684	0.00789659	2.10256
TRPM2	-0.574847	0.00071392	0.00789795	2.10249
NHSL2	-0.539676	0.000714959	0.00789899	2.10243
FBN2	-0.525748	0.000715617	0.00790106	2.10231
VWF	-0.501024	0.000713784	0.00790167	2.10228
MYF6	0.580183	0.000717486	0.00791125	2.10176
FAM53B	-0.471234	0.000725068	0.00797909	2.09805
PARVA	-0.537027	0.000724592	0.00797909	2.09805
SURF1	0.534582	0.000724174	0.00797974	2.09801
GABBR1	-0.557811	0.000725697	0.00798076	2.09796
PWWP2A	0.42501	0.000727604	0.00799648	2.0971
CPN2	-0.589322	0.000729347	0.00801037	2.09635
TENM1	-0.514552	0.000734745	0.00805909	2.09371
TNFSF12	-0.374468	0.000734272	0.00805918	2.09371
TNFRSF9	-0.578832	0.000737528	0.00808431	2.09236
SEPTIN3	-0.452428	0.000739036	0.00809554	2.09175
COMMD7	-0.503535	0.000745175	0.00815745	2.08845
DMTN	-0.468991	0.000747776	0.00818057	2.08722
CD34	-0.517419	0.000748607	0.00818431	2.08702
COQ8A	0.443614	0.000750365	0.00818749	2.08685
ICAM3	0.455326	0.000750327	0.00819241	2.08659
ARMC3	-0.600083	0.000750236	0.00819677	2.08636
TSPAN14	-0.563475	0.000753724	0.00821344	2.08548
TECR	0.510448	0.000753304	0.0082142	2.08543
GBGT1	-0.42727	0.00076496	0.00833044	2.07933
BPI	-0.557349	0.000769037	0.00836941	2.07731
ZNF846	-0.474246	0.000770816	0.00838331	2.07658
CLEC7A	-0.513012	0.000771781	0.00838836	2.07632
TNFSF14	-0.596781	0.000775128	0.00841926	2.07473
SLC2A14	-0.567514	0.000776129	0.00842468	2.07445
PTX3	-0.503028	0.000777978	0.00843927	2.0737
SKA3	-0.512633	0.000778493	0.00843939	2.07369
C1S	-0.464116	0.000780968	0.00846074	2.07259
SRPRA	0.51823	0.000783107	0.00847843	2.07168
P2RY12	-0.449802	0.000786379	0.00850285	2.07044
MFSD6L	-0.626659	0.000785896	0.00850312	2.07042
PILRA	-0.497253	0.000789247	0.00852835	2.06913
TK1	-0.580389	0.000790576	0.00853169	2.06896
LPAR1	-0.527654	0.000791429	0.00853539	2.06878
CEP120	0.485134	0.000790567	0.0085371	2.06869
CD200R1	-0.475026	0.000792889	0.00854564	2.06826
WDR75	0.335679	0.000795739	0.00857083	2.06698
SLC4A1	-0.453679	0.00079633	0.00857168	2.06693
ABTB2	-0.561001	0.000796938	0.00857271	2.06688
PPP3CC	0.43178	0.000799068	0.00859011	2.066
PPM1N	-0.56106	0.000800518	0.00859466	2.06577
CLASP2	0.517802	0.000802083	0.00859492	2.06576
TCEA3	-0.411468	0.000801589	0.00859513	2.06575
JCAD	-0.576257	0.00080327	0.00859664	2.06567
SYTL3	-0.496235	0.000802771	0.00859679	2.06566
PTGS1	-0.479691	0.000801246	0.00859696	2.06566
NAIP	-0.519024	0.000800265	0.00859746	2.06563
EPHA6	0.451183	0.000803865	0.0085975	2.06563
AC018630.2	0.639056	0.000805978	0.0086146	2.06477
NGLY1	0.410252	0.000807093	0.00862101	2.06444
DSCC1	-0.54045	0.000809394	0.00862358	2.06431
RCN2	0.43154	0.000809927	0.00862376	2.0643
KIF4A	-0.47193	0.000808525	0.0086253	2.06423
LPCAT2	-0.463256	0.000810808	0.00862766	2.06411
NCOA4	-0.458412	0.000809268	0.00862772	2.0641
TMEM209	0.314755	0.000808422	0.0086297	2.064
FAS	-0.498565	0.000812479	0.00863994	2.06349
RNF24	-0.559333	0.00081419	0.00865264	2.06285
LIG3	0.453101	0.000818066	0.00868281	2.06134
PARP1	0.404791	0.000817625	0.00868364	2.0613
MPP5	0.466163	0.000818728	0.00868432	2.06126
TIAM2	-0.58967	0.000820139	0.00868829	2.06107
AKR1E2	-0.469836	0.000819691	0.00868903	2.06103
S100B	-0.56142	0.000821159	0.00869358	2.0608
KIF20A	-0.48099	0.000824725	0.0087148	2.05974
CYP2J2	0.572169	0.00082454	0.00871835	2.05957
TMEM108	0.457721	0.000824145	0.00871969	2.0595
PNMA8B	-0.596649	0.00082773	0.00874104	2.05844
SPCS2	0.500297	0.00082856	0.00874429	2.05828
SULT1C2	-0.576728	0.00082928	0.00874637	2.05817
WASF1	-0.51008	0.000834017	0.00879079	2.05597
CENPA	-0.588708	0.000840617	0.00884921	2.0531
IL36A	0.564199	0.000840498	0.00885352	2.05288
ADGRB3	0.486903	0.000843614	0.0088696	2.0521
TOMM70	0.421571	0.000844289	0.00887113	2.05202
IRF4	0.454249	0.000843427	0.00887321	2.05192
MILR1	-0.430134	0.000846192	0.00888554	2.05132
DNAJB11	0.517729	0.000847769	0.00889652	2.05078
TLR8	-0.508599	0.000848815	0.00890192	2.05052
PHOSPHO1	-0.561923	0.000850229	0.00891117	2.05007
SEC14L4	-0.544783	0.000855606	0.00896192	2.0476
EPHA1	-0.545711	0.000859235	0.00898867	2.0463
CLNK	-0.571589	0.00085923	0.00899424	2.04604
FCAR	-0.578663	0.000861025	0.00900177	2.04567
PRKD3	0.411396	0.000862852	0.009004	2.04556
IL7R	-0.474436	0.000862123	0.00900763	2.04539
NHS	-0.480333	0.000862735	0.0090084	2.04535
TFDP1	-0.4848	0.000864619	0.00901681	2.04495
PPM1J	-0.603989	0.000870349	0.00904839	2.04343
GJB7	0.567457	0.000870156	0.009052	2.04326
CDK20	-0.546672	0.000868758	0.00905435	2.04314
OSBP	0.421211	0.000869961	0.0090556	2.04308
SHC4	0.534409	0.000869959	0.00906122	2.04281
ADCY3	-0.471454	0.000872269	0.00906272	2.04274
ITGB5	-0.419306	0.000876512	0.00908987	2.04144
YIPF2	0.48666	0.000876432	0.00909468	2.04121
HIST2H4A	-0.455555	0.000877768	0.00909726	2.04109
APBB1IP	-0.491579	0.000876365	0.00909962	2.04098
MEI1	0.457266	0.000879373	0.00910826	2.04056
GAL3ST4	-0.571957	0.000880118	0.00911033	2.04047
GNG7	0.345573	0.000882565	0.00912438	2.0398
SEPTIN5	-0.547846	0.000883245	0.00912577	2.03973
GPR18	-0.58054	0.000882158	0.00912581	2.03973
C4BPB	-0.580302	0.000889101	0.00918062	2.03713
TBX22	0.349593	0.00089056	0.00919	2.03668
COLEC10	0.598894	0.000891503	0.00919407	2.03649
TMEM109	0.528341	0.000892808	0.00920186	2.03612
DHX30	0.477709	0.000894474	0.00921336	2.03558
BCL9	0.543909	0.000899274	0.0092571	2.03353
EPRS	0.492111	0.000903794	0.00929791	2.03161
TCF7L1	-0.54897	0.000906521	0.00932024	2.03057
AOX1	-0.600102	0.000911552	0.00936621	2.02844
MS4A2	-0.625022	0.000917364	0.0094086	2.02647
TSPAN15	-0.484057	0.000917201	0.00941269	2.02629
GANAB	0.511063	0.000916838	0.00941475	2.02619
EXOC3L4	-0.513608	0.000922292	0.00945335	2.02441
BMP5	-0.544538	0.000924664	0.00947186	2.02356
CENPE	-0.498084	0.000925518	0.00947481	2.02343
RPLP2	0.530708	0.000927283	0.00948708	2.02287
TNFRSF19	-0.543843	0.000930858	0.00951784	2.02146
ITGA9	-0.566465	0.000931932	0.009523	2.02123
RHOF	-0.434565	0.000936383	0.00956264	2.01942
AUNIP	-0.546432	0.000937428	0.00956748	2.0192
TRIM6-TRIM34	-0.575613	0.000939159	0.00957931	2.01867
ORC1	-0.494814	0.000942264	0.00959928	2.01776
INSR	0.508551	0.000942017	0.00960261	2.01761
ANO5	0.554815	0.000945751	0.00960557	2.01748
SNAPC5	0.38367	0.000944643	0.00960598	2.01746
TMX2	0.404435	0.000945531	0.00960916	2.01731
SSR3	0.549638	0.000944447	0.00960982	2.01728
CD300C	-0.578654	0.000944316	0.00961433	2.01708
PDZRN4	0.445523	0.000953193	0.00966942	2.0146
TBC1D16	-0.493552	0.000953081	0.00967414	2.01439
XAGE1B	0.472505	0.00095701	0.00970227	2.01313
CUTA	0.541072	0.00095828	0.00970925	2.01281
PDE1B	-0.584325	0.000965777	0.00977339	2.00995
ZNF114	-0.611876	0.000965363	0.00977511	2.00988
SH3BP1	-0.507411	0.000967156	0.00978142	2.0096
AJAP1	0.502048	0.000967853	0.00978257	2.00955
ACKR4	0.622004	0.000969924	0.00979758	2.00888
CDKN2A	0.337776	0.000973351	0.00982627	2.00761
ZNF687	0.51208	0.000974104	0.00982794	2.00754
EPC2	0.39652	0.000983693	0.00991871	2.00354
CD300E	-0.501109	0.000986712	0.00994316	2.00248
C12orf10	0.425395	0.000988864	0.00995885	2.00179
ZNRF3	0.519201	0.00099142	0.00997858	2.00093
RGP1	0.442389	0.000993642	0.00999494	2.00022
FBLIM1	-0.573184	0.000997174	0.0100184	1.9992
GINS1	-0.505911	0.000996911	0.0100218	1.99905
NR1H3	-0.516077	0.000999635	0.0100251	1.99891
BMP8A	0.404629	0.00100041	0.0100269	1.99883
LMTK2	0.485766	0.00100117	0.0100285	1.99877
GRM5	0.3368	0.000999461	0.0100294	1.99873
NUP98	0.433304	0.000998935	0.0100301	1.99869
STOX2	-0.454986	0.00100376	0.0100484	1.9979
MPIG6B	-0.523768	0.00100601	0.0100649	1.99719
GPC5	-0.627166	0.00100675	0.0100663	1.99713
C12orf75	-0.467757	0.00101072	0.010094	1.99594
TSPAN3	0.499654	0.00101019	0.0100947	1.99591
PGRMC2	0.574325	0.0010143	0.0101236	1.99466
BCAM	-0.4547	0.00102309	0.0101992	1.99143
NAGK	-0.562402	0.00102264	0.0102008	1.99136
ARHGAP29	-0.551478	0.00102646	0.0102268	1.99026
KIF7	-0.512573	0.00102842	0.0102341	1.98995
GUSB	0.480968	0.00102839	0.0102398	1.98971
RRBP1	0.472043	0.0010323	0.0102544	1.98909
H2AFY	-0.541487	0.00103357	0.0102549	1.98907
ARPIN	-0.572031	0.0010318	0.0102555	1.98904
FFAR2	-0.551338	0.00103149	0.0102585	1.98892
IGFBP6	-0.569829	0.00103336	0.0102588	1.9889
ITGA3	0.436968	0.00103696	0.0102823	1.98791
CALCB	0.593679	0.00104192	0.0103132	1.98661
PPP1R2	0.362333	0.0010407	0.0103133	1.9866
PSTPIP1	-0.530817	0.00104137	0.0103138	1.98658
CRYBG3	0.474778	0.00104596	0.0103471	1.98518
CBX2	-0.531763	0.00105039	0.0103787	1.98386
AKR1B1	-0.34086	0.00105032	0.0103841	1.98363
KCTD1	0.540402	0.00105291	0.0103913	1.98333
SEMA3D	0.507731	0.00105256	0.0103939	1.98322
ZMIZ1	-0.441166	0.00105873	0.010418	1.98222
CCNJL	-0.528019	0.00105773	0.0104204	1.98211
ZDHHC9	0.398241	0.00105853	0.0104221	1.98204
EDAR	-0.615954	0.00105686	0.0104241	1.98196
STAT6	-0.559307	0.00106011	0.0104254	1.98191
AQP1	-0.522824	0.00105771	0.0104263	1.98187
CHD7	0.448011	0.00106092	0.0104273	1.98183
FAM169A	-0.482416	0.00106419	0.0104533	1.98075
FAM20A	-0.542821	0.00106771	0.0104817	1.97957
MAP2	0.393176	0.0010711	0.0105026	1.9787
NUS1	0.435603	0.0010705	0.0105029	1.97869
SOCS5	0.393502	0.00107188	0.0105042	1.97864
LDB2	-0.578664	0.00107676	0.0105396	1.97718
GLDC	-0.395924	0.00107656	0.0105438	1.977
OR1N1	0.502673	0.00108623	0.0106261	1.97363
PAK5	0.377358	0.00108694	0.0106268	1.9736
GPC2	-0.595529	0.00109039	0.0106419	1.97298
TNC	-0.526573	0.00108975	0.010642	1.97298
MBP	-0.485233	0.0010896	0.0106467	1.97279
EMP2	-0.564299	0.0010931	0.0106622	1.97215
SLC25A23	0.419096	0.0010972	0.0106959	1.97078
STT3B	0.517472	0.00109882	0.0107055	1.97039
ASIC4	0.574129	0.00110133	0.0107237	1.96965
RP2	-0.434995	0.00110457	0.0107428	1.96888
PLA2G2D	-0.496458	0.00110444	0.0107477	1.96868
PROSER2	-0.515863	0.0011117	0.0108059	1.96634
CXCR2	-0.504023	0.00111703	0.0108514	1.96452
PLAAT2	0.510334	0.00112437	0.01091	1.96218
CCR1	-0.498282	0.00112383	0.0109111	1.96213
NLRP3	-0.510715	0.00112909	0.0109494	1.96061
CXCL3	-0.491117	0.00113168	0.0109618	1.96012
AKAP6	0.567168	0.00113109	0.0109625	1.96009
MMP2	-0.442838	0.00113376	0.0109757	1.95957
PTK2B	0.494201	0.00113543	0.0109855	1.95918
TBX6	0.569417	0.00113755	0.0109933	1.95887
OSBPL1A	-0.475608	0.0011369	0.0109933	1.95887
SVOP	0.391242	0.00113984	0.0110091	1.95825
C20orf194	-0.538697	0.00114545	0.0110505	1.95662
FOXP1	-0.47784	0.00114501	0.0110526	1.95654
PANX2	-0.510393	0.0011479	0.0110677	1.95594
BPIFB1	-0.671317	0.00115147	0.0110957	1.95485
PROM1	-0.558237	0.00115771	0.0111431	1.953
CMTM5	-0.506965	0.0011576	0.0111484	1.95279
TRIO	-0.506124	0.00116049	0.011157	1.95245
EPM2AIP1	0.442749	0.00116042	0.0111627	1.95223
MKI67	-0.574132	0.00116396	0.0111839	1.95141
ADCY4	-0.598925	0.00116837	0.0112198	1.95002
CCNA2	-0.406848	0.00117125	0.0112411	1.94919
SOCS6	-0.458958	0.0011732	0.0112533	1.94872
ETS1	-0.526093	0.00117472	0.0112614	1.94841
CDV3	0.572956	0.00117715	0.0112718	1.94801
PODXL2	-0.43103	0.00117665	0.0112735	1.94794
TANGO2	-0.450255	0.00118482	0.0113323	1.94568
EBI3	-0.546312	0.00118436	0.0113343	1.9456
MRPS24	0.593253	0.00119055	0.0113806	1.94384
TMEM161A	0.418215	0.00119209	0.0113888	1.94352
TPM3	-0.533212	0.00119605	0.0114201	1.94233
POMC	-0.478875	0.00120576	0.0115063	1.93906
RGS1	-0.354034	0.00120666	0.0115083	1.93899
MSI2	0.45579	0.00120917	0.0115256	1.93834
C6orf120	0.481584	0.00121131	0.0115264	1.93831
ZNF593	0.382532	0.00121106	0.0115305	1.93815
2023-03-01	-0.422036	0.001211	0.0115365	1.93793
PFKFB4	-0.44808	0.0012155	0.0115531	1.9373
NDRG1	0.413485	0.00121507	0.0115556	1.93721
ZNF503	-0.51915	0.00121981	0.0115875	1.93601
DDAH2	-0.470875	0.00122239	0.0115988	1.93559
TTC17	0.437688	0.00122184	0.0116002	1.93553
TMEM268	0.470373	0.00122412	0.0116087	1.93522
HOXB2	-0.4862	0.00122677	0.0116207	1.93477
KREMEN2	-0.584243	0.00122665	0.0116261	1.93457
CD244	-0.428015	0.00123366	0.0116793	1.93258
OR52D1	0.42742	0.00123502	0.0116856	1.93235
SUSD1	-0.553534	0.00123886	0.0117152	1.93125
THRB	-0.5054	0.00124143	0.011733	1.93059
PKDCC	-0.519174	0.00124579	0.0117609	1.92956
APBA2	-0.440437	0.00124567	0.0117663	1.92936
AUTS2	-0.385281	0.00124903	0.0117848	1.92868
PLVAP	-0.510031	0.00125183	0.0117979	1.92819
LSAMP	0.525924	0.00125177	0.011804	1.92797
TXNDC5	0.500473	0.00125507	0.0118218	1.92732
C6orf89	0.468324	0.00125662	0.0118298	1.92702
ZNF805	0.427943	0.0012683	0.011933	1.92325
CMTM2	-0.423972	0.00127229	0.0119571	1.92237
SAMD14	-0.612297	0.00127209	0.0119619	1.9222
MYBL2	-0.474796	0.00127544	0.01198	1.92154
MGP	-0.530102	0.00127756	0.0119932	1.92107
CXCL1	-0.508886	0.00128169	0.0120185	1.92015
ACTB	-0.470691	0.0012811	0.0120197	1.92011
SLC5A6	0.425247	0.00128369	0.0120305	1.91972
PALM	-0.564871	0.00128586	0.0120441	1.91923
PYHIN1	-0.45523	0.00128778	0.0120553	1.91882
OLFML2B	-0.556099	0.0012888	0.0120581	1.91872
FOSL2	-0.564475	0.00129452	0.0120913	1.91753
SHMT1	-0.399224	0.00129437	0.0120967	1.91733
TMEM41A	0.426142	0.00129369	0.0120971	1.91732
NBPF6	0.51712	0.00131095	0.0121836	1.91422
MFAP4	-0.526865	0.00130667	0.0121844	1.9142
ACSL6	-0.455468	0.00130962	0.0121848	1.91418
CIRBP	0.479724	0.00130822	0.0121853	1.91417
IRAK1BP1	0.457155	0.00131054	0.0121866	1.91412
HBQ1	-0.512803	0.00131219	0.0121883	1.91406
RIC1	0.44671	0.00130636	0.0121883	1.91406
NFIX	-0.468522	0.00130955	0.0121909	1.91397
SOCS3	-0.44593	0.00130816	0.0121915	1.91394
GAD1	-0.557606	0.00130636	0.0121951	1.91382
PDLIM7	-0.598538	0.00131743	0.0122303	1.91256
FAXC	-0.579108	0.00131986	0.0122392	1.91225
PRSS21	-0.501728	0.0013195	0.0122427	1.91212
LRRC8A	0.493618	0.00132477	0.0122711	1.91112
CLEC14A	-0.553001	0.00132436	0.0122741	1.91101
DCAF1	0.471653	0.00132928	0.0122993	1.91012
BCL9L	-0.534018	0.00132855	0.0122994	1.91012
TYMS	-0.429553	0.00133294	0.0123264	1.90916
MARCO	-0.537548	0.0013349	0.0123309	1.90901
VWC2L	0.562957	0.00133452	0.0123341	1.90889
VAMP5	-0.470181	0.00134121	0.0123823	1.9072
SLC35D3	-0.599785	0.00134459	0.0124067	1.90634
SCAMP5	0.444098	0.0013469	0.0124212	1.90584
AL162231.1	0.569404	0.0013491	0.0124346	1.90537
GNLY	-0.490569	0.00135138	0.0124488	1.90487
DENND2A	-0.487322	0.00135447	0.0124704	1.90412
MIER3	0.375425	0.00135546	0.0124726	1.90404
MPDZ	-0.530577	0.00135741	0.0124769	1.90389
FUT6	-0.506852	0.00135735	0.0124832	1.90368
MAF	-0.484972	0.00136067	0.0124931	1.90333
LRRC75A	-0.623571	0.00136025	0.0124961	1.90323
PIK3R5	-0.487683	0.00137173	0.0125877	1.90005
SLCO4A1	0.413116	0.00137558	0.0126161	1.89907
WSB1	-0.526831	0.00138037	0.0126532	1.8978
ENKUR	-0.55838	0.00138261	0.0126667	1.89734
COL6A1	-0.439934	0.00139071	0.012734	1.89504
CAMK1	-0.609235	0.00139301	0.0127481	1.89455
WDR36	0.333992	0.00139399	0.0127501	1.89449
DIPK2B	-0.554181	0.00139782	0.0127781	1.89353
PLK1	-0.388006	0.0014008	0.0127914	1.89308
RNF167	0.327007	0.00140048	0.0127954	1.89295
DUSP3	-0.523122	0.00140578	0.0128298	1.89178
RTBDN	0.490604	0.00140665	0.0128308	1.89175
CDKL4	0.619327	0.00140905	0.0128456	1.89124
UTP25	0.381247	0.00141906	0.0128948	1.88959
LAT2	-0.460263	0.0014178	0.0128973	1.8895
RPS19	0.565218	0.00141861	0.0128977	1.88949
HEY2	0.533251	0.00141761	0.0129026	1.88932
FCMR	-0.441325	0.00141637	0.0129054	1.88923
AIG1	0.471298	0.00141728	0.0129067	1.88919
TBC1D2	-0.439789	0.00142201	0.0129076	1.88915
PSD3	-0.500891	0.00142181	0.0129128	1.88898
ALDH1A2	-0.526953	0.00142806	0.0129555	1.88755
TPM1	-0.472082	0.00143411	0.0130033	1.88595
CAT	-0.465228	0.00143531	0.0130071	1.88582
PELI1	0.485809	0.00144026	0.013045	1.88456
EVL	-0.542442	0.0014425	0.0130582	1.88412
FCER2	-0.478484	0.00144354	0.0130605	1.88404
ST3GAL1	-0.523611	0.00144724	0.0130798	1.8834
ARFIP2	0.486763	0.00144671	0.0130821	1.88332
CAVIN2	-0.464304	0.00145035	0.0131009	1.8827
LTC4S	-0.478705	0.00145263	0.0131144	1.88225
MT1F	-0.474357	0.00145576	0.0131356	1.88155
PRKCH	-0.428081	0.00145957	0.0131558	1.88088
AC090517.4	0.533281	0.00145945	0.0131618	1.88068
RNF103	0.385165	0.00146171	0.013168	1.88048
MAGEE2	0.429031	0.00146461	0.013187	1.87985
BSCL2	0.490331	0.00146705	0.0132019	1.87936
UBL7	0.431559	0.00146967	0.0132183	1.87882
DOK4	-0.454706	0.00147443	0.0132541	1.87765
SLC39A8	0.474641	0.00148651	0.0133483	1.87457
NEK6	-0.428793	0.00148587	0.0133497	1.87453
IFIT1B	-0.512697	0.00149628	0.0134216	1.87219
CCR4	-0.517896	0.00149601	0.0134264	1.87204
EFEMP2	-0.388365	0.00150105	0.01345	1.87128
RIPK3	-0.482735	0.00150287	0.0134519	1.87122
HOMER2	0.394997	0.00150218	0.0134529	1.87118
CSF1	-0.4958	0.00150079	0.0134549	1.87112
DDA1	0.390282	0.00150886	0.0134982	1.86972
GP9	-0.441197	0.0015114	0.0135138	1.86922
FUT4	-0.478566	0.00151485	0.0135374	1.86846
SMIM24	-0.543238	0.00152144	0.0135818	1.86704
KIF14	-0.4886	0.00152091	0.0135843	1.86696
IQSEC2	-0.421917	0.00153132	0.0136627	1.86446
CREB3L2	0.467238	0.00153643	0.013701	1.86325
TAX1BP3	-0.389272	0.00153922	0.0137186	1.86269
GBP4	-0.451767	0.00154601	0.0137571	1.86147
TRABD2B	-0.58566	0.00154439	0.0137573	1.86147
CTNNA3	0.51156	0.00154563	0.013761	1.86135
HIST1H4B	-0.409286	0.00155437	0.0138242	1.85936
RAP2A	-0.396836	0.00156491	0.013881	1.85758
SCARF1	-0.498975	0.00156342	0.0138825	1.85753
KIF2C	-0.460132	0.00156446	0.0138844	1.85747
RTN4RL1	-0.586499	0.00156286	0.0138849	1.85746
MAX	-0.421294	0.0015621	0.0138855	1.85744
COX19	-0.520838	0.00156748	0.0138891	1.85733
ST3GAL5	0.353499	0.00156677	0.0138901	1.85729
RPRD2	0.474985	0.00156969	0.0139013	1.85694
CLEC4C	-0.585354	0.00157293	0.0139227	1.85628
PKHD1	0.424923	0.00157429	0.0139273	1.85613
BST2	0.418785	0.00158087	0.0139781	1.85455
FOXM1	-0.484145	0.001584	0.0139984	1.85392
POLR1B	0.374075	0.00158685	0.0140162	1.85337
TCF7	-0.482693	0.00159052	0.0140412	1.8526
TMEFF1	0.503706	0.00159395	0.0140641	1.85189
UBA52	0.536488	0.00159911	0.0140947	1.85094
DCAF16	0.476312	0.0015991	0.014102	1.85072
MMRN1	-0.480109	0.00160088	0.0141029	1.85069
CANX	0.510688	0.00160623	0.0141426	1.84947
ZNF703	-0.455698	0.00160736	0.0141451	1.84939
CXCR1	-0.536793	0.00160911	0.0141457	1.84938
PARP16	0.267207	0.00160885	0.0141507	1.84922
ZNF302	0.360776	0.00161185	0.0141622	1.84887
MKX	0.433985	0.00161642	0.014195	1.84787
ANGPT1	-0.42949	0.0016174	0.0141962	1.84783
PGBD5	-0.478253	0.0016233	0.0142256	1.84693
FEZ2	-0.395429	0.00162253	0.0142263	1.84691
EGFR	-0.504637	0.0016223	0.0142317	1.84674
ALG2	0.511491	0.00163855	0.0143517	1.8431
SEPTIN4	-0.388671	0.00164428	0.0143944	1.84181
SFXN4	0.31358	0.00165094	0.0144451	1.84028
TAS2R4	0.520649	0.00165209	0.0144476	1.8402
FYN	-0.463395	0.00165434	0.0144597	1.83984
RBMS2	-0.526423	0.00165616	0.0144605	1.83982
MINDY2	0.431979	0.00165822	0.0144634	1.83973
TSPAN7	0.498244	0.00165736	0.0144634	1.83973
IL6	-0.459355	0.001656	0.0144667	1.83963
SVEP1	-0.545669	0.00166289	0.0144966	1.83874
SLC46A2	-0.528533	0.00167056	0.0145559	1.83696
MICU3	-0.501653	0.00167156	0.014557	1.83693
HOXA10	-0.419125	0.00168135	0.0146119	1.83529
ZNF365	-0.55182	0.00168097	0.0146161	1.83517
DZIP1	-0.548397	0.00168371	0.0146172	1.83514
FOXD1	-0.485561	0.00168301	0.0146187	1.83509
THEMIS2	-0.497283	0.00168047	0.0146194	1.83507
GABRA4	0.44533	0.00167972	0.0146204	1.83504
NCKAP1	0.388602	0.001688	0.0146469	1.83426
SLC7A1	0.433423	0.00168911	0.0146488	1.8342
PCDHB6	0.502594	0.0016912	0.0146594	1.83388
WDR54	0.346972	0.00169663	0.0146988	1.83272
CSGALNACT2	-0.494141	0.00169921	0.0147136	1.83228
ZNF16	0.314859	0.0017019	0.0147216	1.83204
CD44	-0.453416	0.00170113	0.0147226	1.83201
B3GALNT1	-0.485627	0.00170454	0.0147369	1.8316
PKM	-0.458106	0.00170893	0.0147672	1.8307
TMEM170B	-0.458842	0.00171535	0.0148151	1.8293
MS4A4E	-0.575705	0.00171845	0.0148341	1.82874
PTPRN	-0.576765	0.00172493	0.0148824	1.82733
ECM2	-0.595862	0.00172686	0.0148914	1.82706
YBX3	-0.397379	0.00173276	0.0149346	1.82581
ENAH	0.405052	0.00173444	0.0149413	1.82561
KLF4	-0.436262	0.00174705	0.0150191	1.82336
HPGD	-0.512703	0.00174475	0.0150224	1.82326
RNF14	0.347917	0.00174583	0.015024	1.82321
SPTA1	-0.423725	0.00174695	0.0150259	1.82316
UBE2E1	0.376562	0.00175026	0.0150389	1.82278
MCFD2	0.41368	0.00175318	0.0150563	1.82228
CALCRL	0.524179	0.00175586	0.0150715	1.82184
ZNF793	-0.529727	0.00176068	0.0151052	1.82087
RFT1	0.394723	0.00176504	0.0151116	1.82069
DMD	-0.440236	0.00176327	0.015112	1.82068
FERMT3	-0.550385	0.00176436	0.0151136	1.82063
ESM1	-0.504821	0.00176278	0.0151155	1.82058
STON2	-0.432962	0.00177084	0.0151535	1.81949
HTR2C	0.317648	0.00177521	0.0151754	1.81886
CCL5	-0.499886	0.00177431	0.0151755	1.81886
RMDN3	0.574444	0.00178093	0.0152088	1.8179
PLXNA4	-0.501914	0.0017809	0.0152163	1.81769
PIP4K2A	-0.484309	0.0017845	0.0152315	1.81726
LTBR	-0.3985	0.00178861	0.0152432	1.81692
F2RL3	-0.510043	0.00178686	0.0152439	1.8169
TGFBR3	-0.401608	0.00178831	0.0152484	1.81677
HOXB3	-0.499781	0.00179018	0.0152489	1.81676
CDR2L	-0.549446	0.001793	0.0152651	1.8163
JMY	0.57344	0.0017944	0.0152693	1.81618
GYG2	-0.571324	0.00179663	0.0152805	1.81586
CCL25	-0.548651	0.00180227	0.0153207	1.81472
KIAA1841	-0.43767	0.00180399	0.0153275	1.81453
TBL2	0.327499	0.00180572	0.0153344	1.81433
PAQR8	-0.500814	0.00180838	0.0153492	1.81391
FKBP1C	-0.446986	0.00181261	0.015354	1.81378
RIMS2	0.506432	0.00181204	0.0153569	1.8137
PVR	-0.557986	0.00181038	0.0153584	1.81365
KCNJ15	-0.492414	0.00181134	0.0153588	1.81364
GPR160	0.515601	0.00181613	0.015376	1.81316
NLRC3	-0.522791	0.00182282	0.0154248	1.81178
SUPV3L1	0.366186	0.00182915	0.0154706	1.81049
DSCAM	-0.516026	0.00183682	0.0155276	1.8089
ZC2HC1B	0.455612	0.0018453	0.0155836	1.80733
CR1L	-0.395366	0.0018465	0.0155859	1.80727
B3GNT8	-0.391485	0.00184493	0.0155883	1.8072
EMID1	-0.55544	0.00185054	0.0156121	1.80654
ODR4	0.379687	0.00185516	0.0156432	1.80568
SIPA1L2	-0.521145	0.00186113	0.0156856	1.8045
COL4A1	-0.519721	0.00186682	0.0157256	1.80339
FNBP1	-0.424953	0.0018681	0.0157285	1.80331
ROBO4	-0.549765	0.00187003	0.0157369	1.80308
TMCO1	0.452255	0.00187423	0.0157643	1.80233
APCDD1	-0.514825	0.00187688	0.0157786	1.80193
ARPP21	-0.500461	0.00188025	0.015799	1.80137
SLC16A8	0.503585	0.00188133	0.0158001	1.80134
TMEM245	0.410088	0.00188791	0.0158475	1.80004
PRKCSH	0.502013	0.00189433	0.0158934	1.79878
FBLN5	-0.521813	0.00190665	0.0159887	1.79619
PABPC4	0.468956	0.00190892	0.0159997	1.79589
CCDC85C	0.478098	0.00191121	0.0160109	1.79558
TTC19	0.436453	0.00191849	0.0160639	1.79415
[truncated: 14,739 more rows]

## Sheet: SMM_vs_NDMM
GENE	Mean_Diff_zScore_(NDMM-SMM)	p_value	q_value	Minus_Log(q_value)
SERPINB10	-0.536002	0.000196285	0.0864584	1.06319
RAB3IL1	-0.539448	0.00017679	0.0870325	1.06032
ESPN	-0.521259	0.000194168	0.0878374	1.05632
OR1J2	0.575339	0.000110647	0.0881912	1.05457
AC073111.4	0.519714	0.000174966	0.0887446	1.05186
RAG2	-0.510176	0.000116676	0.0887696	1.05174
CD24	-0.557341	0.00019303	0.0897481	1.04697
MCF2L	-0.480425	0.000171765	0.0898437	1.04651
HLA-DPB1	-0.53871	0.000187915	0.0898664	1.0464
PTCRA	-0.519855	0.000125405	0.0912622	1.03971
BHMT2	0.557097	0.000109689	0.0917985	1.03716
EFHC2	-0.531365	0.000170611	0.0921188	1.03565
CDCA7	-0.515447	0.00022106	0.0925026	1.03385
LYZ	-0.558603	0.000166229	0.0927446	1.03271
ZC3H6	-0.474137	0.000138578	0.092781	1.03254
MPO	-0.509103	0.000106083	0.0934539	1.0294
ZNF787	0.524978	0.000217831	0.0934887	1.02924
DNTT	-0.526257	0.000100575	0.0935237	1.02908
OR6A2	0.521052	0.000281928	0.0943783	1.02513
TRPV4	-0.564843	0.000163715	0.0944919	1.02461
STK32B	-0.520298	0.000158347	0.0946574	1.02385
RAB32	-0.575018	0.000290155	0.0952277	1.02124
PSG1	0.54077	0.000137189	0.0956776	1.01919
CLEC12A	-0.577216	0.000154663	0.0958796	1.01827
TRIM10	-0.517568	9.77e-05	0.0962067	1.01679
TEX13C	0.470577	0.000281763	0.0962478	1.01661
EBF1	-0.523754	9.22e-05	0.096429	1.01579
SPZ1	0.531626	8.68e-05	0.0968675	1.01382
ADRA2B	0.521151	0.000515508	0.0969503	1.01345
TMEM140	0.467289	0.000383843	0.0973449	1.01169
S100A9	-0.491731	0.000512579	0.0974949	1.01102
OR2B2	0.50664	0.000542244	0.0975923	1.01058
OR2D2	0.492324	0.000536627	0.0976312	1.01041
SIGLEC9	-0.572243	0.000151673	0.0976426	1.01036
PTGER4	-0.53209	0.000280298	0.0977422	1.00992
MRO	-0.532047	0.000304194	0.0979153	1.00915
S100A8	-0.492941	0.000534658	0.0983418	1.00726
BRD3OS	0.494064	0.000340854	0.0983658	1.00716
CARD6	-0.566487	0.000382337	0.0984546	1.00676
PSG7	0.496147	0.000511813	0.0984681	1.0067
CTSG	-0.483739	0.000241254	0.0984903	1.00661
DMTN	-0.467171	0.000336115	0.0986997	1.00568
SGK3	-0.446932	0.00050817	0.0989041	1.00479
HLA-DRA	-0.487909	0.000556343	0.0990646	1.00408
PRR33	0.499061	0.000503577	0.0991632	1.00365
PLA2G7	-0.575724	0.000278887	0.0993194	1.00297
VAT1L	-0.459854	0.00049265	0.0993491	1.00284
ZBTB18	-0.522925	0.0005342	0.0993493	1.00284
PCSK2	-0.483818	0.000498725	0.0993768	1.00271
SPTA1	-0.470477	0.000463564	0.099476	1.00228
PLEKHF2	-0.552785	0.000381552	0.0997878	1.00092
FABP3	-0.543474	0.000334467	0.0999697	1.00013
TNFSF12	-0.492442	0.000651374	0.100025	0.999893
ABCA13	-0.494331	0.000490439	0.100109	0.999525
SLC22A16	-0.488009	0.00048467	0.100153	0.999335
MS4A3	-0.492307	0.000329449	0.10026	0.998871
ANKRD30A	0.497936	0.00046191	0.100408	0.99823
KLF1	-0.507507	0.000263949	0.100409	0.998229
AC116366.3	0.504687	0.000270052	0.100447	0.998062
FOXO6	-0.491006	0.000636274	0.100471	0.997958
BAHCC1	-0.454603	0.000648606	0.100522	0.997739
KREMEN1	-0.515131	0.000480729	0.10058	0.997486
RHOBTB1	-0.497139	0.000380012	0.100963	0.99584
SPRY2	-0.559694	0.000277471	0.100963	0.995837
SLC1A3	-0.570167	0.000356226	0.10106	0.995423
BEND7	-0.50255	0.000459101	0.101111	0.995202
2023-03-01	-0.532124	0.000634954	0.101218	0.994744
RNASE2	-0.576863	0.000260316	0.10133	0.994264
H2AFX	0.417512	0.000647782	0.101332	0.994252
GPR141	-0.503623	0.00041179	0.101361	0.99413
TUBA3D	0.510069	0.000405992	0.101425	0.993854
SPINT2	-0.50881	8.49e-05	0.10145	0.993747
TMEM71	-0.569265	0.000376316	0.101593	0.993135
TNFAIP8L1	0.476222	0.000321816	0.101633	0.992964
PTH2R	-0.471707	0.000455507	0.101657	0.992862
ANKRD18A	-0.490049	0.000479815	0.10166	0.992849
RFLNB	-0.498564	0.000443666	0.101727	0.992563
CD82	-0.471431	0.000577924	0.101824	0.992149
CD22	-0.501832	0.000255573	0.101852	0.992031
BPI	-0.51794	0.000627171	0.101918	0.991748
CIITA	-0.465224	0.000633322	0.101928	0.991705
IL4R	-0.519279	0.000329164	0.102029	0.991278
PIK3CD	-0.456777	0.000451518	0.102129	0.990853
TC2N	-0.475497	0.000585822	0.10214	0.990802
ZNF316	0.524428	0.000372314	0.10216	0.990717
MS4A1	-0.473555	0.000441116	0.102547	0.989076
MME	-0.535344	0.000626152	0.10275	0.988217
DDX53	0.377611	0.00059591	0.102828	0.987887
MT-ATP8	0.47748	0.00062125	0.102955	0.987351
GIMAP4	-0.569653	0.000603	0.10299	0.987205
NUCKS1	-0.446547	0.000370124	0.103252	0.986101
PSG2	0.482231	0.000678692	0.103272	0.986016
PTTG1	0.504231	0.0004337	0.103704	0.984206
PKIB	-0.49747	0.000440537	0.103855	0.983573
AIF1	-0.52999	0.000620964	0.103937	0.98323
SLCO1B1	0.429856	0.00073563	0.104347	0.981519
CEBPE	-0.464461	0.000704675	0.104379	0.981386
PLAGL1	-0.474069	0.000692794	0.104468	0.981015
KANTR	0.509491	0.000430689	0.104476	0.980982
TTC39C	-0.508295	0.000731108	0.104592	0.980501
TMEM156	-0.481434	0.000619584	0.104753	0.979832
AFF3	-0.525329	8.14e-05	0.104761	0.979799
ITGAD	-0.493235	0.000723137	0.105251	0.977774
MMP8	-0.466508	0.000729517	0.105264	0.977719
ALDH1A1	-0.545758	0.000704591	0.105299	0.977577
LRRC73	0.475629	0.000719407	0.105627	0.976227
SLC4A1	-0.448614	0.000781078	0.10629	0.973507
NYNRIN	-0.477521	0.000776557	0.106541	0.972483
CNTNAP3C	-0.47042	0.000802433	0.106596	0.972258
RAB6B	-0.470711	0.000772776	0.106898	0.971028
KIF13A	-0.505877	0.000799247	0.107022	0.970525
PYGL	-0.472174	0.000795792	0.107419	0.968919
CDA	-0.545043	0.000772366	0.107732	0.967654
CYTH3	-0.464074	0.000818068	0.107818	0.967311
CPXCR1	0.459333	0.000766952	0.107876	0.967075
SLC40A1	-0.563332	7.82e-05	0.109031	0.96245
FCGRT	-0.446055	0.000845275	0.110533	0.956508
KLHL35	0.588539	7.33e-05	0.111607	0.952309
CAMP	-0.478211	0.000871464	0.113074	0.946637
TSSK6	0.568568	6.78e-05	0.113498	0.94501
CBX8	0.565703	5.43e-05	0.113569	0.944739
S1PR5	-0.435322	0.00089492	0.114345	0.941784
NACC1	0.427004	0.000901809	0.114352	0.941756
SPNS3	-0.45473	0.000888829	0.11444	0.941422
CLDN19	0.660996	4.82e-05	0.115167	0.938672
C1QC	-0.50553	0.000917614	0.115481	0.937488
VNN2	-0.504162	0.000993331	0.11876	0.925331
ERBB3	0.560849	6.4e-05	0.118997	0.924464
AL662899.1	-0.454803	0.000991178	0.119355	0.92316
ADGRE3	-0.485254	0.000960596	0.119988	0.92086
SDS	0.446294	0.000989782	0.12005	0.920636
MAGEA3	0.392682	0.000979921	0.120602	0.918644
LTF	-0.428816	0.000987602	0.120661	0.918435
RHAG	-0.47863	0.000977506	0.121196	0.916511
SLC7A5	0.443254	0.00102976	0.122242	0.912779
DACH1	-0.488539	0.00106413	0.122837	0.910671
CFP	-0.466418	0.00109447	0.122948	0.910279
RBP7	-0.543065	0.00105872	0.123062	0.909876
ATP6V0D2	-0.436187	0.00108921	0.123184	0.909445
LSMEM2	0.469084	0.00108212	0.123214	0.90934
RFX8	-0.407607	0.00104607	0.123303	0.909026
MS4A6A	-0.465792	0.00107619	0.123378	0.908761
ELANE	-0.473246	0.00135707	0.123449	0.908513
VSTM1	-0.46886	0.00105705	0.123726	0.907538
FRMD4A	-0.439962	0.001355	0.123934	0.906809
TMEM176A	-0.496971	0.00121551	0.124056	0.906383
HDGFL3	-0.479282	0.00134967	0.124125	0.906141
LRRC63	-0.395575	0.0012556	0.124357	0.90533
SMIM3	-0.465357	0.00112224	0.124398	0.905188
MKI67	0.421637	0.00134533	0.124409	0.905147
GAPT	-0.471884	0.00121186	0.124443	0.905031
FTCD	0.455426	0.0012651	0.12456	0.90462
OR5B21	0.492177	0.00111655	0.124592	0.904511
NLRP12	-0.462388	0.0013407	0.12467	0.904237
TAL1	-0.446569	0.0011621	0.124687	0.904177
RHOU	-0.476562	0.00143834	0.124741	0.903991
RTL8C	0.531981	0.00132689	0.124773	0.903881
STPG3	0.483902	0.00113326	0.124793	0.90381
GLUL	-0.422888	0.00120806	0.124818	0.903724
FCGR3A	-0.487492	0.00118649	0.124903	0.903428
ZNF195	0.424081	0.00143279	0.124907	0.903414
OGN	0.473045	0.00133586	0.124914	0.90339
PID1	-0.484064	0.0011949	0.125001	0.903087
HMOX1	-0.452578	0.00131441	0.125003	0.903079
GATA1	-0.445042	0.00120253	0.125018	0.903027
GRK3	-0.48227	0.00125525	0.125062	0.902874
NR3C2	-0.426181	0.00129327	0.125125	0.902655
TNFSF13B	-0.512389	0.00130084	0.125135	0.902622
GPR137B	-0.506056	0.00132339	0.125146	0.902582
ACVRL1	-0.456332	0.00145088	0.125179	0.902467
KLHL36	-0.416784	0.00140602	0.12518	0.902464
PLAC8	-0.481634	0.00142984	0.125302	0.902044
SH3BP4	-0.451339	0.00128041	0.12533	0.901944
SESN2	0.448337	0.00141585	0.125389	0.90174
ACP4	0.497302	0.0011837	0.125397	0.901713
SELENBP1	-0.445261	0.00140098	0.125399	0.901707
KCNE3	-0.496623	0.0014613	0.125432	0.901591
TLR2	-0.495418	0.00116172	0.125451	0.901527
TUBB4B	0.437675	0.00128914	0.125452	0.901524
OR2W3	-0.437364	0.00138712	0.1255	0.901355
GFI1B	-0.440357	0.00124571	0.125607	0.900986
PPP4R3C	0.374478	0.00139589	0.125615	0.900958
BEX3	-0.454364	0.00131337	0.125618	0.900948
RAB20	-0.494551	0.00117855	0.125647	0.900847
ANK1	-0.393267	0.00125397	0.125683	0.900725
SAA1	0.458051	0.00142772	0.125775	0.900405
MLC1	-0.480162	0.00116046	0.126129	0.899185
IRF8	-0.465431	0.00161356	0.126205	0.898924
KEL	-0.42837	0.00115439	0.126289	0.898634
GNAQ	-0.487237	0.00124518	0.126314	0.89855
SLC25A18	0.454515	0.00161021	0.126534	0.897793
EPHB6	-0.441275	0.001628	0.126742	0.897081
RAG1	-0.442278	0.00159866	0.126817	0.896822
ETS2	-0.467487	0.00160766	0.126929	0.896438
RUBCNL	-0.479514	0.00166256	0.127068	0.895964
PON1	0.430428	0.0016487	0.12717	0.895615
VCAM1	-0.451455	0.00159852	0.12741	0.894798
MNDA	-0.478991	0.00164438	0.127424	0.894748
TESC	-0.477643	0.00166032	0.127479	0.894561
AXL	-0.456596	0.0015316	0.127542	0.894346
NXPH4	0.451302	0.00167661	0.127559	0.894288
VANGL2	-0.449005	0.00158642	0.127661	0.893942
GFRA2	-0.484085	0.0015483	0.127662	0.893937
PAGR1	0.45276	0.00149521	0.127688	0.893851
GABRB3	-0.433521	0.001596	0.127817	0.89341
MAGEB2	0.363988	0.00168906	0.127925	0.893045
SOX6	-0.415068	0.00152154	0.127978	0.892866
CLEC17A	-0.420952	0.00150694	0.128037	0.892666
LGALS12	-0.461552	0.00156854	0.128069	0.892556
RASGRP4	-0.475004	0.0015309	0.128121	0.892379
EPOP	0.447419	0.00154675	0.128166	0.892228
B4GALT6	-0.456561	0.00158577	0.128225	0.892027
FAM47A	0.453366	0.00151878	0.128391	0.891467
TTC9B	0.589804	3.84e-05	0.128436	0.891313
TRIM58	-0.429058	0.00156574	0.128467	0.891207
ERICH6B	0.448433	0.00158565	0.128838	0.889957
DENND5A	-0.449237	0.0017155	0.129343	0.888258
SWAP70	-0.469994	0.00177154	0.131203	0.882055
IGLL1	-0.45699	0.00176467	0.131276	0.881816
IL31RA	-0.45119	0.00176336	0.131764	0.880203
WNK2	-0.412248	0.00176229	0.132275	0.878523
PPARG	-0.636002	4.76e-05	0.132883	0.876532
PRTN3	-0.571366	7.99e-06	0.133711	0.873833
CD244	-0.484137	0.00183841	0.133788	0.873582
CSF3R	-0.428416	0.00183595	0.134193	0.872271
DPF1	0.430688	0.00182102	0.134274	0.872007
DNAH3	0.448132	0.00201629	0.134457	0.871417
C1orf198	-0.486375	0.00183234	0.134516	0.871225
SSC4D	0.463851	0.00201601	0.134976	0.869744
GPR32	0.457273	0.0020005	0.135018	0.869609
EDARADD	-0.561589	2.42e-05	0.135188	0.869063
SLC24A5	0.429892	0.00201501	0.135451	0.868218
HLA-DMB	-0.494144	0.00200049	0.135563	0.867858
DCAF8L1	0.418503	0.00198249	0.135996	0.866475
AZU1	-0.40092	0.0018779	0.13607	0.866236
UGP2	-0.424173	0.00200044	0.136111	0.866106
SEC14L5	-0.420955	0.00190298	0.13612	0.866078
SCML4	-0.435698	0.00195303	0.136207	0.865799
PLEKHG3	-0.470467	0.00188861	0.136257	0.865642
PBX1	-0.426061	0.00198029	0.136404	0.865174
ARPIN-AP3S2	-0.477799	0.00196403	0.136406	0.865166
AP000781.2	-0.463542	0.00189945	0.136451	0.865024
GIMAP7	-0.517534	0.00200008	0.136642	0.864416
ARPP21	-0.41399	0.0019432	0.136661	0.864357
RASGRP2	-0.411319	0.00195261	0.136748	0.86408
MUC2	0.4585	0.00192001	0.136754	0.864061
NKG7	-0.464409	0.00197865	0.136854	0.863744
AKR1E2	-0.441738	0.00193824	0.136887	0.863638
CAVIN2	-0.407168	0.00193016	0.136894	0.863614
SLC52A2	0.481086	0.00207646	0.13792	0.860373
PIK3R6	-0.443441	0.00209335	0.137947	0.860288
GIMAP1	-0.424067	0.00208795	0.138135	0.859697
HBA1	-0.380661	0.00215137	0.139034	0.85688
SDC3	-0.465009	0.00212319	0.139365	0.855848
OSCAR	-0.43316	0.00215096	0.139546	0.855283
SLC23A3	0.441072	0.002135	0.139592	0.855139
PRKCH	-0.415023	0.00214985	0.140016	0.853822
CSTA	-0.487004	0.00224703	0.141928	0.847933
MPEG1	-0.463614	0.00222511	0.142152	0.847247
SESN3	-0.460511	0.00221042	0.1423	0.846796
CD36	-0.437091	0.0022446	0.142311	0.846762
MT-ND6	0.415255	0.00222284	0.142551	0.846028
CRYM	-0.434561	0.00224371	0.142795	0.845286
SCG2	0.440886	0.00227569	0.143197	0.844065
SPIC	-0.479486	0.00229035	0.14358	0.842905
PLEKHG5	-0.337873	0.00230234	0.143793	0.842261
PXDC1	-0.449475	0.00239658	0.145341	0.837613
PPBP	-0.41929	0.00237191	0.145425	0.837361
HDC	-0.404139	0.00239114	0.145538	0.837024
JAML	-0.45927	0.00237117	0.145914	0.835902
AC037459.1	-0.441817	0.00238916	0.145948	0.835802
RAB27B	-0.462699	0.00234669	0.146018	0.835593
VNN3	-0.440175	0.00236465	0.14605	0.835499
CLEC1B	-0.424178	0.00249745	0.146162	0.835165
APOBEC3B	0.422447	0.0023638	0.146538	0.83405
GIMAP6	-0.497239	0.00249515	0.14654	0.834044
ITGA5	-0.431008	0.00251284	0.14655	0.834013
VAT1	-0.411952	0.00249061	0.146788	0.83331
MS4A7	-0.489685	0.00246755	0.146982	0.832736
TUBA4B	0.4464	0.0025392	0.147063	0.832497
YPEL4	-0.418284	0.00245135	0.147063	0.832496
C16orf54	-0.412608	0.00246254	0.147207	0.832071
PLEKHA1	-0.452488	0.00248925	0.147226	0.832015
MEGF6	-0.400222	0.0024459	0.147264	0.831902
VEGFC	-0.449932	0.00255275	0.147338	0.831686
PTGER2	-0.421303	0.00253836	0.147525	0.831136
F2	0.457229	0.00248677	0.147601	0.83091
GUCY1A1	-0.435381	0.00244481	0.14773	0.830531
HS3ST2	-0.44624	0.0025704	0.147846	0.83019
STC1	0.431347	0.00259639	0.14883	0.827309
KCNJ2	-0.446192	0.00270555	0.149952	0.824049
TRIM42	0.44109	0.00264787	0.150238	0.823221
PROSER2	-0.412219	0.00263	0.150242	0.823208
MEIS1	-0.443687	0.00267757	0.150393	0.822772
SLC12A7	-0.436687	0.00270538	0.150441	0.822635
MFSD2B	-0.397751	0.00264284	0.150462	0.822573
FAM166A	0.432444	0.00267554	0.150785	0.821641
RIPOR2	-0.419313	0.0027039	0.15086	0.821426
PLG	0.440124	0.00269696	0.150976	0.821092
ITGB2	-0.410861	0.00267426	0.151222	0.820384
PDPN	0.455592	0.00275271	0.152062	0.817978
RNF217	-0.439639	0.0027903	0.152131	0.817783
ZNF728	0.376469	0.00277945	0.152533	0.816637
HLA-DMA	-0.441531	0.00278894	0.152553	0.816579
DMKN	-0.436118	0.00277108	0.152573	0.816521
SLC7A8	-0.457109	0.00282097	0.153303	0.814448
PELI2	-0.586447	3.67e-05	0.153518	0.813841
EPN3	0.422612	0.00283798	0.153729	0.813245
RIMKLB	-0.442567	0.00293619	0.155035	0.809571
PSG4	0.426723	0.00287343	0.155146	0.809258
DUSP5	0.372052	0.00293	0.155197	0.809116
2023-03-01	-0.459351	0.00291164	0.155207	0.809089
RNASE3	-0.434432	0.00288926	0.1555	0.80827
C19orf38	-0.41973	0.00292712	0.155537	0.808167
SDK2	-0.426871	0.00291145	0.155693	0.807732
COTL1	-0.446276	0.00296386	0.156003	0.806866
CCDC74B	0.410514	0.0029098	0.156103	0.806588
CR1	-0.426388	0.00300162	0.157003	0.804091
ALAS2	-0.417017	0.0030526	0.157214	0.803509
GPR50	0.432133	0.00301642	0.157286	0.803309
KCNJ10	-0.417297	0.00299887	0.157351	0.803129
LPCAT2	-0.481306	0.00302897	0.15745	0.802857
FGR	-0.435099	0.00304992	0.15756	0.802553
PARP15	-0.457342	0.00304379	0.157731	0.802084
STAT5A	-0.392471	0.00310277	0.157855	0.801742
TYROBP	-0.452536	0.00308424	0.157872	0.801696
KLHDC8A	-0.414722	0.0030973	0.158057	0.801187
TFPI2	-0.41339	0.00308342	0.158314	0.800481
CCDC200	0.419592	0.00318614	0.161605	0.791545
OLR1	-0.405733	0.00324322	0.16253	0.789066
C1QA	-0.428053	0.00322506	0.162594	0.788896
P2RY1	-0.401468	0.00321746	0.162701	0.788611
SNCA	-0.409141	0.00323703	0.162707	0.788594
NAA10	0.38824	0.00326327	0.163047	0.787688
EPX	-0.391389	0.00338406	0.163706	0.785935
CEBPA	-0.427119	0.00337915	0.163943	0.785308
SLC1A2	0.427228	0.00341875	0.163963	0.785255
MXRA7	-0.431577	0.00340176	0.164089	0.784922
APAF1	-0.376313	0.00337317	0.164128	0.784817
LCP1	-0.440153	0.00329523	0.164153	0.78475
ARRB1	-0.428032	0.00341644	0.164323	0.784302
TMEM176B	-0.436195	0.00351817	0.164489	0.783863
HSPBP1	0.409751	0.00337199	0.164549	0.783704
MNX1	0.389911	0.00332622	0.164717	0.783262
SESTD1	-0.469187	0.00334636	0.164739	0.783203
BST1	-0.4625	0.00331697	0.164746	0.783185
PACSIN2	-0.373652	0.00336629	0.164752	0.78317
TGM2	-0.391594	0.00335674	0.164766	0.783133
SHE	-0.405566	0.00351737	0.164913	0.782746
MTPN	-0.395715	0.00334084	0.164953	0.78264
HBA2	-0.362777	0.00349866	0.164959	0.782623
RIN2	-0.440287	0.00344972	0.164976	0.78258
POU3F1	0.386223	0.00350998	0.165028	0.782442
TIMD4	-0.439772	0.00361856	0.165034	0.782427
SPTBN5	0.395639	0.00355095	0.165099	0.782254
CHAC1	0.447946	0.00354192	0.165138	0.782152
FBXL14	0.405483	0.00356217	0.165162	0.782089
HIST1H4H	0.381623	0.00366198	0.165214	0.781954
PROK2	-0.397626	0.0034767	0.165321	0.781672
FPR3	-0.43146	0.00361619	0.165376	0.781527
OR51I1	0.415072	0.00349801	0.165395	0.781478
CSF1R	-0.415146	0.00357972	0.165517	0.781156
OR10A4	0.367854	0.00347127	0.165533	0.781116
TSR3	0.405884	0.00361001	0.165546	0.78108
SLC7A7	-0.388142	0.00349202	0.165579	0.780995
HIST1H1T	0.444071	0.00366106	0.165618	0.780892
PRAM1	-0.391808	0.0036053	0.165784	0.780457
CD163	-0.411178	0.00359596	0.16581	0.780388
TRPC6	-0.408571	0.00365078	0.166051	0.779759
GPM6A	-0.431541	0.00366103	0.166066	0.77972
HCK	-0.433763	0.00372889	0.16778	0.77526
PPP1R27	0.423642	0.00378553	0.169872	0.769878
PTPRC	-0.399589	0.0039904	0.172142	0.764112
TUBA3C	0.312797	0.00398055	0.172161	0.764064
ADGRG3	-0.408673	0.0039783	0.17251	0.763186
ARGFX	0.415762	0.00397388	0.172766	0.762542
AC104532.1	0.444335	0.00393729	0.172972	0.762024
EME1	0.385889	0.00405231	0.173029	0.76188
CNTD2	0.419585	0.00386675	0.173052	0.761822
MT-ND5	0.393092	0.00397178	0.173124	0.761643
ZNF135	-0.415489	0.00388072	0.173214	0.761416
PHLDA2	0.400215	0.00404777	0.173278	0.761258
TNFRSF10C	-0.446532	0.00393585	0.173364	0.761042
HBB	-0.369762	0.00395657	0.173364	0.761041
ADAMTS8	0.432397	0.0038978	0.173514	0.760665
ESM1	-0.406105	0.00404421	0.173569	0.760527
HLA-DPA1	-0.399909	0.0039717	0.173573	0.760519
PSG11	0.402901	0.00403394	0.173574	0.760516
TBC1D2	-0.429682	0.00407631	0.173612	0.760421
PRSS57	-0.37749	0.00393245	0.173671	0.760273
HRG	0.431859	0.003927	0.173889	0.759727
SPDYE16	0.464097	0.00391721	0.173916	0.759661
CST7	-0.433203	0.00414728	0.17574	0.75513
CPPED1	-0.417554	0.00413694	0.175746	0.755114
TMEM26	-0.393931	0.0041937	0.177258	0.751394
FAM189A2	-0.406568	0.00420811	0.177419	0.751
SLC35A2	0.420038	0.00421923	0.177441	0.750946
AC020922.1	0.388053	0.00426613	0.178071	0.749406
APOE	-0.400845	0.00426576	0.178501	0.74836
BEND5	-0.430657	0.00425618	0.178546	0.74825
CLEC12B	-0.378134	0.00431067	0.179483	0.745977
PRRT2	0.434927	0.00432763	0.179742	0.745351
GOT1	0.344554	0.00434566	0.180044	0.744622
RGS18	-0.423961	0.00437285	0.180278	0.744058
IRGC	0.408671	0.0043649	0.180394	0.743777
LILRA1	-0.421968	0.00445882	0.182029	0.73986
CLRN1	0.421465	0.00444834	0.182045	0.739821
PDK4	-0.443573	0.0044457	0.182383	0.739016
PLAC1	0.378947	0.00449004	0.182413	0.738944
DEFA1	-0.392313	0.00448033	0.182462	0.738829
NPC2	-0.447126	0.0045458	0.182464	0.738822
AL135905.2	0.389246	0.00444426	0.182771	0.738092
CLEC11A	-0.416968	0.00456472	0.182785	0.738058
PLET1	0.438077	0.00454368	0.182818	0.737982
BAIAP2	-0.376565	0.00453796	0.183027	0.737484
TNFRSF11A	-0.416802	0.0046787	0.183401	0.736599
CEACAM20	0.422439	0.00453671	0.183419	0.736556
NCKAP5L	-0.360741	0.00464834	0.1835	0.736365
CDKN2A	0.291374	0.00459359	0.183502	0.736358
TCTEX1D4	0.413281	0.00467128	0.183539	0.73627
ABO	-0.377186	0.00462789	0.183558	0.736226
CTBP2	-0.38801	0.00452951	0.183571	0.736195
FYB1	-0.390926	0.00461892	0.183638	0.736038
AHSP	-0.405035	0.00461057	0.183742	0.735791
DEFA3	-0.385045	0.0046436	0.183746	0.735782
ALOX15	-0.397106	0.0046703	0.183933	0.73534
BTBD18	0.450638	0.00471241	0.184291	0.734497
CXCR2	-0.40101	0.00477723	0.184668	0.733608
ITIH3	0.420624	0.00475881	0.18481	0.733275
TTC24	-0.374349	0.00479275	0.184841	0.733201
PTK2	-0.362151	0.00477236	0.184907	0.733047
CEACAM8	-0.390793	0.00481091	0.185115	0.732559
IGF2BP2	-0.395141	0.0047566	0.185153	0.732468
NFE2	-0.395564	0.00482724	0.185318	0.732084
C1QB	-0.412475	0.00475457	0.185506	0.731642
GDPD2	0.349381	0.00489208	0.187377	0.727285
CPM	-0.402546	0.00490574	0.187471	0.727066
CUEDC1	-0.418968	0.00500297	0.188179	0.725428
MPP7	-0.440181	0.0050266	0.188222	0.72533
NFASC	0.380038	0.00499361	0.18825	0.725265
CDH19	0.363427	0.00498418	0.188319	0.725106
NACC2	-0.398275	0.00496324	0.188378	0.72497
LILRA2	-0.420222	0.00494563	0.188565	0.724539
CD93	-0.407348	0.00502483	0.188578	0.72451
PTPRT	0.418835	0.00496091	0.188717	0.724188
ALDH3B1	-0.418971	0.0049836	0.188723	0.724176
THPO	0.40218	0.00508166	0.189015	0.723503
EPB42	-0.352197	0.00505908	0.189015	0.723503
PIK3R5	-0.400661	0.00507666	0.18925	0.722965
IRS2	-0.378637	0.00513608	0.189774	0.721763
MAP3K12	0.385201	0.00513587	0.190186	0.720821
RFX4	0.39279	0.00512544	0.190221	0.720742
CELF3	0.36573	0.00523394	0.190862	0.71928
TMEM91	-0.372089	0.00520251	0.190964	0.719048
TLR8	-0.439123	0.00521671	0.191066	0.718816
C20orf144	0.387869	0.00525154	0.191088	0.718767
DOK2	-0.377174	0.00522925	0.191108	0.718722
ZNF580	0.393207	0.00520018	0.191298	0.71829
RCOR1	-0.377896	0.00526953	0.191326	0.718225
IL32	-0.407373	0.00519737	0.191616	0.717568
CSF2RA	-0.40879	0.00529394	0.191796	0.717159
SLAMF8	-0.395949	0.00533722	0.192531	0.715499
SASH1	-0.419606	0.00535081	0.192606	0.71533
EBI3	-0.398105	0.00532929	0.19266	0.715208
PATJ	-0.344781	0.00537977	0.193233	0.713919
DOCK5	-0.411158	0.00544837	0.194032	0.712127
ZNF831	-0.387998	0.00541442	0.194061	0.712061
NTN3	0.406305	0.00544585	0.194355	0.711403
MYOM1	-0.3925	0.00544259	0.194654	0.710737
CXCR1	-0.37674	0.00552405	0.195067	0.709817
CCDC175	-0.371315	0.00551606	0.195196	0.709529
SOX2	0.404535	0.00549336	0.195218	0.709479
CLIC6	-0.404928	0.00551239	0.19548	0.708899
LST1	-0.431979	0.00559085	0.19701	0.705512
SLC38A4	0.404229	0.00561495	0.197029	0.705469
SULF1	0.398529	0.00561357	0.197395	0.704664
CTU1	0.372337	0.00566923	0.197691	0.704013
CEND1	0.386094	0.00568313	0.197764	0.703854
GNA15	-0.420549	0.00566564	0.197978	0.703383
MBOAT2	-0.406325	0.00566449	0.198352	0.702563
PHLPP1	-0.363337	0.00573188	0.199046	0.701047
ZNF814	0.382862	0.00577057	0.199562	0.699923
KLHL31	0.386099	0.00578368	0.199602	0.699834
C10orf95	0.401424	0.0057625	0.199695	0.699632
DDAH2	-0.390171	0.0058264	0.200663	0.697533
BCL7A	-0.610703	2.41e-05	0.201497	0.695731
MAP3K11	0.396032	0.00586337	0.201522	0.695678
CLIP2	-0.361043	0.00588947	0.202004	0.69464
CD300LF	-0.422377	0.00592131	0.202267	0.694075
ZNF263	0.395673	0.00591548	0.202481	0.693615
CNIH2	0.401571	0.00594026	0.202501	0.693572
GCNT2	-0.420386	0.00595394	0.202555	0.693457
TEX11	0.307857	0.00599645	0.203587	0.691249
GIPC3	-0.380066	0.00602442	0.204123	0.690108
PPM1F	-0.319458	0.00603673	0.204127	0.6901
SERPINB1	-0.362954	0.00607998	0.205175	0.687876
FES	-0.367452	0.00614644	0.206585	0.684902
NLRP3	-0.379659	0.00614618	0.206991	0.684048
HAPLN3	-0.394364	0.00617138	0.207007	0.684015
MAP3K7CL	-0.372224	0.00620889	0.207849	0.682253
TENT4A	0.39202	0.00624262	0.208561	0.680768
ZNF92	0.402626	0.00629358	0.208598	0.68069
GATA2	-0.342157	0.00628374	0.208685	0.680509
FLT3	-0.390579	0.00628111	0.209012	0.679828
DZIP1L	-0.365068	0.00627487	0.209221	0.679395
GRAP2	-0.369024	0.00635179	0.209697	0.678408
DYSF	-0.378	0.00635091	0.210082	0.677611
AHR	-0.380259	0.00637917	0.210186	0.677396
CMTM8	-0.395519	0.00640319	0.210563	0.676618
AMH	0.387439	0.00645035	0.211698	0.674283
RNF212	-0.386246	0.00650871	0.212779	0.672072
TSSK3	0.421858	0.00649972	0.212901	0.671823
CPXM1	-0.364724	0.00656881	0.213908	0.669773
TAFA5	-0.367875	0.00655797	0.213971	0.669644
PLA2G2A	0.401165	0.00661718	0.215065	0.667431
SORL1	-0.364726	0.00671747	0.216642	0.664258
VCL	-0.356177	0.00669336	0.216699	0.664143
PRG2	-0.368443	0.00671155	0.216869	0.663803
MYB	-0.375095	0.00674085	0.216978	0.663585
MFHAS1	-0.38271	0.00676797	0.217016	0.663508
IGF2BP3	-0.420769	0.00669321	0.217114	0.663312
USP44	-0.393391	0.00676781	0.217427	0.662686
MLXIPL	0.394577	0.00682625	0.218049	0.661445
PADI4	-0.38915	0.00681499	0.218106	0.661333
TGFBI	-0.419276	0.00703132	0.218755	0.660042
MYL4	-0.397431	0.00704735	0.218847	0.659859
SLC35F1	0.36281	0.0069722	0.218951	0.659654
LTB	-0.406183	0.00693481	0.219009	0.659538
GPAT3	-0.407907	0.00696358	0.219091	0.659376
NPL	-0.378558	0.00703104	0.219154	0.659251
SLC16A10	-0.399764	0.00699183	0.219156	0.659247
CR1L	-0.374412	0.00695501	0.219233	0.659093
PTAFR	-0.414226	0.00691607	0.219245	0.659071
NEUROD2	0.401024	0.00693012	0.219275	0.659011
FPR2	-0.404135	0.00690829	0.219414	0.658736
BTBD11	-0.376225	0.00702751	0.219452	0.65866
LRRD1	0.400608	0.00689946	0.21955	0.658467
PEAK1	0.380483	0.00716815	0.219745	0.658082
STX3	-0.349794	0.00689412	0.219798	0.657977
TBC1D9	-0.355668	0.00702563	0.219804	0.657965
FABP4	-0.417712	0.00716507	0.220053	0.657473
AL357673.1	0.397055	0.00719534	0.220175	0.657232
HSD17B14	-0.421959	0.00714537	0.220256	0.657072
HSD17B2	0.419055	0.00713665	0.220394	0.656801
FBXO40	0.378307	0.00716307	0.220396	0.656796
SLC4A5	-0.363619	0.00713213	0.220661	0.656275
TSPAN15	-0.402821	0.00712314	0.220791	0.656019
CNTNAP4	0.316858	0.00726383	0.221461	0.654703
LRP2	0.364989	0.00726098	0.221778	0.654082
STON2	-0.363048	0.00733508	0.223227	0.651254
TRIM6	-0.39275	0.00738176	0.224239	0.649288
CA4	-0.366137	0.00744921	0.225063	0.647696
CD81	-0.39614	0.00742396	0.225113	0.6476
KLHL14	-0.349666	0.0074434	0.225294	0.64725
PTHLH	0.363375	0.00752679	0.226997	0.643979
ARHGAP24	-0.416431	0.0075424	0.227059	0.643861
BATF	-0.444983	0.00761116	0.228308	0.641479
PHACTR3	-0.360157	0.00760394	0.2285	0.641113
VSIG4	-0.405185	0.0076804	0.229153	0.639875
ABCA12	0.365321	0.00767641	0.229442	0.639326
GLIPR1L1	0.375107	0.00767609	0.229843	0.638568
AL583836.1	0.336959	0.00774377	0.230632	0.63708
CCDC86	0.359538	0.00777636	0.231191	0.636029
APBB1	-0.422413	0.00782847	0.232328	0.633898
HNMT	-0.419541	0.00784681	0.23246	0.633652
SERPINB6	-0.35926	0.00786758	0.232663	0.633272
TAS2R3	0.393887	0.0078968	0.233116	0.632429
EFHD2	-0.361825	0.00793702	0.233891	0.630987
HK3	-0.364063	0.00796836	0.23399	0.630802
P2RY11	0.435116	0.00796801	0.234391	0.630059
FGB	0.395685	0.00800795	0.234741	0.629411
HP	-0.361942	0.0080464	0.235456	0.628091
ABLIM3	-0.373807	0.00808596	0.2362	0.626719
TGS1	-0.311553	0.00816675	0.236906	0.625423
WDR38	0.383669	0.00815905	0.237094	0.625079
FAP	0.374764	0.00813373	0.237182	0.624918
PSTPIP1	-0.366987	0.0082137	0.237445	0.624436
LAMP1	-0.364624	0.00815823	0.237483	0.624368
ARID3C	0.392531	0.0082029	0.237543	0.624257
RB1	-0.370464	0.00830968	0.237756	0.623868
TMEM40	-0.376921	0.00828728	0.237929	0.623553
CA1	-0.329394	0.00824521	0.237945	0.623523
ACOT11	-0.373151	0.00826357	0.238065	0.623305
PHLDB2	-0.387177	0.00830828	0.238123	0.623198
ACTL10	0.407366	0.00828407	0.238245	0.622976
PTK7	-0.366738	0.00838115	0.238578	0.62237
MT-ND2	0.372206	0.00837031	0.238675	0.622193
AMOTL1	-0.408582	0.00836383	0.238897	0.621789
TEX55	0.401891	0.00840804	0.238937	0.621717
TMEFF2	-0.394184	0.00842575	0.239034	0.62154
LBH	-0.403853	0.00849114	0.240482	0.618918
ARHGEF9	0.295829	0.00852213	0.240952	0.61807
REXO1	0.365543	0.00869984	0.245561	0.60984
CNRIP1	-0.392529	0.00875917	0.24682	0.60762
FAM241A	0.374013	0.00879553	0.247013	0.607281
OR51B6	0.362684	0.008784	0.247104	0.607121
PLEKHA4	-0.42186	0.00882076	0.247306	0.606765
CNST	-0.374787	0.00885663	0.247897	0.605729
PSTPIP2	-0.394433	0.00889531	0.24815	0.605287
FCN1	-0.384643	0.00889355	0.248515	0.604648
LAIR1	-0.394161	0.0089806	0.250112	0.601866
MC1R	0.385267	0.00901243	0.250582	0.601051
CLEC18B	0.377117	0.00903748	0.250861	0.600566
ASTL	0.396844	0.00907316	0.251019	0.600293
LCN6	-0.357929	0.00909547	0.251221	0.599944
GNGT2	-0.398665	0.00906777	0.251285	0.599833
C4orf19	0.376139	0.00911616	0.251378	0.599673
LARGE2	-0.369024	0.00914472	0.25175	0.59903
BAX	0.307311	0.00916385	0.251863	0.598836
PCSK6	-0.367259	0.00927383	0.251989	0.598618
TM6SF1	-0.407769	0.00931275	0.252228	0.598207
ACSM5	-0.396507	0.00919327	0.252257	0.598156
CD27	-0.373643	0.00926867	0.252258	0.598154
SNX20	-0.338121	0.00930045	0.252303	0.598078
ASPN	0.406099	0.00924294	0.252379	0.597947
CD5L	-0.370509	0.00926071	0.252452	0.59782
FEZ1	-0.411122	0.00923842	0.252668	0.59745
CD1A	-0.343172	0.00922598	0.25274	0.597325
TK1	0.407917	0.0093852	0.252962	0.596945
SFRP4	0.365628	0.00946563	0.253092	0.596721
BCAP29	-0.355665	0.00936577	0.253254	0.596443
LNX1	-0.377977	0.00938303	0.253312	0.596345
ZNF366	-0.358027	0.00946544	0.253492	0.596036
MMP9	-0.334432	0.00950572	0.253759	0.595579
AP001273.2	0.351581	0.009464	0.25386	0.595406
TMPRSS9	0.400585	0.00944893	0.253862	0.595402
IL2RA	-0.352812	0.00954003	0.253865	0.595397
A1CF	0.370437	0.00952494	0.253867	0.595394
CD96	-0.405566	0.00943595	0.253921	0.595301
SHANK1	-0.345036	0.00963314	0.254723	0.593932
COL22A1	-0.37874	0.00961931	0.254759	0.59387
KLHL25	0.400794	0.00960723	0.254843	0.593728
ARRB2	-0.343637	0.00960531	0.255196	0.593126
PLBD1	-0.371899	0.00967806	0.255507	0.592597
PSG5	0.372846	0.0097115	0.255986	0.591784
CMKLR1	-0.39599	0.00976865	0.256684	0.590601
TNS1	-0.357193	0.00979472	0.256966	0.590125
AKAP7	-0.414843	0.00976449	0.256978	0.590104
CYP2C9	0.346274	0.00981217	0.257021	0.590032
KRT86	0.358837	0.00982937	0.257069	0.589951
CLC	-0.376946	0.00988657	0.257358	0.589462
UBAC2	-0.38091	0.00993791	0.257493	0.589234
GABRG1	0.307508	0.00987806	0.257537	0.58916
BFSP2	0.356475	0.00992628	0.257591	0.58907
GNG11	-0.362922	0.00996504	0.257797	0.588722
FPR1	-0.404706	0.00992111	0.257857	0.588622
SPRED3	0.362922	0.00987541	0.25787	0.588599
PARVG	-0.353084	0.0100109	0.258583	0.5874
PCM1	-0.333345	0.0101672	0.259024	0.58666
OBSL1	-0.352212	0.0100435	0.259025	0.586658
QRICH2	0.42885	0.0100784	0.259128	0.586486
P2RY12	-0.38863	0.0101612	0.259265	0.586256
RTN1	-0.379798	0.0101511	0.259405	0.586022
C1QTNF9B	0.366784	0.0100759	0.259463	0.585924
HBM	-0.363536	0.010143	0.259593	0.585708
HHEX	-0.389258	0.0101141	0.259647	0.585617
FIBCD1	0.397115	0.0102113	0.259753	0.585439
OPHN1	-0.369956	0.0101422	0.259969	0.585078
GRM5	0.344744	0.0102388	0.260056	0.584934
CDK2AP1	-0.421092	0.0102675	0.260391	0.584374
POLQ	0.357967	0.0103728	0.26069	0.583875
ZBTB8A	-0.359766	0.0102981	0.260772	0.583739
RPL22L1	0.400312	0.010335	0.260915	0.5835
MYOM3	0.341027	0.0103666	0.260928	0.58348
TLR5	-0.38976	0.0103202	0.260935	0.583467
FSCN1	-0.341281	0.0103567	0.261071	0.583241
TNFSF13	-0.365647	0.0104212	0.261514	0.582505
APOC1	-0.412407	0.0104974	0.263032	0.579992
NID1	-0.382932	0.0105318	0.263107	0.579867
SYT7	0.34851	0.0105905	0.263394	0.579394
OMG	0.401785	0.0105294	0.263441	0.579317
TMEM253	0.380631	0.0106307	0.263611	0.579037
PLCB2	-0.344066	0.0106173	0.263668	0.578942
RNF130	-0.39702	0.0105895	0.263761	0.57879
GPC6	0.352316	0.0106694	0.263789	0.578744
ARL11	-0.375416	0.0105774	0.263851	0.578641
FCER1A	-0.356546	0.0106575	0.263885	0.578586
SH2D1A	-0.370805	0.01069	0.263908	0.578548
TMEM170B	-0.364144	0.0108617	0.266183	0.57482
AWAT1	0.378936	0.011013	0.266381	0.574497
RILP	-0.366796	0.0108098	0.266472	0.574348
FILIP1L	0.42601	0.0108579	0.26648	0.574335
ZNF37A	0.370896	0.0109587	0.266608	0.574126
TMEM125	-0.375832	0.0109776	0.266681	0.574008
TLCD3B	0.347318	0.0108528	0.266745	0.573904
CALHM6	-0.440089	0.0110128	0.266762	0.573876
CHRM3	0.325939	0.0108407	0.26684	0.573749
SCN8A	-0.347888	0.0109393	0.266912	0.573631
IL13	0.37025	0.0109558	0.266926	0.573609
TAS1R1	0.37103	0.0110114	0.267113	0.573305
INSRR	0.358888	0.0109349	0.267194	0.573173
SYDE2	-0.346417	0.0109311	0.267492	0.57269
CPNE2	-0.390241	0.0110796	0.267605	0.572506
CHI3L1	-0.358548	0.0111328	0.268504	0.57105
DNM3	-0.342653	0.011173	0.268699	0.570735
MDGA2	0.334297	0.0114565	0.268947	0.570334
RNASE1	-0.393344	0.0114278	0.269028	0.570202
SSTR2	0.322678	0.0111716	0.269051	0.570166
CXCL13	0.36407	0.0114498	0.269166	0.56998
ZBTB7A	0.352635	0.0113089	0.269258	0.569832
RFTN1	-0.353392	0.0112457	0.269284	0.569789
QPCTL	0.293583	0.0114269	0.269386	0.569625
IRAK3	-0.377888	0.011219	0.269417	0.569575
TMTC1	-0.365665	0.011236	0.269439	0.569539
CENPV	-0.348142	0.0113023	0.269483	0.569468
ITGAX	-0.356757	0.0112874	0.269512	0.569422
AC005154.5	-0.383504	0.0114982	0.269548	0.569364
FEZ2	-0.337382	0.0114227	0.269665	0.569175
CCND3	-0.355806	0.0113426	0.269676	0.569157
P2RY4	0.376791	0.0112796	0.269712	0.5691
SLC1A5	0.337723	0.0114127	0.26981	0.568943
DACT1	-0.360885	0.0113711	0.269971	0.568683
HIGD1B	0.366934	0.0114113	0.270158	0.568382
ITK	-0.385725	0.0114101	0.270514	0.567811
SCN3B	-0.35049	0.0115856	0.270837	0.567292
ZBTB7B	0.379382	0.0116251	0.271005	0.567023
TFR2	-0.344666	0.0116157	0.271162	0.566772
RGL1	-0.390559	0.0115855	0.271215	0.566686
ENHO	-0.33005	0.0117216	0.272874	0.564038
ACSL6	-0.351647	0.0118928	0.274568	0.56135
DCAF8L2	0.316405	0.0118593	0.274932	0.560775
RRM2	0.307	0.0118924	0.274937	0.560767
OR2AE1	0.366142	0.0118432	0.274939	0.560763
TOB2	0.336642	0.0119762	0.274976	0.560705
CYBB	-0.380059	0.0118283	0.274976	0.560705
PKN3	-0.343881	0.0119649	0.275095	0.560518
ERG	-0.343402	0.0118897	0.275256	0.560264
PCDHA2	0.335583	0.0119556	0.275258	0.560261
DEK	-0.333966	0.0119402	0.275283	0.56022
CYSRT1	0.36346	0.0120936	0.275405	0.560029
FCGR2A	-0.370489	0.012086	0.275606	0.559711
SYNGR1	-0.398886	0.0121246	0.275737	0.559505
PCDHA10	0.33549	0.0121467	0.275864	0.559305
SPATA17	0.337668	0.0120827	0.275908	0.559235
HHIP	-0.361327	0.0120754	0.276117	0.558907
CSAG2	0.287452	0.0120626	0.276203	0.558772
CABLES1	-0.382985	0.0120549	0.276404	0.558456
UBALD1	0.366043	0.0122283	0.27734	0.556988
SYK	-0.382544	0.0122661	0.277445	0.556823
SRP14	0.348633	0.0122523	0.277508	0.556724
KRT72	-0.346441	0.0123456	0.277742	0.556358
SAPCD2	0.339758	0.0123336	0.277846	0.556196
F10	0.358669	0.012419	0.2779	0.556112
TCAP	0.359981	0.0123047	0.277944	0.556043
NECTIN2	-0.38818	0.0123913	0.278024	0.555918
PDGFA	-0.341461	0.012408	0.278026	0.555915
PRKCQ	-0.372252	0.0123797	0.278135	0.555744
SHC2	-0.353683	0.0123326	0.278199	0.555645
HNRNPA0	0.352689	0.0124496	0.278214	0.555621
ZSWIM5	-0.32576	0.012655	0.280554	0.551983
LRRC15	0.355679	0.0126488	0.28079	0.551618
ITGB3	-0.357243	0.0125897	0.28097	0.551341
SLC8A1	-0.38006	0.0126421	0.281014	0.551271
COL7A1	0.360552	0.0126135	0.281126	0.551099
DHRS12	-0.366072	0.0126372	0.281279	0.550863
GPR183	-0.371677	0.0128801	0.281445	0.550606
ZNF835	-0.373372	0.0129486	0.281472	0.550565
TDO2	0.358971	0.0128522	0.281571	0.550412
CD9	-0.362328	0.0129398	0.281647	0.550294
AD000671.2	0.357391	0.0129904	0.281649	0.550292
SLC16A2	-0.3575	0.0127224	0.281676	0.55025
SMPDL3A	-0.40021	0.0128417	0.281709	0.550199
ZEB2	-0.341275	0.0129092	0.281714	0.550191
AP2B1	-0.334334	0.0130111	0.281733	0.550163
CAPN11	-0.340037	0.0129782	0.281751	0.550135
TLR4	-0.391949	0.012878	0.281766	0.550111
LYST	-0.335051	0.0127446	0.281795	0.550066
TMEM220	-0.357128	0.0127834	0.281909	0.549891
ZNF185	-0.378108	0.0129366	0.281944	0.549837
ZNF780B	0.309153	0.0128187	0.281944	0.549836
MTSS1	-0.352341	0.0128366	0.281968	0.5498
COL19A1	-0.338888	0.0127776	0.282152	0.549517
CACNA2D4	-0.383871	0.012815	0.282234	0.549391
TRERF1	-0.385891	0.0130536	0.282289	0.549306
CHRNA3	0.354911	0.0132228	0.284843	0.545395
PNRC1	-0.360461	0.0132657	0.285034	0.545103
VCAN	-0.352123	0.0132535	0.285137	0.544946
GCA	-0.369029	0.0132223	0.2852	0.544851
LY6G6F-LY6G6D	-0.321979	0.0133079	0.285208	0.544838
RNF39	0.367281	0.0132944	0.285285	0.544722
MAST2	0.369359	0.013222	0.285561	0.544301
ITPRIPL2	-0.36171	0.0134398	0.286567	0.542774
MYO7B	-0.339181	0.0134067	0.286591	0.542737
GDA	0.292642	0.0134315	0.286755	0.542488
DAPK2	-0.363974	0.013399	0.286794	0.542429
NRP1	-0.368992	0.0137124	0.287256	0.541731
CACNA1G	0.350237	0.0134912	0.287298	0.541667
AL807752.6	-0.321777	0.0137107	0.287581	0.54124
IGSF23	0.351528	0.0137483	0.287648	0.541138
F13A1	-0.332372	0.0136318	0.287729	0.541016
PRR22	0.341729	0.0137091	0.287908	0.540746
TNFRSF1B	-0.361182	0.0136247	0.287942	0.540694
FAM229A	0.372884	0.0136974	0.288024	0.540571
SALL2	-0.345958	0.0135454	0.288085	0.540479
VWCE	0.351167	0.0136148	0.288097	0.540462
MMD	-0.413686	0.0135806	0.288101	0.540455
TFF1	0.344679	0.0136848	0.288121	0.540425
AOAH	-0.341927	0.0135988	0.288122	0.540423
SIK1B	0.278221	0.0138749	0.288136	0.540403
SHANK3	-0.335487	0.0138964	0.288226	0.540266
AL160272.2	-0.368544	0.0136762	0.288303	0.540151
TCTE3	0.34489	0.0138708	0.288409	0.539991
RETN	-0.355498	0.0135796	0.288447	0.539935
CST6	-0.364883	0.0139296	0.288557	0.539769
ACP5	-0.402383	0.0138454	0.288598	0.539707
ADAP1	-0.349861	0.0138673	0.288695	0.539561
LRRC8A	0.336501	0.0138211	0.288811	0.539386
FTCDNL1	-0.34747	0.0138412	0.288871	0.539296
DCC	0.349785	0.0140024	0.289348	0.53858
FAM177B	-0.357981	0.0139881	0.28941	0.538486
ZNF492	-0.324005	0.0140476	0.289924	0.537716
TSPEAR	0.279974	0.0140923	0.290131	0.537406
MYBBP1A	0.358443	0.0140796	0.290227	0.537263
UNC5CL	0.348235	0.0141593	0.290795	0.536413
SUCNR1	-0.344927	0.0141501	0.290963	0.536162
LCN2	-0.360835	0.0142527	0.29164	0.535152
OR51M1	0.348718	0.0142191	0.291665	0.535116
IL23R	0.342318	0.0142402	0.29174	0.535004
SP7	0.359974	0.0143153	0.29185	0.53484
ASB15	0.364957	0.0143006	0.291906	0.534757
CD69	-0.369467	0.0142955	0.292159	0.534381
HEATR9	-0.337325	0.0143665	0.292538	0.533818
DSC2	-0.360928	0.0144313	0.292788	0.533446
OR56A1	0.323524	0.0144161	0.292835	0.533377
SLC19A3	0.320784	0.0144027	0.292918	0.533254
IL18	-0.385978	0.0145056	0.293229	0.532792
TNFRSF11B	0.351451	0.0144891	0.293251	0.532761
FGG	0.363008	0.0144736	0.293293	0.532699
ARL4C	-0.377183	0.0145956	0.294695	0.530628
CXCL1	-0.346033	0.0147036	0.294742	0.530558
BMP3	-0.310238	0.0146971	0.294963	0.530232
MPL	-0.337115	0.0146324	0.295081	0.530059
KRT73	-0.339294	0.014668	0.295087	0.530049
RILPL1	-0.305583	0.0146914	0.295204	0.529878
SYTL4	-0.343601	0.014745	0.295218	0.529858
C20orf204	0.350819	0.0146605	0.295292	0.529748
OLIG1	-0.324552	0.0147703	0.29537	0.529634
STAT5B	-0.356291	0.0148089	0.29579	0.529017
CENPE	0.308022	0.0148975	0.296851	0.527462
CDHR3	-0.325724	0.0148806	0.296868	0.527437
CPVL	-0.402721	0.0149642	0.297118	0.527071
PDLIM2	-0.32905	0.0149309	0.297162	0.527007
TMCC2	-0.323896	0.0149512	0.297213	0.526932
LIN7A	-0.351945	0.0150169	0.29746	0.526572
PADI2	-0.343909	0.0152188	0.297584	0.526391
CYP1B1	-0.353669	0.015012	0.297714	0.526201
FCER1G	-0.387153	0.015249	0.297827	0.526036
FAM174C	0.331479	0.0150716	0.297837	0.526022
ZNF432	0.342807	0.0152689	0.297869	0.525975
IL31	0.372264	0.0152183	0.297922	0.525898
TBC1D4	-0.330626	0.0151734	0.298089	0.525654
CYBRD1	-0.396699	0.0150674	0.298107	0.525627
PJA2	-0.350895	0.0153005	0.298137	0.525584
ZNF511-PRAP1	0.344167	0.015215	0.298208	0.525481
C5AR2	-0.366822	0.0153799	0.298294	0.525355
F5	-0.349753	0.0152075	0.29841	0.525187
PNMA8A	-0.321163	0.0153508	0.298423	0.525167
CTSH	-0.3533	0.0151733	0.298437	0.525147
LFNG	-0.345551	0.015122	0.29848	0.525084
GRM8	0.352728	0.0153428	0.298614	0.52489
LDLRAD4	-0.341566	0.0153786	0.298615	0.524888
ATP1B2	-0.351938	0.0151715	0.298753	0.524688
MATK	-0.357678	0.0151542	0.298765	0.524671
CORO2A	-0.350423	0.0154297	0.298914	0.524454
ATP8B4	-0.367313	0.0154878	0.299001	0.524327
MAGED4	-0.328475	0.0156362	0.299107	0.524174
SLC37A3	-0.394047	0.015478	0.299158	0.524099
PRUNE2	-0.340138	0.0156581	0.299185	0.524061
WDFY4	-0.323965	0.0156107	0.299304	0.523887
CSAG3	0.286759	0.0154698	0.299345	0.523828
TLK1	-0.341864	0.0156332	0.299391	0.523761
SLC5A11	0.334926	0.0156035	0.299509	0.523591
OR5B12	0.365734	0.0155745	0.29964	0.523401
WWC2	-0.384196	0.0155952	0.299693	0.523324
AJM1	0.371011	0.0155634	0.29977	0.523211
OPN3	-0.426152	0.015563	0.300109	0.522722
SLC13A4	0.331245	0.0158601	0.300302	0.522442
MPP1	-0.342483	0.0158244	0.300305	0.522438
ANKRD22	-0.336362	0.0158592	0.300625	0.521975
ARMC3	-0.342614	0.015824	0.300638	0.521956
ZNF688	-0.33448	0.0159155	0.300671	0.521909
LSM7	0.258075	0.0158978	0.300674	0.521904
FBN2	-0.344329	0.0157934	0.30074	0.521809
PPL	-0.322424	0.0158141	0.300791	0.521735
MAP3K5	-0.349454	0.0157783	0.300794	0.52173
PER3	-0.362543	0.0157743	0.30106	0.521346
AGT	0.345141	0.0160198	0.301958	0.520053
TSPY2	0.31115	0.0160062	0.302042	0.519933
MT-ND4L	0.336715	0.0160967	0.302386	0.519438
CD101	-0.386196	0.016089	0.302581	0.519158
RTL6	-0.338754	0.0160842	0.302832	0.518798
AFAP1L1	-0.341197	0.0161631	0.303293	0.518137
SLC13A5	0.360144	0.016182	0.303309	0.518114
GRIA2	0.312514	0.0162093	0.30348	0.51787
MOB1B	-0.361413	0.0162481	0.303867	0.517317
RRAS2	-0.411114	0.0163158	0.304452	0.516481
CD79A	-0.34815	0.016477	0.304743	0.516067
GAS2	0.297152	0.016315	0.304777	0.516017
TEX38	0.355983	0.0163561	0.304865	0.515892
PLCH1	-0.33649	0.0164731	0.305007	0.515691
HMCN2	0.34365	0.0165113	0.30504	0.515643
BCL11B	-0.347654	0.0164568	0.305043	0.515638
HPDL	0.33691	0.0164317	0.305253	0.51534
SHTN1	-0.354839	0.0164526	0.305303	0.515269
CADM4	-0.346485	0.0165664	0.305383	0.515155
PTGS1	-0.313697	0.016549	0.305399	0.515133
CACNA1C	-0.317671	0.0164062	0.305457	0.515049
CLEC5A	-0.334416	0.016426	0.305487	0.515008
ZNF704	-0.34012	0.0166098	0.305847	0.514495
IL1R1	-0.356759	0.0166749	0.306708	0.513275
SNTB1	-0.335674	0.01671	0.307016	0.51284
ZAP70	-0.330816	0.0167549	0.307504	0.51215
NKAPL	-0.347782	0.0167899	0.307809	0.511719
BHMT	0.357338	0.0169268	0.308628	0.510565
PFKP	-0.317696	0.0168819	0.308819	0.510296
GAB4	0.25079	0.0169255	0.30894	0.510125
CDC42EP4	-0.353564	0.0168717	0.308969	0.510085
PIGBOS1	0.341245	0.016914	0.309068	0.509947
RPS6KA2	-0.333813	0.0170182	0.309957	0.508698
MYLK2	0.341807	0.0171033	0.311169	0.507004
MT-ND1	0.326071	0.0171424	0.311541	0.506485
POLR3GL	-0.295651	0.0171626	0.31157	0.506444
WASF3	-0.340009	0.0172139	0.312162	0.50562
MMP17	-0.344841	0.0173176	0.313026	0.504419
FRMD3	-0.352585	0.0173014	0.313071	0.504358
TUBB2B	-0.355844	0.0172882	0.31317	0.504219
FAM227A	0.312251	0.0174151	0.313434	0.503854
DDIT4	0.336624	0.0173792	0.313461	0.503816
PBOV1	0.361589	0.0175356	0.31358	0.503651
CHRNE	-0.341258	0.0173722	0.313674	0.503521
MCTP1	-0.345787	0.0176363	0.313704	0.50348
CC2D2B	0.338566	0.0176934	0.313721	0.503457
EPB41L3	-0.340418	0.0174134	0.313742	0.503427
ENTPD3	-0.355087	0.0176794	0.313804	0.503341
LHPP	-0.304954	0.0176063	0.313839	0.503293
PEX5L	0.33059	0.0176639	0.313862	0.503261
NOD2	-0.32683	0.0175335	0.313878	0.503239
MXD3	0.333472	0.0176324	0.313968	0.503114
RTL8B	-0.337197	0.0176023	0.314102	0.50293
WNT6	0.337891	0.0175313	0.314175	0.502828
RNF180	-0.352483	0.0174807	0.314278	0.502686
NHLH1	0.344519	0.017598	0.314361	0.502572
CDH1	-0.375654	0.0175303	0.314494	0.502388
SMO	-0.33686	0.0175171	0.314593	0.502251
CLEC4D	-0.355752	0.0177716	0.314774	0.502001
SERINC2	-0.376598	0.0178957	0.316637	0.499439
TNNI3	-0.312042	0.0181234	0.31698	0.498968
GLI4	0.326391	0.0179564	0.31704	0.498886
DNAAF3	-0.314028	0.0179411	0.317105	0.498797
SIGLEC7	-0.37351	0.0181197	0.317246	0.498603
CHEK1	0.337934	0.0181027	0.317281	0.498556
KIF4B	0.353271	0.0180992	0.317552	0.498185
ADD3	-0.357659	0.0180901	0.317726	0.497947
DAB2	-0.337411	0.0180751	0.317795	0.497853
PRB4	0.336534	0.0180223	0.317869	0.497752
RNF126	0.263681	0.0182016	0.318015	0.497552
TRIP13	0.367357	0.0180496	0.318016	0.497552
SEMA6C	-0.354492	0.0182209	0.31802	0.497545
CA11	0.331934	0.0180745	0.318118	0.497412
RAB42	-0.357818	0.018314	0.319313	0.495784
VPREB3	-0.335592	0.0183676	0.319582	0.495418
MYADML2	0.351213	0.0183652	0.319872	0.495024
FXYD6	-0.357112	0.0184331	0.320056	0.494774
GP5	-0.3262	0.0184141	0.320057	0.494773
NIBAN3	-0.31662	0.0185993	0.322272	0.491778
SLC47A2	0.341499	0.0186275	0.322428	0.491568
PFKFB4	-0.340126	0.0188052	0.322501	0.491468
UBE2S	0.300423	0.0185943	0.322519	0.491445
CCL14	-0.359655	0.018653	0.322535	0.491424
BCL2A1	-0.378316	0.0187126	0.322565	0.491382
SUPT5H	0.349749	0.0186947	0.322589	0.491351
MT-CO2	0.327936	0.0186764	0.322606	0.491327
MBP	-0.325003	0.0187969	0.32269	0.491214
FGF11	0.335347	0.0187826	0.322775	0.4911
REEP1	0.311579	0.0187491	0.322862	0.490983
NHSL2	-0.343201	0.0187765	0.323002	0.490795
SCN1B	-0.344796	0.0188641	0.32318	0.490556
GRIN1	0.344146	0.0190414	0.323241	0.490474
TUBD1	-0.373391	0.0190646	0.323305	0.490387
SLCO2B1	-0.336535	0.0190279	0.323339	0.490341
FASTK	0.349448	0.01901	0.323363	0.49031
DSPP	0.309506	0.0190896	0.323403	0.490256
NUCB2	-0.339855	0.0189809	0.323525	0.490092
CDC14B	-0.281521	0.0190015	0.323547	0.490063
ERVK3-1	0.332201	0.0189277	0.323607	0.489982
CLSTN2	0.344956	0.0189508	0.323672	0.489895
TSPYL6	0.344277	0.0189723	0.32371	0.489844
KCNG1	-0.289041	0.0189146	0.323714	0.489839
TMEM132C	-0.320861	0.0191819	0.323983	0.489478
MT-ATP6	0.321142	0.0192087	0.324107	0.489311
CCDC36	0.340946	0.0191812	0.324298	0.489055
IGSF9B	-0.334947	0.0193066	0.324452	0.48885
SLC22A5	0.341606	0.0192691	0.324473	0.488821
TSPAN8	0.31463	0.0191775	0.324563	0.488701
DOCK1	-0.344273	0.0192571	0.324598	0.488654
RAB31	-0.333124	0.0193043	0.32474	0.488465
LRRIQ4	0.334319	0.0193443	0.32476	0.488438
GNLY	-0.362102	0.0193864	0.32514	0.487929
CA2	-0.317317	0.0194105	0.325219	0.487825
ZYX	-0.327508	0.0195194	0.325738	0.487132
GGN	0.335424	0.0195031	0.325791	0.487061
GNG2	-0.387835	0.0194901	0.325899	0.486917
NOTCH3	-0.320828	0.0194727	0.325934	0.48687
ZNF367	0.321081	0.0195904	0.326598	0.485986
CD72	-0.320907	0.0197004	0.327454	0.48485
ALDH2	-0.312597	0.0196823	0.327478	0.484818
ZNF587B	0.377837	0.0196631	0.327484	0.48481
KPNA2	0.245084	0.019722	0.327488	0.484805
ANKRD31	0.341538	0.0197535	0.327684	0.484544
NFATC1	-0.324224	0.0198016	0.328158	0.483917
CHRNA10	0.336537	0.0198746	0.329042	0.482749
RHOF	-0.295287	0.020038	0.329143	0.482615
MUC6	0.318388	0.0200317	0.329363	0.482326
SEPTIN5	-0.331296	0.0200299	0.329656	0.481939
TBXA2R	-0.342006	0.0199451	0.329882	0.481642
NUDT18	-0.360957	0.020026	0.329916	0.481597
PSG9	0.326187	0.0199715	0.329993	0.481495
SMARCA1	-0.36764	0.0200124	0.330017	0.481464
CDHR5	0.316153	0.0201172	0.330119	0.481329
SLC30A8	0.288947	0.0200024	0.330178	0.481252
SPAG5	0.281903	0.0201587	0.330477	0.480859
FN3K	-0.290018	0.0204713	0.331062	0.480091
KCNAB1	-0.362327	0.0204342	0.331101	0.48004
NRP2	-0.347442	0.0204585	0.331175	0.479943
MASP2	0.342421	0.0204257	0.331284	0.4798
TUBB1	-0.306191	0.0202278	0.331285	0.479798
CCDC198	0.333962	0.020412	0.331384	0.479669
GASK1B	-0.361309	0.0204034	0.331565	0.479432
ABR	-0.31143	0.0203583	0.331799	0.479125
TIMM23B	0.390078	0.0204032	0.331884	0.479013
LRP1	-0.28546	0.020329	0.331967	0.478905
MS4A4A	-0.358821	0.0203897	0.331987	0.478879
CETP	-0.345966	0.0203503	0.331991	0.478874
KCNJ15	-0.324029	0.0203152	0.332067	0.478774
CD19	-0.305711	0.0203121	0.33234	0.478418
SRP68	0.340985	0.0205834	0.332553	0.478139
TCN1	-0.337598	0.021439	0.334745	0.475286
FAM72A	0.308699	0.0215059	0.334851	0.475148
SRRM5	0.288218	0.0207866	0.334866	0.475129
TMPRSS11A	0.305484	0.0214276	0.334879	0.475112
CYP2S1	-0.335969	0.0215898	0.334911	0.47507
PPP1R14D	0.308156	0.0214705	0.334924	0.475054
NXF2B	0.317842	0.021571	0.334931	0.475044
TREM1	-0.342328	0.0215324	0.334954	0.475015
WDR18	0.315479	0.0207768	0.335031	0.474915
OSMR	0.352291	0.0215585	0.335047	0.474894
PDE10A	0.325009	0.0216187	0.33505	0.47489
SOBP	-0.321296	0.0214236	0.335129	0.474788
GRIK2	0.317242	0.0215044	0.33514	0.474774
PTGR1	-0.345817	0.0216522	0.335258	0.474621
ARAP3	-0.330059	0.020952	0.335272	0.474602
TMEM132B	0.325139	0.0207728	0.335289	0.474581
DUOX2	0.344735	0.0209175	0.335361	0.474488
ZNF717	0.311641	0.021421	0.335402	0.474435
NFIA	-0.354476	0.0216827	0.33542	0.474411
OTOP3	0.360828	0.0209433	0.335453	0.474368
GSN	-0.296605	0.0217052	0.335458	0.474361
PNMA2	0.334206	0.0208641	0.33547	0.474347
CEACAM4	-0.320744	0.0209092	0.335549	0.474243
UBXN2A	-0.375565	0.0208494	0.335554	0.474237
CD83	-0.342231	0.0214116	0.335569	0.474219
SELENOP	-0.369973	0.0211801	0.335713	0.474032
ACPP	-0.347836	0.0212411	0.335726	0.474014
PLXND1	-0.305824	0.0209024	0.335763	0.473967
AC104389.6	-0.336254	0.0214076	0.335821	0.473893
DUS3L	0.334037	0.0219732	0.335878	0.473818
LY86	-0.375064	0.0211726	0.335913	0.473774
PF4	-0.325043	0.0212402	0.336028	0.473624
C1orf162	-0.344322	0.0212202	0.33603	0.473623
ETV4	0.298937	0.0219634	0.336036	0.473615
DEFA4	-0.311781	0.0213634	0.336072	0.473568
RPUSD3	0.356215	0.0214051	0.336096	0.473537
CARD11	-0.32325	0.0213291	0.336164	0.473449
SLC5A12	0.314655	0.0211717	0.336216	0.473382
ZNF586	0.303796	0.0213976	0.336293	0.473282
SART1	0.301221	0.0220218	0.336315	0.473253
SOS2	-0.336057	0.0219623	0.336326	0.473239
CCL4L2	-0.343268	0.0213595	0.336327	0.473238
MYO1F	-0.310904	0.0213218	0.336366	0.473187
SPOCD1	-0.321293	0.0211691	0.336494	0.473022
UNC93B1	-0.325488	0.0210913	0.336535	0.472969
CDYL2	-0.341644	0.0219564	0.336544	0.472958
FHL3	-0.350094	0.0213138	0.336557	0.472941
TMEM68	-0.4006	0.0220584	0.336567	0.472928
MFSD6L	-0.295269	0.0221053	0.336669	0.472797
C16orf71	0.327125	0.0211633	0.336722	0.472729
MT1F	-0.355642	0.0211277	0.336796	0.472633
MAGEB1	0.248671	0.0221344	0.336804	0.472622
PSD3	-0.349983	0.0219537	0.336812	0.472613
ZNF214	0.323891	0.0210905	0.336844	0.472572
C17orf99	-0.316309	0.0221572	0.336845	0.472569
RCBTB2	-0.287073	0.0211531	0.33688	0.472525
TUBA1A	-0.335949	0.0221022	0.336928	0.472463
DHRS3	-0.364585	0.0219461	0.337003	0.472366
HMGB1	-0.293245	0.0210866	0.337103	0.472237
ABI3	-0.344438	0.021835	0.337154	0.472172
STOX2	-0.354424	0.02188	0.337226	0.472079
TSBP1	0.325789	0.0218608	0.33724	0.472061
ILK	-0.303561	0.0222041	0.337253	0.472044
FBRS	0.300343	0.0219446	0.33729	0.471996
HPGDS	-0.326519	0.0222304	0.337346	0.471925
ATP6V1FNB	0.335305	0.0222961	0.337425	0.471822
FCGR3B	-0.344603	0.0219136	0.337434	0.471812
PRSS27	0.329516	0.0222841	0.337549	0.471663
CLU	-0.322426	0.0219441	0.337592	0.471608
CD37	-0.310029	0.0222825	0.33783	0.471302
P2RY13	-0.349018	0.0224531	0.337968	0.471125
AKR1C3	-0.345394	0.0225573	0.338016	0.471063
SLC36A3	0.333649	0.0224375	0.338037	0.471035
ZNF646	0.351586	0.0224058	0.338168	0.470867
R3HDM4	-0.294357	0.0225282	0.338186	0.470845
SNN	-0.298832	0.0225512	0.338227	0.470791
SCUBE1	-0.313494	0.0224366	0.338328	0.470662
LRP5	-0.302771	0.0223967	0.338335	0.470653
ANPEP	-0.318211	0.0225204	0.338372	0.470605
SORT1	-0.356995	0.0225111	0.338537	0.470394
OXTR	0.315744	0.0223942	0.338603	0.470309
IL17RA	-0.287595	0.0226245	0.33872	0.470159
MGAM	-0.317215	0.0226911	0.339414	0.469271
DPEP2	-0.329987	0.022744	0.339598	0.469035
SPTB	-0.303017	0.0227358	0.339778	0.468805
GATM	-0.326233	0.0227891	0.339967	0.468563
TNFRSF13B	-0.21885	0.0228553	0.340652	0.467689
TTC25	0.329139	0.0229888	0.342336	0.465547
CYP2F1	0.324701	0.0233174	0.342356	0.465522
MAMLD1	-0.339666	0.0232178	0.342396	0.465471
MSH5	0.3309	0.0230348	0.342413	0.46545
STK24	-0.304238	0.0230794	0.342467	0.465381
SELENON	-0.287788	0.0232041	0.342496	0.465345
IRS1	0.296571	0.0233135	0.342601	0.465212
ISYNA1	0.349051	0.0232729	0.342604	0.465207
ANXA4	-0.313396	0.0230318	0.342673	0.465121
GPBP1L1	-0.321785	0.0232982	0.342675	0.465117
ASB13	-0.330568	0.0230755	0.342714	0.465069
ENAM	0.350117	0.0231587	0.342732	0.465045
SPTLC2	-0.371504	0.0232024	0.342773	0.464993
NUFIP2	0.311159	0.0231214	0.342787	0.464976
ATP8A1	-0.307424	0.023271	0.342878	0.46486
THOP1	0.286673	0.0231506	0.342916	0.464813
SLC2A3	-0.302163	0.023194	0.342952	0.464767
ENTR1	0.311996	0.0234172	0.34322	0.464427
ALDH1A3	-0.326019	0.0234003	0.343273	0.464361
ATP7B	-0.343543	0.0234992	0.344121	0.463289
CTTNBP2NL	-0.358614	0.0236361	0.344917	0.462285
INAFM2	0.317482	0.0236155	0.344918	0.462285
TRPM8	0.293045	0.0236034	0.345042	0.462128
ATXN2L	0.339715	0.0235904	0.345153	0.461988
HAS2	0.326615	0.023676	0.345199	0.46193
CENPA	0.342512	0.0239069	0.345258	0.461856
S100A6	-0.328008	0.0237783	0.345487	0.461568
MYT1L	0.285228	0.0239042	0.345517	0.461531
FCAR	-0.337373	0.0237434	0.34558	0.461451
CSPG4	0.315666	0.023731	0.345701	0.4613
CASS4	-0.307205	0.0239593	0.345716	0.46128
KYNU	-0.372066	0.0239007	0.345765	0.461219
EMILIN2	-0.308998	0.0237769	0.345766	0.461217
OVCH2	0.353579	0.023824	0.345851	0.46111
MTTP	0.322005	0.0240361	0.345929	0.461013
ITGAM	-0.321192	0.0239958	0.345944	0.460994
PDZK1IP1	-0.314829	0.0238928	0.34595	0.460987
SCARB1	-0.330461	0.0238738	0.345974	0.460956
BEST3	-0.31035	0.0240341	0.346198	0.460675
TNFSF12-TNFSF13	-0.311291	0.0238718	0.346245	0.460616
ENG	-0.308085	0.0241389	0.346812	0.459906
DSC3	0.313484	0.0241246	0.346905	0.45979
HEMGN	-0.318379	0.0241705	0.34697	0.459708
SGPP1	-0.350656	0.0242662	0.347152	0.45948
DNAJA4	-0.318193	0.0242263	0.347175	0.459452
SLC22A17	-0.291509	0.0242125	0.347274	0.459327
CRABP2	0.31569	0.024259	0.347345	0.459238
RAB11FIP4	-0.341979	0.0243322	0.347799	0.458672
CPO	0.327365	0.0243703	0.348046	0.458363
SLC24A4	-0.340126	0.0244318	0.348627	0.457639
CHMP3	-0.320303	0.0246007	0.348659	0.457599
PTPN22	-0.32153	0.0245591	0.348661	0.457597
MSRB1	-0.278201	0.0245848	0.34873	0.457511
AC008763.3	-0.304481	0.0245538	0.34888	0.457323
IPCEF1	-0.343324	0.024515	0.348922	0.457271
NCS1	-0.284407	0.0246402	0.348924	0.457269
CHRM4	0.305195	0.0249326	0.348931	0.457261
PLTP	-0.340123	0.0248287	0.348936	0.457255
FLOT2	-0.286041	0.0244764	0.348965	0.457218
MIOX	0.308171	0.0247914	0.348998	0.457177
ASPA	-0.307467	0.024959	0.349009	0.457163
SPIB	-0.305163	0.024919	0.349033	0.457133
HSD17B11	-0.319624	0.024502	0.349034	0.457133
C10orf62	0.349727	0.0248803	0.349074	0.457082
REPIN1	0.333592	0.0245477	0.34909	0.457062
ZNF385D	-0.315745	0.0247354	0.349091	0.457061
ACTN1	-0.295064	0.0247153	0.3491	0.45705
ADCY5	0.326431	0.0248675	0.349188	0.456941
NXF3	-0.326896	0.0247018	0.349205	0.45692
WEE2	0.329942	0.0248276	0.349214	0.456908
CEP126	0.289296	0.0247895	0.349264	0.456846
GPR3	0.331233	0.0249153	0.349274	0.456834
RAB13	-0.286391	0.0247742	0.349343	0.456747
UXS1	-0.28777	0.0250483	0.349381	0.4567
TEDC2	0.332962	0.025034	0.349473	0.456586
MMP21	0.309111	0.0247017	0.349499	0.456554
BEND4	-0.294069	0.02503	0.34971	0.456292
ARMC6	0.29592	0.0252424	0.350338	0.455513
GK3P	0.356657	0.0252392	0.350584	0.455208
MT-CYB	0.311762	0.0252302	0.35075	0.455002
MUC16	0.310715	0.0252276	0.351006	0.454686
CXCL16	-0.359496	0.0252173	0.351154	0.454502
HDAC5	0.300714	0.0252086	0.351326	0.45429
GABRB2	0.289343	0.0253846	0.351728	0.453793
AL139260.3	0.315228	0.025371	0.351831	0.453666
WDR49	-0.331309	0.025418	0.3519	0.453581
OSER1	0.271658	0.0254481	0.352024	0.453427
MT-ND4	0.308181	0.0255863	0.353353	0.451791
ABHD2	-0.326454	0.0256145	0.353451	0.451671
SERPINB2	-0.312123	0.0255848	0.353624	0.451458
PLEKHG1	-0.296033	0.0256992	0.353745	0.45131
VASH2	0.342587	0.0257226	0.353776	0.451272
KLRC4-KLRK1	-0.315413	0.0256643	0.353846	0.451185
MAGEC3	0.295291	0.0256917	0.353932	0.451081
JUP	-0.344001	0.0258599	0.355372	0.449317
SLC43A3	-0.329374	0.026312	0.356607	0.44781
TCP11L2	-0.328734	0.0263361	0.356645	0.447764
ADGRG1	-0.332989	0.0263587	0.356662	0.447743
ST6GALNAC2	-0.335632	0.0262988	0.356718	0.447675
YBX3	-0.304369	0.0264907	0.356718	0.447675
AKAP3	-0.35013	0.0265767	0.356729	0.447662
TPD52L1	-0.323688	0.0265184	0.356805	0.44757
AL627230.1	0.337968	0.0264344	0.356821	0.447549
PTPN18	-0.309036	0.0265412	0.356824	0.447546
SAMD11	0.317266	0.0265644	0.356849	0.447515
CORO2B	-0.286369	0.0262723	0.356936	0.44741
C19orf33	-0.31319	0.0264651	0.356949	0.447394
AEBP1	-0.290896	0.026487	0.356956	0.447386
RGL3	-0.322372	0.0264259	0.356994	0.447338
AC026740.3	0.313888	0.0264046	0.356995	0.447338
LMO2	-0.348121	0.0262984	0.357001	0.447331
SETD6	0.245902	0.0266646	0.35705	0.447271
SLC25A38	0.393175	0.0266461	0.357088	0.447225
TBC1D8B	-0.332134	0.0262626	0.357094	0.447217
RIMS3	-0.332793	0.0266309	0.35717	0.447125
FGL2	-0.334329	0.0262543	0.357272	0.447002
BX276092.9	0.306676	0.0260287	0.357399	0.446847
FIG4	-0.326177	0.0262459	0.357448	0.446787
M1AP	-0.324028	0.0260598	0.357533	0.446684
FER1L5	0.312164	0.0260909	0.357665	0.446524
FEM1A	0.303272	0.026245	0.357727	0.446449
RBM48	-0.323411	0.0261512	0.357906	0.446232
TRIB3	0.334909	0.0262434	0.357997	0.446121
PDE12	0.278964	0.0261365	0.357998	0.44612
MICAL2	-0.326361	0.0262347	0.358171	0.44591
PRKAR2B	-0.313721	0.0262243	0.35832	0.445729
ABCB6	0.245254	0.0262115	0.358437	0.445587
TCL1A	-0.304709	0.0268217	0.358866	0.445068
HELLS	0.309908	0.0269103	0.359764	0.443983
GRIK5	-0.331515	0.0276352	0.361091	0.442383
SETD3	-0.323071	0.0276275	0.361272	0.442165
PGC	0.350161	0.0275418	0.361281	0.442155
SERPINI2	0.291521	0.0275685	0.361348	0.442074
PF4V1	-0.32051	0.0275283	0.361388	0.442027
SHROOM2	-0.301952	0.0276807	0.361404	0.442007
ZNF287	-0.307045	0.027616	0.361405	0.442005
SH2D4B	-0.308443	0.0276062	0.361559	0.44182
PCK1	0.315076	0.0274572	0.361588	0.441786
KLRC4	-0.281529	0.027524	0.361614	0.441755
IKZF5	-0.348901	0.0274815	0.361623	0.441744
CALB1	0.297402	0.0275068	0.361672	0.441685
TMEM131L	-0.324956	0.0277228	0.361672	0.441685
ADGRE2	-0.313928	0.0274481	0.361754	0.441587
ZNF618	-0.301757	0.0278065	0.361917	0.441392
SMPX	0.312719	0.0274397	0.361927	0.441379
TGIF1	-0.340851	0.0277646	0.361935	0.441369
SYT11	-0.316586	0.027836	0.362019	0.441268
ZBTB12	0.322788	0.0278591	0.362039	0.441245
ATP8A2	0.317278	0.0271041	0.362066	0.441212
SFTPD	0.320717	0.0271481	0.362075	0.441201
GPRC5A	0.320615	0.027798	0.362088	0.441186
FLVCR2	-0.337909	0.027434	0.362137	0.441127
RXFP2	-0.286821	0.0274137	0.362156	0.441105
PRR5	-0.339483	0.0272903	0.362241	0.441003
USP35	0.316891	0.0271402	0.362259	0.440981
PLD1	-0.331331	0.0272763	0.362342	0.440882
ADAP2	-0.318714	0.0274118	0.362416	0.440793
CLEC4E	-0.322584	0.0271983	0.362456	0.440745
MKRN2OS	0.32717	0.0272664	0.362498	0.440694
AGO4	-0.317682	0.027229	0.362577	0.4406
LIME1	0.327825	0.0274041	0.362601	0.440571
MADCAM1	0.325801	0.0273827	0.362604	0.440568
MRPL4	0.280123	0.0272575	0.362668	0.440491
ZNF438	-0.318822	0.02735	0.362746	0.440398
SCAF1	0.310481	0.0273826	0.36289	0.440225
DLST	-0.303524	0.0279574	0.363034	0.440052
GP1BB	-0.290625	0.0280011	0.363039	0.440047
FOXJ1	0.313953	0.0279835	0.363091	0.439984
USP33	-0.351467	0.0280486	0.363372	0.439648
FMO5	-0.346287	0.0280729	0.363407	0.439607
PLAAT2	-0.300261	0.0281117	0.363627	0.439344
PHC2	-0.311641	0.0281744	0.363876	0.439047
VWF	-0.314356	0.0281674	0.364066	0.43882
XPOT	0.32186	0.0282654	0.36477	0.437981
CHPF2	0.319994	0.0283016	0.364956	0.43776
ATP6V1B2	-0.356555	0.0284149	0.365852	0.436694
HECW2	0.315052	0.0283958	0.365888	0.436651
MUC5B	0.30956	0.0284784	0.366388	0.436059
MIS12	-0.298021	0.0285293	0.36648	0.435949
PRC1	0.274521	0.0285152	0.36658	0.435831
GALNT14	-0.34155	0.0286002	0.367109	0.435205
SERPINA5	0.286331	0.0286449	0.367401	0.43486
MAF	-0.3277	0.0288166	0.36932	0.432597
PARP11	-0.314626	0.029085	0.369366	0.432543
TTC33	-0.280512	0.0290441	0.369407	0.432494
RNF182	-0.265016	0.0292695	0.369467	0.432424
SLFN5	-0.313148	0.0290717	0.369478	0.432411
COL23A1	-0.294902	0.02904	0.369636	0.432226
RHBDD3	0.326677	0.0290196	0.369657	0.432201
COA4	0.2986	0.0293082	0.369676	0.432179
LRMDA	-0.340054	0.0292687	0.369736	0.432108
EBF3	-0.308754	0.0290045	0.369747	0.432095
CYP2C8	0.323328	0.0288872	0.369941	0.431867
SESN1	-0.295177	0.0289981	0.369946	0.431861
RUNDC3A	-0.301158	0.0292668	0.369991	0.431809
NT5C1B	0.313794	0.0289354	0.369993	0.431806
GOLGA8K	-0.304115	0.0289214	0.370097	0.431685
SLC35F2	0.342721	0.0292324	0.370115	0.431664
MAGEA6	0.277952	0.0289971	0.370216	0.431545
PIWIL4	-0.312255	0.0293764	0.370258	0.431495
APOBR	-0.29453	0.0292663	0.370264	0.431489
RIOX1	-0.336418	0.0289794	0.370273	0.431478
CD3D	-0.32765	0.0292309	0.370376	0.431357
PRR19	0.322214	0.0292307	0.370654	0.431032
KCNQ1	-0.321058	0.0292098	0.37067	0.431013
SCARF1	-0.319045	0.0295034	0.370741	0.430929
RAB4B-EGLN2	-0.344169	0.0294444	0.370836	0.430818
GPANK1	-0.311721	0.0295018	0.371	0.430626
SIGLEC14	-0.306089	0.0295474	0.371016	0.430607
ZNF667	-0.298911	0.0297854	0.37122	0.430369
NCLN	0.294841	0.0294994	0.371249	0.430335
ITGA2B	-0.285918	0.0297741	0.371355	0.43021
SULT1B1	-0.302425	0.0297224	0.371541	0.429993
AMFR	-0.300429	0.0301237	0.371562	0.429968
LRRC6	-0.347179	0.0297704	0.371586	0.429941
CD84	-0.306186	0.0301542	0.371665	0.429849
PTX3	-0.310345	0.0298447	0.371682	0.429828
TIFAB	-0.274713	0.0297127	0.371697	0.429811
CD40LG	-0.303336	0.0296264	0.371729	0.429774
ZNF474	0.323463	0.0301201	0.371792	0.4297
C17orf107	-0.299354	0.0297678	0.371831	0.429654
BX255925.3	0.300239	0.030192	0.371858	0.429623
DHX58	-0.261553	0.0298872	0.371935	0.429533
FRMD4B	-0.32438	0.0296654	0.37194	0.429527
SLC16A9	-0.323516	0.0296893	0.371961	0.429502
GRM2	0.308954	0.0297124	0.371972	0.42949
GGH	0.329397	0.0301159	0.372015	0.429439
SYNJ2BP	0.291265	0.0302357	0.372121	0.429315
ZNF17	0.305392	0.0301071	0.372181	0.429246
ASAP2	-0.311683	0.0303102	0.372217	0.429204
TGFB1I1	-0.293583	0.0302912	0.372257	0.429158
FBP1	-0.330261	0.0300946	0.372302	0.429105
FUCA1	-0.342902	0.0303441	0.37236	0.429037
ADAMTS20	0.25793	0.0302864	0.372472	0.428906
TGIF2LX	0.283506	0.0300864	0.372475	0.428903
LDLRAD3	-0.309735	0.0303772	0.372493	0.428882
NUMB	-0.3449	0.0300613	0.372716	0.428622
OR10A5	0.292258	0.0300851	0.372734	0.428601
WDR4	0.252465	0.0304652	0.372753	0.428578
PSMC2	0.297719	0.0300487	0.372835	0.428483
BCL2L11	0.340745	0.0304551	0.372902	0.428405
NXF2	0.270971	0.0299931	0.372975	0.42832
NCAN	0.322539	0.030044	0.373054	0.428229
COLEC12	-0.297473	0.0304459	0.373062	0.428219
RRAD	0.320605	0.0300427	0.373314	0.427925
LONP1	0.297711	0.0305763	0.373567	0.427632
OTOA	-0.327413	0.0305658	0.373711	0.427464
DUSP26	-0.28768	0.03069	0.373864	0.427286
KRT6B	0.286655	0.0306234	0.373869	0.427281
TGDS	-0.369085	0.0306521	0.373947	0.42719
FUT4	-0.283249	0.0306811	0.374028	0.427096
TSPAN18	-0.315784	0.0307351	0.374141	0.426965
PDXP	0.307654	0.0307742	0.374345	0.426728
NIP7	0.336671	0.0308017	0.374407	0.426656
ALKBH4	0.330681	0.0310111	0.376679	0.424028
ARG1	-0.288439	0.0310359	0.376707	0.423997
CD2	-0.322955	0.0310984	0.376918	0.423753
CACNA1A	0.279874	0.0311237	0.376953	0.423713
ARHGAP10	-0.342233	0.0310816	0.376989	0.423672
CCDC38	0.304545	0.031252	0.377142	0.423495
CES1	-0.331764	0.03125	0.37739	0.423209
MAGEA1	0.238592	0.0313039	0.377496	0.423087
NME1	0.298977	0.0312489	0.377649	0.422912
SNAPC2	0.349099	0.0312415	0.377832	0.422701
ADARB1	-0.335161	0.0312367	0.378047	0.422454
FOLR3	-0.319866	0.0313746	0.378076	0.422421
LETM1	0.293942	0.0313975	0.37808	0.422416
PGLYRP1	-0.298824	0.0315158	0.378959	0.421407
ODAPH	0.311277	0.0315009	0.379053	0.4213
CT55	0.294903	0.0315551	0.37916	0.421177
ZFP28	-0.30966	0.031791	0.380356	0.41981
H2AFY2	-0.308393	0.0317869	0.380579	0.419555
KLHL5	-0.254757	0.0317748	0.380707	0.41941
ANKRD37	0.275806	0.0317466	0.380913	0.419174
GAS2L1	-0.278071	0.0317706	0.380929	0.419156
CERS1	0.31066	0.0317448	0.381165	0.418886
LILRB2	-0.301788	0.0318834	0.381189	0.418859
ZNF385A	-0.322861	0.031992	0.381397	0.418622
LCN10	-0.280546	0.0319736	0.38145	0.418562
PGLS	-0.280036	0.0320245	0.381513	0.418491
SSH3	-0.293153	0.0319579	0.381534	0.418467
FTL	-0.29026	0.0319484	0.381693	0.418286
SCN4A	0.304488	0.0321084	0.381969	0.417972
DNAJB7	0.322862	0.0321025	0.382171	0.417743
RRBP1	0.297878	0.0322592	0.383218	0.416554
MRC1	-0.330407	0.0322447	0.383318	0.416441
HEXIM1	0.311394	0.0323025	0.383461	0.416279
PDE4C	0.309635	0.0324953	0.383572	0.416153
PRR36	0.299589	0.0323496	0.383747	0.415954
RNF152	-0.27171	0.032489	0.38377	0.415929
RYR1	-0.307324	0.0324752	0.383877	0.415808
POLD2	0.26477	0.03239	0.383955	0.41572
MTHFD2	0.307922	0.0324476	0.384094	0.415563
SPRYD7	0.290578	0.0324747	0.384143	0.415507
HIST2H3A	0.275109	0.0324466	0.384353	0.41527
CHST12	0.285624	0.0326879	0.385031	0.414504
CGGBP1	-0.323397	0.0326719	0.385115	0.41441
IL18BP	0.293006	0.0326647	0.3853	0.414201
NOTCH4	0.345766	0.0330138	0.385345	0.41415
GUCY1B1	-0.333138	0.032993	0.385372	0.41412
PCDHA6	0.287993	0.032906	0.385431	0.414054
NFAM1	-0.347668	0.0328971	0.385596	0.413867
SVOP	0.269696	0.0329894	0.385598	0.413865
DHRS7	-0.353651	0.0329733	0.38568	0.413773
ACTG2	0.301634	0.032893	0.385818	0.413617
PCTP	-0.301129	0.0329636	0.385836	0.413598
LPIN2	-0.323528	0.0328494	0.385848	0.413584
PPP1R15A	0.318627	0.0327828	0.385877	0.413551
NLRC4	-0.306714	0.0328073	0.385896	0.41353
CRLF1	0.31321	0.0330863	0.385922	0.413501
IGSF21	-0.302689	0.0328826	0.385967	0.41345
CMSS1	0.250461	0.0328462	0.386081	0.413321
NAAA	-0.311035	0.0331585	0.386226	0.413158
RND2	-0.299399	0.0331474	0.386365	0.413002
CEBPZ	-0.298953	0.0332079	0.386533	0.412814
MYBL2	0.232132	0.0332717	0.387006	0.412282
ARRDC5	-0.307368	0.0333587	0.387749	0.41145
HIPK4	0.303211	0.0333921	0.387867	0.411317
APBA2	-0.308634	0.0334352	0.388099	0.411057
ERCC5	-0.292786	0.0335083	0.388677	0.410411
SPR	0.331175	0.0336279	0.388719	0.410365
GAS7	-0.309992	0.0337058	0.388813	0.41026
SLC17A5	-0.296216	0.0336168	0.388858	0.410208
PRKAA2	-0.31352	0.0336967	0.388976	0.410077
LPA	0.278629	0.0335864	0.389045	0.41
SDK1	-0.299997	0.0337964	0.389053	0.409991
RIMS1	-0.260764	0.033614	0.389095	0.409945
BORCS6	-0.313402	0.0338507	0.389144	0.40989
PRKCG	-0.291223	0.0336892	0.389158	0.409874
GNB4	-0.326333	0.0335734	0.389163	0.409868
UGT1A6	0.300917	0.0339035	0.389216	0.409809
CCL28	-0.29371	0.0337875	0.389219	0.409806
KCTD12	-0.320525	0.0338843	0.389262	0.409758
ZNF792	-0.313747	0.0338489	0.38939	0.409615
EXOC3L4	-0.297144	0.0337831	0.389437	0.409563
MYO10	-0.311038	0.0341345	0.391331	0.407456
GARS	0.292195	0.0341136	0.39136	0.407424
C5AR1	-0.307664	0.0342093	0.391384	0.407397
CCL5	-0.294977	0.0343539	0.391433	0.407342
ZNF564	0.300684	0.0341993	0.391537	0.407227
GDAP2	-0.24378	0.0343415	0.391559	0.407203
CECR2	-0.283572	0.0341803	0.391588	0.40717
ZNF136	0.32834	0.0342558	0.391648	0.407104
S100P	-0.295513	0.0343272	0.391663	0.407088
VPREB1	-0.288514	0.0344031	0.391728	0.407016
DBH	0.309616	0.0344521	0.391752	0.406988
Z82206.1	-0.302285	0.0342891	0.391762	0.406978
AL445423.3	-0.311871	0.0344319	0.391789	0.406948
B3GNT7	-0.296625	0.0343155	0.391796	0.40694
SLC25A37	-0.248012	0.0345721	0.39285	0.405773
GPR27	-0.281097	0.0347615	0.393665	0.404873
KDM5B	-0.294538	0.0347465	0.393763	0.404765
APOBEC4	0.295092	0.0346827	0.39384	0.404681
WDR78	-0.347144	0.0347081	0.39386	0.404658
UPK3A	-0.294648	0.0347406	0.393962	0.404545
BEND6	0.291673	0.0348774	0.394711	0.403721
CLEC6A	-0.283389	0.0349925	0.394946	0.403463
HSD3B2	0.322433	0.0349826	0.395101	0.403292
IL21R	-0.324807	0.0349591	0.395101	0.403292
CYP4F3	-0.3023	0.0350355	0.395164	0.403222
RAB44	-0.273057	0.0350649	0.39523	0.403151
SLITRK6	0.314721	0.034947	0.395231	0.403149
RASSF3	-0.306569	0.0351031	0.395394	0.40297
TMSB4X	-0.310066	0.0351309	0.395441	0.402918
ADGRE1	-0.325818	0.0352059	0.395487	0.402867
SIGLEC15	0.292265	0.0352336	0.395533	0.402817
APOL1	0.290543	0.0352734	0.395715	0.402617
LYSMD2	-0.350969	0.0352051	0.395744	0.402585
PTPN12	-0.323588	0.0351837	0.395769	0.402558
ROBO2	0.283355	0.035335	0.39614	0.402151
IQSEC3	-0.310779	0.0353723	0.396293	0.401983
NOM1	0.313071	0.0354447	0.396574	0.401676
TMEM37	-0.321164	0.0354447	0.396838	0.401386
DDX4	0.311127	0.035568	0.396892	0.401328
RPGR	0.328557	0.0355449	0.396899	0.40132
TEX12	0.286299	0.0355369	0.397074	0.401128
MLPH	0.297741	0.0355268	0.397226	0.400962
MLLT11	0.286623	0.0357706	0.397562	0.400595
PLAU	-0.295641	0.0357494	0.397591	0.400564
CEBPD	-0.294125	0.0357334	0.397676	0.40047
LRRC8D	0.365459	0.0356655	0.397715	0.400428
CRYL1	-0.30469	0.035691	0.397733	0.400408
OR56A3	0.270985	0.0357236	0.397832	0.400301
MYCT1	-0.290443	0.0358933	0.397869	0.40026
ADGRB1	-0.28952	0.0358232	0.397882	0.400246
C3orf67	0.287387	0.0358497	0.397913	0.400212
FNDC7	0.313955	0.0358856	0.398047	0.400066
TFEC	-0.331971	0.0361354	0.399494	0.398489
ADM5	0.295012	0.0360676	0.399536	0.398444
LRP8	0.290333	0.036118	0.399566	0.398412
VMO1	-0.30344	0.0365081	0.399655	0.398315
ASTN2	0.272511	0.0361052	0.399688	0.398278
VOPP1	0.299042	0.0361833	0.39976	0.398201
ADSSL1	-0.340147	0.036495	0.399774	0.398186
CACNA1I	-0.284349	0.0363293	0.39979	0.398168
CCDC22	-0.289871	0.0364738	0.399803	0.398154
TRPC1	-0.295863	0.0365557	0.399914	0.398033
HIST2H3PS2	-0.295165	0.0364667	0.399986	0.397955
ZNF516	-0.298438	0.0363285	0.400044	0.397892
WNK3	-0.293348	0.0362627	0.400109	0.397822
KCNS2	0.299684	0.0364573	0.400145	0.397782
CAPZB	-0.263536	0.0362941	0.400192	0.397732
IRAK1	0.259325	0.0363187	0.400199	0.397724
CMTM2	-0.307063	0.036248	0.40021	0.397712
SIGLEC5	-0.280547	0.0366089	0.400235	0.397685
CBWD6	0.328476	0.0364491	0.400318	0.397595
FLNB	-0.292593	0.0364107	0.400422	0.397482
KLHL6	-0.283299	0.0364377	0.400456	0.397446
MICU3	-0.29692	0.0367565	0.401586	0.396221
GOLGB1	0.301594	0.0368506	0.402352	0.395394
C6orf132	0.314243	0.0369066	0.402701	0.395018
PM20D1	-0.294946	0.0369452	0.402859	0.394847
CSPG5	0.298067	0.0370402	0.403369	0.394297
OR5C1	0.322989	0.0370289	0.403509	0.394146
ECM1	0.310611	0.0370805	0.403546	0.394107
MAP7D2	-0.296073	0.0371887	0.404461	0.393124
SEC14L4	-0.273041	0.037647	0.404971	0.392576
F2RL2	0.323162	0.0375749	0.404976	0.392571
NKPD1	0.297738	0.037722	0.404998	0.392547
NCF1	-0.250397	0.037675	0.405013	0.392532
XIRP1	0.297207	0.0375574	0.405049	0.392492
TBCC	0.254335	0.0376301	0.40505	0.392492
LRP3	-0.297758	0.0375346	0.405064	0.392476
ULK2	-0.340863	0.0374643	0.405089	0.39245
TIMM50	0.320522	0.037489	0.405094	0.392444
AGO1	-0.309399	0.0380487	0.405126	0.39241
COLEC10	-0.298863	0.0378085	0.405146	0.392389
CRYBG1	-0.304435	0.037713	0.40516	0.392373
NPNT	0.280661	0.037933	0.405183	0.392348
CYP4F22	-0.289687	0.0375221	0.40519	0.392341
ANGPTL6	0.296206	0.0373371	0.405284	0.39224
CACTIN	0.279952	0.0376284	0.405292	0.392232
RAB9B	-0.287786	0.0380427	0.40532	0.392202
MPZL3	-0.322458	0.0374639	0.405346	0.392174
TNFAIP2	-0.284096	0.0378031	0.405348	0.392171
ZNF671	0.250449	0.0379252	0.405359	0.39216
FNDC5	-0.301598	0.0377825	0.405387	0.392131
BEX1	-0.290528	0.0378568	0.405404	0.392111
RGS12	-0.298458	0.037978	0.405406	0.39211
SLC35F4	0.281253	0.0380273	0.405414	0.392101
SLC6A20	0.300195	0.0380104	0.405493	0.392017
TAS1R2	0.321996	0.037334	0.405514	0.391995
NPIPA1	0.325082	0.037894	0.405543	0.391963
SORBS3	-0.264123	0.0374352	0.40556	0.391945
SPATA25	0.302632	0.0374604	0.405571	0.391933
WDFY3	-0.295344	0.0373167	0.405589	0.391914
MCEMP1	-0.309321	0.0379238	0.405603	0.391899
FOXRED1	0.294265	0.0374004	0.405708	0.391786
GRIN3B	0.295452	0.0374311	0.405779	0.391711
DYRK2	-0.324584	0.0381994	0.406472	0.390969
TBL1X	0.29462	0.0382833	0.40659	0.390843
OR2L13	-0.27202	0.0382702	0.406709	0.390716
POTEF	0.26325	0.0382522	0.406775	0.390645
GOLGA2	0.304717	0.0383641	0.406932	0.390478
LMNB2	0.250627	0.0383469	0.407007	0.390398
ZNF275	0.23748	0.038455	0.407638	0.389726
TSKS	-0.313158	0.0384818	0.407664	0.389698
ITGB5	-0.315146	0.0385093	0.407697	0.389663
NRIP2	0.304635	0.0386738	0.40789	0.389457
A2M	-0.301444	0.0385525	0.407896	0.38945
MIB2	0.284354	0.0386582	0.407983	0.389358
DRP2	0.26121	0.0387713	0.408147	0.389183
RAB19	-0.286763	0.0386017	0.408159	0.389171
KRT19	0.293459	0.0386534	0.40819	0.389138
EXOC3L1	0.286584	0.0387511	0.408191	0.389136
XRCC2	0.307426	0.0388026	0.408219	0.389106
TAX1BP3	-0.341887	0.0387351	0.408279	0.389042
PKD2L1	-0.293652	0.0386458	0.408367	0.38895
S100A12	-0.311582	0.0388424	0.408382	0.388934
B3GALT6	0.315978	0.0388702	0.408418	0.388895
SLC45A2	0.307781	0.0389892	0.408898	0.388385
TNNC2	-0.29724	0.0390189	0.408953	0.388326
TTR	0.310664	0.0390486	0.409008	0.388268
CBWD2	0.278728	0.0389824	0.409083	0.388189
CTSB	-0.294272	0.0391191	0.409234	0.388028
SYPL1	-0.290361	0.0389818	0.409333	0.387923
MRAS	-0.282656	0.0391116	0.409412	0.387839
ARNT	-0.291706	0.0391983	0.409551	0.387691
IKZF1	-0.288758	0.0391913	0.409734	0.387498
DCDC1	0.253682	0.0392652	0.409994	0.387222
ZNF837	0.28179	0.0393226	0.410082	0.387129
AC005837.2	0.303096	0.0393024	0.410127	0.387081
ANKRD53	-0.263229	0.0393861	0.410489	0.386699
IL7R	-0.293822	0.0394206	0.410592	0.38659
FOXM1	0.2758	0.0397242	0.410942	0.38622
ZNF236	-0.265123	0.0396664	0.411106	0.386046
ADGRV1	0.268148	0.0396958	0.411156	0.385993
GRTP1	-0.290962	0.0397204	0.411156	0.385993
BDKRB1	0.271101	0.0397748	0.411211	0.385935
S1PR4	-0.319125	0.039657	0.411263	0.38588
TTC7B	-0.276388	0.039626	0.411452	0.385681
DGKB	0.274163	0.0396528	0.411474	0.385657
EXO5	-0.338919	0.0395563	0.411493	0.385637
DCAF12L2	0.290237	0.0399175	0.411669	0.385452
BOP1	0.286433	0.0395487	0.41167	0.385451
HIST1H3I	-0.30256	0.0396237	0.411683	0.385437
CD34	-0.270352	0.0398741	0.411729	0.385389
MEGF9	-0.3136	0.0398506	0.411741	0.385376
NHLRC1	-0.283995	0.0396079	0.411774	0.385341
CHST13	-0.254169	0.0399058	0.411802	0.385311
TIMM44	0.279455	0.0400319	0.412341	0.384744
VTN	0.293138	0.0400198	0.41247	0.384608
JAK1	-0.278237	0.0401063	0.4126	0.384471
CSGALNACT1	-0.28982	0.0401028	0.412817	0.384242
DNAJB1	0.294444	0.0402269	0.413586	0.383434
NPIPA8	0.300218	0.0403895	0.415003	0.381949
MEFV	-0.287506	0.040718	0.415826	0.381089
HTR6	0.287843	0.0407718	0.415868	0.381045
CABP5	-0.271341	0.0406994	0.415889	0.381022
UNG	0.271462	0.0408018	0.41592	0.38099
LYVE1	-0.296901	0.0407524	0.415923	0.380987
GREB1L	0.305201	0.0406916	0.416063	0.380841
WDR33	-0.298415	0.040521	0.416098	0.380804
CTSS	-0.299961	0.040896	0.41612	0.380781
FBXL16	0.284234	0.0408469	0.416127	0.380775
C1QL1	0.293782	0.0405517	0.416158	0.380741
CCNG2	-0.376402	0.0406804	0.416204	0.380694
GOLIM4	0.268741	0.0406311	0.416208	0.38069
CAPG	-0.288949	0.0408861	0.416272	0.380623
PIK3AP1	-0.299218	0.040937	0.416284	0.380611
LAPTM5	-0.316686	0.0409627	0.416293	0.380601
HCFC1	0.288011	0.0406213	0.416362	0.380529
ANKRD28	0.305601	0.0406757	0.41641	0.380479
GPR4	0.259788	0.0409996	0.416415	0.380474
XCL2	-0.280589	0.0406169	0.416572	0.38031
TMEM104	0.194162	0.0413055	0.416992	0.379873
SOD2	-0.266851	0.0411317	0.416997	0.379867
ICOS	-0.27398	0.04109	0.41708	0.37978
TRPS1	-0.331428	0.0412665	0.4171	0.379759
RHCE	-0.268786	0.0413053	0.41724	0.379614
KRT6A	0.283476	0.0411315	0.417248	0.379606
LRFN2	-0.259183	0.0413605	0.417295	0.379557
TNPO2	0.28758	0.0412633	0.41732	0.379531
OR51I2	0.293467	0.0413916	0.417357	0.379492
RNASE10	0.311519	0.0412471	0.417409	0.379439
BMX	-0.280366	0.0412337	0.417525	0.379317
PPP1R21	-0.314175	0.0412239	0.417679	0.379158
SLC46A3	-0.309323	0.0416783	0.41949	0.377278
PDE9A	-0.292792	0.0416597	0.419555	0.377211
SUCO	-0.322285	0.0416488	0.419698	0.377064
CMA1	0.294063	0.0418108	0.419813	0.376944
MAP2K2	0.278273	0.0417631	0.419839	0.376918
KDM5D	0.286399	0.041792	0.419877	0.376878
BMP7	0.292179	0.0417621	0.42008	0.376668
PPP1R3E	0.289633	0.0419369	0.420828	0.375896
LRRC25	-0.316579	0.0419945	0.421153	0.37556
KIF26B	0.291568	0.0420465	0.42117	0.375543
CPNE7	-0.293324	0.042044	0.421397	0.375309
SEPTIN10	-0.277877	0.0421725	0.421423	0.375282
ACTC1	0.296226	0.0421602	0.421551	0.375149
CRB3	-0.288347	0.0421509	0.421711	0.374985
AHRR	0.286363	0.0421481	0.421935	0.374755
CMIP	-0.256032	0.0423666	0.422354	0.374324
PTGER1	0.302534	0.0423463	0.422403	0.374273
DHX37	0.285585	0.0423409	0.422601	0.37407
NPIPB12	0.279545	0.0424262	0.422696	0.373971
IL13RA2	0.249903	0.0423338	0.422783	0.373883
TBXAS1	-0.284174	0.0426847	0.423758	0.372882
ELF1	-0.303857	0.0427607	0.423759	0.372882
SIMC1	-0.26145	0.0427894	0.423792	0.372847
MED26	0.326524	0.0426647	0.423811	0.372828
IER3	-0.274648	0.0427255	0.423912	0.372724
PEAR1	-0.282577	0.0426253	0.423923	0.372713
ANGPT1	-0.283792	0.0426525	0.423942	0.372694
SIK1	0.250563	0.0427558	0.423962	0.372673
WDR87	0.310332	0.0426121	0.424043	0.37259
FOLR2	-0.319	0.0426043	0.424218	0.372411
PEX3	-0.225563	0.0428603	0.424244	0.372385
FOXF2	0.296084	0.0429148	0.424531	0.37209
UNC5D	0.287715	0.0431803	0.424649	0.37197
REX1BD	0.294001	0.0432078	0.42467	0.371949
KLC2	0.266457	0.0431662	0.424759	0.371857
AIFM3	-0.282589	0.0430901	0.42476	0.371857
GP9	-0.262101	0.0432723	0.424805	0.371811
KCNMB1	-0.272162	0.0433268	0.424841	0.371774
SYT2	0.293275	0.0431505	0.424855	0.37176
UBE2K	0.308538	0.0430858	0.424968	0.371644
MYOM2	-0.296361	0.0430648	0.425011	0.371599
RGMA	0.280713	0.043269	0.425022	0.371589
DDX54	0.26547	0.0431423	0.425024	0.371586
UPK1B	0.304594	0.0433203	0.425027	0.371584
MRC2	-0.291786	0.0430025	0.425148	0.37146
OR52D1	0.282754	0.043063	0.425244	0.371362
HOXA10	-0.27779	0.0433977	0.425287	0.371318
CD14	-0.297349	0.043048	0.425346	0.371257
MYH7	0.274831	0.0434316	0.425371	0.371232
KNDC1	-0.272202	0.0434679	0.425477	0.371124
TOR3A	0.306503	0.0435916	0.426438	0.370144
SCIMP	-0.332869	0.0436303	0.426567	0.370012
OSBPL5	-0.251118	0.043743	0.426672	0.369906
TTLL1	-0.296763	0.0437203	0.4267	0.369877
KL	-0.292122	0.043678	0.426785	0.369791
JAKMIP1	-0.286131	0.0437813	0.426797	0.369778
HIVEP3	-0.304998	0.0437144	0.426892	0.369682
HIST1H4E	0.273494	0.043821	0.426936	0.369637
ROPN1L	-0.277313	0.043851	0.426979	0.369593
HOGA1	0.280615	0.0439618	0.427065	0.369506
CARD17	0.26847	0.0439111	0.427068	0.369503
RIN3	-0.297609	0.0439519	0.427217	0.369352
MCAT	0.376991	0.0439079	0.427285	0.369282
GYS1	0.283679	0.0440782	0.427451	0.369114
NSG1	0.28932	0.0440437	0.427612	0.36895
ATP2A1	0.318271	0.0440722	0.427641	0.368921
BAIAP2L1	-0.277969	0.0441608	0.428005	0.368551
MNT	0.283986	0.0442702	0.428321	0.368231
C19orf53	0.280491	0.044245	0.428324	0.368227
SERPINA1	-0.327133	0.0442216	0.428345	0.368206
CFAP43	0.285471	0.0443701	0.428544	0.368005
COL11A1	0.28664	0.0443558	0.428653	0.367894
PLCL1	-0.29027	0.0443403	0.428751	0.367795
STEAP2	0.282185	0.0444225	0.428803	0.367742
ALS2CL	-0.267308	0.0444756	0.42882	0.367725
ATP13A4	-0.274981	0.044461	0.428927	0.367617
DNAH8	-0.276565	0.0446235	0.429011	0.367532
FAM156A	0.247321	0.0446788	0.429049	0.367493
CHD3	-0.268471	0.0445814	0.4291	0.367442
ANKRD12	-0.292331	0.0446096	0.429124	0.367417
TP73	-0.282415	0.0446653	0.429166	0.367375
CSF1	-0.317664	0.0445798	0.429331	0.367208
RNASEL	-0.315079	0.0445634	0.429419	0.367118
USP43	-0.274765	0.0447721	0.429453	0.367085
IGSF6	-0.256311	0.0447694	0.429673	0.366862
ZNF469	-0.269018	0.0448223	0.429689	0.366846
IFRD2	0.273488	0.045039	0.431519	0.365
LILRB5	-0.297431	0.0450658	0.431528	0.364991
ZNF251	0.265968	0.0451829	0.431908	0.364609
ERICH6	0.291466	0.0451622	0.431957	0.364559
THBS1	-0.268234	0.0451389	0.431981	0.364535
NPAS1	0.289635	0.0452745	0.432537	0.363977
FMR1	0.303521	0.0453031	0.432563	0.363951
DNAJB5	0.319259	0.045332	0.432593	0.363921
BAIAP3	-0.273317	0.0453848	0.43285	0.363663
CEMP1	0.302968	0.0456493	0.433397	0.363114
ZNF816-ZNF321P	0.288719	0.0456259	0.43342	0.363091
TM4SF4	0.313018	0.045603	0.433449	0.363062
RABEP1	-0.298735	0.045484	0.433548	0.362963
RAD23A	0.246557	0.0457717	0.433575	0.362936
LCK	-0.282857	0.045515	0.433597	0.362914
GAR1	0.324969	0.0456018	0.433683	0.362827
CXCL12	-0.290492	0.0457578	0.433689	0.362822
CAT	-0.272824	0.0455782	0.433705	0.362805
DBNDD1	-0.275406	0.0455667	0.433842	0.362668
NTNG2	-0.279047	0.045751	0.43387	0.362641
CD1C	-0.279546	0.0457438	0.434047	0.362463
MAP7	-0.26922	0.0458485	0.434057	0.362453
IER5L	0.279805	0.0458774	0.434085	0.362425
CHEK2	0.278208	0.0459654	0.434181	0.362329
SLC35F5	-0.32095	0.0459295	0.434332	0.362178
ZNF791	0.244095	0.0459562	0.434339	0.362171
SARAF	-0.306971	0.0463249	0.435365	0.361146
RASGRP3	-0.288652	0.0462921	0.435546	0.360966
TMIGD3	-0.293584	0.0463188	0.435553	0.360959
RNF19B	-0.297731	0.046269	0.435574	0.360938
OAZ2	-0.270307	0.0461553	0.435729	0.360784
SH3KBP1	-0.308288	0.0461892	0.435803	0.36071
TPM1	-0.240809	0.0462689	0.435818	0.360694
SKAP2	-0.331672	0.0462657	0.436033	0.36048
SNX9	-0.301176	0.0464395	0.436198	0.360316
SLA2	-0.283394	0.0462637	0.43626	0.360255
AC074143.1	0.270474	0.0464874	0.436403	0.360112
TRAPPC1	-0.298277	0.0466444	0.437386	0.359135
INAFM1	0.279829	0.0466191	0.437394	0.359128
GSG1L	0.28738	0.0466759	0.437437	0.359085
RIMS2	0.289118	0.0468603	0.438428	0.358102
INO80B	0.295237	0.0471545	0.438485	0.358046
NR1H3	-0.295309	0.0476284	0.438506	0.358025
HASPIN	0.318356	0.0468165	0.438508	0.358022
PTN	0.273588	0.0472103	0.438516	0.358014
ELK4	-0.297857	0.0471868	0.438541	0.35799
SDCBP	-0.289857	0.0469012	0.438566	0.357965
ARID3B	0.278993	0.0468552	0.438626	0.357906
DPH2	0.254492	0.0476691	0.43864	0.357892
TNFRSF21	-0.27716	0.0474632	0.438674	0.357858
SOX1	0.266554	0.0471517	0.438702	0.35783
WDR34	0.243189	0.0474416	0.438717	0.357815
AC007326.4	0.270912	0.047628	0.438744	0.357789
CYSLTR2	-0.30201	0.0475774	0.43876	0.357772
CTDSPL	-0.297469	0.0474989	0.438761	0.357772
HIST1H4L	-0.309644	0.0472937	0.438804	0.35773
PDE6G	-0.306925	0.0472716	0.438842	0.357692
PRRT3	0.275832	0.047145	0.438884	0.357651
LILRB3	-0.279454	0.0476196	0.438908	0.357627
P2RX5	-0.261845	0.0475684	0.438919	0.357616
CGN	-0.223146	0.0470977	0.438932	0.357603
AKT3	-0.28571	0.0474412	0.438956	0.357579
ITPKB	-0.30108	0.047549	0.438982	0.357553
UGT2B7	0.301426	0.0471364	0.439048	0.357488
AGBL2	0.285103	0.0470658	0.439123	0.357414
FADS1	-0.307155	0.0470973	0.439172	0.357365
GULP1	-0.277649	0.0474409	0.439195	0.357342
DIRAS2	-0.285731	0.0478099	0.439211	0.357327
CERKL	0.289603	0.0474252	0.439293	0.357245
ABAT	-0.264976	0.0470077	0.439316	0.357223
DOK1	-0.268604	0.0470609	0.439323	0.357216
OSBP2	-0.24342	0.0470391	0.439364	0.357175
LDB3	0.278123	0.0478012	0.439372	0.357167
GAREM1	-0.28817	0.0473865	0.439421	0.357119
TAF12	0.297014	0.0474237	0.439523	0.357019
MMP7	0.291101	0.0478002	0.439604	0.356938
PDE3A	-0.284326	0.0479065	0.439615	0.356927
RGS16	0.282978	0.0478961	0.439761	0.356783
ADAMTS10	-0.273381	0.0480373	0.440575	0.35598
ARRDC2	-0.278703	0.0481132	0.440788	0.355771
GBP6	0.278748	0.0480876	0.440794	0.355764
GRB10	-0.283464	0.048275	0.441063	0.3555
SPINK4	0.286375	0.048264	0.441203	0.355361
CHPF	0.230733	0.048326	0.441288	0.355278
REL	-0.304382	0.0484659	0.441361	0.355206
CCDC74A	0.276248	0.0482563	0.441374	0.355193
ZC3HAV1L	-0.303212	0.0482344	0.441415	0.355153
LMBRD1	-0.334402	0.0484564	0.441515	0.355054
CRISPLD2	-0.275276	0.048379	0.441531	0.355039
CXCL3	-0.286308	0.0484443	0.441645	0.354927
CACNB3	-0.309105	0.0482343	0.441655	0.354917
KIF3C	-0.278409	0.0485349	0.44175	0.354824
BCAM	-0.298156	0.0485616	0.441752	0.354822
SIM2	0.285391	0.0484336	0.441789	0.354785
HIST1H2BG	0.273837	0.0490429	0.442046	0.354532
DTX1	-0.286706	0.0492602	0.4421	0.354479
OXLD1	0.276534	0.0491395	0.442203	0.354378
PHF20	-0.264164	0.049246	0.44221	0.354371
OMD	0.290952	0.0490353	0.442216	0.354365
P2RX5-TAX1BP3	0.278944	0.0486396	0.442222	0.35436
RHOH	-0.284483	0.0489594	0.442247	0.354335
SLC25A47	0.292519	0.0490149	0.442271	0.354312
PLAUR	-0.279498	0.0489378	0.44229	0.354293
BARX2	0.286632	0.0489931	0.442312	0.354271
MST1	0.272146	0.0489169	0.44234	0.354244
NIPAL4	-0.213931	0.049131	0.442364	0.35422
IGSF8	0.296387	0.0492414	0.442406	0.354179
CATSPERB	-0.25447	0.0487392	0.442406	0.354179
HEATR5A	-0.303866	0.0492219	0.442468	0.354118
NXPE2	0.289415	0.0491205	0.442508	0.354079
PCDHB13	0.258155	0.0489126	0.44254	0.354047
OR2D3	0.271428	0.0492037	0.442542	0.354045
SOWAHC	-0.290858	0.0487279	0.442543	0.354044
G0S2	-0.291371	0.0493392	0.442572	0.354016
CFAP157	0.324317	0.0487881	0.44261	0.353979
ADGB	-0.269168	0.0488956	0.442626	0.353963
ZNF444	0.264227	0.048711	0.44263	0.353959
PILRB	0.300631	0.0488728	0.442659	0.353931
LAYN	-0.275074	0.0494018	0.442659	0.35393
QPCT	-0.290677	0.0493792	0.442694	0.353896
MAGED4B	-0.250737	0.0488546	0.442734	0.353857
NDUFA11	0.303285	0.0494732	0.442825	0.353768
MEX3D	0.267498	0.0494554	0.442902	0.353692
ACSL1	-0.284684	0.0488469	0.442904	0.353691
SNX10	-0.305217	0.0495354	0.443145	0.353454
RAB15	-0.272077	0.0496375	0.443821	0.352792
HMGCS2	0.292694	0.0496999	0.443904	0.352711
OMA1	-0.293277	0.0496894	0.444048	0.35257
TMED6	0.284775	0.0497781	0.444366	0.35226
VAMP8	-0.285381	0.0498233	0.444532	0.352097
BCL11A	-0.298618	0.0498747	0.444753	0.351881
FAM207A	0.328761	0.0499706	0.445134	0.351509
ZBED6CL	0.298503	0.0499689	0.445356	0.351292
PYHIN1	-0.309338	0.050228	0.445767	0.350892
BRI3	-0.336769	0.0500726	0.445806	0.350854
PLCD1	-0.324691	0.0502185	0.445919	0.350744
CD4	-0.278682	0.0502116	0.446094	0.350574
NCF2	-0.275301	0.0502034	0.446258	0.350414
PTPRS	-0.274413	0.0501979	0.446446	0.350231
PPP1R36	-0.284967	0.0501971	0.446676	0.350007
CDO1	-0.280943	0.0504522	0.447519	0.349189
WDR74	0.251654	0.0505074	0.447772	0.348943
STAU1	-0.238626	0.0505619	0.447781	0.348935
MGAT4A	-0.330495	0.0506533	0.447879	0.348839
ZNF703	-0.269277	0.0507384	0.447922	0.348798
CFAP410	0.261368	0.0505615	0.448014	0.348708
BCAS4	-0.265508	0.0506475	0.448064	0.34866
HNRNPAB	0.257089	0.0507311	0.448093	0.348631
NOTCH2	-0.291286	0.0509794	0.448159	0.348568
KIAA0513	-0.23356	0.0508194	0.448164	0.348563
PDK3	-0.335646	0.0507952	0.448187	0.348541
ABLIM2	-0.277921	0.0508505	0.448202	0.348526
TENM1	0.271453	0.0508784	0.448212	0.348517
TBX4	0.282532	0.0510139	0.448226	0.348503
CSAG1	0.240943	0.0509094	0.448249	0.34848
ABCA9	0.262921	0.0509637	0.448256	0.348474
MAGED1	0.270654	0.0506455	0.448284	0.348447
PLAC9	0.286679	0.0509435	0.448313	0.348418
PRRT4	-0.262352	0.0507307	0.448327	0.348406
GNG14	0.285155	0.0511287	0.448999	0.347755
CCNJL	-0.268951	0.051376	0.450935	0.345886
GJC3	0.268434	0.0514759	0.451101	0.345726
NMUR1	-0.25848	0.0514289	0.451162	0.345668
CCDC28B	0.300959	0.0514597	0.451195	0.345635
DUSP4	0.265178	0.051519	0.451243	0.34559
MSC	0.26681	0.0517468	0.451819	0.345035
OR4F3	0.28512	0.0517463	0.452051	0.344812
GYPA	-0.283014	0.0518006	0.452053	0.344811
BNIP3L	-0.245764	0.0516669	0.452065	0.344799
TBC1D8	-0.288475	0.0516479	0.452135	0.344732
RSKR	0.278525	0.0518515	0.452261	0.34461
OR4F29	0.28512	0.0517463	0.452287	0.344586
OR4F16	0.28512	0.0517463	0.452524	0.344359
CAPN15	0.271966	0.0519431	0.452824	0.34407
CLDN10	-0.252005	0.0520015	0.452862	0.344034
CD209	-0.279543	0.0519869	0.452971	0.34393
ZFYVE21	-0.333351	0.0520643	0.453173	0.343736
GNG10	-0.31319	0.0522017	0.454133	0.342817
ZNF628	0.26819	0.0522495	0.454312	0.342645
SH3BGRL	-0.262922	0.0523072	0.454343	0.342616
EGLN3	-0.276394	0.0523919	0.454371	0.342589
TFPI	-0.304594	0.05229	0.454429	0.342534
DTHD1	-0.268959	0.0523856	0.454552	0.342417
DNAJB13	0.286748	0.0524501	0.45464	0.342332
PAXIP1	0.25443	0.052382	0.454756	0.342221
CENPM	0.297812	0.0525998	0.454995	0.341993
DENND4C	-0.300908	0.0526308	0.455028	0.341961
GPR37L1	0.275828	0.0525514	0.455046	0.341944
POSTN	0.279316	0.0525296	0.455093	0.341899
OVOL1	-0.26105	0.0526669	0.455105	0.341888
POM121	0.276524	0.0525862	0.455113	0.341881
ARHGEF10L	-0.306347	0.0527151	0.455286	0.341715
ZNF765	0.269003	0.0527546	0.455393	0.341614
GABRA3	0.239533	0.0529887	0.456707	0.340362
AL355315.1	0.298352	0.0529627	0.456718	0.340352
COL4A6	0.277886	0.0529448	0.456799	0.340275
SLC18A2	-0.263799	0.0531192	0.45689	0.340188
PEBP4	-0.279272	0.0531028	0.456985	0.340098
PIEZO1	0.271503	0.0530906	0.457114	0.339975
VEGFA	0.271845	0.053066	0.457138	0.339953
AC138969.1	0.28342	0.0532193	0.457282	0.339816
WDR62	0.256592	0.053309	0.457348	0.339753
LIX1	0.269334	0.053202	0.457368	0.339734
HOXD1	-0.285803	0.0534358	0.457498	0.339611
GOLGA8M	-0.262083	0.0533861	0.457541	0.33957
SLC16A14	0.274532	0.0534141	0.457546	0.339565
RARRES1	0.271972	0.0533071	0.457566	0.339546
ZNF317	0.24789	0.0533026	0.457763	0.33936
DUSP19	-0.30088	0.0533856	0.457771	0.339352
GTF3C1	0.262157	0.0535778	0.45848	0.33868
MTRNR2L12	-0.282117	0.053623	0.458631	0.338536
RALB	-0.278652	0.0537969	0.459181	0.338017
MAGOHB	0.239053	0.0537802	0.459272	0.33793
SLC28A1	0.281791	0.0537747	0.45946	0.337753
TSHZ3	-0.277639	0.0538588	0.459475	0.337738
PRSS21	-0.272759	0.0537653	0.459613	0.337607
MANSC1	-0.304617	0.0540013	0.459987	0.337255
RNF225	0.281896	0.0539655	0.46015	0.337101
CEP135	-0.269809	0.053996	0.460176	0.337076
PPM1H	-0.281822	0.0540872	0.46025	0.337006
ZDHHC24	0.268467	0.0540605	0.460257	0.337
DARS	-0.277226	0.0541841	0.460372	0.336891
MAP10	-0.272811	0.0541669	0.46046	0.336809
SIGLEC1	-0.275865	0.0541608	0.460642	0.336637
FUT7	-0.269388	0.0542972	0.461099	0.336205
TAX1BP1	-0.269601	0.0543536	0.461344	0.335975
CDH15	0.266476	0.0544926	0.461587	0.335746
RUSC2	-0.279509	0.0544705	0.461634	0.335702
ZNF319	0.26668	0.0544478	0.461675	0.335663
KLRC1	-0.241167	0.0545348	0.461712	0.335629
COPZ2	-0.254569	0.0544403	0.461846	0.335503
MTHFD1L	0.256085	0.0546932	0.462117	0.335248
ZFY	0.270139	0.0546778	0.462221	0.335151
AMN	-0.20558	0.0546693	0.462383	0.334998
HEY2	0.230443	0.0546621	0.462555	0.334836
CCL18	-0.290252	0.0548795	0.462757	0.334647
SRCIN1	0.269952	0.0548789	0.462986	0.334433
DDX21	0.273673	0.0548611	0.463068	0.334355
RASGEF1C	0.295129	0.0548525	0.463229	0.334204
LAMC2	0.274858	0.0549866	0.463427	0.334019
RAB11A	-0.292061	0.0550447	0.463683	0.333779
RGS20	0.272281	0.0552713	0.463725	0.33374
RHOBTB2	-0.256926	0.0552454	0.46374	0.333725
CD8B	-0.277276	0.0552248	0.4638	0.33367
SOWAHA	0.289126	0.0551477	0.463851	0.333622
CLEC18A	0.262968	0.0553167	0.463873	0.333601
C2CD2L	0.280037	0.0551787	0.463878	0.333596
GPSM3	-0.247843	0.0553763	0.463909	0.333568
KIF19	-0.218642	0.0552177	0.463973	0.333508
KAT2A	0.284436	0.0551417	0.464033	0.333451
CNGA1	0.268585	0.0553646	0.464043	0.333442
ARL13A	0.274415	0.0551377	0.464233	0.333264
HRNR	-0.282534	0.0554762	0.464513	0.333002
[truncated: 14,739 more rows]

## Sheet: NDMM_vs_ERMM
GENE	Mean_Diff_zScore_(ERMM-NDMM)	p_value	q_value	Minus_Log(q_value)
ASPM	0.74166	3.54575e-18	2.96744e-14	13.5276
HIST2H3C	0.69175	2.5675e-18	4.29748e-14	13.3668
KIF14	0.72803	2.29073e-17	9.58555e-14	13.0184
STMN1	0.74818	2.26164e-17	1.26184e-13	12.899
TPX2	0.689121	5.79657e-17	1.94046e-13	12.7121
KIF11	0.672838	1.2299e-16	3.43101e-13	12.4646
E2F8	0.693377	1.66555e-16	3.98256e-13	12.3998
HIST1H3F	0.735463	2.59032e-16	5.4196e-13	12.266
NCAPH	0.695143	4.86429e-16	9.0465e-13	12.0435
TFDP1	0.664092	7.96864e-16	1.21254e-12	11.9163
HIST1H3G	0.677182	7.31545e-16	1.22446e-12	11.9121
CENPF	0.678911	9.28176e-16	1.29465e-12	11.8878
PLK1	0.685872	1.07699e-15	1.38667e-12	11.858
KIF4A	0.684893	1.20209e-15	1.43718e-12	11.8425
RRM2	0.644008	3.50733e-15	3.91372e-12	11.4074
DCK	0.685894	4.58298e-15	4.79437e-12	11.3193
HIST2H3A	0.621036	9.57524e-15	9.42767e-12	11.0256
HIST1H3B	0.659808	1.03854e-14	9.65727e-12	11.0151
ZWINT	0.639678	1.45863e-14	1.28498e-11	10.8911
TOP2A	0.669244	1.90594e-14	1.45007e-11	10.8386
NEK2	0.671532	1.75964e-14	1.47264e-11	10.8319
CCNA2	0.672064	1.90252e-14	1.5164e-11	10.8192
CFL1	0.65493	2.99916e-14	2.09166e-11	10.6795
HIST1H1B	0.632811	2.99058e-14	2.17636e-11	10.6623
KNL1	0.629904	3.39221e-14	2.27115e-11	10.6438
KIFC1	0.64603	6.00257e-14	3.86427e-11	10.4129
PPP2R5A	0.663492	7.10638e-14	4.40543e-11	10.356
DIAPH3	0.642135	7.66331e-14	4.58102e-11	10.339
DLGAP5	0.653104	1.19047e-13	6.87107e-11	10.163
FOXM1	0.610807	1.26299e-13	7.04665e-11	10.152
AGPS	0.651998	2.15199e-13	1.16194e-10	9.93482
PLK4	0.668473	2.40011e-13	1.25541e-10	9.90121
MIS18A	0.577225	2.5117e-13	1.27397e-10	9.89484
ARPC5	0.641211	3.27331e-13	1.61143e-10	9.79279
KIF18B	0.645768	3.66517e-13	1.75279e-10	9.75627
TYMS	0.609116	3.85335e-13	1.79159e-10	9.74676
SNX6	0.675635	4.07737e-13	1.84451e-10	9.73412
RIPOR2	0.634883	4.53666e-13	1.99828e-10	9.69934
MCM2	0.614719	5.06998e-13	2.17593e-10	9.66235
KIF15	0.618177	5.43512e-13	2.27433e-10	9.64315
CDK1	0.641101	5.97389e-13	2.4388e-10	9.61282
TPM3	0.617583	6.55624e-13	2.61282e-10	9.58289
HIST1H2AI	0.632662	7.28228e-13	2.83467e-10	9.5475
LCP1	0.628701	8.33488e-13	3.17066e-10	9.49885
CENPK	0.622396	9.2594e-13	3.44408e-10	9.46293
KIF2C	0.624161	9.85224e-13	3.58493e-10	9.44552
TALDO1	0.602503	1.24263e-12	4.42534e-10	9.35405
BRI3BP	0.638939	1.40485e-12	4.89884e-10	9.30991
NUSAP1	0.619633	1.52813e-12	5.11557e-10	9.29111
ITPRIPL2	0.64388	1.50502e-12	5.14104e-10	9.28895
NUF2	0.631177	1.6811e-12	5.51729e-10	9.25827
TUBA1B	0.606146	1.91291e-12	6.15736e-10	9.21061
CDCA8	0.639124	2.09915e-12	6.5066e-10	9.18665
KIF23	0.624046	2.21589e-12	6.62315e-10	9.17894
KCTD12	0.626295	2.09781e-12	6.62512e-10	9.17881
PKM	0.610233	2.19112e-12	6.66818e-10	9.17599
AC104389.6	0.618241	2.33378e-12	6.85312e-10	9.16411
SMC4	0.553323	2.51734e-12	7.26469e-10	9.13878
MTPN	0.625361	2.64531e-12	7.50462e-10	9.12467
CCNF	0.604091	2.76755e-12	7.72053e-10	9.11235
HIST2H4A	0.602567	2.89032e-12	7.93086e-10	9.10068
SAMD9	0.632528	3.26379e-12	8.81119e-10	9.05497
STIL	0.566223	3.8388e-12	1.0199e-09	8.99144
CDCA2	0.622344	4.01421e-12	1.04984e-09	8.97888
TK1	0.578592	4.476e-12	1.15261e-09	8.93832
FKBP1A	0.61954	4.61121e-12	1.16943e-09	8.93203
CDCA3	0.601805	5.48834e-12	1.3711e-09	8.86293
RAP2A	0.621887	5.6599e-12	1.39317e-09	8.856
HIST1H3C	0.557586	5.99671e-12	1.45468e-09	8.83723
BUB1B	0.573418	6.65816e-12	1.59206e-09	8.79804
NCAPG	0.582287	6.94746e-12	1.61509e-09	8.7918
SGO2	0.612064	6.89953e-12	1.62654e-09	8.78874
SPC25	0.621096	7.30718e-12	1.67545e-09	8.77587
FAM83D	0.563869	9.65994e-12	2.18497e-09	8.66055
CDC20	0.599985	9.98715e-12	2.19954e-09	8.65767
TROAP	0.576713	9.95634e-12	2.22199e-09	8.65326
HIST1H2BL	0.592429	1.0805e-11	2.34875e-09	8.62916
DSCC1	0.591221	1.17136e-11	2.51363e-09	8.5997
NEIL3	0.60488	1.28782e-11	2.69445e-09	8.56953
ILK	0.588414	1.3086e-11	2.70411e-09	8.56798
SHCBP1	0.609273	1.36404e-11	2.71802e-09	8.56575
LMNB1	0.585968	1.33185e-11	2.7186e-09	8.56566
ARHGAP11A	0.559717	1.34826e-11	2.71894e-09	8.5656
CTTNBP2NL	0.613393	1.28741e-11	2.72768e-09	8.56421
ALDH1A1	0.603118	1.38869e-11	2.73458e-09	8.56311
TRIP13	0.591515	1.51111e-11	2.94105e-09	8.5315
SPRY2	0.609846	1.5851e-11	3.04959e-09	8.51576
MEMO1	0.571372	1.64799e-11	3.09932e-09	8.50873
CAPZB	0.58753	1.66829e-11	3.10265e-09	8.50827
DEK	0.547521	1.64222e-11	3.12357e-09	8.50535
DEPDC1B	0.616722	1.72257e-11	3.16839e-09	8.49916
CCDC34	0.573427	1.76391e-11	3.20916e-09	8.49361
H3F3A	0.608976	1.9566e-11	3.52146e-09	8.45328
MSRB1	0.566096	2.09956e-11	3.66067e-09	8.43644
GTSE1	0.605634	2.08972e-11	3.68186e-09	8.43393
CCNB1	0.59431	2.0837e-11	3.71031e-09	8.43059
GIMAP6	0.600545	2.18086e-11	3.76322e-09	8.42444
UBE2C	0.610201	2.50158e-11	4.2726e-09	8.36931
CBX3	0.593194	3.33667e-11	5.64133e-09	8.24862
S100A8	0.552707	3.53601e-11	5.74618e-09	8.24062
UHMK1	0.577532	3.4385e-11	5.75536e-09	8.23993
FAM111B	0.59767	3.51016e-11	5.7601e-09	8.23957
SNX10	0.603561	3.49069e-11	5.78487e-09	8.23771
ASF1B	0.581814	4.05716e-11	6.52969e-09	8.18511
MCM10	0.576317	4.1008e-11	6.53707e-09	8.18462
HMGB1	0.560731	4.67638e-11	7.24752e-09	8.13981
HIST1H2BH	0.560421	4.64429e-11	7.26505e-09	8.13876
CDCA4	0.585523	4.6205e-11	7.29603e-09	8.13691
NUCKS1	0.560991	5.32379e-11	8.17519e-09	8.0875
ADH5	0.523619	5.9695e-11	9.0834e-09	8.04175
GIMAP4	0.591439	6.58892e-11	9.93562e-09	8.0028
RAD51AP1	0.582138	6.8635e-11	1.02573e-08	7.98897
HNRNPLL	0.569951	6.94848e-11	1.02924e-08	7.98749
BUB1	0.575497	7.617e-11	1.11836e-08	7.95142
CENPE	0.538044	7.81515e-11	1.13748e-08	7.94406
NDC80	0.575324	8.1171e-11	1.17124e-08	7.93135
HIST1H2BN	0.548709	8.46004e-11	1.21029e-08	7.91711
RACGAP1	0.554462	8.98595e-11	1.27463e-08	7.89461
NUDT1	0.567411	9.09585e-11	1.27938e-08	7.893
CCNB2	0.57768	9.34138e-11	1.30297e-08	7.88507
GLRX5	0.542656	1.07274e-10	1.48393e-08	7.82859
HIST1H3H	0.544761	1.1247e-10	1.54306e-08	7.81162
GCA	0.571802	1.1497e-10	1.56452e-08	7.80562
FAM49B	0.551671	1.17093e-10	1.58057e-08	7.80119
CDKN2D	0.566183	1.31154e-10	1.7562e-08	7.75543
SKA3	0.575107	1.3443e-10	1.78578e-08	7.74817
HIST1H4I	0.558754	1.66268e-10	2.17421e-08	7.6627
UHRF1	0.533523	1.65041e-10	2.17516e-08	7.66251
GART	0.543579	1.78004e-10	2.30963e-08	7.63646
HIST1H4D	0.521956	1.83764e-10	2.36604e-08	7.62598
GLIPR2	0.548663	1.85714e-10	2.37289e-08	7.62472
BIRC5	0.591759	1.93148e-10	2.44917e-08	7.61098
SPTLC2	0.576458	1.96243e-10	2.46971e-08	7.60735
ESCO2	0.582821	1.98216e-10	2.47593e-08	7.60626
ESPL1	0.546233	2.03894e-10	2.5094e-08	7.60043
ARPC2	0.571236	2.0284e-10	2.51491e-08	7.59948
SCCPDH	0.568023	2.24032e-10	2.71728e-08	7.56587
KIF20B	0.565305	2.22761e-10	2.72159e-08	7.56518
MRPL57	0.549832	2.56707e-10	3.09119e-08	7.50987
CD96	0.566534	2.60401e-10	3.0912e-08	7.50987
PSMD4	0.546111	2.59399e-10	3.1013e-08	7.50846
IL21R	0.57437	2.65461e-10	3.12907e-08	7.50458
HIST3H2A	0.562616	2.83574e-10	3.29615e-08	7.48199
ZWILCH	0.553414	2.83069e-10	3.31329e-08	7.47974
DEPDC1	0.556274	2.92398e-10	3.35217e-08	7.47467
HDGF	0.537711	2.92034e-10	3.37108e-08	7.47223
BLVRA	0.539845	2.99871e-10	3.39138e-08	7.46962
HLA-DRA	0.527705	3.04838e-10	3.40159e-08	7.46832
SPAG5	0.511636	2.98939e-10	3.40383e-08	7.46803
TUBA1A	0.54939	3.04565e-10	3.42135e-08	7.4658
FABP5	0.586368	3.18197e-10	3.52714e-08	7.45258
ACTR2	0.559951	3.25278e-10	3.58191e-08	7.44589
NTPCR	0.616905	3.34582e-10	3.66028e-08	7.43649
MSR1	0.578121	3.46572e-10	3.74253e-08	7.42683
IL4R	0.547639	3.45468e-10	3.75484e-08	7.42541
ETS1	0.553469	3.53137e-10	3.78898e-08	7.42148
CDC25C	0.569491	3.58812e-10	3.80113e-08	7.42009
HIST1H4C	0.552384	3.62008e-10	3.81087e-08	7.41898
TRAK2	0.49484	3.58094e-10	3.81769e-08	7.4182
IGFBP7	0.518307	3.65619e-10	3.82483e-08	7.41739
COP1	0.552102	3.73425e-10	3.8346e-08	7.41628
LBR	0.55976	3.71552e-10	3.83892e-08	7.41579
MIF4GD	0.594968	3.71127e-10	3.85834e-08	7.4136
ATAD5	0.549646	3.82942e-10	3.90835e-08	7.40801
CALHM6	0.58895	3.86094e-10	3.91664e-08	7.40709
AIF1	0.549706	3.97734e-10	4.01041e-08	7.39681
CKAP2L	0.549035	4.05896e-10	4.02005e-08	7.39577
SWAP70	0.564523	4.03788e-10	4.02298e-08	7.39545
RAB32	0.569001	4.03085e-10	4.04002e-08	7.39362
HBG2	0.546051	4.14148e-10	4.07765e-08	7.38959
GCLC	0.480528	4.22859e-10	4.11501e-08	7.38563
SUPT16H	0.546185	4.20806e-10	4.11897e-08	7.38521
CENPI	0.538541	4.37066e-10	4.22868e-08	7.3738
CD81	0.557568	4.46492e-10	4.29505e-08	7.36703
HIST1H2BO	0.54029	4.5518e-10	4.3536e-08	7.36115
USP13	0.540202	4.73411e-10	4.50224e-08	7.34657
DCAF6	0.530683	4.83221e-10	4.56958e-08	7.34012
ORC1	0.517981	4.86014e-10	4.57017e-08	7.34007
HLA-DPB1	0.540903	5.00207e-10	4.65137e-08	7.33242
C1QC	0.562599	4.98096e-10	4.65761e-08	7.33184
E2F2	0.518685	5.1367e-10	4.75017e-08	7.32329
FKBP1C	0.590608	5.30495e-10	4.87881e-08	7.31169
ARPC1B	0.54565	5.49172e-10	5.02297e-08	7.29904
EFHD2	0.534296	5.59753e-10	5.09193e-08	7.29312
TRAFD1	0.54987	5.88925e-10	5.29969e-08	7.27575
KIFAP3	0.558447	5.94312e-10	5.31957e-08	7.27412
C1orf112	0.571406	5.88382e-10	5.32342e-08	7.27381
TCF19	0.553127	6.0278e-10	5.36666e-08	7.2703
HMGN1	0.557064	6.17323e-10	5.43829e-08	7.26454
CIT	0.52163	6.16437e-10	5.45922e-08	7.26287
IRF8	0.540736	6.7344e-10	5.90159e-08	7.22903
TACC3	0.520525	6.8235e-10	5.91771e-08	7.22785
PRKDC	0.547449	6.80825e-10	5.93524e-08	7.22656
S100A9	0.52595	7.06253e-10	6.09344e-08	7.21514
PGM2L1	0.549897	7.45015e-10	6.39491e-08	7.19417
TARBP1	0.537816	7.52888e-10	6.42951e-08	7.19182
MRC1	0.555849	7.98461e-10	6.78408e-08	7.16851
ANLN	0.539944	8.14387e-10	6.88445e-08	7.16213
HIST1H2AM	0.509176	8.35696e-10	7.02909e-08	7.1531
YBX1	0.53371	8.67943e-10	7.26382e-08	7.13884
CLSPN	0.505772	8.79125e-10	7.32079e-08	7.13544
GIMAP7	0.553139	8.83666e-10	7.32217e-08	7.13536
AURKB	0.544387	9.18266e-10	7.5714e-08	7.12082
CKS1B	0.522455	9.35884e-10	7.67884e-08	7.1147
PLB1	0.536435	9.73235e-10	7.94635e-08	7.09983
HIST3H2BB	0.565579	1.00181e-09	8.13997e-08	7.08938
RNPEP	0.530806	1.0539e-09	8.48087e-08	7.07156
POLQ	0.512866	1.05079e-09	8.49664e-08	7.07075
HIST1H4A	0.542431	1.0762e-09	8.61886e-08	7.06455
HIST1H2BF	0.495151	1.10605e-09	8.81574e-08	7.05474
PBK	0.548603	1.1283e-09	8.90825e-08	7.05021
PTPN11	0.539976	1.12436e-09	8.91924e-08	7.04967
OGFRL1	0.546181	1.15227e-09	9.01245e-08	7.04516
BANF1	0.542385	1.14996e-09	9.03665e-08	7.04399
FANCI	0.492737	1.17153e-09	9.0783e-08	7.042
RETN	0.533589	1.17003e-09	9.10885e-08	7.04054
HIST1H3I	0.528627	1.18185e-09	9.11607e-08	7.04019
ECT2	0.552108	1.19625e-09	9.18479e-08	7.03693
RASSF3	0.557547	1.3073e-09	9.99162e-08	7.00036
KYNU	0.564049	1.38899e-09	1.02871e-07	6.98771
RBP7	0.55498	1.38657e-09	1.03148e-07	6.98654
HIST1H2AG	0.504158	1.357e-09	1.03243e-07	6.98614
HMGN2	0.529924	1.37803e-09	1.03433e-07	6.98534
TRPS1	0.542628	1.38622e-09	1.03583e-07	6.98471
ANXA3	0.506251	1.37679e-09	1.03805e-07	6.98378
KIF18A	0.549476	1.37123e-09	1.03854e-07	6.98358
BNIP3L	0.491967	1.54191e-09	1.13694e-07	6.94426
SRSF9	0.548179	1.56773e-09	1.1509e-07	6.93896
STARD3NL	0.543589	1.8349e-09	1.33533e-07	6.87441
ETF1	0.538078	1.83084e-09	1.33819e-07	6.87348
S100A12	0.50619	1.86473e-09	1.35117e-07	6.86929
CORO1A	0.539445	1.9118e-09	1.37338e-07	6.86221
KIF20A	0.51883	1.92398e-09	1.37622e-07	6.86131
SUZ12	0.536024	1.90927e-09	1.37747e-07	6.86092
HIST1H2BI	0.544387	1.94617e-09	1.38617e-07	6.85818
CDA	0.539549	1.9739e-09	1.39997e-07	6.85388
TLR2	0.526754	1.99953e-09	1.41215e-07	6.85012
HIST2H3D	0.513997	2.04761e-09	1.44004e-07	6.84163
FPR1	0.534446	2.08851e-09	1.46265e-07	6.83486
PPP4C	0.52326	2.13861e-09	1.4915e-07	6.82638
BATF	0.560754	2.175e-09	1.50434e-07	6.82265
LAGE3	0.493963	2.17262e-09	1.50893e-07	6.82133
IQGAP3	0.536723	2.23153e-09	1.53709e-07	6.8133
POLE2	0.533166	2.29365e-09	1.56062e-07	6.8067
CLDN19	-0.553014	2.29364e-09	1.56698e-07	6.80494
TTK	0.527283	2.28477e-09	1.56731e-07	6.80484
RAB20	0.535023	2.34562e-09	1.57675e-07	6.80224
PPP1CB	0.522736	2.33067e-09	1.57938e-07	6.80151
PPARG	0.535917	2.34103e-09	1.58001e-07	6.80134
ETS2	0.521467	2.4662e-09	1.64459e-07	6.78394
RAP2B	0.53636	2.46529e-09	1.65056e-07	6.78237
NUP155	0.466152	2.54044e-09	1.68737e-07	6.77279
HELLS	0.492284	2.67369e-09	1.76886e-07	6.75231
FNTA	0.540975	2.84567e-09	1.87523e-07	6.72695
SNX1	0.537171	2.93801e-09	1.92849e-07	6.71478
OPN3	0.574098	2.96055e-09	1.93569e-07	6.71316
SH3BGRL	0.521795	2.97415e-09	1.93702e-07	6.71287
CENPA	0.512152	3.00579e-09	1.95003e-07	6.70996
CENPM	0.495757	3.03113e-09	1.95888e-07	6.70799
CACYBP	0.471437	3.05758e-09	1.96838e-07	6.70589
CFH	0.522565	3.09476e-09	1.98468e-07	6.70231
SET	0.529402	3.13438e-09	2.00241e-07	6.69845
PARP4	0.550435	3.27345e-09	2.08331e-07	6.68125
RNASE1	0.53166	3.30784e-09	2.09722e-07	6.67836
ARPC3	0.495525	3.32733e-09	2.10162e-07	6.67745
SLC1A3	0.55434	3.37438e-09	2.12332e-07	6.67298
DOCK11	0.541037	3.41197e-09	2.13893e-07	6.6698
UTP18	0.521874	3.50869e-09	2.19136e-07	6.65929
AGTPBP1	0.515569	3.57142e-09	2.22225e-07	6.65321
ADSS	0.522358	3.58615e-09	2.22314e-07	6.65303
EXO1	0.521712	3.68942e-09	2.27873e-07	6.64231
MS4A7	0.54607	3.70762e-09	2.28155e-07	6.64177
SNX8	0.537852	3.84434e-09	2.35702e-07	6.62764
PSRC1	0.522419	3.93855e-09	2.39721e-07	6.62029
ACOT7	0.507868	3.92527e-09	2.39785e-07	6.62018
TBC1D31	0.515047	4.00138e-09	2.40054e-07	6.61969
PFN1	0.519872	3.95927e-09	2.4011e-07	6.61959
RAP1A	0.541788	3.97376e-09	2.40118e-07	6.61957
RBBP8	0.487059	4.01737e-09	2.40153e-07	6.61951
PSMA7	0.526504	3.99167e-09	2.40333e-07	6.61919
SCLT1	0.511906	4.14852e-09	2.4711e-07	6.60711
DSC2	0.52393	4.30178e-09	2.55331e-07	6.5929
BRCA1	0.508831	4.31824e-09	2.55402e-07	6.59278
NCAPD2	0.462257	4.34893e-09	2.56311e-07	6.59123
ELK4	0.522977	4.38695e-09	2.57645e-07	6.58898
C12orf75	0.539066	4.44092e-09	2.59903e-07	6.58519
NXPE1	-0.523644	4.5144e-09	2.60559e-07	6.58409
GNB4	0.537147	4.51138e-09	2.61285e-07	6.58289
AC087632.2	0.540887	4.55234e-09	2.61846e-07	6.58195
GBP4	0.535894	4.50593e-09	2.61876e-07	6.5819
RANBP1	0.513719	4.49165e-09	2.61956e-07	6.58177
METTL21A	0.531295	4.61051e-09	2.64283e-07	6.57793
CKAP2	0.537406	4.65207e-09	2.65755e-07	6.57552
PRDX3	0.496261	4.71896e-09	2.68659e-07	6.5708
ATP6V1B2	0.520039	4.74171e-09	2.6904e-07	6.57018
HBB	0.48465	4.89297e-09	2.75752e-07	6.55948
TAGLN2	0.525176	4.8778e-09	2.75826e-07	6.55936
FAM72B	0.524619	5.1366e-09	2.88512e-07	6.53984
TICRR	0.503017	5.17606e-09	2.89755e-07	6.53797
CD209	0.522467	5.25038e-09	2.92936e-07	6.53323
CD163	0.516151	5.28377e-09	2.9382e-07	6.53192
KIF5B	0.528749	5.34546e-09	2.95288e-07	6.52975
C9orf40	0.497097	5.34133e-09	2.96037e-07	6.52865
HDGFL3	0.520728	5.42905e-09	2.98919e-07	6.52445
GZMA	0.50546	5.46369e-09	2.9984e-07	6.52311
UBAC2	0.516934	5.76282e-09	3.15223e-07	6.50138
SLC43A3	0.532183	5.88019e-09	3.20595e-07	6.49404
CBL	0.534282	5.9595e-09	3.23864e-07	6.48964
SPC24	0.49533	6.08751e-09	3.2975e-07	6.48182
GPR137B	0.540049	6.11463e-09	3.3015e-07	6.48129
AC068831.7	0.503286	6.15402e-09	3.31209e-07	6.4799
C1QA	0.522635	6.28466e-09	3.37156e-07	6.47217
PLA2G7	0.53326	6.40376e-09	3.42448e-07	6.46541
ARHGAP30	0.502584	6.57001e-09	3.50219e-07	6.45566
CA1	0.465814	6.7055e-09	3.56307e-07	6.44818
SERBP1	0.523059	6.73803e-09	3.56902e-07	6.44745
RHAG	0.503955	6.9087e-09	3.64788e-07	6.43796
SELL	0.501987	7.09241e-09	3.7331e-07	6.42793
MIEN1	0.498913	7.13364e-09	3.74303e-07	6.42678
ZNF330	0.509009	7.21491e-09	3.76209e-07	6.42457
WLS	0.543835	7.21475e-09	3.77377e-07	6.42322
CAPZA2	0.518035	7.50646e-09	3.90196e-07	6.40872
PTPRC	0.498819	7.69633e-09	3.98827e-07	6.39922
TASOR	0.511314	8.05024e-09	4.15879e-07	6.38103
WDR76	0.469954	8.13379e-09	4.18903e-07	6.37789
TUBB	0.500686	8.46067e-09	4.34401e-07	6.36211
IL18	0.517553	8.49291e-09	4.34723e-07	6.36179
IKBKE	0.517587	8.76663e-09	4.47365e-07	6.34934
SERPINB10	0.497343	8.84878e-09	4.48821e-07	6.34793
BST1	0.505131	8.82278e-09	4.48862e-07	6.34789
ABCB10	0.49194	9.0926e-09	4.59795e-07	6.33744
SIGLEC9	0.522276	9.16907e-09	4.62265e-07	6.33511
GNGT2	0.523643	9.21611e-09	4.63241e-07	6.33419
MYD88	0.462581	9.25626e-09	4.63866e-07	6.33361
STAU2	0.468122	9.42264e-09	4.70794e-07	6.32717
LYZ	0.484552	9.73638e-09	4.83583e-07	6.31553
DMD	0.511211	9.71586e-09	4.84e-07	6.31515
CENPU	0.510903	9.8757e-09	4.89051e-07	6.31065
BRI3	0.524872	9.91094e-09	4.89349e-07	6.31038
SKA1	0.494863	1.01577e-08	5.00057e-07	6.30098
HSP90AA1	0.494352	1.03143e-08	5.06276e-07	6.29561
HIST1H2AB	0.52494	1.06655e-08	5.21984e-07	6.28234
CD8A	0.476384	1.07973e-08	5.26893e-07	6.27828
RP2	0.511308	1.11664e-08	5.40183e-07	6.26746
NKG7	0.499361	1.1136e-08	5.40273e-07	6.26739
TESPA1	0.506525	1.12096e-08	5.40709e-07	6.26704
HLA-DMB	0.513396	1.11197e-08	5.41049e-07	6.26676
LPCAT2	0.521331	1.12869e-08	5.42874e-07	6.2653
CNTLN	0.519155	1.14063e-08	5.47045e-07	6.26198
CR1	0.494471	1.15644e-08	5.51468e-07	6.25848
KRTAP5-1	-0.508404	1.15533e-08	5.52511e-07	6.25766
TMOD3	0.512416	1.18528e-08	5.63615e-07	6.24902
ACSL1	0.50748	1.19269e-08	5.65533e-07	6.24754
ARHGDIB	0.487368	1.20472e-08	5.69622e-07	6.24441
LCLAT1	0.523662	1.23578e-08	5.82663e-07	6.23458
SCIMP	0.51484	1.24962e-08	5.87533e-07	6.23097
CAT	0.457314	1.27639e-08	5.98436e-07	6.22298
VSIG4	0.515285	1.2807e-08	5.98783e-07	6.22273
SORD	0.500229	1.28577e-08	5.99479e-07	6.22223
LIPA	0.491744	1.29448e-08	6.01863e-07	6.2205
FAM102B	0.515963	1.30755e-08	6.0458e-07	6.21855
AL031777.3	0.501228	1.30644e-08	6.05741e-07	6.21771
USP2	0.511197	1.32967e-08	6.13115e-07	6.21246
RPS6KA1	0.483161	1.37544e-08	6.32474e-07	6.19896
FEZ2	0.506022	1.48305e-08	6.80089e-07	6.16743
A2M	0.504269	1.50308e-08	6.87391e-07	6.1628
CHD1L	0.475868	1.51539e-08	6.89257e-07	6.16162
SAMHD1	0.491805	1.51454e-08	6.90744e-07	6.16068
HTATIP2	0.480717	1.55518e-08	7.05438e-07	6.15154
USP32	0.453056	1.57082e-08	7.10606e-07	6.14837
PTTG1	0.489349	1.58002e-08	7.1284e-07	6.14701
CCDC150	0.500126	1.58705e-08	7.14087e-07	6.14625
FEZ1	0.519627	1.6048e-08	7.20139e-07	6.14258
PLBD1	0.488638	1.61659e-08	7.2349e-07	6.14057
HNMT	0.51168	1.662e-08	7.41828e-07	6.1297
GIMAP5	0.511141	1.67051e-08	7.43645e-07	6.12863
ARPC4	0.513088	1.70826e-08	7.56426e-07	6.12123
WDR62	0.465368	1.70656e-08	7.57678e-07	6.12052
ALAS2	0.471506	1.71904e-08	7.59188e-07	6.11965
TMSB4X	0.501934	1.76146e-08	7.73839e-07	6.11135
TESC	0.498226	1.75981e-08	7.7515e-07	6.11061
HBD	0.462041	1.80517e-08	7.88901e-07	6.10298
IMPA2	0.525303	1.80069e-08	7.89005e-07	6.10292
CHMP1A	0.486049	1.81464e-08	7.90977e-07	6.10184
WDHD1	0.491954	1.87093e-08	8.13392e-07	6.0897
POC1A	0.514569	1.92418e-08	8.34376e-07	6.07864
YIF1B	0.502501	1.95432e-08	8.45255e-07	6.07301
TMPO	0.492623	1.97624e-08	8.52533e-07	6.06929
TMEM71	0.508106	1.98853e-08	8.55631e-07	6.06771
PARPBP	0.508652	2.00304e-08	8.59662e-07	6.06567
MMS22L	0.503871	2.03098e-08	8.69424e-07	6.06077
2023-03-01	0.508042	2.04672e-08	8.73928e-07	6.05852
ASH2L	0.447202	2.07182e-08	8.82395e-07	6.05434
CD69	0.478266	2.07903e-08	8.83217e-07	6.05393
CCNG2	0.547589	2.15593e-08	9.11263e-07	6.04036
STYX	0.499531	2.15524e-08	9.13278e-07	6.0394
HJURP	0.516213	2.19212e-08	9.24225e-07	6.03422
PSMA5	0.471169	2.40391e-08	1.01097e-06	5.99526
HPSE	0.491229	2.4142e-08	1.01276e-06	5.9945
CDC42	0.495104	2.4671e-08	1.02978e-06	5.98725
SHTN1	0.509793	2.46408e-08	1.03109e-06	5.9867
ARNT	0.506924	2.48296e-08	1.03383e-06	5.98555
MEGF9	0.489159	2.49705e-08	1.03455e-06	5.98525
NCAPG2	0.47776	2.49185e-08	1.03495e-06	5.98508
WEE1	0.501969	2.51548e-08	1.03961e-06	5.98313
IVNS1ABP	0.50161	2.5579e-08	1.05453e-06	5.97694
COX8A	0.502174	2.5844e-08	1.06284e-06	5.97353
CDCA5	0.489541	2.63473e-08	1.07824e-06	5.96728
FCGR3A	0.4996	2.63048e-08	1.07914e-06	5.96692
AP2B1	0.486836	2.65015e-08	1.08191e-06	5.96581
NCOA4	0.47054	2.6573e-08	1.08219e-06	5.9657
EZH2	0.484172	2.69455e-08	1.09204e-06	5.96176
CDT1	0.471846	2.68957e-08	1.09267e-06	5.96151
AUNIP	0.486544	2.7157e-08	1.09796e-06	5.95941
TPGS2	0.489305	2.76783e-08	1.11634e-06	5.9522
TRIM34	0.525427	2.78744e-08	1.12154e-06	5.95018
HMGB3	0.516437	2.81401e-08	1.12952e-06	5.94711
MTMR10	0.523155	2.83699e-08	1.13602e-06	5.94461
CPVL	0.503854	2.86716e-08	1.14263e-06	5.94209
AGGF1	0.464979	2.8613e-08	1.14302e-06	5.94195
FAM160A1	-0.505102	2.8778e-08	1.14415e-06	5.94152
IL32	0.496929	2.92605e-08	1.15783e-06	5.93635
BMP2	0.471259	2.92331e-08	1.15949e-06	5.93573
CDC45	0.460484	2.98161e-08	1.17703e-06	5.92921
RHOA	0.505605	2.99986e-08	1.18145e-06	5.92758
ACTR3	0.497236	3.01291e-08	1.1838e-06	5.92672
STK24	0.491619	3.10435e-08	1.21688e-06	5.91475
SIGLEC7	0.500974	3.14281e-08	1.22908e-06	5.91042
HIST1H2AL	0.484581	3.17049e-08	1.23701e-06	5.90763
USP39	0.486479	3.20999e-08	1.24951e-06	5.90326
EFHC2	0.480526	3.29628e-08	1.28012e-06	5.89275
POLR3GL	0.431909	3.44148e-08	1.33033e-06	5.87604
DDX52	0.43318	3.44128e-08	1.33334e-06	5.87506
COTL1	0.474587	3.52694e-08	1.36023e-06	5.86639
HLA-DPA1	0.488842	3.57997e-08	1.37751e-06	5.86091
C18orf54	0.499584	3.6075e-08	1.38491e-06	5.85858
FTL	0.500378	3.62902e-08	1.38999e-06	5.85699
RPL22	0.440957	3.64937e-08	1.39459e-06	5.85555
MS4A6A	0.483647	3.66097e-08	1.39584e-06	5.85516
STRN	0.510125	3.80513e-08	1.44422e-06	5.84037
ACAA2	0.442387	3.7988e-08	1.4451e-06	5.8401
TCN1	0.485307	3.85578e-08	1.45029e-06	5.83854
TRAPPC1	0.496811	3.85137e-08	1.4519e-06	5.83806
PSMA6	0.473023	3.83531e-08	1.45238e-06	5.83792
PYGL	0.485447	3.87038e-08	1.45252e-06	5.83788
PTBP3	0.482897	3.84605e-08	1.45316e-06	5.83769
TDRD9	0.480713	3.91573e-08	1.46298e-06	5.83476
FGR	0.478762	3.92769e-08	1.46418e-06	5.83441
ATP13A3	0.470687	3.91347e-08	1.46541e-06	5.83404
RDM1	0.471967	3.96086e-08	1.47e-06	5.83268
GASK1B	0.490738	3.95211e-08	1.47001e-06	5.83268
HMMR	0.484619	3.98158e-08	1.47442e-06	5.83138
ZDHHC3	0.488842	4.00794e-08	1.4809e-06	5.82947
MNDA	0.478502	4.11814e-08	1.51827e-06	5.81865
HAUS6	0.491247	4.16764e-08	1.53314e-06	5.81442
MTHFD1	0.489302	4.18635e-08	1.53665e-06	5.81343
ALYREF	0.438856	4.23724e-08	1.55192e-06	5.80913
CHI3L1	0.49379	4.25123e-08	1.55365e-06	5.80865
HIST1H2BJ	0.433444	4.34194e-08	1.58334e-06	5.80043
HIST1H2AJ	0.436104	4.35592e-08	1.58499e-06	5.79997
IPMK	0.485688	4.38915e-08	1.59361e-06	5.79762
CEP192	0.487504	4.40711e-08	1.59667e-06	5.79678
TDP2	0.529454	4.44151e-08	1.60566e-06	5.79435
C20orf27	0.510987	4.4703e-08	1.61258e-06	5.79248
RTF2	0.480333	4.57992e-08	1.64857e-06	5.78289
CMKLR1	0.50397	4.64664e-08	1.669e-06	5.77754
STX6	0.45863	4.67822e-08	1.67674e-06	5.77553
KIF22	0.480589	4.71556e-08	1.68652e-06	5.77301
DDX60	0.491807	4.81725e-08	1.71556e-06	5.7656
SCNM1	0.488787	4.81345e-08	1.71786e-06	5.76501
PLCB1	0.49683	4.85838e-08	1.72287e-06	5.76375
DNAJA4	0.465518	4.84958e-08	1.7234e-06	5.76361
MME	0.513472	4.90073e-08	1.73422e-06	5.7609
IPO5	0.500255	4.94395e-08	1.74582e-06	5.758
CPED1	0.526608	4.973e-08	1.75238e-06	5.75637
CERS6	0.48928	5.01802e-08	1.76453e-06	5.75337
TOMM22	0.486502	5.03128e-08	1.76548e-06	5.75314
TMEM178A	-0.474813	5.04952e-08	1.76818e-06	5.75247
OSBPL6	0.481908	5.13296e-08	1.79364e-06	5.74626
PSME3	0.517559	5.18636e-08	1.80853e-06	5.74267
HP	0.47232	5.24172e-08	1.82403e-06	5.73897
PHF19	0.509211	5.27193e-08	1.83074e-06	5.73737
ADCY3	0.490659	5.35098e-08	1.85434e-06	5.73181
RGS19	0.474569	5.36244e-08	1.85447e-06	5.73178
FAS	0.497937	5.38866e-08	1.8597e-06	5.73056
BROX	0.465859	5.42751e-08	1.86925e-06	5.72833
RAD21	0.504887	5.48416e-08	1.88488e-06	5.72472
ACER3	0.432792	5.49711e-08	1.88546e-06	5.72458
COMMD8	0.500304	5.51336e-08	1.88717e-06	5.72419
KPNA3	0.502355	5.5256e-08	1.8875e-06	5.72411
WASF1	0.479705	5.58491e-08	1.90387e-06	5.72036
OAZ1	0.489962	5.60923e-08	1.90828e-06	5.71936
GNPAT	0.440703	5.6553e-08	1.92005e-06	5.71669
HIST2H2BF	0.476291	5.67624e-08	1.92326e-06	5.71596
PYURF	0.506974	5.71957e-08	1.93402e-06	5.71354
DOK2	0.484215	5.86042e-08	1.97766e-06	5.70385
PRDX6	0.480697	5.95621e-08	1.9979e-06	5.69943
TPP1	0.484689	5.93263e-08	1.998e-06	5.69941
PRC1	0.450058	5.95415e-08	2.00122e-06	5.69871
MEST	0.481535	5.99984e-08	2.00851e-06	5.69713
TRPM6	0.483714	6.01483e-08	2.00951e-06	5.69691
MAZ	0.456034	6.06225e-08	2.02131e-06	5.69437
MICU2	0.460703	6.10171e-08	2.03043e-06	5.69241
KDM1B	0.482421	6.26428e-08	2.08039e-06	5.68186
STMP1	0.464003	6.31121e-08	2.09182e-06	5.67947
TENM1	0.485233	6.35087e-08	2.10081e-06	5.67761
KLHDC3	0.473732	6.39235e-08	2.11036e-06	5.67564
PA2G4	0.480413	6.58739e-08	2.17047e-06	5.66345
KLF1	0.463597	6.69879e-08	2.20284e-06	5.65702
DPYSL2	0.466437	6.74584e-08	2.21396e-06	5.65483
JPT1	0.505845	6.79673e-08	2.22629e-06	5.65242
CDC25A	0.456284	6.83293e-08	2.23378e-06	5.65096
TRPV4	0.493565	6.89795e-08	2.25064e-06	5.64769
TRIAP1	0.444459	7.02861e-08	2.28881e-06	5.64039
PI4K2A	0.497043	7.06082e-08	2.29484e-06	5.63925
RGS10	0.470566	7.17192e-08	2.31298e-06	5.63583
GNAQ	0.476793	7.14918e-08	2.31456e-06	5.63553
XRCC5	0.490461	7.16936e-08	2.31662e-06	5.63515
HCST	0.472057	7.14755e-08	2.31852e-06	5.63479
MLC1	0.461649	7.21018e-08	2.32085e-06	5.63435
HIST1H2BK	0.488716	7.27349e-08	2.33225e-06	5.63222
MELK	0.483619	7.26542e-08	2.33414e-06	5.63187
AK2	0.474792	7.40487e-08	2.35633e-06	5.62776
GSR	0.477934	7.40172e-08	2.35981e-06	5.62712
BCL7A	0.480894	7.39764e-08	2.36301e-06	5.62653
CCT5	0.441866	7.38634e-08	2.36391e-06	5.62637
FAM72A	0.448528	7.46793e-08	2.37188e-06	5.62491
ARHGAP17	0.467855	7.61394e-08	2.41368e-06	5.61732
DNA2	0.483528	7.64556e-08	2.41455e-06	5.61716
CEP55	0.480102	7.63731e-08	2.41651e-06	5.61681
HPS1	0.470487	7.70902e-08	2.43001e-06	5.61439
RFC3	0.497938	7.9656e-08	2.50617e-06	5.60099
CHMP7	0.48684	7.9865e-08	2.50803e-06	5.60067
ERI1	0.524982	8.00717e-08	2.50981e-06	5.60036
BPI	0.470829	8.11254e-08	2.53809e-06	5.59549
SESN3	0.468585	8.15064e-08	2.54525e-06	5.59427
GFRA2	0.496515	8.27123e-08	2.5781e-06	5.5887
DPY19L2	0.483343	8.35723e-08	2.59043e-06	5.58663
MDH1	0.453518	8.34474e-08	2.59136e-06	5.58647
CHN2	0.491697	8.37845e-08	2.59221e-06	5.58633
C11orf58	0.48223	8.34367e-08	2.59584e-06	5.58572
TLR4	0.480724	8.42803e-08	2.60274e-06	5.58457
RAP1GDS1	0.5239	8.60227e-08	2.65165e-06	5.57648
RAD51	0.484106	8.66887e-08	2.66727e-06	5.57393
CALM1	0.490941	8.74068e-08	2.68443e-06	5.57115
SCP2	0.483995	8.86319e-08	2.7121e-06	5.56669
G6PD	0.462848	8.84886e-08	2.71268e-06	5.5666
YWHAH	0.445912	9.01581e-08	2.75377e-06	5.56007
PPP1R12A	0.469497	9.04294e-08	2.75703e-06	5.55956
CD24	0.484388	9.18085e-08	2.79398e-06	5.55378
TBL1XR1	0.4834	9.20674e-08	2.79678e-06	5.55334
PARK7	0.479609	9.23176e-08	2.7993e-06	5.55295
HIST2H2AB	0.440435	9.2664e-08	2.79966e-06	5.55289
AP2M1	0.471838	9.25352e-08	2.80082e-06	5.55271
SERPINB8	0.476964	9.38333e-08	2.82988e-06	5.54823
ADO	0.460355	9.47197e-08	2.85147e-06	5.54493
PGRMC1	0.461267	9.59835e-08	2.87401e-06	5.54151
PDE6G	0.475396	9.56733e-08	2.87501e-06	5.54136
HCK	0.469375	9.58649e-08	2.8756e-06	5.54127
TGFBI	0.483011	9.63905e-08	2.88104e-06	5.54045
PCNA	0.473003	9.83291e-08	2.93375e-06	5.53258
RBM3	0.454385	9.90445e-08	2.94983e-06	5.5302
RFC2	0.47789	1.00847e-07	2.99818e-06	5.52314
TNFSF13B	0.490359	1.02358e-07	3.0377e-06	5.51746
CD33	0.477743	1.02641e-07	3.04072e-06	5.51702
HIST1H2BD	0.475638	1.0295e-07	3.04449e-06	5.51648
NCAPD3	0.468459	1.03943e-07	3.06841e-06	5.51309
UTP3	0.475402	1.04276e-07	3.07285e-06	5.51246
MCM4	0.471278	1.0495e-07	3.08727e-06	5.51043
GAPDH	0.474974	1.05936e-07	3.1108e-06	5.50713
PPP4R3B	0.501146	1.06875e-07	3.13287e-06	5.50406
COMMD4	0.509317	1.07318e-07	3.14036e-06	5.50302
CDK19	0.466056	1.08861e-07	3.17994e-06	5.49758
BZW2	0.410336	1.10178e-07	3.21283e-06	5.49311
PREX1	0.465676	1.10724e-07	3.22313e-06	5.49172
LGALS8	0.465872	1.14081e-07	3.30934e-06	5.48026
RNF6	0.500921	1.13945e-07	3.31113e-06	5.48002
JAML	0.462424	1.14584e-07	3.31819e-06	5.4791
TNFAIP8L2	0.47936	1.16966e-07	3.3813e-06	5.47092
PBRM1	0.483935	1.18084e-07	3.40773e-06	5.46753
YWHAG	0.488798	1.18683e-07	3.41913e-06	5.46608
PPP2R5C	0.488762	1.19231e-07	3.42902e-06	5.46483
LY6E	0.494723	1.20575e-07	3.46174e-06	5.46071
LPGAT1	0.483384	1.22149e-07	3.50092e-06	5.45582
SLC4A4	0.47879	1.25417e-07	3.58843e-06	5.4451
HEMGN	0.443688	1.27201e-07	3.63326e-06	5.4397
ME1	0.50145	1.28043e-07	3.64488e-06	5.43832
TYROBP	0.460289	1.27928e-07	3.64779e-06	5.43797
CD36	0.451001	1.29615e-07	3.68336e-06	5.43376
APOC1	0.46985	1.318e-07	3.73278e-06	5.42797
HLA-DMA	0.461262	1.31609e-07	3.73367e-06	5.42786
XK	0.478932	1.32245e-07	3.73905e-06	5.42724
HMBS	0.367672	1.35886e-07	3.83552e-06	5.41618
HMGB2	0.423021	1.36838e-07	3.85589e-06	5.41388
RBM8A	0.464828	1.3724e-07	3.86071e-06	5.41333
SERPINA1	0.466397	1.38624e-07	3.88659e-06	5.41043
ITGB2	0.445613	1.38468e-07	3.88873e-06	5.41019
ME2	0.494171	1.39954e-07	3.91731e-06	5.40701
CALM2	0.466835	1.41424e-07	3.95185e-06	5.4032
FKBP4	0.44215	1.42146e-07	3.9654e-06	5.40171
WSB2	0.48689	1.4273e-07	3.96847e-06	5.40138
TPP2	0.490239	1.42582e-07	3.97093e-06	5.40111
RAD18	0.487793	1.4557e-07	4.04071e-06	5.39354
MSN	0.447426	1.46066e-07	4.04108e-06	5.3935
ADSL	0.497524	1.45875e-07	4.04249e-06	5.39335
CSTA	0.473466	1.46529e-07	4.0472e-06	5.39284
CSF1	0.475358	1.49332e-07	4.11783e-06	5.38533
RNASE2	0.463052	1.5135e-07	4.16661e-06	5.38022
FGF13	0.478964	1.51662e-07	4.16833e-06	5.38004
CD93	0.448902	1.5248e-07	4.18394e-06	5.37841
CD58	0.443774	1.53572e-07	4.207e-06	5.37603
ATAD2	0.445285	1.55331e-07	4.24824e-06	5.37179
REL	0.453407	1.56181e-07	4.25759e-06	5.37084
CEBPA	0.465186	1.5605e-07	4.26095e-06	5.37049
SOS2	0.481401	1.57616e-07	4.28971e-06	5.36757
NCEH1	0.467232	1.59294e-07	4.32835e-06	5.36368
CRYBG1	0.459392	1.6253e-07	4.40912e-06	5.35565
SETD3	0.462801	1.64355e-07	4.4514e-06	5.3515
PRPF40A	0.475038	1.65213e-07	4.46021e-06	5.35065
SRSF1	0.476434	1.64982e-07	4.46117e-06	5.35055
SCD	0.481208	1.67553e-07	4.51611e-06	5.34524
GINS3	0.479941	1.69255e-07	4.54004e-06	5.34294
C1QB	0.469969	1.69093e-07	4.543e-06	5.34266
CKAP5	0.471936	1.68847e-07	4.54366e-06	5.34259
FCER1G	0.471996	1.71916e-07	4.5967e-06	5.33755
XPO1	0.416826	1.71689e-07	4.59798e-06	5.33743
HBA2	0.434566	1.72871e-07	4.61485e-06	5.33584
KCNJ2	0.47344	1.76315e-07	4.69929e-06	5.32797
TMEM131L	0.464126	1.79861e-07	4.77101e-06	5.32139
HPS5	0.41308	1.79799e-07	4.77696e-06	5.32085
CHML	0.493174	1.79642e-07	4.78036e-06	5.32054
GINS2	0.485813	1.8238e-07	4.82255e-06	5.31672
RNF24	0.468317	1.82103e-07	4.82285e-06	5.3167
C6orf62	0.453637	1.8293e-07	4.82945e-06	5.3161
RAN	0.470512	1.84369e-07	4.85979e-06	5.31338
CDC123	0.46478	1.85295e-07	4.87652e-06	5.31189
SLBP	0.475415	1.88307e-07	4.94802e-06	5.30557
POLR3C	0.460146	1.89301e-07	4.95857e-06	5.30464
DHX40	0.458662	1.89108e-07	4.96127e-06	5.30441
HBA1	0.432192	1.90042e-07	4.97019e-06	5.30363
CCDC18	0.479458	1.90459e-07	4.97333e-06	5.30335
GTF3A	0.482633	1.93574e-07	5.04679e-06	5.29699
SLC40A1	0.466983	1.95344e-07	5.07711e-06	5.29438
CTAG2	0.460963	1.9506e-07	5.07762e-06	5.29434
FANCM	0.448138	1.98506e-07	5.15131e-06	5.28808
NXPE4	-0.459254	1.99405e-07	5.16663e-06	5.28679
STK17B	0.466257	2.00764e-07	5.1938e-06	5.28451
MCEMP1	0.455049	2.0335e-07	5.25258e-06	5.27963
MS4A4A	0.464626	2.03741e-07	5.25457e-06	5.27946
STAT5B	0.455727	2.04443e-07	5.26457e-06	5.27864
SGCB	0.449173	2.05534e-07	5.28452e-06	5.27699
STAT6	0.447495	2.06209e-07	5.29375e-06	5.27624
ARL6IP1	0.402548	2.08527e-07	5.34505e-06	5.27205
ATE1	0.491315	2.1272e-07	5.43588e-06	5.26473
GMNN	0.478403	2.12591e-07	5.44089e-06	5.26433
DDX60L	0.466952	2.13621e-07	5.4506e-06	5.26356
GUK1	0.4529	2.14144e-07	5.45562e-06	5.26316
MOB1B	0.466258	2.14571e-07	5.45818e-06	5.26295
PFDN4	0.454084	2.1604e-07	5.48721e-06	5.26065
MND1	0.45845	2.18315e-07	5.53661e-06	5.25676
DARS2	0.448879	2.21175e-07	5.60066e-06	5.25176
GNLY	0.465996	2.22187e-07	5.61777e-06	5.25044
MMP8	0.458566	2.23482e-07	5.64199e-06	5.24857
DCLRE1B	0.485923	2.2417e-07	5.65084e-06	5.24789
HIF1A	0.462277	2.25455e-07	5.65767e-06	5.24736
BRIP1	0.474411	2.24785e-07	5.65783e-06	5.24735
EFR3A	0.483251	2.25301e-07	5.66229e-06	5.24701
LTB	0.443036	2.26156e-07	5.66675e-06	5.24667
DR1	0.481342	2.27579e-07	5.69389e-06	5.24459
PFKP	0.465059	2.28634e-07	5.71176e-06	5.24323
RAB3IL1	0.460343	2.31246e-07	5.76839e-06	5.23895
NCALD	0.468998	2.32861e-07	5.80003e-06	5.23657
RGL1	0.480417	2.34872e-07	5.80692e-06	5.23605
CARD6	0.479245	2.34349e-07	5.81117e-06	5.23574
CSGALNACT2	0.46658	2.34697e-07	5.81119e-06	5.23573
ACVRL1	0.462375	2.35451e-07	5.81266e-06	5.23563
EIF6	0.424469	2.35801e-07	5.81273e-06	5.23562
RPIA	0.457501	2.34178e-07	5.81554e-06	5.23541
PIK3CB	0.474713	2.33974e-07	5.81911e-06	5.23514
SHMT1	0.475652	2.38346e-07	5.86682e-06	5.2316
SLC7A8	0.483279	2.39511e-07	5.88683e-06	5.23012
C17orf49	0.488818	2.43934e-07	5.98677e-06	5.22281
TSPAN14	0.450805	2.49365e-07	6.11109e-06	5.21388
CEBPZ	0.45806	2.50466e-07	6.12909e-06	5.2126
VPS45	0.45849	2.51325e-07	6.14113e-06	5.21175
ATP6V1D	0.440193	2.54139e-07	6.19182e-06	5.20818
SYT11	0.452924	2.54102e-07	6.19994e-06	5.20761
GAS2L3	0.447797	2.5534e-07	6.20302e-06	5.2074
HIST1H1E	0.455475	2.55244e-07	6.20969e-06	5.20693
CLEC12A	0.455774	2.56153e-07	6.21376e-06	5.20665
YOD1	0.47743	2.59011e-07	6.27399e-06	5.20246
PNPO	0.40835	2.62867e-07	6.35818e-06	5.19667
DNAJC8	0.40344	2.63492e-07	6.36411e-06	5.19626
KIF26A	0.44096	2.6447e-07	6.36936e-06	5.1959
CHCHD1	0.430557	2.64946e-07	6.37163e-06	5.19575
WWP1	0.482111	2.64395e-07	6.37671e-06	5.1954
KLHL2	0.4654	2.6593e-07	6.38615e-06	5.19476
ZDHHC20	0.462608	2.67833e-07	6.41342e-06	5.19291
CLEC11A	0.447178	2.67772e-07	6.42115e-06	5.19239
CEP135	0.466534	2.74005e-07	6.55185e-06	5.18364
NAP1L4	0.45867	2.75848e-07	6.58652e-06	5.18134
RRM1	0.455077	2.76375e-07	6.58969e-06	5.18113
CD101	0.451009	2.78578e-07	6.63278e-06	5.1783
ANXA1	0.456636	2.79284e-07	6.64014e-06	5.17782
FOXP1	0.418878	2.80165e-07	6.64222e-06	5.17769
CD109	0.459738	2.80025e-07	6.64831e-06	5.17729
CTNNB1	0.460905	2.81696e-07	6.66907e-06	5.17593
CBX1	0.441028	2.82142e-07	6.6702e-06	5.17586
ZBTB37	0.453761	2.84047e-07	6.70576e-06	5.17355
SNF8	0.461951	2.85848e-07	6.73877e-06	5.17142
SPIB	0.445484	2.86336e-07	6.74078e-06	5.17129
AGTRAP	0.439191	2.86828e-07	6.74287e-06	5.17116
LILRA2	0.443636	2.92357e-07	6.86321e-06	5.16347
DNASE1L3	0.453434	2.93747e-07	6.86695e-06	5.16324
DHRS3	0.452734	2.93541e-07	6.87173e-06	5.16293
ALDH1B1	0.44329	2.93205e-07	6.87348e-06	5.16282
SULT1B1	0.444951	2.97796e-07	6.95191e-06	5.1579
PSMD13	0.463482	3.03098e-07	7.06581e-06	5.15084
HNRNPR	0.471881	3.0491e-07	7.0883e-06	5.14946
COQ5	0.413998	3.04714e-07	7.09361e-06	5.14913
CD3E	0.43833	3.10184e-07	7.20092e-06	5.14261
MICAL2	0.442498	3.14764e-07	7.29711e-06	5.13685
GALNT14	0.473463	3.17033e-07	7.33955e-06	5.13433
MGST2	0.474342	3.22899e-07	7.45474e-06	5.12757
RAB31	0.460842	3.23393e-07	7.45586e-06	5.1275
RUBCNL	0.448037	3.22635e-07	7.45893e-06	5.12732
FDPS	0.455442	3.264e-07	7.51482e-06	5.12408
NOL11	0.47729	3.27311e-07	7.52546e-06	5.12347
BBS7	0.438548	3.28623e-07	7.54526e-06	5.12233
RCC1	0.455101	3.3807e-07	7.75152e-06	5.11061
RFTN1	0.456731	3.42671e-07	7.84628e-06	5.10534
SLA	0.449404	3.44364e-07	7.86353e-06	5.10438
TM6SF1	0.462818	3.44135e-07	7.86902e-06	5.10408
FABP4	0.459967	3.47348e-07	7.92086e-06	5.10123
ENO1	0.454436	3.48681e-07	7.94044e-06	5.10016
POLR2F	0.482229	3.50171e-07	7.96354e-06	5.09889
TRNAU1AP	0.447332	3.5147e-07	7.98223e-06	5.09788
SCPEP1	0.456839	3.53497e-07	8.01739e-06	5.09597
CMAS	0.4247	3.55693e-07	8.05628e-06	5.09387
MARCO	0.457324	3.64118e-07	8.23596e-06	5.08429
PCLAF	0.444633	3.66312e-07	8.27439e-06	5.08226
CAPZA1	0.475124	3.77091e-07	8.50641e-06	5.07025
UBE2T	0.443827	3.7859e-07	8.51725e-06	5.0697
SPATA5L1	0.431342	3.78358e-07	8.5235e-06	5.06938
LYPLA2	0.469502	3.85226e-07	8.64332e-06	5.06332
CAPRIN1	0.466883	3.85011e-07	8.65008e-06	5.06298
SGO1	0.453099	3.88257e-07	8.69965e-06	5.0605
CBFB	0.463896	3.89449e-07	8.70308e-06	5.06033
SLC16A10	0.465505	3.89271e-07	8.71072e-06	5.05995
SRPK1	0.445937	3.9765e-07	8.87449e-06	5.05186
HIST1H4J	0.449289	3.98369e-07	8.8787e-06	5.05165
MIS18BP1	0.462362	4.03686e-07	8.98524e-06	5.04647
HIST1H2BM	0.459794	4.07036e-07	9.02379e-06	5.04461
H2AFX	0.389029	4.07608e-07	9.02453e-06	5.04458
NNT	0.422967	4.066e-07	9.02608e-06	5.0445
BMX	0.444557	4.06319e-07	9.03183e-06	5.04422
MOSPD2	0.471418	4.11856e-07	9.10654e-06	5.04065
POMK	0.473353	4.13967e-07	9.11708e-06	5.04014
OAZ2	0.441274	4.13084e-07	9.12164e-06	5.03993
TDRKH	0.454437	4.13736e-07	9.12399e-06	5.03982
STAT1	0.459428	4.17176e-07	9.17569e-06	5.03736
SMAD2	0.450345	4.20095e-07	9.22776e-06	5.0349
RHOU	0.470718	4.23574e-07	9.29197e-06	5.03189
GPNMB	0.462707	4.2708e-07	9.35662e-06	5.02888
SNX4	0.447746	4.28436e-07	9.37406e-06	5.02807
RHOC	0.428761	4.35417e-07	9.51438e-06	5.02162
BTBD10	0.456748	4.38327e-07	9.56548e-06	5.01929
GPAT3	0.461128	4.40546e-07	9.60139e-06	5.01767
UBFD1	0.453323	4.4279e-07	9.63775e-06	5.01602
PUM2	0.468749	4.43854e-07	9.64834e-06	5.01555
MCM5	0.430307	4.4825e-07	9.71866e-06	5.01239
LCP2	0.450327	4.4932e-07	9.72927e-06	5.01192
KIF24	0.425474	4.48235e-07	9.73094e-06	5.01185
INTU	0.456831	4.57968e-07	9.9037e-06	5.0042
SFT2D2	0.474659	4.60335e-07	9.94205e-06	5.00252
C1orf162	0.443997	4.64542e-07	1.002e-05	4.99913
TTF2	0.435288	4.69504e-07	1.0088e-05	4.99619
TWF2	0.431151	4.68612e-07	1.00948e-05	4.9959
CIITA	0.426205	4.6939e-07	1.00985e-05	4.99574
ANAPC5	0.471503	4.71223e-07	1.0112e-05	4.99516
NPL	0.455583	4.72883e-07	1.01346e-05	4.99419
CALM3	0.446576	4.74323e-07	1.01525e-05	4.99343
CPNE2	0.451241	4.78619e-07	1.02313e-05	4.99007
PVR	0.450734	4.8171e-07	1.02843e-05	4.98783
TRIM10	0.435427	4.86191e-07	1.03667e-05	4.98436
HMOX1	0.449783	4.8711e-07	1.03731e-05	4.98409
PSMA4	0.404344	4.93781e-07	1.05018e-05	4.97874
DTL	0.451813	4.9798e-07	1.05776e-05	4.97561
TLR8	0.446463	5.07454e-07	1.07652e-05	4.96798
NSL1	0.433878	5.15064e-07	1.09128e-05	4.96206
BCCIP	0.435186	5.21054e-07	1.10258e-05	4.95759
PSME2	0.461305	5.22581e-07	1.10302e-05	4.95742
DARS	0.480365	5.22556e-07	1.10436e-05	4.95689
CMTM3	0.450033	5.30608e-07	1.11855e-05	4.95134
MPP1	0.43336	5.33821e-07	1.1225e-05	4.94981
RIOK3	0.426269	5.33256e-07	1.12272e-05	4.94973
S1PR1	0.446194	5.37053e-07	1.12646e-05	4.94828
LRIG1	0.448037	5.36726e-07	1.12719e-05	4.948
UTP6	0.452329	5.41083e-07	1.1335e-05	4.94558
CNOT10	0.434313	5.47266e-07	1.14502e-05	4.94119
GPSM2	0.461374	5.5251e-07	1.15455e-05	4.93759
MFSD14B	0.471542	5.57114e-07	1.16271e-05	4.93453
AURKA	0.431426	5.58574e-07	1.16431e-05	4.93393
SUMO2	0.470697	5.61407e-07	1.16876e-05	4.93227
HIST2H2AA3	0.46391	5.65157e-07	1.17511e-05	4.92992
CYB5A	0.469523	5.73999e-07	1.19201e-05	4.92372
ALDH9A1	0.434434	5.76156e-07	1.19501e-05	4.92263
EXOC5	0.436337	5.81065e-07	1.2037e-05	4.91948
SPIC	0.466016	5.83897e-07	1.20807e-05	4.91791
DAP3	0.462974	5.88273e-07	1.21412e-05	4.91574
IFI27	0.434335	5.87691e-07	1.21442e-05	4.91563
MCM7	0.423721	5.89947e-07	1.21608e-05	4.91504
FLVCR1	0.46738	5.92115e-07	1.21904e-05	4.91398
CDC42BPA	0.439047	5.98172e-07	1.23e-05	4.91009
ZNF90	0.443298	6.01297e-07	1.23491e-05	4.90836
FLAD1	0.424736	6.04204e-07	1.23936e-05	4.9068
B4GALT5	0.427457	6.06819e-07	1.2432e-05	4.90546
OIP5	0.428242	6.10927e-07	1.25009e-05	4.90306
CDK4	0.454635	6.13912e-07	1.25466e-05	4.90147
IFI30	0.446166	6.14829e-07	1.255e-05	4.90136
C3AR1	0.437044	6.18767e-07	1.2615e-05	4.89911
HAUS7	0.421097	6.22278e-07	1.26712e-05	4.89718
HK2	0.452399	6.2387e-07	1.26727e-05	4.89713
FCGR3B	0.450026	6.23117e-07	1.26728e-05	4.89713
AP3M2	0.452209	6.25008e-07	1.26805e-05	4.89686
LZTS3	-0.420695	6.28857e-07	1.27277e-05	4.89525
KCNE3	0.456461	6.28247e-07	1.27307e-05	4.89515
CAMP	0.439972	6.31449e-07	1.27493e-05	4.89451
CLN3	0.45764	6.33829e-07	1.27512e-05	4.89445
UGP2	0.419128	6.33217e-07	1.27543e-05	4.89434
SACS	0.458764	6.3119e-07	1.27595e-05	4.89417
SDC3	0.450678	6.33081e-07	1.27669e-05	4.89392
KLHL7	0.442949	6.38179e-07	1.28233e-05	4.892
MRO	0.454751	6.42739e-07	1.28995e-05	4.88943
POLE4	0.427253	6.54034e-07	1.31104e-05	4.88238
SMPDL3A	0.455654	6.59517e-07	1.31417e-05	4.88135
AHSP	0.427041	6.57007e-07	1.31543e-05	4.88093
SLC2A3	0.427685	6.57811e-07	1.31546e-05	4.88092
ARL11	0.450561	6.59492e-07	1.31568e-05	4.88085
RBL1	0.429558	6.59261e-07	1.31679e-05	4.88048
CHCHD2	0.453949	6.61721e-07	1.31699e-05	4.88042
PYCARD	0.441882	6.64247e-07	1.32045e-05	4.87928
CNIH4	0.444756	6.7513e-07	1.34049e-05	4.87274
DDX28	0.434727	6.80603e-07	1.34976e-05	4.86975
STX10	0.429704	6.85859e-07	1.35696e-05	4.86743
HNRNPK	0.456517	6.85279e-07	1.35742e-05	4.86729
SELENOP	0.462083	6.90248e-07	1.36404e-05	4.86517
CD4	0.439642	6.94146e-07	1.37012e-05	4.86324
RNASEH2C	0.460429	6.97814e-07	1.37574e-05	4.86146
COA6	0.459164	7.06642e-07	1.3915e-05	4.85652
HTR2C	0.422113	7.14188e-07	1.40471e-05	4.85241
DENND5A	0.429287	7.1507e-07	1.40479e-05	4.85239
POU6F2	0.431943	7.17538e-07	1.40634e-05	4.85191
ALDOA	0.443434	7.17369e-07	1.40766e-05	4.8515
SUPT3H	0.467416	7.22708e-07	1.41151e-05	4.85031
CCDC43	0.444336	7.22182e-07	1.41214e-05	4.85012
APEX2	0.459168	7.21348e-07	1.41215e-05	4.85012
SETDB1	0.401183	7.36697e-07	1.43549e-05	4.843
PIGN	0.439932	7.36694e-07	1.43715e-05	4.8425
SAE1	0.443305	7.40465e-07	1.44115e-05	4.84129
ITGB1	0.448008	7.43867e-07	1.44609e-05	4.8398
WDR77	0.466007	7.45613e-07	1.4478e-05	4.83929
ANP32A	0.433988	7.63079e-07	1.47829e-05	4.83024
CXCR1	0.431963	7.62995e-07	1.47984e-05	4.82979
CDCA7	0.440768	7.67676e-07	1.48547e-05	4.82813
VPS35	0.420803	7.79573e-07	1.50155e-05	4.82346
NDUFS2	0.439114	7.76896e-07	1.50158e-05	4.82345
CDC16	0.420897	7.78229e-07	1.50242e-05	4.82321
CTSC	0.444645	7.79302e-07	1.50276e-05	4.82311
ARL13B	0.465462	7.9669e-07	1.53276e-05	4.81453
CCR1	0.453905	7.98023e-07	1.53356e-05	4.8143
NECTIN2	0.449707	8.02623e-07	1.54063e-05	4.8123
MRFAP1L1	0.457328	8.04008e-07	1.54152e-05	4.81205
PSD3	0.443631	8.10923e-07	1.553e-05	4.80883
EFTUD2	0.409015	8.16278e-07	1.55969e-05	4.80696
PIR	0.467505	8.16223e-07	1.56137e-05	4.8065
ELK1	0.446552	8.22351e-07	1.5695e-05	4.80424
CXorf38	0.454595	8.23811e-07	1.5705e-05	4.80396
H2AFY	0.416936	8.25803e-07	1.5725e-05	4.80341
PRKCQ	0.44004	8.27865e-07	1.57285e-05	4.80331
CCT2	0.417457	8.27148e-07	1.57327e-05	4.8032
GCFC2	0.471797	8.30984e-07	1.57699e-05	4.80217
TMEM26	0.44106	8.3194e-07	1.57701e-05	4.80217
MPEG1	0.432246	8.38786e-07	1.5864e-05	4.79959
HADH	0.440297	8.39918e-07	1.58674e-05	4.79949
ABCA13	0.423648	8.3875e-07	1.58812e-05	4.79912
MYL12A	0.441824	8.62028e-07	1.62119e-05	4.79016
TGFBR3	0.444263	8.61732e-07	1.62246e-05	4.78983
HS3ST2	0.444515	8.60793e-07	1.62252e-05	4.78981
APH1A	0.441291	8.60356e-07	1.62352e-05	4.78954
UBA3	0.37302	8.65242e-07	1.62359e-05	4.78952
DHX8	0.446628	8.64547e-07	1.62411e-05	4.78939
ALDH4A1	0.446618	8.72291e-07	1.63498e-05	4.78649
CU639417.1	0.456031	8.75055e-07	1.63833e-05	4.7856
HENMT1	0.446891	8.94431e-07	1.67274e-05	4.77657
TM7SF3	0.392246	9.24734e-07	1.72748e-05	4.76259
NFAM1	0.441177	9.38972e-07	1.75017e-05	4.75692
PLEKHG3	0.439701	9.38701e-07	1.75161e-05	4.75656
PGD	0.425556	9.45205e-07	1.75983e-05	4.75453
PYGO2	0.446314	9.59135e-07	1.78378e-05	4.74866
ADD2	0.421542	9.66053e-07	1.79465e-05	4.74602
TXNRD1	0.397501	9.69925e-07	1.79985e-05	4.74476
GPR65	0.43418	9.80731e-07	1.81788e-05	4.74043
CCL18	0.445001	9.87064e-07	1.8276e-05	4.73812
ABCB1	0.445482	9.98609e-07	1.84693e-05	4.73355
ERO1A	0.443531	1.00927e-06	1.86459e-05	4.72942
KEAP1	0.462486	1.013e-06	1.86942e-05	4.72829
SNX5	0.466896	1.02756e-06	1.89211e-05	4.72305
MYO1E	0.456841	1.02686e-06	1.8929e-05	4.72287
RIT1	0.444471	1.0316e-06	1.89331e-05	4.72278
NLRC3	0.432894	1.0308e-06	1.8939e-05	4.72264
BACE2	0.431958	1.02991e-06	1.89435e-05	4.72254
LAMA5	-0.401688	1.04048e-06	1.9075e-05	4.71954
NDUFB9	0.409742	1.04305e-06	1.90805e-05	4.71941
GPBP1L1	0.447258	1.04266e-06	1.90941e-05	4.7191
CFP	0.421536	1.05066e-06	1.91987e-05	4.71673
CCDC14	0.426547	1.05692e-06	1.92919e-05	4.71463
ST3GAL4	0.443579	1.06404e-06	1.94007e-05	4.71218
MAPKAP1	0.386611	1.07407e-06	1.95623e-05	4.70858
CKS2	0.443954	1.08074e-06	1.96624e-05	4.70636
PAQR8	0.436797	1.08429e-06	1.97056e-05	4.70541
RNASEH2B	0.430959	1.0954e-06	1.98859e-05	4.70145
SEPTIN11	0.428968	1.10651e-06	2.00658e-05	4.69754
FAM207A	0.391468	1.11508e-06	2.01994e-05	4.69466
SESTD1	0.450906	1.11652e-06	2.02036e-05	4.69457
CANT1	0.459433	1.12617e-06	2.03561e-05	4.69131
SRP9	0.416517	1.1291e-06	2.03871e-05	4.69064
LMO2	0.42357	1.13162e-06	2.04107e-05	4.69014
MFSD13A	0.448495	1.1445e-06	2.06207e-05	4.6857
LTBP3	-0.433488	1.15066e-06	2.06427e-05	4.68523
MSH2	0.444773	1.15031e-06	2.06587e-05	4.6849
PPIF	0.436168	1.14999e-06	2.0675e-05	4.68455
CENPH	0.425672	1.14909e-06	2.06811e-05	4.68443
APLP2	0.413411	1.16237e-06	2.08305e-05	4.6813
AGFG2	0.436069	1.16946e-06	2.09129e-05	4.67959
PDGFC	0.44435	1.16936e-06	2.09334e-05	4.67916
MFHAS1	0.436179	1.1751e-06	2.09912e-05	4.67796
MACROD2	0.449101	1.17903e-06	2.10165e-05	4.67744
TERF1	0.424443	1.17792e-06	2.10192e-05	4.67738
DCAF11	0.411564	1.18226e-06	2.10293e-05	4.67717
CENPQ	0.441229	1.18198e-06	2.10468e-05	4.67681
SNRNP25	0.415232	1.19053e-06	2.1154e-05	4.67461
APBB1	0.441627	1.19183e-06	2.11547e-05	4.67459
H2AFZ	0.439287	1.19655e-06	2.12159e-05	4.67334
EOMES	0.412201	1.20295e-06	2.12618e-05	4.6724
GSKIP	0.450955	1.2023e-06	2.12729e-05	4.67217
UROD	0.382059	1.20213e-06	2.12923e-05	4.67178
COL19A1	0.426388	1.20648e-06	2.13017e-05	4.67159
PCYOX1L	0.434592	1.21067e-06	2.13533e-05	4.67054
PRMT3	0.428646	1.21718e-06	2.14455e-05	4.66866
DTYMK	0.432058	1.21888e-06	2.14528e-05	4.66852
MRPL21	0.476574	1.22273e-06	2.1498e-05	4.6676
CA2	0.402473	1.23393e-06	2.16721e-05	4.6641
ZCRB1	0.441312	1.2432e-06	2.18121e-05	4.6613
RNASEH2A	0.396875	1.24807e-06	2.18516e-05	4.66052
MYO10	0.428101	1.24775e-06	2.18689e-05	4.66017
CENPN	0.435469	1.25488e-06	2.19479e-05	4.65861
TGS1	0.415814	1.25815e-06	2.19593e-05	4.65838
KATNA1	0.441658	1.25804e-06	2.19803e-05	4.65797
BTG1	0.429068	1.26083e-06	2.19831e-05	4.65791
NQO1	0.449152	1.27759e-06	2.22521e-05	4.65263
XRN2	0.450639	1.2857e-06	2.23469e-05	4.65078
ARL4C	0.44684	1.2852e-06	2.23614e-05	4.6505
ARF3	0.430034	1.29302e-06	2.24508e-05	4.64877
PGLS	0.393702	1.29604e-06	2.24799e-05	4.64821
HIST1H2AH	0.423685	1.30375e-06	2.25902e-05	4.64608
IFIT2	0.441385	1.31203e-06	2.27102e-05	4.64378
PLSCR1	0.447748	1.31995e-06	2.27766e-05	4.64251
MGST1	0.429136	1.31992e-06	2.27996e-05	4.64207
BAZ1A	0.410313	1.31935e-06	2.28134e-05	4.64181
MRPL12	0.423714	1.32491e-06	2.28387e-05	4.64133
NRM	0.466256	1.33369e-06	2.29664e-05	4.63891
CDCA7L	0.414904	1.34079e-06	2.30649e-05	4.63705
KCNMA1	0.447938	1.34392e-06	2.3095e-05	4.63648
PTDSS1	0.440644	1.35976e-06	2.32955e-05	4.63273
BARD1	0.445093	1.35747e-06	2.3304e-05	4.63257
CD3G	0.417445	1.35972e-06	2.33186e-05	4.6323
LYAR	0.411356	1.36725e-06	2.33998e-05	4.63079
SSRP1	0.428204	1.37865e-06	2.35468e-05	4.62807
WASHC5	0.393549	1.37823e-06	2.35637e-05	4.62776
GEMIN4	0.449033	1.40057e-06	2.38967e-05	4.62166
ZNF486	0.438367	1.41259e-06	2.40773e-05	4.61839
HIST2H2BE	0.422706	1.4172e-06	2.41314e-05	4.61742
ACSM5	0.445528	1.43486e-06	2.44073e-05	4.61248
SNRPD1	0.380645	1.43669e-06	2.44135e-05	4.61237
FECH	0.37791	1.44159e-06	2.44472e-05	4.61177
ARRB2	0.414213	1.44598e-06	2.44472e-05	4.61177
HOOK3	0.474813	1.4447e-06	2.44503e-05	4.61172
NUDT3	0.451558	1.44781e-06	2.44535e-05	4.61166
SNCA	0.424557	1.44123e-06	2.44659e-05	4.61144
USP1	0.435868	1.44446e-06	2.4471e-05	4.61135
PACC1	0.440805	1.46521e-06	2.47225e-05	4.60691
EIF2AK1	0.414436	1.47216e-06	2.48147e-05	4.60529
P2RY13	0.424895	1.4855e-06	2.50144e-05	4.60181
RIN2	0.430248	1.49531e-06	2.5129e-05	4.59983
SMS	0.39963	1.49382e-06	2.51292e-05	4.59982
ARHGEF10L	0.433018	1.50822e-06	2.53205e-05	4.59653
ATP5F1E	0.444724	1.51001e-06	2.53252e-05	4.59645
MOB1A	0.44437	1.52565e-06	2.55619e-05	4.59241
ACBD6	0.422983	1.53286e-06	2.56571e-05	4.59079
EIF4EBP2	0.419607	1.53718e-06	2.57036e-05	4.59001
VPS33A	0.466006	1.53989e-06	2.57232e-05	4.58968
CDC42EP3	0.445418	1.55118e-06	2.5886e-05	4.58693
PTPN12	0.431384	1.55942e-06	2.59976e-05	4.58507
DYNC1LI1	0.443271	1.57268e-06	2.61926e-05	4.58182
ETNK1	0.423889	1.57426e-06	2.61928e-05	4.58182
DOK1	0.429386	1.58676e-06	2.63746e-05	4.57881
RFX5	0.45281	1.59328e-06	2.64566e-05	4.57747
NIPSNAP2	0.438265	1.60082e-06	2.65556e-05	4.57584
SDCBP	0.423687	1.60602e-06	2.66155e-05	4.57487
BNIP2	0.435532	1.60921e-06	2.66419e-05	4.57443
HEXA	0.436743	1.61641e-06	2.67346e-05	4.57293
RBMX	0.388126	1.63898e-06	2.70812e-05	4.56733
CCDC22	0.435741	1.66382e-06	2.74645e-05	4.56123
FTH1	0.424549	1.66931e-06	2.7528e-05	4.56023
PANK2	0.433837	1.67645e-06	2.76185e-05	4.5588
UBASH3B	0.432819	1.68147e-06	2.7674e-05	4.55793
POLB	0.444209	1.68363e-06	2.76824e-05	4.5578
TTC39C	0.431682	1.68735e-06	2.77163e-05	4.55726
KCTD18	0.418566	1.69252e-06	2.77467e-05	4.55679
SF3A3	0.432923	1.69214e-06	2.77678e-05	4.55646
IPO9	0.406955	1.70244e-06	2.78548e-05	4.5551
CAMKK2	0.420294	1.70192e-06	2.78735e-05	4.55481
HAUS1	0.436344	1.71695e-06	2.80373e-05	4.55226
FBXO43	0.425559	1.71545e-06	2.80402e-05	4.55222
COQ2	0.415876	1.74488e-06	2.84379e-05	4.5461
VCAN	0.411036	1.74319e-06	2.84381e-05	4.5461
UBE2S	0.409127	1.75393e-06	2.85576e-05	4.54428
IPCEF1	0.418157	1.75618e-06	2.85665e-05	4.54414
KPNA2	0.406852	1.76324e-06	2.86535e-05	4.54282
ITK	0.410278	1.77153e-06	2.87603e-05	4.54121
RAB42	0.435162	1.77419e-06	2.87755e-05	4.54098
WDR78	0.4393	1.80181e-06	2.9167e-05	4.53511
MGAM	0.417706	1.80021e-06	2.91693e-05	4.53507
NFE2	0.407443	1.8114e-06	2.9294e-05	4.53322
KIAA1841	0.434921	1.81409e-06	2.93091e-05	4.533
TNFRSF10C	0.445493	1.81672e-06	2.93232e-05	4.53279
CCP110	0.38603	1.82433e-06	2.94178e-05	4.53139
PPM1B	0.43105	1.83094e-06	2.94959e-05	4.53024
LIN7A	0.423279	1.84538e-06	2.96999e-05	4.52724
ZC3HAV1	0.432472	1.8479e-06	2.9712e-05	4.52707
CLTA	0.431317	1.86601e-06	2.99744e-05	4.52325
GNA15	0.418311	1.88102e-06	3.01864e-05	4.52019
HEATR6	0.411881	1.89437e-06	3.03716e-05	4.51753
HPRT1	0.443647	1.90898e-06	3.05766e-05	4.51461
BRCC3	0.427603	1.92351e-06	3.07798e-05	4.51173
MYBL2	0.392437	1.92884e-06	3.08356e-05	4.51095
TSBP1	-0.424908	1.93241e-06	3.08633e-05	4.51056
TSN	0.369912	1.9526e-06	3.1156e-05	4.50646
CDC6	0.416832	1.95909e-06	3.12298e-05	4.50543
RPA1	0.396763	1.96364e-06	3.12429e-05	4.50525
TP63	0.424091	1.96283e-06	3.12597e-05	4.50502
GNA13	0.425259	1.98713e-06	3.15267e-05	4.50132
SMARCA1	0.432951	1.98534e-06	3.15282e-05	4.5013
CD14	0.412146	1.99023e-06	3.15459e-05	4.50106
YWHAZ	0.43888	1.985e-06	3.15526e-05	4.50096
CSF1R	0.416387	2.01322e-06	3.173e-05	4.49853
PDSS1	0.379193	2.0116e-06	3.17344e-05	4.49847
GIT2	0.438562	2.00476e-06	3.17462e-05	4.49831
KLHL12	0.458115	2.00885e-06	3.17509e-05	4.49824
IFIT1B	0.404241	2.01127e-06	3.17591e-05	4.49813
WDR43	0.421644	2.00771e-06	3.17628e-05	4.49808
PTEN	0.443325	2.02701e-06	3.19173e-05	4.49597
RMI1	0.45574	2.04416e-06	3.21269e-05	4.49313
ME3	0.429308	2.04292e-06	3.21376e-05	4.49299
DLST	0.421498	2.05459e-06	3.22605e-05	4.49133
CASP2	0.432964	2.06089e-06	3.23291e-05	4.49041
TXN2	0.373165	2.08293e-06	3.26443e-05	4.48619
PYHIN1	0.431823	2.09146e-06	3.27474e-05	4.48482
TSPAN12	0.410338	2.09534e-06	3.27774e-05	4.48443
ZNF410	0.443302	2.10681e-06	3.29261e-05	4.48246
SKP2	0.426827	2.11644e-06	3.30457e-05	4.48089
CCL8	0.426852	2.13591e-06	3.33186e-05	4.47731
CLIP4	0.444333	2.14198e-06	3.33821e-05	4.47649
SDE2	0.417208	2.15088e-06	3.34275e-05	4.4759
RBM34	0.4483	2.14828e-06	3.34492e-05	4.47561
TMEM183A	0.419512	2.15032e-06	3.34499e-05	4.47561
ATG12	0.446746	2.15913e-06	3.35246e-05	4.47464
ATIC	0.366733	2.17804e-06	3.37868e-05	4.47125
PSMA2	0.445246	2.18232e-06	3.3822e-05	4.4708
TRMT5	0.430233	2.19872e-06	3.40446e-05	4.46795
FANCB	0.437891	2.20652e-06	3.41338e-05	4.46682
SPAST	0.381771	2.21821e-06	3.42513e-05	4.46532
EIF5A	0.448189	2.21628e-06	3.42531e-05	4.4653
ARHGEF2	0.412446	2.24491e-06	3.46316e-05	4.46053
DYNC1I2	0.463289	2.24959e-06	3.464e-05	4.46042
BCAR3	-0.418656	2.24954e-06	3.4671e-05	4.46003
CD2	0.411694	2.25972e-06	3.4732e-05	4.45927
RNF19B	0.41298	2.25773e-06	3.47333e-05	4.45925
PRCD	-0.421884	2.26922e-06	3.4846e-05	4.45785
NUP58	0.450479	2.28577e-06	3.5068e-05	4.45509
TMX1	0.426063	2.29934e-06	3.52439e-05	4.45292
VMA21	0.432809	2.31105e-06	3.5391e-05	4.45111
RCOR1	0.407602	2.31807e-06	3.5466e-05	4.45019
CCDC82	0.415627	2.32736e-06	3.55757e-05	4.44885
CDC5L	0.455221	2.34357e-06	3.57908e-05	4.44623
FLVCR2	0.424089	2.36561e-06	3.60616e-05	4.44295
DCTPP1	0.41519	2.36544e-06	3.60919e-05	4.44259
CENPW	0.413534	2.37734e-06	3.62074e-05	4.4412
USP33	0.417431	2.38476e-06	3.62873e-05	4.44025
EIF4G2	0.44389	2.42143e-06	3.68118e-05	4.43401
CNOT7	0.434901	2.42945e-06	3.69004e-05	4.43297
RBX1	0.423294	2.43335e-06	3.69261e-05	4.43267
OPTN	0.410337	2.463e-06	3.73421e-05	4.4278
C10orf62	-0.426494	2.48022e-06	3.75691e-05	4.42517
MRPL46	0.4323	2.49336e-06	3.77341e-05	4.42327
NUP205	0.428664	2.52846e-06	3.82306e-05	4.41759
PRDX1	0.439848	2.55708e-06	3.86285e-05	4.41309
AGPAT4	0.416976	2.56241e-06	3.86742e-05	4.41258
ANP32E	0.408277	2.58058e-06	3.88433e-05	4.41068
PROK2	0.415497	2.57911e-06	3.88562e-05	4.41054
OTUB1	0.445105	2.57858e-06	3.88832e-05	4.41024
PPP1CA	0.428143	2.59098e-06	3.89648e-05	4.40933
TCP1	0.384243	2.63104e-06	3.95318e-05	4.40305
DCLRE1C	0.456628	2.63443e-06	3.95471e-05	4.40289
NTAN1	0.428995	2.64011e-06	3.9597e-05	4.40234
APRT	0.408582	2.69033e-06	4.02419e-05	4.39532
UCP2	0.424771	2.68564e-06	4.02438e-05	4.3953
YWHAQ	0.419971	2.68954e-06	4.02662e-05	4.39506
GLMP	0.435414	2.69979e-06	4.03474e-05	4.39418
CD2BP2	0.400971	2.71e-06	4.04638e-05	4.39293
LRRC25	0.415577	2.73027e-06	4.07302e-05	4.39008
GTF3C3	0.397703	2.7377e-06	4.08047e-05	4.38929
PDE3B	0.416717	2.75107e-06	4.09675e-05	4.38756
GNB2	0.419025	2.77004e-06	4.12133e-05	4.38496
RFC5	0.432316	2.77673e-06	4.12761e-05	4.3843
SLCO1A2	0.406087	2.80785e-06	4.16278e-05	4.38062
CST7	0.405154	2.8061e-06	4.16387e-05	4.3805
TMC6	0.428439	2.80549e-06	4.16666e-05	4.38021
NBN	0.39732	2.82312e-06	4.17433e-05	4.37941
WDR26	0.41809	2.8208e-06	4.17458e-05	4.37939
LPL	0.431206	2.82055e-06	4.17791e-05	4.37904
KCNJ15	0.422337	2.83925e-06	4.19447e-05	4.37732
MT-ND6	-0.427191	2.8463e-06	4.20118e-05	4.37663
MAGEA9B	0.403695	2.8544e-06	4.20942e-05	4.37578
LRRC6	0.428473	2.876e-06	4.23754e-05	4.37289
STEAP4	0.416905	2.89831e-06	4.26666e-05	4.36991
PTAFR	0.406441	2.91937e-06	4.28636e-05	4.36791
MASTL	0.431758	2.91541e-06	4.28806e-05	4.36774
CX3CR1	0.410691	2.9189e-06	4.28942e-05	4.3676
ELF4	0.405828	2.92914e-06	4.29693e-05	4.36684
ORC6	0.417283	2.94442e-06	4.31179e-05	4.36534
MAGEA1	0.397117	2.94266e-06	4.31298e-05	4.36522
SELENBP1	0.40396	2.97848e-06	4.35784e-05	4.36073
PPM1D	0.406673	2.98367e-06	4.36163e-05	4.36035
TMC8	0.420431	2.99198e-06	4.36235e-05	4.36028
ELOA	0.427103	2.99029e-06	4.36369e-05	4.36015
NECAP2	0.38388	2.98907e-06	4.36572e-05	4.35994
GTSF1	0.433509	3.02035e-06	4.39988e-05	4.35656
SLC25A37	0.35869	3.04037e-06	4.4252e-05	4.35407
GRK3	0.424056	3.04601e-06	4.42955e-05	4.35364
COMMD9	0.439677	3.05152e-06	4.43371e-05	4.35323
SRSF10	0.431943	3.06794e-06	4.44985e-05	4.35165
HTRA2	0.4074	3.06646e-06	4.45155e-05	4.35149
SLC25A24	0.440684	3.07437e-06	4.45531e-05	4.35112
LCN2	0.407532	3.10562e-06	4.49671e-05	4.34711
AC104532.1	-0.414004	3.10897e-06	4.49767e-05	4.34701
IFITM3	0.407632	3.11513e-06	4.50268e-05	4.34653
CXCR2	0.408635	3.13472e-06	4.52709e-05	4.34418
FUNDC1	0.409082	3.16866e-06	4.57215e-05	4.33988
MCM3	0.386324	3.17596e-06	4.57874e-05	4.33925
GPR141	0.410182	3.18132e-06	4.58252e-05	4.3389
PLPP6	0.413302	3.19853e-06	4.59545e-05	4.33767
STK26	0.444778	3.19746e-06	4.59786e-05	4.33744
HHEX	0.419788	3.19696e-06	4.60109e-05	4.33714
KCTD3	0.413649	3.21862e-06	4.62035e-05	4.33533
AMACR	0.436009	3.22615e-06	4.62718e-05	4.33468
LTF	0.402062	3.25121e-06	4.65516e-05	4.33207
MMP9	0.410915	3.24896e-06	4.65592e-05	4.33199
ZNF85	0.422583	3.26376e-06	4.66912e-05	4.33076
E2F1	0.392061	3.28456e-06	4.69488e-05	4.32838
SMARCD2	0.434879	3.30496e-06	4.72e-05	4.32606
KIF13A	0.416749	3.31178e-06	4.72168e-05	4.3259
SLC36A1	0.395025	3.31008e-06	4.72329e-05	4.32576
TIMD4	0.430164	3.33963e-06	4.75734e-05	4.32264
HIST1H1C	0.411488	3.34648e-06	4.75899e-05	4.32249
FDFT1	0.429434	3.34541e-06	4.76152e-05	4.32225
CNST	0.420976	3.35324e-06	4.76456e-05	4.32198
PSMD14	0.399749	3.36342e-06	4.77498e-05	4.32103
HIST1H4L	0.416846	3.37163e-06	4.78257e-05	4.32034
MMD	0.450545	3.37688e-06	4.78596e-05	4.32003
SMARCAD1	0.427241	3.39037e-06	4.80101e-05	4.31867
NUP107	0.416608	3.43502e-06	4.86013e-05	4.31335
OR2W3	0.409404	3.46373e-06	4.89662e-05	4.3101
MKI67	0.378874	3.4841e-06	4.92125e-05	4.30792
IL2RB	0.395943	3.49238e-06	4.92879e-05	4.30726
PHC2	0.411417	3.53497e-06	4.98469e-05	4.30236
MRPL28	0.411755	3.58159e-06	5.04618e-05	4.29704
ABCF2	0.352636	3.60252e-06	5.07141e-05	4.29487
LILRA1	0.4089	3.61643e-06	5.08671e-05	4.29356
PKMYT1	0.395461	3.63572e-06	5.10526e-05	4.29198
SSU72	0.43195	3.63392e-06	5.10702e-05	4.29183
MYB	0.378892	3.64712e-06	5.11697e-05	4.29099
LARP4B	0.436784	3.6669e-06	5.14042e-05	4.289
AC104389.5	0.391508	3.6884e-06	5.16623e-05	4.28683
VTI1B	0.446161	3.69397e-06	5.16971e-05	4.28653
CLEC7A	0.421936	3.70249e-06	5.1773e-05	4.2859
MZT1	0.395998	3.71253e-06	5.18268e-05	4.28545
CIP2A	0.422658	3.71062e-06	5.18433e-05	4.28531
TOPBP1	0.388631	3.71742e-06	5.18518e-05	4.28524
SRPK2	0.413381	3.75018e-06	5.22652e-05	4.28179
KATNAL1	0.43496	3.76459e-06	5.23353e-05	4.28121
PECR	0.452716	3.75925e-06	5.2348e-05	4.2811
TFDP2	0.407995	3.76434e-06	5.23753e-05	4.28087
ITPRIPL1	0.43107	3.79004e-06	5.26017e-05	4.279
FYN	0.414675	3.7871e-06	5.26046e-05	4.27898
SPA17	0.416546	3.81377e-06	5.28872e-05	4.27665
CDK2AP1	0.430722	3.82054e-06	5.28935e-05	4.2766
HPS3	0.41339	3.81892e-06	5.29148e-05	4.27642
PIK3CD	0.397674	3.83547e-06	5.30563e-05	4.27526
DPH6	0.389948	3.85002e-06	5.32136e-05	4.27398
ARAP2	0.415149	3.88601e-06	5.36667e-05	4.27029
ZNF738	0.425812	3.89421e-06	5.36913e-05	4.2701
CXCL8	0.408004	3.8925e-06	5.37121e-05	4.26993
LSM1	0.410965	3.9003e-06	5.37311e-05	4.26977
CCT3	0.393236	3.92293e-06	5.39983e-05	4.26762
FOLR3	0.401967	3.93335e-06	5.40973e-05	4.26682
BORA	0.419806	3.94962e-06	5.42319e-05	4.26574
HADHB	0.442225	3.94701e-06	5.42406e-05	4.26568
KCTD10	0.422513	3.95639e-06	5.42804e-05	4.26536
RTN4IP1	0.428981	3.96475e-06	5.4306e-05	4.26515
RASGRP4	0.422436	3.96216e-06	5.43149e-05	4.26508
HBG1	0.399676	4.01614e-06	5.492e-05	4.26027
PSME1	0.43143	4.01511e-06	5.49509e-05	4.26003
DGKH	0.427481	4.02521e-06	5.49992e-05	4.25964
HIP1	0.419655	4.09296e-06	5.58792e-05	4.25275
U2AF1L5	0.44168	4.09645e-06	5.58813e-05	4.25273
FAM20B	0.399211	4.10366e-06	5.58885e-05	4.25268
FPR3	0.427887	4.1029e-06	5.59238e-05	4.2524
STK38	0.431434	4.11963e-06	5.60605e-05	4.25134
LZIC	0.410614	4.12346e-06	5.6067e-05	4.25129
GSTO1	0.407755	4.13637e-06	5.61968e-05	4.25029
NT5E	0.414474	4.16301e-06	5.6513e-05	4.24785
METTL14	0.403439	4.18216e-06	5.65436e-05	4.24762
OR1J2	-0.409626	4.18662e-06	5.65582e-05	4.2475
CINP	0.371451	4.1702e-06	5.65646e-05	4.24746
RBBP4	0.424287	4.18107e-06	5.65746e-05	4.24738
NT5C2	0.440707	4.17771e-06	5.65748e-05	4.24738
MAX	0.358936	4.17658e-06	5.66053e-05	4.24714
SPDL1	0.40308	4.20835e-06	5.68059e-05	4.24561
C19orf38	0.413739	4.22735e-06	5.70164e-05	4.244
NLRP12	0.407406	4.24172e-06	5.71641e-05	4.24288
CAP1	0.412975	4.25826e-06	5.7341e-05	4.24154
PWP1	0.352769	4.29186e-06	5.77469e-05	4.23847
ARHGAP24	0.413991	4.30509e-06	5.78784e-05	4.23748
GPR132	0.408514	4.37189e-06	5.84479e-05	4.23323
PSMC1	0.419932	4.37171e-06	5.84922e-05	4.2329
DRAP1	0.395505	4.36946e-06	5.85088e-05	4.23278
PGAM1	0.407842	4.36842e-06	5.85417e-05	4.23253
PRIM1	0.412925	4.36728e-06	5.85733e-05	4.2323
MRPL51	0.419652	4.36422e-06	5.85793e-05	4.23226
VAPA	0.437938	4.36413e-06	5.86251e-05	4.23192
ADIPOR1	0.364816	4.39056e-06	5.86506e-05	4.23173
HSBP1	0.420417	4.39566e-06	5.8672e-05	4.23157
CPM	0.405047	4.40833e-06	5.87942e-05	4.23067
TMEM267	0.410544	4.44085e-06	5.91807e-05	4.22782
SUSD1	0.406483	4.44751e-06	5.92223e-05	4.22751
KPNA1	0.408727	4.49217e-06	5.97219e-05	4.22387
RAC1	0.417648	4.49211e-06	5.97686e-05	4.22353
AL136454.1	0.401592	4.53271e-06	6.02131e-05	4.22031
SHOC2	0.433511	4.6048e-06	6.11223e-05	4.2138
HTATSF1	0.390639	4.62423e-06	6.13315e-05	4.21232
TMEM106C	0.445763	4.63575e-06	6.13871e-05	4.21192
LNX1	0.403004	4.63425e-06	6.14157e-05	4.21172
CCT4	0.415372	4.64164e-06	6.14164e-05	4.21172
NUP93	0.416818	4.65732e-06	6.15753e-05	4.21059
CISD3	0.42992	4.66271e-06	6.15978e-05	4.21044
FPR2	0.419545	4.68943e-06	6.18532e-05	4.20864
PUS10	0.412791	4.6861e-06	6.1858e-05	4.2086
DEFA1	0.376035	4.72272e-06	6.21942e-05	4.20625
SEPHS2	0.44461	4.71956e-06	6.22015e-05	4.2062
HGSNAT	0.410358	4.75164e-06	6.25259e-05	4.20394
FLNA	0.403908	4.78152e-06	6.28697e-05	4.20156
LRRC47	0.417517	4.79705e-06	6.30243e-05	4.20049
DYSF	0.404212	4.82574e-06	6.33515e-05	4.19824
ABCC5	0.406171	4.83571e-06	6.34327e-05	4.19769
TMEM241	0.427844	4.86308e-06	6.37418e-05	4.19558
TBC1D14	0.425074	4.87161e-06	6.38036e-05	4.19515
C17orf80	0.438653	4.89143e-06	6.38633e-05	4.19475
VCAM1	0.41825	4.89052e-06	6.39012e-05	4.19449
FGL2	0.40601	4.89948e-06	6.39186e-05	4.19437
BTBD1	0.417902	4.90476e-06	6.39376e-05	4.19424
LIN9	0.420551	4.89031e-06	6.39485e-05	4.19417
ABCB7	0.357722	4.90947e-06	6.39492e-05	4.19416
ARF5	0.390044	4.91647e-06	6.39906e-05	4.19388
TSPAN2	0.408632	4.8902e-06	6.39971e-05	4.19384
C5orf30	0.419865	4.96409e-06	6.45601e-05	4.19004
TM2D2	0.372229	4.99386e-06	6.48466e-05	4.18811
CSE1L	0.420141	4.9915e-06	6.48663e-05	4.18798
NEMP1	0.430285	5.00986e-06	6.49536e-05	4.1874
CLEC4D	0.404396	5.00783e-06	6.49775e-05	4.18724
VAMP7	0.407357	5.0234e-06	6.50786e-05	4.18656
PHTF2	0.435754	5.1307e-06	6.64173e-05	4.17772
MEI1	-0.374393	5.19537e-06	6.72025e-05	4.17261
ATP10A	0.411974	5.20428e-06	6.72658e-05	4.17221
SH2D1A	0.40473	5.22384e-06	6.74665e-05	4.17091
RNF138	0.430645	5.24237e-06	6.76537e-05	4.16971
CD300LF	0.399697	5.29398e-06	6.82145e-05	4.16612
PUF60	0.411694	5.29272e-06	6.82508e-05	4.16589
DHX36	0.424019	5.3147e-06	6.84288e-05	4.16476
POTEE	0.398522	5.31954e-06	6.84385e-05	4.1647
SLC27A2	0.413291	5.35184e-06	6.88012e-05	4.1624
AKT1	0.407595	5.36987e-06	6.898e-05	4.16128
DDX20	0.428871	5.41404e-06	6.9494e-05	4.15805
ATP6V1A	0.38395	5.42424e-06	6.95715e-05	4.15757
ZNF655	0.413393	5.44476e-06	6.97814e-05	4.15626
RIOX1	0.419754	5.47088e-06	7.00624e-05	4.15451
KLRC4-KLRK1	0.396966	5.48055e-06	7.01327e-05	4.15408
MRPL11	0.390921	5.49042e-06	7.01517e-05	4.15396
SLAMF8	0.410303	5.48649e-06	7.0155e-05	4.15394
DIS3	0.393355	5.49901e-06	7.02078e-05	4.15361
THOC5	0.406411	5.5287e-06	7.0533e-05	4.15161
CARNMT1	0.429074	5.5581e-06	7.08003e-05	4.14997
SRGN	0.407142	5.55602e-06	7.08276e-05	4.1498
AP2S1	0.429679	5.567e-06	7.08597e-05	4.1496
ERI2	0.399463	5.58581e-06	7.09911e-05	4.1488
WRNIP1	0.399141	5.58417e-06	7.10242e-05	4.14859
NDUFB2	0.381984	5.59892e-06	7.11037e-05	4.14811
MBOAT2	0.407724	5.60604e-06	7.11401e-05	4.14789
AKR1C3	0.403066	5.61504e-06	7.12004e-05	4.14752
DNAJC13	0.416172	5.62533e-06	7.12769e-05	4.14705
WDR12	0.418115	5.63537e-06	7.13501e-05	4.14661
ABI3	0.414324	5.69884e-06	7.18818e-05	4.14338
MCMBP	0.401023	5.68637e-06	7.1887e-05	4.14335
HIST1H2AK	0.390247	5.6965e-06	7.19064e-05	4.14323
DHCR24	0.404438	5.68541e-06	7.19293e-05	4.14309
PDE7A	0.411212	5.69523e-06	7.19448e-05	4.143
RRP15	0.394103	5.72526e-06	7.21064e-05	4.14203
GBE1	0.428795	5.72265e-06	7.21278e-05	4.1419
ZNF585B	0.414605	5.74497e-06	7.22459e-05	4.14119
YWHAB	0.410728	5.74481e-06	7.22982e-05	4.14087
FBN2	0.394583	5.77388e-06	7.2555e-05	4.13933
DCLRE1A	0.402019	5.79449e-06	7.27048e-05	4.13844
CIAPIN1	0.413075	5.79914e-06	7.27086e-05	4.13841
CCIN	0.398458	5.80359e-06	7.27099e-05	4.13841
FPGT	0.398651	5.79246e-06	7.27338e-05	4.13826
SHH	-0.397578	5.82823e-06	7.2964e-05	4.13689
NUP50	0.414052	5.83261e-06	7.29642e-05	4.13689
AC005833.1	0.423562	5.89127e-06	7.36431e-05	4.13287
LRCH1	0.411833	5.90358e-06	7.37419e-05	4.13229
ADGRE1	0.394764	5.93974e-06	7.41382e-05	4.12996
GDI2	0.405941	5.94893e-06	7.41424e-05	4.12993
COPA	0.413352	5.94674e-06	7.41703e-05	4.12977
RCC2	0.396072	5.95689e-06	7.41863e-05	4.12968
CCDC141	0.41252	5.9638e-06	7.42171e-05	4.1295
UMPS	0.404743	6.01827e-06	7.47838e-05	4.12619
NDUFS6	0.364003	6.02359e-06	7.47944e-05	4.12613
OSBPL8	0.355743	6.01507e-06	7.47996e-05	4.1261
PARP1	0.415015	6.02985e-06	7.48167e-05	4.126
UTP25	0.422204	6.05307e-06	7.49381e-05	4.1253
GCLM	0.39921	6.05056e-06	7.49624e-05	4.12516
CAND1	0.424424	6.0486e-06	7.49937e-05	4.12498
ZNF93	0.42063	6.07162e-06	7.51121e-05	4.12429
DIP2B	0.405823	6.07848e-06	7.51415e-05	4.12412
NUP133	0.399802	6.08612e-06	7.51804e-05	4.1239
POLD3	0.394673	6.10415e-06	7.5292e-05	4.12325
TTF1	0.40691	6.10374e-06	7.53424e-05	4.12296
TPI1	0.398425	6.13429e-06	7.55524e-05	4.12175
GYPA	0.398172	6.13382e-06	7.56023e-05	4.12147
ITGB3BP	0.415316	6.1605e-06	7.58194e-05	4.12022
MRS2	0.408028	6.23298e-06	7.64866e-05	4.11641
LST1	0.399542	6.23072e-06	7.65149e-05	4.11625
GABARAPL2	0.404771	6.22897e-06	7.65496e-05	4.11606
PPIA	0.405271	6.22577e-06	7.65665e-05	4.11596
PIH1D1	0.41128	6.25309e-06	7.66771e-05	4.11533
MAD2L1	0.39896	6.2717e-06	7.67366e-05	4.115
COMMD6	0.419531	6.27728e-06	7.67488e-05	4.11493
PEX2	0.412173	6.2641e-06	7.67558e-05	4.11489
SASH1	0.422533	6.27094e-06	7.67835e-05	4.11473
JAKMIP1	0.407887	6.3161e-06	7.7167e-05	4.11257
USP14	0.405083	6.33807e-06	7.7379e-05	4.11138
PRPS2	0.411097	6.34399e-06	7.73948e-05	4.11129
RALBP1	0.417176	6.34963e-06	7.74072e-05	4.11122
LILRA5	0.393125	6.39562e-06	7.79112e-05	4.1084
GMCL1	0.385486	6.4301e-06	7.82742e-05	4.10638
LAMTOR5	0.398427	6.47834e-06	7.87469e-05	4.10377
CPSF2	0.411434	6.47491e-06	7.87624e-05	4.10368
CXCL1	0.404426	6.5241e-06	7.92455e-05	4.10103
MYL6	0.389833	6.55705e-06	7.9588e-05	4.09915
ARHGAP11B	0.403029	6.58149e-06	7.98267e-05	4.09785
ARPIN-AP3S2	0.417587	6.58803e-06	7.98483e-05	4.09773
HSPB11	0.410397	6.62525e-06	8.02413e-05	4.0956
NEDD8	0.389942	6.66765e-06	8.06964e-05	4.09315
CCL23	0.384926	6.67282e-06	8.07007e-05	4.09312
MAP3K7	0.390661	6.67956e-06	8.07238e-05	4.093
SLC4A7	0.40258	6.70422e-06	8.09634e-05	4.09171
PGK1	0.407073	6.73389e-06	8.1263e-05	4.09011
MMS19	0.402855	6.75654e-06	8.14776e-05	4.08896
PKLR	0.3799	6.7803e-06	8.17053e-05	4.08775
MT-ND5	-0.410887	6.79052e-06	8.17695e-05	4.08741
BABAM1	0.412383	6.80355e-06	8.18675e-05	4.08689
PPP2R3C	0.416032	6.83095e-06	8.21382e-05	4.08545
OSGIN2	0.40915	6.83878e-06	8.21734e-05	4.08527
ENC1	0.406503	6.85876e-06	8.23543e-05	4.08431
SLC25A3	0.409865	6.8643e-06	8.23618e-05	4.08427
NIBAN1	0.411214	6.89076e-06	8.25018e-05	4.08354
EIF3H	0.406479	6.88963e-06	8.25473e-05	4.0833
NARS	0.413818	6.90233e-06	8.25813e-05	4.08312
CTAG1A	0.38995	6.88905e-06	8.25995e-05	4.08302
COPS5	0.408675	7.00229e-06	8.37174e-05	4.07718
MAGEB16	0.388016	7.03511e-06	8.40498e-05	4.07546
CHAF1B	0.407243	7.04347e-06	8.40896e-05	4.07526
AP4B1	0.402781	7.05677e-06	8.41284e-05	4.07506
GNG2	0.422439	7.06432e-06	8.41584e-05	4.0749
PEMT	0.417415	7.07451e-06	8.41601e-05	4.07489
DACT1	0.405741	7.05472e-06	8.41638e-05	4.07487
MZT2B	0.418194	7.0717e-06	8.41864e-05	4.07476
ETV3	0.41431	7.09544e-06	8.43491e-05	4.07392
HMGXB4	0.420542	7.11469e-06	8.45179e-05	4.07305
PDHX	0.371047	7.12604e-06	8.45926e-05	4.07267
NADK	0.395151	7.14432e-06	8.47496e-05	4.07186
PPP4R2	0.41693	7.15829e-06	8.48551e-05	4.07132
HDAC1	0.400192	7.17451e-06	8.49872e-05	4.07065
MBOAT1	0.386775	7.22081e-06	8.54751e-05	4.06816
H2AFV	0.417764	7.34829e-06	8.69228e-05	4.06087
ELF1	0.420085	7.35419e-06	8.69311e-05	4.06082
PSMB6	0.41208	7.40946e-06	8.75227e-05	4.05788
LAIR1	0.399084	7.42725e-06	8.76091e-05	4.05745
SUCLA2	0.440843	7.42506e-06	8.76451e-05	4.05727
CXCL9	0.401168	7.43603e-06	8.76509e-05	4.05724
RPA3	0.408844	7.45643e-06	8.78295e-05	4.05636
EIF3M	0.411837	7.59099e-06	8.93516e-05	4.0489
CD8B	0.396707	7.61022e-06	8.94521e-05	4.04841
GUF1	0.438001	7.60789e-06	8.94876e-05	4.04824
AFG3L2	0.395047	7.6636e-06	9.00164e-05	4.04568
NHSL2	0.395374	7.67e-06	9.00284e-05	4.04562
SH2D2A	0.404146	7.68201e-06	9.01062e-05	4.04525
OSTF1	0.371441	7.69606e-06	9.02078e-05	4.04476
CDC7	0.404302	7.83115e-06	9.17269e-05	4.0375
FAH	0.381726	7.85073e-06	9.18919e-05	4.03672
RSU1	0.391492	7.89106e-06	9.22995e-05	4.0348
SAV1	0.404925	7.92492e-06	9.26308e-05	4.03324
CWC22	0.397222	7.93278e-06	9.26579e-05	4.03312
GNAI3	0.409006	7.95108e-06	9.2807e-05	4.03242
LYST	0.380361	7.96331e-06	9.28849e-05	4.03205
FMO5	0.411665	7.98292e-06	9.30488e-05	4.03129
MICU1	0.400398	8.00471e-06	9.32379e-05	4.03041
RIN3	0.389039	8.01229e-06	9.32613e-05	4.0303
FAM117B	0.42269	8.0308e-06	9.33469e-05	4.0299
EBPL	0.39367	8.0267e-06	9.33641e-05	4.02982
DACH1	0.399767	8.04969e-06	9.35016e-05	4.02918
SAC3D1	0.424888	8.08398e-06	9.38347e-05	4.02764
ADD3	0.413869	8.11391e-06	9.41168e-05	4.02633
OSBPL11	0.387519	8.22903e-06	9.53861e-05	4.02051
CPSF6	0.394589	8.27631e-06	9.58014e-05	4.01863
PRUNE2	0.417249	8.27323e-06	9.58321e-05	4.01849
APOE	0.398746	8.28884e-06	9.58801e-05	4.01827
GLT1D1	0.393914	8.31677e-06	9.5938e-05	4.01801
CCHCR1	0.384192	8.30871e-06	9.59773e-05	4.01783
GET3	0.414539	8.30369e-06	9.59856e-05	4.01779
RO60	0.419104	8.31621e-06	9.59977e-05	4.01774
TSPAN15	0.407379	8.33119e-06	9.60382e-05	4.01756
COX16	0.41397	8.41828e-06	9.69753e-05	4.01334
MFSD1	0.407765	8.4504e-06	9.72784e-05	4.01198
TRIP4	0.404306	8.46243e-06	9.735e-05	4.01166
TTC13	0.432047	8.49368e-06	9.76423e-05	4.01036
SMC2	0.406259	8.51582e-06	9.78296e-05	4.00953
ZNF285	0.401363	8.60455e-06	9.87135e-05	4.00562
FBXO7	0.366787	8.60363e-06	9.87707e-05	4.00537
SMARCE1	0.403171	8.63779e-06	9.9027e-05	4.00425
GALE	0.39695	8.66174e-06	9.92335e-05	4.00334
ELANE	0.374634	8.68039e-06	9.93792e-05	4.0027
AHR	0.409798	8.73641e-06	9.98839e-05	4.0005
TMSB10	0.400163	8.73067e-06	9.98865e-05	4.00049
SLC9A9	0.392741	8.74522e-06	9.99163e-05	4.00036
FAM178B	0.370992	8.78772e-06	0.000100333	3.99855
CLN8	0.409933	8.84619e-06	0.000100932	3.99597
PTGES3	0.396295	8.89979e-06	0.000101405	3.99394
SBNO1	0.410586	8.89764e-06	0.00010145	3.99375
TAX1BP3	0.428407	8.93202e-06	0.000101634	3.99296
ARHGEF39	0.393538	8.92621e-06	0.000101637	3.99295
TAX1BP1	0.419821	9.0263e-06	0.000102637	3.98869
CD52	0.383017	9.03366e-06	0.000102651	3.98864
ISCA2	0.387928	9.1225e-06	0.000103591	3.98468
SLC27A3	0.402905	9.14288e-06	0.000103752	3.98401
RCHY1	0.396663	9.1649e-06	0.000103931	3.98325
POP5	0.332133	9.17591e-06	0.000103985	3.98303
SYNJ1	0.379759	9.21686e-06	0.000104379	3.98139
CBX5	0.394143	9.26283e-06	0.000104828	3.97952
DICER1	0.402938	9.334e-06	0.000105562	3.97649
CDKN3	0.386267	9.36574e-06	0.00010585	3.97531
NUDT15	0.405384	9.40467e-06	0.000106075	3.97439
CYB561A3	0.366579	9.39965e-06	0.00010609	3.97433
NDE1	0.386485	9.39461e-06	0.000106105	3.97427
RNF125	0.388296	9.47238e-06	0.000106767	3.97156
KBTBD6	0.424967	9.48007e-06	0.000106782	3.9715
PPT1	0.405428	9.57137e-06	0.000107665	3.96793
DLD	0.404444	9.56941e-06	0.000107715	3.96772
TBC1D7	0.40131	9.65019e-06	0.000108479	3.96466
ESD	0.403866	9.68285e-06	0.000108773	3.96348
SLC6A6	0.386435	9.83223e-06	0.000110377	3.95712
PHACTR2	0.400368	9.91123e-06	0.000111189	3.95394
CCL4L2	0.419321	9.9262e-06	0.000111283	3.95357
MAP2K1	0.41383	9.93332e-06	0.000111288	3.95355
RPRD1A	0.366036	1.01277e-05	0.000113389	3.94543
UBE2L6	0.414544	1.01518e-05	0.000113584	3.94468
R3HDM4	0.39571	1.01784e-05	0.000113729	3.94413
RAC2	0.399345	1.01721e-05	0.000113735	3.94411
KCTD9	0.421689	1.01967e-05	0.000113857	3.94364
CYBRD1	0.403061	1.0204e-05	0.000113863	3.94362
NONO	0.410742	1.02201e-05	0.000113967	3.94322
PNRC1	0.41053	1.02317e-05	0.00011402	3.94302
CEP78	0.376836	1.02599e-05	0.000114258	3.94211
RAD54L	0.373978	1.02972e-05	0.000114597	3.94083
RITA1	0.394078	1.03602e-05	0.000114917	3.93962
SOD1	0.384795	1.03345e-05	0.000114937	3.93954
ARL6IP5	0.420937	1.03489e-05	0.000114943	3.93952
FAM81A	0.387692	1.03591e-05	0.000114981	3.93937
CTNNAL1	0.395829	1.03461e-05	0.000114989	3.93935
PEX19	0.36076	1.04259e-05	0.000115568	3.93716
CREG1	0.417308	1.04407e-05	0.00011558	3.93712
C11orf74	0.399034	1.04343e-05	0.000115585	3.9371
OSCAR	0.390079	1.04783e-05	0.000115919	3.93585
LEF1	0.410873	1.06398e-05	0.000117628	3.92949
FAM71A	-0.38477	1.0661e-05	0.000117784	3.92891
MPP7	0.396133	1.06913e-05	0.000118041	3.92797
GK	0.422408	1.07125e-05	0.000118198	3.92739
SNX2	0.396019	1.07305e-05	0.000118318	3.92695
BCL2L13	0.357543	1.07446e-05	0.000118396	3.92666
FLOT1	0.380649	1.07742e-05	0.000118644	3.92575
DNMT3B	0.390261	1.07823e-05	0.000118655	3.92571
FCAR	0.380167	1.08362e-05	0.00011917	3.92383
PDCD6IP	0.369334	1.0858e-05	0.000119253	3.92353
KIAA0100	0.40774	1.08525e-05	0.000119271	3.92347
DNPH1	0.402723	1.08872e-05	0.000119495	3.92265
WBP4	0.390613	1.09821e-05	0.000120458	3.91916
MCUR1	0.401763	1.10163e-05	0.000120675	3.91838
SRD5A1	0.401006	1.10106e-05	0.000120691	3.91833
PKD2L1	0.393943	1.11208e-05	0.000121739	3.91457
GYG1	0.382526	1.11307e-05	0.000121768	3.91447
HECW2	0.394613	1.1192e-05	0.00012212	3.91321
ADGRL3	0.380128	1.11894e-05	0.000122171	3.91303
ATP8B4	0.386713	1.11882e-05	0.000122238	3.91279
IKZF1	0.390333	1.11872e-05	0.000122306	3.91255
HAUS4	0.376127	1.12897e-05	0.000123106	3.90972
HPF1	0.415138	1.13242e-05	0.000123401	3.90868
HPGDS	0.393229	1.13807e-05	0.000123856	3.90708
LRRC58	0.386802	1.13748e-05	0.000123872	3.90703
POGK	0.410605	1.13979e-05	0.000123882	3.90699
PDE9A	0.397334	1.13959e-05	0.000123941	3.90679
NXT2	0.402494	1.1442e-05	0.00012428	3.9056
IL2RA	0.382176	1.14844e-05	0.00012466	3.90427
GRB10	0.385916	1.15423e-05	0.000125208	3.90237
EIF2S1	0.34888	1.15595e-05	0.000125231	3.90229
PAIP2	0.381096	1.15537e-05	0.00012525	3.90222
SDHB	0.404256	1.15757e-05	0.000125326	3.90196
MS4A3	0.380374	1.15842e-05	0.000125337	3.90192
CTSB	0.393408	1.16379e-05	0.000125836	3.90019
ENOPH1	0.356954	1.16564e-05	0.000125956	3.89978
PRF1	0.374591	1.17239e-05	0.000126522	3.89784
TNFRSF11A	0.40003	1.17217e-05	0.00012658	3.89764
KIF7	0.390678	1.17671e-05	0.000126906	3.89652
MRPL17	0.39909	1.17784e-05	0.000126945	3.89638
CDKN2C	0.402623	1.17895e-05	0.000126984	3.89625
C11orf98	0.409919	1.18681e-05	0.000127749	3.89364
NRP1	0.390128	1.19062e-05	0.000128076	3.89253
C1QBP	0.398559	1.19581e-05	0.000128552	3.89092
BEST1	0.384837	1.19751e-05	0.000128652	3.89059
POU2F2	-0.381203	1.19914e-05	0.000128744	3.89027
ANXA11	0.395007	1.20333e-05	0.000129111	3.88904
KIAA0232	0.381465	1.21157e-05	0.000129912	3.88635
XRCC3	0.365177	1.21848e-05	0.000130569	3.88416
ROPN1L	0.385669	1.22576e-05	0.000131266	3.88185
VPS41	0.347223	1.2321e-05	0.00013186	3.87989
FOLR2	0.406899	1.23436e-05	0.000131933	3.87965
PPID	0.389834	1.2339e-05	0.000131969	3.87953
LEPROTL1	0.394921	1.24613e-05	0.000133106	3.8758
GINS1	0.402327	1.25062e-05	0.0001335	3.87452
PADI2	0.379172	1.2548e-05	0.000133861	3.87335
MRPL44	0.399073	1.25831e-05	0.000134065	3.87268
GUCY1B1	0.385429	1.25829e-05	0.000134148	3.87242
TRIM14	0.379285	1.26793e-05	0.000135004	3.86965
MRPL24	0.360855	1.27924e-05	0.000136122	3.86607
LYPLA1	0.393223	1.28262e-05	0.000136395	3.8652
RABIF	0.408343	1.29008e-05	0.000137101	3.86296
BCAS4	0.387374	1.29167e-05	0.000137183	3.8627
TRAIP	0.37049	1.29723e-05	0.000137599	3.86139
FAM92A	0.409076	1.29654e-05	0.000137612	3.86134
PAPOLA	0.401378	1.29829e-05	0.000137623	3.86131
FHL2	0.379534	1.30059e-05	0.000137781	3.86081
SELENOI	0.402985	1.30761e-05	0.000138436	3.85875
MRPL52	0.383127	1.3158e-05	0.000139215	3.85631
KIAA1586	0.388511	1.31997e-05	0.00013948	3.85549
POLR3K	0.40249	1.31966e-05	0.000139535	3.85532
FBXO33	0.409561	1.3215e-05	0.000139554	3.85526
ATP6V0E2	0.396649	1.3226e-05	0.000139582	3.85517
ZSCAN32	0.428971	1.32477e-05	0.000139722	3.85473
CHMP3	0.402639	1.32732e-05	0.000139904	3.85417
BTBD8	0.404042	1.32979e-05	0.000140075	3.85364
ATP5IF1	0.372564	1.33399e-05	0.00014043	3.85254
SEC11A	0.40958	1.33613e-05	0.000140566	3.85212
MRPL37	0.421572	1.33769e-05	0.000140642	3.85188
ATAD2B	0.373533	1.34018e-05	0.000140816	3.85135
CLC	0.372109	1.34763e-05	0.000141509	3.84922
UBE3A	0.413178	1.35179e-05	0.000141768	3.84842
ARNTL2	0.392541	1.35121e-05	0.000141797	3.84833
UCHL3	0.419636	1.35567e-05	0.000142086	3.84745
SOWAHD	0.378813	1.35836e-05	0.000142279	3.84686
IFI44L	0.394289	1.36061e-05	0.000142426	3.84641
NUDT19	0.398626	1.36247e-05	0.000142531	3.84609
RBM4	0.403943	1.36383e-05	0.000142585	3.84593
G2E3	0.397503	1.36569e-05	0.00014269	3.84561
HIST1H4B	0.344114	1.36769e-05	0.00014281	3.84524
PTMA	0.378597	1.37158e-05	0.000143126	3.84428
SAP30	0.377781	1.37516e-05	0.000143411	3.84342
SNRPE	0.405616	1.38246e-05	0.000144082	3.84139
CYP2S1	0.380855	1.38675e-05	0.000144439	3.84032
UQCRC2	0.379859	1.40304e-05	0.000146045	3.83551
ICA1L	0.392904	1.408e-05	0.00014647	3.83425
HADHA	0.388629	1.41173e-05	0.000146767	3.83337
FCGR1B	0.384736	1.41387e-05	0.000146899	3.83298
DHX9	0.39972	1.42459e-05	0.000147738	3.83051
VDAC3	0.400616	1.42435e-05	0.000147804	3.83031
ZNF516	0.383974	1.42366e-05	0.000147824	3.83026
COA3	0.400969	1.4341e-05	0.000148631	3.82789
ANXA4	0.390178	1.43643e-05	0.000148781	3.82745
DDX50	0.356415	1.44221e-05	0.000149287	3.82598
CD86	0.397694	1.45387e-05	0.000150309	3.82302
LDHB	0.385425	1.453e-05	0.000150311	3.82301
PCDHGB6	-0.36864	1.4578e-05	0.000150622	3.82211
DNAJA2	0.350837	1.46587e-05	0.000151362	3.81998
ASAH1	0.33956	1.4822e-05	0.000152953	3.81544
RPS7	0.383021	1.48392e-05	0.000153036	3.81521
PALB2	0.386301	1.49936e-05	0.000154534	3.81098
IL1R1	0.39379	1.50281e-05	0.000154699	3.81051
ENY2	0.424154	1.50253e-05	0.000154766	3.81033
CARHSP1	0.352415	1.50557e-05	0.000154888	3.80998
ANAPC1	0.383212	1.51157e-05	0.000155409	3.80852
MAD2L2	0.38988	1.5144e-05	0.000155604	3.80798
S100A6	0.380519	1.51951e-05	0.000156035	3.80678
GNPDA1	0.413474	1.52321e-05	0.000156318	3.80599
TTL	0.388577	1.53807e-05	0.000157746	3.80204
VMP1	0.37186	1.54058e-05	0.000157907	3.8016
ECHS1	0.372682	1.54758e-05	0.000158334	3.80043
PCDHGA11	-0.351219	1.54612e-05	0.000158378	3.80031
SRSF2	0.385954	1.54901e-05	0.000158383	3.80029
CAMK4	0.390327	1.54755e-05	0.000158427	3.80017
LDHA	0.352867	1.56249e-05	0.000159664	3.79679
CHMP1B	0.389268	1.56548e-05	0.000159872	3.79623
SZRD1	0.386934	1.5681e-05	0.000160041	3.79577
IFI35	0.322303	1.58057e-05	0.00016102	3.79312
SERPINH1	0.385732	1.58029e-05	0.000161089	3.79293
SCML4	0.384914	1.57939e-05	0.000161096	3.79292
RPL31	0.386205	1.58297e-05	0.000161167	3.79272
FIGNL1	0.388178	1.59321e-05	0.000162012	3.79045
TLR5	0.391499	1.59227e-05	0.000162015	3.79044
PRKAR1B	0.377241	1.59967e-05	0.00016257	3.78896
SLFN12	0.424585	1.60093e-05	0.000162599	3.78888
ZNF131	0.414666	1.60778e-05	0.000163196	3.78729
GPATCH3	0.364881	1.61e-05	0.000163322	3.78695
PIMREG	0.386048	1.61682e-05	0.000163915	3.78538
ADORA3	0.382	1.62322e-05	0.000164464	3.78393
SEMA3A	0.389795	1.63567e-05	0.000165626	3.78087
REXO5	0.383308	1.64209e-05	0.000166174	3.77944
SLC25A40	0.410232	1.6636e-05	0.00016825	3.77404
HAUS3	0.395983	1.66587e-05	0.000168378	3.77371
NR6A1	0.394109	1.67212e-05	0.000168908	3.77235
RALA	0.412783	1.70248e-05	0.000171767	3.76506
PXMP2	0.400363	1.70353e-05	0.000171769	3.76505
PDK4	0.397351	1.70175e-05	0.000171796	3.76499
PMAIP1	0.399175	1.70902e-05	0.000172219	3.76392
ILF2	0.381548	1.71448e-05	0.000172665	3.7628
IARS2	0.390369	1.71961e-05	0.000173078	3.76176
TFEC	0.396627	1.72878e-05	0.000173896	3.75971
OAS1	0.389804	1.73548e-05	0.000174465	3.75829
HS1BP3	0.406881	1.73706e-05	0.000174519	3.75816
CLEC17A	0.37492	1.74046e-05	0.000174651	3.75783
STAM	0.361902	1.73967e-05	0.000174677	3.75776
AOAH	0.371507	1.75022e-05	0.000175526	3.75566
LRPPRC	0.39055	1.75221e-05	0.00017562	3.75543
HSD17B14	0.393545	1.76524e-05	0.00017682	3.75247
TMEM199	0.361108	1.77135e-05	0.000177326	3.75123
FABP3	0.394526	1.77359e-05	0.000177444	3.75094
NIT1	0.404958	1.78007e-05	0.000177986	3.74962
MAK16	0.364558	1.78325e-05	0.000178091	3.74936
PDZD8	0.369811	1.78235e-05	0.000178107	3.74932
ANO7	-0.379431	1.79796e-05	0.000179453	3.74605
PATZ1	0.406658	1.81614e-05	0.000181159	3.74194
SLF1	0.385746	1.81805e-05	0.000181242	3.74174
CTNNBL1	0.348904	1.82255e-05	0.000181583	3.74093
CLEC2B	0.390508	1.82865e-05	0.000182082	3.73973
BLZF1	0.394539	1.8423e-05	0.000183332	3.73676
LGALS9	0.384878	1.84636e-05	0.000183518	3.73632
GIMAP1-GIMAP5	0.375653	1.84596e-05	0.000183587	3.73616
MAIP1	0.405672	1.85165e-05	0.000183934	3.73534
IBTK	0.399951	1.86138e-05	0.000184791	3.73332
KLRC1	0.365106	1.86541e-05	0.000185081	3.73264
SLC12A7	0.379615	1.87032e-05	0.000185458	3.73175
PPTC7	0.4022	1.87649e-05	0.000185961	3.73058
BACE1	0.387677	1.87916e-05	0.000186114	3.73022
DMC1	0.397157	1.88431e-05	0.000186404	3.72954
RAB11A	0.401217	1.88347e-05	0.000186432	3.72948
PSMC5	0.38919	1.91057e-05	0.000188779	3.72405
UBE2J2	0.371709	1.91034e-05	0.000188867	3.72384
GAS7	0.365907	1.91344e-05	0.000188951	3.72365
MATK	0.372696	1.92296e-05	0.000189555	3.72226
MGLL	0.369125	1.9207e-05	0.000189556	3.72226
NDUFB7	0.407437	1.92474e-05	0.000189619	3.72212
CHKA	0.388813	1.92265e-05	0.000189636	3.72208
OR6A2	-0.374535	1.92606e-05	0.000189638	3.72208
RRAGC	0.387631	1.92947e-05	0.000189638	3.72207
CLTC	0.397337	1.92871e-05	0.000189676	3.72199
TMTC1	0.389086	1.92846e-05	0.000189762	3.72179
NUP160	0.353761	1.93455e-05	0.000189915	3.72144
SRSF3	0.331291	1.93351e-05	0.000189924	3.72142
CETP	0.391192	1.94152e-05	0.000190376	3.72039
SNRPB	0.37183	1.94119e-05	0.000190455	3.72021
MEFV	0.363481	1.94432e-05	0.000190539	3.72002
SLC37A4	0.355111	1.94668e-05	0.000190659	3.71974
TOGARAM2	0.379637	1.9498e-05	0.000190853	3.7193
ATP1B3	0.392218	1.95145e-05	0.000190902	3.71919
CEP170	0.387571	1.95503e-05	0.000191141	3.71865
SVEP1	0.38654	1.95929e-05	0.000191445	3.71796
CCDC15	0.404641	1.96573e-05	0.000191963	3.71678
RAB3GAP2	0.37082	1.97003e-05	0.00019227	3.71609
UBR7	0.426496	1.98584e-05	0.000193701	3.71287
APAF1	0.361476	1.98731e-05	0.000193731	3.7128
MYBPC2	0.384422	1.99729e-05	0.00019459	3.71088
PACSIN2	0.37163	2.00368e-05	0.000195099	3.70974
GAGE1	0.36886	2.00853e-05	0.000195458	3.70895
NPTN	0.386748	2.01379e-05	0.000195856	3.70806
CORO7-PAM16	0.37892	2.02039e-05	0.000196384	3.70689
GSDMA	0.371795	2.02513e-05	0.00019673	3.70613
RNMT	0.372031	2.02751e-05	0.000196847	3.70587
RHEB	0.385463	2.03892e-05	0.00019784	3.70369
GLUD2	0.414581	2.04087e-05	0.000197915	3.70352
PROS1	0.37956	2.0429e-05	0.000197996	3.70334
RUNX2	0.39969	2.0516e-05	0.000198725	3.70175
COMMD7	0.372763	2.05466e-05	0.000198907	3.70135
KLRD1	0.375917	2.05664e-05	0.000198983	3.70118
GRSF1	0.370768	2.07296e-05	0.000200446	3.698
VPS72	0.349019	2.09781e-05	0.000202732	3.69308
ARRDC3	0.3911	2.09986e-05	0.000202813	3.6929
IDH3B	0.38203	2.11111e-05	0.000203782	3.69083
REV3L	0.392976	2.11775e-05	0.000204305	3.68972
ATP11C	0.41042	2.12021e-05	0.000204425	3.68947
OTOP3	-0.38691	2.12233e-05	0.000204511	3.68928
WDR33	0.400983	2.13158e-05	0.000205166	3.68789
TMEM68	0.40721	2.13065e-05	0.000205194	3.68784
ACSL5	0.350265	2.13504e-05	0.000205381	3.68744
RAB39A	0.374986	2.14338e-05	0.000206065	3.686
GMFG	0.379568	2.14594e-05	0.000206193	3.68573
DBNL	0.37597	2.14732e-05	0.000206207	3.6857
INTS7	0.378501	2.14986e-05	0.000206332	3.68543
EIF2B2	0.361879	2.15927e-05	0.000207116	3.68379
USP19	0.385079	2.16858e-05	0.000207771	3.68241
RPAP3	0.399343	2.16774e-05	0.00020781	3.68233
SOD2	0.365436	2.17797e-05	0.000208552	3.68079
ATP1A1	0.370785	2.19584e-05	0.000210143	3.67749
POMP	0.394999	2.20218e-05	0.000210629	3.67648
TFPI	0.389437	2.21455e-05	0.000211692	3.6743
DDB1	0.384852	2.21645e-05	0.000211752	3.67417
C5AR1	0.374003	2.2347e-05	0.000213374	3.67086
ATP5F1B	0.393077	2.23671e-05	0.000213444	3.67072
ABRAXAS1	0.383368	2.26792e-05	0.000216299	3.66495
TRIM58	0.376378	2.27337e-05	0.000216449	3.66464
TFRC	0.337602	2.27307e-05	0.000216543	3.66446
AGO4	0.38052	2.27264e-05	0.000216626	3.66429
AP1S2	0.37267	2.28163e-05	0.000216988	3.66356
CDK2	0.365896	2.2804e-05	0.000216995	3.66355
LBP	0.384371	2.28582e-05	0.000217263	3.66301
YPEL4	0.371684	2.29928e-05	0.000218295	3.66096
LAPTM5	0.380494	2.29871e-05	0.000218364	3.66082
SELENOF	0.33251	2.30403e-05	0.000218621	3.66031
SEPTIN2	0.385335	2.31968e-05	0.000219857	3.65786
PIP4K2A	0.35483	2.31912e-05	0.000219928	3.65772
SMC6	0.381351	2.32662e-05	0.000220265	3.65705
TPMT	0.387539	2.32653e-05	0.000220381	3.65682
NIFK	0.404702	2.34511e-05	0.000221891	3.65386
MRPL42	0.335597	2.35199e-05	0.00022229	3.65308
SASS6	0.369988	2.35332e-05	0.00022229	3.65308
WAS	0.360813	2.35137e-05	0.000222358	3.65295
ISG15	0.354278	2.36131e-05	0.00022292	3.65185
OAS2	0.384563	2.36442e-05	0.000223087	3.65152
SF3B1	0.395549	2.37023e-05	0.000223509	3.65071
DAZAP2	0.38443	2.37475e-05	0.000223684	3.65037
PGM1	0.320405	2.379e-05	0.000223706	3.65032
CEACAM3	0.369432	2.3764e-05	0.000223713	3.65031
IKBIP	0.372793	2.3746e-05	0.000223796	3.65015
JPT2	0.321267	2.37873e-05	0.000223806	3.65013
CTR9	0.379913	2.40527e-05	0.000226049	3.6458
E2F7	0.360818	2.42044e-05	0.00022722	3.64355
FAM177A1	0.376876	2.42036e-05	0.00022734	3.64333
MED28	0.390593	2.43968e-05	0.000228898	3.64036
SERF2	0.384692	2.44966e-05	0.000229705	3.63883
LYVE1	0.378843	2.45991e-05	0.00023028	3.63774
CSF3R	0.364447	2.45722e-05	0.000230285	3.63773
SVBP	0.370058	2.45877e-05	0.000230301	3.6377
COX11	0.381681	2.46194e-05	0.000230341	3.63763
PLEKHF2	0.383787	2.46625e-05	0.000230615	3.63711
G0S2	0.377713	2.4732e-05	0.000231136	3.63613
JAKMIP2	0.389172	2.47566e-05	0.000231236	3.63594
KIF9	0.388344	2.48646e-05	0.000232116	3.63429
FAM210B	0.366361	2.48963e-05	0.000232153	3.63423
ARRDC2	0.380387	2.48858e-05	0.000232184	3.63417
CCDC170	0.3869	2.49872e-05	0.00023287	3.63289
VPS26A	0.40286	2.50676e-05	0.00023349	3.63173
ITPK1	0.379471	2.51198e-05	0.000233716	3.63131
SNW1	0.390328	2.51084e-05	0.00023374	3.63127
EIF3C	0.373072	2.52653e-05	0.000234939	3.62905
KLHL11	0.378251	2.52916e-05	0.000235053	3.62883
ADARB1	0.402242	2.53292e-05	0.000235272	3.62843
CTPS1	0.38067	2.54338e-05	0.000235982	3.62712
PDCL	0.374416	2.54254e-05	0.000236034	3.62702
APOBEC3B	0.360123	2.55336e-05	0.000236777	3.62566
PPP3R1	0.382557	2.5574e-05	0.00023702	3.62522
XCL1	0.366399	2.56208e-05	0.000237322	3.62466
RBM42	0.378472	2.57751e-05	0.000238619	3.62229
TRAF5	0.383935	2.58334e-05	0.000239027	3.62155
GPS1	0.386382	2.58567e-05	0.00023911	3.6214
CHD8	0.378203	2.58872e-05	0.000239128	3.62137
IGF2BP3	0.39078	2.58812e-05	0.000239205	3.62123
TSPYL5	0.377282	2.61362e-05	0.000241295	3.61745
PLTP	0.394919	2.6167e-05	0.000241313	3.61742
ZBTB20	-0.379827	2.61548e-05	0.000241333	3.61738
NUP88	0.343816	2.62973e-05	0.000242381	3.6155
DOCK5	0.368486	2.64957e-05	0.000243941	3.61271
HES6	0.36463	2.64857e-05	0.000243984	3.61264
FASTKD3	0.384618	2.65623e-05	0.00024442	3.61186
ADSSL1	0.395248	2.66453e-05	0.000244915	3.61099
STIM1	0.379801	2.66345e-05	0.00024495	3.61092
PIGS	0.327527	2.66759e-05	0.000245061	3.61073
ANAPC7	0.384678	2.67166e-05	0.0002453	3.6103
CTDSP1	0.388362	2.6821e-05	0.000246124	3.60885
HIST1H2AC	0.364948	2.68366e-05	0.000246132	3.60883
COX6C	0.384279	2.6938e-05	0.000246927	3.60743
RIMKLB	0.378715	2.7044e-05	0.000247492	3.60644
TNNT1	0.365628	2.70367e-05	0.000247561	3.60632
MRPS18C	0.377378	2.70302e-05	0.000247636	3.60619
GPALPP1	0.350985	2.71303e-05	0.000248146	3.60529
PLEKHA4	0.382902	2.73142e-05	0.000249555	3.60283
LYSMD2	0.384646	2.73333e-05	0.000249594	3.60277
APIP	0.392468	2.73091e-05	0.000249645	3.60268
IGFBP4	0.379672	2.73784e-05	0.000249869	3.60229
PRR11	0.370017	2.73943e-05	0.000249878	3.60227
TTC27	0.357266	2.74115e-05	0.000249899	3.60224
PPP1R21	0.395789	2.74647e-05	0.000250248	3.60163
WDR1	0.374821	2.75298e-05	0.000250704	3.60084
NUDT16L1	0.36613	2.75574e-05	0.000250819	3.60064
ITGB1BP1	0.384897	2.77237e-05	0.000252195	3.59826
KCNAB2	0.366699	2.78522e-05	0.000253227	3.59649
G3BP1	0.387794	2.79233e-05	0.000253735	3.59562
CDC42SE1	0.394894	2.79771e-05	0.000254086	3.59502
SLC16A1	0.374449	2.80224e-05	0.00025436	3.59455
MRPL1	0.390037	2.81547e-05	0.000255422	3.59274
TNFRSF21	0.374586	2.82075e-05	0.000255624	3.5924
CD82	0.368949	2.81955e-05	0.000255653	3.59235
LYN	0.379486	2.84403e-05	0.000257594	3.58906
ATP5F1C	0.320987	2.84762e-05	0.00025778	3.58875
CHST10	0.371661	2.85e-05	0.000257855	3.58862
PIK3C3	0.372105	2.87785e-05	0.000260235	3.58463
S100A4	0.388457	2.88039e-05	0.000260324	3.58449
BECN1	0.382834	2.88858e-05	0.000260923	3.58349
ZBTB44	0.37831	2.89096e-05	0.000260997	3.58336
METTL4	0.388901	2.90086e-05	0.00026175	3.58211
PDCD6	0.345339	2.90793e-05	0.000262246	3.58129
MTMR11	0.376666	2.92101e-05	0.000263143	3.57981
STRIP2	0.369171	2.91967e-05	0.000263163	3.57977
SUCO	0.387146	2.92963e-05	0.000263777	3.57876
CENPS-CORT	0.377412	2.94896e-05	0.000265374	3.57614
ETFA	0.393367	2.95394e-05	0.00026568	3.57564
ZNF229	0.379095	2.96011e-05	0.000266092	3.57497
DAB2	0.383608	2.97457e-05	0.000267105	3.57332
STK39	0.382286	2.97298e-05	0.000267105	3.57332
TFAM	0.387242	2.9778e-05	0.000267251	3.57308
SPATA13	0.369165	2.99766e-05	0.000268889	3.57043
TBK1	0.37778	3.00826e-05	0.000269696	3.56912
CDC42EP4	0.370004	3.01553e-05	0.000270203	3.56831
MORC3	0.373794	3.01878e-05	0.00027035	3.56807
SNRNP40	0.369207	3.02523e-05	0.000270782	3.56738
CPPED1	0.36466	3.06139e-05	0.000273872	3.56245
HNRNPC	0.369568	3.06955e-05	0.000274456	3.56153
PRKCG	0.370634	3.07196e-05	0.000274525	3.56142
SMYD2	0.383511	3.08205e-05	0.000275279	3.56023
TUBA1C	0.33722	3.08373e-05	0.000275283	3.56022
BEX3	0.375279	3.10891e-05	0.00027694	3.55761
PRMT5	0.395886	3.10799e-05	0.000277005	3.55751
NOL9	0.377347	3.10507e-05	0.00027704	3.55746
ARRDC4	0.388727	3.10683e-05	0.000277049	3.55744
ISY1	0.367778	3.11487e-05	0.000277175	3.55725
SV2A	0.361138	3.11328e-05	0.000277181	3.55724
MFN2	0.377465	3.11813e-05	0.000277318	3.55702
EXOSC4	0.398957	3.14477e-05	0.000279539	3.55356
MTMR2	0.334015	3.1469e-05	0.000279579	3.55349
HEATR1	0.374501	3.15865e-05	0.000280326	3.55234
USB1	0.392317	3.16038e-05	0.000280331	3.55233
PMCH	0.36875	3.15817e-05	0.000280432	3.55217
SIVA1	0.387808	3.17333e-05	0.000281331	3.55078
SNRPC	0.350041	3.19193e-05	0.00028283	3.54847
C8orf76	0.400088	3.20043e-05	0.000283432	3.54755
PSMB4	0.372668	3.20686e-05	0.000283852	3.54691
USP37	0.389795	3.23818e-05	0.000286322	3.54315
OLFM4	0.36089	3.23737e-05	0.000286401	3.54303
AZIN1	0.39625	3.24471e-05	0.000286747	3.5425
PRELID3B	0.358627	3.25612e-05	0.000287604	3.5412
DHX30	0.374191	3.26338e-05	0.000288093	3.54047
HIST1H2BC	0.358182	3.27505e-05	0.000288971	3.53915
PCOLCE2	0.355413	3.28221e-05	0.00028945	3.53843
PBX3	0.368874	3.28808e-05	0.000289815	3.53788
WDR46	0.332479	3.30123e-05	0.000290821	3.53637
DHFR	0.360855	3.32153e-05	0.000291383	3.53554
PSMB8	0.341015	3.32028e-05	0.000291426	3.53547
DGCR6L	0.342992	3.31213e-05	0.000291475	3.5354
PPP4R3A	0.37906	3.31068e-05	0.0002915	3.53536
ALS2	0.38524	3.31979e-05	0.000291536	3.53531
OXCT1	0.374568	3.31691e-05	0.000291589	3.53523
POLA1	0.340548	3.31536e-05	0.000291605	3.5352
TMOD2	0.383521	3.31935e-05	0.00029165	3.53514
RASGRP2	0.350766	3.32854e-05	0.000291844	3.53485
SIGLEC10	0.351372	3.33874e-05	0.000292585	3.53375
UBL5	0.33306	3.34229e-05	0.000292744	3.53351
MAP3K5	0.379423	3.34522e-05	0.000292846	3.53336
KMO	0.355752	3.34746e-05	0.00029289	3.5333
DCP2	0.35758	3.36696e-05	0.000294442	3.531
GAN	0.400638	3.40889e-05	0.000297953	3.52585
AXL	0.375647	3.41531e-05	0.000298358	3.52526
PCGF6	0.349728	3.41867e-05	0.000298496	3.52506
FBXL5	0.379373	3.43737e-05	0.000299972	3.52292
DIPK2A	0.385999	3.44031e-05	0.000300072	3.52277
ABHD13	0.37727	3.44452e-05	0.000300283	3.52247
CLK2	0.381255	3.46278e-05	0.000301718	3.5204
CTBP2	0.346602	3.47748e-05	0.000302841	3.51878
TXLNB	-0.359553	3.48994e-05	0.000303768	3.51746
CTSS	0.365406	3.49593e-05	0.000304131	3.51694
ANKRD50	0.379395	3.5e-05	0.000304327	3.51666
TRIM46	0.367866	3.50526e-05	0.000304627	3.51623
CTSH	0.364403	3.51864e-05	0.00030563	3.5148
ADAM8	0.370321	3.53537e-05	0.000306925	3.51297
EYA1	0.376705	3.54151e-05	0.000307298	3.51244
UQCR11	0.357994	3.55056e-05	0.000307924	3.51156
GSK3B	0.387013	3.55587e-05	0.000308225	3.51113
ATF7	0.343893	3.56966e-05	0.000309099	3.5099
VNN2	0.372084	3.56952e-05	0.000309247	3.50969
TRMT12	0.360084	3.5841e-05	0.00031019	3.50837
NAPEPLD	0.389932	3.58872e-05	0.000310429	3.50804
SHQ1	0.329176	3.59375e-05	0.000310703	3.50765
KIAA0825	0.391745	3.60245e-05	0.000311134	3.50705
OLA1	0.368076	3.6022e-05	0.000311273	3.50686
COX6A1	0.377656	3.6154e-05	0.000312091	3.50572
FEN1	0.360634	3.62883e-05	0.000313089	3.50433
ASGR2	0.364612	3.65878e-05	0.000315511	3.50099
GALNT7	0.401914	3.6657e-05	0.000315945	3.50039
TMEM176A	0.3847	3.67525e-05	0.000316605	3.49948
M6PR	0.380586	3.68302e-05	0.000317111	3.49879
LMBR1	0.378327	3.68748e-05	0.000317332	3.49849
PTP4A2	0.372567	3.68978e-05	0.000317366	3.49844
ZNF578	0.355007	3.69716e-05	0.000317838	3.49779
ATP5MPL	0.368642	3.7079e-05	0.000318598	3.49676
CLEC10A	0.36251	3.71114e-05	0.000318712	3.4966
FCGR2A	0.367373	3.7159e-05	0.000318958	3.49627
RECQL4	0.345295	3.72122e-05	0.000319251	3.49587
PSMD7	0.376788	3.7235e-05	0.000319282	3.49583
MYL12B	0.388775	3.72629e-05	0.000319358	3.49572
PDCD10	0.383838	3.73074e-05	0.000319576	3.49543
NEK7	0.36793	3.74419e-05	0.000320236	3.49453
FCMR	0.369603	3.74169e-05	0.00032035	3.49438
TXNDC9	0.39683	3.74408e-05	0.00032039	3.49432
EIF2B1	0.380928	3.75776e-05	0.000321069	3.4934
IFI16	0.371747	3.75762e-05	0.000321221	3.4932
HIST1H2BB	0.378291	3.76808e-05	0.000321786	3.49243
APOL4	0.359338	3.79161e-05	0.000323136	3.49061
CPSF3	0.377115	3.78672e-05	0.000323214	3.49051
CYFIP2	0.368598	3.79144e-05	0.000323286	3.49041
PRKAR1A	0.377647	3.79026e-05	0.00032335	3.49033
SPTSSA	0.378733	3.79786e-05	0.000323504	3.49012
C5orf58	0.362357	3.80322e-05	0.000323796	3.48973
ZNF414	0.364835	3.80883e-05	0.000324109	3.48931
PPP2CB	0.373739	3.82318e-05	0.000324835	3.48834
FCGR1A	0.367606	3.81995e-05	0.00032489	3.48826
UBE2G2	0.360419	3.82196e-05	0.000324896	3.48826
RABGEF1	0.391781	3.82816e-05	0.000325093	3.48799
TNFAIP6	0.369657	3.83198e-05	0.000325252	3.48778
PRB4	-0.365025	3.83766e-05	0.000325569	3.48736
LSM14A	0.365555	3.8551e-05	0.000326718	3.48583
SIGLEC1	0.37018	3.85482e-05	0.000326859	3.48564
INTS6	0.362233	3.89274e-05	0.00032974	3.48183
LIMD2	0.37424	3.89578e-05	0.000329831	3.48171
ADGRG3	0.361487	3.90071e-05	0.000330082	3.48138
ZEB2	0.350796	3.92054e-05	0.000331591	3.4794
METTL18	0.364903	3.9348e-05	0.00033263	3.47804
NELFE	0.362746	3.93965e-05	0.000332704	3.47794
CIAO2B	0.373872	3.93913e-05	0.000332828	3.47778
EXOC1	0.34612	3.9463e-05	0.000333097	3.47743
TTI1	0.390357	3.95945e-05	0.000334039	3.4762
CENPL	0.351287	3.9671e-05	0.000334516	3.47558
TDP1	0.364114	3.98033e-05	0.000335462	3.47436
ARHGAP19-SLIT1	0.389588	3.99146e-05	0.000336231	3.47336
TTC5	0.383063	3.99436e-05	0.000336306	3.47327
FIBP	0.388659	4.0051e-05	0.000337041	3.47232
GTF2H3	0.351603	4.012e-05	0.000337452	3.47179
MCOLN1	0.374606	4.01795e-05	0.000337782	3.47136
BCAP29	0.363826	4.02031e-05	0.000337811	3.47133
MED4	0.398825	4.03343e-05	0.000338743	3.47013
TFB2M	0.387176	4.05642e-05	0.000340503	3.46788
CDYL2	0.369752	4.06024e-05	0.000340653	3.46769
ST6GALNAC2	0.376207	4.07095e-05	0.000341381	3.46676
SSX4	0.357225	4.10326e-05	0.000343917	3.46355
MRPL13	0.391958	4.11094e-05	0.000344389	3.46295
TRIP11	0.386459	4.12812e-05	0.000345483	3.46157
[truncated: 14,739 more rows]

## Sheet: ERMM_vs_LRMM
GENE	Mean_Diff_zScore_(LRMM-ERMM)	p_value	q_value	Minus_Log(q_value)
MAGEA1	0.631634	3.48079e-10	2.91307e-06	5.53565
BCAP31	0.604537	2.16639e-10	3.62611e-06	5.44056
ZNF728	0.644129	7.51044e-10	4.19033e-06	5.37775
ZNF723	0.602198	7.40257e-09	3.09761e-05	4.50897
TP53TG3D	0.576025	1.44487e-08	4.83684e-05	4.31544
PEX19	0.477582	2.48239e-08	5.93576e-05	4.22652
MAGEA3	0.561424	2.35898e-08	6.58077e-05	4.18172
TMEM183A	0.502138	7.83001e-08	0.000145621	3.83678
DDX53	0.580068	7.10262e-08	0.000148605	3.82797
KLHDC3	0.497218	8.94502e-08	0.000149722	3.82472
H2AFV	0.450347	1.17161e-07	0.00016342	3.7867
GLMP	0.459386	1.132e-07	0.00017225	3.76384
LRRTM4	0.551664	1.79828e-07	0.000177056	3.75189
MYH1	0.534004	1.39697e-07	0.000179865	3.74505
UAP1	0.486274	1.78471e-07	0.000186703	3.72885
NAA10	0.501727	1.57492e-07	0.000188293	3.72517
PIGC	0.438555	1.74049e-07	0.000194215	3.71172
TPP1	0.461402	2.28995e-07	0.000201732	3.69522
DCAF12L2	0.496113	2.4329e-07	0.00020361	3.6912
PPT1	0.430985	2.19244e-07	0.000203872	3.69064
COMMD4	0.371089	2.84128e-07	0.000206771	3.68451
HTR2C	0.519917	2.74201e-07	0.000208617	3.68065
RFX5	0.510455	2.63656e-07	0.000210146	3.67748
NXT2	0.431451	3.58302e-07	0.000222121	3.65341
DFFA	0.502311	3.45458e-07	0.000222395	3.65287
DSG1	0.539386	3.38943e-07	0.000226929	3.64411
DHFR	0.42831	4.37451e-07	0.000228814	3.64052
AIFM1	0.49833	3.96449e-07	0.000228819	3.64051
IP6K2	0.461687	3.30297e-07	0.000230354	3.6376
TAF9	0.473043	3.90681e-07	0.000233544	3.63163
MYOM3	0.528254	4.34782e-07	0.000234754	3.62939
POPDC3	0.520925	4.33906e-07	0.000242091	3.61602
TMEM14C	0.359554	5.02592e-07	0.000254921	3.59359
AAGAB	0.446486	5.79895e-07	0.000285479	3.54443
UBE2A	0.504105	6.03089e-07	0.000288415	3.53998
UGT2A1	0.529898	7.11895e-07	0.000330992	3.48018
BDKRB1	0.487619	7.62852e-07	0.000336016	3.47364
PFDN6	0.448702	7.45643e-07	0.000337313	3.47197
REC114	0.503919	8.12466e-07	0.000339977	3.46855
CCNQ	0.494427	8.00676e-07	0.000343634	3.4639
HMGB3	0.428975	8.55094e-07	0.000349087	3.45707
PABPC4L	0.528075	8.81102e-07	0.00035114	3.45452
NDUFA2	0.415119	9.9024e-07	0.000360318	3.44331
CDYL	0.496024	9.75627e-07	0.00036289	3.44023
YWHAQ	0.467658	1.02188e-06	0.000363919	3.439
VPS72	0.420224	9.69859e-07	0.000368943	3.43304
CT47B1	0.547433	9.47934e-07	0.000368989	3.43299
BCL9	0.451816	1.11679e-06	0.000389435	3.40956
XAGE1B	0.482801	1.30814e-06	0.000437911	3.35861
CHRM3	0.484099	1.42809e-06	0.000442656	3.35393
RCN2	0.452068	1.40708e-06	0.000444371	3.35225
DBI	0.443765	1.38582e-06	0.000446075	3.35059
BOLA3	0.372435	1.30786e-06	0.000446753	3.34993
CSAG1	0.497314	1.38116e-06	0.00045329	3.34362
ADAMTS14	0.494653	1.55416e-06	0.000456379	3.34067
PHB	0.396276	1.53131e-06	0.000457699	3.33942
TUBB	0.456329	1.58721e-06	0.000458047	3.33909
PSMC3	0.455416	1.64528e-06	0.000458979	3.33821
WDR72	0.508352	1.52152e-06	0.000463042	3.33438
NR1D1	0.434457	1.63515e-06	0.000463884	3.33359
ATL3	0.462766	1.72612e-06	0.000465997	3.33162
CR589904.2	0.51053	1.72463e-06	0.000473228	3.32493
SDHC	0.458142	1.7844e-06	0.000474084	3.32414
PPP2R1B	0.388199	1.90175e-06	0.000489714	3.31006
TMEFF1	0.474961	1.88907e-06	0.000494051	3.30623
MAPK6	0.448326	2.26507e-06	0.00054161	3.26631
ATP6AP1	0.453674	2.24177e-06	0.000543808	3.26455
QSOX1	0.454519	2.22824e-06	0.000548475	3.26084
TUBB4B	0.446259	2.2073e-06	0.000551429	3.25851
PSMB7	0.381699	2.36081e-06	0.000556553	3.25449
PKHD1	0.468295	2.20341e-06	0.000558798	3.25274
NMB	0.429998	2.7573e-06	0.000632216	3.19913
DSPP	0.480647	2.72864e-06	0.000634334	3.19768
TFDP2	0.345432	2.815e-06	0.000636722	3.19605
SF3B4	0.433114	2.90065e-06	0.00063883	3.19461
DRAP1	0.444242	2.88961e-06	0.000644883	3.19052
CEACAM16	0.478503	3.03676e-06	0.000660121	3.18038
SRP14	0.461645	3.12553e-06	0.000670706	3.17347
EID1	0.432518	3.23361e-06	0.000685116	3.16424
SCARB2	0.449259	3.40106e-06	0.000711587	3.14777
MAGEE2	0.466432	3.60255e-06	0.000735361	3.1335
CHML	0.412792	3.56088e-06	0.000735827	3.13322
APOBEC3B	0.456724	3.66782e-06	0.000739662	3.13097
GDI1	0.448038	3.91273e-06	0.000770485	3.11324
TNFRSF18	-0.476831	3.90191e-06	0.000777502	3.1093
CHID1	0.442722	4.10553e-06	0.00078089	3.10741
TMLHE	0.388808	4.08393e-06	0.000785711	3.10474
CD3E	0.401911	4.04821e-06	0.000787894	3.10353
NHP2	0.385894	4.33505e-06	0.000788697	3.10309
MAGEA12	0.479657	4.31254e-06	0.000793223	3.1006
HTATIP2	0.373151	4.28046e-06	0.00079607	3.09905
DDT	0.380254	4.2509e-06	0.000799456	3.09721
PPIA	0.434879	4.71613e-06	0.000822277	3.08498
VSNL1	0.464108	4.59883e-06	0.00082769	3.08213
BANF1	0.440767	4.70074e-06	0.000828221	3.08185
ACBD6	0.440088	4.69975e-06	0.000836856	3.07735
ACY1	0.443465	4.88633e-06	0.000843169	3.07409
ROMO1	0.426697	5.04904e-06	0.000862355	3.06431
PSMA1	0.39389	5.72972e-06	0.000931108	3.031
PI15	0.474552	5.70443e-06	0.000936086	3.02868
DARS2	0.39036	5.61648e-06	0.000940087	3.02683
PSMD4	0.432519	5.68659e-06	0.000942398	3.02577
SOD1	0.420427	5.58047e-06	0.000943494	3.02526
NXPE3	0.415752	5.8742e-06	0.000945407	3.02438
PSMC2	0.420816	6.07633e-06	0.000968625	3.01384
NDUFA4	0.388041	6.21108e-06	0.000980765	3.00843
WEE1	0.400753	6.39216e-06	0.000999925	3.00003
SNRPG	0.392912	6.56146e-06	0.00101691	2.99272
TIMM8B	0.438711	6.85028e-06	0.00102375	2.98981
SRPK2	0.440476	6.8193e-06	0.0010283	2.98788
KBTBD4	0.367977	6.77625e-06	0.0010311	2.9867
STARD13	-0.472229	7.04726e-06	0.00103471	2.98518
KIF18A	0.38113	7.12904e-06	0.00103762	2.98396
ZBBX	0.481057	6.77447e-06	0.00104028	2.98285
OR1J4	0.443017	7.03268e-06	0.00104171	2.98225
RAMACL	0.365344	7.3327e-06	0.00105806	2.97549
HNRNPF	0.416315	7.67928e-06	0.00108929	2.96286
SLC39A1	0.370148	7.65776e-06	0.00109552	2.96038
KIAA1958	0.417454	8.14046e-06	0.00109883	2.95907
GPR15	-0.42463	8.13332e-06	0.00110679	2.95593
TRIM21	0.427485	7.88626e-06	0.00110925	2.95497
LDHA	0.393908	8.09396e-06	0.00111047	2.95449
NOP10	0.4287	8.09011e-06	0.00111911	2.95113
BUB1	0.402662	8.37256e-06	0.00112112	2.95035
NIT1	0.37099	8.05471e-06	0.0011235	2.94943
SUV39H2	0.386123	8.75014e-06	0.00115323	2.93809
IDH3A	0.404878	8.83577e-06	0.00115541	2.93726
CTSV	0.452201	8.70388e-06	0.00115623	2.93695
CD19	-0.455954	9.36193e-06	0.00116074	2.93526
GBA	0.415399	9.25344e-06	0.00116454	2.93384
ENSA	0.449034	9.05326e-06	0.00116564	2.93344
NUP133	0.403944	8.99543e-06	0.00116717	2.93286
RPL7L1	0.435444	9.35542e-06	0.00116859	2.93234
ETV4	0.438507	9.50925e-06	0.00117034	2.93169
IGSF8	0.423259	9.23151e-06	0.00117058	2.9316
MAGEA6	0.434288	9.59684e-06	0.0011725	2.93089
HIST1H1C	0.401298	9.18109e-06	0.00117308	2.93067
HEXA	0.422568	9.81832e-06	0.00119086	2.92414
HCFC1	0.436606	9.95932e-06	0.00119927	2.92108
ADSS	0.420379	1.03209e-05	0.00122518	2.9118
SELENOH	0.411642	1.03028e-05	0.00123177	2.90947
VAMP7	0.417606	1.0683e-05	0.00124175	2.90597
BOLA2B	0.43546	1.07771e-05	0.00124404	2.90516
TMA7	0.407572	1.06581e-05	0.00124752	2.90395
SCNM1	0.418202	1.06364e-05	0.00125374	2.90179
RBBP8	0.373155	1.12001e-05	0.00127528	2.89439
ICE2	0.377809	1.1165e-05	0.00128	2.89279
NDUFS2	0.429452	1.15946e-05	0.00128524	2.89102
PSMB4	0.422325	1.13657e-05	0.0012854	2.89096
DDX59	0.433873	1.16917e-05	0.00128747	2.89026
GLRA3	0.458673	1.14863e-05	0.00129032	2.8893
UGT2A2	0.477136	1.15922e-05	0.00129353	2.88822
ZNF16	0.397649	1.18705e-05	0.00129862	2.88652
GAGE2A	0.469038	1.19736e-05	0.00130139	2.88559
PSMB8	0.362622	1.21672e-05	0.0013139	2.88144
UNC5D	0.433314	1.24373e-05	0.00133446	2.87469
CPSF3	0.412708	1.26146e-05	0.00134486	2.87132
THYN1	0.37438	1.30306e-05	0.00138042	2.85999
IL22RA1	0.430041	1.34078e-05	0.00140262	2.85306
TSPAN3	0.411699	1.33734e-05	0.00140782	2.85145
HIST1H2BC	0.398566	1.36179e-05	0.00141576	2.84901
RAB23	0.390922	1.38733e-05	0.0014334	2.84363
FAM122B	0.397869	1.40133e-05	0.00143899	2.84194
DPY19L1	0.339131	1.42302e-05	0.00145235	2.83793
ARL10	-0.442038	1.43794e-05	0.00145868	2.83604
ARF5	0.346625	1.46453e-05	0.00146787	2.83331
IRAK1	0.43999	1.46036e-05	0.0014725	2.83195
MPC2	0.385604	1.48557e-05	0.00148009	2.82971
GGT1	0.408597	1.54301e-05	0.00149288	2.82597
SPATA17	0.438578	1.53706e-05	0.00149577	2.82513
ZDHHC5	0.377397	1.53503e-05	0.00150254	2.82317
TAP1	0.41709	1.52097e-05	0.00150639	2.82206
GUSB	0.424756	1.532e-05	0.00150839	2.82149
METTL26	0.431324	1.62459e-05	0.00156278	2.8061
CIB1	0.439433	1.63564e-05	0.00156442	2.80565
FRG1	0.354154	1.65272e-05	0.00157178	2.80361
ISCA1	0.364799	1.69808e-05	0.00159676	2.79676
POLR2L	0.319846	1.69148e-05	0.00159955	2.796
ALG3	0.387615	1.73169e-05	0.00161028	2.7931
NUSAP1	0.375962	1.72498e-05	0.00161301	2.79236
FUS	0.418794	1.79906e-05	0.00166368	2.77893
CHMP4B	0.422499	1.82022e-05	0.001674	2.77624
RHOC	0.379656	1.87696e-05	0.00170742	2.76766
APTX	0.347455	1.87525e-05	0.00171518	2.76569
SIAE	0.430612	1.89782e-05	0.00171707	2.76521
ZNF729	0.448871	1.917e-05	0.00172509	2.76319
TEX101	0.472455	1.95053e-05	0.00173659	2.7603
CIAO2A	0.354022	1.94076e-05	0.00173714	2.76017
AK7	0.413375	1.98072e-05	0.00174491	2.75823
PRR11	0.389779	1.97921e-05	0.0017528	2.75627
PRG2	-0.416199	2.06313e-05	0.00175293	2.75624
GABRB2	0.429677	2.02356e-05	0.00175494	2.75574
HNRNPH2	0.366253	2.05652e-05	0.00175622	2.75542
SPPL2A	0.42992	2.08879e-05	0.00175689	2.75525
GLB1L	0.398345	2.03793e-05	0.00175829	2.75491
ATP5PD	0.401472	2.01986e-05	0.00176086	2.75428
PET100	0.395721	2.0516e-05	0.00176101	2.75424
FLOT1	0.423827	2.01004e-05	0.00176147	2.75412
TOB1	0.409335	2.08389e-05	0.00176162	2.75409
HNRNPDL	0.398619	2.14481e-05	0.00178606	2.7481
SULF2	0.40989	2.14157e-05	0.00179228	2.74659
RAD23A	0.389654	2.16896e-05	0.00179723	2.7454
LDHB	0.383773	2.26036e-05	0.00184556	2.73387
IARS2	0.412031	2.25326e-05	0.00184878	2.73312
PRCC	0.419912	2.29864e-05	0.00184975	2.73289
ELMO2	0.382693	2.24577e-05	0.00185171	2.73243
RPP40	0.374676	2.2939e-05	0.00185485	2.73169
APH1A	0.401053	2.28406e-05	0.00185585	2.73146
HAUS7	0.380343	2.33409e-05	0.00186928	2.72833
NIPSNAP3A	0.339719	2.34969e-05	0.00187282	2.7275
MAGEC1	0.380934	2.37258e-05	0.0018821	2.72536
ADPGK	0.356442	2.41756e-05	0.0018821	2.72536
WDR41	0.367587	2.52371e-05	0.0018858	2.7245
ADAR	0.420901	2.43495e-05	0.00188686	2.72426
CDC42SE1	0.398381	2.41258e-05	0.001887	2.72423
DMRTC1B	-0.42919	2.39172e-05	0.00188833	2.72392
C11orf68	0.368686	2.44846e-05	0.00188859	2.72386
EMB	0.388941	2.53883e-05	0.00188867	2.72384
HNRNPL	0.402777	2.40541e-05	0.00189023	2.72349
ANP32A	0.399613	2.52131e-05	0.00189245	2.72297
PIP5K1A	0.411888	2.5154e-05	0.00189652	2.72204
UBL5	0.347681	2.50937e-05	0.00190054	2.72112
PAGE5	0.432133	2.4779e-05	0.00190253	2.72067
RPA3	0.364771	2.48957e-05	0.00190276	2.72062
PFDN1	0.370606	2.50422e-05	0.00190526	2.72005
PRKCI	0.392585	2.57957e-05	0.00191048	2.71886
TMEM14B	0.344541	2.63122e-05	0.0019232	2.71598
SYT13	0.416881	2.70888e-05	0.00192941	2.71457
FBXO45	0.34952	2.62908e-05	0.00193007	2.71443
TICAM1	0.418701	2.61955e-05	0.00193155	2.7141
MAGEB16	0.462845	2.7047e-05	0.00193467	2.71339
PSMD14	0.363832	2.69405e-05	0.00193532	2.71325
TMCO1	0.378216	2.68992e-05	0.00194068	2.71205
RUVBL1	0.363261	2.6685e-05	0.00194197	2.71176
CCT4	0.396744	2.68473e-05	0.00194533	2.71101
STK26	0.368335	2.78116e-05	0.00196418	2.70682
ZFAND6	0.409871	2.77468e-05	0.00196791	2.706
BRIP1	0.392716	2.81268e-05	0.00197809	2.70375
ADAM10	0.395491	2.837e-05	0.00198685	2.70184
TMOD3	0.354478	2.87506e-05	0.00200512	2.69786
MRPL43	0.357185	2.88741e-05	0.00200537	2.69781
ARL13B	0.293083	2.92417e-05	0.00202251	2.69411
EI24	0.347435	3.00804e-05	0.00207196	2.68362
ATRN	0.403878	3.06041e-05	0.00208232	2.68145
S1PR2	0.387157	3.05537e-05	0.00208738	2.6804
OLA1	0.309017	3.05327e-05	0.00209449	2.67892
TINF2	0.402834	3.11996e-05	0.00210572	2.6766
NUP62	0.406192	3.1161e-05	0.00211163	2.67538
GABRA3	0.425232	3.23512e-05	0.00217468	2.6626
RMDN1	0.417101	3.25918e-05	0.00218209	2.66113
RBBP7	0.400944	3.29517e-05	0.00219739	2.65809
NCOA6	0.413939	3.32164e-05	0.00219754	2.65806
C4B	0.403969	3.31086e-05	0.00219909	2.65776
HEG1	0.398237	3.36169e-05	0.00221528	2.65457
NACC1	0.374375	3.4191e-05	0.00224427	2.64892
IBSP	0.424067	3.4517e-05	0.00224804	2.6482
TNFRSF13C	-0.436305	3.45044e-05	0.002256	2.64666
GLRX2	0.347358	3.47988e-05	0.0022576	2.64635
POC1A	0.356626	3.53931e-05	0.0022873	2.64068
NOL10	0.413253	3.56806e-05	0.00228821	2.6405
TTC1	0.352004	3.55898e-05	0.00229116	2.63994
TOPBP1	0.360389	3.59942e-05	0.00229951	2.63836
APOBEC3C	0.418491	3.63638e-05	0.00230552	2.63723
PSMD2	0.407956	3.62405e-05	0.00230644	2.63706
MEMO1	0.368579	3.67332e-05	0.00232015	2.63448
PDCD6	0.351345	3.70795e-05	0.00233322	2.63204
TMEM126B	0.329683	3.7375e-05	0.00234301	2.63023
UBE2K	0.371908	3.83836e-05	0.0023795	2.62352
HTATSF1	0.40606	3.88421e-05	0.00238146	2.62316
CFB	0.345062	3.83155e-05	0.00238411	2.62267
COX17	0.385684	3.87821e-05	0.00238653	2.62223
POLR2D	0.385965	3.86678e-05	0.00238827	2.62192
DNAJC19	0.325878	3.8314e-05	0.00239291	2.62107
CCDC148	0.394449	3.95458e-05	0.00240697	2.61853
MMGT1	0.385185	3.98897e-05	0.00241037	2.61792
HAUS2	0.32907	3.94814e-05	0.00241182	2.61765
UQCC2	0.386592	3.98195e-05	0.00241485	2.61711
SELPLG	0.419191	4.02669e-05	0.00242441	2.61539
CLSTN1	0.397679	4.05135e-05	0.00243052	2.6143
PPP2R5D	0.388802	4.09918e-05	0.00245043	2.61076
MIEN1	0.286018	4.2476e-05	0.00251224	2.59994
UCK2	0.361225	4.23569e-05	0.00251408	2.59962
VDAC2	0.351328	4.28805e-05	0.00251836	2.59888
TMC1	0.431916	4.23125e-05	0.00252038	2.59853
PSMC5	0.390147	4.28351e-05	0.00252455	2.59782
DCDC1	0.431637	4.31558e-05	0.00252567	2.59762
YWHAB	0.397235	4.3351e-05	0.00252826	2.59718
MRPL27	0.340875	4.38183e-05	0.00253782	2.59554
TFB2M	0.34635	4.37166e-05	0.00254072	2.59504
ALOX15	-0.393445	4.49509e-05	0.00257667	2.58894
TEAD3	0.403353	4.49058e-05	0.00258293	2.58789
NDUFA11	0.382924	4.48397e-05	0.00258802	2.58703
GGH	0.365429	4.55073e-05	0.00259966	2.58508
SMIM29	0.377752	4.79795e-05	0.0026159	2.58238
PSORS1C1	0.402148	4.59849e-05	0.00261801	2.58203
ATP5PF	0.368891	4.8226e-05	0.0026208	2.58157
PAICS	0.380952	4.79358e-05	0.00262206	2.58136
ARMC10	0.340324	4.78331e-05	0.00262502	2.58087
C3orf67	0.40164	4.69756e-05	0.00262969	2.5801
LAMTOR1	0.343256	4.77768e-05	0.00263055	2.57995
TSTD1	0.350418	4.75174e-05	0.0026336	2.57945
MAD2L1	0.346664	4.69248e-05	0.00263566	2.57911
GAB4	0.455572	4.72508e-05	0.00263628	2.57901
APLP2	0.380213	4.77735e-05	0.00263905	2.57855
CLIC1	0.38701	4.75118e-05	0.00264204	2.57806
ZMYM1	0.342105	4.66024e-05	0.00264417	2.57771
NSDHL	0.365276	4.69232e-05	0.00264445	2.57767
ECI2	0.406921	4.88857e-05	0.00264805	2.57707
ATP5MC2	0.362593	4.6834e-05	0.00264834	2.57703
CHSY1	0.407435	4.93454e-05	0.00265577	2.57581
RING1	0.366567	5.00149e-05	0.00265762	2.57551
NDUFB4	0.386494	4.99071e-05	0.00266033	2.57506
SLIRP	0.331582	4.92824e-05	0.00266093	2.57497
IFT46	0.368013	4.96029e-05	0.00266107	2.57494
USP31	0.394482	4.98648e-05	0.00266657	2.57405
WDR46	0.334122	5.06016e-05	0.00268029	2.57182
SUPV3L1	0.362054	5.21652e-05	0.00275439	2.55997
CDK5RAP1	0.376049	5.23654e-05	0.00275626	2.55968
TOMM6	0.291002	5.28601e-05	0.00277358	2.55696
RHOG	0.35641	5.30781e-05	0.00277632	2.55653
DUSP22	0.380384	5.56852e-05	0.0027906	2.5543
CARD17	0.405488	5.39166e-05	0.00279398	2.55378
HPF1	0.284487	5.55945e-05	0.00279442	2.55371
LANCL1	0.352016	5.54613e-05	0.00279612	2.55344
XPR1	0.356623	5.38555e-05	0.00279948	2.55292
NDUFB3	0.376749	5.50444e-05	0.0028004	2.55278
CCT6A	0.332119	5.37196e-05	0.00280112	2.55267
DCP1B	0.383645	5.62404e-05	0.00280164	2.55259
MTCH2	0.375067	5.60833e-05	0.00280216	2.55251
CLPX	0.346881	5.54317e-05	0.00280307	2.55237
GID8	0.358398	5.52931e-05	0.00280454	2.55214
ZNF584	0.340487	5.43334e-05	0.00280689	2.55177
STIM1	0.379177	5.46712e-05	0.00280701	2.55176
RNF115	0.406369	5.50376e-05	0.00280859	2.55151
PSME2	0.382103	5.48916e-05	0.00280971	2.55134
GABRG2	0.38897	5.45633e-05	0.00281009	2.55128
URB2	0.351476	5.76333e-05	0.00286251	2.54325
VOPP1	0.389435	5.78133e-05	0.00286296	2.54319
GNB1	0.377757	5.8971e-05	0.00287772	2.54095
PATZ1	0.33279	5.83347e-05	0.00288025	2.54057
CFAP97	0.340441	5.89262e-05	0.00288394	2.54001
PIGX	0.315151	5.89169e-05	0.00289194	2.53881
ARHGEF2	0.397851	5.88396e-05	0.00289664	2.53811
C4A	0.39156	5.97261e-05	0.00290609	2.53669
TIPIN	0.369935	6.09006e-05	0.00295465	2.52949
CACYBP	0.350113	6.20659e-05	0.00297667	2.52627
YY1AP1	0.382475	6.19366e-05	0.00297901	2.52593
NME5	0.401785	6.30167e-05	0.00297959	2.52584
SCAMP4	0.418952	6.37352e-05	0.00297989	2.5258
NDUFS4	0.30934	6.23217e-05	0.0029804	2.52573
SCAMP3	0.378934	6.28604e-05	0.00298061	2.52569
GLRX3	0.378287	6.25077e-05	0.00298078	2.52567
DLAT	0.374108	6.3263e-05	0.00298281	2.52538
FAM174C	0.390235	6.27887e-05	0.00298567	2.52496
ANXA2	0.392071	6.37131e-05	0.0029872	2.52474
OIP5	0.349623	6.19347e-05	0.0029875	2.52469
SLC26A7	0.388235	6.42739e-05	0.00298838	2.52456
MRPL4	0.395478	6.17875e-05	0.00298902	2.52447
HSPB8	0.408338	6.3599e-05	0.00299023	2.5243
IQUB	0.396955	6.47311e-05	0.00299301	2.52389
NDUFS6	0.333639	6.42213e-05	0.00299425	2.52371
MAGEB1	0.439267	6.56689e-05	0.002995	2.5236
COX20	0.385161	6.46663e-05	0.0029983	2.52313
NDUFAF1	0.331792	6.56233e-05	0.0030011	2.52272
UFC1	0.406271	6.54657e-05	0.00300209	2.52258
EIF2AK2	0.380642	6.54286e-05	0.00300864	2.52163
QRICH1	0.378321	6.52729e-05	0.00300974	2.52147
MRPL20	0.385257	6.74552e-05	0.00306811	2.51313
B3GAT3	0.388648	6.92912e-05	0.00308457	2.51081
SRP9	0.290809	6.9259e-05	0.00309135	2.50985
ALDH9A1	0.297303	6.89075e-05	0.00309216	2.50974
FDPS	0.399799	6.87381e-05	0.00309284	2.50964
TPI1	0.37866	6.8191e-05	0.00309317	2.5096
SNX17	0.389685	6.91716e-05	0.0030957	2.50924
HAMP	0.393939	6.86568e-05	0.00309751	2.50899
ENO1	0.387372	6.99296e-05	0.00310472	2.50798
BARD1	0.349389	6.86551e-05	0.00310581	2.50783
GRIA2	0.408178	7.07841e-05	0.00313435	2.50385
CCNB1	0.334973	7.1587e-05	0.00315322	2.50125
AHCY	0.371682	7.15855e-05	0.00316147	2.50011
NRAS	0.395384	7.27097e-05	0.00319427	2.49563
PCDHB5	0.385814	7.30738e-05	0.00320186	2.4946
KIF14	0.331638	7.36214e-05	0.00321743	2.49249
FBXW9	0.36796	7.44206e-05	0.00324388	2.48893
PSMA4	0.324045	7.46233e-05	0.00324427	2.48888
RAB1B	0.326996	7.52063e-05	0.00325272	2.48775
TXN	0.330257	7.50755e-05	0.00325548	2.48739
RHBDD2	0.34315	7.65068e-05	0.00327512	2.48477
SERF2	0.394355	7.61321e-05	0.00327583	2.48468
PTCH2	-0.391483	7.63283e-05	0.00327585	2.48468
XAGE1A	0.403516	7.60687e-05	0.00328154	2.48392
MAATS1	-0.393295	7.72967e-05	0.00330049	2.48142
DGCR6L	0.335878	7.75778e-05	0.00330406	2.48095
ZNF687	0.380857	7.89346e-05	0.00331962	2.47891
NSMCE2	0.308252	7.85731e-05	0.0033211	2.47872
COPS5	0.323422	7.84619e-05	0.0033248	2.47823
FRMD5	0.373708	7.82843e-05	0.00332569	2.47812
DALRD3	0.370218	7.89023e-05	0.00332662	2.478
SPATA31D1	0.436916	7.95306e-05	0.00332796	2.47782
CALM2	0.368533	7.93388e-05	0.00332825	2.47778
POMGNT1	0.366559	7.99878e-05	0.00333874	2.47642
ZNF22	0.347399	8.05277e-05	0.0033446	2.47566
CELF1	0.320398	8.07546e-05	0.00334572	2.47551
DONSON	0.337391	8.10569e-05	0.00334995	2.47496
DCLRE1A	0.325697	8.0484e-05	0.0033511	2.47481
DUT	0.397399	8.20212e-05	0.00336488	2.47303
PHF19	0.369336	8.16746e-05	0.00336717	2.47274
NDUFB9	0.314904	8.20081e-05	0.00337261	2.47203
RASEF	0.40115	8.29955e-05	0.00338	2.47108
ATG3	0.324131	8.26488e-05	0.00338234	2.47078
ACTL8	0.429281	8.28969e-05	0.00338421	2.47054
LIN7C	0.37674	8.37833e-05	0.0034038	2.46804
PCCB	0.365184	8.53944e-05	0.00345249	2.46187
RPS27L	0.338735	8.53255e-05	0.00345806	2.46117
FIBP	0.415481	8.57877e-05	0.00346003	2.46092
BDH1	0.356949	8.62295e-05	0.00346117	2.46078
SLC25A14	0.331488	8.61881e-05	0.00346783	2.45994
FLAD1	0.340547	8.71617e-05	0.00349022	2.45715
MCM6	0.371286	8.86735e-05	0.00354228	2.45072
SUPT4H1	0.299539	8.88955e-05	0.0035427	2.45067
RAB11A	0.361739	8.95789e-05	0.00356145	2.44837
CD28	0.375187	9.02861e-05	0.00356417	2.44804
GNPAT	0.330631	9.14239e-05	0.00356702	2.44769
FUNDC2	0.348281	8.99734e-05	0.00356866	2.44749
DNASE1L1	0.384199	9.01904e-05	0.00356881	2.44748
CCT3	0.36695	9.10578e-05	0.00356938	2.44741
DGUOK	0.363767	9.13742e-05	0.00357342	2.44692
ELOB	0.376134	9.10524e-05	0.00357755	2.44641
CNTNAP4	0.422612	9.09657e-05	0.00358255	2.44581
CACNA1I	-0.374248	9.24689e-05	0.00359941	2.44377
NPTN	0.336068	9.29853e-05	0.00361111	2.44236
MDH1B	0.387538	9.34282e-05	0.00361155	2.44231
SSBP1	0.319004	9.40934e-05	0.00361224	2.44222
CEP97	0.404625	9.33777e-05	0.00361795	2.44154
TIMM17B	0.27731	9.40365e-05	0.00361835	2.44149
ZBTB44	0.36659	9.38812e-05	0.0036207	2.44121
PARP9	0.404052	9.57204e-05	0.00363304	2.43973
GHITM	0.350228	9.59856e-05	0.00363486	2.43951
MPI	0.404713	9.56955e-05	0.00364034	2.43886
RNF145	0.349125	9.56591e-05	0.00364725	2.43803
CACUL1	0.352896	9.54524e-05	0.00364768	2.43798
RABIF	0.357017	9.53631e-05	0.0036526	2.4374
SEPHS1	0.3846	9.76647e-05	0.00366527	2.43589
DEDD	0.375688	9.74573e-05	0.00366571	2.43584
CTSK	0.371085	9.70273e-05	0.00366601	2.43581
HAUS4	0.349413	9.79428e-05	0.00366749	2.43563
UBE2N	0.345971	9.81746e-05	0.00366796	2.43558
ANXA7	0.340955	9.84128e-05	0.00366867	2.43549
MAGEA4	0.434083	9.74185e-05	0.0036725	2.43504
SLC25A5	0.378664	9.93981e-05	0.00367268	2.43502
PTPMT1	0.370435	9.92935e-05	0.00367693	2.43451
CHMP5	0.371406	9.99817e-05	0.00367801	2.43439
FAM3A	0.310949	9.89122e-05	0.00367909	2.43426
TNFRSF11B	0.375274	9.91326e-05	0.00367912	2.43426
CLDND1	0.352388	9.97985e-05	0.00367936	2.43423
RER1	0.313539	0.000100627	0.00369364	2.43255
GSK3A	0.367623	0.000102542	0.00373931	2.42721
EIF3G	0.372785	0.000102506	0.00374618	2.42641
PPP4R3C	0.406369	0.00010305	0.00374966	2.42601
CSAG3	0.409096	0.00010359	0.00375303	2.42562
HCN1	0.403015	0.00010247	0.00375306	2.42561
RBMS1	0.392855	0.000103468	0.00375673	2.42519
PARG	0.386862	0.000104552	0.00376342	2.42442
MOB4	0.352038	0.000104493	0.00376939	2.42373
MORF4L1	0.378338	0.000104342	0.00377207	2.42342
MGST3	0.317535	0.000105216	0.00377919	2.4226
NECTIN4	0.39863	0.000105498	0.00378122	2.42237
RPRD2	0.383042	0.000105767	0.00378274	2.42219
PAFAH1B3	0.353443	0.0001063	0.00378565	2.42186
WBP1L	0.400685	0.000106204	0.00379029	2.42133
RBMX2	0.383123	0.000106942	0.00380043	2.42017
HACD3	0.327697	0.000107173	0.00380057	2.42015
FH	0.344568	0.000107425	0.00380145	2.42005
RBM23	0.357768	0.000108454	0.00382976	2.41683
ISG20L2	0.373174	0.000108842	0.00383538	2.41619
SAMD9L	0.364577	0.000109793	0.00383655	2.41606
METTL5	0.329571	0.000109272	0.00384243	2.41539
COX6C	0.357823	0.00010974	0.00384273	2.41536
HIST1H3B	0.341892	0.000110632	0.0038498	2.41456
CRTAP	0.365264	0.000110404	0.00384987	2.41455
AL583836.1	0.408426	0.00010973	0.00385044	2.41449
TRAF4	0.37511	0.000111195	0.00386138	2.41326
ATP6V0E1	0.31947	0.000111581	0.00386676	2.41265
PYCR2	0.361611	0.000113115	0.00388771	2.41031
VPS26A	0.297413	0.000113436	0.00389076	2.40997
FAM227A	0.393733	0.000112767	0.00389176	2.40985
CHP1	0.284945	0.000112545	0.00389209	2.40982
B4GALT3	0.394843	0.000113045	0.00389329	2.40968
THNSL1	0.34154	0.000113915	0.00389921	2.40902
SAC3D1	0.324382	0.000116729	0.00390763	2.40809
PRDX3	0.321723	0.000114494	0.00391101	2.40771
CSMD1	0.406069	0.000116685	0.00391398	2.40738
TDRD7	0.361191	0.000116438	0.00392142	2.40656
UBL4A	0.364646	0.000116685	0.00392182	2.40651
NCBP2	0.347175	0.000116408	0.00392831	2.40579
MRPS27	0.349279	0.000115939	0.00392832	2.40579
GRINA	0.346388	0.000115708	0.00392844	2.40578
TGOLN2	0.376608	0.000116194	0.00392899	2.40572
SLC5A6	0.39334	0.00011532	0.00393121	2.40547
TBRG4	0.346851	0.000119085	0.00393145	2.40545
DNASE2	0.345436	0.000115571	0.00393177	2.40541
NDUFS5	0.32755	0.00012006	0.00393261	2.40532
NCDN	0.309872	0.000117722	0.003933	2.40528
ZRANB1	0.323781	0.000120361	0.00393476	2.40508
HMGXB4	0.330139	0.000118959	0.00393505	2.40505
HMGN3	0.400146	0.000120669	0.00393713	2.40482
SH2B2	0.368586	0.000118319	0.00393722	2.40481
PEX5	0.370884	0.000118795	0.00393739	2.40479
SNRPF	0.328974	0.000119567	0.00393958	2.40455
ZCRB1	0.364481	0.00012006	0.00394032	2.40447
IPO9	0.336941	0.000119882	0.0039422	2.40426
CCNB2	0.336737	0.00011877	0.00394438	2.40402
FAM133A	0.343595	0.000118299	0.00394441	2.40402
PHPT1	0.402617	0.000122391	0.00394717	2.40371
MDH1	0.348102	0.000122321	0.00395254	2.40312
PIGT	0.348263	0.000122209	0.00395654	2.40268
MPLKIP	0.336994	0.000121678	0.00396235	2.40205
SF3B6	0.3435	0.000122165	0.0039628	2.402
LRRC57	0.360025	0.000122028	0.00396604	2.40164
SEC11A	0.315774	0.000123278	0.00396812	2.40142
FAHD1	0.294101	0.000126111	0.00400541	2.39735
MRPL24	0.345353	0.000125883	0.00400576	2.39732
DYNLL2	0.31513	0.000126421	0.00400763	2.39711
NELFCD	0.348095	0.000125519	0.00400941	2.39692
UBA3	0.296092	0.000124812	0.00400981	2.39688
OR56A3	0.412482	0.000125776	0.00400998	2.39686
FAM189B	0.372742	0.000125182	0.00401397	2.39643
RAB25	0.390712	0.000125459	0.00401517	2.3963
IDS	0.392467	0.00012739	0.00403074	2.39462
UQCRC1	0.376641	0.000129164	0.0040562	2.39188
PPP1CA	0.371625	0.000128781	0.0040594	2.39154
ZNF768	0.366117	0.000128595	0.00406119	2.39135
HNRNPH3	0.362027	0.000129084	0.00406129	2.39134
MRPL32	0.376198	0.000129697	0.00406531	2.39091
NES	0.386367	0.000130589	0.00407798	2.38955
CCSAP	0.393737	0.000130563	0.0040848	2.38883
MAGEB6	0.423501	0.000132522	0.00413064	2.38398
IFT22	0.350877	0.000133677	0.00414348	2.38264
ABHD6	0.346657	0.00013333	0.0041481	2.38215
RUNX3	0.379248	0.000133591	0.0041485	2.38211
ATP5MC1	0.371069	0.000134729	0.0041607	2.38083
IDH3G	0.3747	0.000134542	0.00416259	2.38064
EBNA1BP2	0.374359	0.000135187	0.00416715	2.38016
UBL7	0.36616	0.000137206	0.00419078	2.3777
SLC29A1	0.359296	0.000137079	0.00419456	2.37731
AVL9	0.33476	0.000136965	0.00419877	2.37688
TRIM37	0.352922	0.000137903	0.0042044	2.3763
COL19A1	-0.3864	0.000136906	0.00420464	2.37627
AMACR	0.322814	0.000138449	0.00420575	2.37616
ABL2	0.359051	0.000138734	0.00420674	2.37605
POLE3	0.365973	0.000138243	0.0042071	2.37602
ATP5MF	0.356411	0.000136803	0.00420921	2.3758
HIGD2A	0.380491	0.000139283	0.00421578	2.37512
GALNT2	0.364501	0.00014027	0.00423797	2.37284
CHEK1	0.353003	0.000141372	0.00425591	2.37101
SLC66A3	0.381854	0.000141292	0.00426117	2.37047
SCRN1	0.385321	0.000141926	0.00426493	2.37009
AK2	0.349587	0.000142428	0.00427234	2.36933
PEX10	0.363211	0.000142973	0.00428101	2.36845
CEP55	0.352695	0.000143276	0.00428242	2.36831
CYC1	0.392074	0.000143809	0.00428305	2.36825
PDHB	0.386561	0.000145156	0.00428504	2.36804
NDUFB6	0.321225	0.000145008	0.00428825	2.36772
SDHD	0.339778	0.000143774	0.00428965	2.36758
SLC35B2	0.354994	0.000144956	0.0042943	2.36711
ACTR1A	0.330175	0.000144733	0.00429528	2.36701
VCX2	0.390087	0.000144612	0.00429931	2.3666
SNRPB	0.360856	0.000145941	0.00430063	2.36647
NANOS1	0.380407	0.00014656	0.00430374	2.36615
SSX1	0.381392	0.000146308	0.00430386	2.36614
PTPN9	0.311622	0.000148309	0.0043097	2.36555
PRRC2A	0.37143	0.00014705	0.00431054	2.36547
TUBGCP2	0.3798	0.00014823	0.00431492	2.36503
ZNF121	0.323167	0.000148012	0.00431608	2.36491
PRKAG2	0.385616	0.000147525	0.0043169	2.36483
NELFE	0.373962	0.000147834	0.00431839	2.36468
C1orf43	0.349239	0.000149653	0.00431879	2.36464
COPS6	0.373951	0.000149406	0.0043191	2.36461
SNX8	0.332264	0.000150467	0.00431992	2.36452
LPCAT3	0.31489	0.000149004	0.00432241	2.36427
ZNF384	0.371568	0.000149326	0.00432424	2.36409
DCAF6	0.343233	0.000150404	0.00432553	2.36396
EGLN1	0.365063	0.000150155	0.00432579	2.36393
PSMA7	0.348689	0.00015127	0.00433555	2.36296
PGAM1	0.311223	0.000152352	0.0043591	2.3606
KCNS3	0.362956	0.000154706	0.00441137	2.35543
TMEM173	0.378546	0.000154981	0.00441167	2.3554
COX11	0.329022	0.000154585	0.00441544	2.35503
PLPPR1	0.4063	0.000156302	0.0044267	2.35392
OXCT1	0.334351	0.00015612	0.00442905	2.35369
BRD8	0.326611	0.000155956	0.00443191	2.35341
TPRG1L	0.320419	0.000156767	0.00443236	2.35336
SLCO1A2	0.400514	0.000160572	0.00449442	2.34733
OR51M1	0.384528	0.000160348	0.00449565	2.34721
NDUFS8	0.352174	0.000159827	0.00449612	2.34716
TRMT112	0.310872	0.000160239	0.00450012	2.34678
ADAMTS20	0.398544	0.000159811	0.00450323	2.34648
ZNF106	0.327515	0.000161259	0.00450611	2.3462
PWP1	0.313263	0.000159807	0.0045107	2.34576
PIGBOS1	0.370674	0.000162354	0.00452913	2.34399
CCT5	0.324713	0.000163292	0.00454772	2.34221
TMEM87A	0.300505	0.000164235	0.00456639	2.34043
CDC23	0.304135	0.000165264	0.00457222	2.33987
ATP5F1E	0.334768	0.000166018	0.00457795	2.33933
TOR1AIP2	0.34716	0.000165208	0.00457824	2.3393
RPUSD3	0.331468	0.000165774	0.00457875	2.33925
NKAPD1	0.366258	0.000164963	0.00457903	2.33923
C4orf3	0.35366	0.000167837	0.00460535	2.33674
PPIB	0.363056	0.000167321	0.00460627	2.33665
WDR31	0.353402	0.000167632	0.00460728	2.33656
ATPSCKMT	0.334194	0.000169467	0.0046273	2.33467
POLR3C	0.343122	0.00016933	0.00463113	2.33431
SLBP	0.347393	0.000169065	0.00463144	2.33428
ZNF197	0.303284	0.000169919	0.00463208	2.33422
C1orf216	0.312585	0.000170357	0.00463647	2.33381
ZNF609	0.323548	0.000171856	0.00466968	2.33071
KLK2	0.380039	0.000172564	0.00468132	2.32963
IRF2BPL	0.34969	0.000173541	0.0047002	2.32788
AIMP2	0.333939	0.000175582	0.0047478	2.32351
TRAM1L1	0.401178	0.00017816	0.00476365	2.32206
NAB1	0.323602	0.000178158	0.00477121	2.32137
DDIAS	0.338078	0.000178978	0.00477789	2.32076
ARHGAP1	0.360254	0.00017813	0.00477811	2.32074
ZNF557	0.353977	0.000177638	0.00478022	2.32055
IQCH	0.349299	0.000177067	0.00478023	2.32055
CPA5	0.392264	0.000178033	0.00478317	2.32028
BYSL	0.299438	0.000177618	0.0047874	2.3199
TRAPPC4	0.319727	0.000180139	0.00480123	2.31865
CD48	0.344252	0.000181054	0.00481794	2.31714
FAM72D	0.354496	0.000181769	0.00482929	2.31612
TUBA1C	0.337494	0.000182635	0.00483693	2.31543
COA6	0.313146	0.000182355	0.00483718	2.31541
EIF1AD	0.357738	0.000185838	0.00488314	2.3113
CMTM6	0.309131	0.000184811	0.00488685	2.31097
APEX1	0.355771	0.000185823	0.00489042	2.31065
TASOR	0.337449	0.000185643	0.00489337	2.31039
GTF2A2	0.313725	0.000186524	0.00489347	2.31038
PTCH1	0.384209	0.000185492	0.00489711	2.31006
LSM7	0.409536	0.00018799	0.00492423	2.30766
MRPL9	0.386182	0.000188455	0.0049287	2.30727
OR56A1	0.394749	0.000191784	0.00499236	2.30169
CFAP99	0.370895	0.000191256	0.00499413	2.30154
TMEM245	0.331516	0.000191588	0.004995	2.30146
ACOT7	0.333079	0.000192903	0.00501368	2.29984
ANKRD27	0.35654	0.000195007	0.00502932	2.29849
ZDHHC12	0.382875	0.000194416	0.00502957	2.29847
ARL2	0.392141	0.000194792	0.00503153	2.2983
SEMA3D	0.364805	0.000194386	0.00503659	2.29786
NUP35	0.288322	0.000194332	0.005043	2.29731
WAPL	0.340002	0.000195879	0.00504404	2.29722
PQBP1	0.376671	0.000197498	0.00505461	2.29631
CERS2	0.377556	0.000196674	0.00505673	2.29613
MKI67	0.34637	0.000197429	0.0050606	2.2958
MRPS11	0.309168	0.000197175	0.00506183	2.29569
NDUFS1	0.323863	0.000198174	0.00506418	2.29549
MASTL	0.316112	0.000199158	0.00508157	2.294
RAD51	0.331577	0.000199723	0.00508822	2.29343
URM1	0.345002	0.00020382	0.00509186	2.29312
ANAPC7	0.349844	0.000202965	0.0050933	2.293
ALMS1	0.355374	0.00020358	0.00509345	2.29299
XRCC6	0.358366	0.000200342	0.00509624	2.29275
SNX22	0.316138	0.000203395	0.00509645	2.29273
EMC4	0.342575	0.00020288	0.00509881	2.29253
FARS2	0.302643	0.000201934	0.0051057	2.29194
PPM1B	0.351221	0.000202564	0.0051062	2.2919
SPG21	0.389597	0.000202879	0.00510645	2.29188
BCOR	0.366388	0.000202316	0.00510764	2.29178
DTL	0.351087	0.000201822	0.00511059	2.29153
COX5B	0.35084	0.000204972	0.00511299	2.29132
SOS1	0.355707	0.000201729	0.00511597	2.29107
LRRC8A	0.367524	0.000201455	0.00511677	2.291
RBM34	0.353399	0.000208453	0.00513101	2.2898
PSME1	0.346232	0.000206151	0.00513475	2.28948
ADGRV1	0.360355	0.000208388	0.00513697	2.28929
LCA5L	0.365491	0.000207943	0.00514113	2.28894
PAIP1	0.316197	0.000208371	0.00514412	2.28869
PFDN2	0.323201	0.000207855	0.00514655	2.28848
SLC25A33	0.337473	0.000206944	0.00514686	2.28846
NDUFS3	0.377008	0.000207843	0.00515389	2.28786
HID1	-0.319065	0.000207639	0.00515648	2.28765
TIPRL	0.35112	0.00021002	0.00516199	2.28718
LIN9	0.320968	0.000210751	0.00517236	2.28631
C6orf136	0.308922	0.000212239	0.00519366	2.28453
RECQL	0.342307	0.000212196	0.00520019	2.28398
TSACC	0.362096	0.000214403	0.00520852	2.28329
ZNF484	0.355626	0.000214861	0.0052121	2.28299
COPE	0.369375	0.000214252	0.00521242	2.28296
HPR	0.361217	0.000215304	0.00521528	2.28272
DPY30	0.359961	0.000213757	0.00521555	2.2827
MND1	0.30565	0.000213474	0.00521624	2.28264
RELA	0.365681	0.000214211	0.00521903	2.28241
HASPIN	0.324537	0.00021606	0.00522602	2.28183
SVOP	0.3737	0.000216391	0.00522648	2.28179
NUP210	0.368742	0.000216711	0.00522667	2.28177
ADSL	0.312564	0.000217353	0.00523462	2.28112
DMP1	0.385036	0.000219182	0.00527107	2.2781
DHPS	0.38628	0.000219771	0.00527765	2.27756
TTC9C	0.334352	0.000221142	0.00528028	2.27734
ARL3	0.332605	0.000220229	0.00528107	2.27728
TRIP4	0.344357	0.000220546	0.0052811	2.27728
HPRT1	0.331769	0.000223194	0.00528404	2.27703
PTTG1	0.326818	0.000222911	0.00528481	2.27697
XAGE5	0.393333	0.000221099	0.00528679	2.27681
WDR61	0.317216	0.000224651	0.00528861	2.27666
CRAT	0.372425	0.000224371	0.00528948	2.27659
DAP3	0.361752	0.00022281	0.00528992	2.27655
GLB1	0.360232	0.000224341	0.00529622	2.27603
PRR36	0.378333	0.000222782	0.00529678	2.27599
UTP15	0.340528	0.000222642	0.00530097	2.27564
ARHGAP28	0.360456	0.000224281	0.00530229	2.27554
SPINK5	0.345643	0.000222557	0.00530649	2.27519
CKAP5	0.354063	0.000227559	0.00534205	2.27229
SLC10A3	0.368642	0.000227294	0.00534333	2.27219
SHARPIN	0.358587	0.000229539	0.00537345	2.26975
SLC35C1	0.387567	0.00023054	0.00537435	2.26967
SUMO3	0.308873	0.000229439	0.00537865	2.26933
MFSD14B	0.304668	0.000230094	0.00537892	2.2693
THOC7	0.296822	0.000230495	0.0053808	2.26915
XPO1	0.331535	0.000232499	0.00540496	2.26721
UBE2J2	0.343313	0.00023235	0.00540901	2.26688
DKC1	0.354335	0.000233126	0.00541202	2.26664
BUD13	0.342325	0.000234088	0.00542682	2.26545
HNRNPAB	0.35895	0.000235678	0.00544106	2.26432
CISD1	0.303058	0.000238054	0.00544337	2.26413
DHTKD1	0.374193	0.000236176	0.00544506	2.264
CCDC24	0.375758	0.000235547	0.00544557	2.26396
COLEC10	0.36212	0.000238041	0.00545052	2.26356
TMEM97	0.3385	0.000235481	0.00545156	2.26348
PARK7	0.334377	0.000237923	0.00545527	2.26318
SHROOM3	0.366729	0.000237871	0.00546158	2.26268
MESD	0.31408	0.00023772	0.0054656	2.26236
DDB2	0.357248	0.000237403	0.00546581	2.26235
H2AFZ	0.34723	0.000239873	0.00547748	2.26142
HCFC1R1	0.350868	0.000240439	0.00548292	2.26099
HJURP	0.335186	0.00024155	0.00549329	2.26017
KIF19	-0.386558	0.00024261	0.00549501	2.26003
RAB10	0.34997	0.00024237	0.00549701	2.25987
MSH2	0.349544	0.000241517	0.00550003	2.25964
TBCE	0.313226	0.000242279	0.0055024	2.25945
CFAP47	0.355296	0.000244761	0.00553624	2.25679
PNRC2	0.25924	0.000245884	0.00555412	2.25538
CTSO	0.317973	0.000248563	0.00558449	2.25302
RAPH1	0.364196	0.00024799	0.00558661	2.25285
NUDT3	0.3299	0.000248415	0.00558866	2.25269
VPS33A	0.329496	0.000247766	0.0055891	2.25266
ILF2	0.363828	0.000250026	0.00560232	2.25163
FAM120AOS	0.345122	0.000249994	0.00560912	2.25111
UBAP2	0.353331	0.000252092	0.00562603	2.2498
NUP98	0.364659	0.000252078	0.00563322	2.24924
HSPA9	0.348369	0.000251756	0.00563355	2.24922
CENPK	0.277027	0.000253458	0.00564146	2.24861
TTL	0.322665	0.000253341	0.00564636	2.24823
ATP5MG	0.349629	0.000254045	0.00564702	2.24818
NEK2	0.292765	0.000255692	0.00567609	2.24595
GAGE1	0.393897	0.000256983	0.00568965	2.24491
TP53BP1	0.346047	0.000256904	0.00569545	2.24447
UFD1	0.317912	0.0002583	0.0056962	2.24441
PTPRR	0.380494	0.000258026	0.00569767	2.2443
HIBADH	0.300429	0.000260217	0.00570094	2.24405
AGBL5	0.308821	0.000259883	0.00570108	2.24404
NTAN1	0.333157	0.000257854	0.00570139	2.24402
KCTD9	0.337862	0.000259625	0.0057029	2.2439
TAF10	0.366598	0.000259386	0.00570512	2.24374
CSNK1G1	0.32391	0.000259279	0.00571029	2.24334
NUTM2E	0.353298	0.000261852	0.00572178	2.24247
SLC35E3	0.342453	0.000261648	0.0057248	2.24224
WDR92	0.321661	0.000264255	0.00575175	2.2402
RBMXL2	-0.376693	0.000263582	0.00575206	2.24018
CDH8	0.390207	0.000264791	0.00575593	2.23988
PANX1	0.343596	0.000264165	0.00575728	2.23978
SNRPD2	0.326788	0.000265636	0.00576681	2.23906
EIF4G2	0.355151	0.000266206	0.00577171	2.2387
CDHR4	0.371644	0.00026736	0.00578175	2.23794
ABI2	0.384412	0.000267308	0.0057881	2.23746
NSUN2	0.344522	0.000268441	0.00579764	2.23675
UHMK1	0.326126	0.000273643	0.0058872	2.23009
VMA21	0.299045	0.000273336	0.00588815	2.23002
NDUFA1	0.372574	0.000273073	0.00589007	2.22988
FANCC	0.355402	0.000275023	0.00590929	2.22846
PSMA2	0.262041	0.00027657	0.00591973	2.2277
CORO1C	0.35645	0.000276295	0.00592142	2.22757
APEH	0.334282	0.000275962	0.00592186	2.22754
KLHL25	0.33173	0.000277236	0.0059264	2.22721
SHISA5	0.316068	0.000277591	0.00592643	2.22721
GM2A	0.35085	0.000279188	0.00595292	2.22527
HSPE1	0.309002	0.000281014	0.00598424	2.22299
TTC32	0.345191	0.000281677	0.00599074	2.22252
RNFT1	0.328263	0.000283949	0.00600853	2.22123
BLOC1S6	0.356238	0.00028362	0.00600916	2.22119
NCK1	0.350465	0.000283495	0.00601411	2.22083
CDK7	0.251634	0.000283262	0.0060168	2.22063
LEO1	0.334219	0.000286567	0.00605626	2.2178
RAB7A	0.337461	0.000287365	0.00606547	2.21714
SETD3	0.324603	0.000290071	0.00611486	2.21361
ADAM29	0.381368	0.000292418	0.00614115	2.21175
RUSC1	0.375287	0.0002923	0.00614637	2.21138
TMEM106C	0.342948	0.000292045	0.00614874	2.21121
MRPL46	0.273741	0.000293191	0.00614967	2.21115
RPP30	0.30662	0.000294328	0.00615808	2.21055
RRM1	0.275	0.000294791	0.00616007	2.21041
SNF8	0.360329	0.00029431	0.0061654	2.21004
MIF	0.381525	0.000297025	0.00619901	2.20768
SLC25A36	0.327485	0.00029819	0.00620014	2.2076
NR1D2	0.332238	0.000297496	0.00620111	2.20753
EXOSC9	0.336997	0.000298061	0.00620515	2.20725
METTL21A	0.269989	0.000299396	0.00620977	2.20692
TET2	0.370338	0.000299293	0.00621534	2.20653
LCMT2	0.320659	0.000303158	0.0062491	2.20418
ERGIC1	0.365543	0.000302949	0.00625248	2.20395
GPX4	0.348466	0.000302281	0.00625412	2.20383
AP000781.2	-0.333252	0.00030197	0.00625541	2.20374
MRPS18C	0.261078	0.000302753	0.00625615	2.20369
MAST1	0.357301	0.000304911	0.0062775	2.20221
ANKRD16	0.341169	0.000306153	0.00627989	2.20205
SAP130	0.300659	0.0003061	0.00628651	2.20159
ETAA1	0.3045	0.000306011	0.0062924	2.20118
PMVK	0.323976	0.000308266	0.00631549	2.19959
CHMP4A	0.340039	0.000309025	0.0063233	2.19906
PIR	0.319364	0.000310356	0.00633504	2.19825
MUCL1	0.384933	0.000310015	0.00633581	2.1982
SLC24A2	0.362892	0.000311559	0.00635186	2.1971
GPR107	0.307597	0.000312951	0.00637247	2.19569
POP4	0.335901	0.000317581	0.00644324	2.1909
FBXW5	0.352041	0.000318079	0.00644552	2.19074
TMX2	0.30607	0.000317101	0.00644913	2.1905
ZPR1	0.3064	0.000317501	0.00644942	2.19048
POLD2	0.359458	0.000319592	0.00646836	2.18921
SNRPD1	0.26326	0.000323233	0.00652626	2.18534
ATOX1	0.339365	0.000322851	0.00652642	2.18532
PSMB2	0.344745	0.000325055	0.00655515	2.18342
CSK	0.35537	0.000327174	0.00655837	2.1832
DCAF16	0.32016	0.000325744	0.00656113	2.18302
DHX40	0.304379	0.00032715	0.00656575	2.18272
PRG3	-0.349501	0.00032693	0.00656922	2.18249
MRPL3	0.345061	0.000326774	0.00657396	2.18217
MYCBP	0.347208	0.000332473	0.00662492	2.17882
OR1J2	0.34894	0.000332318	0.00662972	2.17851
CFHR4	0.37227	0.000331154	0.00663021	2.17847
FUT11	0.303575	0.000332012	0.00663152	2.17839
APOOL	0.312098	0.000331639	0.00663198	2.17836
SGO1	0.308473	0.000334459	0.00663291	2.1783
AGMO	0.380933	0.000333288	0.00663326	2.17827
ABCF2	0.30008	0.000334238	0.0066364	2.17807
SPAG6	0.363338	0.000333883	0.00663721	2.17801
KHDRBS1	0.338293	0.000335691	0.00664947	2.17721
AMY2A	0.361119	0.000336706	0.00665382	2.17693
CNOT9	0.313247	0.000337693	0.00665761	2.17668
STMN1	0.317023	0.000336678	0.00666113	2.17645
NUP153	0.350269	0.000337679	0.00666518	2.17619
SUMO1	0.314264	0.000339929	0.0066781	2.17535
NSL1	0.345652	0.000339776	0.00668293	2.17503
PROX2	-0.347547	0.00033959	0.00668712	2.17476
GET3	0.371285	0.000343586	0.00671838	2.17274
PKD2L1	-0.347461	0.000342788	0.00671849	2.17273
RFT1	0.359251	0.000343436	0.00672331	2.17242
C2orf69	0.356527	0.000342786	0.00672633	2.17222
EIF2S1	0.314663	0.000344878	0.00673579	2.17161
UBE2T	0.323382	0.000345472	0.00673953	2.17137
UBE2Q1	0.349125	0.000346399	0.00674974	2.17071
PIN4	0.309561	0.000347266	0.00675876	2.17013
UQCRH	0.336454	0.000349355	0.00679153	2.16803
DYNLRB1	0.371763	0.000349832	0.00679292	2.16794
UBQLN1	0.343019	0.000351724	0.00682173	2.16611
SLC35B4	0.305635	0.000352618	0.00683116	2.16551
SWI5	0.270402	0.000353296	0.00683638	2.16517
SOHLH1	0.379778	0.00035413	0.00684461	2.16465
SMARCE1	0.334295	0.000357525	0.00690225	2.16101
AP1S1	0.343358	0.000358411	0.00691139	2.16043
SYNJ2BP	0.356511	0.000359541	0.00691724	2.16007
AHCTF1	0.37187	0.000359316	0.00692087	2.15984
LSM4	0.319289	0.000360942	0.00693622	2.15888
KIF4B	0.314781	0.000361451	0.00693803	2.15876
CTNNA2	0.331834	0.000362825	0.00694847	2.15811
GPR158	0.382631	0.000364008	0.0069552	2.15769
CAMSAP1	0.34081	0.000362778	0.00695553	2.15767
OR52L1	0.388417	0.000363774	0.00695869	2.15747
PPP2CB	0.272514	0.000367332	0.00701072	2.15424
TIMM21	0.315953	0.000371135	0.00701927	2.15371
UXS1	0.370776	0.000369181	0.00702199	2.15354
ZNF263	0.347981	0.000370885	0.00702248	2.15351
TTC13	0.266401	0.000368938	0.00702534	2.15333
ZNF93	0.309306	0.000370636	0.00702572	2.15331
ABRAXAS1	0.304673	0.0003698	0.00702579	2.15331
MRPL47	0.344753	0.000368616	0.00702722	2.15322
RFX7	0.33985	0.000372061	0.00702884	2.15312
PTBP3	0.287133	0.000370408	0.00702936	2.15308
KCTD3	0.316957	0.00037266	0.00703223	2.15291
ATP5F1C	0.302259	0.000374127	0.00705196	2.15169
SPTLC1	0.288743	0.000374926	0.00705906	2.15125
CNBP	0.335518	0.000376613	0.00707491	2.15028
PPP1R14B	0.355567	0.000376503	0.00708079	2.14992
ATP1B3	0.358238	0.000379614	0.00708358	2.14975
PAQR4	0.325109	0.000379388	0.00708727	2.14952
VPS28	0.360085	0.000377877	0.0070907	2.14931
EED	0.308714	0.000379363	0.00709473	2.14906
ZDHHC15	0.363178	0.000379007	0.007096	2.14899
TPTE	0.379801	0.000378602	0.00709635	2.14896
OCIAD2	0.314293	0.000381063	0.00710271	2.14858
CNP	0.3462	0.00038277	0.00712659	2.14712
ZKSCAN5	0.311192	0.000383797	0.00713777	2.14644
HSPA14	0.30419	0.000386116	0.00714122	2.14623
KLHL42	0.30911	0.000384997	0.00714422	2.14605
H3F3A	0.3222	0.000384704	0.00714671	2.14589
STRBP	0.322547	0.000386073	0.00714832	2.1458
SEMA3A	0.342209	0.000385675	0.00714887	2.14576
HESX1	0.326139	0.000390112	0.00719129	2.14319
CYP2C19	0.371128	0.000389764	0.00719281	2.1431
CD320	0.345542	0.000391182	0.00719517	2.14296
TIMM23	0.285177	0.00038949	0.00719568	2.14293
GRSF1	0.330964	0.000391018	0.00720007	2.14266
NAIF1	0.332614	0.000393174	0.00722387	2.14123
NARS	0.333963	0.000395178	0.00725273	2.1395
ABHD17B	0.31358	0.000396806	0.00727463	2.13819
MFAP1	0.342192	0.000399731	0.00732024	2.13547
SSB	0.348373	0.000400313	0.00732289	2.13532
NDUFB7	0.294863	0.000401514	0.00733684	2.13449
E2F2	0.329811	0.000404623	0.00737754	2.13209
ERH	0.274789	0.000404236	0.00737851	2.13203
RBBP5	0.314524	0.000405826	0.00739142	2.13127
TGIF2LX	0.345563	0.000406716	0.00739155	2.13126
ATIC	0.29623	0.000406334	0.00739262	2.1312
LRPPRC	0.336042	0.000408136	0.00739326	2.13116
OCIAD1	0.346872	0.000408081	0.00740028	2.13075
HSP90AB1	0.352017	0.000407984	0.00740655	2.13038
NMT2	0.377227	0.000409982	0.00741867	2.12967
NDUFB8	0.380211	0.00041149	0.00743793	2.12855
ZNF148	0.31513	0.000413405	0.00745644	2.12747
CLBA1	0.314175	0.000412996	0.00745709	2.12743
GRPEL1	0.279019	0.000415379	0.00748398	2.12587
HMGCR	0.37973	0.000416155	0.00748989	2.12552
SLC37A4	0.298498	0.000418779	0.00751288	2.12419
MRPS15	0.31048	0.000419363	0.00751531	2.12405
MIEF1	0.31372	0.000418509	0.00751609	2.12401
USP49	0.344604	0.000418499	0.007524	2.12355
MRPS23	0.318424	0.000420918	0.00753511	2.12291
PAIP2	0.277138	0.000421424	0.00753611	2.12285
EXO1	0.318794	0.000423671	0.00756014	2.12147
RIBC1	0.358866	0.000423354	0.00756255	2.12133
ENY2	0.296814	0.000429526	0.00765646	2.11597
GSTO1	0.32501	0.000432579	0.00770266	2.11336
KBTBD2	0.33971	0.000435689	0.00772517	2.11209
SNRPD3	0.293618	0.000435416	0.00772852	2.1119
ACAP2	0.339031	0.000435248	0.00773374	2.11161
AL139142.2	0.351789	0.000436663	0.00773425	2.11158
FAU	0.329453	0.00043494	0.00773647	2.11146
DPF2	0.34672	0.000437815	0.00773827	2.11136
RALBP1	0.333943	0.000437741	0.00774514	2.11097
NDUFA12	0.319524	0.000440031	0.00776925	2.10962
CLN6	0.354969	0.000442036	0.00779642	2.1081
HNRNPK	0.326481	0.000443454	0.00781319	2.10717
RAMAC	0.327817	0.000445079	0.00781713	2.10695
TM2D3	0.306165	0.000445752	0.00782074	2.10675
HADHB	0.322428	0.000446336	0.0078228	2.10664
PSMD13	0.338401	0.000445005	0.00782406	2.10657
INTS14	0.31746	0.000447922	0.00782602	2.10646
TSR3	0.350443	0.000447097	0.00782794	2.10635
DCAF8L1	0.35733	0.000447576	0.00782814	2.10634
TEX10	0.358859	0.000444903	0.00783048	2.10621
SLC17A9	-0.352718	0.000450379	0.00786073	2.10454
NDC1	0.311786	0.000450986	0.00786312	2.10441
DCAF17	0.331209	0.000454677	0.00789459	2.10267
STOML2	0.315746	0.000453376	0.00789658	2.10256
GSK3B	0.33404	0.000455452	0.00789985	2.10238
PMPCA	0.348042	0.000454074	0.00790052	2.10234
MEA1	0.31203	0.000454566	0.00790085	2.10233
RNF214	0.317489	0.000457596	0.00791245	2.10169
NDUFB10	0.344745	0.000460237	0.00791722	2.10143
USP28	0.331647	0.000457444	0.00791798	2.10139
STEAP1	0.353126	0.00045839	0.007918	2.10138
ETFA	0.344013	0.000460029	0.00792178	2.10118
TMEM237	0.319189	0.000457334	0.00792429	2.10104
EMC1	0.308492	0.000459711	0.00792446	2.10103
CTSF	0.360413	0.000459406	0.00792736	2.10087
PSMD10	0.301363	0.000461385	0.00792881	2.10079
RMND5A	0.35003	0.000463097	0.00795008	2.09963
HINT1	0.323262	0.000465921	0.00795774	2.09921
NPLOC4	0.34633	0.000465011	0.00795844	2.09917
VEZF1	0.323317	0.000464547	0.00795863	2.09916
CAST	0.344703	0.000465659	0.0079614	2.09901
BAD	0.327536	0.000464545	0.00796675	2.09872
STN1	0.307224	0.000467354	0.00797408	2.09832
HSPA4	0.294015	0.000470579	0.00802093	2.09578
DPAGT1	0.341518	0.000471872	0.00802662	2.09547
LTA4H	0.336283	0.000471607	0.00803028	2.09527
NCEH1	0.250677	0.000472853	0.00803513	2.09501
CSTB	0.335513	0.000473398	0.00803624	2.09495
FOSB	-0.319394	0.00047437	0.00804458	2.0945
PGK1	0.335351	0.000476297	0.00806908	2.09318
GPKOW	0.296572	0.000478848	0.0081041	2.0913
ZMPSTE24	0.29802	0.000480327	0.00810455	2.09127
AP3M1	0.359126	0.000480126	0.00810934	2.09101
DMRTC1	-0.33138	0.000481369	0.00811395	2.09077
TOR1AIP1	0.350993	0.000480078	0.00811672	2.09062
MMACHC	0.31812	0.00048525	0.00813838	2.08946
FAM111A	0.313721	0.000485097	0.00814398	2.08916
GPN3	0.304292	0.000484221	0.00814562	2.08908
BRK1	0.292384	0.000483761	0.00814607	2.08905
CTAG1A	0.392569	0.000484895	0.00814876	2.08891
AC244197.3	0.315526	0.000486665	0.00815396	2.08863
ZNF592	0.328156	0.000489274	0.00818946	2.08674
BAG2	0.325131	0.000493183	0.00821383	2.08545
ADGRL3	0.347532	0.000491263	0.00821454	2.08542
CD99L2	0.347752	0.000493934	0.00821815	2.08523
PRDM5	0.345923	0.000492014	0.00821889	2.08519
PDCD5	0.335003	0.0004931	0.00822062	2.0851
SCOC	0.305856	0.000492694	0.00822204	2.08502
IMMT	0.29896	0.000494916	0.00822632	2.08479
HIST1H2AC	0.300337	0.000497259	0.00825706	2.08317
IREB2	0.320022	0.000498689	0.0082726	2.08236
TMEM9	0.324408	0.000500217	0.00828974	2.08146
PRDX5	0.302879	0.000502311	0.0082916	2.08136
COMMD1	0.300202	0.000503623	0.00829689	2.08108
ATRAID	0.332651	0.000502136	0.0082969	2.08108
MECP2	0.346191	0.000501718	0.00829818	2.08102
KNL1	0.301725	0.000501448	0.00830192	2.08082
SAR1A	0.316673	0.000503492	0.0083029	2.08077
TARDBP	0.278805	0.000506559	0.00833705	2.07899
REEP2	0.358056	0.000510317	0.00834964	2.07833
NAALADL2	0.337776	0.000508606	0.00835432	2.07809
PSG11	0.356221	0.000509761	0.00835689	2.07796
SMC1B	0.35282	0.000510265	0.00835696	2.07795
GCDH	0.337023	0.00050831	0.00835765	2.07792
UBE2I	0.270191	0.000511375	0.00835878	2.07786
OR51B4	0.361721	0.000509707	0.00836419	2.07758
SMC2	0.331266	0.000515605	0.0084197	2.0747
ZC3H3	0.339076	0.000516946	0.00843337	2.074
TRAPPC3	0.319013	0.00051865	0.00845293	2.07299
LLPH	0.308952	0.000520957	0.00848227	2.07149
TPMT	0.308834	0.000521811	0.00848792	2.0712
RAC2	0.330117	0.00052538	0.00852941	2.06908
AMN	-0.37299	0.000525155	0.00853402	2.06885
THOC5	0.34305	0.000527168	0.00855013	2.06803
BDH2	0.309061	0.000528802	0.00856833	2.0671
MCRIP2	0.336416	0.000529649	0.00857376	2.06683
AGTPBP1	0.314894	0.000531268	0.00858336	2.06634
PRC1	0.317611	0.00053123	0.00859104	2.06595
RNF19B	0.323473	0.00053287	0.00859266	2.06587
RNF26	0.292965	0.00053351	0.0085947	2.06577
PLRG1	0.283281	0.000532601	0.0085966	2.06567
RHEB	0.308189	0.000534964	0.00860983	2.06501
SMPX	0.352474	0.000538571	0.00863467	2.06375
AURKA	0.321958	0.000538476	0.00864142	2.06341
NUDT16	0.32219	0.000537548	0.00864311	2.06333
SNX9	-0.34272	0.000538115	0.00864392	2.06329
TXNL1	0.306494	0.000542271	0.00868567	2.0612
PICALM	0.326979	0.000545598	0.00868907	2.06103
MCCC2	0.308548	0.000546406	0.00869368	2.0608
SLC25A13	0.30719	0.00054552	0.0086961	2.06068
TSG101	0.292605	0.00054463	0.00869849	2.06056
SAMD1	0.338124	0.000544137	0.00869891	2.06054
ETV1	0.339173	0.0005454	0.00870248	2.06036
PI4KB	0.331737	0.000544093	0.00870652	2.06016
MRPS22	0.32098	0.00054789	0.008709	2.06003
MRPL41	0.304139	0.000552564	0.00876665	2.05717
DSTYK	0.318779	0.000553754	0.0087689	2.05705
RETSAT	0.297915	0.00055231	0.00877094	2.05695
GABPB2	0.303589	0.000553404	0.00877166	2.05692
H1FX	0.341044	0.000554698	0.00877555	2.05673
ARHGAP11A	0.297586	0.000555804	0.00878474	2.05627
MED28	0.270536	0.000557221	0.00879884	2.05557
C19orf53	0.325645	0.00055852	0.00881103	2.05497
PEX16	0.321227	0.000559122	0.00881223	2.05491
PARD6A	0.293149	0.00056202	0.00884125	2.05349
HECW1	0.357774	0.000562003	0.0088493	2.05309
TMPO	0.323432	0.000565381	0.00888577	2.05131
RAB5IF	0.328943	0.000570001	0.00889989	2.05062
KNSTRN	0.293407	0.000569824	0.00890543	2.05035
UNC13C	0.373325	0.000569347	0.00890629	2.0503
TUSC3	0.348335	0.000567493	0.00891059	2.05009
HIPK3	0.334625	0.000569194	0.00891222	2.05001
FAM161A	0.34544	0.000569137	0.00891968	2.04965
COX6B1	0.292799	0.00056903	0.00892636	2.04933
DPP3	0.298528	0.0005724	0.00892902	2.0492
ICK	0.32875	0.000573515	0.00893807	2.04876
TPRA1	0.338162	0.000575669	0.0089633	2.04753
CHAF1B	0.308448	0.000580038	0.00898952	2.04626
CCT7	0.367205	0.000577946	0.00899038	2.04622
ZSCAN16	0.32723	0.000580685	0.00899121	2.04618
MRPL14	0.293228	0.000579287	0.00899453	2.04602
KBTBD3	0.325504	0.000579968	0.00899676	2.04591
SLC25A1	0.331223	0.000578953	0.00899769	2.04587
PHACTR4	0.295193	0.000582116	0.00900505	2.04551
MAP7D3	0.297152	0.000583497	0.00900975	2.04529
MSRA	-0.352201	0.000585264	0.0090121	2.04517
ECI1	0.333423	0.000583251	0.00901427	2.04507
EIF6	0.305314	0.000584903	0.00901483	2.04504
MUC7	0.334743	0.000584697	0.00901997	2.0448
RPRD1A	0.294722	0.000588137	0.00904801	2.04345
HINT2	0.329653	0.000595453	0.00915214	2.03848
OR1N2	0.336917	0.000596128	0.00915412	2.03838
PRELID1	0.340552	0.000598889	0.00918808	2.03678
GFM1	0.334439	0.000601598	0.00921277	2.03561
PRPS1	0.304627	0.000601203	0.00921515	2.0355
ZNF670	0.325232	0.000603859	0.00923893	2.03438
IQCA1	0.340393	0.000606992	0.00927839	2.03253
NME2	0.321431	0.000607607	0.00927931	2.03248
ASPM	0.310133	0.000612158	0.0093403	2.02964
TUBA1B	0.315747	0.000613672	0.00934635	2.02936
MPV17	0.293366	0.0006143	0.00934741	2.02931
SNRPE	0.291534	0.000613633	0.00935428	2.02899
DNAH8	-0.35257	0.000616697	0.00937537	2.02801
DNAAF4	0.3408	0.000617654	0.00938138	2.02773
ST6GALNAC5	0.371166	0.000619392	0.00939925	2.02691
ERMP1	0.287692	0.000622092	0.00943169	2.02541
NIT2	0.304226	0.000623096	0.00943836	2.0251
OR1J1	0.336855	0.000624528	0.00944295	2.02489
PLGRKT	0.299788	0.000624073	0.00944461	2.02482
MFAP2	0.34101	0.000626177	0.00945934	2.02414
RPH3AL	-0.355229	0.000626771	0.00945977	2.02412
SRA1	0.33494	0.000629693	0.00949531	2.02249
CBX3	0.334474	0.000630612	0.00950061	2.02225
APPL1	0.33535	0.000631514	0.00950565	2.02202
MARK2	0.342288	0.000632611	0.00951361	2.02165
MICOS10	0.266877	0.000636585	0.00955619	2.01972
POLQ	0.297306	0.000638432	0.00955821	2.01962
SUV39H1	0.305877	0.000636261	0.0095599	2.01955
RNF157	0.326901	0.000638423	0.00956664	2.01924
GINS1	0.319883	0.00063833	0.00957381	2.01892
HSF2BP	0.332592	0.000642912	0.00959953	2.01775
HNRNPCL2	0.341244	0.00064267	0.00960447	2.01753
CCDC181	0.336734	0.000642194	0.00960594	2.01746
WDR83OS	0.304845	0.000646558	0.00963676	2.01607
BBS4	0.32026	0.000646423	0.00964334	2.01577
EPX	-0.337659	0.000647634	0.00964421	2.01573
GNL2	0.298566	0.000648755	0.00965232	2.01537
TTBK2	0.298791	0.000652631	0.00966702	2.01471
NAA11	0.381089	0.000653839	0.0096678	2.01467
AGO2	0.332122	0.000650398	0.00966817	2.01466
SENP8	0.311089	0.000651717	0.0096706	2.01455
ACSL3	0.320306	0.00065131	0.00967313	2.01443
CAMLG	0.306287	0.000653675	0.00967393	2.0144
ARMC8	0.312976	0.000652538	0.00967421	2.01438
HYAL2	0.329628	0.000656903	0.00968744	2.01379
GIPC1	0.333163	0.000656471	0.0096896	2.01369
FOXJ3	0.304612	0.00065623	0.0096946	2.01347
PRPS2	0.277387	0.000658298	0.00969947	2.01325
ATPAF1	0.322316	0.000659728	0.00970345	2.01307
ATP5MC3	0.336051	0.000659474	0.00970825	2.01286
PON2	0.299426	0.000660676	0.00970886	2.01283
HIST1H1E	0.316327	0.00066327	0.00972137	2.01227
CBR4	0.309954	0.000662998	0.00972591	2.01207
SPA17	0.314019	0.000664404	0.00972948	2.01191
TRUB2	0.302255	0.000662684	0.00972983	2.01189
YRDC	0.278582	0.00066585	0.00974213	2.01135
PRELID3B	0.273186	0.000669554	0.00978776	2.00932
NGRN	0.272837	0.000671745	0.00980267	2.00866
KNOP1	0.330734	0.000671296	0.00980467	2.00857
CHURC1	0.297276	0.000675112	0.00984323	2.00686
HDGF	0.326404	0.000679417	0.00989738	2.00448
LAMC2	0.332964	0.000680219	0.00990044	2.00435
SIX1	0.346272	0.000683658	0.00994185	2.00253
MRPL2	0.357589	0.000685211	0.00994715	2.0023
MMADHC	0.319377	0.00068513	0.00995461	2.00198
ATP6V1E1	0.345409	0.000689315	0.00999806	2.00008
CALHM2	0.335528	0.000691053	0.0100146	1.99937
SPATS2L	0.301698	0.000693564	0.0100336	1.99854
ISCU	0.32114	0.000693438	0.0100405	1.99825
MAN2B1	0.332122	0.000696217	0.0100546	1.99764
TRIM42	0.342639	0.000696125	0.0100619	1.99732
LRRC42	0.309179	0.000697388	0.0100628	1.99728
FNIP2	0.322531	0.000699499	0.0100759	1.99672
PPIG	0.342911	0.000699343	0.0100823	1.99644
SSNA1	0.286082	0.000703975	0.0101317	1.99432
INTS2	0.280532	0.000704676	0.010133	1.99426
SYNGAP1	0.339103	0.000705798	0.0101405	1.99394
C11orf24	0.330846	0.000711835	0.0101575	1.99322
MRPL55	0.342327	0.000707883	0.0101617	1.99303
VSX1	0.335396	0.000711153	0.0101651	1.99289
PLSCR1	0.308739	0.000711829	0.010166	1.99285
GAR1	0.300152	0.00071076	0.0101681	1.99276
RPS10	0.314594	0.000709568	0.0101685	1.99275
CRACR2A	-0.356673	0.000710406	0.0101718	1.9926
PEA15	0.324315	0.000709262	0.0101728	1.99256
IFI30	0.314423	0.000713786	0.0101766	1.9924
GUK1	0.333778	0.000716046	0.0101915	1.99176
PPM1G	0.329218	0.000716794	0.0101935	1.99168
ZNF367	0.322247	0.000715738	0.0101958	1.99158
INTS7	0.281185	0.000718661	0.0102113	1.99092
SLC39A3	0.308722	0.00072123	0.0102391	1.98974
ARPP19	0.345886	0.00072483	0.0102815	1.98794
ATP5IF1	0.305136	0.000726703	0.0102907	1.98756
BLOC1S1	0.321868	0.000726651	0.0102986	1.98722
SMARCC1	0.336526	0.000729058	0.0103153	1.98652
PPP2R2C	0.328996	0.000730156	0.0103221	1.98623
ZNF561	0.358227	0.000731856	0.0103374	1.98559
PDCD10	0.319093	0.00073287	0.010343	1.98535
RRP9	0.31632	0.000734794	0.0103527	1.98495
SDHB	0.319043	0.000734655	0.0103594	1.98466
NIFK	0.297065	0.000737931	0.0103881	1.98346
PRKCSH	0.332035	0.000740698	0.0104183	1.9822
PSMA5	0.280513	0.000743934	0.0104551	1.98067
ABCE1	0.316604	0.000745427	0.0104672	1.98017
SEH1L	0.304995	0.000747376	0.0104858	1.9794
MAGEB2	0.358467	0.000749051	0.0105005	1.97879
TMX1	0.302484	0.000755143	0.0105155	1.97817
COX7C	0.271472	0.000751091	0.0105203	1.97797
POLR2G	0.305664	0.000754916	0.0105211	1.97794
SMIM19	0.30759	0.000751943	0.0105234	1.97784
TSNAX	0.301123	0.000754819	0.0105285	1.97763
SUCLG1	0.26693	0.000754303	0.01053	1.97757
SHC1	0.351482	0.000753704	0.0105305	1.97755
RRP15	0.300132	0.00075337	0.0105346	1.97738
RAB36	0.319607	0.000760085	0.0105755	1.9757
IFI6	0.319308	0.000764119	0.0106228	1.97376
CALB1	0.347523	0.000765983	0.0106398	1.97306
OSGEPL1	0.288291	0.00076683	0.0106428	1.97294
DNAJB12	0.32571	0.000768792	0.0106435	1.97291
ZNF823	0.291052	0.000768488	0.0106481	1.97273
ELANE	-0.312519	0.000770066	0.0106524	1.97255
RARS	0.351053	0.000768249	0.0106536	1.9725
OR56B4	0.351939	0.000774135	0.0106646	1.97206
MSANTD3-TMEFF1	0.329023	0.000775004	0.0106678	1.97193
SETD9	0.274528	0.000773845	0.0106694	1.97186
DNA2	0.283908	0.000775779	0.0106697	1.97185
KIFC1	0.295768	0.000776472	0.0106704	1.97182
NDUFC2	0.274521	0.000773356	0.0106714	1.97178
EDF1	0.335332	0.000772927	0.0106743	1.97166
FAM222A	0.332923	0.000772338	0.010675	1.97163
PCNA	0.29885	0.000780268	0.0107138	1.97006
MRPL11	0.27644	0.000781023	0.0107154	1.96999
NUP155	0.263005	0.000781792	0.0107171	1.96992
COX7A2	0.274955	0.000786069	0.0107318	1.96933
PSMB3	0.338178	0.000786002	0.0107397	1.96901
MCL1	0.306988	0.000785556	0.0107424	1.9689
VDAC1	0.346664	0.000785442	0.0107496	1.96861
RPS10-NUDT3	0.33599	0.000785032	0.0107528	1.96848
TADA3	0.320938	0.000792695	0.0107871	1.9671
EPHX1	0.324749	0.000796921	0.010792	1.9669
PIN1	0.297529	0.00079116	0.0107925	1.96688
CCNY	0.326819	0.000792658	0.0107954	1.96676
GNPTAB	0.32288	0.000796644	0.0107969	1.9667
ALDH4A1	0.284491	0.000796074	0.010798	1.96666
KLF13	0.307366	0.000792606	0.0108035	1.96644
SKAP2	0.302009	0.000798473	0.0108042	1.96641
FAM72C	0.320472	0.000796042	0.0108063	1.96632
COX7A2L	0.29099	0.000794824	0.0108073	1.96628
BAX	0.320501	0.000795507	0.0108078	1.96626
CTAG2	0.339863	0.00080006	0.010817	1.96589
FAM168B	0.286054	0.000803372	0.010853	1.96445
BVES	0.331819	0.000805384	0.0108714	1.96371
ABCB6	0.349225	0.000807292	0.0108884	1.96304
AUP1	0.345612	0.000809835	0.0109051	1.96237
GPR137	0.301611	0.000809736	0.0109125	1.96207
CSRP1	0.332548	0.000811621	0.0109203	1.96176
RFXANK	0.316167	0.000815104	0.0109584	1.96025
RWDD2B	0.295048	0.000816283	0.0109655	1.95997
ENOX2	0.345162	0.00081872	0.0109894	1.95903
MKKS	0.28396	0.000821354	0.0109895	1.95902
COPA	0.338735	0.000820993	0.0109934	1.95887
MDGA2	0.347194	0.000820789	0.0109995	1.95863
GALK1	0.284203	0.000820374	0.0110027	1.9585
SPTY2D1	0.330248	0.000829279	0.011025	1.95762
C12orf57	0.336049	0.000828962	0.0110295	1.95744
DAZAP1	0.325162	0.000825025	0.0110298	1.95743
UHRF1BP1L	0.303594	0.00082579	0.0110312	1.95738
DTX3L	0.328962	0.000828052	0.011035	1.95723
SP4	0.286244	0.000828804	0.0110362	1.95718
XAGE3	0.35891	0.000826869	0.0110368	1.95716
MAGEA2	0.36137	0.000827657	0.0110385	1.95709
CEP41	0.29621	0.000832139	0.0110455	1.95682
AVEN	0.30835	0.000832089	0.0110536	1.9565
CTSA	0.332695	0.000834902	0.0110558	1.95641
FDXACB1	0.322101	0.000834499	0.0110593	1.95627
MUL1	0.33324	0.000836044	0.0110622	1.95616
PSMD1	0.329153	0.000834412	0.0110669	1.95598
POLR2H	0.287774	0.000840541	0.0111129	1.95417
SPOCK3	0.339659	0.000844362	0.0111195	1.95391
HERC4	0.287354	0.000845715	0.0111199	1.9539
ENPP4	0.31822	0.00084381	0.011121	1.95386
ECD	0.286938	0.000845178	0.0111215	1.95384
ARV1	0.2892	0.00084263	0.011123	1.95378
MLLT11	0.324173	0.000843488	0.0111255	1.95368
C11orf1	0.324702	0.000842258	0.0111269	1.95363
MRPL17	0.276188	0.000848055	0.0111419	1.95304
OTUD7B	0.308332	0.000858575	0.0112624	1.94837
PUF60	0.334208	0.000858304	0.0112677	1.94817
MRTO4	0.309775	0.000861076	0.0112864	1.94745
NCALD	0.29223	0.000861855	0.0112877	1.94739
MTHFD1	0.313239	0.000863303	0.0112979	1.947
PSMB5	0.289866	0.000864101	0.0112995	1.94694
IER3IP1	0.306702	0.00086714	0.0113304	1.94576
CDK9	0.329034	0.000869686	0.0113548	1.94482
VPS25	0.299394	0.000877134	0.0113987	1.94315
RDH14	0.286928	0.000873766	0.0113991	1.94313
C1D	0.283097	0.000877998	0.011401	1.94306
EXOSC10	0.332471	0.000876705	0.0114019	1.94302
RHOA	0.313111	0.00087647	0.0114077	1.9428
ZFP1	0.310973	0.000876109	0.0114119	1.94264
BLMH	0.287746	0.000879749	0.0114149	1.94253
GPATCH4	0.339565	0.000875688	0.0114153	1.94251
NDUFA6	0.319753	0.00088079	0.0114196	1.94235
WDR12	0.288724	0.000883022	0.0114396	1.94159
RNF7	0.266129	0.000889736	0.0114645	1.94064
MICB	0.301757	0.000886678	0.0114693	1.94046
C18orf54	0.290126	0.000890806	0.0114695	1.94046
RANBP1	0.325672	0.000888078	0.0114696	1.94045
SORCS1	0.337294	0.000889456	0.0114697	1.94045
ERI3	0.294483	0.000887415	0.0114699	1.94044
NLN	0.318609	0.000886239	0.0114724	1.94034
COMMD5	0.283581	0.000889185	0.0114751	1.94024
PAGE1	0.342096	0.000892967	0.0114885	1.93974
PGD	0.311071	0.000895104	0.0114983	1.93937
HOMEZ	0.257472	0.00089449	0.0114992	1.93933
LAMTOR2	0.306548	0.00090006	0.0115354	1.93797
SCN7A	0.328288	0.000899636	0.0115388	1.93784
WDR35	0.320145	0.000899412	0.0115447	1.93762
FAM47E-STBD1	0.340053	0.000902587	0.0115589	1.93708
GANAB	0.320348	0.000905184	0.0115833	1.93617
S100A16	0.330304	0.00090727	0.0115923	1.93583
EDN1	0.326589	0.000907195	0.0116002	1.93554
PLEKHA3	0.301615	0.000909177	0.0116078	1.93525
KIF3B	0.317742	0.000910709	0.0116185	1.93485
DHX9	0.312286	0.000913221	0.011624	1.93465
RANBP9	0.327094	0.000913125	0.0116316	1.93436
ILRUN	0.297721	0.000912523	0.0116328	1.93432
PIK3R4	0.278123	0.000916538	0.0116573	1.9334
TAF12	0.308039	0.000921286	0.0117088	1.93149
NIBAN3	-0.328996	0.000923773	0.0117315	1.93065
LAMP2	0.309599	0.000925023	0.0117385	1.93039
CCDC47	0.335046	0.000926122	0.0117435	1.9302
IQSEC1	0.33918	0.000928246	0.0117615	1.92954
NUDCD2	0.286846	0.000929867	0.0117643	1.92944
API5	0.309771	0.000929325	0.0117663	1.92936
ARNT	0.317538	0.000932119	0.0117838	1.92871
PYGO2	0.261232	0.00093321	0.0117887	1.92853
ARPC5	0.306272	0.000937271	0.0118311	1.92697
TRIM27	0.325778	0.0009423	0.0118856	1.92498
HEATR5A	0.293015	0.000946053	0.0118882	1.92489
C3orf38	0.327044	0.00094546	0.0118896	1.92483
RPL27	0.300389	0.000943364	0.0118901	1.92482
ADA	0.309137	0.00094493	0.0118919	1.92475
C1orf53	0.313331	0.000947093	0.0118923	1.92473
TBCB	0.336483	0.000944472	0.0118951	1.92463
KLF10	0.294352	0.000948327	0.0118989	1.92449
TMEM205	0.280098	0.000954388	0.0119302	1.92335
ELK1	0.328177	0.0009518	0.0119335	1.92323
TMEM189	0.292833	0.000954298	0.011938	1.92307
SUGP1	0.313241	0.00095382	0.0119409	1.92296
PARL	0.355498	0.000953584	0.0119469	1.92274
DHRS4	0.253278	0.000957376	0.0119497	1.92264
RPL35	0.307152	0.000956818	0.0119517	1.92257
NAA15	0.330373	0.000958889	0.0119597	1.92228
MRPL19	0.297924	0.000960602	0.0119721	1.92183
MED18	0.30051	0.000964321	0.0119828	1.92144
ALG8	0.309434	0.000963045	0.0119847	1.92137
CBWD1	0.283594	0.000964226	0.0119905	1.92116
GRN	0.323326	0.000962924	0.0119921	1.9211
ATP6AP2	0.312022	0.000966576	0.0120019	1.92075
RBM14	0.298538	0.000968629	0.0120096	1.92047
CDKN3	0.284999	0.000969388	0.0120101	1.92045
TMEM184B	0.337112	0.000968092	0.0120118	1.92039
INVS	0.320469	0.000970891	0.0120198	1.9201
EMC7	0.299909	0.000979214	0.0120515	1.91896
IMP4	0.33228	0.000978631	0.0120532	1.9189
TAF2	0.320217	0.000978196	0.0120567	1.91877
PECAM1	0.354485	0.000976955	0.0120592	1.91868
SCAF4	0.317695	0.0009777	0.0120595	1.91867
ELOVL5	0.280889	0.000982669	0.0120674	1.91838
PPP2R3C	0.284233	0.000976945	0.012068	1.91837
TMEM164	0.317088	0.000976327	0.0120692	1.91832
COP1	0.30787	0.000975642	0.0120697	1.9183
ERF	0.269744	0.000982505	0.0120743	1.91814
POP7	0.326215	0.000983964	0.0120745	1.91813
IER5L	0.328803	0.000982014	0.0120771	1.91804
CNIH1	0.30524	0.000987951	0.0121056	1.91701
SHC4	0.325231	0.000987619	0.0121105	1.91684
TMEM50A	0.325224	0.000992877	0.0121128	1.91676
MCF2L	-0.350171	0.000990046	0.0121136	1.91673
WDR73	0.329594	0.000992568	0.0121179	1.91657
INSYN1	-0.313708	0.000994763	0.0121182	1.91656
VPS45	0.253613	0.000989718	0.0121184	1.91655
DPH2	0.289628	0.000995715	0.0121209	1.91646
SPRR2D	0.361659	0.000992106	0.0121211	1.91646
RMI2	0.308335	0.00099433	0.0121217	1.91644
PHB2	0.311407	0.000991683	0.0121248	1.91633
MCUB	0.266251	0.000998157	0.0121418	1.91572
PM20D2	0.333988	0.0010013	0.0121447	1.91561
FXYD1	0.331736	0.0010012	0.0121523	1.91534
PCBD2	0.259749	0.00100063	0.0121543	1.91527
TNFRSF6B	0.327229	0.00100309	0.0121576	1.91515
EIF3I	0.274924	0.00100018	0.0121576	1.91515
AL133353.2	0.292589	0.00100547	0.01216	1.91506
NQO1	0.294824	0.00100628	0.0121611	1.91503
YBEY	0.291618	0.00100415	0.0121617	1.91501
MESP2	0.330418	0.00100507	0.0121641	1.91492
NDUFV2	0.281424	0.00100894	0.0121844	1.9142
MRE11	0.317993	0.00101177	0.0122099	1.91329
TOR1B	0.285797	0.00101363	0.0122147	1.91312
STPG1	0.311645	0.00101315	0.0122177	1.91301
ASAH2	0.321225	0.0010168	0.0122264	1.9127
RNPEP	0.319369	0.00101542	0.0122274	1.91267
RAD21	0.31157	0.00101675	0.0122346	1.91241
JKAMP	0.306466	0.00102597	0.0122662	1.91129
TNFAIP8L1	0.320909	0.00102172	0.012268	1.91123
ZNF184	0.294751	0.00102113	0.0122697	1.91117
PPP1R1C	0.351169	0.00102571	0.0122718	1.91109
LSM2	0.279906	0.00102866	0.012272	1.91108
LZTFL1	0.262844	0.00102504	0.0122726	1.91106
CWC15	0.298893	0.00102738	0.0122742	1.91101
UNG	0.320877	0.00102821	0.0122755	1.91096
NDUFA10	0.336658	0.00102467	0.012277	1.91091
QTRT2	0.290078	0.00102343	0.0122797	1.91081
RAP2C	0.317264	0.0010242	0.0122801	1.9108
ZNRF3	0.297719	0.00103296	0.0123146	1.90958
SNAP47	0.331573	0.00103647	0.0123213	1.90934
TSHZ2	-0.352245	0.00103613	0.012326	1.90918
ASB5	0.342397	0.00103564	0.012329	1.90907
FAAP20	0.329998	0.00103539	0.0123348	1.90887
FBXO22	0.284187	0.00104084	0.0123469	1.90844
CCDC113	0.325301	0.00104039	0.0123504	1.90832
WDHD1	0.288781	0.00104	0.0123545	1.90817
H1FNT	0.329335	0.00104333	0.0123677	1.90771
WBP2	0.318853	0.00105076	0.012447	1.90494
ERAP1	0.317385	0.00105352	0.0124709	1.9041
ZMAT2	0.313847	0.0010572	0.0124879	1.90351
PSMA6	0.275481	0.00105572	0.0124881	1.9035
HADHA	0.313132	0.00105649	0.0124883	1.9035
ELAVL1	0.330688	0.00106324	0.0125415	1.90165
HDHD3	0.294128	0.00106251	0.0125419	1.90164
VEGFB	0.339328	0.00106523	0.0125473	1.90145
RASD1	-0.347972	0.00106458	0.0125485	1.90141
HPS3	0.299526	0.00106687	0.0125578	1.90109
TBCA	0.267102	0.00107411	0.0126076	1.89937
LPCAT1	0.322078	0.00107591	0.012611	1.89925
SLF2	0.305701	0.00107532	0.012613	1.89918
TBX4	0.325689	0.00107399	0.0126151	1.89911
EXOC2	0.306956	0.00107399	0.0126239	1.89881
MRPL13	0.282841	0.00107348	0.0126267	1.89871
TIMM10	0.286688	0.00107884	0.0126277	1.89868
MAP1A	0.338533	0.00107966	0.0126285	1.89865
LMAN2	0.320126	0.00107858	0.0126335	1.89848
EDEM3	0.324767	0.00108342	0.0126547	1.89775
PIAS1	0.300629	0.0010847	0.0126609	1.89754
PRKAG1	0.297901	0.00108325	0.0126616	1.89751
TXNDC9	0.277207	0.00109815	0.0127823	1.89339
KIF2A	0.316627	0.00109591	0.0127828	1.89337
CRTC2	0.318286	0.00110059	0.0127839	1.89334
CUEDC2	0.319405	0.0010976	0.0127847	1.89331
TESMIN	0.308947	0.00109688	0.0127853	1.89329
SMC3	0.322414	0.00109945	0.0127885	1.89318
METTL2A	0.345719	0.00110053	0.0127922	1.89306
TARBP2	0.298356	0.00110357	0.0128097	1.89246
NDUFA7	0.288214	0.00111198	0.0128716	1.89037
FAT1	0.326593	0.00111088	0.0128766	1.8902
ZNF443	0.317795	0.00111197	0.0128803	1.89007
TRIM5	0.315568	0.0011108	0.0128846	1.88993
CSE1L	0.292528	0.00111807	0.0129242	1.88859
SUPT3H	0.264407	0.00111754	0.012927	1.8885
BTBD1	0.291783	0.00112624	0.0129649	1.88723
ATXN3	0.27399	0.00112598	0.0129708	1.88703
PPP3R1	0.285582	0.00112586	0.0129784	1.88678
AMMECR1L	0.328702	0.00112357	0.0129789	1.88676
AD000671.2	0.320801	0.00112518	0.0129795	1.88674
FAM47A	0.322266	0.00112917	0.0129808	1.8867
RETREG3	0.340535	0.00112461	0.0129819	1.88666
UBA52	0.310693	0.00112893	0.012987	1.88649
PFKM	0.317705	0.00113329	0.0129925	1.88631
METTL14	0.25367	0.00113305	0.0129986	1.8861
CCDC34	0.294739	0.00113238	0.0129999	1.88606
STAMBP	0.280824	0.00113212	0.0130057	1.88587
DHODH	0.308397	0.00113609	0.0130157	1.88553
MDC1	0.328451	0.00113939	0.0130446	1.88457
IL36G	0.329669	0.00114425	0.0130555	1.88421
CASC4	0.314137	0.00114513	0.0130566	1.88417
SMARCB1	0.327881	0.00114281	0.0130569	1.88416
PIGN	0.264258	0.00114376	0.0130589	1.88409
MTRNR2L3	0.320208	0.00114268	0.0130643	1.88391
KCMF1	0.283922	0.00114222	0.013068	1.88379
MRPL36	0.299249	0.00115076	0.0131119	1.88233
COMMD2	0.262264	0.00115201	0.0131172	1.88216
MICOS13	0.298457	0.00115356	0.013126	1.88187
ARPC3	0.288292	0.00115547	0.0131387	1.88145
SMIM26	0.241143	0.00116422	0.0132293	1.87846
SNRNP27	0.311524	0.00116691	0.0132418	1.87805
CAMK2D	0.340624	0.00116891	0.0132466	1.8779
DDX1	0.318316	0.00116972	0.0132469	1.87789
ATP5F1B	0.311506	0.00116823	0.0132479	1.87785
HEXB	0.312904	0.00116685	0.0132501	1.87778
RO60	0.319019	0.00117285	0.0132644	1.87731
ICMT	0.320328	0.00117492	0.0132698	1.87714
ALS2	0.310064	0.00117434	0.0132721	1.87706
CARHSP1	0.301532	0.00117277	0.0132724	1.87705
DMD	0.300517	0.00117788	0.0132942	1.87634
FBXL14	0.308675	0.00117891	0.0132969	1.87625
ANXA5	0.323232	0.00118017	0.0133021	1.87608
ZNF229	0.325165	0.00118138	0.0133068	1.87593
CARNMT1	0.32234	0.00118548	0.0133261	1.8753
DDB1	0.306491	0.00118499	0.0133295	1.87519
GART	0.274418	0.0011842	0.0133297	1.87518
COX8A	0.310462	0.0011866	0.0133297	1.87518
PPP1R14D	0.327361	0.00119316	0.0133854	1.87337
RNF141	0.269847	0.00119275	0.0133898	1.87322
TM7SF3	0.294052	0.00119532	0.0134007	1.87287
PACS1	0.318681	0.00119841	0.0134264	1.87204
ADH5	0.271483	0.00120101	0.0134465	1.87139
PYURF	0.256782	0.00120259	0.0134552	1.87111
BTF3	0.304391	0.00120418	0.013464	1.87083
TNFRSF13B	-0.351643	0.00120712	0.0134879	1.87006
SLC41A3	0.287351	0.00120837	0.0134928	1.8699
CUL4B	0.325945	0.00120927	0.0134938	1.86987
IGSF1	0.323908	0.00121197	0.013497	1.86976
CMC4	0.313665	0.00121072	0.0135011	1.86963
NTPCR	0.265516	0.00121193	0.0135056	1.86949
BRIX1	0.298085	0.00121431	0.013514	1.86922
IRS1	0.306497	0.00121545	0.0135178	1.86909
TRMT1L	0.298752	0.00122121	0.0135458	1.86819
CDC20	0.278171	0.00121889	0.013547	1.86816
SART3	0.32555	0.00122059	0.0135479	1.86813
KCTD20	0.33174	0.00122009	0.0135514	1.86802
HNRNPC	0.316852	0.00122699	0.0135649	1.86758
IMPA1	0.280303	0.00122657	0.0135693	1.86744
RABEPK	0.267078	0.00122441	0.0135723	1.86735
RMI1	0.286172	0.00122544	0.0135747	1.86727
SSU72	0.313571	0.00122652	0.0135777	1.86717
ARMC7	0.290198	0.00123132	0.0135949	1.86662
SRD5A3	0.272249	0.00123065	0.0135965	1.86657
TTC4	0.307259	0.0012343	0.0136098	1.86615
SF3A1	0.316791	0.00123405	0.0136161	1.86595
CGAS	0.292934	0.00123684	0.0136289	1.86554
PCYOX1	0.300739	0.00124251	0.0136464	1.86498
PIGB	0.27462	0.00123955	0.0136497	1.86488
CCT8	0.285649	0.00124371	0.0136506	1.86485
PIGM	0.288345	0.00124222	0.0136522	1.8648
MTIF2	0.324083	0.00124088	0.0136554	1.86469
TAB3	0.306091	0.00124209	0.0136597	1.86456
MLF1	0.323872	0.00124902	0.0136641	1.86442
RPP38	0.29894	0.00124622	0.0136692	1.86426
MNS1	0.297974	0.00124871	0.0136696	1.86424
ZNF79	0.317657	0.00125136	0.0136718	1.86417
AURKAIP1	0.317984	0.00124831	0.0136742	1.8641
C12orf45	0.278257	0.00125272	0.0136778	1.86398
NAA50	0.325926	0.00125355	0.0136779	1.86398
DEFA1	-0.311739	0.00125118	0.0136788	1.86395
LPAR4	0.315069	0.00124813	0.0136812	1.86388
TOMM22	0.294596	0.00125765	0.0137137	1.86284
IL27RA	0.322319	0.00126001	0.0137305	1.86232
HPS4	0.318836	0.00126254	0.0137492	1.86172
NDUFA5	0.284641	0.00126627	0.0137718	1.86101
PCBP1	0.311919	0.00126575	0.0137751	1.86091
NECAP2	0.282198	0.00126862	0.0137884	1.86049
TOB2	0.28473	0.00127297	0.0137998	1.86013
MFGE8	0.302792	0.00127136	0.0138002	1.86011
C11orf49	0.283461	0.00127098	0.0138051	1.85996
ARMC6	0.289999	0.00127266	0.0138054	1.85995
WDR34	0.310718	0.00127459	0.0138085	1.85985
TRAF6	0.289968	0.00127888	0.0138103	1.8598
UBAC1	0.270291	0.00127862	0.0138164	1.85961
SLC31A1	0.290439	0.00127739	0.0138209	1.85946
NIPSNAP1	0.320074	0.00127857	0.0138248	1.85934
COPS2	0.284394	0.00127715	0.0138273	1.85926
SSBP3	0.291678	0.00128293	0.0138362	1.85898
PIGU	0.266319	0.00128275	0.0138431	1.85877
SLFN12	0.284131	0.00128932	0.0138604	1.85822
NEDD8	0.282932	0.00129028	0.0138618	1.85818
SNX15	0.301258	0.00128868	0.0138625	1.85816
ECT2	0.272685	0.00128646	0.0138652	1.85807
MSH6	0.340706	0.00129156	0.0138667	1.85803
ELP4	0.259152	0.00128857	0.0138702	1.85792
MRPS16	0.314317	0.00128855	0.0138789	1.85765
HPSE2	0.348612	0.00129564	0.0139016	1.85694
RBM8A	0.309764	0.00129904	0.0139291	1.85608
EFHC1	0.305083	0.00130279	0.0139515	1.85538
G6PD	0.312146	0.0013022	0.0139541	1.8553
HDHD5	0.325758	0.00130422	0.0139578	1.85518
DCLRE1C	0.271611	0.00131125	0.0140152	1.8534
MRPL16	0.277783	0.00131119	0.0140235	1.85314
SLC46A3	-0.311494	0.00131314	0.0140264	1.85305
ITM2A	0.290792	0.00132006	0.0140913	1.85105
JTB	0.298445	0.00132656	0.0141516	1.84919
PATJ	-0.344814	0.00132754	0.014153	1.84915
MRPS30	0.287133	0.00133511	0.0141796	1.84834
GAPDH	0.310808	0.00133271	0.0141811	1.84829
OSER1	0.308537	0.00133102	0.0141812	1.84829
MBOAT7	0.312014	0.0013349	0.0141864	1.84813
GNS	0.288378	0.00133245	0.0141873	1.8481
ADGRG1	0.2945	0.00133458	0.014192	1.84796
COPZ2	-0.340308	0.0013387	0.0141998	1.84772
UBE2D2	0.29916	0.001338	0.0142013	1.84767
DUSP11	0.279221	0.00133973	0.0142017	1.84766
L2HGDH	0.295785	0.00134149	0.0142113	1.84737
NONO	0.313011	0.00134358	0.0142155	1.84724
SNRNP200	0.314419	0.00134465	0.0142178	1.84717
POGZ	0.311737	0.00134349	0.0142234	1.847
SLC35A4	0.323539	0.00135021	0.0142675	1.84565
LMAN2L	0.284418	0.00135545	0.0142958	1.84479
PIGS	0.276858	0.00135522	0.0143024	1.84459
MGARP	0.318735	0.00135518	0.014311	1.84433
LILRB4	0.318045	0.00135777	0.0143113	1.84432
G6PC3	0.310423	0.00135966	0.0143222	1.84399
ATXN10	0.343071	0.00136132	0.0143306	1.84373
ABHD2	0.324843	0.00136361	0.0143458	1.84328
GMEB1	0.330108	0.00137785	0.0144774	1.83931
WRNIP1	0.299962	0.00137723	0.01448	1.83923
MSL2	0.288256	0.00138037	0.0144857	1.83906
ASTN1	0.338967	0.00137991	0.01449	1.83893
FAM20B	0.273859	0.00138232	0.014497	1.83872
RNF13	0.317681	0.00138579	0.0145243	1.83791
TOPORS	0.291779	0.00138903	0.0145401	1.83743
PRDX6	0.307691	0.00138997	0.0145408	1.83741
AQR	0.300443	0.00138842	0.0145428	1.83735
MTA2	0.310096	0.00139205	0.0145535	1.83703
TTC17	0.272952	0.0013937	0.0145617	1.83679
RAD23B	0.316019	0.00140035	0.0146038	1.83553
RIOX2	0.266697	0.00139877	0.0146055	1.83548
SNX6	0.276215	0.00139972	0.0146063	1.83546
CCDC15	0.297907	0.00140173	0.014609	1.83538
SSR2	0.313073	0.00140369	0.0146113	1.83531
TSPY4	0.346341	0.00140467	0.0146124	1.83528
BRCC3	0.271394	0.00140581	0.0146152	1.8352
TMEM251	0.279441	0.00140331	0.0146164	1.83516
NSUN3	0.288515	0.00140717	0.0146203	1.83504
GRID2	0.331476	0.0014147	0.0146894	1.833
WDR82	0.262728	0.00141847	0.0147194	1.83211
AKR7A2	0.300038	0.00142221	0.0147399	1.83151
DNAJC9	0.310839	0.00142146	0.0147413	1.83147
NUP42	0.260652	0.00142437	0.014744	1.83138
MRPL44	0.273665	0.00142377	0.0147469	1.8313
CDC25C	0.2807	0.00142598	0.0147516	1.83116
ATP5MD	0.267668	0.0014337	0.0148132	1.82935
COL9A3	-0.326321	0.00143338	0.0148189	1.82918
CFAP298	0.299017	0.00143654	0.0148334	1.82876
GPR108	0.320585	0.00143935	0.0148531	1.82818
DCAF8L2	0.336118	0.00144029	0.0148537	1.82817
SLC30A8	0.341684	0.00144256	0.014868	1.82775
BOD1	0.297184	0.00144644	0.0148897	1.82712
PTPN11	0.293679	0.00144635	0.0148979	1.82688
SENP5	0.291737	0.00145182	0.0149266	1.82604
AMOT	0.312985	0.00145174	0.014935	1.8258
MTX1	0.289744	0.00145899	0.0149911	1.82417
PSMB1	0.303205	0.00146407	0.0150249	1.82319
ZBTB9	0.315878	0.00146335	0.0150267	1.82314
AGTRAP	0.285049	0.00146702	0.0150275	1.82311
CYB5B	0.302537	0.00146817	0.0150301	1.82304
TRPM7	0.285505	0.00146669	0.0150334	1.82294
RPL10A	0.293203	0.00146613	0.0150368	1.82284
LSM8	0.260981	0.00147017	0.0150414	1.82271
CPSF4	0.284082	0.00147385	0.0150514	1.82242
RPS25	0.299704	0.0014735	0.0150571	1.82226
COIL	0.304567	0.00147549	0.015059	1.82221
TNFRSF8	0.319502	0.00147319	0.0150631	1.82209
ALG13	0.287729	0.00147779	0.0150641	1.82206
MTFMT	0.266412	0.00147907	0.015068	1.82195
ADM	0.30329	0.00147737	0.015069	1.82192
NDUFC1	0.260211	0.00148289	0.0150702	1.82188
SRP72	0.320424	0.001482	0.0150703	1.82188
TMEM168	0.263829	0.0014809	0.0150775	1.82167
TMEM69	0.283441	0.00148198	0.0150792	1.82162
GINS3	0.270593	0.00148691	0.0150927	1.82123
RPS17	0.29418	0.00148782	0.0150929	1.82123
SQOR	0.280827	0.00148641	0.0150969	1.82111
AK6	0.276371	0.00149034	0.0151001	1.82102
CCNB3	0.320238	0.00148993	0.0151051	1.82088
WDYHV1	0.319383	0.00149387	0.0151266	1.82026
ZMAT3	0.287464	0.00149579	0.0151278	1.82022
BCKDHA	0.306689	0.00149542	0.0151332	1.82007
HSD17B11	0.292637	0.00149872	0.0151483	1.81964
SGO2	0.272327	0.00150149	0.0151671	1.8191
DUSP26	-0.327983	0.00150246	0.0151678	1.81908
POLR2I	0.296963	0.00150823	0.0151802	1.81872
VRK2	0.255917	0.00150792	0.0151863	1.81855
ATF6B	0.325622	0.00150717	0.0151878	1.8185
MAD2L1BP	0.265506	0.00150683	0.0151936	1.81834
NDUFB1	0.262242	0.00150617	0.0151961	1.81827
PNKD	0.272643	0.00151465	0.0151991	1.81818
HSPB3	0.318587	0.00151147	0.0152037	1.81805
BZW1	0.307206	0.00151334	0.0152043	1.81803
UCHL5	0.313848	0.00151441	0.0152059	1.81799
SOCS5	0.310517	0.00151305	0.0152105	1.81786
NOC3L	0.269472	0.0015173	0.0152166	1.81768
HMGN4	0.340258	0.00152453	0.01528	1.81588
EEF1A1	0.30398	0.00153162	0.0153418	1.81412
DBR1	0.303917	0.00153762	0.0153927	1.81268
UBQLN4	0.317663	0.00154256	0.0154237	1.81181
NAXE	0.299946	0.00154164	0.0154238	1.81181
RNPS1	0.306648	0.00154653	0.0154542	1.81095
WDR11	0.322227	0.0015535	0.0154869	1.81004
ATAD5	0.268511	0.00155085	0.0154881	1.81
SNAP29	0.280031	0.00155293	0.0154904	1.80994
ORAI1	0.287841	0.0015521	0.0154914	1.80991
UBE4A	0.282232	0.00155743	0.0154984	1.80971
RANBP6	0.259252	0.00155865	0.0155013	1.80963
TARS2	0.319884	0.00155962	0.0155017	1.80962
PSMB9	0.305643	0.00155732	0.0155065	1.80949
GON4L	0.305744	0.00155672	0.0155098	1.80939
THEM4	0.266781	0.00156259	0.015522	1.80905
DUSP7	0.275023	0.00156501	0.0155368	1.80864
STRADA	0.263108	0.00156956	0.0155728	1.80763
FAM98B	0.277608	0.00157483	0.0155881	1.80721
RAB29	0.324556	0.00157419	0.015591	1.80712
ZSCAN31	0.311727	0.00157639	0.0155943	1.80703
NDC80	0.288936	0.00157781	0.0155992	1.8069
TM2D2	0.246841	0.00157417	0.0156	1.80688
BRAP	0.332363	0.00157406	0.0156082	1.80665
PAQR3	0.263696	0.0015817	0.0156283	1.80609
ZBTB25	0.304106	0.00158624	0.0156548	1.80535
ESYT3	0.313037	0.00158594	0.015661	1.80518
POLDIP2	0.318116	0.00159126	0.0156766	1.80475
FOXN2	0.309726	0.00158945	0.0156772	1.80473
ERVK3-1	0.316789	0.00159041	0.0156774	1.80472
UBE2C	0.272561	0.00159237	0.0156783	1.8047
RNASEH2C	0.313043	0.0015938	0.0156831	1.80457
UBD	0.31435	0.0015978	0.015704	1.80399
HIST1H2BO	0.246604	0.00159728	0.0157081	1.80388
COA7	0.266619	0.00160159	0.0157321	1.80321
UQCRHL	0.273359	0.00160901	0.0157679	1.80222
KIF1BP	0.29163	0.00160821	0.0157693	1.80219
HAUS1	0.242413	0.00160774	0.0157739	1.80206
NAE1	0.310499	0.00160743	0.0157802	1.80189
PPP1R11	0.251159	0.00161402	0.0158077	1.80113
AAMP	0.319216	0.00161508	0.0158089	1.8011
NUAK2	0.322148	0.00162156	0.015863	1.79961
CAMK2N2	0.312913	0.00162716	0.0158992	1.79862
MRPS12	0.258797	0.00162702	0.0159072	1.79841
TUBG1	0.306646	0.00162956	0.0159134	1.79824
EHMT2	0.308023	0.00163282	0.0159267	1.79787
RIC8A	0.301689	0.00163199	0.0159278	1.79784
HMGN2	0.303929	0.00163623	0.0159506	1.79722
KLHL24	0.309052	0.00163753	0.015954	1.79713
RIOK2	0.292188	0.00164205	0.0159887	1.79619
PARPBP	0.255655	0.00164548	0.0160128	1.79553
TMBIM4	0.24339	0.00164959	0.0160342	1.79495
CAD	0.307607	0.00164924	0.0160401	1.79479
KCTD21	0.306013	0.00165334	0.0160519	1.79447
TNPO3	0.285628	0.00165278	0.0160559	1.79437
TMEM185A	0.317892	0.00166881	0.0161741	1.79118
TIGD2	0.276614	0.00166787	0.0161743	1.79117
OR7C1	0.282149	0.00167086	0.0161752	1.79115
CD27	-0.310173	0.00167014	0.0161776	1.79109
VBP1	0.296256	0.00166786	0.0161836	1.79093
ATP6V1G1	0.294899	0.00167837	0.0162385	1.78945
TRPM1	0.31252	0.00168078	0.0162524	1.78908
FANCM	0.273551	0.00168734	0.0163064	1.78764
NTF3	0.330875	0.00168843	0.0163075	1.78761
ZNF664	0.310581	0.00168948	0.0163083	1.78759
HDAC8	0.276461	0.00169096	0.0163131	1.78746
CCT2	0.281146	0.00169677	0.0163597	1.78622
HSPD1	0.300977	0.00170159	0.0163967	1.78524
UBE2Z	0.314826	0.00170305	0.0164014	1.78512
ORAI2	0.319843	0.00170543	0.0164149	1.78476
PRPF19	0.274764	0.00171118	0.0164513	1.7838
ZNF146	0.303044	0.0017104	0.0164533	1.78375
PDS5A	0.309624	0.00171359	0.0164651	1.78344
MYH8	0.327934	0.00171489	0.0164681	1.78336
HIST1H4C	0.252306	0.0017176	0.0164751	1.78317
MED13	0.308135	0.00171673	0.0164763	1.78314
VPS29	0.262405	0.00171898	0.016479	1.78307
KLHDC10	0.269961	0.00172733	0.0165401	1.78146
PRCP	0.304811	0.00172905	0.0165471	1.78128
B3GAT1	0.304137	0.00173209	0.0165478	1.78126
SYF2	0.293958	0.00172721	0.0165484	1.78124
MCMBP	0.273953	0.00173035	0.01655	1.7812
GAGE2E	0.342004	0.00173337	0.0165506	1.78119
ZNF449	0.286788	0.00173196	0.016556	1.78105
CLPP	0.296373	0.00173583	0.0165646	1.78082
CNIH4	0.24209	0.00174385	0.0166127	1.77956
PTPN4	0.287257	0.00174318	0.0166158	1.77948
DNAJC7	0.294997	0.00174246	0.0166184	1.77941
LARS	0.303186	0.00174751	0.0166381	1.7789
MCM4	0.304855	0.00175128	0.0166646	1.77821
KCNH4	0.31506	0.00175487	0.0166797	1.77781
PSMA3	0.338576	0.00175411	0.0166819	1.77775
BCORL1	0.311701	0.00175691	0.0166896	1.77755
TRMT10C	0.298756	0.00175846	0.0166949	1.77742
ERCC6L	0.282268	0.00176143	0.0167136	1.77693
ERGIC3	0.312083	0.00176311	0.0167201	1.77676
SAMD9	0.274433	0.00176485	0.0167271	1.77658
CHCHD2	0.293868	0.00176676	0.0167357	1.77636
DEPDC1	0.271552	0.0017681	0.0167389	1.77627
BID	0.304998	0.00177115	0.0167489	1.77601
DTD2	0.295298	0.00177083	0.0167553	1.77585
CGREF1	0.336664	0.00177375	0.016764	1.77562
DENND4B	0.298139	0.00177574	0.0167733	1.77538
PES1	0.310775	0.00178577	0.0167923	1.77489
RASSF8	0.284194	0.00178545	0.0167986	1.77473
ASL	0.30503	0.00178499	0.0168038	1.77459
TMEM184C	0.296556	0.00179267	0.0168099	1.77443
MAGEB18	0.332003	0.00178491	0.0168125	1.77437
MTO1	0.268933	0.00178307	0.0168141	1.77433
NFKBIL1	0.300857	0.00178419	0.0168152	1.7743
TMEM60	0.28393	0.00179229	0.0168158	1.77428
MEAF6	0.266744	0.00178253	0.0168185	1.77421
ESYT2	0.285306	0.00179184	0.016821	1.77415
PGGT1B	0.217333	0.00178181	0.0168212	1.77414
DSEL	0.3175	0.00179134	0.0168257	1.77403
KIAA1586	0.252803	0.00179041	0.0168264	1.77401
CKLF	0.289566	0.00179826	0.016834	1.77381
MSH3	0.287553	0.00179667	0.016838	1.77371
TMEM175	-0.302178	0.00179771	0.0168383	1.7737
PEX1	0.296849	0.00180106	0.0168508	1.77338
MSMO1	0.258567	0.00180993	0.0169243	1.77149
DLGAP5	0.247033	0.00181255	0.01693	1.77134
ZNF25	0.265887	0.00181238	0.0169378	1.77114
PSMD3	0.300386	0.00181902	0.0169809	1.77004
TRIM31	0.324706	0.00182289	0.0170075	1.76936
RNF170	0.268359	0.0018254	0.017012	1.76924
UMPS	0.25707	0.00182462	0.0170142	1.76919
POMK	0.289836	0.00182832	0.0170297	1.76879
HDAC2	0.291438	0.00183162	0.0170415	1.76849
MED1	0.290132	0.00183159	0.0170507	1.76826
MAGEA2B	0.340146	0.00183802	0.0170915	1.76722
DCAF1	0.312419	0.001847	0.017156	1.76558
SLC25A40	0.305618	0.00184676	0.0171632	1.7654
ORC3	0.315406	0.00184892	0.0171643	1.76537
ZNRD2	0.306609	0.00185145	0.0171782	1.76502
CLCN3	0.295681	0.00185568	0.0171794	1.76499
SUMO2	0.279525	0.00185383	0.0171813	1.76494
KARS	0.306258	0.00185352	0.017188	1.76478
ANAPC16	0.276444	0.00185562	0.0171884	1.76476
LZIC	0.292035	0.001859	0.0172006	1.76446
VPS18	0.304063	0.00186079	0.0172076	1.76428
UBE2L3	0.304198	0.00186195	0.0172089	1.76425
OAS1	0.306286	0.00186564	0.0172335	1.76363
LYPLA1	0.243727	0.00186912	0.0172562	1.76306
MRPL28	0.300889	0.00187441	0.0172764	1.76255
GMPS	0.317699	0.00187353	0.0172778	1.76251
SRSF3	0.253311	0.00187267	0.0172793	1.76247
KHDC4	0.246418	0.00187616	0.017283	1.76238
NUDC	0.307523	0.00188082	0.0173068	1.76178
C19orf12	0.233552	0.00188042	0.0173127	1.76163
CHTF8	0.25575	0.00188272	0.0173148	1.76158
MRPS18B	0.291216	0.00188532	0.0173197	1.76146
B3GALNT2	0.333128	0.00188517	0.0173278	1.76126
DRG1	0.318139	0.00189091	0.0173615	1.76041
DAG1	0.313738	0.00189446	0.0173846	1.75983
IPO7	0.306347	0.00190094	0.0174345	1.75859
XRN2	0.304386	0.0019034	0.0174475	1.75827
TNFRSF10D	0.312171	0.00190603	0.0174621	1.7579
MRPL21	0.292593	0.0019082	0.0174724	1.75765
PSG7	0.314468	0.001923	0.0175598	1.75548
SNX18	0.301699	0.0019242	0.0175612	1.75544
GGCX	0.296689	0.00192156	0.0175659	1.75533
SECISBP2L	0.297714	0.00192291	0.0175686	1.75526
HAX1	0.300444	0.00192029	0.0175734	1.75514
CNOT11	0.305999	0.0019215	0.0175749	1.75511
MLLT3	0.311081	0.00192845	0.0175904	1.75472
FCRL4	0.321704	0.00194195	0.0176847	1.7524
BROX	0.273122	0.00194129	0.0176883	1.75231
VPS4B	0.328347	0.00194397	0.0176934	1.75219
ZBTB22	0.298607	0.00194109	0.0176961	1.75212
UBA2	0.314647	0.00194768	0.0177175	1.7516
POTEG	0.315266	0.00195107	0.0177388	1.75108
KIAA0040	0.292246	0.00195419	0.0177478	1.75085
APEX2	0.27465	0.00195403	0.017756	1.75065
TDG	0.254791	0.00195964	0.0177877	1.74988
RFC4	0.276602	0.0019622	0.0178013	1.74955
SLC39A6	0.29584	0.00196654	0.0178213	1.74906
ZDHHC4	0.272849	0.00196614	0.0178273	1.74891
COX5A	0.286321	0.00198014	0.0179154	1.74677
OSGIN2	0.261566	0.00197957	0.01792	1.74666
METTL18	0.286623	0.00197911	0.0179255	1.74653
RNF8	0.295832	0.00198526	0.017952	1.74589
LRRIQ4	0.302899	0.0019907	0.0179722	1.7454
NXF2B	0.318884	0.00199054	0.0179804	1.7452
TP53TG3	0.318009	0.00198965	0.0179821	1.74516
TNFRSF4	-0.321528	0.00199327	0.0179856	1.74507
LRP2	0.310422	0.00199445	0.0179866	1.74505
POLR1C	0.255469	0.00199585	0.0179895	1.74498
HEPHL1	0.310407	0.00200337	0.0180476	1.74358
TATDN1	0.286618	0.00200527	0.018055	1.7434
RPN1	0.307171	0.00200835	0.018073	1.74297
TSPEAR	0.338449	0.00200949	0.0180735	1.74296
APOBEC3G	0.312655	0.00201064	0.0180742	1.74294
LINS1	0.236918	0.00201611	0.0181136	1.74199
FMR1NB	0.33842	0.00201934	0.0181329	1.74153
RBM27	0.286885	0.00202125	0.0181403	1.74136
BTBD3	0.286896	0.00202359	0.0181419	1.74132
FAM204A	0.261657	0.00202279	0.0181444	1.74126
PAM16	0.264574	0.00202767	0.018159	1.74091
COA1	0.326733	0.0020291	0.0181621	1.74083
PAXIP1	0.298652	0.00202738	0.0181661	1.74074
CCSER2	0.308668	0.00203404	0.0181966	1.74001
MAP2K1	0.290319	0.00203577	0.0182023	1.73987
SNAPC2	0.264977	0.00204157	0.0182444	1.73887
VPS11	0.30944	0.00204767	0.0182794	1.73804
CFAP36	0.305617	0.00204664	0.01828	1.73802
MTMR10	0.265035	0.00204969	0.0182877	1.73784
TMEM17	0.293269	0.0020576	0.018329	1.73686
CLNS1A	0.317702	0.00205709	0.0183342	1.73674
ANO9	-0.310492	0.00205669	0.0183403	1.73659
NVL	0.268625	0.00206739	0.0184064	1.73503
TIRAP	0.302205	0.00208097	0.0184683	1.73357
MED27	0.287683	0.00208239	0.0184711	1.73351
C17orf107	-0.308071	0.00207921	0.0184723	1.73348
RPL24	0.285294	0.00208043	0.0184734	1.73345
RDX	0.312951	0.00207631	0.018476	1.73339
PIP4K2B	0.263714	0.00207867	0.0184773	1.73336
NDUFAF3	0.299233	0.00207779	0.0184793	1.73331
SMU1	0.250418	0.00209084	0.0184971	1.7329
TPGS2	0.24937	0.00208692	0.0185015	1.73279
TMEM167A	0.275627	0.00208832	0.0185041	1.73273
BBS12	0.281553	0.00208957	0.0185054	1.7327
KANSL1L	0.328679	0.00209072	0.0185058	1.73269
KRBOX1	0.328949	0.00209534	0.0185173	1.73242
USP5	0.278416	0.00209518	0.0185257	1.73223
XAB2	0.303612	0.00210108	0.0185485	1.73169
RPAP1	0.276072	0.00210093	0.0185569	1.73149
BLM	0.285858	0.00210526	0.0185756	1.73106
PABPC1	0.296104	0.00211255	0.01863	1.72979
HAT1	0.27051	0.00211459	0.0186383	1.72959
RETREG2	0.300748	0.00215242	0.0187641	1.72667
AP3B1	0.309763	0.0021559	0.0187652	1.72665
CHMP2A	0.290193	0.00215716	0.0187664	1.72662
SLFN12L	0.303169	0.00215505	0.0187676	1.72659
DIXDC1	0.298347	0.00214954	0.0187684	1.72657
MED16	0.307064	0.00215101	0.0187714	1.7265
CIP2A	0.2899	0.00214888	0.0187724	1.72648
AGPS	0.281451	0.0021523	0.0187729	1.72647
ZBTB7B	0.28377	0.00213333	0.0187738	1.72645
TTF1	0.300246	0.00215918	0.0187742	1.72644
LRRC7	0.307926	0.00215494	0.0187764	1.72639
MRPL15	0.280243	0.00214852	0.018779	1.72633
RBM22	0.314206	0.00213294	0.0187802	1.7263
BOLA2	0.298288	0.00213237	0.0187851	1.72619
TBL1XR1	0.297093	0.00214588	0.0187855	1.72618
HSD17B12	0.268861	0.00214836	0.0187875	1.72613
TPRG1	0.307002	0.00213715	0.0187876	1.72613
RGS4	0.314358	0.00214771	0.0187916	1.72604
MYO5A	0.304395	0.00214558	0.0187927	1.72601
SEMA4B	0.296543	0.00213667	0.0187932	1.726
PKP4	0.285028	0.00214033	0.0187958	1.72594
DUS4L	0.284512	0.00214154	0.0187966	1.72592
SNX1	0.299221	0.00214396	0.0187981	1.72589
CERT1	0.28592	0.00213951	0.0187985	1.72588
GRID1	0.326205	0.00214536	0.0188006	1.72583
COPG2	0.282603	0.00214313	0.0188006	1.72583
CHCHD3	0.314095	0.0021636	0.0188029	1.72578
SLC24A1	0.273917	0.00216727	0.0188153	1.72549
SELL	0.272467	0.0021662	0.0188157	1.72548
ZNF300	0.306695	0.00216971	0.0188267	1.72523
FANCD2	0.278205	0.00217134	0.018831	1.72513
TTC7B	-0.309124	0.00217409	0.0188451	1.7248
STOX2	-0.298343	0.00217625	0.0188541	1.72459
IL13RA2	0.327888	0.00218191	0.0188934	1.72369
SLAMF6	0.303546	0.00218716	0.018929	1.72287
DNAAF5	0.284076	0.0021955	0.0189913	1.72144
DNAH7	0.284164	0.00219861	0.0190085	1.72105
NDUFAF2	0.238587	0.00220729	0.0190638	1.71979
MRPS10	0.263758	0.00220715	0.0190724	1.71959
KDSR	0.275414	0.00221236	0.0190977	1.71902
C11orf74	0.274464	0.00222254	0.0191166	1.71859
CDC123	0.294101	0.00221608	0.0191199	1.71851
FAM217B	0.302339	0.00222184	0.0191204	1.7185
ASCC1	0.246377	0.00222125	0.0191252	1.71839
SUCO	0.281262	0.00222103	0.0191331	1.71821
FAM241B	0.312965	0.00222055	0.0191388	1.71808
TUBA3C	0.342007	0.00221998	0.0191438	1.71797
UBLCP1	0.295771	0.00222865	0.0191593	1.71762
ARPC2	0.293115	0.00223036	0.0191641	1.71751
SEM1	0.268515	0.00223517	0.0191956	1.7168
GFM2	0.279543	0.00224176	0.0192325	1.71596
PSMG1	0.296281	0.00224163	0.0192413	1.71577
SMARCAD1	0.246944	0.00224858	0.0192417	1.71576
HIST1H2BF	0.254923	0.00224429	0.0192443	1.7157
HLTF	0.291485	0.00225126	0.019245	1.71568
UXT	0.267983	0.0022458	0.0192474	1.71563
BSCL2	0.273364	0.00224723	0.0192498	1.71557
HBE1	0.308993	0.00224845	0.0192504	1.71556
UQCR11	0.230631	0.00225096	0.0192522	1.71552
OPA1	0.297415	0.00225394	0.019258	1.71539
NR5A2	0.308763	0.00225629	0.0192584	1.71538
TMEM230	0.269371	0.00225627	0.0192681	1.71516
APMAP	0.298728	0.00226004	0.0192708	1.7151
YARS2	0.279277	0.00225984	0.0192789	1.71492
UBIAD1	0.278777	0.0022705	0.0193501	1.71332
DDX58	0.289266	0.00227946	0.0194166	1.71183
PHTF1	0.267829	0.00228193	0.0194278	1.71158
TIAL1	0.279623	0.00228754	0.0194458	1.71117
CLDN12	0.296153	0.00228889	0.0194475	1.71114
FCF1	0.282051	0.00228685	0.0194499	1.71108
ZDHHC16	0.218535	0.0022865	0.0194567	1.71093
DAZAP2	0.279436	0.00230426	0.0195681	1.70845
MAPK1	0.287225	0.00230557	0.0195693	1.70843
CAMSAP2	0.292312	0.00231045	0.0195909	1.70795
STXBP6	0.273266	0.00231033	0.0195997	1.70775
ZNF138	0.312074	0.00231411	0.019602	1.7077
FHOD3	0.312856	0.0023157	0.0196056	1.70762
ARF1	0.297664	0.00231405	0.0196115	1.70749
SPCS1	0.28726	0.00233085	0.0197239	1.70501
ARF3	0.30697	0.00233351	0.0197364	1.70473
SVIP	0.289219	0.00233555	0.0197436	1.70457
NSD1	0.292354	0.00233784	0.019753	1.70437
PIGF	0.31219	0.00234393	0.0197945	1.70346
RAF1	0.302264	0.00234652	0.0197964	1.70341
DEPDC1B	0.262	0.00234819	0.0198005	1.70332
CENPU	0.266018	0.00234588	0.019801	1.70331
SERINC3	0.290579	0.00235263	0.019828	1.70272
STK31	0.308082	0.00235427	0.0198318	1.70264
MGAT4B	0.302222	0.00236268	0.0198926	1.70131
RXRB	0.29956	0.00237129	0.019925	1.7006
PRKRA	0.318881	0.00237317	0.0199308	1.70048
RBMX	0.241275	0.0023708	0.0199309	1.70047
DCUN1D1	0.30396	0.00236966	0.0199314	1.70046
TRAPPC8	0.294907	0.00236865	0.0199328	1.70043
ASNSD1	0.234364	0.00237702	0.0199532	1.69999
SMG7	0.295711	0.00238085	0.0199553	1.69994
CASP10	0.312479	0.00237865	0.0199568	1.69991
OTUD4	0.289317	0.00238019	0.0199597	1.69984
ORMDL2	0.278218	0.00238486	0.0199689	1.69965
THAP4	0.311859	0.00238753	0.0199712	1.6996
[truncated: 14,739 more rows]

## Sheet: NDMM_vs_LRMM
GENE	Mean_Diff_zScore_(LRMM-NDMM)	p_value	q_value	Minus_Log(q_value)
MAGEA1	1.02875	1.99754e-23	1.67174e-19	18.7768
ASPM	1.05179	1.74403e-23	2.91916e-19	18.5347
KIF14	1.05967	9.71254e-23	5.41895e-19	18.2661
KNL1	0.93163	4.33322e-22	1.81323e-18	17.7415
NUSAP1	0.995595	7.48385e-22	2.50529e-18	17.6011
STMN1	1.0652	1.14811e-21	3.20283e-18	17.4945
HIST1H3B	1.0017	2.82532e-21	5.91128e-18	17.2283
RFX5	0.963265	2.57534e-21	6.15802e-18	17.2106
BUB1	0.97816	4.69616e-21	8.73382e-18	17.0588
PSMD4	0.97863	7.14798e-21	1.19643e-17	16.9221
BANF1	0.983152	2.121e-20	3.22739e-17	16.4911
MEMO1	0.939951	8.52449e-20	1.18902e-16	15.9248
TMEM183A	0.921649	1.30488e-19	1.68009e-16	15.7747
TUBB	0.957015	2.54266e-19	3.03994e-16	15.5171
KLHDC3	0.97095	3.3246e-19	3.70981e-16	15.4306
FIBP	0.804141	4.85683e-19	5.08085e-16	15.2941
CFL1	0.929197	1.47572e-18	1.45298e-15	14.8377
HTR2C	0.942031	1.5667e-18	1.45686e-15	14.8366
RBBP8	0.860214	1.8378e-18	1.61901e-15	14.7908
KIFC1	0.941798	4.64779e-18	3.88974e-15	14.4101
AGPS	0.933449	7.99647e-18	5.14788e-15	14.2884
ARPC5	0.947484	7.2977e-18	5.31082e-15	14.2748
TOP2A	0.927252	7.94423e-18	5.31882e-15	14.2742
SCNM1	0.906989	7.64421e-18	5.3312e-15	14.2732
CBX3	0.927668	7.24183e-18	5.50972e-15	14.2589
VAMP7	0.824962	7.12815e-18	5.68148e-15	14.2455
FDPS	0.855241	1.01069e-17	6.26556e-15	14.203
ADSS	0.942737	1.26593e-17	7.56756e-15	14.121
CENPF	0.929397	1.33975e-17	7.73268e-15	14.1117
RRM2	0.869652	1.44362e-17	8.05442e-15	14.094
MDH1	0.80162	1.54217e-17	8.32675e-15	14.0795
TPX2	0.915412	2.28241e-17	1.15766e-14	13.9364
H3F3A	0.931176	2.27535e-17	1.19015e-14	13.9244
MCM2	0.871397	2.53193e-17	1.24645e-14	13.9043
PEX19	0.838342	2.6637e-17	1.27386e-14	13.8949
KIF18A	0.930606	3.12356e-17	1.37585e-14	13.8614
PPP2R5A	0.917055	3.01275e-17	1.40076e-14	13.8536
GNPAT	0.771334	3.10068e-17	1.40268e-14	13.853
DCK	0.922603	3.41263e-17	1.46463e-14	13.8343
NEK2	0.964297	4.36575e-17	1.82685e-14	13.7383
SNRPB	0.732686	4.60663e-17	1.88063e-14	13.7257
COP1	0.859972	6.08941e-17	2.42678e-14	13.615
TUBA1B	0.921894	6.60767e-17	2.57208e-14	13.5897
YWHAQ	0.887629	7.58555e-17	2.88561e-14	13.5398
ACBD6	0.863071	9.96887e-17	3.55019e-14	13.4497
CCT3	0.760186	9.58669e-17	3.56582e-14	13.4478
ARHGAP11A	0.857303	9.89409e-17	3.60016e-14	13.4437
DARS2	0.839239	1.07599e-16	3.67549e-14	13.4347
TRIM21	0.777369	1.11178e-16	3.72178e-14	13.4292
TPM3	0.868561	1.06765e-16	3.72299e-14	13.4291
PRKDC	0.841335	1.15199e-16	3.7808e-14	13.4224
NDUFS2	0.868566	1.17556e-16	3.78394e-14	13.4221
CCNB2	0.914417	1.19904e-16	3.78672e-14	13.4217
WEE1	0.902722	1.32386e-16	4.10347e-14	13.3868
HMGN2	0.833852	1.61704e-16	4.9211e-14	13.3079
HDGF	0.864115	1.87837e-16	5.61432e-14	13.2507
APOBEC3B	0.816847	1.95096e-16	5.72897e-14	13.2419
BRIP1	0.867128	2.03323e-16	5.86763e-14	13.2315
CCNB1	0.929283	2.21989e-16	6.29772e-14	13.2008
SDHC	0.794044	2.5718e-16	7.17446e-14	13.1442
SRPK2	0.853856	2.70001e-16	7.40866e-14	13.1303
RMDN1	0.652278	3.07358e-16	8.29768e-14	13.081
DLGAP5	0.900137	4.29955e-16	1.14231e-13	12.9422
HIST1H3F	0.905521	4.75286e-16	1.2239e-13	12.9123
MSH2	0.794317	4.69692e-16	1.22839e-13	12.9107
UHMK1	0.903659	4.92759e-16	1.24967e-13	12.9032
DAP3	0.824726	5.09702e-16	1.27334e-13	12.8951
POLR3C	0.803268	5.40297e-16	1.32992e-13	12.8762
CAPZB	0.858736	5.58888e-16	1.35575e-13	12.8678
KIF4A	0.925784	5.96739e-16	1.40679e-13	12.8518
KIF11	0.908529	5.94804e-16	1.42226e-13	12.847
TALDO1	0.830313	6.34414e-16	1.47484e-13	12.8313
BCAP31	0.88009	6.7649e-16	1.55111e-13	12.8094
AGTPBP1	0.830463	6.9723e-16	1.57706e-13	12.8022
PSMA7	0.875193	7.23407e-16	1.61445e-13	12.792
CDK1	0.888937	7.3739e-16	1.624e-13	12.7894
POLQ	0.810173	7.89919e-16	1.7171e-13	12.7652
ARPC2	0.864351	8.43191e-16	1.8094e-13	12.7425
DUT	0.735841	8.90922e-16	1.88763e-13	12.7241
TPP1	0.946092	1.02807e-15	2.15098e-13	12.6674
HIST2H3C	0.859754	1.12369e-15	2.32202e-13	12.6341
SMC4	0.787317	1.15213e-15	2.32341e-13	12.6339
GET3	0.785824	1.14526e-15	2.33772e-13	12.6312
GLRX3	0.727344	1.21083e-15	2.41272e-13	12.6175
RANBP1	0.83939	1.27375e-15	2.50824e-13	12.6006
PHF19	0.878547	1.30501e-15	2.5399e-13	12.5952
GART	0.817996	1.4387e-15	2.70573e-13	12.5677
LDHA	0.746775	1.40668e-15	2.70633e-13	12.5676
CDC20	0.878156	1.42428e-15	2.70905e-13	12.5672
SNF8	0.82228	1.60899e-15	2.99236e-13	12.524
XPO1	0.748361	1.68084e-15	3.09163e-13	12.5098
SNX6	0.951849	1.77018e-15	3.22057e-13	12.4921
CACYBP	0.82155	2.11488e-15	3.80634e-13	12.4195
APH1A	0.842344	2.1502e-15	3.82872e-13	12.4169
FOXM1	0.850343	2.20232e-15	3.88026e-13	12.4111
IARS2	0.8024	2.28717e-15	3.94667e-13	12.4038
PAICS	0.724019	2.2678e-15	3.954e-13	12.403
SUPT16H	0.833054	2.33995e-15	3.99655e-13	12.3983
COX8A	0.812636	2.41593e-15	4.08464e-13	12.3888
ENO1	0.841809	2.6803e-15	4.44187e-13	12.3524
CCT4	0.812116	2.65608e-15	4.44575e-13	12.3521
TRIP13	0.841063	2.83814e-15	4.65733e-13	12.3319
DCAF6	0.873917	2.96904e-15	4.77844e-13	12.3207
NUP133	0.803746	2.94672e-15	4.78857e-13	12.3198
HMGB3	0.945412	3.11773e-15	4.96995e-13	12.3036
PKM	0.858525	3.83598e-15	6.05724e-13	12.2177
ILK	0.821345	3.98969e-15	6.24106e-13	12.2047
HJURP	0.851399	4.16979e-15	6.46241e-13	12.1896
CCNA2	0.906447	4.25872e-15	6.48023e-13	12.1884
CEP55	0.832797	4.2305e-15	6.49635e-13	12.1873
PSMB4	0.794994	4.42414e-15	6.67128e-13	12.1758
CTAG2	0.800826	4.68842e-15	6.82389e-13	12.166
DRAP1	0.839747	4.66796e-15	6.85371e-13	12.1641
GUK1	0.786678	4.59454e-15	6.86638e-13	12.1633
CDCA2	0.878741	4.64132e-15	6.87491e-13	12.1627
GRSF1	0.701732	4.85997e-15	7.0126e-13	12.1541
PRDX3	0.817985	5.08443e-15	7.27378e-13	12.1382
NSL1	0.77953	5.50621e-15	7.81042e-13	12.1073
SF3B4	0.77194	5.91647e-15	8.25249e-13	12.0834
PPIA	0.84015	5.86991e-15	8.25636e-13	12.0832
ADH5	0.795101	6.49279e-15	8.76422e-13	12.0573
MTHFD1	0.802542	6.3628e-15	8.8017e-13	12.0554
NAA10	0.835767	6.4888e-15	8.83004e-13	12.054
SAMD9	0.906961	6.46415e-15	8.8686e-13	12.0521
RAD21	0.816457	6.65447e-15	8.9106e-13	12.0501
SPAG5	0.76274	6.99393e-15	9.29083e-13	12.0319
E2F2	0.848496	7.14746e-15	9.42001e-13	12.0259
CKAP5	0.825999	7.36395e-15	9.62951e-13	12.0164
NUP155	0.729157	7.61774e-15	9.88416e-13	12.0051
NRAS	0.786465	8.18998e-15	1.05449e-12	11.977
UBE2C	0.882762	9.4762e-15	1.20161e-12	11.9202
UTP18	0.801444	9.42204e-15	1.20386e-12	11.9194
SGO2	0.884391	9.65181e-15	1.21468e-12	11.9155
UAP1	0.737847	1.12737e-14	1.4082e-12	11.8513
SNX1	0.836392	1.13994e-14	1.41335e-12	11.8497
ACOT7	0.840948	1.20199e-14	1.47933e-12	11.8299
BIRC5	0.817629	1.25573e-14	1.53419e-12	11.8141
TIMM8B	0.703046	1.33626e-14	1.62075e-12	11.7903
MAGEB16	0.850861	1.37912e-14	1.6607e-12	11.7797
HAUS7	0.801439	1.39191e-14	1.66413e-12	11.7788
DHFR	0.789165	1.51063e-14	1.79326e-12	11.7464
FLAD1	0.765282	1.67866e-14	1.97869e-12	11.7036
NXT2	0.833946	1.69359e-14	1.98233e-12	11.7028
PRC1	0.767669	1.7407e-14	2.02333e-12	11.6939
NDUFA2	0.732664	1.78248e-14	2.0576e-12	11.6866
NDUFB8	0.714608	1.80188e-14	2.06574e-12	11.6849
RAD51	0.815683	1.85094e-14	2.10755e-12	11.6762
TASOR	0.848763	1.88008e-14	2.12627e-12	11.6724
FAM111B	0.817447	1.94648e-14	2.18659e-12	11.6602
EXO1	0.840506	1.99122e-14	2.20722e-12	11.6562
CCT5	0.766579	1.98797e-14	2.2183e-12	11.654
HEXA	0.859311	2.04135e-14	2.24791e-12	11.6482
HTATIP2	0.853868	2.10897e-14	2.30718e-12	11.6369
DFFA	0.788215	2.14508e-14	2.33145e-12	11.6324
TBC1D31	0.774704	2.18033e-14	2.35447e-12	11.6281
TYMS	0.867466	2.30818e-14	2.47656e-12	11.6062
HIST2H4A	0.789785	2.50389e-14	2.65253e-12	11.5763
AC104389.6	0.826241	2.50133e-14	2.66671e-12	11.574
E2F8	0.855758	2.56385e-14	2.69897e-12	11.5688
KIF2C	0.842354	2.68202e-14	2.80573e-12	11.552
HIST1H2BH	0.769321	2.92095e-14	3.01796e-12	11.5203
MTPN	0.817513	2.91324e-14	3.02869e-12	11.5187
SLBP	0.822808	2.95885e-14	3.03836e-12	11.5174
SOD1	0.805221	3.03537e-14	3.09793e-12	11.5089
DTL	0.8029	3.0548e-14	3.09886e-12	11.5088
EIF2S1	0.663543	3.09873e-14	3.12449e-12	11.5052
IPO9	0.743896	3.13918e-14	3.1276e-12	11.5048
CHML	0.905966	3.13606e-14	3.14319e-12	11.5026
SPPL2A	0.674649	3.32136e-14	3.28953e-12	11.4829
PPP4C	0.799465	3.55466e-14	3.49988e-12	11.4559
ATL3	0.802279	3.61939e-14	3.54277e-12	11.4507
H2AFZ	0.786517	3.69801e-14	3.59868e-12	11.4439
CENPK	0.899422	3.75175e-14	3.62987e-12	11.4401
HIST1H1C	0.812785	3.8181e-14	3.67284e-12	11.435
DEPDC1B	0.878723	3.96444e-14	3.79182e-12	11.4212
CD3E	0.84024	4.01007e-14	3.81367e-12	11.4187
VPS72	0.769242	4.04662e-14	3.82669e-12	11.4172
EXOSC9	0.669456	4.23674e-14	3.98396e-12	11.3997
PWP1	0.666032	4.34216e-14	4.01542e-12	11.3963
CCDC34	0.868167	4.30076e-14	4.02157e-12	11.3956
GAPDH	0.785782	4.33988e-14	4.03561e-12	11.3941
MCM6	0.71265	4.40953e-14	4.05531e-12	11.392
FKBP1A	0.806007	4.4918e-14	4.1084e-12	11.3863
CCT2	0.698604	4.57109e-14	4.1582e-12	11.3811
KIF23	0.875347	4.66276e-14	4.17354e-12	11.3795
AURKA	0.753384	4.65554e-14	4.18948e-12	11.3778
CDC25C	0.85019	4.64581e-14	4.20333e-12	11.3764
MCM4	0.776133	4.74599e-14	4.22544e-12	11.3741
UBE2A	0.821162	4.87742e-14	4.31948e-12	11.3646
NCAPG	0.793322	4.95033e-14	4.36098e-12	11.3604
EIF4G2	0.799041	5.15403e-14	4.51666e-12	11.3452
TMOD3	0.866894	5.19594e-14	4.52967e-12	11.3439
C1orf112	0.822297	5.33257e-14	4.60085e-12	11.3372
MRPL24	0.706208	5.33033e-14	4.62275e-12	11.3351
MAGEA12	0.797268	5.55379e-14	4.76715e-12	11.3217
ZWINT	0.86312	5.58968e-14	4.77347e-12	11.3212
PTTG1	0.816167	5.70789e-14	4.84968e-12	11.3143
HIST2H3A	0.783491	5.86027e-14	4.954e-12	11.305
CHRM3	0.801257	6.15564e-14	5.17754e-12	11.2859
SLCO1A2	0.806601	6.26154e-14	5.1884e-12	11.285
RNPEP	0.850175	6.20269e-14	5.19103e-12	11.2847
HPS3	0.712916	6.23544e-14	5.19248e-12	11.2846
CKAP2	0.806499	6.58841e-14	5.43236e-12	11.265
ARNT	0.824462	6.75525e-14	5.54262e-12	11.2563
OIP5	0.777865	6.85441e-14	5.59654e-12	11.2521
PSMD14	0.763581	7.05167e-14	5.72965e-12	11.2419
YWHAB	0.807964	7.20753e-14	5.828e-12	11.2345
NDC80	0.864261	7.29265e-14	5.86848e-12	11.2315
FANCM	0.721689	7.50584e-14	6.01114e-12	11.221
PSME2	0.843408	7.93057e-14	6.32105e-12	11.1992
PSMA5	0.751682	8.73509e-14	6.86422e-12	11.1634
FAM49B	0.82023	8.70679e-14	6.87426e-12	11.1628
G6PD	0.774994	8.69491e-14	6.89741e-12	11.1613
CCT6A	0.629547	8.86287e-14	6.93209e-12	11.1591
HAUS4	0.72554	9.00483e-14	6.97791e-12	11.1563
ANP32A	0.833601	8.9927e-14	7.00092e-12	11.1548
DIAPH3	0.815432	9.22297e-14	7.11401e-12	11.1479
LDHB	0.769198	9.89323e-14	7.596e-12	11.1194
PBK	0.811097	1.01208e-13	7.73525e-12	11.1115
PRDX6	0.788387	1.05249e-13	8.00752e-12	11.0965
DEPDC1	0.827826	1.09657e-13	8.30514e-12	11.0807
TMPO	0.816056	1.1032e-13	8.31773e-12	11.08
TOPBP1	0.74902	1.15289e-13	8.65339e-12	11.0628
NUF2	0.860921	1.20205e-13	8.98207e-12	11.0466
ATAD5	0.818157	1.20831e-13	8.98872e-12	11.0463
HIST1H2BI	0.759796	1.23363e-13	9.1365e-12	11.0392
RBM34	0.801699	1.25584e-13	9.26004e-12	11.0334
TPI1	0.777085	1.2872e-13	9.44961e-12	11.0246
EIF6	0.729783	1.29686e-13	9.47897e-12	11.0232
PSMD13	0.801882	1.32076e-13	9.57005e-12	11.0191
PABPC4L	0.829329	1.31936e-13	9.60152e-12	11.0177
NOL10	0.75682	1.44874e-13	1.04522e-11	10.9808
PAGE5	0.771141	1.52919e-13	1.09852e-11	10.9592
PPP1CA	0.799768	1.59494e-13	1.13601e-11	10.9446
TK1	0.79369	1.59429e-13	1.14039e-11	10.9429
ATP13A3	0.740512	1.68676e-13	1.19126e-11	10.924
PARK7	0.813985	1.67987e-13	1.19143e-11	10.9239
YBX1	0.772043	1.70068e-13	1.19605e-11	10.9223
KPNA2	0.652197	1.7458e-13	1.22265e-11	10.9127
CR589904.2	0.802323	1.87307e-13	1.30631e-11	10.884
DSCC1	0.801812	1.88502e-13	1.30919e-11	10.883
PTPN11	0.833654	1.97592e-13	1.36665e-11	10.8643
MRPL9	0.695838	2.28544e-13	1.57423e-11	10.8029
CDC123	0.758881	2.36639e-13	1.62331e-11	10.7896
UXS1	0.715842	2.41611e-13	1.65065e-11	10.7823
RBM8A	0.774593	2.44118e-13	1.66099e-11	10.7796
CYC1	0.671988	2.62175e-13	1.77664e-11	10.7504
RCN2	0.825138	2.73618e-13	1.8467e-11	10.7336
ESCO2	0.797282	2.76892e-13	1.86129e-11	10.7302
CALM2	0.835368	2.83287e-13	1.89666e-11	10.722
HMMR	0.754213	2.88614e-13	1.92463e-11	10.7157
UCHL5	0.646073	2.95397e-13	1.96204e-11	10.7073
ATP5PD	0.7517	3.24415e-13	2.14627e-11	10.6683
HNRNPK	0.782998	3.34415e-13	2.20371e-11	10.6568
AK2	0.824379	3.50039e-13	2.28865e-11	10.6404
KCTD20	0.66581	3.49703e-13	2.29542e-11	10.6391
GLMP	0.8948	3.71662e-13	2.4112e-11	10.6178
MTCH2	0.726668	3.71636e-13	2.4204e-11	10.6161
WDHD1	0.780735	3.7515e-13	2.42442e-11	10.6154
MAD2L1	0.745624	3.80397e-13	2.44888e-11	10.611
UQCRC1	0.711903	3.96108e-13	2.54025e-11	10.5951
FEN1	0.654519	4.09712e-13	2.61746e-11	10.5821
ARHGEF2	0.810298	4.19372e-13	2.66899e-11	10.5737
POC1A	0.871195	4.29172e-13	2.72102e-11	10.5653
SPC24	0.727608	4.32757e-13	2.72312e-11	10.5649
PCNA	0.771853	4.32704e-13	2.73306e-11	10.5634
HIST1H2AG	0.766473	4.45569e-13	2.79323e-11	10.5539
ATP1B3	0.750456	4.62061e-13	2.87509e-11	10.5413
DDX53	0.80192	4.61019e-13	2.87931e-11	10.5407
XAGE1B	0.752124	4.68884e-13	2.90673e-11	10.5366
HIST1H2BC	0.756748	4.76574e-13	2.94351e-11	10.5311
PSMC3	0.760721	4.81833e-13	2.96505e-11	10.528
SERF2	0.779047	4.848e-13	2.97237e-11	10.5269
HTATSF1	0.796699	4.99493e-13	3.04019e-11	10.5171
RAN	0.744065	4.9921e-13	3.04955e-11	10.5158
HIST1H3G	0.836583	5.19373e-13	3.14973e-11	10.5017
NCAPG2	0.711891	5.29731e-13	3.20095e-11	10.4947
PFN1	0.764687	5.46403e-13	3.28982e-11	10.4828
BZW1	0.628863	5.54976e-13	3.32946e-11	10.4776
KIF18B	0.806299	5.57656e-13	3.33359e-11	10.4771
DNA2	0.767436	5.62072e-13	3.34803e-11	10.4752
PSMA4	0.728389	6.11731e-13	3.61808e-11	10.4415
CLSPN	0.736166	6.18272e-13	3.6184e-11	10.4415
LMNB1	0.75163	6.09849e-13	3.61974e-11	10.4413
PSMA1	0.705608	6.1761e-13	3.62721e-11	10.4404
SPG21	0.709144	6.22437e-13	3.63009e-11	10.4401
TAGLN2	0.752454	6.25071e-13	3.63279e-11	10.4398
CPSF3	0.789823	6.16548e-13	3.63373e-11	10.4396
TFDP1	0.736673	6.3649e-13	3.68636e-11	10.4334
TNFRSF13C	-0.738135	6.45653e-13	3.72653e-11	10.4287
CDCA4	0.821757	6.70694e-13	3.84455e-11	10.4152
KIF20B	0.78776	6.68994e-13	3.84798e-11	10.4148
PDCD6	0.696684	7.0798e-13	4.04443e-11	10.3931
PSMA6	0.748503	7.17386e-13	4.08422e-11	10.3889
SERBP1	0.757173	7.5308e-13	4.2729e-11	10.3693
MAGEA3	0.718257	7.78395e-13	4.40161e-11	10.3564
RO60	0.738124	7.98264e-13	4.49877e-11	10.3469
ARPC1B	0.766398	8.10694e-13	4.53826e-11	10.3431
PLK4	0.850314	8.10059e-13	4.54992e-11	10.342
SMC2	0.737525	8.55984e-13	4.75995e-11	10.3224
ACTR3	0.751969	8.55575e-13	4.77354e-11	10.3212
CTAG1A	0.782519	8.69378e-13	4.81842e-11	10.3171
DDX59	0.679996	9.09768e-13	5.02564e-11	10.2988
ARPC3	0.783817	9.38317e-13	5.1663e-11	10.2868
CSAG1	0.757606	9.42838e-13	5.17417e-11	10.2862
C18orf54	0.78971	9.49207e-13	5.1921e-11	10.2847
PSMC5	0.779337	9.97106e-13	5.38373e-11	10.2689
ZCRB1	0.805793	9.95615e-13	5.39308e-11	10.2682
BUB1B	0.807571	9.89419e-13	5.39443e-11	10.2681
MAGEA6	0.750534	9.92944e-13	5.39607e-11	10.2679
CDC42SE1	0.793276	1.01225e-12	5.44793e-11	10.2638
PRR11	0.759796	1.03541e-12	5.55469e-11	10.2553
ATXN10	0.689262	1.0858e-12	5.80643e-11	10.2361
RABIF	0.765359	1.2053e-12	6.42496e-11	10.1921
BCCIP	0.731391	1.23216e-12	6.54725e-11	10.1839
RNASEH2C	0.773472	1.28502e-12	6.80651e-11	10.1671
H2AFV	0.868111	1.30609e-12	6.89634e-11	10.1614
ANXA2	0.754436	1.36306e-12	7.15203e-11	10.1456
ETFA	0.737381	1.36275e-12	7.17288e-11	10.1443
POLD2	0.719005	1.39369e-12	7.26718e-11	10.1386
STK26	0.813113	1.39073e-12	7.27441e-11	10.1382
HIST1H2BF	0.750073	1.4136e-12	7.34809e-11	10.1338
HNRNPLL	0.764034	1.41981e-12	7.35751e-11	10.1333
NDUFS6	0.697643	1.44897e-12	7.48544e-11	10.1258
STAU2	0.699507	1.45797e-12	7.50876e-11	10.1244
UBE2T	0.767209	1.46345e-12	7.51388e-11	10.1241
UBA3	0.669113	1.4881e-12	7.61709e-11	10.1182
YIF1B	0.765543	1.50544e-12	7.68233e-11	10.1145
PGK1	0.742424	1.52802e-12	7.77387e-11	10.1094
GBA	0.678532	1.55421e-12	7.88315e-11	10.1033
SEMA3A	0.732004	1.56337e-12	7.90564e-11	10.1021
TENM1	0.773889	1.59012e-12	8.0167e-11	10.096
TUBA1C	0.674713	1.65464e-12	8.31692e-11	10.08
HIST1H1E	0.771803	1.67335e-12	8.38578e-11	10.0765
THOC5	0.749461	1.70474e-12	8.51758e-11	10.0697
UTP3	0.753685	1.71035e-12	8.52021e-11	10.0695
PKHD1	0.743549	1.74195e-12	8.65188e-11	10.0629
HEATR1	0.655554	1.75711e-12	8.67565e-11	10.0617
CARHSP1	0.653947	1.75674e-12	8.69948e-11	10.0605
CHCHD2	0.747817	1.78651e-12	8.7949e-11	10.0558
TBL1XR1	0.780494	1.79896e-12	8.8302e-11	10.054
SUZ12	0.769495	1.81558e-12	8.85981e-11	10.0526
LAMTOR1	0.669751	1.81519e-12	8.88383e-11	10.0514
QSOX1	0.759837	1.86055e-12	9.05285e-11	10.0432
PPM1B	0.782271	1.88111e-12	9.1264e-11	10.0397
CARNMT1	0.751414	1.93325e-12	9.35225e-11	10.0291
LYAR	0.679221	1.99405e-12	9.59094e-11	10.0181
RNF115	0.772559	1.99067e-12	9.60224e-11	10.0176
SNX8	0.870115	2.0752e-12	9.95264e-11	10.0021
GABRA3	0.745728	2.12649e-12	1.01405e-10	9.99394
CENPU	0.776921	2.12397e-12	1.01575e-10	9.99322
ORC1	0.758691	2.1484e-12	1.02159e-10	9.99072
ABCF2	0.652716	2.15994e-12	1.02417e-10	9.98963
NCALD	0.761228	2.1722e-12	1.02707e-10	9.9884
CDCA8	0.81926	2.18482e-12	1.03013e-10	9.98711
BNIP2	0.73061	2.21279e-12	1.04038e-10	9.98281
PLCB1	0.768591	2.27837e-12	1.06822e-10	9.97134
PTBP3	0.77003	2.31962e-12	1.0815e-10	9.96597
ADGRL3	0.72766	2.31718e-12	1.08338e-10	9.96522
SETD3	0.787404	2.43818e-12	1.13362e-10	9.94553
COPA	0.752087	2.46232e-12	1.13538e-10	9.94486
RPA3	0.773616	2.45892e-12	1.13694e-10	9.94426
FLOT1	0.804476	2.47277e-12	1.13706e-10	9.94421
ILF2	0.745375	2.45495e-12	1.13826e-10	9.94376
UGT2A1	0.785926	2.49197e-12	1.14275e-10	9.94205
DARS	0.747657	2.54778e-12	1.16515e-10	9.93362
APLP2	0.793624	2.55721e-12	1.16628e-10	9.9332
CENPE	0.747382	2.58695e-12	1.17664e-10	9.92936
GUSB	0.735283	2.63722e-12	1.19625e-10	9.92218
BABAM1	0.706467	2.72884e-12	1.23447e-10	9.90852
SET	0.773331	2.75331e-12	1.24218e-10	9.90582
HIST1H2BO	0.786894	2.81468e-12	1.26306e-10	9.89858
BROX	0.738982	2.80942e-12	1.26409e-10	9.89822
UBL5	0.680742	2.91558e-12	1.30484e-10	9.88444
HIST1H4C	0.804691	2.94279e-12	1.3135e-10	9.88157
ACTR2	0.779136	2.9914e-12	1.33165e-10	9.87561
C6orf62	0.705532	3.01232e-12	1.33387e-10	9.87489
CDC42	0.772013	3.00866e-12	1.33578e-10	9.87426
PUF60	0.745902	3.03082e-12	1.33852e-10	9.87338
WDR72	0.76595	3.06668e-12	1.35079e-10	9.86941
PLSCR1	0.756487	3.15236e-12	1.38489e-10	9.85859
ENSA	0.760771	3.17628e-12	1.39174e-10	9.85644
ATIC	0.662962	3.32296e-12	1.45221e-10	9.83797
RTF2	0.740951	3.33948e-12	1.45563e-10	9.83695
NTPCR	0.882421	3.40193e-12	1.479e-10	9.83003
RALBP1	0.75112	3.50228e-12	1.51868e-10	9.81853
NXPE3	0.729996	3.57112e-12	1.54453e-10	9.8112
PHB	0.737016	3.61168e-12	1.55805e-10	9.80742
RHOA	0.818716	3.63645e-12	1.5647e-10	9.80557
COA6	0.772311	3.75076e-12	1.60154e-10	9.79546
SKA3	0.779774	3.73649e-12	1.60363e-10	9.7949
NEIL3	0.820916	3.74788e-12	1.6044e-10	9.79469
ADAR	0.764908	3.92774e-12	1.67284e-10	9.77655
PPP4R3C	0.75763	3.96666e-12	1.68086e-10	9.77447
MKI67	0.725244	3.96635e-12	1.685e-10	9.7734
MND1	0.7641	4.01002e-12	1.69067e-10	9.77194
AP1S1	0.718846	4.0073e-12	1.69379e-10	9.77114
POPDC3	0.758034	4.10432e-12	1.71745e-10	9.76512
C3orf67	0.733877	4.0878e-12	1.71914e-10	9.76469
COX11	0.710703	4.10111e-12	1.72041e-10	9.76437
TOMM22	0.781098	4.16883e-12	1.7401e-10	9.75943
MPC2	0.710343	4.18247e-12	1.74145e-10	9.75909
TMEM106C	0.788711	4.2086e-12	1.74798e-10	9.75746
AGTRAP	0.724241	4.44004e-12	1.83954e-10	9.73529
NONO	0.723753	4.52119e-12	1.86853e-10	9.7285
MRPL21	0.769167	4.57532e-12	1.88625e-10	9.7244
NECAP2	0.666078	4.65045e-12	1.90783e-10	9.71946
TIPRL	0.703197	4.64329e-12	1.90957e-10	9.71906
PRMT5	0.694398	4.7263e-12	1.9342e-10	9.7135
DYNC1LI1	0.720188	4.74675e-12	1.93783e-10	9.71268
HIST1H2BK	0.751543	4.85275e-12	1.97629e-10	9.70415
KBTBD2	0.631388	5.01317e-12	2.03666e-10	9.69108
CNOT10	0.656798	5.08507e-12	2.06087e-10	9.68595
DDT	0.606612	5.17524e-12	2.09235e-10	9.67937
HNRNPR	0.712973	5.25438e-12	2.11922e-10	9.67382
ZBTB44	0.7449	5.29958e-12	2.13232e-10	9.67115
HNRNPL	0.758056	5.38226e-12	2.16039e-10	9.66547
BZW2	0.633681	5.51481e-12	2.2083e-10	9.65594
STK38	0.684281	5.56982e-12	2.21443e-10	9.65474
SMARCE1	0.737466	5.55897e-12	2.21538e-10	9.65455
TARBP1	0.773942	5.55769e-12	2.22016e-10	9.65362
GAGE1	0.762758	5.6251e-12	2.23111e-10	9.65148
PLK1	0.825565	5.69302e-12	2.2474e-10	9.64832
NUP205	0.714829	5.68937e-12	2.25127e-10	9.64757
ATP6V1E1	0.610615	5.84892e-12	2.30351e-10	9.63761
VPS4B	0.66765	6.00565e-12	2.35968e-10	9.62715
NELFCD	0.655205	6.06358e-12	2.37687e-10	9.624
EBNA1BP2	0.745719	6.0895e-12	2.38145e-10	9.62316
PUM2	0.70689	6.13516e-12	2.39371e-10	9.62093
NDUFB9	0.724645	6.18789e-12	2.40867e-10	9.61822
PPT1	0.836413	6.31536e-12	2.45259e-10	9.61038
TRAK2	0.661629	6.4686e-12	2.5005e-10	9.60197
HMGN1	0.740795	6.49229e-12	2.50387e-10	9.60139
CAPRIN1	0.749478	6.46711e-12	2.50571e-10	9.60107
FANCI	0.771518	6.51989e-12	2.50873e-10	9.60055
AP2M1	0.749975	6.65755e-12	2.55583e-10	9.59247
MAZ	0.712926	6.67664e-12	2.55729e-10	9.59222
MIEN1	0.78493	6.77438e-12	2.5888e-10	9.5869
CKAP2L	0.797292	6.85127e-12	2.61222e-10	9.58299
RHOC	0.808418	6.98456e-12	2.65097e-10	9.5766
SELENOH	0.743771	6.97568e-12	2.65361e-10	9.57616
DKC1	0.704943	7.02973e-12	2.66207e-10	9.57478
EFTUD2	0.639009	7.11904e-12	2.68981e-10	9.57028
ALDOA	0.721036	7.18915e-12	2.71018e-10	9.567
SNX17	0.734379	7.2654e-12	2.73277e-10	9.5634
CDCA3	0.809979	7.38176e-12	2.77031e-10	9.55747
NCAPH	0.801731	7.49333e-12	2.80589e-10	9.55193
XRCC5	0.773905	7.56366e-12	2.82591e-10	9.54884
JTB	0.646024	7.60311e-12	2.83432e-10	9.54755
AHCY	0.662563	7.65884e-12	2.84875e-10	9.54535
YY1AP1	0.734286	7.81751e-12	2.8949e-10	9.53837
PDHX	0.613	7.81748e-12	2.90131e-10	9.53741
AAGAB	0.771148	7.91866e-12	2.92588e-10	9.53374
XRN2	0.755025	8.0563e-12	2.97019e-10	9.52722
DHX40	0.763041	8.22154e-12	3.02444e-10	9.51935
UFC1	0.700502	8.28343e-12	3.04053e-10	9.51705
FRG1	0.679922	8.37608e-12	3.06781e-10	9.51317
CEP97	0.670098	8.3945e-12	3.06784e-10	9.51317
SPC25	0.800493	8.5098e-12	3.1032e-10	9.50819
CDYL	0.761786	8.57024e-12	3.11845e-10	9.50606
ANKRD27	0.695021	8.71831e-12	3.16545e-10	9.49957
PSMD2	0.71809	8.7737e-12	3.17866e-10	9.49776
C1orf43	0.64834	9.09379e-12	3.28751e-10	9.48313
DCP2	0.620786	9.41513e-12	3.39635e-10	9.46899
PPP1R14B	0.719467	9.46406e-12	3.40666e-10	9.46767
PA2G4	0.724558	9.94819e-12	3.57324e-10	9.44694
CSTF2	0.661208	1.03557e-11	3.71166e-10	9.43043
PARG	0.702176	1.06675e-11	3.79092e-10	9.42125
KIF15	0.752389	1.06523e-11	3.79357e-10	9.42095
COX6C	0.742102	1.06505e-11	3.80104e-10	9.4201
HPRT1	0.775415	1.06338e-11	3.80319e-10	9.41985
SGO1	0.761572	1.07841e-11	3.82425e-10	9.41745
HADHB	0.764653	1.10052e-11	3.86174e-10	9.41322
PGD	0.736627	1.09312e-11	3.86821e-10	9.41249
SSB	0.702173	1.10024e-11	3.86887e-10	9.41242
PARPBP	0.764307	1.09985e-11	3.87562e-10	9.41166
NOP10	0.714337	1.09873e-11	3.87986e-10	9.41118
GGH	0.675017	1.11096e-11	3.89022e-10	9.41003
BTBD1	0.709685	1.11746e-11	3.90483e-10	9.4084
UBA2	0.663868	1.12133e-11	3.91018e-10	9.4078
MYD88	0.694898	1.13536e-11	3.95087e-10	9.40331
ECT2	0.824793	1.15871e-11	4.02374e-10	9.39537
KCTD10	0.720041	1.17058e-11	4.05655e-10	9.39184
HIST1H1B	0.759909	1.19337e-11	4.12699e-10	9.38437
NTAN1	0.762152	1.26981e-11	4.37326e-10	9.3592
IQGAP3	0.767257	1.26768e-11	4.37495e-10	9.35903
LRPPRC	0.726592	1.28146e-11	4.40434e-10	9.35612
ELK1	0.774729	1.29296e-11	4.43473e-10	9.35313
CCNF	0.749893	1.29918e-11	4.4379e-10	9.35282
OXCT1	0.708919	1.29874e-11	4.44547e-10	9.35208
KIF5B	0.740478	1.31816e-11	4.49356e-10	9.34741
METTL26	0.699755	1.33797e-11	4.55183e-10	9.34181
HIST1H2BN	0.736966	1.36326e-11	4.62844e-10	9.33457
RAB11A	0.762956	1.37599e-11	4.6528e-10	9.33229
NXPE1	-0.722741	1.38117e-11	4.6609e-10	9.33153
WDR46	0.666601	1.37584e-11	4.6617e-10	9.33146
PGAM1	0.719065	1.42307e-11	4.79261e-10	9.31943
GLRX5	0.729674	1.43795e-11	4.83302e-10	9.31578
TICRR	0.731153	1.44229e-11	4.83788e-10	9.31535
PIGC	0.706623	1.46216e-11	4.89474e-10	9.31027
STAT1	0.750613	1.46864e-11	4.9066e-10	9.30922
POLR3GL	0.675903	1.49531e-11	4.98576e-10	9.30227
PIN1	0.613723	1.50055e-11	4.99329e-10	9.30161
EMB	0.677005	1.54391e-11	5.12738e-10	9.2901
ZNF22	0.64177	1.55987e-11	5.17012e-10	9.2865
UBE2J2	0.715023	1.61782e-11	5.35159e-10	9.27152
CSE1L	0.71267	1.62594e-11	5.36786e-10	9.2702
GINS3	0.750534	1.64031e-11	5.38342e-10	9.26894
TBCB	0.696652	1.6401e-11	5.39332e-10	9.26814
MSN	0.722212	1.63934e-11	5.40144e-10	9.26749
CT47B1	0.785344	1.66963e-11	5.46893e-10	9.2621
BRI3BP	0.839487	1.68891e-11	5.52129e-10	9.25796
PSMB7	0.627342	1.71604e-11	5.59903e-10	9.25189
DNAJC9	0.590574	1.73317e-11	5.64394e-10	9.24842
TXNRD1	0.629881	1.74843e-11	5.68255e-10	9.24546
NELFE	0.736708	1.75212e-11	5.68353e-10	9.24538
ATE1	0.75104	1.76403e-11	5.71108e-10	9.24328
RUVBL1	0.674934	1.78582e-11	5.77047e-10	9.23879
HBG2	0.716138	1.84244e-11	5.91915e-10	9.22774
TRIP4	0.748663	1.8361e-11	5.92153e-10	9.22757
RBL1	0.702744	1.84176e-11	5.92833e-10	9.22707
GCA	0.728417	1.86492e-11	5.97988e-10	9.22331
ABCE1	0.644277	1.91455e-11	6.11559e-10	9.21356
SUV39H2	0.730987	1.91205e-11	6.11928e-10	9.2133
PPP2R1B	0.675386	1.93067e-11	6.15533e-10	9.21075
DRG1	0.677405	1.94397e-11	6.18595e-10	9.20859
ZDHHC12	0.707055	1.95754e-11	6.21733e-10	9.2064
PSMC2	0.696251	1.98477e-11	6.29187e-10	9.20122
STX6	0.713558	1.99552e-11	6.31398e-10	9.1997
TM7SF3	0.686298	2.01306e-11	6.35748e-10	9.19672
GCLC	0.637199	2.04039e-11	6.43166e-10	9.19168
ATP5F1E	0.779492	2.06261e-11	6.48945e-10	9.18779
TTC1	0.626277	2.06795e-11	6.49406e-10	9.18748
EID1	0.727775	2.10117e-11	6.58604e-10	9.18138
TRAFD1	0.756326	2.14796e-11	6.7201e-10	9.17262
RPL7L1	0.672992	2.15374e-11	6.72563e-10	9.17227
SELL	0.774454	2.17311e-11	6.77348e-10	9.16919
NUDT3	0.781458	2.23031e-11	6.93882e-10	9.15871
UBFD1	0.654684	2.259e-11	7.01505e-10	9.15397
NDUFA4	0.639821	2.34021e-11	7.25378e-10	9.13944
SKA1	0.719467	2.35535e-11	7.28722e-10	9.13744
NDUFS5	0.644156	2.39311e-11	7.39037e-10	9.13133
SNRNP40	0.622609	2.42059e-11	7.46148e-10	9.12717
POLE3	0.722659	2.48613e-11	7.6494e-10	9.11637
RAC2	0.729462	2.50908e-11	7.70588e-10	9.11318
GINS1	0.722209	2.53748e-11	7.77881e-10	9.10909
PSME1	0.777662	2.55761e-11	7.82618e-10	9.10645
OPA1	0.694027	2.56596e-11	7.83741e-10	9.10583
HIST1H2BD	0.73667	2.60145e-11	7.93134e-10	9.10065
SSRP1	0.702373	2.63407e-11	8.01619e-10	9.09603
ARF3	0.737003	2.6446e-11	8.03363e-10	9.09509
SRSF3	0.584602	2.70946e-11	8.21575e-10	9.08535
LBR	0.750571	2.79866e-11	8.47087e-10	9.07207
POMK	0.763189	2.81389e-11	8.5016e-10	9.0705
PIR	0.78687	2.83247e-11	8.54232e-10	9.06842
PIP5K1A	0.70507	2.84003e-11	8.54972e-10	9.06805
ANLN	0.753347	2.85036e-11	8.55006e-10	9.06803
SPA17	0.730565	2.84958e-11	8.56306e-10	9.06737
DMD	0.811727	2.87296e-11	8.60243e-10	9.06538
DHTKD1	0.694934	2.93556e-11	8.75854e-10	9.05757
DDX52	0.659692	2.94774e-11	8.76365e-10	9.05732
HELLS	0.674019	2.93499e-11	8.77248e-10	9.05688
GINS2	0.747196	2.94718e-11	8.77756e-10	9.05663
DDB1	0.691342	2.96608e-11	8.80254e-10	9.05539
AGFG1	0.634478	2.97431e-11	8.81133e-10	9.05496
TPGS2	0.738675	2.98583e-11	8.81425e-10	9.05481
NCAPD2	0.666771	2.98499e-11	8.82734e-10	9.05417
VPS33A	0.795502	3.02594e-11	8.91693e-10	9.04978
ADSL	0.810087	3.04829e-11	8.95127e-10	9.04812
FAM72D	0.690639	3.0443e-11	8.95526e-10	9.04792
CENPI	0.741536	3.10512e-11	9.1022e-10	9.04085
COX20	0.681232	3.17047e-11	9.27752e-10	9.03257
CSGALNACT2	0.696998	3.30608e-11	9.65745e-10	9.01514
RPRD1A	0.660759	3.32488e-11	9.69544e-10	9.01343
WDR76	0.703374	3.46707e-11	1.00925e-09	8.996
SDHB	0.723299	3.56417e-11	1.03571e-09	8.98476
TTL	0.711242	3.63232e-11	1.05005e-09	8.97879
NAA15	0.564156	3.62246e-11	1.05083e-09	8.97847
ETF1	0.754141	3.62899e-11	1.0509e-09	8.97844
CIP2A	0.712557	3.70197e-11	1.06834e-09	8.97129
ATP5F1C	0.623246	3.76598e-11	1.08494e-09	8.96459
GHITM	0.660433	3.79721e-11	1.09206e-09	8.96175
MCM5	0.687857	3.87708e-11	1.11311e-09	8.95346
NARS	0.747781	3.93744e-11	1.12851e-09	8.94749
SLC25A40	0.71585	3.95471e-11	1.13152e-09	8.94634
USP32	0.641542	3.98365e-11	1.13785e-09	8.94391
EGLN1	0.706941	4.02061e-11	1.14646e-09	8.94064
TAF9	0.669821	4.08374e-11	1.1605e-09	8.93535
TMX1	0.728547	4.08034e-11	1.16151e-09	8.93498
ELOB	0.68238	4.09709e-11	1.16232e-09	8.93467
COMMD4	0.880406	4.11618e-11	1.16576e-09	8.93339
DGCR6L	0.67887	4.15609e-11	1.17508e-09	8.92993
CHCHD3	0.66849	4.17507e-11	1.17845e-09	8.92869
HNRNPF	0.705787	4.20065e-11	1.18368e-09	8.92677
NQO1	0.743976	4.21113e-11	1.18464e-09	8.92641
KCTD9	0.759551	4.23634e-11	1.18973e-09	8.92455
NCAPD3	0.66879	4.2817e-11	1.20045e-09	8.92065
XK	0.735774	4.31634e-11	1.20814e-09	8.91788
DDX1	0.68021	4.53988e-11	1.26859e-09	8.89668
CHMP5	0.737516	4.57294e-11	1.2757e-09	8.89425
TMCO1	0.65774	4.58326e-11	1.27645e-09	8.894
ASF1B	0.81267	4.61964e-11	1.28444e-09	8.89129
STRN	0.74883	4.63065e-11	1.28537e-09	8.89097
PSMB8	0.703637	4.91726e-11	1.36267e-09	8.86561
KCTD3	0.730606	4.98789e-11	1.37768e-09	8.86085
ZBBX	0.725508	4.98134e-11	1.37814e-09	8.86071
HADHA	0.701761	5.02551e-11	1.38578e-09	8.8583
KYNU	0.7905	5.03718e-11	1.38672e-09	8.85801
TFDP2	0.753427	5.20339e-11	1.43012e-09	8.84463
NDUFS3	0.684078	5.26761e-11	1.4454e-09	8.84001
HIST1H3C	0.692294	5.32119e-11	1.45771e-09	8.83633
CORO1C	0.701265	5.34695e-11	1.46237e-09	8.83494
APRT	0.686614	5.41183e-11	1.4753e-09	8.83112
RAD51AP1	0.782103	5.40767e-11	1.47657e-09	8.83075
RPIA	0.680448	5.47837e-11	1.49101e-09	8.82652
ATOX1	0.638338	5.64861e-11	1.53485e-09	8.81394
NDUFB2	0.644806	5.68391e-11	1.54193e-09	8.81193
PSMA3	0.556862	5.69372e-11	1.5421e-09	8.81189
RACGAP1	0.751633	5.73193e-11	1.54994e-09	8.80969
ETV4	0.692501	5.82635e-11	1.57293e-09	8.80329
MCM7	0.653353	5.90943e-11	1.59279e-09	8.79784
CCNQ	0.596455	5.95855e-11	1.60344e-09	8.79495
NMB	0.615481	6.00933e-11	1.61451e-09	8.79196
MRPL28	0.712644	6.15106e-11	1.64994e-09	8.78253
GZMA	0.728145	6.19046e-11	1.65521e-09	8.78115
CHEK1	0.664367	6.18728e-11	1.657e-09	8.78068
MASTL	0.74787	6.24576e-11	1.66733e-09	8.77798
RBBP7	0.697782	6.27746e-11	1.67312e-09	8.77647
POLD3	0.662459	6.3834e-11	1.69865e-09	8.76989
GMPS	0.654202	6.46033e-11	1.7164e-09	8.76538
POLE2	0.740864	6.53582e-11	1.73096e-09	8.76171
TTK	0.741033	6.53303e-11	1.73296e-09	8.76121
SSX1	0.696824	6.59727e-11	1.74447e-09	8.75834
ATP6V1C1	0.602182	6.64282e-11	1.74823e-09	8.7574
UBL4A	0.682757	6.65422e-11	1.74848e-09	8.75734
ZDHHC3	0.754098	6.63893e-11	1.74996e-09	8.75697
RPP40	0.695233	6.6305e-11	1.75049e-09	8.75684
SLF2	0.655824	6.74898e-11	1.7706e-09	8.75188
SSU72	0.745521	6.82179e-11	1.7869e-09	8.7479
IFI30	0.760589	6.862e-11	1.79463e-09	8.74603
ATP5F1B	0.704583	6.95525e-11	1.81618e-09	8.74084
AVL9	0.629653	6.97754e-11	1.81916e-09	8.74013
CCT7	0.574962	6.99764e-11	1.82156e-09	8.73956
PPP4R3B	0.7565	7.00926e-11	1.82176e-09	8.73951
VDAC3	0.638995	7.06499e-11	1.83055e-09	8.73742
NSDHL	0.703969	7.06364e-11	1.83304e-09	8.73683
NEDD8	0.672875	7.09968e-11	1.8367e-09	8.73596
SOHLH1	0.714966	7.2806e-11	1.87193e-09	8.72771
SPTLC2	0.788903	7.28037e-11	1.87475e-09	8.72706
SRSF1	0.660069	7.27604e-11	1.87652e-09	8.72665
COMMD1	0.609405	7.26642e-11	1.87693e-09	8.72655
CBL	0.770431	7.37414e-11	1.89307e-09	8.72283
[truncated: 16,086 more rows]
