# Supplementary material for: Epigenetic Plasticity Drives Carcinogenesis and Multi-Therapy Resistance in Multiple Myeloma
Source: Research Square preprint supplement (doi:10.21203/rs.3.rs-6306816/v1), 2025-04-15
Supplement: Supplementary file 10 [file 93047513f157cf1e997b3bfc.xlsx]

## Sheet: MGUS_SMM_DOWN
Term	Overlap	P-value	Adjusted P-value	Minus_Log(adj. p value)	Odds Ratio	Combined Score	Genes
GATA1 (C)	105/807	5.56e-12	5.67e-10	9.25	2.25072	58.3298	IFITM3;SPI1;CD83;CSF3R;CD82;LDLRAD3;SLC4A1;LIPA;FAM110A;UBASH3B;SESN3;SLCO2B1;FTH1;TUBB1;ZNF846;RPS6KA1;PIM1;SLC12A7;BAHCC1;GLUL;RGS6;TGM2;IL1R1;C21ORF58;LMO2;RFX2;FRMD4A;ANK1;DOK2;TFR2;CRISPLD2;RIN3;PRKCQ;MAML3;TNIK;ERG;KCNE3;GATA1;PIK3R6;FAM171A1;RAP1A;PRKAR2B;HRH2;SPECC1;NFE2;MICAL2;SLC2A9;PTPRE;DAB2;COL5A1;GNAQ;CASS4;MRVI1;ACVRL1;ACHE;COL18A1;ITGB5;SLC44A2;PLEK;SLC40A1;ARRB1;PTPRJ;SLC2A3;AFF3…
SUZ12 (C)	179/1684	1.68e-11	8.56e-10	9.07	1.82264	45.2206	PHLDB1;CD83;PLXND1;SLC4A4;GLDN;CXCL16;HHAT;RASSF2;UBASH3B;KDR;GRB10;TNFRSF8;CYP1B1;PROK2;PXDC1;CPNE2;RGS6;STK32C;PAQR9;PDGFRA;CARD10;IGFBP5;LIMCH1;IGFBP4;SEMA6D;LMO2;EBF1;FRMD4B;VASH1;TIAM2;CLDN5;RBP4;RAB31;SMO;PLBD1;RIN3;PRKCQ;GRID2IP;FBN2;RTN4R;KCNE3;TSHZ3;DLX5;RRAD;ARX;ALOX15;STK39;LPL;DTX1;LIN7A;LTBP2;AK5;AEBP1;DTX4;RHOBTB1;ITPRIPL2;HRH2;TSPAN2;ST8SIA6;HIVEP3;LONRF3;CD14;WNT1;NTSR1;ZBTB7C;NTN…
GATA2 (C)	92/772	1.1e-08	3.75e-07	6.43	2.01643	36.9451	ACVRL1;ACHE;COL18A1;DOCK5;SPI1;FHL2;DYSF;FHL3;LDLRAD3;SLC4A1;CHD3;LIPA;CXCL2;HK1;FAM110A;LYL1;HHEX;IMPA2;ANPEP;GRAP2;ARHGDIB;PIM1;EFHD2;COTL1;CPNE2;SYNPO;CD34;BAHCC1;TGM2;CMKLR1;EGFL7;IL1R1;STARD8;ITGA2;NCOA4;RFX2;RHOG;ARAP3;FRMD4A;TNFRSF1A;VAV2;MYL4;DOK2;INF2;TFR2;TAL1;NINJ1;CDC42EP1;IRF8;MYH9;PRKCQ;HIST1H2BG;MAPRE2;MGLL;ENG;NNMT;RALB;CEBPE;PTAFR;STK39;ATP10A;CRYBA4;GATA1;FSTL1;DLL1;RASGRP4;PTGS…
RUNX1 (C)	131/1294	2.06e-07	5.26e-06	5.28	1.68825	25.9874	CD81;AQP9;SLA;STMN3;SLC4A1;SLA2;FRY;NYNRIN;VPREB1;SESN3;FTH1;STMN1;PIM1;GRB10;COTL1;HIST3H2BB;MAP3K8;CPNE2;PTGDS;PDGFRB;CARD10;ACSL1;HIST1H2AH;SLC11A1;ARRDC2;LMO2;RNASE6;MATK;FRMD4A;DOK2;TFR2;NINJ1;PADI2;TNIK;EPHA1;VCL;FTL;TTYH3;C5AR1;CDCA7;PDGFB;AEBP1;RASGRP2;STK4;CSF2RA;ADAMTS10;ABR;LOXHD1;TSPAN2;IGFBP7;SLC15A3;HIST1H3B;STAT5A;VASP;NFE2;TNFSF14;RAB27B;PTK2;GNAQ;CASS4;MRVI1;LGMN;ITGB2;PDE3B;ARRB…
SOX2 (C)	80/775	2.69e-05	0.000505	3.3	1.6973	17.8604	TOP2A;NRP2;CD82;STMN3;SNX10;TFCP2L1;MSLN;SPIC;TCL1A;SESN3;BASP1;GRAP2;ENC1;STMN1;HIST1H1D;SIRPA;HIST3H2BB;HIST1H2AG;HIST1H1B;PLEKHG3;PCYT1B;MME;HIST1H2AH;ITGA1;TNFRSF19;IGFBP2;AFAP1;RHOF;PTGR1;ARMCX1;FSCN1;HIST1H2BF;HIST1H2BE;HIST1H2BH;KIFC3;HIST1H2BG;EPHA1;HIST1H2BB;B4GALT6;SKAP2;FTL;SMIM3;RALB;HIST1H2BO;CEBPD;HIST1H2BJ;HIST1H2BL;LEF1;STK39;FBLN1;NREP;STK4;DLL1;SLC7A3;RAB20;HIST1H3A;CALD1;HIST1H…
TP63 (C)	129/1399	2.97e-05	0.000505	3.3	1.51054	15.7473	EXOC3L2;CD82;SIRPD;CLEC10A;PROS1;MLC1;SLA2;SLC4A3;FAM110A;NYNRIN;GRAP2;MYB;ARHGDIB;CYP1B1;TGM2;IER3;CARD10;IL4R;CD93;ACSL1;SERPINF1;USP2;LMO2;RFX2;TTC7B;AFAP1;FRMD4B;TPST2;CLIP2;CRISPLD2;FEZ1;PLBD1;RIN3;PRKCQ;KCTD12;ERG;RIN2;DSC2;KCTD15;PTGES;FBN2;CASZ1;AKNA;EPB42;HTRA3;CDCA7;STK39;SLC1A3;NID1;HCAR3;EFNB1;HRH1;ZFP57;RNF217;TSPAN2;RHBDL1;NGFR;SLC37A2;PARVA;INHBA;CORO2A;CORO2B;SLC2A9;PTPRE;COL5A1;G…
NFE2L2 (C)	98/1022	6.61e-05	0.000962	3.02	1.5671	15.0835	HFE;IRS2;SLC4A4;ETS2;PREX2;SPIC;FTH1;ZNF208;ARHGDIB;GRB10;CYP1B1;PXDC1;G6PD;SERPINF1;SEMA6D;AKR1E2;MPEG1;OSCAR;RAB32;TIAM2;PHOSPHO1;CLDN3;SLPI;FSCN1;FTL;CES1;RAI14;LPL;AK5;DTX4;PRKAR2B;HMOX1;TSPAN2;IGFBP7;FAM43A;ATP8B4;DCLK2;PBX4;ZWINT;COL1A2;COL5A1;BCL6;MRVI1;DOCK5;ITGB2;SLC40A1;PIK3CD;ASGR1;CXCL5;MRC2;HHEX;LBH;SLC22A16;CA2;ENC1;AOX1;LMCD1;CD34;CTSB;PTGIR;ANXA1;MMD;PLAUR;KCNAB1;TMC6;PTGR1;OSMR;D…
FOXM1 (E)	17/95	0.000122	0.0015574	2.81	3.16077	28.4794	HIST1H2AM;CDKN2D;HIST1H2BO;CDCA2;UBE2C;CCNF;CENPA;NCAPH;CDC20;FAM110A;TPX2;KIF18B;CDK1;KIF20A;HIST1H3B;HIST1H2AB;PHF19
NANOG (C)	60/595	0.000487	0.00552402	2.26	1.64149	12.5186	COL18A1;DOCK5;SPARC;FBXO27;SNX10;SLC2A3;TFCP2L1;SPIC;TCL1A;SESN3;BASP1;GRAP2;ENC1;PIM1;SIRPA;GLUL;HIST1H1B;PLEKHG3;PCYT1B;WSB2;IGFBP2;ITGA1;TNFRSF19;NCOA4;AGTRAP;RHOF;COMMD7;HCK;ARMCX1;DPPA4;SMS;MYH9;KIFC3;KCTD15;ITGA9;RAI14;HIST1H2BO;CDCA3;LEF1;DLL1;SLC7A3;ZFP57;RAB20;TSPAN9;CHST10;HIST1H3I;HIST1H3C;SASH1;NQO1;EGLN3;ZFHX3;SRMS;BAIAP2;DHRS3;TSPAN15;SCD;TCEA3;SPRY2;FGFR2;FGFR1
AR (C)	97/1095	0.00112019	0.011426	1.94	1.42894	9.70855	DGKG;EXOC3L4;GPR65;WWC1;F13A1;LDLRAD3;IRS2;CLU;PREX2;GRB10;TNFRSF8;RGS6;IL1R1;SEMA6D;FRMD4B;RAB31;CRISPLD2;KIF20A;MAML3;TNIK;EPHA1;RIN2;VCL;PDE9A;FBN2;CDCA2;TTYH3;NNMT;AKNA;AK5;SPATA6;KALRN;RHOBTB1;TMEM26;FAM171A1;HRH2;CPAMD8;NTNG1;SPECC1;AFAP1L2;ATP8B4;MICAL2;PARVA;GP5;ZWINT;ABTB2;TPX2;MAFB;DIAPH3;UST;FGFR1;PCSK2;NRP1;DOCK5;CXCL8;RASGRF1;MCM10;TFCP2L1;AFF3;CHRDL1;TNFSF13B;THBD;CAPZB;KYNU;SYK;TMC…
SPI1 (C)	92/1056	0.00243984	0.022624	1.65	1.39996	8.42191	CD84;MCTP1;CD82;NCF2;CNRIP1;CLEC10A;ARPC1B;PROS1;NCF4;ITGB2;PLEK;LST1;PIK3CD;SNX10;PTPRJ;ARRB2;GIMAP6;LYL1;HHEX;EFHD2;EMILIN2;MAP3K8;ZNF385A;PTGIR;SYK;IGFBP4;RNASE6;RHOG;ARAP3;RAB3IL1;GMIP;IPCEF1;TNFRSF1A;APBB1IP;TYROBP;CNKSR3;PADI2;LCP2;PRTN3;LCP1;ACPP;HCST;MAPRE2;FTL;ENG;CSF1R;RALB;BCL2A1;PTAFR;GPR84;CFP;STK4;AIF1;PRAM1;RASGRP4;RHOBTB1;PTGS1;HRH1;GNG2;RAB20;SH3BP1;TESPA1;CNR2;SH3TC1;TNNI2;HIST1…
SPI1 (E)	127/1540	0.00299369	0.0254463	1.59	1.32339	7.69055	EPHB6;CD84;LPGAT1;ANKLE1;ZNF570;NCF2;KDM1B;DQX1;PROS1;NCF4;ITGA2B;WDR86;GIMAP6;FAM110A;PYCARD;RASSF2;MAP3K8;SPA17;SERPINF1;RNASE6;IPCEF1;GBGT1;PHOSPHO1;TYROBP;ZNF93;FSCN1;DPEP2;WDFY4;DSC2;SUCNR1;DTX1;RASGRP2;CFP;STK4;CORO1A;NCAPH;RASGRP4;TESPA1;CD14;WNT1;SLC15A3;SIGLEC10;ARPC5;GPR137B;PTPRC;KIF18B;PARVG;VNN2;TNFSF9;HPSE;RGL1;IL7R;ITGAM;HIP1;SLC44A2;PLEK;PIK3CD;SNX10;ARRB2;LYST;SIRPB1;FCAR;LFNG;LY…
IRF8 (C)	16/121	0.00522251	0.0409766	1.39	2.20496	11.5866	CIITA;NCF4;PTPRJ;AIF1;PTK2;TNFSF13B;HK3;ZEB2;PDLIM2;HLA-DMB;ELF4;KYNU;HLA-DRA;SLC15A3;TLR4;GPR18
PPARD (C)	30/285	0.0064058	0.0466709	1.33	1.70722	8.62242	NRP1;RTN1;NEXN;SLC4A4;PREX1;ADAMTS2;IMPA2;FTH1;EPB41L3;SH2B3;ATP9A;E2F8;ABCC3;PDGFRA;ANXA1;VCAM1;MMD;SPNS3;PCOLCE;SLC2A9;CLIP2;TSPAN14;INF2;COL6A2;PMP22;MYH9;PLIN2;ANGPTL4;TGFBI;FTL
ESR1 (C)	18/154	0.0113515	0.0771901	1.11	1.91494	8.57588	RET;AFAP1L2;PLEKHH2;SERPINA1;FHL2;ASGR2;CYP27A1;C3;RAB31;CXCL12;BCL6;CLDN23;NRIP1;PDK4;CYP1B1;KIFC3;LMCD1;GPRC5C
SALL4 (C)	34/355	0.0155022	0.0988265	1.01	1.53637	6.4017	RET;IGSF6;RTN1;SDC4;PDE1B;SLC43A3;UHRF1;PDE3B;NRXN2;MCM10;NREP;NID1;PPP1R9A;PLA2G7;SESN3;TSPAN9;STMN1;ARHGDIB;HMOX1;HIST1H3H;SASH1;PLEKHG3;PCYT1B;ZFHX3;WSB2;MME;NCOA4;RHOF;DEK;DHRS3;FSCN1;SPRY2;PRKCQ;KIFC3
SMAD4 (C)	51/584	0.0197184	0.113181	0.946	1.39057	5.45965	PCSK2;NRP1;NRP2;FHL2;PTPRJ;FRY;ETS2;SLC22A16;MYB;ENC1;SYNPO;NCKAP5;LMCD1;LIMCH1;SEMA6D;ACTN1;AKR1E2;USP2;TTC7B;AFAP1;FRMD4A;PALLD;B3GNT5;KCNMA1;ULK2;CHI3L1;TNIK;ST6GALNAC3;ITGA9;SDC3;LTBP2;AOAH;JAKMIP1;THBS1;KCNMB1;NRIP1;NHS;SASH1;GABRA2;MSR1;AFAP1L2;TCF7L1;LGI2;KRT13;MICAL2;DHRS3;HS3ST2;LRFN2;FAS;FGFR2;FBN1
TCF3 (C)	82/1006	0.0199731	0.113181	0.946	1.29404	5.06405	ITGB5;FBXO27;SNX10;LDLRAD3;TFCP2L1;CHD3;PPP1R9A;SPIC;CAPZB;RASSF3;BASP1;GRAP2;STMN1;PIM1;FAM53B;SIRPA;HIST1H2AG;DLGAP3;BAHCC1;HIST1H1B;PLEKHG3;WSB2;ACTN1;TNFRSF19;TIMD4;FRMD4B;RHOF;TNFRSF1B;HCK;CD200R1;ARMCX1;CLDN3;TFDP1;SLPI;FSCN1;SMS;PLBD1;HIST1H2BE;PLIN2;KIFC3;EPHA1;B4GALT6;FTL;ITGA9;HBEGF;RAI14;HIST1H2BN;CEBPA;HIST1H2BO;UHRF1;LEF1;SLC1A3;NRXN2;AEBP1;DLL1;SLC7A3;PTGS1;LIMA1;GNG2;ZFP57;HIST1H3A…
NELFE (E)	22/234	0.0527444	0.278379	0.555	1.49997	4.41336	HIST1H2BO;HIST1H2AI;HIST1H2BJ;HIST1H2AH;HIST1H2BL;HIST2H2AB;BAIAP2;SDCBP;TUBA1B;STMN1;HIST1H2AE;HIST1H2BF;TNFSF9;HIST3H2BB;HIST1H3H;HIST1H2AG;HIST1H2BG;HIST1H3B;GLUL;HIST1H3D;HIST1H2AB;FTL
KLF4 (C)	77/987	0.054584	0.278379	0.555	1.22976	3.57615	NRP2;CD82;FBXO27;DSCC1;SNX10;PTPRJ;SLC2A3;TFCP2L1;LFNG;PYCARD;TUBA1B;TCL1A;CA2;DPYSL2;MYB;STMN1;RPS6KA1;PIM1;HIST1H2AE;HIST1H1D;SLC12A7;PLEKHG3;PDGFRA;IGFBP5;ACTN1;EBF1;TMC8;IRAK3;TMC6;RHOF;GFRA2;RGMA;BACE2;HCK;B3GNT5;FSCN1;BLVRB;TAGLN2;HIST1H2BG;HIST1H2BN;HIST1H2BM;RTN1;RALB;UHRF1;CDCA7;RASGRP2;HIST1H3A;TSPAN9;HIST1H3G;IGF2BP3;HIST1H3H;S1PR3;APOE;HIST1H3I;WNT1;HIST1H3D;VASP;NGFR;PPP1R14A;GABBR1;…
RELA (E)	40/484	0.0710264	0.344985	0.462	1.3042	3.44922	CIITA;CD83;HIST1H2BO;HIST1H2BJ;NCF2;KDM1B;WWC1;ITGB2;NRXN2;NOD2;TSPAN33;LIMD2;FAM110A;SPIB;GPR132;EPB41L2;TMSB4X;MYB;IL21R;MAP3K8;HIST1H2AG;IKBKE;SH2B3;IER3;VASP;HIST1H2AM;GPR55;SORL1;MMP9;SYTL3;LRG1;NINJ1;FSCN1;FAS;MYH9;HIST1H4I;LCP1;CD69;MYO1G;RBMS3
STAT5A (E)	21/233	0.0813359	0.377103	0.424	1.43067	3.58979	HIST1H2AM;HIST1H2BO;HIST1H3J;HIST1H2AI;HIST1H2BJ;HIST1H2AH;HIST1H2BL;HIST2H2AB;LYL1;BCL6;FTH1;HIST1H2AE;BLVRB;HIST1H3H;HIST1H4I;HIST1H2AG;IGF2BP3;HIST1H2BG;HIST1H3B;HIST1H2AB;PHF19
POU5F1 (C)	22/261	0.128251	0.568764	0.245	1.32857	2.72858	HIST1H2BN;ENTPD1;ZFHX3;HIST1H2BO;TNFRSF19;EBF1;CDCA7;TFCP2L1;DLL1;SLC7A3;SPIC;HCK;TCL1A;SESN3;SCD;GRAP2;TCEA3;SLC19A3;SPRY2;HIST1H3I;FGFR2;HIST1H1B
ZC3H11A (E)	12/129	0.134201	0.570354	0.244	1.47855	2.96954	RNF43;ACHE;ABLIM3;IGFBP4;FES;MYO7A;RHOF;CLU;COMMD7;ASGR1;BEST1;VAV2
TRIM28 (C)	18/210	0.140846	0.574653	0.241	1.35232	2.65067	RET;NNMT;MYO10;PROS1;IGFBP2;NRXN2;HIF1A;DLL1;DIAPH3;RAB20;SESN3;SMO;TAL1;HLX;ENC1;PIM1;IGFBP7;KCTD12
MYOD1 (E)	14/166	0.192828	0.75648	0.121	1.32733	2.18473	SMIM5;SLC37A2;EGLN3;CD82;SDC4;MYBPH;CHD3;RHOBTB1;FAM110A;TTC9;TUBA1B;TPPP3;PCYOX1L;CCDC141
TP53 (C)	24/319	0.258295	0.975783	0.0106	1.17249	1.58715	NTNG1;PDGFRA;APAF1;RRAD;ACTN1;HAAO;EBF1;FHL2;FRMD4A;SKA3;AFF3;RGMA;KITLG;TFDP1;GLIPR2;AXL;CALD1;ENC1;KCNMA1;CDH11;NHS;FAS;SLC12A7;OBSL1
EZH2 (E)	25/338	0.280827	0.999996	1.88e-06	1.15089	1.46164	SHC2;RTN1;PPM1N;ALOX15;LRP4;SOBP;SLC4A4;ADAP2;ORC1;CLTCL1;CPAMD8;RBPMS2;EMILIN2;ZNF77;HBA1;PLXDC1;RBP7;H1F0;SMO;FSCN1;TNFSF9;BLVRB;PIK3AP1;MAPRE2;MYO1F
PPARG (C)	38/535	0.309186	0.999996	1.88e-06	1.1019	1.29343	CLEC10A;LPL;SNX10;IRS2;LTBP2;RETN;DTX4;LIPA;SDCBP;RAB20;RASSF2;SH3TC1;CYP1B1;AOX1;MAP3K8;HIVEP3;CD36;STAT5A;PDGFRA;CARD10;VWF;RNF24;ACSL1;G0S2;DHRS3;FKBP1A;RBP7;FABP4;CCDC80;FABP5;SCD;ULK2;MYH9;PPARG;ANGPTL4;SIGLEC1;CD69;RGL1
HDAC2 (E)	13/175	0.351169	0.999996	1.88e-06	1.15492	1.20861	NQO1;ACTN1;STMN3;ZNF77;ARPC5;DEK;DHRS3;CPPED1;SYT17;NEIL3;TUBA1B;TNIK;RGL1
FOXA1 (E)	15/205	0.356666	0.999996	1.88e-06	1.13627	1.17144	CXCL8;ITGB5;APAF1;PDE1B;ARRDC2;C21ORF58;ARRB2;DHRS3;SELENBP1;BCL6;CALD1;NINJ1;S100P;MAML3;TRIM34
STAT3 (C)	13/177	0.366405	0.999996	1.88e-06	1.14071	1.14529	ZFHX3;NRP2;PTPRS;CCDC68;HAAO;EBF1;ATP10A;PLD1;CYP7B1;BCL6;SH3BP1;PIM1;SKAP2
EZH2 (C)	17/237	0.373996	0.999996	1.88e-06	1.11209	1.09375	ACVRL1;RTN1;DLX5;TESC;PDGFB;NRXN2;DHRS3;RHOBTB1;BMP3;RASSF2;SMO;CAMK4;MYB;SIRPA;CD24;WNT1;TP73
SMC3 (E)	79/1181	0.413428	0.999996	1.88e-06	1.03232	0.911815	EPHB6;ACHE;PHLDB1;LPGAT1;ANKLE1;PTPRJ;ARRB2;SAT1;LYST;CLU;ETS2;ASGR1;THBD;RASSF3;PSTPIP2;BASP1;ENC1;PIM1;FLVCR2;FAM53B;FFAR1;TNFAIP8L2;TGM2;RNF43;IGFBP4;USP2;RHOG;MYO7A;RHOF;PTGR1;RGMA;VAV2;GPRC5B;TBC1D4;BLVRB;BPI;ERP27;RTN4R;SMIM5;C1S;CEBPD;RRAD;NXN;LRP4;NRXN2;PPM1J;LTBP2;ASAP2;DTX4;THBS1;ABR;EFNB1;ABLIM3;OLFML3;TNNI2;WNT1;RILP;NPDC1;NGFR;DMTN;RNF24;CORO2A;PLXDC1;DHRS3;ABTB2;PTPRE;GFI1B;COL1A2;C…
E2F4 (E)	47/710	0.47226	0.999996	1.88e-06	1.01959	0.764924	TOP2A;HIST1H2BN;CDCA2;HIST1H2BO;CDCA3;HIST1H2BJ;UHRF1;DSCC1;HIST1H2BL;CCNF;CDCA7;MCM10;NCAPH;AURKB;FAM110A;CDC20;TUBA1B;HIST1H3A;ORC1;PIM1;HIST1H3G;HIST1H2AG;TK1;HIST1H3B;HIST1H3C;HIST1H3D;E2F8;HIST1H2AB;HIST1H2AI;HIST1H2AH;HIST1H2AJ;PBX3;DEK;TPX2;NEIL3;HIST1H4A;TFDP1;KIF18B;DIAPH3;KIF4A;CDK1;HIST1H2BF;KIF20A;TRIP13;HIST1H2BB;DCP2;PHF19
EGR1 (C)	21/315	0.486173	0.999996	1.88e-06	1.02706	0.740711	MPP1;SPECC1;SERPINA1;RALB;SLC11A1;PLAUR;MMP9;THBS1;HK1;SELENBP1;SDCBP;HHEX;CLDN3;RAB20;TFR2;CALD1;ALPL;PRTN3;LONRF3;LBP;ITGA5
VDR (C)	1976-05-01	0.555546	0.999996	1.88e-06	1.01222	0.594985	SLC37A2;KDM1B;IL21R;CD69;CAMP
CEBPB (E)	9/144	0.598073	0.999996	1.88e-06	0.957895	0.492399	GPR153;SLPI;BCL6;HIST1H2BJ;PALMD;COTL1;HIST1H2AG;MAP3K8;TNFRSF1A
ZEB1 (E)	6/106	0.694776	0.999996	1.88e-06	0.86173	0.313813	WWC1;PCYOX1L;TACC3;FLNA;EPHA1;CUEDC1
RAD21 (E)	78/1265	0.710125	0.999996	1.88e-06	0.940921	0.32209	EPHB6;ACHE;ANKLE1;HIST2H2AB;MCM10;ARRB2;SAT1;CLU;ETS2;LYL1;CA2;PSTPIP2;BASP1;ENC1;FLVCR2;FFAR1;TNFAIP8L2;TGM2;BCAS4;PDGFRA;RNF43;IGFBP5;NCOA4;MYO7A;RHOF;GMIP;PTGR1;SPTB;F5;RGMA;GPRC5B;DOK2;TBC1D4;ELF5;BLVRB;KIF20A;CEACAM8;RTN4R;SMIM5;CEBPD;CEBPE;NXN;LRP4;NRXN2;PPM1J;ASAP2;DTX4;THBS1;ABR;EFNB1;LOXHD1;OLFML3;TNNI2;CHST13;APOE;CD14;WNT1;WASF1;NPDC1;DMTN;ZNF185;RNF24;PLXDC1;SYT17;ABTB2;PTPRE;GFI1B;CO…
ERG (C)	8/144	0.726793	0.999996	1.88e-06	0.844502	0.269493	SESN3;ACSL1;GIMAP1;HIST1H3G;FAM43A;PTPN22;HIST1H2BG;TM6SF1
REST (C)	78/1280	0.747656	0.999996	1.88e-06	0.928383	0.269985	PCSK2;DGKG;CIITA;CSF3R;CNRIP1;CCNF;DYSF;STMN3;LRRC6;ARHGEF10L;GLDN;GLT1D1;HHAT;TCL1A;RIMS3;RASSF3;CHL1;SLCO2B1;ENC1;CA4;KIF13A;GRB10;CYP1B1;DLGAP3;SLC12A7;NCKAP5;STK32C;CMKLR1;APAF1;SEMA6D;SPNS3;ARAP3;OLFM4;IPCEF1;ANK1;RBP7;GPRC5B;PAX8;PITPNM2;CD300E;PADI4;ERG;ST6GALNAC3;TLR4;RTN4R;C1QA;SUCNR1;CTBP2;NRXN2;CRYBA4;PRR5L;CFP;JAKMIP1;OTOA;GNA15;HRH2;HLX;FCGR1A;WASF1;VAT1L;GPIHBP1;NPDC1;GABRA2;PBX3;RA…
FOXA2 (E)	18/316	0.753679	0.999996	1.88e-06	0.866305	0.244981	HIST1H2BN;RNF43;ITGB5;ARRB2;SMARCA1;CXCL2;TSPAN33;DHRS3;SGPP1;LFNG;VNN3;TFF3;CHI3L2;S100P;MAML3;TK1;RIN2;TRIM34
TRIM28 (E)	6/120	0.800395	0.999996	1.88e-06	0.755334	0.168176	TLE2;HIST1H2BJ;GP1BB;DQX1;HIST1H2AG;APOBEC3B
CEBPD (E)	41/734	0.866634	0.999996	1.88e-06	0.845468	0.121019	HIST1H2BO;HIST1H3J;HIST1H2BJ;HIST1H2BL;HIST2H2AB;SLC40A1;HNMT;CXCL2;TUBA1B;HHEX;GPR153;ORC1;FTH1;COTL1;HIST1H2AE;CTSH;MAP3K8;HIST1H3H;HIST1H2AG;LONRF3;HIST1H3B;SH2B3;HIST1H3D;HIST1H2AB;HIST1H2AM;HIST1H2AI;ACTN1;C21ORF58;TNFRSF1A;H1F0;BCL6;FSCN1;TACC3;HIST1H2BF;CASS4;TNFSF9;CDC42EP1;HIST1H2BG;CD68;OBSL1;FTL
SUZ12 (E)	4/105	0.916715	0.999996	1.88e-06	0.567891	0.0493833	TAL1;LONRF3;WNT1;CXCL16
FOSL2 (E)	8/196	0.945267	0.999996	1.88e-06	0.609205	0.034291	TPM2;ITGA2;ASB9;ZYX;CHI3L2;TAGLN2;SERPINB8;PHF19
TAF7 (E)	32/640	0.954931	0.999996	1.88e-06	0.750321	0.0346021	HIST1H2BN;HIST1H2BO;ITGB5;HIST1H3J;HIST1H2BJ;HIST1H2BL;HIST2H2AB;SDCBP;TUBA1B;HIST1H3F;HIST1H2AE;HIST1H1D;HIST1H3H;HIST1H2AG;HIST1H3B;HIST1H3D;HIST1H1B;HIST1H2AB;HIST1H2AM;HIST1H2AL;HIST1H2AI;HIST1H2AH;C21ORF58;CPPED1;CCDC80;ZYX;FSCN1;HIST1H2BF;HIST1H4I;HIST1H2BH;HIST1H2BG;FTL
ZKSCAN1 (E)	4/120	0.957178	0.999996	1.88e-06	0.494058	0.0216228	CAPZB;SH3BP1;CDK2AP1;TNFAIP8L2
CTCF (E)	100/1790	0.957825	0.999996	1.88e-06	0.83801	0.03611	EPHB6;PHLDB1;LPGAT1;ANKLE1;SAT1;CLU;ETS2;BASP1;PIM1;FAM53B;CYP1B1;HIST3H2BB;CPNE2;TGM2;PDGFRA;BIVM;RNF43;IGFBP4;USP2;MYO7A;DOK2;RTN4R;SMIM5;LTBP2;RASGRP2;DTX4;STK4;ABR;EFNB1;WNT1;NGFR;CORO2A;ABTB2;PTPRE;LRFN2;COL1A2;CXCL12;MAFB;GIPC3;SELL;FES;ALPL;ESAM;APOBEC3B;ACHE;HIST2H2AB;ARRB2;ASGR1;LYL1;THBD;CA2;ENC1;FLVCR2;TK1;TNFAIP8L2;FFAR1;ADAMTS7;NCOA4;RHOG;RHOF;PTGR1;SPTB;RGMA;VAV2;GPRC5B;TBC1D4;CDC42…
HNF4A (E)	69/1276	0.958418	0.999996	1.88e-06	0.811653	0.0344718	EXOC3L4;AATK;ARHGEF10L;C4BPB;PYGL;HNMT;ASGR1;ASGR2;RAB42;RASSF4;IMPA2;ANPEP;ENC1;KIF13A;PIM1;AOX1;TK1;ABCC3;SERPINF1;NCOA4;PTGR1;RAB32;CYP27A1;RBP4;FNDC4;INF2;TFDP1;RILPL2;TFR2;NINJ1;RIN3;OBSL1;DSC2;FTL;CES1;CEBPA;TTYH3;RGS19;CCDC68;HAAO;PDGFB;LRP4;CAPG;FBLN1;NLRC4;SAMHD1;NID1;CPN2;C3;LOXHD1;PDLIM2;CHST13;METTL7B;APOE;SLC22A31;SASH1;STAT5B;LAMB2;CORO2A;DHRS3;CPPED1;VIL1;TF;GFI1B;GALE;FES;SCD;PNPL…
IRF1 (E)	11/263	0.959337	0.999996	1.88e-06	0.624206	0.0259125	STAT5A;HIST1H2AM;LRG1;HIST1H2BO;HIST1H2AI;SLC43A3;HIST1H2BL;NRIP1;GNB4;HIST1H3H;TNFRSF1B
REST (E)	16/383	0.980953	0.999996	1.88e-06	0.621957	0.0119607	PCSK2;NPDC1;BEX1;CNRIP1;CLEC10A;PRUNE2;RAB39A;STMN3;HBA2;PRG3;ANK1;HS3ST2;RAB37;DPYSL2;COL5A3;NEFH
NFIC (E)	10/279	0.988474	0.999996	1.88e-06	0.530697	0.00615214	CDCA3;HIST1H2BJ;ARPC1B;ENC1;HIST2H2AB;HIST1H2AG;IGF2BP3;HIST1H3B;CUEDC1;HIST1H2AB
FOXP2 (E)	5/178	0.99169	0.999996	1.88e-06	0.413143	0.00344738	CDKN2D;GALE;SPRY2;IRS2;MAML3
RCOR1 (E)	31/702	0.993386	0.999996	1.88e-06	0.655818	0.00435215	ARPC1B;CCNF;LOXL3;NRXN2;ARRB2;SAT1;HHEX;SH2B3;IER3;SPECC1;RHBDF1;RNF43;RNF24;MMD;RFX2;PBX3;RHOG;DEK;COMMD7;PTK2;ABTB2;FKBP1A;TSPAN14;GFI1B;SYT11;SCD;PCYOX1L;FSCN1;MYH9;MAML3;MEGF9
STAT3 (E)	32/725	0.994129	0.999996	1.88e-06	0.655198	0.00385824	HIST1H2BN;HIST1H2BO;HIST1H2BJ;HIST2H2AB;SAT1;SDCBP;HIST1H3A;RASSF3;BASP1;HIST1H2AE;IGF2BP3;HIST1H2AG;SPA17;HIST1H3B;HIST1H3D;HIST1H2AB;HIST1H2AM;APAF1;HIST1H2AH;G0S2;TNFRSF1A;CTTNBP2NL;HIST1H4A;BCL6;VNN3;HIST1H2BF;KIF20A;HIST1H2BG;DNASE1L3;SKAP2;MYO1G;RBMS3
CBX3 (E)	1981-01-01	0.995742	0.999996	1.88e-06	0.179029	0.000764	APOBEC3B
ZMIZ1 (E)	41/914	0.99679	0.999996	1.88e-06	0.664436	0.00213631	HIST1H2BN;HIST1H2BM;ANKLE1;HIST1H2BO;HIST1H2BJ;CD81;HIST1H2BL;HIST2H2AB;IRS2;SKA3;CENPA;NCAPH;HIST1H3A;HIST1H3F;HIST1H2AE;HIST1H1D;FLNA;HIST3H2BB;HIST1H3H;HIST1H2AG;HIST1H3B;GLUL;HIST1H3D;HIST1H1B;IER3;HIST1H2AB;HIST1H2AI;HIST1H2AH;ARRDC2;HIST1H2AJ;BAIAP2;FKBP1A;H1F0;HIST1H4A;CRYL1;TAGLN2;HIST1H4I;HIST1H2BH;HIST1H2BG;CD68;FTL
BCL3 (E)	8/273	0.997456	0.999996	1.88e-06	0.430393	0.00109644	PYCARD;ROGDI;HIST2H2AB;HIST1H1D;KIFC3;CD68;CUEDC1;IER3
TCF3 (E)	35/840	0.99884	0.999996	1.88e-06	0.614534	0.000713	CD82;KDM1B;SKA3;TSPAN33;HIF1A;THBS1;FAM110A;HIST2H4A;TUBA1B;GPR132;RASSF3;ENC1;STMN1;IL21R;COTL1;CYP1B1;VASP;EGLN3;SLC37A2;GSN;ACSL1;PBX3;RHOF;TNFRSF1B;TPST2;FKBP1A;TTC9;ZYX;TAGLN2;ASB2;GPRC5C;CUEDC1;DNASE1L3;FTL;FBN1
FOS (E)	24/637	0.999154	0.999996	1.88e-06	0.554501	0.000469	TOP2A;HIST1H2BN;CDCA2;CDCA3;HIST1H2BJ;HIST1H2AH;MBOAT2;ZNF77;CENPA;CTTNBP2NL;ABTB2;TPX2;HIST1H4A;PNKD;HIST1H3A;KIF18B;COTL1;HIST1H2BF;MYH9;HIST3H2BB;HIST1H2AG;HIST1H3B;HIST1H3D;HIST1H2AB
TCF7L2 (E)	21/583	0.999317	0.999996	1.88e-06	0.529466	0.000362	DSP;TCF7L2;RNF24;MYO10;HIST1H2BJ;TNFRSF19;PLD1;SAMHD1;CPPED1;ZWINT;SGPP1;PHOSPHO1;BCL6;KIF13A;ATOH8;PIM1;TAGLN2;HIST1H2AG;TRIP13;IKBKE;FTL
ETS1 (E)	2/156	0.999679	0.999996	1.88e-06	0.185407	5.95e-05	IER3;FTL
SRF (E)	7/299	0.999744	0.999996	1.88e-06	0.341007	8.75e-05	MYO1E;GLIPR2;ZYX;FLNA;ARPC5;VCL;CPPED1
ZNF384 (E)	26/730	0.999855	0.999996	1.88e-06	0.521246	7.56e-05	ILK;SLC2A3;ARRB2;CHD3;HIF1A;SAT1;ADAMTS10;TUBA1A;HLX;FLNA;SPA17;SH2B3;SPECC1;CD52;NCOA4;HIST1H2AJ;EBF1;COMMD7;DHRS3;OSCAR;RILPL2;FES;APOC1;CASS4;TAGLN2;HIST1H2BH
BHLHE40 (E)	8/348	0.999918	0.999996	1.88e-06	0.334089	2.74e-05	IMPA2;STMN1;EIF5A2;FAM53B;PLIN2;IGF2BP3;HIF1A;FTL
BCLAF1 (E)	31/851	0.999924	0.999996	1.88e-06	0.532215	4.05e-05	HIST1H2BN;HIST1H2BO;CDCA3;HIST1H2BL;HIST2H2AB;SAT1;LYL1;TUBA1B;HIST1H3A;ZNF846;HIST1H3F;HIST1H2AE;HIST1H1D;HIST3H2BB;IGF2BP3;HIST1H3H;RILP;HIST1H1B;HIST1H2AM;HIST1H2AL;HIST1H2AI;HIST1H2AJ;HIST1H4A;TACC3;HIST1H2BH;TNIK;HIST1H2BG;HIST2H3D;CD68;FTL;PHF19
IRF3 (E)	21/663	0.99996	0.999996	1.88e-06	0.461445	1.86e-05	TOP2A;HIST1H2BN;BIVM;CDCA2;CDCA3;UBE2C;ROGDI;ZNF77;CENPA;TPX2;PNKD;HIST1H2AE;HIST1H2BF;MYH9;HIST1H2BG;HIST1H3B;HIST1H2BB;HIST1H3C;HIST1H3D;MEGF9;HIST1H2AB
E2F1 (C)	30/859	0.999968	0.999996	1.88e-06	0.508798	1.63e-05	COL18A1;RTN1;SDC4;KCNC3;HIST1H2BL;HIF1A;CSF2RA;AURKB;TUBA1B;HIST1H3F;HIST1H1D;LRIG1;TK1;JAM3;E2F8;NQO1;G6PD;ZFHX3;WSB2;UBE2C;HIST1H2AH;ARPC5;DEK;ABTB2;H1F0;TFDP1;SMS;BLVRB;MYH9;MAPRE2
UBTF (E)	68/1631	0.999984	0.999996	1.88e-06	0.604639	9.7e-06	PHLDB1;PLXND1;ARPC1B;PROS1;PDE3B;PTPRJ;IRS2;SAT1;ETS2;VSIG10;CAPZB;RASSF3;BCL7A;IMPA2;PSTPIP2;MYB;EFHD2;FAM53B;CPNE2;SLC12A7;BAHCC1;GLUL;CTSB;HIST1H2AB;APAF1;SYK;ACSL1;HIST1H2AH;ACTN1;TTC7B;RHOG;VAV2;CLIP2;RAB31;HIST1H2BF;PLEKHO1;HIST1H2BH;MAML3;SMIM3;CEBPD;NXN;STXBP1;SKA3;DTX4;HIST1H3A;PRKAR2B;HLX;EPB41L2;HIST1H3F;HIST1H3H;FAM43A;HIST1H3B;SH2B3;HIST1H3D;E2F8;STAT5A;VASP;STAT5B;ZFHX3;CMTM3;PBX3;M…
EGR1 (E)	14/537	0.999985	0.999996	1.88e-06	0.378047	5.57e-06	IL4R;RFX2;CPPED1;PTPRE;SDCBP;PNKD;TUBA1A;MYB;CDC42EP1;AUNIP;HCST;IER3;SLC29A2;APOBEC3B
ZBTB7A (E)	96/2184	0.999989	0.999996	1.88e-06	0.633796	6.73e-06	ACHE;PTPRS;SLC44A2;PROS1;PDE3B;ILK;STMN3;ARRB1;PTPRJ;LYST;CLU;ETS2;ASGR1;LIMD2;TUBA1B;CAPZB;RASSF3;FTH1;RPS6KA1;PIM1;MAP3K8;CPNE2;GLUL;SLC16A5;CTSB;TGM2;IER3;ADAMTS7;RHBDF1;CARD10;APAF1;WSB2;MMD;ACTN1;TESC;CTDSPL;RHOG;TMC8;AGTRAP;AFAP1;MYO7A;RHOF;GMIP;VAV2;FNDC4;CNKSR3;CDC42EP1;MAML3;OBSL1;KCTD15;VCL;BLVRA;DCP2;SLC29A2;FTL;CCDC40;RAI14;NOTCH3;CEBPA;SHC2;TTYH3;CDCA2;RGS19;CEBPD;UHRF1;PDGFB;NEXN;NC…
NFYB (E)	133/3715	0.999992	0.999996	1.88e-06	0.480561	3.83e-06	CD82;CCNF;ROGDI;IRS2;LIPA;SAT1;BEST1;FAM110A;CDC20;SESN3;FTH1;STMN1;PDK4;COTL1;HIST1H2AE;HIST3H2BB;HIST1H2AG;GLUL;HIST1H2AB;HIST1H2AM;BIVM;RNF43;HIST1H2AL;G6PD;HIST1H2AI;HIST1H2AH;ACTN1;C21ORF58;USP2;HIST1H2AJ;RFX2;PHOSPHO1;CRISPLD2;DPEP2;HIST1H2BF;HIST1H2BH;KIF20A;HIST1H2BG;HIST1H2BB;VCL;FTL;TTYH3;CDCA2;CDCA3;STXBP1;EIF5A2;HIF1A;EFNB1;HRH1;HIST1H3A;HIST1H3F;HIST1H3G;HIST1H3H;FAM43A;HIST1H3B;HIST…
TAF1 (E)	26/3346	0.999992	0.999996	1.88e-06	0.0944611	7.38e-07	HIST1H2BN;HIST1H2BO;HIST2H2AB;ILK;SKA3;SAT1;HIF1A;SDCBP;TUBA1B;ORC1;FTH1;STMN1;MAP3K8;HIST1H3B;HIST1H3D;HIST1H2AB;HIST1H2AM;C21ORF58;OSCAR;FSCN1;HIST1H2BF;MYH9;KIF20A;VCL;DCP2;FTL
E2F6 (E)	98/3245	0.999992	0.999996	1.88e-06	0.402578	3.13e-06	ANKLE1;PLXND1;FBXO27;DSCC1;CCNF;LDLRAD3;IRS2;ETS2;STMN1;MYB;ZNF846;PIM1;CDK20;STK32C;IGFBP4;ACTN1;ARRDC2;AKR1E2;CLEC11A;SMS;TAGLN2;PRKCQ;KCTD12;RAI14;CDCA3;ARX;EIF5A2;CDCA7;PLD1;SKA3;DTX4;STK4;HIF1A;NCAPH;RAP1A;LONRF3;RIMKLB;ACE;PBX3;RAB39A;C20ORF27;MICAL2;CYBRD1;ARPC5;GNB4;CDK1;RGL1;APOBEC3B;PHF19;PTPRS;LAMC3;KCNC3;PDE3B;LRRC6;MCM10;ARRB2;PYGL;TUBA1B;BCL7A;IMPA2;CTSH;TK1;LMCD1;SYK;CTDSPL;RHOG;RH…
BRCA1 (E)	43/3218	0.999992	0.999996	1.88e-06	0.167127	1.3e-06	HIST1H2BN;ACHE;CDCA2;CEBPE;ARPC1B;LOXL3;NRXN2;PPM1J;SKA3;DTX4;HIF1A;AURKB;FAM110A;CDC20;ABR;SDCBP;TUBA1B;GPR153;EPB41L2;FTH1;PIM1;MAP3K8;SPA17;WASF1;RILP;CDKN2D;STAT5B;G6PD;NCOA4;USP2;C20ORF27;ZNF77;PTK2;TPST2;CENPE;NEIL3;KIF18B;BCL6;FES;NINJ1;ZYX;TRIP13;MEGF9
SP1 (E)	20/707	0.999992	0.999996	1.88e-06	0.409342	3.17e-06	VASP;TOP2A;HIST1H2AM;HIST1H2BN;CDCA2;HIST1H2BO;CDCA3;HIST1H2BJ;HIST1H2AH;C21ORF58;RFX2;ZNF77;CENPA;PIM1;COTL1;MYH9;HIST1H2AG;HIST1H3B;DCP2;HIST1H2AB
PBX3 (E)	46/1269	0.999992	0.999996	1.88e-06	0.523757	3.97e-06	TOP2A;PLEKHH2;CDCA2;HIP1;CDCA3;HIST1H2BJ;ROGDI;HIST2H2AB;NRXN2;IRS2;DTX4;CENPA;HIF1A;TUBA1B;TMSB4X;CLTCL1;HIST1H1D;IGF2BP3;HIST1H2AG;TK1;HIST1H3I;HIST1H3B;ATP6V0E2;IER3;HIST1H2AB;UBE2C;HIST1H4L;ACTN1;RFX2;PBX3;RAB39A;MBOAT2;ZNF77;BAIAP2;CTTNBP2NL;TSPAN15;PNKD;DIAPH3;PCYOX1L;PADI2;MYH9;TAGLN2;MAML3;CD68;FTL;MEGF9
ATF2 (E)	64/2852	0.999992	0.999996	1.88e-06	0.295267	2.23e-06	HIST2H2AB;LOXL3;ILK;MCM10;BEST1;CDC20;TUBA1B;TUBA1A;LBH;TMSB4X;TRPS1;HIST1H2AE;HIST1H1D;DENND5A;HIST1H2AG;TK1;HIST1H1B;HIST1H2AB;HIST1H2AM;RNF43;HIST1H2AL;HIST1H2AI;HIST1H2AH;HIST1H2AJ;RHOF;FSCN1;HIST1H2BF;TAGLN2;HIST1H2BH;HIST1H2BG;FTL;HIST1H2BN;HIST1H2BM;HIST1H2BO;HIST1H3J;HIST1H2BJ;HIST1H2BI;HIST1H2BL;SKA3;DTX4;HIST1H3A;ORC1;HIST1H3F;HIST1H3G;IGF2BP3;HIST1H3H;APOE;HIST1H3I;HIST1H3B;HIST1H3D;VA…
YY1 (E)	18/2753	0.999992	0.999996	1.88e-06	0.0818899	6.15e-07	CDCA3;C21ORF58;MCM10;DEK;HIF1A;CPPED1;PNKD;HIST1H4A;HIST1H3A;ORC1;FTH1;CDK2AP1;KIF20A;TK1;SKAP2;TBC1D16;PHF19;CCDC40
ELF1 (E)	21/2483	0.999993	0.999996	1.88e-06	0.1082	7.95e-07	G6PD;ZNF570;HIST1H2BJ;ARPC1B;ARRDC2;EIF5A2;ZNF43;ILK;STK4;CTTNBP2NL;FKBP1A;GALE;PNKD;KIF18B;SYT11;ZNF846;FAM53B;HIST1H2AG;WASF1;IKBKE;E2F8
NFYA (E)	77/2250	0.999993	0.999996	1.88e-06	0.478429	3.44e-06	TOP2A;HIP1;CCNF;ROGDI;HIST2H2AB;MCM10;ARRB2;BEST1;CDC20;SESN3;COTL1;HIST1H2AE;HIST3H2BB;HIST1H2AG;TK1;GLUL;HIST1H1B;HIST1H2AB;HIST1H2AM;BIVM;HIST1H2AL;HIST1H2AI;HIST1H2AH;ACTN1;C21ORF58;HIST1H2AJ;RFX2;CTTNBP2NL;HIST1H2BF;MYH9;HIST1H2BH;KIF20A;HIST1H2BG;VCL;DCP2;FTL;HIST1H2BN;HIST1H2BM;PLEKHH2;CDCA2;RALB;HIST1H2BO;CDCA3;HIST1H2BJ;UHRF1;HIST1H2BL;EIF5A2;NRXN2;CENPA;HIF1A;AURKB;HIST1H3A;HIST1H3F;LRI…
CREB1 (E)	22/2238	0.999993	0.999996	1.88e-06	0.127944	9.19e-07	HIST1H2BN;BIVM;CDCA3;USP2;HIST2H2AB;LOXL3;ZNF77;MCM10;CENPA;SAT1;LYST;NCAPH;CENPE;TPX2;GALE;GPR153;DIAPH3;ORC1;BCL6;APOC1;HIST1H3B;HIST1H2AB
GABPA (E)	1982-11-01	0.999993	0.999996	1.88e-06	0.0684641	4.84e-07	TPX2;DIAPH3;CDCA3;CAPZB;ORC1;ZNF846;TACC3;TRIP13;WASF1;STK4;CPPED1
MAX (E)	24/2073	0.999993	0.999996	1.88e-06	0.152719	1.08e-06	PTPRS;NCKAP5L;ARRDC2;USP2;EIF5A2;PBX3;RHOG;MICAL2;ILK;ARRB2;SKA3;HIF1A;ETS2;AURKB;CDC20;TUBA1B;FABP5;SCD;STMN1;IGF2BP3;TAGLN2;KIF20A;TRIP13;MEGF9
NRF1 (E)	21/1882	0.999993	0.999996	1.88e-06	0.148441	1.03e-06	CDKN2D;CDCA2;CDCA3;RNF24;C21ORF58;ARPC5;ARRB2;SAMHD1;PTK2;ZWINT;OSCAR;FKBP1A;TPX2;SDCBP;TUBA1B;NEIL3;TFDP1;RASSF4;MYB;DENND5A;RGL1
PML (E)	40/1596	0.999993	0.999996	1.88e-06	0.34948	2.32e-06	HIST1H2BO;HIST1H3J;HIST1H2BJ;DSCC1;HIST1H2BL;HIST2H2AB;SKA3;SAT1;HIF1A;NCAPH;TUBA1B;HIST1H3A;TMSB4X;FTH1;HIST1H2AE;HIST1H1D;HIST3H2BB;HIST1H3H;HIST1H2AG;TK1;HIST1H3B;GLUL;HIST1H1B;IER3;HIST1H2AB;HIST1H2AM;NQO1;HIST1H2AL;HIST1H2AI;C21ORF58;ARPC5;RHOF;OSCAR;HIST1H4A;FSCN1;CDK1;HIST1H2BG;RGL1;CD68;FTL
MYC (E)	10/1515	0.999993	0.999996	1.88e-06	0.0884941	5.8e-07	HIST1H2BN;TUBA1B;SCD;ARRDC2;USP2;CDC42EP1;ILK;TAGLN2;TRIP13;SLC29A2
CREB1 (C)	22/1444	0.999994	0.999996	1.88e-06	0.208988	1.35e-06	UBE2C;EGF;CCNF;USP2;C20ORF27;CAPG;PARVA;GPR84;CTTNBP2NL;CENPE;HLA-DMA;TUBA1A;GNGT2;MAP1LC3A;DIAPH3;FTH1;NRIP1;PNPLA3;ULK2;MYH9;WASF1;BAHCC1
USF1 (E)	38/1423	0.999994	0.999996	1.88e-06	0.376121	2.43e-06	CEBPA;PTPRS;BRI3;EIF5A2;IRS2;NPL;STK4;HIF1A;TUBA1B;RASSF3;BCL7A;PRKAR2B;ENC1;STMN1;CDK20;HMOX1;LONRF3;ATP6V0E2;SLC12A7;CTSB;HIST1H2AH;USP2;C20ORF27;AGTRAP;RAB3IL1;ARPC5;MFHAS1;GALE;RAB31;BCL6;CLIP4;PLIN2;ST6GALNAC3;RGL1;MAPRE2;SKAP2;MEGF9;RAI14
CHD1 (E)	17/655	0.999994	0.999996	1.88e-06	0.374805	2.4e-06	HIST2H2AB;EBF1;PTPRJ;DHRS3;AURKB;CENPE;LBH;RASSF3;TMSB4X;HIST1H3F;MYH9;CDK2AP1;MAP3K8;IGF2BP3;FAM43A;HIST1H2BH;FTL
SIN3A (E)	37/1131	0.999994	0.999996	1.88e-06	0.471057	2.99e-06	HIST1H2BN;SMIM5;HIST1H2BO;HIST1H2BJ;DSCC1;HIST2H2AB;ILK;STMN3;MCM10;SKA3;HIF1A;NCAPH;AURKB;CDC20;TUBA1B;ORC1;IGF2BP3;HIST1H3H;HIST1H2AG;HIST1H3B;E2F8;IER3;HIST1H2AB;VASP;HIST1H2AM;HIST1H2AH;USP2;FKBP1A;CENPE;TPX2;GALE;KIF18B;TACC3;CDK1;KIF20A;TRIP13;CD68
RFX5 (E)	13/559	0.999994	0.999996	1.88e-06	0.33557	2.07e-06	CDKN2D;CDCA2;CD72;USP2;MCM10;COMMD7;AURKB;TUBA1A;GPR153;SESN3;SCD;APOC1;DCP2
SIX5 (E)	11/1094	0.999994	0.999996	1.88e-06	0.138702	8.38e-07	SPECC1;BIVM;TPX2;PNKD;ZNF570;CDCA3;BCL6;WASF1;SLC29A2;FTL;OSCAR
SP2 (E)	21/994	0.999994	0.999996	1.88e-06	0.298887	1.76e-06	TOP2A;PLEKHH2;CDCA2;HIP1;CDCA3;ACTN1;C21ORF58;ROGDI;RFX2;ILK;ZNF77;BAIAP2;CENPA;CTTNBP2NL;TSPAN15;TPX2;PNKD;DIAPH3;PCYOX1L;MYH9;MEGF9
USF2 (E)	19/965	0.999994	0.999996	1.88e-06	0.278129	1.63e-06	PTPRS;USP2;EIF5A2;TMC8;AGTRAP;RAB3IL1;ARPC5;STK4;HIF1A;RAB31;STMN1;CDK20;HMOX1;PLIN2;ST6GALNAC3;SLC12A7;SKAP2;CTSB;MEGF9
ZBTB33 (E)	15/702	0.999995	0.999996	1.88e-06	0.305813	1.64e-06	HIST1H2AM;HIST1H2BM;HIST1H2BO;HIST1H2AI;HIST1H2AH;NCOA4;HIST1H2AJ;HIST2H2AB;C20ORF27;SKA3;CDC20;HIST1H3H;SPA17;HIST1H3B;HIST1H2AB
FLI1 (E)	10/650	0.999995	0.999996	1.88e-06	0.218568	1.15e-06	LYL1;HHEX;GALE;ORC1;ITGA2B;RBPMS2;GP1BA;STK4;PF4;NRGN
MYC (C)	10/573	0.999995	0.999996	1.88e-06	0.249521	1.26e-06	HIST2H4A;TFDP1;RASSF3;RPS6KA1;CDCA7;ANGPTL4;KIF20A;RHOF;PLTP;FTL
NR2C2 (E)	2/350	0.999996	0.999996	1.88e-06	0.0811898	3.53e-07	TRIP13;CPPED1
YY1 (C)	3/332	0.999996	0.999996	1.88e-06	0.129051	5.58e-07	GRAMD1B;PTK2;DCN

## Sheet: MGUS_SMM_UP
Term	Overlap	P-value	Adjusted P-value	Minus_Log(adj. p value)	Odds Ratio	Combined Score	Genes
MAX (E)	59/2073	0.000324	0.0207679	1.68261	1.69824	13.6454	RPL4;GFM1;MTRR;SLC44A1;WDR3;ARPC5L;AUP1;EPRS;FBL;SEC61A1;TATDN1;ATIC;MAN1A2;PPAT;RUVBL1;RPLP2;TMEM109;SLC38A1;PARP1;SSR3;SIGMAR1;ALG3;WDR75;COMMD3;IMP4;AEN;LIG3;WIPI1;URB2;RAD23A;DNAJC1;PDE12;GARS;MRRF;CUTA;USO1;C6ORF52;MIEF1;TM9SF4;CLN6;MTDH;NOL6;ZNRF3;ZNF507;TMEM68;RRS1;SOCS4;NR2C2AP;SLC12A2;INSR;DDX31;NR1D2;POLR3B;IARS;ABCE1;EBAG9;SLC25A36;CD320;COX20
MYC (E)	46/1515	0.000407	0.0207679	1.68261	1.79467	14.0095	RPL4;CUTA;LNP1;GFM1;RPLP1;WDR3;USO1;ARPC5L;C6ORF52;MIEF1;AUP1;EPRS;TM9SF4;CLN6;NOL6;FBL;SERP1;ATIC;PPAT;TMEM68;RUVBL1;RRS1;RPLP2;SLC19A2;SLC38A1;PARP1;DDX31;ALG3;WDR75;IMP4;NR1D2;AEN;LIG3;URB2;RAD23A;SLC39A14;POLR3B;PDE12;GARS;IARS;ABCE1;MRRF;EBAG9;MBTPS2;CD320;COX20
NANOG (C)	22/595	0.0013619	0.0463045	1.33438	2.14648	14.1644	SHC4;CALCA;RBFOX2;SNRPN;C9ORF152;LRRN2;IDUA;RHBDD2;MTUS1;EIF2AK3;COMMD3;PAX6;BMI1;DKK1;SLC39A14;BMP4;TWSG1;LRRTM3;IL6ST;SLC25A36;MBTPS2;COX20
SALL4 (C)	15/355	0.00223461	0.0569825	1.24426	2.44637	14.9319	PRKCI;CALCA;SLC44A1;LRRN2;CDKN2A;UBE2E3;OTUD7B;SLC39A14;SMAD5;OXR1;FBL;SMOC1;IL6ST;SLC25A36;MBTPS2
AR (C)	33/1095	0.00307026	0.0626332	1.2032	1.74906	10.12	ZFYVE9;RPLP1;NGLY1;TMTC2;PRDM1;LAMC1;ARHGAP5;MLLT3;FBL;MAN1A2;ERBB4;RUVBL1;CHSY3;STXBP6;SAMD12;MPZL1;CYP2J2;POLR2M;MEF2C;C9ORF152;UBE2E3;SPINK5;GAB1;NEB;URB2;FOXP2;HIPK2;ANKFN1;NBEA;NRG3;PSAT1;ERGIC1;SLC25A36
SP1 (E)	23/707	0.00527595	0.0771731	1.11253	1.87444	9.83066	MTRR;RPN2;PET100;INSR;SSR3;SEL1L;EIF2AK3;CASC4;ZBTB20;AEN;LSR;WIPI1;SREBF2;NOL6;TMX2;RUVBL1;OSBP;BBX;PWWP2A;GLCCI1;IARS;ZNF687;R3HDM1
UBTF (E)	44/1631	0.00529619	0.0771731	1.11253	1.56878	8.22161	ZNF592;SLC44A1;EI24;PON2;NGLY1;ARPC5L;CASC4;OTUD7B;UAP1;BMI1;FAM214A;CAMSAP2;SERP1;MAN2A1;MAN1A2;HMCES;BBX;PWWP2A;EPC2;SEC63;SLC12A2;UBE2E3;ADAM10;ATP11B;EIF2AK4;NIPA2;LEMD3;SMAD5;ZDHHC14;INHBE;EID1;TWSG1;DNAJC1;RCN2;PDE12;LPCAT4;PSAT1;RASA2;GARS;IL6ST;SLC25A36;MBTPS2;PFN2;SLC27A4
FOS (E)	20/637	0.0128476	0.163807	0.785669	1.79747	7.82726	CUTA;RPN2;PET100;SSR3;SEL1L;EIF2AK3;ZBTB20;AEN;NOL6;PSAT1;RUVBL1;OSBP;DNAJB11;PWWP2A;GLCCI1;IARS;P4HB;ZNF687;IL6ST;MPZL1
MYC (C)	18/573	0.0176324	0.187306	0.727449	1.79384	7.24357	RPL4;CHID1;CCNT2;PARP1;RPLP1;WDR3;ARPC5L;GTPBP10;WDR75;AEN;MTDH;NOL6;RPLP2;TMEM209;IARS;ABCE1;SLC25A36;SLC19A2
NFE2L2 (C)	28/1022	0.0201544	0.187306	0.727449	1.56763	6.12054	CDKN1A;COLEC10;CCNT2;TMTC2;ZBTB20;SLC1A4;PTPRK;LAMC1;ARHGAP5;CDH9;MTDH;EDNRB;ZNRF3;MAN2A1;TMEM108;SEC63;RBFOX2;SSR3;RASSF8;NR1D2;RANBP6;LEMD3;OXR1;BMP6;HIPK2;BMP4;MDM2;COX20
POU5F1 (C)	10/261	0.021363	0.187306	0.727449	2.18796	8.41511	SNRPN;LRRTM3;LRRN2;COMMD3;PAX6;BMI1;IL6ST;DKK1;SLC39A14;SLC25A36
NFYB (E)	83/3715	0.0220359	0.187306	0.727449	1.30626	4.98349	MTRR;PIGT;RPLP1;WDR3;TECR;ZBTB20;MIA3;ARHGAP5;MAN1A2;PPAT;RUVBL1;OSBP;BBX;PWWP2A;RPLP2;EPC2;ZNF687;SCYL2;IDH3A;STRBP;SSR3;SIGMAR1;ALG3;ADAM10;TRPT1;IMP4;AEN;WIPI1;URB2;PEX1;LEMD3;PDIA6;SREBF2;MID2;EID1;DNAJC1;RCN2;TMX2;DMWD;DNAJB11;GLCCI1;CD46;IL6ST;ERGIC1;CUTA;LNP1;RETSAT;RPN2;C2ORF69;USO1;SEL1L;UAP1;SLC1A4;NOL6;GANAB;MAN2A1;CLPTM1;RDH14;MPZL1;SOCS4;SLC19A2;CLASP2;ANKRD34A;PET100;GALNT2;EIF2AK3;…
SOX2 (C)	22/775	0.0263127	0.206454	0.685177	1.61796	5.88565	SHC4;SNRPN;C9ORF152;LRRN2;IDUA;RHBDD2;CEP120;MTUS1;SLCO5A1;PAX6;DKK1;SLC39A14;ZDHHC14;BMP4;TWSG1;LRRTM3;PDE12;EPC2;IL6ST;SLC25A36;NR2C2AP;TMED4
E2F6 (E)	72/3245	0.0376247	0.263926	0.578517	1.28382	4.21106	SLC44A1;TMEM179B;NGLY1;ARPC5L;PLOD3;AUP1;FBL;SEC61A1;ATIC;PPP3CC;PPAT;HMCES;TMED3;TMEM109;ZNF687;SEC63;SLC38A1;GPR37;PARP1;UBE2E3;SIGMAR1;AEN;LIG3;URB2;RAD23A;NIPA2;PEX1;LEMD3;SLC39A14;PIAS1;EID1;TWSG1;PDE12;ANKS6;CD46;ERGIC3;MRRF;PFN2;LNP1;KANK1;SNAP47;PON2;CLN6;ZNRF3;ZNF507;TMEM68;SOCS4;SH2B2;SLC19A2;NR2C2AP;POLR2M;SLC12A2;RHBDD2;VDR;DDX31;RASSF8;BMP8B;NR1D2;BMP6;HIPK2;SPCS2;LPCAT4;PSAT1;MDM2;I…
SIN3A (E)	29/1131	0.0388127	0.263926	0.578517	1.46037	4.74475	RPL4;GFM1;TMEM179B;RPLP1;WDR3;GTPBP10;C6ORF52;FAM214A;CYB5D2;NOL6;SNAPC5;ATIC;PPAT;FAM174A;RRS1;SOCS4;SLC12A2;ALG3;WDR75;IMP4;AEN;LIG3;WIPI1;URB2;PDE12;MDM2;GARS;IARS;ABCE1
SUZ12 (E)	5/105	0.04254	0.264088	0.578251	2.72863	8.61514	CALCA;MAB21L1;BMI1;PDZRN4;FREM3
RUNX1 (C)	32/1294	0.0469282	0.264088	0.578251	1.40763	4.30615	PIGT;ZNF592;CCNT2;ZFYVE9;SLC41A3;ARPC5L;OTUD7B;LAMC1;EPRS;CXXC5;CAMSAP2;HERC5;NCLN;GNG7;NR2C2AP;PRKCI;ZHX2;SLC38A1;SNRPN;ITGA4;STRBP;ALG3;ATP11B;RANBP6;OXR1;SREBF2;RCN2;NBEA;CCPG1;DMWD;CDH12;IL6ST
ERG (C)	6/144	0.0477846	0.264088	0.578251	2.37474	7.22171	SNAPC5;RGP1;PIGT;ZNF592;NGLY1;GLCCI1
TAF1 (E)	73/3346	0.0498878	0.264088	0.578251	1.25854	3.77309	RPL4;PIGT;CCNT2;PIGO;SLC44A1;TMEM179B;RPLP1;ZSCAN9;ARPC5L;OTUD7B;MIA3;AUP1;EPRS;CYB5D2;MRPL32;FBL;SEC61A1;UFL1;TATDN1;SERP1;MAN1A2;PWWP2A;RPLP2;SEC63;TMED4;IDH3A;SLC38A1;SSR3;ALG3;WDR75;COMMD3;IMP4;RAD23A;LEMD3;PIAS1;PDE12;DNAJB11;COMMD3-BMI1;GARS;GLCCI1;CD46;IL6ST;DAP3;LNP1;SNAP47;RETSAT;TARSL2;USO1;C6ORF52;TM9SF4;MTDH;GANAB;TMEM68;CLPTM1;EMC4;TMEM209;SOCS4;SLC19A2;POLR2M;SLC12A2;YIPF2;EIF2AK3;D…
CREB1 (E)	51/2238	0.051782	0.264088	0.578251	1.30425	3.86152	MTRR;CCNT2;TMEM179B;EPRS;CLINT1;CYB5D2;SNAPC5;UFL1;SERP1;FAM174A;RUVBL1;OSBP;PWWP2A;RPLP2;ZNF687;SSR3;WDR75;ATP11B;WIPI1;RAD23A;NIPA2;PEX1;LEMD3;SREBF2;TMX2;DNAJB11;GARS;MRRF;C2ORF69;GTPBP10;UAP1;C6ORF52;TM9SF4;GANAB;EMC4;SOCS4;CLASP2;POLR2M;PET100;EIF2AK3;NR1D2;RANBP6;SPCS2;CCPG1;HYOU1;CLPTM1L;IARS;P4HB;R3HDM1;ABCE1;SLC25A36
RCOR1 (E)	19/702	0.0550513	0.267392	0.572851	1.53276	4.44423	PRKCI;SLC44A1;TMEM179B;INSR;EI24;ATP11B;SLC1A4;URB2;AUP1;ZDHHC14;RGP1;MAN2A1;MDM2;NF1;PWWP2A;IL6ST;ERGIC1;MBTPS2;CD320
USF1 (E)	34/1423	0.0612099	0.283792	0.547001	1.35768	3.79259	CUTA;IDUA;USO1;CEP120;C6ORF52;BMI1;FAM214A;TM9SF4;CLN6;MTDH;NOL6;HERC5;ATIC;ZNF507;OSBP;SLC38A1;STRBP;SSR3;DDX31;WDR75;COMMD3;ADAM10;IMP4;NR1D2;LIG3;WIPI1;URB2;RAD23A;SPCS2;PDE12;COMMD3-BMI1;CD46;MRRF;SLC25A36
SMAD4 (C)	16/584	0.0680097	0.301608	0.520557	1.548	4.16118	KANK1;ZHX2;ITGA4;PRICKLE2;WDR75;PAX6;FOXP2;TWSG1;ANKFN1;ZNRF3;NRG3;MAN2A1;KCNS3;HYDIN;PMEPA1;EPC2
MYOD1 (E)	6/166	0.0825265	0.350738	0.455017	2.0459	5.10378	SEC16B;USO1;TMEM109;ASB5;NOL4;SREBF2
EZH2 (E)	10/338	0.0897864	0.366328	0.43613	1.66767	4.01963	ERBB4;INSR;MAB21L1;TET1;SLCO5A1;SLAIN1;P4HB;PDZRN4;CA14;FREM3
E2F1 (C)	21/859	0.103257	0.405084	0.392454	1.37748	3.12761	POLR2M;CDKN1A;SNRPN;TARSL2;GPAA1;RPLP1;SEL1L;OTUD7B;AEN;EIF2AK4;PEX1;FBL;GANAB;ATIC;CCPG1;HMCES;RPLP2;GARS;P4HB;ZNF687;MBTPS2
ELF1 (E)	53/2483	0.117609	0.444301	0.352323	1.21063	2.59123	RPL4;GFM1;MTRR;PIGT;PIGO;GPAA1;TMEM179B;WDR3;ZSCAN9;CEP120;PLOD3;AUP1;CLINT1;CYB5D2;SNAPC5;UFL1;TATDN1;SERP1;RUVBL1;TMED3;RPLP2;ZNF687;IDH3A;SSR3;WDR75;ADAM10;TRPT1;IMP4;ZDHHC14;TMX2;PDE12;GARS;CD46;RETSAT;RPN2;SEL1L;GTPBP10;C6ORF52;TM9SF4;NOL6;NCLN;RRS1;CLPTM1;EMC4;TMEM209;SOCS4;NR2C2AP;POLR2M;PET100;YIPF2;RHBDD2;EIF2AK3;CLPTM1L
PPARD (C)	8/285	0.148672	0.5358	0.270997	1.57502	3.00202	ZNF827;POLR3B;SSR3;DNAJC10;MTUS1;NF1;EPRS;CYB5D2
IRF3 (E)	16/663	0.152335	0.5358	0.270997	1.35335	2.54657	RPN2;PET100;SEL1L;EIF2AK3;ZBTB20;AEN;TMX2;RUVBL1;OSBP;DNAJB11;PWWP2A;GLCCI1;IARS;P4HB;ZNF687;R3HDM1
STAT3 (E)	17/725	0.170217	0.566965	0.246444	1.31361	2.32599	RETSAT;RPN2;CEP120;ARPC5L;EIF2AK3;LSR;PRDM1;LAMC1;ARHGAP5;CYB5D2;TM9SF4;HERC5;CCPG1;ZNF687;IL6ST;MPZL1;SLC19A2
SUZ12 (C)	36/1684	0.172313	0.566965	0.246444	1.20172	2.11316	SHC4;PON2;NDNF;BMI1;MLLT3;NOL4;EDNRB;PPP3CC;LRRTM3;ADAMTS19;SLITRK5;CHSY3;STXBP6;ZHX2;EPHA6;GPR37;LRRN2;CDKN2A;GAB1;COMMD3;BMP8B;PAX6;DKK1;ANO5;ZDHHC14;FOXP2;BMP6;HIPK2;BMP4;EID1;RALYL;NRG3;IRF4;KCNS3;MAB21L1;LRRN1
CBX3 (E)	1981-03-01	0.182199	0.580761	0.236003	2.08964	3.55793	GFM1;SLC44A1;MAN2A1
GABPA (E)	43/2082	0.20474	0.632834	0.19871	1.15975	1.83938	RPL4;LNP1;SNAP47;GFM1;PIGT;PIGO;SLC44A1;TMEM179B;WDR3;ZSCAN9;ARPC5L;OTUD7B;PLOD3;MIEF1;AUP1;CLINT1;DHX30;TATDN1;SERP1;NCLN;TMEM68;RUVBL1;RRS1;RPLP2;EMC4;ZNF687;POLR2M;SURF1;PET100;YIPF2;SSR3;ALG3;TRPT1;RAD23A;PEX1;RGP1;POLR3B;PDE12;DMWD;CLPTM1L;P4HB;ERGIC3;MBTPS2
TP53 (C)	8/319	0.22483	0.65554	0.183401	1.40037	2.08993	CDKN1A;EI24;GNG7;MDM2;AEN;PRDM1;SLC39A7;NEO1
ZMIZ1 (E)	20/914	0.22494	0.65554	0.183401	1.22247	1.82383	RETSAT;IDUA;RPLP1;NGLY1;ADAM10;UAP1;MPP5;PDIA6;SMAD5;RGP1;SNAPC5;GANAB;RCN2;MAN2A1;MAN1A2;EMC4;P4HB;ERGIC1;DAP3;COX20
NFIC (E)	7/279	0.244927	0.676488	0.16974	1.3999	1.96937	HERC5;POLR2M;PRKCI;SLC44A1;TMEM68;MDM2;IDH3A
CREB1 (C)	30/1444	0.245393	0.676488	0.16974	1.16104	1.63114	CDKN1A;CCNT2;SEL1L;GTPBP10;MIEF1;EPRS;TM9SF4;SNAPC5;TATDN1;FAM174A;OSBP;RPLP2;RPRD1A;SCYL2;CHID1;ZHX2;RBFOX2;EIF2AK3;DDX31;RAD23A;NIPA2;RANBP6;LEMD3;OXR1;SREBF2;DNAJB11;NF1;HYOU1;P4HB;R3HDM1
TCF7L2 (E)	13/583	0.262872	0.694009	0.158635	1.24246	1.66004	ZSCAN9;PEX1;ARHGAP5;CXXC5;DKK1;ZNRF3;PPAT;TMEM68;SCYL2;SLC25A36;CD320;COX20;CLASP2
NFYA (E)	45/2250	0.265356	0.694009	0.158635	1.11873	1.48419	CUTA;LNP1;MTRR;RPN2;WDR3;TECR;SEL1L;ZBTB20;MIA3;NOL6;GANAB;RUVBL1;OSBP;BBX;PWWP2A;RPLP2;ZNF687;MPZL1;SLC19A2;ANKRD34A;PET100;SSR3;EIF2AK3;ADAM10;IMP4;AEN;WIPI1;PEX1;LEMD3;PDIA6;SREBF2;SPCS2;RCN2;TMX2;PSAT1;DNAJB11;HYOU1;GLCCI1;IARS;P4HB;CD46;IL6ST;R3HDM1;EBAG9;SLC25A36
FOXA1 (E)	5/205	0.315985	0.790034	0.102354	1.35733	1.56373	RBFOX2;MDM2;LSR;FOXP2;ELK3
RFX5 (E)	12/559	0.317563	0.790034	0.102354	1.19314	1.36863	DNAJC1;MAN2A1;RHBDD2;PSAT1;CEP120;RUVBL1;OSBP;DNAJB11;EIF2AK3;FAM214A;EBAG9;SLC25A36
ATF3 (E)	3/114	0.342222	0.800416	0.0966841	1.46592	1.57189	GTPBP10;RAD23A;RANBP6
SP2 (E)	20/994	0.349665	0.800416	0.0966841	1.11727	1.174	RPN2;PIGO;ZSCAN9;SEL1L;EIF2AK3;WDR75;ZBTB20;PDIA6;NOL6;INHBE;TMX2;RUVBL1;OSBP;BBX;PWWP2A;GLCCI1;ZNF687;IL6ST;R3HDM1;MPZL1
PBX3 (E)	25/1269	0.364616	0.800416	0.0966841	1.09359	1.10334	RPL4;GFM1;RPN2;TECR;ZBTB20;RUVBL1;OSBP;BBX;PWWP2A;ZNF687;MPZL1;PET100;INSR;EIF2AK3;RAD23A;PDIA6;TMX2;SMOC1;DMWD;MDM2;GLCCI1;P4HB;IL6ST;R3HDM1;CD320
TCF3 (C)	20/1006	0.369758	0.800416	0.0966841	1.10296	1.09734	PRKCI;RBFOX2;SNRPN;PARP1;C9ORF152;LRRN2;COMMD3;SLCO5A1;PAX6;BMI1;CXXC5;DKK1;SLC39A14;TWSG1;LRRTM3;ACKR4;EPC2;IL6ST;SLC25A36;MBTPS2
PML (E)	31/1596	0.373165	0.800416	0.0966841	1.07824	1.06286	SNAP47;SLC44A1;TARSL2;TMEM179B;RPLP1;CEP120;ARPC5L;C6ORF52;AUP1;CYB5D2;SNAPC5;FBL;UFL1;TATDN1;GANAB;SERP1;TMEM68;CLPTM1;ZNF687;SEC63;SLC12A2;DDX31;LSR;NIPA2;LEMD3;ATRN;POLR3B;GARS;GLCCI1;P4HB;COX20
BCLAF1 (E)	17/851	0.377447	0.800416	0.0966841	1.10773	1.07929	GFM1;SLC44A1;YIPF2;ZSCAN9;OTUD7B;COMMD3;RAD23A;C6ORF52;AUP1;SNAPC5;NCLN;POLR3B;TMEM68;RUVBL1;COMMD3-BMI1;EMC4;MBTPS2
PPARG (C)	11/535	0.379888	0.800416	0.0966841	1.13985	1.10324	CDKN1A;RETSAT;INSR;PON2;RASSF8;OTUD7B;GARS;SLC39A7;MRRF;MTDH;CAMSAP2
EGR1 (E)	11/537	0.384514	0.800416	0.0966841	1.1354	1.08518	LNP1;ATRN;SURF1;ABI2;SSR3;ARPC5L;OTUD7B;PLOD3;NR1D2;PDIA6;SOCS4
FLI1 (E)	13/650	0.400237	0.804958	0.0942267	1.10787	1.01448	CHID1;PET100;YIPF2;ATP8B2;RPLP1;WDR3;ARPC5L;C4ORF47;AEN;SEC61A1;TATDN1;DMWD;RRS1
VDR (C)	1976-02-01	0.402479	0.804958	0.0942267	1.46463	1.33297	VDR;SCYL2
NELFE (E)	5/234	0.420016	0.823878	0.084137	1.18367	1.02679	UFL1;RPLP1;UAP1;P4HB;SLC19A2
GATA2 (C)	15/772	0.430794	0.829075	0.0814062	1.07502	0.905305	SEC16B;MEF2C;CDKN1A;ZHX2;ATP8B2;GALNT2;ZBTB38;CXXC5;FBLN2;SREBF2;FBL;POLR3B;CCPG1;HYDIN;CA14
NRF1 (E)	35/1882	0.465892	0.858835	0.0660901	1.02779	0.785026	SNAP47;PIGT;CCNT2;RETSAT;C2ORF69;GPAA1;RPLP1;TECR;USO1;CEP120;NGLY1;GTPBP10;PLOD3;MRPL32;FBL;PPAT;TMED3;TMEM109;TMEM209;NR2C2AP;TMED4;YIPF2;ADAM10;LIG3;RAD23A;NIPA2;SMAD5;PIAS1;POLR3B;NF1;CLPTM1L;P4HB;ERGIC3;CD320;DAP3
TP63 (C)	26/1399	0.47956	0.858835	0.0660901	1.02629	0.754204	KANK1;CDKN1A;ZFYVE9;RPLP1;SEL1L;ARPC5L;PRICKLE2;OTUD7B;SLC1A4;ARHGAP5;ELK3;ZNF827;SLAMF7;BDKRB1;MPZL1;IDH3A;SEC16B;RBFOX2;EPHA6;VDR;HBE1;MTUS1;ATRN;MDM2;CLPTM1L;CD46
CEBPB (E)	3/144	0.486928	0.858835	0.0660901	1.15225	0.829201	GARS;IARS;SH2B2
USF2 (E)	18/965	0.487041	0.858835	0.0660901	1.0297	0.740777	CUTA;USO1;CEP120;COMMD3;ADAM10;IMP4;NR1D2;LIG3;WIPI1;FAM214A;MTDH;SNAPC5;SPCS2;ATIC;ZNF507;DNAJB11;MRRF;SLC25A36
BRCA1 (E)	59/3218	0.488357	0.858835	0.0660901	1.01236	0.725564	RPL4;PIGO;SLC44A1;TMEM179B;CASC4;ZBTB20;AUP1;CYB5D2;SEC61A1;TATDN1;SERP1;PPAT;HMCES;OSBP;RPLP2;EPC2;ZNF687;SEC63;PRKCI;SLC38A1;LSR;RAD23A;SREBF2;PDE12;DNAJB11;RASA2;GARS;MRRF;CUTA;SNAP47;RPN2;USO1;GTPBP10;FAM214A;TM9SF4;CAMSAP2;TMEM68;CLPTM1;TMEM209;RPRD1A;SOCS4;CLASP2;SLC12A2;RHBDD2;EIF2AK3;RANBP6;MPP5;ABI2;POLR3B;CCPG1;PSAT1;MDM2;CLPTM1L;IARS;P4HB;R3HDM1;ABCE1;SLC25A36;CD320
YY1 (E)	50/2753	0.521489	0.897927	0.046759	1.00078	0.651576	RPL4;PIGT;CCNT2;TMEM179B;ZSCAN9;PLOD3;MIA3;AUP1;BMI1;CYB5D2;MRPL32;UFL1;TATDN1;SERP1;PPP3CC;PWWP2A;EPC2;SSR3;ALG3;WDR75;IMP4;RAD23A;PEX1;LEMD3;SREBF2;PIAS1;TMX2;DMWD;DAP3;ZNF592;RPN2;MIEF1;TM9SF4;MTDH;GANAB;ZNF507;CLPTM1;ABL2;RPRD1A;POLR2M;SURF1;PET100;YIPF2;RHBDD2;RANBP6;SPCS2;NF1;R3HDM1;ABCE1;COX20
CHD1 (E)	12/655	0.528192	0.897927	0.046759	1.0099	0.644616	PRKCI;RPN2;RPLP1;SIGMAR1;ARPC5L;EIF2AK3;MDM2;OTUD7B;ADAM10;EPRS;DAP3;COX20
HNF4A (E)	23/1276	0.544915	0.911169	0.0404012	0.992517	0.602583	SEC16B;CCNT2;GALNT2;INSR;PON2;MTUS1;GAB1;PTPRK;MIEF1;AUP1;DKK1;SLC39A14;C12ORF10;INHBE;UFL1;ATRN;GANAB;LARP1;ZNF827;PPAT;RDH14;STXBP6;SLC19A2
YY1 (C)	6/332	0.56132	0.918101	0.0371094	0.995566	0.574903	RPL4;RBFOX2;ALG3;PLOD3;LAMC1;TM9SF4
CEBPD (E)	13/734	0.575762	0.918101	0.0371094	0.974472	0.537968	SLC38A1;RPLP1;GTPBP10;ALG3;RAD23A;AUP1;SREBF2;EID1;FBL;TMEM68;GARS;IARS;COX20
ZEB1 (E)	2/106	0.576064	0.918101	0.0371094	1.04054	0.573896	LSR;LEMD3
NR2C2 (E)	6/350	0.612805	0.944878	0.0246242	0.942593	0.461596	LNP1;GFM1;URB2;PEX1;EBAG9;HIPK2
STAT3 (C)	3/177	0.626128	0.944878	0.0246242	0.932136	0.436427	IL6ST;MLLT3;SEC63
ATF2 (E)	50/2852	0.628311	0.944878	0.0246242	0.959778	0.446028	RPL4;PIGO;SLC44A1;TMEM179B;RPLP1;ZSCAN9;CEP120;CASC4;EPRS;CYB5D2;SNAPC5;SERP1;FAM174A;RPLP2;ZNF687;SLC38A1;ALG3;WDR75;RAD23A;LEMD3;SREBF2;ATRN;PDE12;DNAJB11;GARS;MRRF;CUTA;LNP1;SNAP47;RETSAT;USO1;C6ORF52;TM9SF4;CLPTM1;TMEM209;SOCS4;POLR2M;YIPF2;EIF2AK3;NR1D2;RANBP6;POLR3B;MDM2;NF1;P4HB;R3HDM1;ABCE1;SLC25A36;CD320;COX20
FOXP2 (E)	3/178	0.629919	0.944878	0.0246242	0.926762	0.428316	EPC2;FOXP2;SREBF2
SMC3 (E)	20/1181	0.658541	0.953357	0.0207445	0.927922	0.387619	GFM1;IDUA;RHBDD2;UBE2E3;CEP120;TMTC2;PCDHB14;LSR;LAMC1;MTDH;HIPK2;INHBE;PDE12;LPCAT4;MAN2A1;SMOC1;RRS1;SCN2A;SLC27A4;CLASP2
TCF3 (E)	14/840	0.666273	0.953357	0.0207445	0.913554	0.370955	ZHX2;SLC44A1;EI24;USO1;NR1D2;SREBF2;ATRN;ZNF827;MAN1A2;EPC2;GARS;P4HB;IL6ST;DAP3
EGR1 (C)	5/315	0.679609	0.953357	0.0207445	0.870742	0.336313	LARP1;VARS;ERBB4;SLAMF7;ZBTB20
FOXA2 (E)	5/316	0.682287	0.953357	0.0207445	0.867898	0.331801	MDM2;OTUD7B;EPC2;LSR;FOXP2
ZC3H11A (E)	2/129	0.682304	0.953357	0.0207445	0.851092	0.325355	PDE12;GARS
IRF1 (E)	4/263	0.706	0.973136	0.0118266	0.833633	0.29022	LIG3;EIF2AK4;MRPL32;ZDHHC14
TRIM28 (C)	3/210	0.737145	0.999785	9.34948e-05	0.782206	0.23855	PARP1;SMOC1;PTPRG
ESR1 (C)	2/154	0.772063	0.999785	9.34948e-05	0.710198	0.18372	SMOC1;EBAG9
ETS1 (E)	2/156	0.778193	0.999785	9.34948e-05	0.700903	0.175773	OTUD7B;PEX1
SIX5 (E)	17/1094	0.779047	0.999785	9.34948e-05	0.846711	0.21141	PRKCI;RETSAT;SSR3;SEL1L;IMP4;AUP1;CLINT1;MRPL32;ZDHHC14;TM9SF4;DHX30;SERP1;NCLN;RPLP2;TMEM109;RDH14;R3HDM1
KLF4 (C)	15/987	0.795223	0.999785	9.34948e-05	0.827702	0.189653	CDKN1A;SLC44A1;PARP1;ARPC5L;PAX6;HIPK2;BMP4;POLR3B;PDE12;KCNS3;CLPTM1;TMEM209;ZNF687;IL6ST;COX20
STAT5A (E)	3/233	0.797904	0.999785	9.34948e-05	0.703152	0.158749	POLR3B;ARPC5L;SLC27A4
KAT2A (E)	1990-01-01	0.808375	0.999785	9.34948e-05	0.606742	0.129072	RPL4
SPI1 (E)	24/1540	0.81029	0.999785	9.34948e-05	0.846242	0.178018	RPL4;ANKRD34A;PON2;GTPBP10;COMMD3;TRPT1;NR1D2;URB2;PRDM1;CLINT1;FAM214A;NOL6;C12ORF10;UFL1;TATDN1;DMWD;DNAJB11;COMMD3-BMI1;SLAMF7;CD46;ABCE1;SOCS4;SEC63;COX20
HDAC2 (E)	2/175	0.829564	0.999785	9.34948e-05	0.623317	0.11647	EBAG9;MTDH
CTCF (E)	27/1790	0.868312	0.999785	9.34948e-05	0.814693	0.115038	GFM1;PIGO;IDUA;TMEM179B;CEP120;TMTC2;SLC1A4;PRDM1;LAMC1;MTDH;SNAPC5;MAN2A1;RRS1;SLITRK5;CA14;ZHX2;ATP8B2;UBE2E3;PEX1;DKK1;OXR1;HIPK2;INHBE;LPCAT4;CCPG1;MDM2;SLC27A4
BCL3 (E)	3/273	0.875567	0.999785	9.34948e-05	0.597747	0.0794305	SNAPC5;NR1D2;RAD23A
BHLHE40 (E)	4/348	0.879335	0.999785	9.34948e-05	0.624895	0.0803551	CUTA;ZNRF3;NR1D2;SLC25A36
ZBTB7A (E)	33/2184	0.889576	0.999785	9.34948e-05	0.812924	0.0951204	SNAP47;MTRR;ZFYVE9;IDUA;TMEM179B;PLOD3;SLC1A4;AUP1;BMI1;CXXC5;ELK3;MTDH;CAMSAP2;UFL1;PPAT;RAVER2;RDH14;CLASP2;PRKCI;UBE2E3;TET1;TRPT1;SMAD5;ZDHHC14;SREBF2;HIPK2;TWSG1;DNAJC1;CCPG1;RASA2;MDM2;SLC27A4;COX20
ZKSCAN1 (E)	1/120	0.889708	0.999785	9.34948e-05	0.453085	0.0529486	SLC25A36
IRF8 (C)	1/121	0.891722	0.999785	9.34948e-05	0.449286	0.0514888	USO1
ZBTB33 (E)	9/702	0.894189	0.999785	9.34948e-05	0.694989	0.0777261	RPL4;SLC12A2;SEC61A1;PDE12;CLPTM1;CASC4;TMEM209;R3HDM1;SEC63
SRF (E)	3/299	0.910657	0.999785	9.34948e-05	0.54451	0.0509604	UFL1;URB2;RANBP6
ZNF384 (E)	9/730	0.917056	0.999785	9.34948e-05	0.667011	0.0577545	ZNF592;UBE2E3;WDR75;IMP4;PRDM1;PDIA6;MRPL32;MBTPS2;ELK3
REST (E)	4/383	0.919602	0.999785	9.34948e-05	0.566158	0.0474521	FSTL5;EPC2;SCN2A;GABRG2
EZH2 (C)	2/237	0.931048	0.999785	9.34948e-05	0.457406	0.0326789	NDNF;ZDHHC14
RELA (E)	5/484	0.941138	0.999785	9.34948e-05	0.558601	0.0338879	COMMD3-BMI1;COMMD3;LSR;AUP1;IL6ST
SPI1 (C)	13/1056	0.949738	0.999785	9.34948e-05	0.662161	0.0341468	PIGT;CCNT2;GPAA1;WDR75;LAMC1;NOL6;PIAS1;C12ORF10;SNAPC5;POLR3B;FAM174A;GARS;EBAG9
FOSL2 (E)	1/196	0.972888	0.999785	9.34948e-05	0.275421	0.00757026	SHC4
RAD21 (E)	15/1265	0.973288	0.999785	9.34948e-05	0.634034	0.0171666	PIGO;IDUA;MYEOV;TMTC2;PCDHB14;PRDM1;PCDHB10;HIPK2;SNAPC5;POLR3B;LPCAT4;MAN2A1;RRS1;SCN2A;SLC27A4
TAF7 (E)	6/640	0.976757	0.999785	9.34948e-05	0.503751	0.0118466	RPL4;RPLP1;ALG3;AEN;RAD23A;GLCCI1
E2F4 (E)	6/710	0.989969	0.999785	9.34948e-05	0.451991	0.00455671	POLR2M;PPAT;CEP120;TMEM209;SOCS4;PIAS1
REST (C)	13/1280	0.993716	0.999785	9.34948e-05	0.538527	0.00339465	SEC16B;LRRN2;RPLP1;SEL1L;PLOD3;CXXC5;FSTL5;NCLN;NRG3;ANKS6;EPC2;NEO1;TMED4
GATA1 (C)	4/807	0.999785	0.999785	9.34948e-05	0.261332	5.63e-05	GALNT2;ZBTB38;GAB1;FBLN2

## Sheet: NDMM_LRMM_DOWN
Term	Overlap	P-value	Adjusted P-value	Minus_Log(adj. p value)	Odds Ratio	Combined Score	Genes
SUZ12 (C)	45/1684	0.000603	0.0560614	1.25134	1.77498	13.1595	SYNM;PCDHGB7;PCDHGB6;KLHL14;PCDHGB5;PWWP2B;ARX;GPR88;KCNA5;ADRA1D;AEBP1;ELFN2;MC4R;CACNA1I;SHH;ALCAM;RASD1;COBLL1;MARVELD3;HSF4;DRD2;WNT1;SLC13A5;EPHB1;CSGALNACT1;GHSR;JUN;ZHX2;KCND3;TMEM178A;PCDHGC4;SHISA2;OVOL1;DUSP26;ADRA2B;CYP26A1;PCDHGA11;PCDHGA12;NR4A3;NRG3;LYPD6B;KCNQ4;MKX;ZFPM1;DGKI
REST (E)	15/383	0.00155055	0.0616538	1.21004	2.54696	16.4767	RTN2;RIC3;GHSR;DIRAS1;SOGA3;NYAP2;OTOP3;MAPK8IP1;TMEM198;SMPD3;TBC1D30;SPIRE2;ZNF579;DRD2;PPFIA3
EGR1 (C)	13/315	0.00198883	0.0616538	1.21004	2.68161	16.6802	RTN2;EGR1;JUN;ACADVL;TNK2;ENTPD8;ZBTB20;ESR1;SHH;RAB26;MAP7;HSF4;EPHB1
SMAD4 (C)	17/584	0.0149069	0.346586	0.460189	1.86623	7.84924	BCAR3;STARD13;ZHX2;KSR1;ARID5B;ESRRG;NYAP2;ALCAM;DNMBP;NRG3;MAP7;SRGAP3;ZNF385D;DGKI;FAM71A;SOX5;BCAS1
TP63 (C)	33/1399	0.0193397	0.359718	0.444038	1.52005	5.99751	ITPRIP;CHRNA2;TSHZ2;HDLBP;NEDD9;SIPA1L3;NID2;PABPN1L;HERPUD1;NIPAL4;AKAP12;SHH;C17ORF107;ALCAM;SRGAP3;C17ORF100;C16ORF74;FAM71A;MUC6;EGR1;PCDHGC5;PLEKHG5;SYTL1;FAM189A2;TMEM175;NFATC4;FAM160A1;LYPD6B;DOK7;NCOA7;EPPK1;ZFPM1;DGKI
EZH2 (C)	8/237	0.0398213	0.61723	0.209553	2.14991	6.92992	CYP26A1;CACNA1I;ESRP1;OVOL1;WNT1;ELFN2;ZFPM1;ADRA2B
FOXA1 (E)	7/205	0.0499791	0.664008	0.177826	2.17229	6.50851	SMPD3;PAIP2B;PNPLA7;CITED2;ZBTB10;RAPGEF3;HERPUD1
ZEB1 (E)	4/106	0.0936627	0.999995	2.17148e-06	2.39877	5.68043	JMY;MARVELD3;MAP7;NFATC4
ESR1 (C)	5/154	0.105703	0.999995	2.17148e-06	2.05413	4.61589	STARD13;SLC24A3;GSE1;CGN;ESR1
REST (C)	26/1280	0.138671	0.999995	2.17148e-06	1.28173	2.53225	RTN2;BRSK2;CYP46A1;ELFN2;KIAA0513;GRIP1;OS9;GSE1;DRD2;TAS1R3;RIC3;GHSR;KCND3;SYT9;OTOP3;MAPK8IP1;TMEM198;NR4A1;RBMXL2;NRG3;LYPD6B;SPIRE2;FOSB;SIK1;ZNF579;ZFPM1
EZH2 (E)	8/338	0.184356	0.999995	2.17148e-06	1.48416	2.50955	RTN2;ITIH5;GIPR;FAM189A2;CGN;NEIL1;MEGF8;DUSP26
CTCF (E)	34/1790	0.186839	0.999995	2.17148e-06	1.19645	2.00705	LAMA5;SYNM;ACADVL;PCDHGB7;CITED2;NXN;NDUFA4L2;CYP46A1;ALCAM;RASD1;EME2;SIX5;COBLL1;MAP7;GSE1;WNT1;EPHB1;EGR1;JUN;ZHX2;SCARA5;ARHGEF16;MERTK;MAPK8IP3;ADRA2B;UNC13D;NFATC4;PCDHGA11;NR4A1;MC1R;DNMBP;NOXA1;MEGF8;RAPGEF3
CEBPB (E)	4/144	0.205714	0.999995	2.17148e-06	1.74429	2.75818	ZBTB10;ARID5B;NCOA7;HERPUD1
SMC3 (E)	23/1181	0.208113	0.999995	2.17148e-06	1.22193	1.91803	BCAR3;EGR1;JUN;PCDHGB7;TPM4;SCARA5;NXN;ARHGEF16;NDUFA4L2;ATN1;CYP46A1;ADRA2B;DNMBP;RASD1;EME2;SIX5;NOXA1;GSE1;SIK1;MEGF8;WNT1;EPHB1;RAPGEF3
NANOG (C)	12/595	0.259475	0.999995	2.17148e-06	1.2596	1.69932	AKAP12;CBX7;OS9;CITED2;TRIM2;SALL4;PCDHGC4;MAP7;SPIRE2;MZF1;C16ORF74;NID2
RUNX1 (C)	23/1294	0.35275	0.999995	2.17148e-06	1.1065	1.15297	TMEM184A;EGR1;ZHX2;ITPRIP;TPM4;CITED2;PWWP2B;TNK2;ZBTB10;NTN5;TNFRSF13C;AEBP1;LTC4S;NFATC4;LMF1;CACNA1I;KIAA1549;MC1R;DNMBP;GSE1;SIK1;NEIL1;ZFPM1
GATA2 (C)	14/772	0.371291	0.999995	2.17148e-06	1.12713	1.11672	CSGALNACT1;BCAR3;JUN;ZHX2;TPM4;KSR1;ABCB11;LMF1;KIAA0513;OBSCN;ITGA8;ZFPM1;SOX5;BCAS1
FOXA2 (E)	6/316	0.405253	0.999995	2.17148e-06	1.1787	1.06465	DNMBP;ABCC2;CITED2;ZBTB10;HERPUD1;HID1
TCF3 (C)	17/1006	0.464447	0.999995	2.17148e-06	1.04629	0.802412	BCAR3;CBX7;LAMA5;ARHGAP8;NXPH3;PCDHGC5;TNK2;PCDHGC4;ARID5B;AEBP1;UNC13D;SLC17A9;SALL4;ESRP1;SPIRE2;SRGAP3;MZF1
RAD21 (E)	21/1265	0.486348	0.999995	2.17148e-06	1.0269	0.740222	JUN;SYNM;PCDHGB7;SCARA5;CITED2;NXN;ARHGEF16;NDUFA4L2;ATN1;CYP46A1;ELFN2;NR4A1;RASD1;SIX5;GSE1;TLR10;MRGPRX4;MEGF8;WNT1;EPHB1;OR2A14
HNF4A (E)	21/1276	0.502707	0.999995	2.17148e-06	1.01729	0.699641	LAMA5;AMN;CHRNA2;ABCC2;SCARA5;CITED2;ARHGEF16;ENTPD8;LTBP3;CYP46A1;ZBTB4;FTCD;TMEM198;ZC3H12D;ACAP3;DOK7;CLDN19;ASPDH;SPIRE2;CDHR5;LZTS3
AR (C)	18/1095	0.509278	0.999995	2.17148e-06	1.01584	0.685448	CSGALNACT1;ITIH5;STARD13;SCARA5;KCND3;TSHZ2;FAM189A2;ZBTB10;FAM149A;NR3C2;AKAP12;ABCA10;NRG3;TRIM2;COBLL1;DRD2;EPHB1;DGKI
SUZ12 (E)	2/105	0.509406	0.999995	2.17148e-06	1.18031	0.796128	TBC1D30;WNT1
SALL4 (C)	6/355	0.515672	0.999995	2.17148e-06	1.04487	0.692003	BCAR3;STARD13;CITED2;SALL4;ARID5B;NID2
NELFE (E)	4/234	0.526897	0.999995	2.17148e-06	1.05685	0.677176	EGR1;CITED2;ZBTB4;HERPUD1
RELA (E)	8/484	0.52703	0.999995	2.17148e-06	1.02117	0.654056	ZC3H12D;JUN;KSR1;CITED2;NEDD9;ZBTB4;TNFRSF4;HERPUD1
ZKSCAN1 (E)	2/120	0.581552	0.999995	2.17148e-06	1.02948	0.558033	ACADVL;ZNF579
SRF (E)	4/299	0.716669	0.999995	2.17148e-06	0.821229	0.273586	EGR1;NR4A3;FOSB;MEGF8
MYOD1 (E)	2/166	0.753166	0.999995	2.17148e-06	0.738979	0.209478	TTC9;STARD13
GATA1 (C)	11/807	0.762022	0.999995	2.17148e-06	0.833561	0.226545	RAP1GAP2;BCAR3;TRIM63;KSR1;TNK2;TSHZ2;KCNQ4;GSE1;ABCB11;ZFPM1;UNC13D
KAT2A (E)	1990-01-01	0.770819	0.999995	2.17148e-06	0.681358	0.177359	EGR1
NFE2L2 (C)	14/1022	0.777276	0.999995	2.17148e-06	0.83638	0.210734	BCAR3;STARD13;ABCC2;CITED2;ACTL7B;ZBTB20;SHISA2;ESR1;LMF1;TTC9;TXLNB;LYPD6B;ITGA8;NCOA7
STAT3 (C)	2/177	0.783975	0.999995	2.17148e-06	0.692138	0.168452	CREB3L2;ARID5B
FOXP2 (E)	2/178	0.786601	0.999995	2.17148e-06	0.688171	0.165184	CITED2;ZBTB4
RFX5 (E)	7/559	0.804334	0.999995	2.17148e-06	0.76503	0.166578	TSPYL2;GMPPB;ARVCF;HSF4;FOSB;SIK1;CYP46A1
BHLHE40 (E)	4/348	0.818141	0.999995	2.17148e-06	0.702471	0.141	MC1R;CITED2;EME2;JMY
BCL3 (E)	3/273	0.821782	0.999995	2.17148e-06	0.67172	0.131845	ALCAM;SIX5;TAS1R3
NFIC (E)	3/279	0.832871	0.999995	2.17148e-06	0.656915	0.120134	EGR1;JUN;CITED2
TRIM28 (C)	2/210	0.857019	0.999995	2.17148e-06	0.581343	0.0896983	EGR1;JUN
SP1 (E)	8/707	0.890018	0.999995	2.17148e-06	0.687311	0.0800814	ARVCF;PAIP2B;OS9;CITED2;CREB3L2;ZBTB20;NFATC4;NR3C2
ERG (C)	1/144	0.905618	0.999995	2.17148e-06	0.422893	0.0419246	ACAP3
TCF7L2 (E)	6/583	0.913745	0.999995	2.17148e-06	0.624538	0.056336	SMPD3;RP1L1;MC1R;OS9;JMY;NFATC4
ZBTB7A (E)	28/2184	0.9253	0.999995	2.17148e-06	0.768691	0.0596791	LAMA5;PWWP2B;TNFRSF13C;KIAA0513;ZNF629;EME2;SIX5;RAB26;GSE1;RAB11FIP3;EGR1;PNPLA7;ARHGEF16;ENTPD8;DUSP8;MERTK;UNC13D;NFATC4;TMEM198;POU6F1;NR4A1;MC1R;DNMBP;NOXA1;SIK1;ZNF579;NEIL1;ZFPM1
IRF1 (E)	2/263	0.928616	0.999995	2.17148e-06	0.462031	0.034218	JUN;ANKRD53
KLF4 (C)	11/987	0.928945	0.999995	2.17148e-06	0.673349	0.0496299	AKAP12;CBX7;TPM4;CITED2;PWWP2B;HDLBP;GSE1;WNT1;NID2;UNC13D;NFATC4
ZMIZ1 (E)	10/914	0.929905	0.999995	2.17148e-06	0.661321	0.0480602	EGR1;SLC25A29;RASD1;PNPLA7;CITED2;NDUFA4L2;ATN1;RAB11FIP3;UNC13D;HERPUD1
SOX2 (C)	8/775	0.93731	0.999995	2.17148e-06	0.624131	0.040407	CBX7;CITED2;SALL4;ARID5B;SRGAP3;MSLN;NID2;BCAS1
RCOR1 (E)	7/702	0.94018	0.999995	2.17148e-06	0.603077	0.0372005	TPM4;CITED2;SIX5;SPIRE2;GSE1;MAPK8IP3;TMEM198
TAF7 (E)	6/640	0.949636	0.999995	2.17148e-06	0.566692	0.0292849	EGR1;JUN;CITED2;HDLBP;ZBTB10;ZBTB4
FOSL2 (E)	1/196	0.959925	0.999995	2.17148e-06	0.309296	0.0126504	TMEM184A
TP53 (C)	2/319	0.96681	0.999995	2.17148e-06	0.379313	0.012803	GSE1;ADRA1D
PBX3 (E)	13/1269	0.974439	0.999995	2.17148e-06	0.613032	0.0158734	STARD5;ZBTB20;MAPK8IP3;ZBTB4;NR3C2;KIAA0513;ARVCF;PAIP2B;OS9;SIX5;CREB3L2;MZF1;PPFIA3
STAT5A (E)	1/233	0.978243	0.999995	2.17148e-06	0.259475	0.00570758	EGR1
CREB1 (C)	15/1444	0.978573	0.999995	2.17148e-06	0.619858	0.013426	SRRM2;EGR1;ZHX2;SPAG4;SUPT5H;ELFN2;MAPK8IP1;TMEM198;GMPPB;NR4A1;NR4A3;CREB3L2;FOSB;SIK1;RAB11FIP3
IRF3 (E)	5/663	0.983964	0.999995	2.17148e-06	0.453021	0.0073236	ACAP3;ARVCF;CREB3L2;ZBTB20;NR3C2
TCF3 (E)	7/840	0.98428	0.999995	2.17148e-06	0.49951	0.00791454	EGR1;TTC9;ZHX2;ALCAM;SIK1;NEIL1;SUPT5H
POU5F1 (C)	1/261	0.986307	0.999995	2.17148e-06	0.231198	0.00318775	AKAP12
E2F1 (C)	7/859	0.987081	0.999995	2.17148e-06	0.487878	0.00634419	TSPYL2;STARD5;RASD1;SLC22A17;CLASRP;SOX5;HERPUD1
USF2 (E)	8/965	0.989516	0.999995	2.17148e-06	0.495192	0.00521885	KIAA0513;PNPLA7;TNK2;HDLBP;OTUD1;RAPGEF3;HERPUD1;NR3C2
PPARD (C)	1/285	0.990797	0.999995	2.17148e-06	0.211398	0.00195457	ABCB11
SP2 (E)	8/994	0.99221	0.999995	2.17148e-06	0.479883	0.00375288	ARVCF;PAIP2B;ZNF629;CREB3L2;ZBTB20;MEGF8;MZF1;NR3C2
PPARG (C)	3/535	0.992762	0.999995	2.17148e-06	0.336308	0.00244305	JUN;CITED2;LTC4S
CEBPD (E)	5/734	0.992938	0.999995	2.17148e-06	0.407373	0.00288701	ACAP3;JUN;HDLBP;NCOA7;ZBTB4
CHD1 (E)	4/655	0.994294	0.999995	2.17148e-06	0.365303	0.00209055	SRRM2;JUN;ZBTB10;PPFIA3
UBTF (E)	15/1631	0.995555	0.999995	2.17148e-06	0.542512	0.00241699	EGR1;KSR1;NXN;TNK2;FGFRL1;TMEM198;SMPD3;KIAA1549;DNMBP;ZNF629;EME2;SIX5;SPIRE2;NCOA7;OTUD1
STAT3 (E)	4/725	0.997671	0.999995	2.17148e-06	0.328623	0.000766	EGR1;JUN;CREB3L2;JMY
SPI1 (E)	13/1540	0.997725	0.999995	2.17148e-06	0.496817	0.00113149	SYTL1;AKAP17A;LTC4S;SIPA1L3;HERPUD1;ZC3H12D;GMPPB;OS9;SLC17A9;TRIM2;STAP1;CLASRP;WNT1
FOS (E)	3/637	0.998199	0.999995	2.17148e-06	0.280698	0.000506	OS9;CREB3L2;ZBTB20
BCLAF1 (E)	5/851	0.998299	0.999995	2.17148e-06	0.348867	0.000594	EGR1;JUN;CITED2;EME2;ZNF579
FLI1 (E)	3/650	0.998497	0.999995	2.17148e-06	0.27487	0.000413	TPM4;CLASRP;UNC13D
EGR1 (E)	2/537	0.998609	0.999995	2.17148e-06	0.222221	0.000309	ACADVL;PPFIA3
USF1 (E)	11/1423	0.998658	0.999995	2.17148e-06	0.454579	0.00061	KIAA0513;PNPLA7;FAM13A;JMY;HDLBP;CGN;OTUD1;RAPGEF3;OR2A14;HERPUD1;NR3C2
MYC (C)	2/573	0.999191	0.999995	2.17148e-06	0.207819	0.000168	AKAP12;CBX7
CREB1 (E)	20/2238	0.999316	0.999995	2.17148e-06	0.517833	0.000354	SRRM2;TSPYL2;EGR1;SPAG4;TEX14;AKAP17A;DUSP8;CYP46A1;MAPK8IP3;ZBTB4;TMEM175;TMEM198;GMPPB;NR4A3;OS9;CREB3L2;JMY;FOSB;SIK1;MZF1
SIN3A (E)	7/1131	0.999394	0.999995	2.17148e-06	0.364471	0.000221	CITED2;SIX5;ZBTB10;FOSB;SUPT5H;TMEM175;HERPUD1
ZNF384 (E)	3/730	0.999514	0.999995	2.17148e-06	0.243595	0.000118	SRRM2;RASD1;TEX14
ATF2 (E)	25/2852	0.999904	0.999995	2.17148e-06	0.49833	4.79e-05	CITED2;HDLBP;ZBTB4;HERPUD1;C17ORF107;EME2;SIX5;PIP5KL1;CREB3L2;TBC1D30;GSE1;PPFIA3;SRRM2;EGR1;JUN;SPAG4;ZBTB10;DUSP8;SUPT5H;MAPK8IP3;TMEM198;NR4A3;FOSB;NCOA7;MZF1
SIX5 (E)	5/1094	0.999926	0.999995	2.17148e-06	0.267523	1.98e-05	SRRM2;SMPD3;ACADVL;MZF1;SIPA1L3
E2F6 (E)	29/3245	0.999951	0.999995	2.17148e-06	0.503141	2.48e-05	SYNM;BRSK2;CITED2;ARX;FGFRL1;HERPUD1;PAIP2B;SLC25A29;EME2;SIX5;MAP7;CCDC180;C17ORF100;RAB11FIP3;PPFIA3;SRRM2;CBX7;ARHGEF16;SPAG4;ZBTB10;TEX14;SUPT5H;TMEM175;ACAP3;MC1R;JMY;ZFPM1;OTUD1;RAPGEF3
NFYA (E)	15/2250	0.999988	0.999995	2.17148e-06	0.378815	4.61e-06	TSPYL2;JUN;STARD5;ZBTB20;HERPUD1;NR3C2;GMPPB;ARVCF;PAIP2B;OS9;SIX5;PIP5KL1;CREB3L2;FOSB;PPFIA3
ZBTB33 (E)	1/702	0.999988	0.999995	2.17148e-06	0.0838033	1e-06	SUPT5H
E2F4 (E)	1/710	0.999989	0.999995	2.17148e-06	0.0828228	9.04e-07	TEX14
SPI1 (C)	3/1056	0.999992	0.999995	2.17148e-06	0.165287	1.28e-06	CITED2;STAP1;CLASRP
MAX (E)	1973-12-01	0.999993	0.999995	2.17148e-06	0.328724	2.29e-06	SRRM2;ACAP3;MC1R;PNPLA7;CITED2;JMY;SPAG4;ZBTB10;CCDC180;OTUD1;RAPGEF3;HERPUD1
NFYB (E)	30/3715	0.999994	0.999995	2.17148e-06	0.442805	2.86e-06	SYNM;BRSK2;HDLBP;ZBTB20;ZBTB4;NID2;HERPUD1;NR3C2;GMPPB;ARVCF;PAIP2B;SLC25A29;OS9;SIX5;PIP5KL1;CREB3L2;GSE1;PPFIA3;TSPYL2;JUN;STARD5;PNPLA7;SPAG4;ZBTB10;DUSP8;NFATC4;TMEM198;NR4A3;FOSB;ZFPM1
PML (E)	7/1596	0.999994	0.999995	2.17148e-06	0.251351	1.49e-06	JUN;ACADVL;CITED2;SIX5;GSE1;MAPK8IP3;ZBTB4
TAF1 (E)	1946-11-01	0.999995	0.999995	2.17148e-06	0.172199	9.43e-07	SRRM2;TSPYL2;JUN;CITED2;EME2;HDLBP;CLASRP;SUPT5H;ZBTB4;SIPA1L3;HERPUD1
BRCA1 (E)	19/3218	0.999995	0.999995	2.17148e-06	0.320862	1.74e-06	SRRM2;EGR1;JUN;CITED2;SPAG4;HDLBP;ZBTB20;TEX14;CYP46A1;SUPT5H;MAPK8IP3;ZBTB4;SIPA1L3;ALCAM;NR4A3;SIX5;CREB3L2;FOSB;PPFIA3
MYC (E)	6/1515	0.999995	0.999995	2.17148e-06	0.227153	1.22e-06	SRRM2;ACAP3;CITED2;EME2;NCOA7;HERPUD1
NRF1 (E)	9/1882	0.999995	0.999995	2.17148e-06	0.271573	1.42e-06	ACAP3;OS9;SIX5;HDLBP;FOSB;AKAP17A;MEGF8;ZBTB4;TMEM175
YY1 (E)	1953-07-01	0.999995	0.999995	2.17148e-06	0.136143	7.12e-07	SRRM2;OS9;EME2;HDLBP;SUPT5H;ZBTB4;HERPUD1
ELF1 (E)	1983-10-01	0.999995	0.999995	2.17148e-06	0.221539	1.13e-06	GOLGA3;OS9;ZNF629;EME2;NOXA1;ZNF579;AKAP17A;SUPT5H;SIPA1L3;TMEM175
GABPA (E)	1982-10-01	0.999995	0.999995	2.17148e-06	0.270578	1.35e-06	GOLGA3;EME2;NOXA1;ZNF579;AKAP17A;CLASRP;C17ORF100;MZF1;MAPK8IP3;TMEM198

## Sheet: NDMM_LRMM_UP
Term	Overlap	P-value	Adjusted P-value	Minus_Log(adj. p value)	Odds Ratio	Combined Score	Genes
TAF1 (E)	2163/3346	7.86474e-254	8.17933e-252	251.087	3.73125	2174.55	ATF1;JRK;NUP107;SLC4A1AP;TFRC;POP4;NDST2;CAPNS1;KIAA1586;C19ORF53;ALKBH1;GPBP1;PRKAB2;TSTD2;FRS2;CD2AP;SCO1;MTHFD2;EWSR1;UNC50;TMEM126A;RABL3;JTB;SF1;RABL6;SAR1A;SAR1B;AASDH;C12ORF60;ZNF26;PRPSAP1;PIP5K1A;ATRIP;ATG5;TOE1;PRPF38A;MTERF3;TIPARP;NCAPH2;EIF2AK1;LNPEP;LARP4;RPL17-C18ORF32;BTBD10;AGO3;QARS;FASN;SFXN2;HNRNPA1L2;DZIP3;C19ORF48;PRKAG1;ARHGAP1;SNX13;OSBPL11;ZNF48;MED18;MED17;JAK2;ENOPH1;RM…
MAX (E)	1392/2073	3.8412e-175	1.99743e-173	172.7	3.82082	1534.47	ATF1;POP7;GMFB;TFRC;POP1;TMEM97;PTPDC1;ALKBH2;PSMD9;IL4I1;TBK1;PSMD7;PSMD5;GPBP1;XYLB;ATG3;WDHD1;TSTD2;STARD7;PRKAB1;SCAMP3;EML4;DDX39A;MTHFD1;DDX39B;PRKAR1B;MTHFD2;ZC3H11A;CLNS1A;PSME3;ORAI1;CDIP1;ATF6;SLBP;ABCB6;CDCA4;AASDH;MRPL16;CDCA8;MRPL17;COPS7A;MRPL15;C12ORF66;HSPH1;ATG5;B3GALNT2;ABCA1;ZNF263;MTERF3;MTERF2;TIPARP;PMM2;PBX3;MRPL27;LNPEP;MAGOHB;CS;MRPL30;UCK2;FASN;SASS6;SFXN4;PSMG4;PSMG1;SF…
YY1 (E)	1725/2753	1.0717e-172	3.71522e-171	170.43	3.21475	1272.96	ATF1;POP5;SLC4A1AP;NOC2L;ALKBH8;ALKBH1;GPBP1;PRKAB2;EWSR1;ZC3H11A;TMEM126A;RABL3;JTB;TCEANC2;TMEM126B;SKAP2;RABL6;SF1;CDCA3;SAR1B;C12ORF60;ZNF25;PRPSAP1;C12ORF57;RDH11;AFMID;PIP5K1A;TOE1;PRPF38A;NCAPH2;LNPEP;MAGOHB;TBL3;QARS;C19ORF47;SFXN1;C19ORF48;ARHGAP1;MED19;SNX13;OSBPL11;MED18;C12ORF43;MECP2;MED13;SMPD4;ZNF41;TCP11L1;ENOPH1;LIN52;ZNF484;RMI2;DUSP3;RING1;RMI1;KIAA1143;C6ORF62;BAZ1B;MED27;TOMM…
BRCA1 (E)	1923/3218	1.40777e-161	3.66021e-160	159.436	2.87404	1064.47	ATF2;JRK;POP7;SLC4A1AP;TFRC;POP1;POP4;PTPDC1;FAM110A;NDST2;ALKBH2;SYNGAP1;CAPNS1;GPBP1;PRKACA;PKNOX1;GTSE1;TSTD2;ZNF12;PRKAB1;FRS3;RC3H2;CD2AP;MTHFD1;MTHFD2;EWSR1;RABL3;ATF7;SF1;SLBP;CDCA2;SAR1A;SAR1B;AASDH;CDCA5;NPRL3;ZNF24;C12ORF66;CIAO1;C12ORF57;ATG7;ATG5;TOE1;JUP;MTERF3;TIPARP;NCAPH2;LARP7;EIF2AK2;LNPEP;LARP4;RPL17-C18ORF32;MAGOHB;BTBD10;VANGL1;MOV10;FAM111A;TBL3;AGO3;QARS;C6ORF89;SFXN2;PKIG;…
ELF1 (E)	1569/2483	4.18949e-160	8.71415e-159	158.06	3.23646	1187.72	GMFB;POP4;ALKBH8;TBK1;C19ORF53;ALKBH1;GTSE1;WDR83OS;ATG3;GSTK1;TSTD2;PRKAB1;SCO1;UNC50;RABL3;JTB;TCEANC2;ATF6;SF1;SLBP;CDCA5;ZNF24;ZNF26;C12ORF66;CIAO1;ATG7;ATG5;LARP7;RPL17-C18ORF32;MAGOHB;FAM111A;TBL3;LAS1L;C6ORF89;STRN;HNRNPA1L2;ZNF490;MTMR14;PRKAG1;ARHGAP1;MED19;ZNF45;MED18;DDA1;MED11;MED10;TCP11L2;ZNF485;GSTO1;BAZ1A;MED28;SDHAF2;INCENP;PTRH2;PTRH1;PAFAH1B2;TRUB1;ZNF473;SZRD1;NIP7;URM1;TSR3;N…
GABPA (E)	1360/2082	1.44791e-154	2.50971e-153	152.6	3.49076	1236.53	C5ORF22;JRK;SLC4A1AP;NUP107;OSGEPL1;POP4;NOC2L;ALKBH3;PSMD9;RABGEF1;PSMD7;C19ORF53;ALKBH1;SUPT20H;WDR83OS;GABARAPL2;ZNF284;TYW5;CSNK2A1;TSTD2;NGDN;DNTTIP2;FRS2;HDHD2;PRKAB1;ZNF16;SCO1;DDX39B;PRKAR1B;CLNS1A;PSME3;UNC50;TCEANC2;TBPL1;CGGBP1;PARPBP;CDCA3;SAR1A;SAR1B;CDCA5;TPRG1L;C12ORF60;MRPL16;MTMR9;COPS7B;COPS7A;ZNF24;MRPL12;AAAS;MRPL13;IQGAP3;ZNF26;CIAO1;MRPL20;RNF214;GUCD1;GRPEL2;ATG5;EDEM3;ZNF2…
ATF2 (E)	1688/2852	4.87054e-133	7.23623e-132	131.14	2.72784	831.066	ATF2;POP7;SLC4A1AP;NUP107;TFRC;POP4;F11R;ALKBH2;SYNGAP1;GPBP1;WDR83OS;TSTD2;RC3H2;CD2AP;MTHFD2;ZC3H11A;TMEM126A;ATF7;SF1;SLBP;NLRX1;SET;SAR1B;AASDH;ZNF24;ZNF25;C12ORF66;PRPSAP1;C12ORF57;AFMID;LTA4H;ATG5;TOE1;PRPF38A;NCAPH2;LARP7;RPL17-C18ORF32;MAGOHB;BTBD10;FAM111B;MOV10;TBL3;C6ORF89;HNRNPA1L2;DZIP3;C19ORF48;LIN54;PRKAG1;ARHGAP1;OSBPL11;ZNF48;MED18;MED17;PANX1;MED13;CHAF1A;ENOPH1;RMI1;KIAA1143;SL…
NFYB (E)	2079/3715	2.60261e-131	3.38339e-130	129.471	2.45062	736.856	ATF2;POP5;POP1;F11R;ALKBH6;PTPDC1;ALKBH3;FAM110A;SYNGAP1;KIAA1586;HIST3H2BB;PRKACA;PKNOX1;GTSE1;TSTD2;RC3H2;MTHFD1;MTHFD2;TMEM126A;RABL3;TCEANC2;FAR1;ATF7;TMEM126B;CLOCK;SF1;SLBP;SET;CDCA2;CDCA3;AASDH;CDCA4;SHMT1;TPRG1L;C12ORF60;CDCA8;C12ORF57;RNF214;RHOT1;RDH11;AFMID;PIP5K1A;RDH14;ATRIP;TOE1;JUP;MTERF2;FUCA1;PBX3;LARP7;PBX1;FAM111B;FAM111A;LAS1L;QARS;FASN;SFXN2;MTMR12;MTMR11;ZNF490;MTMR14;NCAPG2…
E2F4 (E)	581/710	2.49593e-130	2.88419e-129	128.54	7.80378	2328.82	VPS29;IPO11;GABPB2;POP7;NUP107;SMC5;SMC6;SMC4;SMC2;FAM110A;FAM122B;RTTN;VPS35;GTSE1;WDHD1;DNAAF2;PIH1D1;REV1;ZFYVE21;CD3EAP;IFT80;WDR76;DEPDC1B;DDX39B;MTHFD1;YME1L1;NHLRC2;PRR11;RHNO1;ASF1B;SLBP;CDCA2;ANAPC15;PARPBP;CDCA3;CDCA4;PRKDC;CDCA5;MRPL18;SHMT1;CDCA7;NCAPG;NOLC1;CDCA8;WDR62;VPS26B;IQGAP3;NCAPH;SKA1;ANAPC11;SKA2;NUP85;FIGNL1;RAD21;AFMID;PLK4;TOE1;BARD1;ZNF143;PRPF38A;TEX30;SIVA1;NCAPH2;PLK…
MYC (E)	1001/1515	1.64023e-115	1.70584e-114	113.768	3.47488	918.42	ATF1;POP7;PGAP2;TFRC;POP1;TMEM97;PSMD9;IL4I1;ALKBH2;XYLB;TSTD2;DNTTIP2;DDX39A;DDX39B;MTHFD1;PRKAR1B;MTHFD2;CLNS1A;PSME3;SLBP;AASDH;MRPL18;CDCA8;MRPL17;COPS7A;MRPL15;MRPL12;C12ORF66;MRPL20;GRPEL2;ATRIP;ATG5;B3GALNT2;TOE1;ZNF263;MTERF3;TIPARP;PMM2;ERLIN1;MRPL27;MRPL24;MRPL21;CS;UCK2;TBL3;FASN;NAPEPLD;SFXN4;PSMG4;PSMG1;C19ORF48;RPLP1;RPLP0;ARHGAP1;PIGW;MRPL42;MED11;TUBA1C;TUBA1B;ATIC;MRPL40;TMEM43;F…
CREB1 (E)	1344/2238	2.00539e-109	1.89601e-108	107.722	2.73785	685.244	TFRC;PGAP2;POP4;GHITM;ZFYVE1;LSM10;PSMD8;ALKBH2;RABGEF1;PSMD7;C19ORF53;PSMD5;GPBP1;PSMD3;PKNOX1;ATG3;WDHD1;C5ORF15;TSTD2;NGDN;DNTTIP1;DNTTIP2;MYL6;PSME3;UNC50;RFX5;TMEM126A;RABL3;ATF6;SF1;ZNF277;CDCA3;SAR1A;AASDH;CDCA5;MRPL18;C12ORF60;MYNN;CDCA8;COPS7A;MRPL12;ZNF25;MRPL13;ZNF26;C12ORF66;NCAPH;CIAO1;DYNC2LI1;HSPH1;ATG7;ATRIP;ATG5;B3GALNT2;MCTS1;EDEM3;ZNF263;PRPF38A;ZNF260;NCAPH2;EXOC6B;LARP7;BBIP1…
SIN3A (E)	780/1131	3.01061e-103	2.60919e-102	101.583	3.89018	918.333	TFRC;ZFYVE1;TSEN54;ZFYVE26;GTSE1;WDHD1;ATG3;DNTTIP1;MTHFD2;PSME3;ATF6;SLBP;ABCB6;SAR1B;CDCA5;MRPL18;NCAPG;CDCA8;IQGAP3;OAZ1;NCAPH;GABARAP;C12ORF57;CYB5R4;HSPH1;PRPF38A;MTERF3;PMM2;MRPL27;LARP7;LNPEP;BTBD10;MRPL30;TBL3;SASS6;SFXN2;DZIP3;C19ORF48;ARF4;LIN54;RPLP1;RPLP0;HEXA;HIST2H2AB;PRKAG1;ARHGAP1;PIGW;HIST2H2AC;TUBA1C;TUBA1B;ATIC;ENOPH1;DLGAP5;RMI1;KIAA1143;SIRT1;MRPL43;HIST2H2BE;MRPL44;MED28;MBL…
NFYA (E)	1325/2250	6.65316e-99	5.32253e-98	97.2739	2.5938	586.357	TDRKH;C5ORF22;ATF2;POP5;PGAP2;ARAF;TMEM97;F11R;ALKBH6;PTPDC1;ALKBH3;ZFYVE26;NSDHL;SYNGAP1;PSMD4;HIST3H2BB;PKNOX1;PRKACA;GTSE1;STARD7;NGDN;RFX2;ZFYVE21;DICER1;RC3H2;EML2;SCAMP3;SCAMP2;DDX39A;MTHFD1;MTHFD2;PRKAR1A;RFX5;TMEM126A;RABL3;TCEANC2;PSME2;FAR1;ATF7;TMEM126B;UQCRC2;SF1;SLBP;CDCA2;ZNF273;PARPBP;CDCA3;SHMT1;MRPL18;TPRG1L;C12ORF60;CDCA8;COPS7A;OAZ1;C12ORF57;HSPH1;GRPEL1;RDH11;AFMID;PIP5K1A;ATR…
E2F6 (E)	1767/3245	6.81129e-94	5.05981e-93	92.2959	2.21519	475.212	POP7;TFRC;F11R;PTPDC1;ALKBH2;TBK1;SCP2;KIAA1586;PKNOX1;ATG3;TSTD2;PRKAB1;MTHFD1;MTHFD2;ZC3H11A;FAR1;RABL6;SLBP;CDCA3;SAR1B;CDCA4;SHMT1;NPRL3;CDCA7;ZNF22;ZC3HAV1;AFMID;TOE1;TEX30;MTERF3;MTERF2;TIPARP;EIF2AK1;PBX3;LNPEP;FAM111B;FAM111A;FASN;STRN;SFXN2;C19ORF48;ZNF496;KCNC3;HOXC10;MED17;PCMTD2;CHAF1B;ATIC;SMPD4;CHAF1A;MED10;TCP11L1;ENOPH1;ZNF485;RMI2;GSTO1;TEX10;KIAA1143;BAZ1A;BAZ1B;DUSP7;DDB2;PLSCR…
NRF1 (E)	1118/1882	2.55737e-85	1.77311e-84	83.7513	2.60181	506.783	C5ORF24;POP7;NUP107;PGAP1;POP1;POP4;UXS1;ARAF;IL4I1;LSM12;TBK1;CAPNS1;GTSE1;ATG3;STARD7;ZNF281;ZNF12;GAPVD1;HDHD3;SCAMP3;EML4;EID2;ZFYVE16;MTHFD1;DDX39B;ZFYVE19;PSME3;AKIP1;UQCRC1;CLOCK;RABL6;SF1;CDCA2;CDCA3;RETSAT;MEAF6;SHMT1;MRPL18;NPRL3;MYNN;CDCA8;MRPL17;MRPL14;MRPL12;ZNF25;MRPL10;OAZ2;DEDD2;PRPSAP1;CYB5R4;PRKAR2A;FIGNL1;GRPEL2;PIP5K1A;AMZ2;RSU1;ATG7;ATG5;B3GALNT2;ZNF263;TIPARP;EIF2AK1;MRPL24;…
USF2 (E)	648/965	1.12474e-77	7.31078e-77	76.136	3.52086	623.832	ATF1;ATF2;GMFB;RNH1;POP1;GPATCH3;SMC3;ELK1;PTPDC1;GLS;PSMD9;ZFYVE26;RNF115;TBK1;STMN1;AP1S2;VPS35;DIP2B;PIP4K2C;MPV17;PKNOX1;IER5;XYLB;ATG3;VPS18;WSB1;RPL23;REV1;CD3EAP;GTPBP2;ATG14;RC3H2;SCAMP3;WDR77;EML4;RUFY1;SLC5A6;DEPDC1B;DDX39A;ZC3H11A;PSME3;ORAI2;TMEM126A;CDIP1;SRFBP1;TMEM126B;PI4K2A;SKAP2;RHNO1;OSER1;ANAPC13;SEH1L;ABCB6;SHMT1;COPS7A;VPS26A;WDR62;GNS;HIF1A;GABARAP;CIAO1;PPP3R1;LDHA;BLOC1S1…
PML (E)	955/1596	2.34644e-74	1.43547e-73	72.843	2.61177	442.795	ATF1;C5ORF24;POP7;TFRC;PSMD8;ALKBH2;IL4I1;RABGEF1;TBK1;PSMD4;PSMD5;ALKBH1;HIST3H2BB;WDR83OS;TYW5;TSTD2;STARD7;PRKAB1;SCAMP3;CD2AP;RUFY1;SLC5A6;MTHFD2;CLNS1A;UNC50;SAR1A;CDCA4;SAR1B;MYNN;ZC3HAV1;MRPL15;AAAS;OAZ1;NCAPH;GABARAP;C12ORF57;MRPL20;GUCD1;AFMID;GRPEL2;AMZ2;ATRIP;B3GALNT2;ZNF263;C5ORF34;TIPARP;EIF2AK1;LNPEP;BBIP1;BTBD10;MRPL21;MRPL22;DHFR;SETX;MRPL30;FASN;PSMG3;STRN;PSMG1;HNRNPA1L2;DZIP3;C…
CREB1 (C)	878/1444	8.26772e-73	4.7769e-72	71.3209	2.7056	449.066	C5ORF22;ATF2;POP4;GHITM;ZFYVE1;PSMD7;GPBP1;PSMD3;PRKACA;CHID1;DAXX;C5ORF15;DNTTIP1;MYL6;PSME3;RFX5;FAR1;ATF7;CGGBP1;SF1;SAR1A;MRPL18;MYNN;MRPL12;AAAS;C12ORF66;CIAO1;CYB5R4;HSPH1;ATG7;ATRIP;EDEM3;ZNF263;PRPF38A;JUP;NCAPH2;C20ORF27;LARP7;MRPL28;ERLIN2;SNF8;LARP4;MAGOHB;MRPL24;TBL3;ARF4;ARF1;PRKAG1;MRPL37;HOXC10;TRMT112;TUBA1C;LMBR1;TUBA1A;SMPD4;NELFE;DUSP3;RING1;ELOVL5;MRPL49;C6ORF62;MRPL47;NIPA2;J…
USF1 (E)	862/1423	2.634e-70	1.44177e-69	68.8411	2.67478	428.533	ATF1;GMFB;OSGEPL1;POP1;ZFYVE1;PTPDC1;SCAMP4;PSMD9;ZFYVE26;TBK1;SYNGAP1;ATG3;SETMAR;RC3H2;SCAMP3;EML4;RUFY1;DDX39A;PRKAR1A;ZC3H11A;ORAI2;ORAI1;CDIP1;UQCRC2;TMEM126B;SKAP2;ABCB6;CDCA4;SHMT1;TPRG1L;COPS7A;MRPL15;GABARAP;GRPEL2;PIP5K1A;ATG5;ZNF263;MTERF3;MRPL27;C20ORF27;CS;MRPL30;C19ORF47;SFXN2;AVL9;C19ORF48;LIN54;HEXA;SNX13;MRPL36;HOXC10;C12ORF43;TUBA1B;MED13;ATIC;CHAF1A;ENOPH1;LIN52;DFFA;DUSP3;TEX1…
E2F1 (C)	573/859	6.68888e-67	3.47822e-66	65.4586	3.42298	521.569	VPS29;IPO11;HNRNPR;TMEM97;DCAF7;GPATCH8;RRP8;IL4I1;PSMD5;GPBP1;FDXR;AKT1;AP1S1;RPL39;XYLB;DDX17;ACOT9;WSB2;RPL21;MAP1S;FRS2;HCFC1;DDX39A;RNF125;SCO1;DAAM1;RFX7;CLNS1A;HMBS;CDIP1;FAR1;UQCRC2;TMEM126B;NUP98;ZNF397;URI1;SEH1L;PRKDC;CDCA5;MRPL17;NOLC1;MRPL13;GNS;HIF1A;MRPL10;SKA2;BLOC1S6;BLOC1S1;MCMBP;PSMF1;LTA4H;S100A10;EDEM3;LYN;RPL41;JUP;H3F3B;ZNF260;NCAPH2;RDX;INO80;NR1D1;CDC6;PA2G4;HNRNPL;HNRNPM…
FLI1 (E)	462/650	7.7372e-67	3.83176e-66	65.4166	4.16718	634.359	NUP107;RPL34;SMC6;WDR89;PHB2;RPL6;RRP8;DCAF6;PSMD8;ALKBH3;GLE1;CNST;PSMD2;AP1S2;RPL38;RPL37;CHID1;DDX18;STARD4;DAPK3;DDX10;ARMC7;WDR73;PRKAB1;GANC;GTPBP4;MED7;IFT88;BIN3;DDX39B;SCO1;ZSCAN21;UNC50;TMEM126A;TBPL1;RPL27;SRFBP1;PI4K2A;SEH1L;NOLC1;COPS7A;AAAS;NCSTN;PRDX5;LDHA;CYB5R3;PPP4C;GRPEL2;VPS11;GAR1;RRS1;PLK4;NAA50;BARD1;BTF3;ZNF143;PRELID1;RPL41;ZNF384;C5ORF34;PRPF38A;TRIP4;LNPEP;BBIP1;RMDN1;P…
UBTF (E)	941/1631	3.3487e-62	1.58302e-61	60.8005	2.37575	336.292	TSEN54;LSM11;PPP4R1;GPBP1;PSMD3;PKNOX1;TYW5;ZNF281;ZFYVE21;FRS2;DICER1;FRS3;EID1;RFX7;ORAI1;TBPL1;CGGBP1;NLRX1;SAR1A;NCAPG;ZC3HAV1;IQGAP1;MRPL13;RHOT1;HMGXB4;PRKAR2A;HACE1;TIPARP;LRBA;PBX3;EXOC6B;LNPEP;BBIP1;UCK2;AGO4;FASN;PSMG2;ZNF496;ARF3;LIN54;ARF4;DIS3L;SNX13;CTCF;PIGW;PIGV;PANX1;MED14;NIPBL;MED13;FLVCR1;JAK2;FGFBP3;ENOPH1;APPL2;IKBIP;SS18;RING1;RMI1;ELOVL6;BAZ1A;NIPA2;MRPL48;JOSD1;DYNLL1;CCS…
MYC (C)	410/573	1.33175e-60	6.02183e-60	59.2203	4.24337	585.028	RPL4;RPL30;RPL32;TFRC;RPL31;EHMT2;GPATCH4;HNRNPR;TMEM97;RPL8;RPL6;RPL7;SCAMP4;LSM12;PSMD7;RPL36;RPL35;RPL38;RPL37;DUS4L;CHID1;DDX17;RPL21;MAP1S;RPL23;RPL22;WDR75;SOX12;DDX39A;RFX7;EWSR1;CLNS1A;YME1L1;JTB;RPL27;SRFBP1;RPL29;RPL28;SLBP;URI1;SET;SEH1L;PRKDC;CDCA5;SHMT1;CDCA7;NOLC1;COPS7A;AAAS;FAM160B1;BLOC1S6;GAR1;MCMBP;ZNF146;SLC19A2;ST13;INO80;PA2G4;ZNF35;MRPL23;GPN1;HNRNPL;UCK2;HNRNPK;HNRNPF;FASN…
SPI1 (C)	659/1056	4.37339e-60	1.89514e-59	58.7224	2.84457	388.795	MAML1;GMFG;CLEC10A;IPP;RPL8;WDR89;TSEN54;RPL6;GLS;ELK4;PCMT1;NUB1;RNF114;CNST;SCP2;TFG;AP1S2;RPL38;RTTN;RPL37;TMEM8A;DAXX;RPL23;DNTTIP1;WDR75;ARMC7;FRS3;GTPBP4;RUFY1;DDX39B;RFX7;RUFY4;CLPP;UNC50;GPR160;PADI2;RPL27;TARS2;SRFBP1;RPL28;OPTN;SF1;PRR13;CDC42SE1;NAA60;MTMR2;CDCA5;NAIF1;ZC3HAV1;ZNF24;MRPL12;CFP;OAZ1;ARPP19;MTMR6;GABARAP;C12ORF57;RRP7A;CYB5R1;PPP3R1;PPP4C;AMZ2;LTA4H;ATG5;LYN;ZNF263;CDK19…
ZMIZ1 (E)	574/914	1.62648e-53	6.76614e-53	52.1697	2.87186	349.077	MAML1;HNRNPU;WDR83;TMEM97;GABPB1;ELK1;GLS;NDST2;ELK4;TFG;MSANTD2;PSMD2;AP1S2;RPL36;PIP4K2A;HIST3H2BB;IER5;NFRKB;IER3;ACOT9;ACOT8;WSB1;CSNK2A1;DAPK3;REV1;GAPVD1;GANC;EML4;MYL6;TMEM126A;RPL28;VPS25;CDC42SE1;RETSAT;SAR1A;NPRL3;SKA3;NCAPH;PRDX5;RHOT1;PPP4C;PRDX1;ATRIP;NDFIP2;NDFIP1;CHKA;H3F3B;TIPARP;MAD2L1BP;IRF2BP2;MLLT11;TMEM199;FIBP;GLUD1;RNF103;EHD4;TDP2;FASN;TDP1;STRN;CDK13;ARF4;ARF1;BTG2;BTG1;M…
ZNF384 (E)	464/730	2.856e-45	1.1424e-44	43.9422	2.93984	301.53	VPS29;IPO11;SMC4;RPL6;RRP8;NUB1;PSMD7;TFG;CAPNS1;GABARAPL2;WDR75;DNTTIP2;IFT80;FRS2;AARSD1;MED6;RPL24;RPL27;NUP98;RBCK1;PRR13;ABCB6;CDCA5;MRPL18;ARPP19;HIF1A;CYB5R1;RHOT1;PTPMT1;MCMBP;NAA50;RPL41;ZNF384;PHC1;ST13;PMM2;MAD2L1BP;BBIP1;INO80;ERLIN2;CDC6;FAM136A;GPN3;HNRNPL;MRPL30;FAM111A;GLUD1;HBP1;SFXN2;AVL9;CDC42SE2;DENND1B;SETD3;CLTC;ADK;PRKAG1;SMG7;PIGV;TMEM186;MRPL32;MED18;FARS2;TRIM8;ING4;TUBA…
BCLAF1 (E)	523/851	1.04805e-44	4.03692e-44	43.3939	2.69568	272.983	VPS29;JRK;SLC4A1AP;NUP107;TFRC;HNRNPU;PHB2;ALKBH2;MTBP;SYNGAP1;ZSCAN31;CDK5RAP1;HIST3H2BB;RTTN;RPL37;DDX18;PRKAB2;MBNL1;TSTD2;HUS1;GTPBP2;FRS3;PRKAB1;KNSTRN;TBPL1;PIH1D2;SRFBP1;RPL29;VPS25;ASF1A;CDCA3;SAR1B;MRPL16;MTMR9;COPS7B;COPS7A;AAAS;MRPL13;C12ORF57;RIC8A;PRDX1;GRPEL2;ATG5;PLK4;RPL41;NFATC3;TRIP4;MAD2L1BP;ZNF35;MRPL24;MRPL21;PAFAH2;MRPL30;NPLOC4;LAS1L;AGO3;HNRNPF;C6ORF89;HNRNPD;SERPINI1;HNRN…
SPI1 (E)	840/1540	7.72182e-42	2.8681e-41	40.5424	2.05765	194.786	TSEN54;ALKBH8;FAM110A;SCAMP4;RABGEF1;ZFYVE26;PSMD7;WDHD1;ZNF284;NGDN;DNTTIP1;PRKAB1;RUFY1;MYL6;SCO1;PRKAR1B;PRKAR1A;ZC3H11A;ORAI2;SF1;ZNF277;ABCB7;MRPL18;NCAPG;COPS7B;COPS7A;IQGAP1;ZNF24;IQGAP3;OAZ1;NCAPH;GABARAP;HSPH1;ZNF267;ATG5;LYN;PBX2;NR2F2;BBIP1;NETO2;RPL17-C18ORF32;BTBD10;PTRHD1;EIF6;TDP1;MTMR14;HEXB;HEXA;SNX10;ZNF45;CTCF;OSBPL11;TUBA1B;SH3BGRL3;CTBS;IKBKE;APPL2;ZNF485;ZNF484;ELOVL1;RMI1;N…
CHD1 (E)	414/655	1.4373e-39	5.15446e-39	38.2878	2.88106	257.676	CHIC2;GABPB2;GPATCH2;HNRNPU;GABPB1;DCAF5;EPRS;SMC3;ELK1;NDST2;ZMIZ1;NAMPT;PIP4K2B;DIP2B;PKNOX1;RPL39;IER5;VPS36;PRKCI;WSB1;CSNK2A1;RPL22;CD3EAP;ATG12;HCFC1;EWSR1;YME1L1;ATF7;RPL28;ASF1A;CGGBP1;CDC42SE1;ANAPC13;SLBP;RPN2;ATXN7L3B;BCL10;DEDD2;FAM160B1;BLOC1S6;LDHA;ZNF148;S100A11;BTF3;ZNF143;NDFIP1;MTERF3;MEX3C;MLLT11;GLUD1;UCK2;GIPC1;AGO2;ARF4;ARF1;PHF23;MTMR14;RPLP1;CLTC;HIST2H2AB;PIGV;HIST2H2AC;P…
ZBTB33 (E)	435/702	1.83635e-38	6.36601e-38	37.1961	2.7345	237.602	RPL4;VPS29;ATF2;CHIC2;C5ORF24;POP7;TFRC;SMC5;GPATCH3;SMC4;DCAF6;PSMD5;CLP1;PSMD2;GPBP1;MED1;PIH1D1;RPL23;DNTTIP2;IFT80;WDR73;RC3H2;CLPX;WDR77;CD2AP;MTHFD1;RPL24;ATF7;ATF6;SF1;PARPBP;SAR1A;NPRL3;NCAPG;MRPL12;SKA3;CIAO1;C12ORF57;HSPH1;PTPMT1;PRDX1;SSR1;NRBF2;EDEM3;ICMT;NFATC3;C20ORF27;EIF2AK2;INO80;ERLIN2;RPL17-C18ORF32;MAGOHB;BTBD10;HNRNPK;FAM135A;C6ORF89;PKIG;DZIP3;ARF3;PIGN;CHURC1-FNTB;NCAPG2;HI…
STAT3 (E)	433/725	6.33049e-33	2.12378e-32	31.6729	2.48305	184.093	TES;PGAP2;MAML1;GLS;PSMD9;TFG;CREB3L4;NAMPT;RPL38;GSTK1;MBNL1;DAPK3;GTPBP2;ARMC1;SARNP;PSME4;RPL24;RPL27;TARS2;ATF7;SRFBP1;NUP98;TMEM126B;RPL28;ALG10B;ATF6;SKAP2;ANAPC13;RETSAT;RPN2;CDCA5;C12ORF60;IQGAP1;C9ORF72;C12ORF57;BLOC1S6;PRDX5;CEP70;SERPINH1;SLC19A2;NAA50;BARD1;TIPARP;RDX;IRF2BP2;INO80;GPN1;MRPL24;PAFAH2;MRPL30;ARL2BP;HBP1;LIN54;BTG2;SMG1;BTG1;HIST2H2AB;ARHGAP1;CHM;TMEM53;MRPL34;SMG5;HIST…
TCF3 (E)	481/840	2.60122e-30	8.45396e-30	29.0729	2.24603	153.003	ATF1;PI4K2B;HNRNPU;ENO1;GABPB1;DCAF5;DCAF6;FAM110A;NUB1;PPP4R2;ZMIZ1;GPBP1;PSMD3;STMN1;NAMPT;RPL36;CYP1B1;RPL35;NHLRC3;DNAAF2;CD2AP;RUFY1;RNF126;PRKAR1A;NHLRC2;ZNF397;MTMR1;SEH1L;HSPA4L;SKA3;ZNF25;HIF1A;PPP3R1;PRDX5;LDHA;BLOC1S1;FDFT1;GSDMD;H3F3B;TIPARP;LRBA;PBX3;ERLIN1;IRF2BP2;NR1D2;TMEM199;RNF103;NAPEPLD;MKS1;CDK13;ARF4;DENND1B;BTG1;MTMR12;PRKAG1;MRPL34;ING1;WDR43;SMG5;ZNF280D;TRIM8;TRMT112;TUB…
SP2 (E)	550/994	2.45625e-29	7.74092e-29	28.1112	2.08192	137.149	TDRKH;C5ORF22;JRK;PGAP2;MAML1;ARAF;GPATCH4;HNRNPR;ENO1;F11R;ALKBH6;DCAF4;DCAF7;RRP8;GLS;PSMD6;RNF115;CNST;CREB3L4;ZSCAN32;PSMD1;RTTN;VPS35;PRKACA;PRKAB2;ACOT8;STARD7;TSTD2;NGDN;DAPK3;RFX2;ZFYVE21;WDR75;MED4;FRS3;ZNF16;MED7;DDX39A;ZSCAN20;CLNS1A;SARNP;ZSCAN21;TBPL1;ATF7;TARS2;UQCRC2;NUP98;PRR11;PRR13;CDCA2;ANAPC15;CDCA3;RPN2;MRPL18;C12ORF60;NAIF1;MRPL12;SKA2;PRPSAP1;NCSTN;GRPEL1;PNPO;ZNF148;PROSER…
SIX5 (E)	594/1094	9.84702e-29	3.01203e-28	27.5211	1.99967	128.954	NUP107;RPL32;POP1;THYN1;RPL8;ZFYVE1;PHB2;RPL6;ALKBH8;RPL7;LSM10;SCAMP4;PSMD4;C19ORF53;CLP1;PSMD2;RTTN;CEP97;PRKCI;ZNF284;DNAAF3;SETMAR;CD3EAP;GAPVD1;GTPBP2;KNSTRN;SCAMP3;CLPX;DAAM1;ZSCAN20;ZFYVE19;ZC3H11A;CLPP;JTB;TCEANC2;RPL29;UBA52;ZNF277;TSTA3;NUP205;RETSAT;CDCA3;MRPL19;MTMR9;CDCA8;ZNF24;ZNF25;IQGAP3;ARPP19;ZNF26;CIAO1;MRPL11;DYNC2LI1;BLOC1S5;HSPH1;RDH11;NTHL1;RDH14;LTA4H;ZNF146;VTI1B;PROSER3;…
CEBPD (E)	423/734	1.58489e-27	4.70939e-27	26.327	2.27078	140.128	C5ORF24;PGAP2;TFRC;HNRNPU;ADARB1;ENO1;RPL9;RPL36;IER5;STARD4;RPL23;HDHD2;RC3H2;EID1;MYL6;ARMC6;HMBS;UNC50;RPL24;NUP98;VPS28;CDC42SE1;ABCB6;MTMR9;OAZ1;ADH5;PRPSAP1;C12ORF57;PPP3R1;RDH11;ZNF384;PRPF38A;H3F3B;NCAPH2;RDX;H3F3A;MAD2L1BP;CDC7;MLLT11;HNRNPF;OGDH;TNFSF9;RAD17;EZH1;C19ORF48;ZNF253;ARF4;BTG2;BTG1;RPLP1;RPLP0;HIST2H2AB;PRKAG1;MRPL39;CTCF;HIST2H2AC;TUBA1C;TUBA1B;C16ORF72;EFCAB2;ZNF367;ANXA4;…
RCOR1 (E)	406/702	7.03271e-27	2.03167e-26	25.6921	2.28743	137.747	CYFIP1;MAML1;ENO1;TMEM97;DCAF5;TSEN54;RRP9;NDST2;IL4I1;ALKBH2;ZMIZ1;AP1S2;RPL36;PKNOX1;IER3;GABARAPL2;PRKCI;ACOT7;DNAAF2;MAP1S;RFX2;ARMC7;FRS3;PRKAB1;KNSTRN;CD2AP;EML4;RFX7;CLPP;TMEM126A;VOPP1;ZSCAN29;CDC42SE1;NLRX1;SAR1B;SHMT1;HSPA4L;PRPSAP1;BLOC1S5;CYB5R3;PPP4C;CEP70;SERF2;NDFIP1;TIPARP;PBX3;MAD2L1BP;LNPEP;BRAF;HNRNPL;MLLT11;MEX3B;GIPC1;REL;FARSA;ARF1;ARPC1B;MRPL38;MRPL39;MRPL34;PIGV;WDR43;MCEE…
YY1 (C)	221/332	5.27646e-26	1.47282e-25	24.8318	3.28719	191.327	RPL4;RPL34;GPATCH4;GPATCH3;PSMD7;PSMD1;KAT8;MED1;DAXX;COG4;ECH1;NGDN;MRPS18A;ALG3;ATG14;KNSTRN;THAP1;WDR82;ZC3H11A;UQCRC1;RABL3;UBA52;NAA60;MACF1;SET;AARS2;INTU;MRPL19;MYNN;C9ORF72;ACTR3B;MRPL11;PRPSAP1;PRDX3;SNX4;BRIP1;ZNHIT3;VPS11;TRPM8;N4BP1;ZNF143;DTNB;ZNF260;PPP1R21;LNPEP;GPN1;MRPL21;RPS28;RPS27;SNW1;TRMT12;FARSA;CPEB4;ARF4;SUV39H2;MRPS15;MTMR10;WDR48;MRPS14;MRPS11;CCDC124;MRPL36;PEPD;OSBPL1…
TAF7 (E)	374/640	5.38147e-26	1.47282e-25	24.8318	2.34026	136.166	RPL4;JRK;NUP107;RPL32;TFRC;CCNI;RPL31;HNRNPU;KEAP1;HSF2BP;ADARB1;ENO1;GABPB1;NUDT5;RPL6;UBE2L3;PSMD8;RPS15;ALKBH2;RPS14;RPS16;TRIM28;RPS19;SNRPD1;CHEK1;RPL36;RPL35;RPL38;EIF2D;RPL37;IER5;RPS10;RPS13;ARL6IP6;RPS12;ARL15;COG4;ARRDC3;ALG3;ACSL3;ATG14;MFSD11;DDX39B;KCTD10;RPL27;RPL29;RPL28;MMADHC;HIST1H3J;PRKDC;SAR1B;CSTF3;MYL12A;C12ORF57;MRPL20;PRDX1;HIST1H3F;HIST1H3H;HIST1H3B;HIST1H3D;SNX5;RPL41;H3…
PBX3 (E)	658/1269	1.42486e-24	3.79963e-24	23.4203	1.8122	99.5041	TDRKH;C5ORF22;RPL4;GABPB2;PGAP2;MAML1;ARAF;HNRNPR;ENO1;GABPB1;DCAF5;WDR89;DCAF4;TSEN54;DCAF7;GLS;IL4I1;PSMD4;CREB3L4;GPBP1;ZSCAN32;RTTN;VPS35;MPV17;PKNOX1;PRKACA;IER5;IER3;ACOT8;STARD7;ZNF281;PIH1D1;NGDN;DAPK3;RFX2;ZFYVE21;SCAMP2;MED7;MYL6;DDX39A;MTHFD1;ZSCAN20;MTHFD2;ARMC6;SARNP;PADI2;ATF7;TARS2;NUP98;PRR11;ASF1B;PRR13;CDCA2;ANAPC15;CDCA3;RPN2;MRPL18;C12ORF60;NAIF1;WDR63;COPS7A;C9ORF78;HIF1A;GAB…
BHLHE40 (E)	226/348	2.35072e-24	6.11187e-24	23.2138	3.05778	166.366	EIF4A1;GMFB;WDSUB1;CISD2;ENO1;RPS6KA4;KAT5;BSG;STMN1;NAMPT;UBAP2L;SLC35A5;SEPHS2;XYLB;ATG3;DDX18;TSTD2;SLC35C2;RSAD1;REV1;SOX12;MRPS18C;DDX39A;RRAGC;ZC3H11A;PSME3;RFX5;SRFBP1;PFN1;OSER1;CUTA;ANAPC13;TEX264;EIF5A2;VPS26A;WDR62;GNS;HIF1A;GABARAP;MBTD1;HSPH1;SNX2;DHX33;SCAP;NUP88;TRPM7;PATZ1;ATP6V1C1;CTSA;ZNF263;SYNRG;ERLIN1;MRPL28;NR1D2;ERLIN2;NR1D1;MMS19;RCOR3;EZH1;RPAIN;LIN54;SMG1;MTMR12;PAK1IP1;…
NR2C2 (E)	226/350	7.35908e-24	1.86669e-23	22.7289	3.00797	160.223	NUP107;OGFOD3;GCC2;IKZF2;NUDT6;SCAMP4;PSMD9;LACTB;RPS14;ALKBH1;DHX57;PSMD3;RPL35;ARL6IP6;TYW5;BROX;RPL22;HUS1;THAP1;CLNS1A;YME1L1;RPL27;VPS28;ANAPC15;PARPBP;DHX8;CSTF3;CTR9;HMGXB4;ZNHIT3;DHX35;PCBP1;ARSK;PCBP2;ERI3;CSTF1;SCAP;NAA50;KNOP1;TMA7;BSDC1;INO80;LARP4;RPS26;RPS25;ZBTB6;LAS1L;PSMG4;RPS20;RPS21;KIAA0825;DCP1B;C2CD5;MRPS15;GFM1;MRPS10;MRPL33;UBL5;RSRC1;GABPA;MRPS28;BATF2;SHPRH;ZFR;MRPS23;PR…
SP1 (E)	395/707	2.69627e-22	6.67647e-22	21.1755	2.10532	104.561	TDRKH;C5ORF22;PGAP2;ARAF;HNRNPR;TMEM97;DCAF7;TSEN54;RNF114;PSMD4;CREB3L4;ZMIZ1;ZSCAN32;VPS35;PRKACA;ACOT8;DNAAF3;NGDN;RFX2;ZFYVE21;DDX39A;SARNP;PSME2;ATF7;SRFBP1;NUP98;PRR11;ASF1B;CDCA2;CDCA3;RPN2;NAIF1;CDCA8;C9ORF78;SKA2;C12ORF57;FDFT1;PROSER3;ZNF143;JUP;H3F3B;LNPEP;GPR137C;EEF1E1-BLOC1S5;HNRNPK;TDP1;HBP1;HNRNPC;C19ORF48;CEP89;MTMR12;RPLP0;MED19;TMEM53;WDR43;PQBP1;DDA1;MECP2;C16ORF72;CHAF1A;AIFM…
EGR1 (E)	312/537	2.56322e-21	6.19942e-21	20.2076	2.29629	108.874	CCNK;TFRC;CCNI;UXS1;KEAP1;TXNDC12;MKI67;ELK1;ZMIZ1;CLP1;MYB;DENR;KAT7;PRKACA;IER3;WDHD1;ATP6V1G1;TSTD1;BROX;REV1;RFX2;DICER1;SOX12;TMEM170B;FRS3;CLPX;FDX1;YME1L1;ORAI1;FAM76B;LAP3;EIF1B;ANAPC13;TMEM161B;SEH1L;SMIM4;CSTF3;MGST3;DCUN1D3;COPS7A;VPS26A;HNRNPLL;C9ORF72;GNS;ZNHIT1;PDCD11;PCBP2;AMZ2;ATP6V1C1;FAM120AOS;B3GALNT2;ZNF384;SURF1;SURF2;NR1D2;ANKEF1;NTAN1;MEX3C;TRERF1;SETX;MEX3B;TBL3;POLA2;NPLO…
TCF7L2 (E)	333/583	5.15343e-21	1.21808e-20	19.9143	2.20754	103.125	ATF1;ATF2;TES;PGAP2;TMEM41B;MAML1;PANK1;RTCB;GPATCH2;CISD1;HSF2BP;ACTB;DCAF6;TXNDC17;PSMD8;ELK4;TIAL1;UXT;SNRPD2;KAT5;ZMIZ1;PPAT;MAGOH;DPF3;RPL37;HMCN1;PTGFRN;FBXO8;AGFG2;MED1;STARD4;PRKAB2;SMARCC1;SCAF11;TINF2;YOD1;KNSTRN;THAP1;RRAGA;SPATA17;FAM76B;TAGLN2;NUP98;PRR11;CCDC82;ANAPC13;ANP32A;TSHZ1;MGST3;MRPL16;SUPT4H1;HNRNPLL;C9ORF72;ARPP19;SKA2;CYB5R4;PRDX5;AP5M1;PCBP1;PCBP2;CHST15;ZNF823;CSTF1;HI…
RUNX1 (C)	653/1294	1.31249e-20	3.0333e-20	19.5181	1.70866	78.222	CYFIP2;CHIC2;SCOC;GMFG;RAPH1;ADARB1;ENO1;F11R;EPRS;TSEN54;GPATCH8;DCAF6;NDST2;SCAMP4;NUB1;GPBP1;STMN1;HIST3H2BB;RPL37;PRKACA;IER5;STARD4;PRKCI;PIH1D1;HPCAL1;ARMC7;MTHFD2;PRKAR1A;ORAI2;PADI2;TCEANC2;CDIP1;ATF6;UBA52;ZNF397;CDC42SE1;CDCA5;NPRL3;CDCA7;MRPL14;MRPL12;ARPP19;DYNC2LI1;LDHB;PRDX1;CEP70;PIP5K1A;AMZ2;S100A11;SLC19A1;ATG5;NR2C2AP;S100A10;NFE2;ZNF143;NDFIP1;SIVA1;TIPARP;H3F3A;MAD2L1BP;IRF2BP…
FOXM1 (E)	80/95	2.73673e-20	6.18739e-20	19.2085	8.70899	392.296	GPSM2;ARL6IP1;HP1BP3;CCNF;KIF14;HJURP;HMGB2;NUCKS1;KIF11;MKI67;LMNB1;CDC20;FAM110A;PTTG1;NUF2;NEK2;SEPHS1;KPNA2;LBR;GTSE1;CEP55;HIST1H2AC;HIST1H2AB;HIST1H2AM;BORA;CKAP2L;GLRX5;H2AFX;CKAP2;DYRK1A;UBALD2;KIF23;KNSTRN;CKAP5;CDC25B;CCNA2;ASPM;KCTD9;PPM1B;INCENP;TRIM59;KIF20A;KIF20B;RCCD1;PRR11;HIST1H2BC;PARPBP;HIST1H2BO;CDCA2;TROAP;CENPA;NCAPH;SKA2;CCNB2;CCNB1;RACGAP1;RAD21;BRD8;FAM83D;HIST1H3B;CDKN2…
IRF3 (E)	365/663	2.98607e-19	6.60748e-19	18.18	2.03078	86.6233	TDRKH;C5ORF22;EIF4A1;TCERG1;PANK2;ULK4;ARAF;ZDHHC5;NUDT2;HNRNPR;CBLB;WDR89;DCAF7;TXNDC16;RRP9;NUBP2;CDC23;SNRPD2;RPL18A;CREB3L4;FLAD1;NIPAL3;FDXR;VPS35;ARL16;KAT7;FBXO5;PRKACA;AGFG2;ARL6IP6;ACOT8;DNAAF3;STARD7;NGDN;GOLPH3L;RECQL;ZFYVE21;DDX39A;ZSCAN20;THAP8;MTHFD2;EWSR1;SARNP;ZNF714;ARHGAP19-SLIT1;RABL3;TARS2;ATF7;PRR11;PI4K2A;ASF1B;CDCA2;ANAPC15;CDCA3;RPN2;MRPL18;NAIF1;C12ORF60;WDR62;SMIM7;ZBTB3…
FOS (E)	349/637	5.06307e-18	1.097e-17	16.9598	2.00643	79.9054	TDRKH;C5ORF22;EIF4A1;ISCA2;TCERG1;TES;NUDT2;HNRNPR;TMEM97;F11R;DCAF4;ALKBH6;DCAF7;NUBP2;CDC23;PSMD4;KAT5;FLAD1;CHEK2;NIPAL3;TRIM25;HIST3H2BB;ARL16;KAT7;MPV17;FBXO5;PRKACA;AGFG2;PDK2;TMPO;ACOT8;DNAAF3;NGDN;DAPK3;MCCC1;GOLPH3L;RECQL;ZFYVE21;ARMC1;DDX39A;ZSCAN20;RRAGC;MTHFD2;SARNP;ARHGAP19-SLIT1;FAR1;TARS2;ATP6V0D1;PRR11;ASF1B;PRR13;CUTA;CDCA2;CDCA3;RPN2;EPB41;NAIF1;OSGEP;SKA2;TMTC4;TTBK2;COMMD9;BLO…
ZBTB7A (E)	1010/2184	2.75628e-16	5.85007e-16	15.2328	1.45149	52.0033	JRK;POP7;NOC2L;TSEN54;LACTB;PSMD6;PPP4R1;CAPNS1;RAVER2;SUPT20H;TMEM8A;GSTK1;GABARAPL2;CSNK2A1;HPCAL1;FRS3;CD2AP;ZNF16;SCAMP2;MYL6;ZFYVE16;DDX39A;SCO1;RABL3;VOPP1;TBPL1;PSME2;MTMR2;CDCA2;MYNN;CDCA8;MRPL14;MRPL12;ZNF25;OAZ1;NCAPH;CIAO1;C12ORF57;RNF214;RHOT1;RDH14;AMZ2;HACE1;JUP;EXOC6B;PBX2;C20ORF27;MRPL28;LNPEP;FAM136A;MRPL23;SNUPN;VANGL1;MLLT11;MOV10;FASN;AGO2;PSMG3;STRN;AVL9;DZIP3;C5ORF30;EZH2;AR…
IRF1 (E)	163/263	3.64547e-15	7.58258e-15	14.1202	2.6727	88.8548	SMARCAL1;OGFOD3;UBE2L6;PPP2R2A;ARID4B;GPATCH3;IFI35;ELK4;NUB1;MT2A;HMGN4;NAMPT;UBAP2L;NBN;ATP6V1E1;DUS4L;B2M;TRIM21;TMSB10;RPS12;MCCC2;HIST1H2AM;HIST1H2AI;COG5;ACOT13;LIG3;HDHD2;FOXP1;DYNC1LI1;XRN1;PSME1;PSME2;CMPK2;RBCK1;PRR11;RAB5B;TXNDC9;SHC1;UBFD1;ZC3HAV1;SKA2;G3BP2;ZNF668;HIST1H3H;KDSR;B3GALNT2;PLK4;APOBEC3C;KLHDC3;SIAH2;SMARCA5;ISG15;PARP14;PAFAH2;PARP12;MOV10;FAM111A;FER;HIST1H4B;LSM6;APPB…
SRF (E)	179/299	1.88316e-14	3.84018e-14	13.4156	2.44713	77.3371	DCLRE1B;IPO11;PUS10;RNH1;RPL32;PRDM4;RIF1;POP4;NDUFA10;PDCD5;OGFOD3;THUMPD1;PLOD1;CARF;CCAR2;ACTB;ACTG1;EEF1B2;LACTB;KAT5;PSMD3;CFL1;STK16;GABARAPL2;FBXW5;GIN1;RPL22;ECH1;DAPK3;FBXW9;SSU72;MUL1;TEX2;CCNB1IP1;DHDDS;TMEM134;FANCD2;MAPKAPK2;RPL24;PPIG;PFN1;RAF1;VPS28;VCL;DGKH;COX19;ANAPC15;COX16;AASDH;BCL10;RASAL2;MYL12A;BCL2L12;CNN2;BLOC1S5;PGBD4;HMGXB4;ZNHIT3;NACC1;NPHP1;GRK6;CSTF1;RSU1;KDSR;MORC2…
KLF4 (C)	487/987	1.91576e-13	3.83152e-13	12.4166	1.61494	47.291	HNRNPU;WDR83;ENO1;RPL8;LSM12;ZMIZ1;DPYSL2;MYB;STMN1;RPL37;GABARAPL2;ACOT9;ACOT8;TYW5;CSNK2A1;RPL21;RPL23;RPL22;SOX12;MED4;PRKAB1;HCFC1;SLC5A6;SCO1;ZSCAN21;PRR11;SLBP;ANAPC13;SET;CDCA7;MYNN;GABARAP;ADH5;SKA2;C12ORF57;CYB5R1;PRDX1;GRPEL2;AFMID;RPL41;PHC1;ICMT;RDX;FN1;NFATC3;TRIP4;LNPEP;PA2G4;SNUPN;MLLT11;MOV10;SQLE;UCK2;GIPC1;C6ORF89;NMT2;LRRC34;RARG;HEXB;PHF23;CLTC;ARHGAP1;SNX10;ADM;CTCF;SMG7;TUBA…
NFIC (E)	165/279	8.4668e-13	1.66141e-12	11.7795	2.37117	65.9124	ACAA2;ECI1;ZBTB26;CCNC;LZIC;NUDT5;DCAF6;ICAM1;EFTUD2;RPS14;MT2A;LAMP1;FNTA;MPC2;HCFC1R1;CFL1;TRIM25;HIST1H2AG;SNRPD3;AZI2;HIST1H2AC;ZNF200;HIST1H2AB;PRKCI;TRAPPC2L;USP5;ECH1;GTPBP2;THOC6;EEF1A1;ACLY;OXA1L;SOAT1;WDFY1;GINM1;ATF7;SNRPE;ATP6V0D1;HIST1H2BD;HIST1H2BC;SEH1L;CDCA3;TWF2;TARS;UBR2;MYL12A;ACAT1;ZFP36L1;C12ORF57;GUCD1;LDHA;PMVK;ST3GAL5;ZNF148;HIST1H3B;ZBED5;FAM120AOS;CTSA;ACBD5;TIA1;DR1;ATP…
RFX5 (E)	295/559	9.71762e-13	1.87154e-12	11.7278	1.84021	50.8997	ISCA2;TCERG1;CCNK;PGAP2;PANK1;PITPNA;NUDT2;DDX60L;DCAF5;HYKK;ZSCAN31;PSMD3;AP1S2;AP1S1;B2M;AGFG2;ESCO1;ARL15;NGDN;RSAD1;ARRDC3;GOLPH3L;SOX12;EML2;ARMC1;MYL6;IFI27;MTHFD2;RFX5;SIK3;NUP98;PRR11;PI4K2A;ASF1B;CDCA2;VPS26B;SKA2;FXR2;GRPEL1;TRMT1L;FDFT1;PLK4;CDK19;APOOL;CHKA;INTS3;XRCC1;BBIP1;FAM111A;AIMP2;ALDH6A1;NPLOC4;EHD4;FASN;GIPC1;ZNF253;TOP2B;BTG1;SETD3;MTMR12;HIBADH;ZNF490;INTS10;TMEM53;MAGT1;Z…
PPARG (C)	280/535	1.24372e-11	2.35177e-11	10.6286	1.80595	45.3479	CHIC2;TES;WDSUB1;CLEC10A;HNRNPU;LIPA;ACTB;RNF114;TBK1;CCDC91;CYP1B1;CPT1A;ACSL1;ECH1;ATG10;MRPS18B;COG2;ZFYVE21;AARSD1;ACTN4;MED4;KNSTRN;CLPX;RUNX2;UHMK1;SLC5A6;RBP7;DYNC1LI1;RRAGA;POR;ARMC6;TBPL1;CDIP1;RPL27;TMEM126B;VPS25;MMADHC;GNE;RETSAT;MRPL16;MGST1;COPS7B;SMIM7;ANAPC10;GMCL1;DSN1;RHOT1;RRAS;FIGNL1;RAD21;PCBP1;HIVEP3;NRBF2;ATP6V1C1;CDT1;CRADD;XRCC2;XRCC3;SLC16A10;ERLIN2;MRPL21;HNRNPL;CS;STAG…
ETS1 (E)	99/156	1.31714e-10	2.44613e-10	9.61152	2.83363	64.4661	ISCA1;CCNT1;TACO1;SCAMP4;LAMP1;FNTA;TBC1D31;RPL35;SH3GL1;IER3;ATP6V1G2;FBXW11;IFRD2;NFKBIL1;GTPBP2;PRKAB1;THAP2;THAP6;KAT6A;XRN2;ADNP;ATP6V0D1;SRSF7;FTL;MYNN;TOR1AIP2;MYL12A;TOR1AIP1;DGUOK;GUCD1;KIF3B;UBB;AMDHD2;SNX5;KLHDC3;RPL41;DR1;NOP16;NFATC3;KLHL24;ERLIN2;HIGD2A;TBL3;NDUFAF7;SP4;ZNF655;CALM2;NFE2L2;HSP90AB1;NCAPG2;CLTC;HEXA;NAT10;OTUD7B;ADO;MEA1;SMG7;SMG5;RPS4X;BCL7C;XPO6;HMG20A;GUSB;HIST1H1…
NELFE (E)	137/234	1.89762e-10	3.46233e-10	9.46063	2.3084	51.6741	ARL6IP1;TFRC;GTF2B;ZFAND5;RPL10A;ACTB;GLS;ACTG1;ELK4;RPS16;BSG;STMN1;CFL1;NUSAP1;HIST1H2AE;RCC1;TRIM25;HIST1H2AD;HIST3H2BB;HIST1H2AG;OIP5;B2M;GLUL;RPL39;IER5;RPS13;HIST1H2AC;HIST1H2AB;MYLIP;RPS9;HIST1H2AI;ARL15;HIST1H2AH;RPS6;RPSA;MFSD11;EEF1A1;SRSF2;HIST1H2BF;SRSF3;UQCRC2;SRSF7;FTL;HIST1H2BC;DDX5;NDUFB11;UAP1;LIN7C;MRPL20;SDCBP;LDHA;PRDX1;PACSIN2;HIST1H3H;HIST1H3B;HIST1H3D;RBM10;SLC19A2;HSPA8;RP…
STAT5A (E)	134/233	1.52678e-09	2.73767e-09	8.56262	2.21099	44.8833	PANK3;NUP107;GDE1;COMT;FBXO22;UBE2L3;TXN2;TATDN3;LAPTM4A;HELB;CHCHD2;ZSCAN31;WDR92;UROD;FTH1;C1RL;ZNF207;HIST1H2AE;RCC1;HIST1H2AG;HIST1H2AC;SLC39A3;HIST1H2AB;PPP1R16B;HIST1H2AM;MORC3;HIST1H2AI;IMP3;HIST1H2AH;PGD;UHMK1;COX7A2L;THAP6;PRKAR1B;HMBS;FKBP8;SLC25A51;HIST1H2BD;SLC27A4;HIST1H2BC;HIST1H3J;SPATA2;TXN;MYL12A;PRPSAP1;C12ORF57;SOCS2;NPAT;CYB5R4;TMEM248;SWI5;HIST1H3H;BRIX1;HIST1H3B;NDUFV1;PNO1;…
ERG (C)	88/144	1.99434e-08	3.51545e-08	7.45402	2.56023	45.3938	N6AMT1;SLC35B4;PIGT;POP1;TACO1;GIMAP1;UBP1;MRPL33;SNAPC5;ABHD13;EFR3A;LAMP1;SNAPC3;NAMPT;GMPPA;SDF4;CAPN1;PKNOX1;RAB2A;PIAS3;TTC37;TIPIN;LYPLA1;SHPRH;ACSL1;RPL22;KCTD2;ACTR8;GNL2;SCAMP2;DDX39A;PSMA2;MTHFD2L;UQCRC1;ERP29;S100A4;UHRF1BP1;TLCD1;DNAJC8;TKT;SMIM20;SF1;SLBP;ENY2;ZNF592;CTR9;AK3;PHB;ZBTB44;CCNDBP1;USP19;PURB;GNG10;GRPEL1;EXOSC9;TP53BP2;HIST1H3G;CEP192;RALY;MAP4;RPP14;POLR2J;CNTLN;PAIP1;…
KAT2A (E)	58/90	3.9698e-07	6.88099e-07	6.16235	2.94705	43.4376	RPL4;FEN1;RBM26;HSP90AB1;GOLT1B;RPL32;ZWILCH;RPL31;RPL34;CLTC;PPP2R2A;GABPB1;RPL9;RPL6;RPS15;IL4I1;SLC39A9;CFL1;NUP62;RPL36;RPL37;ZC3H10;RPS7;RPS8;RPS6;RECQL;UCHL5;EEF1G;TRAF7;TMEM258;RPL24;RPL27;ERH;RPL29;PTMA;SNRPA;RPL12;RPL11;GBA;MRPL15;LIAS;RRAS;PCBP1;RPS3;RPL15;FADD;AKIRIN2;NUP155;TARBP2;UBAC2;ZNFX1;NACA;PHF14;CTNNB1;CALM1;CALM2;EIF3D;EIF4G3
ATF3 (E)	70/114	4.18972e-07	7.14312e-07	6.14611	2.58833	38.0108	OXNAD1;CCNT1;NUP188;ZFAND2A;CCDC124;WDR4;C1ORF35;TRIAP1;PWP1;LAMP1;UBE2Q1;EIF2B1;SLC35A5;SNAP29;ABT1;ATG3;ATP6V1G1;PDCD6IP;RPL23;VPS33A;NSMCE2;DNAJB12;RAD23A;SUPV3L1;METTL25;THAP8;FANCD2;SPNS1;ERP29;HNRNPH2;PPIG;ATP6V0D1;CACUL1;NAPA;SSNA1;TSR3;GTPBP10;TIMM13;NOLC1;KLHL12;NOC4L;WDR62;RNF139;BLOC1S1;AMDHD2;DPH3;EMC3;ATP6V1C1;CTSA;SYNRG;CCDC59;PTPN11;GTF2H1;HPS5;AP2B1;EIF2S2;GTF2H3;RANBP6;GNPTG;RAD5…
ZKSCAN1 (E)	72/120	1.0209e-06	1.71247e-06	5.76638	2.44027	33.6632	FAM49B;MCUR1;MTMR12;LPCAT1;NAT10;ELAVL1;ZNF48;UBE2L3;LMNB1;ALKBH2;CAPZB;GM2A;SLC22A18;AP1S1;TNFAIP8L2;FBXO9;PROSER1;STARD4;NHLRC3;ANXA2;H2AFY;HEG1;ITPK1;HPCAL1;COG2;SDHC;ACYP1;DUSP7;PSME1;SLC25A51;MICU2;ALDOA;ZNF236;TKT;SLFN5;SMIM4;GTF3C5;SLC43A2;ZDHHC20;HIGD1A;LAGE3;ARNTL2;MAPK7;SH3BP1;NTHL1;MKNK1;DNAJC21;STX6;S1PR2;TBL1X;WASF2;MAP2K6;UBE2F;BRAP;ANKRD27;SYNRG;ARHGAP27;BRI3BP;ICK;NECAP2;DHRS7;TAO…
CTCF (E)	776/1790	1.69229e-06	2.79363e-06	5.55383	1.265	16.8111	ATF1;JRK;POP7;TSEN54;ALKBH2;PSMD6;LSM11;PPP4R2;PSMD3;PSMD1;HIST3H2BB;XYLB;TYW3;NGDN;CSNK2A2;FRS3;PRKAB1;EID2;MYL6;MTHFD2;RUFY4;UQCRC1;ORAI1;NLRX1;MEAF6;MTMR9;MRPL17;AAAS;ZNF25;MTMR6;CIAO1;MRPL11;RNF214;RHOT1;AFMID;ABCA1;TIPARP;FUCA1;ERLIN2;FAM136A;MRPL23;MRPL30;FASN;AGO1;AGO2;PSMG2;PIGO;RPLP0;PRKAG1;HIST2H2AB;MRPL38;MRPL39;CTCF;MRPL34;PIGW;PIGV;HOXC10;HIST2H2AC;MED11;NIPBL;MED13;SMPD4;MECOM;EFCAB…
CEBPB (E)	82/144	3.68857e-06	5.99393e-06	5.22229	2.15204	26.9226	EIF4A1;CCDC47;DDX42;HNRNPU;TXNDC12;DBI;BRCA1;DUSP16;SMG8;ACTB;NARS;SYNCRIP;MIS18BP1;SIN3A;COTL1;SMARCAD1;HIST1H2AG;IL6R;HIST1H2AC;CAST;ABT1;GPX4;RPL23;BUD31;GTPBP2;RAD23B;RC3H2;LZTFL1;TNFRSF1A;PTP4A1;SLPI;NDUFS7;IRF2;NDUFS4;ETF1;GARS;TMEM9;RHOQ;PRR13;HIST1H2BC;CDC42SE1;PPP1R15B;PLEKHH3;HIST1H2BJ;BTF3L4;CUL2;TARS;TOR1AIP2;KLHL12;ZBTB44;UGP2;UBB;NFIL3;ERI1;PSMB3;EIF4EBP2;E2F2;TBL1X;ABCF2;SH2B2;UBE2…
CBX3 (E)	49/81	3.86392e-05	6.18228e-05	4.20885	2.48679	25.2689	C11ORF74;C17ORF75;GFM1;SLC44A1;CCNC;MSMO1;EFCAB7;ZNF280D;DSTYK;LAMP1;NUF2;CHP1;ZNF562;WDR36;CNTD1;AQR;RFC1;ZFR;COMMD2;DNAJC2;METTL25;LACTB2;ADNP;SFT2D2;ALG10B;ITGB3BP;TBC1D19;COX16;MRPL16;MRPS30;MAN2A1;HLTF;TBC1D13;THEM4;COA3;KRR1;VTA1;ATAD2;CCDC59;TRIP4;RPA2;ACTL8;AGBL5;PAXBP1;MNAT1;RBM45;NOP10;ATR;APOBEC3B
SALL4 (C)	172/355	4.63365e-05	7.30151e-05	4.13659	1.53255	15.2942	NDUFA13;UBE3C;ZFAND5;UBE2D1;FBL;HMGN5;TRIM28;LIPH;STMN1;ARHGDIB;TRIM25;FBXO6;SLC12A6;PELO;FAM81A;ABT1;MAP2K4;BNIP3L;PRKCI;ACOT7;WSB2;SCAF11;RPL23;UBE2E3;USP3;FRS2;UBALD2;DPM1;MSH6;PPA2;TBL1XR1;RUFY3;HMBS;TIMELESS;SUCLG2;PRKCQ;TLN1;AJUBA;HIST1H2BC;IGSF6;SDC4;PEF1;CUL1;TOR1AIP2;NREP;NID1;PLA2G7;ADIPOR2;UBE2J1;ARHGAP12;STRIP2;UBB;FIGNL1;STK38;SERPINH1;HIST1H3H;ECT2;SLC38A2;NADK;CDK19;NDFIP1;PARP16;C…
TRIM28 (E)	66/120	0.000133034	0.000206501	3.68508	1.98583	17.7233	ZCCHC10;HSP90AB1;CCNT1;IPO4;CRKL;TXN2;TATDN3;CHCHD4;TMEM43;AIFM1;UROD;NUF2;HIST1H2AG;SKP2;ZNF562;PIAS3;RPS7;SACM1L;RSBN1;UCHL5;TTI2;LMBRD2;FKBP8;SDE2;SNRPE;PPIG;AURKAIP1;SRSF7;PRIM2;DDX5;RABGAP1;COX16;HIST1H2BJ;POLDIP3;YTHDC2;GBA;MTIF2;TFPI;TOR1AIP1;NSL1;ZMPSTE24;C12ORF57;WRN;RBBP5;HECTD3;CFAP69;ZNF426;FEM1C;TBL1X;TSNAX;TIPARP;UTP3;CBX1;BSDC1;MAD2L1BP;ERAL1;KLHL20;AGBL5;ZNFX1;HNRNPF;REEP3;HIST1H4…
RELA (E)	224/484	0.00014659	0.000224197	3.64937	1.40569	12.4093	RPL31;CXORF21;GABPB1;IKZF3;ACTB;ICAM1;FAM110A;RPS19;MYB;GPBP1;ARL6IP5;RCC1;EPC1;IER5;B2M;IER3;TMPO;C17ORF49;TYW3;HNF1B;GTPBP2;MFSD10;DDX39B;RFX5;NINJ1;YME1L1;ORAI1;UQCRC2;PFN1;RWDD2B;STXBP3;ZBTB1;NOLC1;BCL10;PIK3R1;TXN;MYL12A;HMGXB4;SYNGR2;RRAS;PCBP1;HIVEP1;CEP192;ZNF267;VASP;TIPARP;TRIP4;PBX2;MAD2L1BP;IRF2BP2;RMDN1;GPN1;MRPL30;BST2;RPS28;REL;ANP32E;HIST1H4H;HIST1H4I;INTS6;CDK13;CALM2;DZIP3;BTG1;…
IRF8 (C)	66/121	0.000184243	0.000277699	3.55642	1.94956	16.7648	RTP4;ERCC6L;CIITA;HSP90AB1;PTPRJ;N4BP2L1;IFI35;IDE;SMG7;CTSS;HOXC10;TNFSF13B;IFIH1;ZFYVE26;KYNU;EPSTI1;CASP1;LGALS8;TRIM21;CD53;DTX3L;DDX58;TAP2;TAP1;CTPS2;ZFX;GANC;TAPBP;PARP8;SLFN13;ZEB2;LSG1;ELF4;ERP29;PSME2;RBCK1;TLR4;IRF9;TMEM87A;CNP;CSTF2T;VPS26A;ZC3HAV1;USP18;AIF1;TOR1AIP1;PSMB10;TBRG1;TMEM168;FAM168A;HLA-DMB;UCP2;FOPNL;BCAP31;CD74;DENND4B;MX2;STAT2;ERAP1;PARP14;PSMB8;PSMB9;MOV10;TMEM116;N…
SOX2 (C)	344/775	0.000192228	0.000285596	3.54425	1.30497	11.1664	SMARCAL1;IFITM1;IFITM2;HNRNPU;TXNDC12;TIAL1;SPIC;TRIM28;RPS19;CHORDC1;STMN1;ARL6IP5;HIST3H2BB;EPC2;KAT7;FBXO5;PTGFRN;GOLGA7;TMEM8A;AGFG2;DDX17;CPT1A;DNAAF3;ARRDC3;FRS2;ATG14;ARC;TWSG1;PDE12;CD109;ZW10;XRN2;RRAGD;VDAC1;PRR11;SKAP2;SMIM3;ANP32A;CDCA5;TSHZ1;CSTF3;ZC3HAV1;SKA2;LDHB;SNX1;RRAS;PDGFC;HLTF;HESX1;ST3GAL4;HIST1H3H;HIST1H3I;TP53BP1;HIST1H3C;NR2C2AP;FDFT1;MCTS1;RABGAP1L;PHC1;DTNA;JUP;H3F3B;D…
FOXP2 (E)	91/178	0.000291008	0.000426265	3.37032	1.70053	13.846	DPAGT1;HERPUD2;WDR48;BTG1;RIF1;MCM7;HIBADH;HMGB2;TNFAIP1;DHTKD1;PPP1CB;DUSP11;PPP1CC;SPRED2;MRPL40;FNTA;UBE2Q1;OPA1;CLP1;EPC2;UBL7;BCKDHA;BNIP3L;TSFM;TSC22D4;SCAF11;PIH1D1;BROX;MSL2;UCHL5;SAP30;FOXP1;DHX40;METTL25;RAP2A;KAT6A;CTDSP2;RPL27;PABPC1;AIDA;FAM8A1;CBLL1;SLBP;UBA6;WBP2;TIMM9;MAZ;TPRG1L;PPOX;CORO1C;STK3;STX10;HIRA;EXOSC5;SPAST;RRAS;ZNHIT3;PCBP2;SPOP;TBL1X;DISC1;WASF2;EIF4B;ZNF740;CD55;SEC…
NFE2L2 (C)	441/1022	0.00050017	0.000722468	3.14118	1.24193	9.4394	ATF1;CHIC2;C5ORF24;PGAP1;SMC5;ABCA12;SLC4A4;DCAF6;LACTB;SPIC;RNF115;PPP4R2;ZMIZ1;CYP1B1;CACNA2D3;KNSTRN;MTAP;ZC3H11A;AKIP1;ALG10B;ASF1A;PI4K2A;PRR13;OSER1;ABCB6;MRPL14;ATXN7L3B;ZC3HAV1;MRPL13;C12ORF66;PRDX1;PDGFC;CEP70;CHST15;ST3GAL4;NUP88;ZNF148;ST3GAL1;ATG5;FDFT1;B3GALNT2;CDK19;HACE1;APOOL;LRBA;FN1;IRF2BP2;NR1D2;RMDN2;NR2F2;NETO2;MAGOHB;PRDX6;PBX1;GIPC2;STRN;PSMG1;HBP1;MMS19;C5ORF30;PHF3;BTG1;M…
GATA2 (C)	336/772	0.00115641	0.00164749	2.78318	1.2581	8.5078	LTV1;ISCA2;C5ORF24;SLC35B4;CMAS;HPSE2;ZDHHC7;IKZF1;F11R;FNBP1L;LIPA;DCAF6;FAM110A;ZNF609;LSM11;CCDC91;ZMIZ1;CHEK2;PSMD3;ZXDC;TNFSF10;ARL6IP5;PIP4K2A;CPNE2;IER5;TBC1D22B;CMKLR1;MEF2C;MBNL1;ACOT7;ATP6V0E1;SCAF11;NSMCE2;SLC35C1;RFX2;ACTN4;PRKAB1;PISD;MYL4;NIF3L1;PPA1;NINJ1;PRKCQ;ZFPM2;ATF6;MTMR2;INTU;CTR9;SUPT4H1;PIK3R1;GNS;PRPSAP1;PGBD2;HMGXB4;TESPA1;HLTF;ERI3;HIVEP1;ZNF823;ATP6V0A2;TSPAN5;ST3GAL1;…
HDAC2 (E)	85/175	0.00318881	0.00448157	2.34857	1.53386	8.81681	INTS12;TTC26;DGKE;USPL1;KDM1A;CTCF;NAGPA;LMNB1;PPP1CB;PSMD9;DTWD1;LMBR1;HINT1;TUBA1B;RPS19;KIAA1586;PSMD3;REV3L;SLC25A40;FAM3C;GOLGA7;SVOP;ANXA5;NDUFC2;WRNIP1;ANO6;ZHX1;NEIL3;PPM1B;PHOSPHO2;RAP2B;PKM;DBF4;NDUFS7;DNAJC5;SLC25A51;GINM1;PGAM5;KCTD18;ASF1A;NAPA;LRRC59;SMARCD2;TXNDC9;AHCY;ABCB6;USP12;UBFD1;RTN4;FAM117B;CYB5R4;SPAST;TBL1X;CD58;CENPU;NQO1;RABGAP1L;YTHDF2;ZHX1-C8ORF76;TIPARP;WDYHV1;LNPEP…
TCF3 (C)	422/1006	0.00682102	0.00945848	2.02418	1.17891	5.8801	POP5;GABPB2;MAML1;ENO1;SMC6;ELK4;SPIC;CAPNS1;STMN1;DIP2B;TMEM8A;PRKAB2;PRKCI;WSB2;RPL21;DNAAF3;ZNF12;SOX12;CD2AP;EML4;SLC5A6;CPED1;WDR82;ZC3H11A;PLBD1;TCEANC2;PRR11;HOXB6;ASTN1;CDC42SE1;SET;MAPKAP1;SKA2;C12ORF57;LDHB;CYB5R4;HMGXB4;PRKAR2A;PDGFC;VPS11;CHST15;SERPINH1;PIP5K1A;BARD1;CDK19;PHC1;RDX;FN1;NFATC3;LARP7;NR2F2;INO80;GPN1;VANGL1;GLUD1;UCK2;AGO1;HNRNPD;SFXN1;EZH1;RNF220;ZNF496;RARG;MTMR12;HE…
VDR (C)	40/76	0.00726758	0.00994511	2.00239	1.80175	8.87244	SP100;UBXN2B;CAB39;KDM1B;TXNDC11;DDX60L;GCC2;MSMO1;CYP19A1;TMEM241;RAD51AP1;AP3M2;DTWD1;PPP1R2;EPSTI1;RAC2;IL21R;MCL1;BNIP3L;SLC37A2;CRTAP;CRADD;SP110;ENTPD7;VPS13A;SMARCA5;VPS37B;NMI;RPRD2;SULF2;XRN1;RFT1;ARHGEF2;PABPC1;HIST1H4J;CD69;TRIM38;SFT2D1;SERINC2;PTPN2
STAT3 (C)	83/177	0.0109447	0.0147825	1.83025	1.43319	6.47071	ITGB1;CPNE8;CMAS;ARL6IP1;USP32;IKZF1;CROT;HK2;GLS;ICAM1;NFU1;HELB;KIAA1109;PSMD7;SFR1;XPO6;NAMPT;KPNA4;AGFG1;PAQR8;HELLS;DDX59;CERS6;EIF1AX;ZFR;EMP1;MED4;RUNX3;YWHAZ;ZSCAN20;KAT6A;PABPC1;SLC27A2;VPS28;CDH18;SKAP2;GTF2A2;CIPC;ODC1;TWF1;ATP10A;PIK3R1;PLD1;MLLT3;RTN4;ZFP36L1;SOCS2;LDHB;ORC4;ANKMY2;CUX2;SH3BP1;ARL13B;UBR5;DYM;CAMTA1;UBTD1;RBBP6;CDK19;NDFIP1;PNPT1;MAP3K1;STAT1;PLCL2;CYP51A1;STAT3;HPS3…
ZC3H11A (E)	62/129	0.0138884	0.0185179	1.73241	1.50114	6.41991	RBM28;NUCKS1;CLU;PIGV;BEST1;APMAP;DNMT3B;DIP2B;FBXO8;RGS9;RNF43;ATP6V1G2;DUSP3;TANGO2;NFKBIL1;ARRDC3;FAM207A;TIMM22;ARMC8;RHOF;ATG13;COMMD7;DUSP23;RAD51D;MAPKAPK3;ALS2;PDE12;ZNF639;TRAF5;GARS;ISCU;TIMM9;ATL1;COX17;ARL1;GNAI3;RAD51AP1;SOCS2;NFIL3;TRA2B;CEP70;TBC1D14;STAT6;MAP4K5;SMARCE1;TRAPPC3;TRMT10A;CHTOP;WDR18;ERAP1;RAB27A;PEX10;NSFL1C;POLA2;GNPDA1;CMSS1;PSMC3;KIAA0586;AGO2;GPR107;CEP44;BCL2L1
BCL3 (E)	122/273	0.0160088	0.0210749	1.67624	1.31208	5.42495	FAM49B;C5ORF24;NDUFA13;ARL6IP1;ECI1;ROGDI;WBP1L;ACTB;TM7SF2;PYCARD;LAMP1;TRAPPC12;PIP4K2B;IER3;NANOS1;WDR83OS;MBNL1;RPS7;FBXW9;RPS6;DNAJB14;SCAMP3;EEF1A1;POLG2;KAT6A;PRPF3;ULK3;ADNP;PFN1;PHPT1;VPS28;HIST1H2BD;ANKRD17;NDUFB10;CNP;FUT11;MAZ;SUPT4H1;NOLC1;WDR61;PMF1;GABARAP;C12ORF57;UBB;AMDHD2;INPP5K;MLEC;EIF4EBP3;ZNF146;NMB;PPAN-P2RY11;CCDC138;DENND4A;SYNRG;NR1D2;TMEM230;MOV10;EIF2S3;NDUFAF4;SP3;RE…
HNF4A (E)	523/1276	0.0186785	0.0242821	1.61471	1.13274	4.50873	PGAP1;TSEN54;DCAF6;ELK4;ZSCAN32;XYLB;GSTK1;WSB1;C5ORF15;NUP210;STARD7;HPCAL1;DNTTIP1;HUS1;C9ORF64;RFX7;GPR160;FDX1;ACOT2;VOPP1;ORAI1;PSME2;CDIP1;RPL27;CFAP97;VPS28;FTCDNL1;PRR13;SEH1L;ABCB6;GATA4;CIAO1;MRPL20;BLOC1S5;CYB5R3;AFMID;PNPO;RDH14;NRBF2;SLC19A2;LYN;GSDMD;TIPARP;NFATC3;IRF2BP2;LNPEP;NR1D1;FAM136A;VANGL1;EIF6;TDP2;C6ORF89;GIPC2;RAD17;SFXN1;GTF2IRD1;HBP1;PKIG;EZH1;RAD18;LIN54;MTMR10;NRSN2;…
FOXA1 (E)	93/205	0.0209005	0.0268352	1.5713	1.34758	5.21243	LIN54;CHIC2;UHRF1BP1L;WDR48;BTG1;CXCL8;HIBADH;MCM7;ITGB5;MTMR14;NKAP;ARHGAP1;HMGB2;TNFAIP1;ARRB2;EFCAB11;SH3RF1;DHTKD1;DUSP11;ING2;PSMD7;HYKK;TCP11L2;PLS3;LIN52;IKBIP;RMI2;MANBA;APAF1;PIH1D1;ARRDC2;SLC35C2;DAPK3;UBALD2;SOX12;ZFX;UTP18;DUSP6;FOXP1;SMC1B;KIF9;MSH2;RPL7L1;NINJ1;PSME4;MCM4;LCORL;EAPP;DAGLB;CBLL1;GTF3C2;ASAH1;ELOF1;SLC20A2;UHRF2;PRKDC;MAZ;TPRG1L;TANK;MYL12A;STK3;MBTD1;PCNP;ENOX2;STK35…
PPARD (C)	126/285	0.0212136	0.0269051	1.57017	1.28676	4.95803	MTCH2;ACAA2;POP1;IRS1;CBLB;PLOD1;EPRS;SLC4A4;ALKBH8;PREX1;EFR3A;CDC23;RPS16;C19ORF53;FTH1;ACSL5;ACSL3;TMEM135;MELK;CHMP4B;MGARP;FTL;HIST1H2BC;RNASEH2C;ENY2;LXN;CUL2;UBR4;ABHD6;BRIP1;ZMAT2;ATP6V1H;CPA5;DNAJC19;SMURF1;SIAH1;PMM2;EXT1;GGCT;HIST1H4B;CNOT11;CDC16;DNAJC10;HIST1H4H;PI4KB;TGFBI;STT3B;HIST1H4C;DCP1A;KLHDC9;INVS;MRFAP1L1;MRPS11;COX4I1;AP2A1;DBI;ETFA;MRPL34;MRPL35;SH3RF1;TRIM8;DTWD1;LASP1;A…
NANOG (C)	251/595	0.0238674	0.0299061	1.52424	1.18656	4.43209	IFITM1;IFITM2;SPARC;CCP110;ENO1;F11R;TIAL1;SPIC;LIPH;CHEK2;ARL6IP5;TRIM25;EPC1;KAT7;PTGFRN;GLUL;TMEM8A;WSB2;FRS2;ACTN4;ATG14;TWSG1;RNF125;MTHFD1;WDR82;ZW10;XRN2;PRR11;PRR13;SET;L3MBTL2;CDCA3;ANP32A;TEX264;CSTF3;DCUN1D3;NOLC1;ZC3HAV1;RPAP1;OAZ2;SKA2;LDHB;FIGNL1;CHST10;PDGFC;HESX1;CSTF1;HIST1H3I;TP53BP1;ZNF148;HIST1H3C;MCTS1;PHC1;MYO5A;LNPEP;VANGL1;EXT1;MOV10;GLUD1;LPAR6;ID2;RPS21;RPS23;RARG;MTMR12…
POU5F1 (C)	115/261	0.0296032	0.0366516	1.43591	1.27849	4.50011	IFITM1;IFITM2;RIF1;HNRNPU;NUCKS1;ENO1;OLFML2A;EEF1B2;SPIC;ZMIZ1;LIPH;EPC1;KAT7;OSTF1;ENTPD1;ALG8;ZCRB1;CDYL;TMEM131;MSH6;KCTD9;ADNP;TLN1;HOXB6;SET;CDCA5;CDCA7;RPAP1;ADIPOR2;ZFP36L1;SOCS2;UBB;UBR7;PDGFC;TBC1D13;HIST1H3I;TP53BP1;PATZ1;MAP2K5;MOAP1;PHC1;HIST1H4K;PTCH1;EPHX2;CBX1;CNOT10;TOR1B;MOB4;DIAPH1;STAG1;UCK2;LPAR6;FASN;ID2;AGO1;REEP3;MKRN1;ZFP64;TCF3;WRAP53;RARG;HEXB;CLTC;HK2;DUSP12;SPRED1;ACP…
EGR1 (C)	136/315	0.0387988	0.0474715	1.32357	1.23332	4.00751	TDRKH;TCERG1;CHIC2;IFITM2;VARS;ZFAND4;RIF1;GOLIM4;UBP1;UBE2L6;EDC3;RPS6KA3;CLP1;KHSRP;ZNF207;AKT1;KPNA3;PIAS4;SLC11A1;TANGO2;DDX10;PRPF4B;ACTN4;KCTD3;PPIH;TRIM11;CFB;LLGL1;BLZF1;FKBP5;STXBP3;CDCA4;PRKDC;ARL1;BCL10;CAMSAP1;PRPSAP1;SDCBP;LONRF3;SRPK2;IVNS1ABP;JUP;GOT1;H3F3A;ERLIN1;LRRC61;HOOK3;MEX3C;SLC6A6;STAG2;SP1;HNRNPF;NDUFAF4;CNOT2;FGFR1OP;HBP1;DEGS1;MYD88;ZNF652;MOCS2;PIGU;CXCL9;COLGALT2;SERP…
GATA1 (C)	331/807	0.0505485	0.0611285	1.21376	1.13064	3.37477	ATF1;IFITM3;C5ORF24;TFRC;HPSE2;ZDHHC7;IKZF1;F11R;LIPA;ACTB;NUDT3;DCAF7;AQP1;FAM110A;UBASH3B;ZSCAN31;WDR92;ZMIZ1;FTH1;BSG;RPS6KA1;DPF3;ROPN1L;IER5;GLUL;TBC1D22B;MBNL1;RSAD2;ARL15;NSMCE2;HPCAL1;RFX2;NSMCE1;COG2;ACSL5;GAPVD1;ATG14;PRKAB1;RUNX3;AFG3L2;DEPDC1B;EWSR1;CRISPLD2;BOLA3;HMBS;FAM76B;TARS2;PRKCQ;TTLL12;ZFPM2;SKAP1;MACF1;MTMR3;CDCA4;EPB41;NPRL3;CTR9;ENDOD1;AGAP1;ZC3HAV1;PIK3R1;RPAP1;PIK3R6;DED…
FOXA2 (E)	133/316	0.0850073	0.101618	0.99303	1.17889	2.90599	ATF2;UHRF1BP1L;PUS10;RIF1;CPOX;ZDHHC2;CLGN;PPP1CB;MT2A;TRAPPC12;EPC2;LGALS8;RNF43;C5ORF15;PIH1D1;HIST1H2AK;DAPK3;UBE2E1;UBALD2;SOX12;KCTD3;CASD1;FOXP1;XRN1;CCNE2;MSH2;PSME4;UHRF1BP1;RIN2;ATF6;SLC35D1;TPRG1L;DCUN1D1;SPATA2;HTATSF1;STK35;AFMID;HACL1;ZNF148;ARSB;TIA1;OSBPL6;CBX2;LNPEP;HELZ;DHCR24;NR2F2;SMARCA1;LARP4;SRPK1;ALDH6A1;STAG2;TMEM98;REEP4;ID2;MDM2;HBP1;STRN;HIST1H4C;CNOT8;ZNF775;UBE2K;WDR4…
TRIM28 (C)	87/210	0.184677	0.218254	0.661037	1.14596	1.9357	PTPRU;GSK3B;IPO11;PROS1;CETN3;HSPB1;FARS2;PTPRG;MED14;MECOM;ENC1;RCC1;ITGAV;FAM3C;HMGN3;LBR;PAQR8;EOMES;PPP1R12A;PARP1;CMC2;IPMK;LIFR;ACSL3;ZNF12;VRK2;TERF2;ZDHHC17;TSN;MSH6;ARL4C;GNPAT;ARL4A;RAP2B;CREB1;ALS2;ADORA2B;NUP50;KCTD12;TOP1;TKT;PTMA;OPTN;EXOC2;CERS2;ATL1;ODC1;CUL2;ARL2;HIF1A;RAB20;ERI1;RAB29;IGFBP7;LRIG2;BUB3;CD55;PMS1;SMAD1;CHKA;MMAA;STAT1;MTX2;XRCC2;PTCH1;TXNRD1;CCDC58;NEK7;MYO5A;GGH…
SMC3 (E)	465/1181	0.204572	0.23905	0.621511	1.05395	1.67245	POP7;TSEN54;RRP9;ALKBH2;PSMD6;LSM11;ZMIZ1;CDK5RAP1;RPL36;RPL38;DIP2B;VPS36;XYLB;VPS18;REV1;MED4;FRS3;CPED1;EID2;RNF126;RUFY4;GPR160;UQCRC1;ORAI1;RBCK1;ALG10B;OPTN;ASF1B;NLRX1;TPRG1L;MTMR9;MRPL17;VPS26A;AAAS;CIAO1;RNF214;CEP70;RRS1;NHEJ1;ABCA1;TIPARP;FUCA1;ERLIN2;FAM136A;MRPL23;PAFAH2;SLC16A14;TBL3;MEX3B;AGO2;PSMG2;CDK13;BTG1;MRPL38;WDR41;MRPL39;SMG7;PIGV;LYST;HOXC10;MYOM3;MED11;FAM102B;MED13;SMPD…
AR (C)	427/1095	0.299159	0.345695	0.461307	1.03615	1.25041	PTPDC1;RPL7;ALKBH3;ZFYVE26;WLS;DDX18;MEF2C;ACOT7;TRIQK;HPCAL1;CACNA2D3;LRRC37B;CTAGE1;CNBD1;ARMC1;MTHFD1;RFX7;CLPP;SPARCL1;ATF6;ZNF277;ANAPC13;MTMR2;URI1;CDCA2;PRKDC;MRPL18;MTMR9;ZC3HAV1;BCL10;PRDM11;FAM171A1;PRDX5;RDH11;RAD21;ABCA1;BARD1;ARL14EP;TPRG1;LRBA;CDC7;NR2F2;PBX1;SLC16A14;DHFR;VANGL1;GLUD1;EHD4;TADA2A;PSMG1;GALNTL6;SERPINI1;C19ORF48;CEP89;RPLP1;PRKAG2;TCF20;PCMTD2;LMBR1;TRIM7;MECOM;AIFM…
ZEB1 (E)	42/106	0.417069	0.47665	0.3218	1.06202	0.928743	MRS2;GSK3A;SP100;MGST3;SF3B6;F11R;TMEM141;SAV1;IFIH1;ZNRF1;DEAF1;SCRN3;NIPAL3;CTNNA1;FLNA;CIR1;STX3;LRRC8B;ACP1;STPG1;ACBD6;CYB5A;PCYT2;JUP;ATMIN;LRBA;TAF11;RASSF7;AP3B1;OSGIN2;PPM1B;TTLL5;GOLPH3;ZFP62;ULK3;POLR1D;PCYOX1L;TACC3;SLC25A51;DHCR7;HIST1H4C;LNX2
ESR1 (C)	53/154	0.854146	0.96419	0.0158372	0.84789	0.133673	CXCL9;SERPINA1;RASEF;PCTP;LITAF;ACTB;RERG;ASGR2;PTBP1;CASP7;PDK4;CYP1B1;GNPNAT1;SLC39A8;LMCD1;CTSD;RALGPS2;ACSL5;MED4;IL17RA;PTP4A2;PCCA;SLC9A8;KIFC3;TOP1;FKBP4;SLC29A1;SEMA3C;TARS;NT5C2;ZFP36L1;FXR1;UBB;NFIL3;NRIP1;E2F3;ST3GAL1;LYN;GOT1;TPRG1;STAT3;SLC16A10;DHCR24;TRERF1;DAP;DHRS7;BCL6;ID2;GALM;TACC1;EBAG9;LIMS1;LNX2
FOSL2 (E)	68/196	0.862209	0.96419	0.0158372	0.858195	0.127234	CYFIP1;TES;HEXB;TNFAIP3;ENO1;DUSP14;TUBA1C;TUBB6;ZSCAN31;CHEK2;TRIM25;MPV17;UPP1;JAK2;KLF10;GPR39;PARP4;GPX4;ITGA2;GTF3A;VEZF1;EMP3;SERPINB8;KLHL41;NME1;THOC6;TGFBR2;SLFN12;ELF1;NDUFS7;PSME4;CHI3L2;TAGLN2;DAGLB;VAMP5;PAFAH1B2;PSMD14;SLC20A1;TOR1AIP2;SGMS2;RTN4;RHOBTB2;TMEM245;RRAS;GNG5;KCTD20;TMEM205;CTNNA1;STAT6;FADD;STX3;IGFBP6;WASF2;CTNNAL1;ZKSCAN1;S100A10;TCEANC;DSTN;NR1D1;GPN1;AZIN1;AGBL5;AN…
TP53 (C)	111/319	0.907078	0.999995	1.99294e-06	0.861331	0.0840027	TMEM183A;CCP110;GCC2;NUCKS1;MSI2;FBXO22;EDC3;TUBB6;CAPNS1;RPS19;EPHB2;NUDT15;ATXN7L3;IER5;TRIM22;KPNA1;STARD4;SLC30A1;MED4;VOPP1;CDKL1;ZNF397;ANKRD17;DCUN1D3;AGAP1;SKA3;SMIM7;EFNA4;TPO;ZMAT3;BLOC1S2;PDGFC;MAP4;SAC3D1;ACBD6;SRD5A1;IRF2BP2;PUM1;FER;PHF14;MDM2;BTG2;DYRK3;TNFAIP8;BTG1;BNC2;PRKAG2;TRIAP1;WDR43;LMNB1;ALAD;LASP1;NUDCD2;GLIPR2;SGCB;ENC1;MYBL1;SVOP;RING1;APAF1;VPS13C;AEN;GLRX2;DDB2;IQCH;P…
MYOD1 (E)	54/166	0.945316	0.999995	1.99294e-06	0.778445	0.0437766	RYR1;DCLRE1C;HSPB1;DMP1;MTFR1L;TAZ;DUSP13;FAM110A;TUBA1B;ARL6IP5;ANXA6;KLF10;ACTN3;MUSK;PRMT1;CMBL;RUNDC3A;SCAMP2;CDC25B;RAP2B;TNNT1;SLC9A9;TMEM9;SMIM20;ASF1B;DNASE1L1;SDC4;SEMA3D;NOL9;ABRACL;PBXIP1;RHOBTB1;TTN;FXR1;PURB;BLOC1S1;E2F3;CCDC141;UBE2F;TRAPPC3;SLC37A2;PPP1R14B;PINLYP;DTNA;GOT1;LRBA;MYBPH;XRCC1;PCYOX1L;ASB5;ESYT1;LSM14A;NES;DNAL1
SMAD4 (C)	197/584	0.989648	0.999995	1.99294e-06	0.818861	0.00852072	TES;TRAF3IP2;ZDHHC7;ABCA12;F11R;MYB;PIP4K2B;EPC2;AGFG2;TP63;PDHX;MBNL1;SACM1L;WDR75;UNC5D;TWSG1;DAAM1;HECW2;AKIP1;VDAC2;VDAC1;SKAP1;SH2D2A;SDC3;MRPL14;MRPL15;OAZ2;BLOC1S6;ZNF148;S100A10;MSR1;NDFIP1;DTNB;TIPARP;LRBA;SUCO;MICAL2;UCK2;SFXN1;CALM2;CPEB4;SLC44A5;PTPRU;ZNF131;BTG2;SLC35F5;SNX13;PTPRJ;CD3E;SH3RF1;AKAP11;NUF2;ENC1;TCP11L1;BBS9;LMCD1;CEP55;NCOA1;GPR39;SREBF1;MANBA;ANXA4;ANXA5;DUSP6;ANKFN1…
RAD21 (E)	442/1265	0.993897	0.999995	1.99294e-06	0.860802	0.00526922	ATF1;POP7;TSEN54;ALKBH8;RRP9;ELK4;PSMD9;ALKBH2;LSM11;PSMD3;DIP2B;VPS36;XYLB;DDX18;VPS18;DNAAF2;TYW3;REV1;FRS3;CPED1;EID2;RNF126;RUFY4;GPR160;ORAI1;RPL27;ALG10B;OPTN;ASF1B;MRPL17;ZNF25;CIAO1;C12ORF57;PPP3R1;CEP70;RRS1;NHEJ1;ABCA1;NAA50;TIPARP;FUCA1;NR2F2;ERLIN2;FAM136A;PAFAH2;MRPL30;MEX3B;AGO2;PSMG2;CEP85;PIGO;HIST2H2AB;MRPL38;WDR41;MRPL39;PIGV;HOXC10;HIST2H2AC;MYOM3;MED11;FAM102B;MED13;TCTN3;RARS…
TP63 (C)	475/1399	0.999702	0.999995	1.99294e-06	0.820502	0.000244477	PI4K2B;RNH1;CLEC10A;ADARB1;ENO1;FAM110A;ELK4;RABGEF1;NSDHL;PSMD7;MYB;FDXR;CDK5RAP1;CYP1B1;PKNOX1;WLS;IER3;PRKAB2;WSB1;ZNF281;HPCAL1;RFX2;PRKAB1;MTAP;FEZ1;PLBD1;PRKCQ;NHLRC2;MTMR1;HSPA4L;CDCA7;GATA4;GNS;C12ORF66;DEDD2;CHST15;SERPINH1;ST3GAL5;SSR1;PLEK2;NRBF2;CHST14;VTI1B;LHPP;ARL14EP;RPL41;JUP;TIPARP;RDX;VANGL1;EHD4;TADA2A;FASN;TOLLIP;GTF2IRD1;RPLP1;WDR41;TCF20;RCSD1;GPR132;CHAF1A;UBL3;AIFM1;ENSA;…
SUZ12 (C)	273/1684	0.999991	0.999995	1.99294e-06	0.287554	2.68425e-06	IKZF1;ADARB1;IKZF3;SLC4A4;UBASH3B;ZMIZ1;RASSF5;PROK2;CYP1B1;DPF3;CPNE2;BVES;IER5;WLS;IL15RA;PAQR4;KCNK13;CACNA2D3;HNF1B;UNC5D;CPED1;EID1;HECW2;HECW1;VOPP1;PLBD1;PRR15;PRKCQ;ZFPM2;EPHA3;HOXB6;TSHZ1;GATA4;TMTC1;ZC3HAV1;UBE2J1;STRIP2;PRKAR2A;CHST15;ARSI;HIVEP3;TSPAN2;STXBP6;CD14;ST3GAL1;ARSB;LYN;STAC;SIAH2;PBX3;NR2F2;SLC16A14;PARP12;REL;TMCC3;SPATS2L;CD24;FBXL7;RNF220;SLC44A5;GABRB2;PTPRU;RYR2;PRKAG…
REST (C)	401/1280	0.999991	0.999995	1.99294e-06	0.72353	6.41537e-06	JRK;MYT1L;UXS1;GHITM;FNBP1L;WDR92;ZMIZ1;ZXDC;PLCE1;CYP1B1;RPL38;RTTN;ROPN1L;CMKLR1;GABARAPL2;NUP210;NGDN;CACNA2D4;UNC5D;ARMC8;RUFY1;RBP7;DYNC1LI1;EID2;RNF125;TMEM126A;TMEM126B;ASTN1;MTMR3;MAPKAP1;MTMR9;AGAP1;CFP;GNS;CYB5R4;RHOT1;PRKAR2A;CEP70;PSMF1;CHKA;PBX3;NR2F2;NR1D1;MOV10;UCK2;AGO4;PSMG3;HNRNPD;OGDH;CDC42SE2;PIGS;ARF4;RPLP1;ARPC1A;LRRC6;ADM;GLT1D1;TMEM43;MED10;FGFBP3;TMC1;ZC3H10;NSUN2;ANXA4;N…
REST (E)	86/383	0.999993	0.999995	1.99294e-06	0.462403	3.06609e-06	DPP10;SNAP25;PTPRR;CMAS;TFRC;RNF13;CLEC10A;SCHIP1;C1ORF131;KIAA0895L;TSEN54;CHCHD4;MCEE;CALB1;TMEM43;DPYSL2;TMED2;HIST1H1E;EPC2;SEPHS1;HMGN2;JAK1;SLC39A3;GABARAPL2;KCNH4;TRIQK;SVOP;PAQR4;KCNH8;DAPK3;ANXA5;HBA2;CASD1;DYNLL2;RUNDC3A;GABRG2;GNPAT;DDX39B;RAB37;ATP6V1B2;TKT;HIST1H2BD;CNTNAP5;SF1;SLC25A13;OSER1;AGPAT5;GRIA2;HDAC3;ABCB6;DIABLO;ABHD2;DDX1;PRUNE2;FSTL4;FSTL5;CYB5R4;SNX1;GLRA3;PARD6A;MAPK7…
EZH2 (E)	76/338	0.999994	0.999995	1.99294e-06	0.463953	2.97785e-06	INTS12;GSK3B;CCDC124;IKZF3;SLC4A4;HDDC3;RNF157;BABAM1;CDC27;KIF5A;EMILIN2;SLC16A9;CA14;KCNH4;CXADR;MYBPC2;KIRREL2;NUP210;UBALD2;HBA1;GTF2F2;EML2;TTI2;FRMD3;RBP7;FRMD5;ALDH5A1;CD8A;CTDSP1;MAK;RRAGD;FRG1;DMC1;PGP;BLVRB;PRR11;MPND;MAPRE2;SHANK3;KPNB1;NLGN1;COX16;PCOLCE2;MRPS33;C15ORF40;PDS5B;SKA2;BLOC1S6;WRN;ORC1;NCR3LG1;CAMTA1;NCAM2;LRRC8B;S1PR5;DCAF11;TRPM6;KIAA0319;FANCI;PRPF38A;ANKRD27;UBE2I;DTN…
EZH2 (C)	26/237	0.999994	0.999995	1.99294e-06	0.196616	1.14662e-06	PTPRU;COLGALT2;NFIX;ELFN1;RHOBTB1;MYB;DPF3;SLC16A9;PITX1;GRID1;TESC;B3GAT2;KCNK13;ADAM11;HNF1B;TGFBR3;CAMK4;GNAS;CD24;PFDN4;MDGA2;FJX1;FGFR3;HOXB6;CD244;RNF220
SUZ12 (E)	6/105	0.999995	0.999995	1.99294e-06	0.0973397	4.46683e-07	CDKN2C;NCR3LG1;ITPKA;EYA4;RSPO2;LONRF3
