# Supplementary material for: Epigenetic Plasticity Drives Carcinogenesis and Multi-Therapy Resistance in Multiple Myeloma
Source: Research Square preprint supplement (doi:10.21203/rs.3.rs-6306816/v1), 2025-04-15
Supplement: Supplementary file 11 [file a0b998efb077d2ed070f7885.xlsx]

## Sheet: Sheet1
Sample_ID	Gender	Age	Race	Del_1p	Amp_dup_1q21	Del_13q	Del_17p	t(4;14)	t(11;14)	t(14;16)	Gain_1q21	Amp_1q21	Monosomy_1	Trisomy_1	Tetrassomy_1	Monosomy_17	Trisomy_17	Gain_1p	Del_1q21	Partial_Del_13q	Gain_13q	Partial_Gain_13q	Gain_17p	Partial_Del_17p	Partial_Gain_17p	Del_4p	Gain_4p	Del_11q	Gain_11q	Del_16q	Gain_16q	Del_14q	Gain_14q	Trissomy 7	Pentassomy 7	Trissomy 9	Tetrassomy 9	Trissomy 15	Tetrassomy 15
NDMM_1	Female	57.7878	African American	0	0	0	0	0	0	0	0	0	0	0	0	0	0	0	0	0	0	0	0	0	0	0	0	0	0	0.86	0	0	0.92	0.84	0	0.84	0	0	0.84
NDMM_2*	Male	64.9062	White	NA	NA	NA	NA	NA	NA	NA	NA	NA	NA	NA	NA	NA	NA	NA	NA	NA	NA	NA	NA	NA	NA	NA	NA	NA	NA	NA	NA	NA	NA	NA	NA	NA	NA	NA	NA
NDMM_3	Female	37.3306	White	0	0	0	0	0	0.74	0	0	0	0	0	0	0	0	0	0	0	0	0	0	0	0	0	0	0	0.74	0	0	0	0.69	0	0	0	0	0	0
NDMM_4	Female	72.2683	White	0.61	0	0.67	0	0	0	0	0	0	0	0	0	0	0	0	0	0	0	0	0	0	0	0	0	0	0	0.28	0	0.51	0.46	0	0	0	0	0	0
LRMM_1	Male	72.1889	White	0	0.82	0	0.94	0	0	0	0	0.82	0	0	0	0	0	0	0	0	0	0	0	0	0	0	0	0	0.87	0	0	0	0	0	0.75	0	0.75	0.75	0
LRMM_2	Male	53.3689	Other race	0	0	0.33	0	0	0	0	0	0	0	0	0	0	0	0.35	0	0	0	0	0.13	0	0	0	0.36	0	0.16	0	0.32	0	0.32	0	0	0	0	0	0
LRMM_3	Female	64.9938	African American	0	0.87	0.53	0.24	0	0.44	0	0.44	0.43	0	0	0.43	0	0	0	0	0	0	0	0	0	0	0	0.32	0	0.44	0	0.22	0	0.32	0	0	0	0	0	0
LRMM_4	Female	70.4093	White	0	0.92	0	0	0	0	0	0.92	0	0	0	0	0	0	0	0	0	0	0	0	0	0	0	0	0	0.77	0.8	0	0	0.05	0	0	0.73	0	0.73	0
*FISH not performed.
