# Supplementary material for: Epigenetic Plasticity Drives Carcinogenesis and Multi-Therapy Resistance in Multiple Myeloma
Source: Research Square preprint supplement (doi:10.21203/rs.3.rs-6306816/v1), 2025-04-15
Supplement: Supplementary file 12 [file a370420232f916cbcc941261.xlsx]

## Sheet: Sheet1
Supplementary Table 1. Demographics data for the patients enrolled on this study.
Characteristic	N = 890 patient samples
Age: median (range), in years	64 (30-92)
Gender	N (%)
Male	500 (56)
Female	390 (44)
Mayo 2018 staging (specimen level, SMM only)	N (%)
Total available staging data	56
Low Risk	15 (27)
Intermediate Risk	23 (41)
High Risk	18 (32)
ISS staging (specimen level; NDMM, ERMM and LRMM)	N (%)
Total available staging data	692
Stage I	269 (39)
Stage II	166 (24)
Stage III	118 (17)
Unavailable	139 (20)
R-ISS staging (specimen level; NDMM, ERMM and LRMM)	N (%)
Total available staging data	692
Stage I	115 (17)
Stage II	315 (46)
Stage III	63 (9)
Unavailable	199 (29)
Cytogenetic abnormalities (risk data)	N (%)
Total available risk data	807 (90)
High-riska	127 (14)
Intermediate-riskb	242 (27)
Standard-riskc	438 (49)
Unavailable	83 (10)
Cytogenetic abnormalities (molecular data)	N (%)
Total available molecular data	807 (90)
t(11;14)	151 (17)
t(4;14)	65 (7)
Amp(1q21)	296 (34)
Del(13q)	322 (37)
Del(17p)	111 (13)
Unavailable	83 (10)
Disease Status	N (%)
MGUS	76 (9)
SMM	67 (7)
NDMM	223 (25)
ERMM (1-3 lines of therapy)	330 (37)
LRMM (4+ lines of therapy)	194 (22)
NDMM (N=223): first regimen summary	N (%)
VRD	95 (43)
VCD	30 (14)
VD	28 (12)
RD	26 (12)
KRD	14 (6)
Othersd	30 (13)
NDMM-SCT	92 (41)
NDMM (N=223): maintenance summary	N (%)
Lenalidomide	42 (46)
No Maintenance	16 (18)
IMID-PI combinations	13 (15)
Others	15 (16)
Bortezomib	5 (5)
ERMM (N=330): previous therapies	N (%)
Dexamethasone	316 (96)
Bortezomib	276 (84)
Lenalidomide	270 (82)
Melphalan	147 (45)
Cyclophosphamide	131 (40)
Carfilzomib	65 (20)
Doxorubicin	46 (14)
Pomalidomide	42 (13)
Thalidomide	30 (9)
Daratumumab	17 (5)
Ixazomib	14 (4)
Elotuzumab	8 (2)
Selinexor	3 (1)
Panobinostat	1 (1)
LRMM (N=194): previous therapies	N (%)
Dexamethasone	192 (99)
Bortezomib	190 (98)
Lenalidomide	189 (98)
Melphalan	142 (73)
Cyclophosphamide	141 (73)
Carfilzomib	139 (72)
Pomalidomide	137 (71)
Doxorubicin	80 (41)
Daratumumab	70 (36)
Thalidomide	44 (23)
Ixazomib	27 (14)
Elotuzumab	22 (11)
Panobinostat	21 (11)
Selinexor	12 (6)
Isatuximab	1 (1)
Median number of regimens (range)	3 (0-14)
aHigh risk: Del(17p) or t(14;16) or t(14;20)
bIntermediate risk: t(4;14) or Amp1q21 (4 or more copies)
cStandard risk: all other abnomalities and normal panels
dOthers include NRD, R, RVDD, KCD, VCVAD, unavailable data, ROD, RPD, RDD
