# Supplementary material for: Epigenetic Plasticity Drives Carcinogenesis and Multi-Therapy Resistance in Multiple Myeloma
Source: Research Square preprint supplement (doi:10.21203/rs.3.rs-6306816/v1), 2025-04-15
Supplement: Supplementary file 13 [file a783565bf406c72aa8c09c36.xlsx]

## Sheet: Sheet1
GENE	Expression		KO_Effect		MM cell lines (n)	SE-regulated in all CUT&Tag samples
	Log2(TPM+1)	Err. Bar	Mean	SD
AANAT	0.454874	0.440575	-0.14632	0.139237	20	Yes
ADAMTSL4	1.02419	0.83568	-0.21504	0.155485	20	Yes
AK1	2.91827	1.42307	-0.18152	0.122361	20	Yes
AKR1D1	0.038383	0.063891	-0.01184	0.147619	20	Yes
ALKBH4	3.36429	0.578092	-0.09238	0.141629	20	Yes
ANKDD1A	3.53	0.924489	-0.04742	0.106358	20	Yes
ANXA6	6.34825	1.99477	-0.09586	0.164692	20	Yes
APOBEC3A	0.204887	0.247604	-0.03027	0.121788	20	Yes
APOBEC3B	5.13483	1.98355	-0.12594	0.175033	20	Yes
APOBEC3C	5.18879	0.81202	-0.03162	0.109143	20	Yes
APOBEC3D	2.32808	0.997414	-0.21648	0.129526	20	Yes
APOBEC3F	2.19726	0.991113	0.072284	0.104642	20	Yes
APOBEC3G	3.41048	1.89554	-0.16209	0.103831	20	Yes
ARAP1	5.27624	0.693112	-0.06495	0.126974	20	Yes
ARF1	8.64515	0.7081	-0.49618	0.246977	20	Yes
ARF6	5.17266	0.530734	-0.4557	0.220071	20	Yes
ASCC1	4.48827	0.549322	-0.17834	0.13898	20	Yes
ASPRV1	0.607013	0.393518	-0.09439	0.160271	20	Yes
ATG16L2	4.23588	0.708195	-0.23872	0.17287	20	Yes
ATP6AP1	6.75083	0.698369	-1.72496	0.221993	17	Yes
ATP6V1E2	3.21337	0.805156	-0.06929	0.115822	20	Yes
BAD	5.37411	0.524935	-0.06103	0.141099	20	Yes
BCL2L1	5.07154	1.42334	-0.80948	0.47486	20	Yes
BMF	4.5025	1.34138	-0.2224	0.180472	20	Yes
BTG2	7.15651	1.04771	-0.03724	0.152683	20	Yes
BUB1B	5.56827	0.761405	-1.35921	0.195085	20	Yes
C10orf105	0.019466	0.040815	-0.1308	0.108769	20	Yes
C1orf35	4.37777	0.807311	0.010654	0.130055	20	Yes
C1QTNF6	2.0096	1.38742	-0.16895	0.11132	20	Yes
CASP10	4.24422	0.80158	-0.1529	0.184788	20	Yes
CCDC117	4.31065	0.70141	-0.20899	0.151629	20	Yes
CCDC69	4.72112	1.58955	-0.03431	0.120323	20	Yes
CCDC88B	4.44849	1.44067	-0.18622	0.118527	20	Yes
CCDC88C	5.14122	0.696819	-0.06509	0.137943	20	Yes
CCNE2	3.53431	1.44838	-0.06149	0.283442	20	Yes
CD300LF	0.145406	0.387382	-0.02399	0.133454	20	Yes
CD48	7.23689	2.118	-0.14664	0.137012	20	Yes
CDK9	5.34885	0.590469	-1.37592	0.146259	20	Yes
CFLAR	6.35768	0.78077	-1.25295	0.418186	20	Yes
CHD2	5.56836	0.588469	0.006669	0.112461	20	Yes
CHEK2	4.45979	0.906511	0.082864	0.146633	20	Yes
CHIT1	1.15588	1.05874	-0.17604	0.096229	20	Yes
CHST15	4.02627	1.69958	0.034668	0.148732	20	Yes
CIC	4.67768	0.677126	-0.04435	0.224929	20	Yes
COL8A2	0.03929	0.058586	-0.19101	0.149589	20	Yes
CPLX3	0.298715	0.475839	0.103276	0.106207	20	Yes
CREB3L2	4.92082	0.928401	0.103634	0.115896	20	Yes
CRIPT	3.42851	0.436815	-0.2592	0.157592	20	Yes
CSK	6.22191	0.863328	-0.09718	0.216843	20	Yes
CXXC5	4.62912	1.08006	0.084705	0.094791	20	Yes
CYP1A1	0.481342	0.468977	0.02011	0.104744	20	Yes
CYTH1	5.88074	0.653257	-0.08316	0.152381	20	Yes
CYTH4	1.51944	1.43384	-0.1163	0.112027	20	Yes
DDIT4	6.90368	1.60861	-0.0036	0.281912	20	Yes
DEDD2	4.44335	0.50592	0.127617	0.17383	20	Yes
DNAJB12	4.05192	0.810253	-0.30745	0.109377	20	Yes
DNAJC4	5.05697	0.759231	0.052073	0.108381	20	Yes
DNASE1L1	4.0462	1.08147	0.178883	0.120473	17	Yes
DPM2	6.02883	0.555376	-1.01839	0.372737	20	Yes
DUSP22	6.8172	0.793929	-0.52465	0.187678	20	Yes
DUX4	0.056082	0.072918	-1.67471	0.305308	20	Yes
EAPP	4.56448	0.639067	-0.51742	0.14844	20	Yes
EHBP1L1	5.55039	0.858601	-0.21736	0.163945	20	Yes
ELL2	5.92936	1.21471	-0.10453	0.220786	20	Yes
EMD	6.15611	0.608264	-0.04761	0.139183	17	Yes
ENDOU	0.343603	0.467539	0.079897	0.129147	20	Yes
ENG	1.38702	0.555901	-0.01972	0.129891	20	Yes
EPHX2	3.31169	1.08494	0.035237	0.112174	20	Yes
ERF	4.33433	0.651093	0.093627	0.141146	20	Yes
ERN1	6.28633	1.23218	-0.19317	0.265509	20	Yes
ESRRA	5.0788	0.483529	-0.27593	0.12875	20	Yes
FAM126B	3.04974	0.637049	-0.0529	0.065954	20	Yes
FAM174B	2.97321	1.56079	0.066795	0.138435	20	Yes
FAM50A	6.30335	0.78714	-0.87987	0.397906	17	Yes
FAM89B	4.47495	0.964599	-0.27779	0.119904	20	Yes
FBXW7	4.44801	0.694229	0.052368	0.112567	20	Yes
FERMT3	5.18455	2.01048	-0.09679	0.124332	20	Yes
FKBP2	6.88375	0.654762	0.012844	0.131212	20	Yes
FLI1	4.70435	0.829165	-0.22406	0.342592	20	Yes
FLNA	7.65315	1.10458	0.157298	0.087297	17	Yes
FNDC3B	4.96747	0.835552	0.057775	0.169498	20	Yes
FPGS	5.16611	0.736925	-0.69168	0.191939	20	Yes
FRG2B	0.088258	0.242734	-0.07407	0.128715	20	Yes
GDI1	6.42784	0.723668	0.131931	0.145514	17	Yes
GJC2	0.158337	0.086247	-0.09809	0.130984	20	Yes
GLRX	6.52674	0.662499	0.236482	0.126317	20	Yes
GM2A	4.02212	0.811467	0.029141	0.178709	20	Yes
GNG7	3.52907	1.50076	0.07722	0.107672	20	Yes
GPR137	4.83881	0.616183	-0.37738	0.1791	20	Yes
GPR68	0.871907	0.5426	-0.23465	0.096147	20	Yes
GRINA	6.72611	0.811379	-0.29489	0.148681	20	Yes
GSK3A	5.23142	0.613197	0.133744	0.251698	20	Yes
GUK1	7.6948	0.573666	-1.50983	0.206358	20	Yes
GYPC	5.45809	2.16272	-0.04195	0.150003	20	Yes
HDAC7	5.31828	1.33791	-0.08222	0.243498	20	Yes
HSCB	4.07691	0.751929	-0.65694	0.174403	20	Yes
HSD17B4	5.71344	0.495082	-0.21347	0.13077	20	Yes
IBA57	2.0442	0.715414	-0.34431	0.239481	20	Yes
ICAM2	5.73762	0.630865	0.05217	0.129886	20	Yes
IKZF1	4.42651	1.11779	-0.25138	0.259582	20	Yes
IL2RB	0.871007	1.33039	-0.01848	0.14189	20	Yes
INPP4A	5.41829	0.908253	-0.11052	0.160153	20	Yes
IRF1	5.05718	1.07666	-0.24931	0.191629	20	Yes
IRF4	7.65111	0.686408	-1.57029	0.485655	20	Yes
KCNK4	0.045757	0.055238	-0.36748	0.17212	20	Yes
KCNK7	0.638068	0.297642	-0.14086	0.136441	20	Yes
KLF2	3.96002	1.40317	0.019672	0.281013	20	Yes
KLHL6	3.44611	2.08934	-0.05668	0.209443	20	Yes
LMAN1L	0.210184	0.346815	0.011767	0.109339	20	Yes
LMF2	5.02578	0.617596	0.000261	0.091456	20	Yes
LRWD1	4.75812	1.12477	-0.38788	0.19304	20	Yes
LTBP3	3.7657	0.961976	-0.40683	0.086839	20	Yes
LY9	3.4636	2.14907	-0.07856	0.118322	20	Yes
MACROD1	4.18152	1.0643	-0.15627	0.141026	20	Yes
MAP7D1	5.29131	0.701174	-0.10567	0.182279	20	Yes
MCL1	7.53911	1.03141	-0.9924	0.412691	20	Yes
MEF2D	5.49903	0.735556	-0.2199	0.233446	20	Yes
MEGF8	2.92294	0.770895	-0.05406	0.110899	20	Yes
MRPL55	5.75437	0.723983	-0.6718	0.201733	20	Yes
MRPS28	5.42767	0.687041	-0.53709	0.173394	20	Yes
MZB1	9.05957	1.87003	-0.16048	0.163798	20	Yes
NAT9	5.33625	0.308564	-0.07198	0.132483	20	Yes
NEMF	4.60749	0.469812	-0.3967	0.171462	20	Yes
NUAK2	2.06776	1.12258	-0.14381	0.1445	20	Yes
NUDT22	5.25432	0.511939	-0.24366	0.119022	20	Yes
ODF3B	2.03763	1.02567	-0.00768	0.151025	20	Yes
ORAI2	6.27311	0.990422	-0.02792	0.122354	20	Yes
PCBP1	8.18174	0.419586	-1.27185	0.252543	20	Yes
PCNX3	4.6604	0.537166	-0.32878	0.176338	20	Yes
PIF1	4.6963	0.822368	-0.13034	0.17044	20	Yes
PIP5KL1	2.94613	1.66508	-0.03594	0.085729	20	Yes
PLCB3	2.24018	0.637002	-0.21394	0.205917	20	Yes
PLEC	4.06454	0.995734	-0.18129	0.179939	20	Yes
PLEKHO2	3.39174	0.571622	0.037369	0.118069	20	Yes
PLXNA3	2.8176	1.4644	0.109883	0.077238	17	Yes
PNMA1	3.30758	1.3265	-0.05883	0.144968	20	Yes
POLR2J	6.71328	0.619053	-2.06522	0.338152	20	Yes
PPP1R14B	7.30434	0.644447	-0.41936	0.113214	20	Yes
PRCD	0.602746	0.461061	-0.08239	0.132108	20	Yes
PRDX5	8.31716	0.660673	-0.28188	0.132604	20	Yes
PRKCD	3.98177	0.939649	-0.12436	0.18976	20	Yes
PRKRIP1	5.04205	0.59617	-0.67947	0.166114	20	Yes
PROB1	2.72443	0.592339	-0.09887	0.165533	20	Yes
PRR19	0.352808	0.187202	-0.02436	0.10631	20	Yes
PSD2	0.058839	0.038514	0.164041	0.089666	20	Yes
PTK2B	5.87775	1.6227	0.166341	0.121244	20	Yes
PTMA	10.8058	0.573178	-0.65059	0.216098	20	Yes
PTRH1	3.65574	0.807452	-0.13063	0.104865	20	Yes
RAC2	6.99742	0.932909	-0.14995	0.20096	20	Yes
RAD50	4.16141	0.634517	-0.14666	0.118827	20	Yes
RAPGEF3	1.23377	0.650653	0.133018	0.12032	20	Yes
RASA2	3.26409	0.892772	0.030434	0.458993	20	Yes
RBPMS2	0.314767	0.551083	0.105771	0.130762	20	Yes
RFT1	5.01743	0.455685	-1.04986	0.166167	20	Yes
RHBDF2	5.05791	1.03819	-0.19164	0.130077	20	Yes
RHOQ	5.11687	1.03343	-0.58225	0.155234	20	Yes
RPAP3	4.40189	0.578957	-0.71613	0.153407	20	Yes
RPL10	12.0611	0.529475	-1.39959	0.229254	17	Yes
RPS6KA4	3.69491	0.482969	0.037659	0.165652	20	Yes
RTP1	0.018491	0.04874	-0.11139	0.123712	20	Yes
SBF1	5.30765	0.602413	0.20037	0.142358	20	Yes
SCO2	4.3937	0.76327	-0.17789	0.202672	20	Yes
SELPLG	6.66349	1.76246	-0.10652	0.110228	20	Yes
SH2D3C	3.98866	0.794084	-0.02813	0.128134	20	Yes
SIPA1	3.39489	0.870387	-0.19475	0.175103	20	Yes
SLAMF1	0.417366	1.25586	-0.18121	0.145784	20	Yes
SLAMF7	6.35827	2.25507	-0.16117	0.127347	20	Yes
SLC23A1	2.55973	1.21549	0.096861	0.135211	20	Yes
SLC48A1	3.69293	0.882621	0.028279	0.126926	20	Yes
SLC9A3R1	6.90975	0.925128	-0.11697	0.127717	20	Yes
SPATA24	3.85333	0.486824	-0.14693	0.128205	20	Yes
SPATC1	0.082128	0.15324	0.079886	0.14172	20	Yes
SRP14	7.8575	0.436485	-1.38281	0.363771	20	Yes
SSTR3	1.75352	2.38948	-0.07701	0.10135	20	Yes
ST6GALNAC4	5.82641	1.11048	-0.24596	0.127273	20	Yes
ST6GALNAC6	3.09465	0.850632	-0.1121	0.112682	20	Yes
STARD10	3.67683	1.13077	0.001745	0.13862	20	Yes
STIP1	7.2903	0.555043	-0.31809	0.17251	20	Yes
STMN4	0.126202	0.215534	-0.01899	0.111788	20	Yes
TENT5C	5.52713	1.74969	0.432005	0.352251	20	Yes
TEX28	0.010169	0.041153	0.481972	0.145123	17	Yes
THRAP3	5.7684	0.599062	-0.17095	0.19019	20	Yes
TMEM104	3.1333	0.48313	-0.23093	0.129194	20	Yes
TMEM119	0.46804	0.648152	-0.16307	0.142451	20	Yes
TMEM145	0.509925	0.551967	0.060453	0.163579	20	Yes
TNFAIP8	5.85806	0.952263	-0.0423	0.167611	20	Yes
TNIP1	5.97931	0.747267	-0.05936	0.123894	20	Yes
TOR2A	4.2752	0.637812	-0.54982	0.156802	20	Yes
TP53INP1	5.32386	1.50543	-0.01819	0.12907	20	Yes
TPX2	5.96845	0.942214	-1.27726	0.271033	20	Yes
TRAPPC3	5.84961	0.446158	-1.33651	0.136948	20	Yes
TRIM35	3.25433	0.974178	0.125695	0.156238	20	Yes
TRMT112	8.09398	0.508761	-1.89527	0.252998	20	Yes
TRPT1	4.85508	0.542309	0.052778	0.116975	20	Yes
TYMP	2.54953	1.15175	-0.06746	0.106207	20	Yes
UBE2O	4.55779	0.586686	-0.29067	0.158817	20	Yes
VEGFB	5.48336	0.503788	-0.07442	0.13179	20	Yes
VOPP1	7.10311	0.927373	-0.31708	0.168241	20	Yes
VPS37B	5.00701	1.53953	-0.30635	0.164342	20	Yes
VSIR	2.18231	1.53967	0.074506	0.113009	20	Yes
XBP1	8.5843	1.08105	-0.39955	0.353582	20	Yes
ZNRF3	1.74298	0.810119	-0.02105	0.101641	20	Yes
CATSPERZ	NA	NA	NA	NA	NA	Yes
EPPK1	NA	NA	NA	NA	NA	Yes
KLHDC7B	NA	NA	NA	NA	NA	Yes
LOC105370624	NA	NA	NA	NA	NA	Yes
LOC107986153	NA	NA	NA	NA	NA	Yes
LOC114841035	NA	NA	NA	NA	NA	Yes
MIDEAS	NA	NA	NA	NA	NA	Yes
NPIPB3	NA	NA	NA	NA	NA	Yes
SPDYE6	NA	NA	NA	NA	NA	Yes
TAFAZZIN	NA	NA	NA	NA	NA	Yes
ZNRD2	NA	NA	NA	NA	NA	Yes
STN1	3.56983	0.653751	-0.639833	0.200535	20	No
ATXN7	3.08702	0.532269	-0.146878	0.312398	20	No
ATXN3	3.7889	0.762691	-0.0665767	0.118559	20	No
ATXN2	4.75867	0.56731	-0.141461	0.233458	20	No
ATXN1	3.53928	0.811908	-0.00708698	0.202715	20	No
STAMBP	5.15147	0.484616	-0.408287	0.249559	20	No
PKD2	2.89498	0.994099	0.197017	0.12866	20	No
PKD1	5.37398	0.594721	-0.284173	0.198854	20	No
KRTAP9-9	0.00282918	0.0123321	-0.143509	0.108037	20	No
KRTAP9-8	0.00782511	0.0158858	-0.333626	0.134245	20	No
KRTAP9-7	0	0	0.102197	0.161927	20	No
KRTAP9-6	0	0	-0.0936949	0.117292	20	No
KRTAP9-4	0	0	-0.302543	0.1133	20	No
KRTAP9-3	0.00494792	0.0162499	0.0792573	0.16972	20	No
KRTAP9-2	0	0	-0.299038	0.170592	20	No
KRTAP9-1	0.00752798	0.0328137	0.146169	0.143094	20	No
LIX1L	3.70074	1.18941	-0.255251	0.178889	20	No
AOX1	0.149515	0.108921	0.112591	0.0605588	20	No
NDUFV3	4.79985	0.403212	-0.0601398	0.126208	20	No
NDUFV2	7.83767	0.941974	-0.312856	0.246332	20	No
NDUFV1	7.77958	0.439407	-0.266578	0.222161	20	No
STK4	5.23199	0.577221	0.0617633	0.124734	20	No
STK3	2.99798	0.783806	-0.210714	0.106539	20	No
HPSE2	0.303229	0.720744	-0.156349	0.121595	20	No
SRXN1	4.50255	0.634802	-0.265949	0.171645	20	No
BIRC8	0	0	-0.172064	0.166928	20	No
BIRC7	0.103655	0.192001	0.162685	0.108123	20	No
BIRC6	4.71322	0.481762	-0.276211	0.365623	20	No
BIRC5	5.77025	0.831452	-1.67127	0.202409	20	No
BIRC3	4.2555	2.3353	0.0443421	0.249337	20	No
MAVS	3.90769	0.582109	0.211553	0.146607	20	No
BIRC2	4.19636	1.41765	-0.0157146	0.407778	20	No
STIL	3.32024	0.87359	-0.895044	0.381566	20	No
SLC29A4	0.215489	0.395936	-0.22772	0.0942056	20	No
TIGIT	0.883497	0.885287	-0.109715	0.0963069	20	No
SLC29A3	2.0103	0.572796	-0.102482	0.121232	20	No
SLC29A2	1.94871	1.93479	-0.242263	0.132218	20	No
SLC29A1	6.33994	0.824513	-0.0541944	0.122605	20	No
TACSTD2	0.265842	0.162719	-0.0749671	0.192718	20	No
CDYL	4.93158	0.735404	-0.430609	0.206674	20	No
NDUFS8	6.81218	0.496655	-0.45527	0.234221	20	No
NDUFS7	7.36299	0.495107	-0.269091	0.154849	20	No
C10orf120	0	0	0.10783	0.140471	20	No
NDUFS6	6.51448	0.540709	-0.117329	0.149813	20	No
NDUFS5	8.5541	0.659016	-0.863288	0.22998	20	No
NDUFS4	5.9304	0.428069	-0.158202	0.121285	20	No
NDUFS3	6.51173	0.682527	-0.50526	0.182573	20	No
NDUFS2	7.2472	0.605884	-0.543196	0.207421	20	No
NDUFS1	5.83073	0.589454	-0.514079	0.261487	20	No
ZZEF1	3.65729	0.643218	-0.0943879	0.131549	20	No
PAFAH1B3	4.75068	1.04851	-0.145191	0.199569	20	No
MAU2	4.66348	0.479556	-0.929277	0.259212	20	No
PAFAH1B2	4.29898	0.412051	-0.0978866	0.125582	20	No
PAFAH1B1	5.5529	0.630209	-1.89954	0.171423	20	No
MATK	0.379804	0.979732	-0.363683	0.123973	20	No
STMP1	4.53341	0.527052	0.14407	0.152042	20	No
CXXC5	4.62912	1.08006	0.0847048	0.0947909	20	No
CXXC4	2.71021	1.13428	-0.0768358	0.142379	20	No
CXXC1	6.95579	0.520824	-0.442366	0.207237	20	No
LHCGR	0.000717765	0.00312866	0.0167805	0.0938599	20	No
SERF2	9.54965	0.409281	-0.36434	0.186697	20	No
C10orf113	0	0	0.222972	0.0844449	20	No
UPF3B	4.26955	0.698616	-0.15161	0.272605	17	No
MOB3C	2.308	0.498287	-0.130036	0.147727	20	No
UPF3A	5.84248	0.572138	-0.523476	0.114225	20	No
MOB3B	0.540032	0.688838	0.123988	0.125759	20	No
CDX4	0.0057069	0.0122589	-0.205638	0.0650399	17	No
MOB3A	5.16583	1.12019	-0.0617561	0.115969	20	No
CDX2	0.0274434	0.034578	-0.143832	0.140146	20	No
CDX1	0.00993679	0.0190649	0.111881	0.104974	20	No
PAGR1	4.84475	0.764516	-0.594178	0.422375	20	No
C10orf105	0.0194664	0.0408148	-0.1308	0.108769	20	No
MARS	8.16332	0.546341	-1.24254	0.204477	20	No
KDELR3	1.87151	1.4436	-0.0850905	0.18483	20	No
KDELR2	5.57804	0.650338	0.0468957	0.0933167	20	No
KDELR1	7.01689	0.922352	-0.258426	0.190131	20	No
MAS1	0.00214622	0.00681962	0.0186658	0.125811	20	No
STMN4	0.126202	0.215534	-0.0189937	0.111788	20	No
STMN3	1.85978	1.45914	-0.144654	0.118709	20	No
STMN2	0.0486404	0.0290909	-0.0529977	0.143137	20	No
STMN1	8.33025	0.880241	-0.204558	0.256192	20	No
DSCAML1	0.00856422	0.0137612	-0.0799298	0.165932	20	No
MOB1B	2.59786	1.14805	0.187213	0.133577	20	No
MOB1A	5.52692	0.509303	-0.00642965	0.117334	20	No
CDV3	7.81251	0.815341	-0.262706	0.129712	20	No
TRARG1	0.00143553	0.00430659	0.0258728	0.136926	20	No
MOAP1	4.06827	0.572226	0.0526558	0.129906	20	No
HCCS	5.01533	0.603691	-0.106678	0.16076	17	No
KLLN	1.20029	0.625745	-0.141654	0.0976447	20	No
MAPT	1.20854	1.05458	-0.124546	0.121979	20	No
TIGD7	2.14146	1.05044	-0.0416979	0.15664	20	No
TIGD6	2.13873	0.426821	-0.0547371	0.118084	20	No
TIGD5	1.82044	0.561203	-0.158708	0.170977	20	No
TIGD4	0.690809	0.440406	-0.104111	0.128129	20	No
TIGD3	0.941915	0.442079	-0.0909687	0.0889608	20	No
TIGD2	2.84082	0.619571	0.0225841	0.118106	20	No
LCE6A	0	0	-0.172338	0.149972	20	No
SF3B6	7.19287	0.527454	-0.81218	0.172722	20	No
TIGD1	2.45869	0.752197	-0.501748	0.150859	20	No
SF3B5	7.33432	0.765383	-1.84929	0.248523	20	No
SF3B4	6.2188	0.80974	-1.7565	0.224136	20	No
SF3B3	6.39145	0.83371	-1.74988	0.214942	20	No
SF3B2	7.82062	0.557094	-1.23742	0.243584	20	No
SF3B1	6.81514	0.430596	-1.49706	0.2203	20	No
TSPOAP1	2.17132	1.00287	-0.177112	0.152004	20	No
MAP9	1.52715	1.03753	0.124691	0.112956	20	No
MAP7	1.49039	1.16152	-0.164989	0.137982	20	No
MAP6	0.0364804	0.0732223	-0.0972901	0.152996	20	No
CDT1	5.07789	0.581343	-1.47811	0.388395	20	No
MAP4	5.90902	0.556261	-0.0915881	0.12377	20	No
CDSN	0.0492086	0.204679	-0.129426	0.114606	20	No
MAP2	0.962321	1.21544	0.00557571	0.101736	20	No
STC2	4.02622	2.29356	0.106441	0.105255	20	No
STC1	0.0828291	0.0591296	0.188072	0.110067	20	No
KLK9	0	0	-0.183499	0.128238	20	No
EDA2R	1.18197	1.05352	0.126273	0.127225	17	No
KLK8	0.0558157	0.0644268	-0.0655549	0.127531	20	No
KLK7	0.0241251	0.0236538	0.230617	0.12257	20	No
KLK6	0.221786	0.155528	-0.0634198	0.0689929	20	No
KLK5	0.0961543	0.0777367	-0.156249	0.134772	20	No
KLK4	0.0099508	0.0179827	-0.0719647	0.0981582	20	No
LCE5A	0.0122139	0.044436	-0.116341	0.157358	20	No
KLK3	0.129321	0.282141	0.0363025	0.090059	20	No
KLK2	0.710582	0.794515	0.0515716	0.115791	20	No
MAOB	0.0285215	0.0459977	-0.0138254	0.0977804	17	No
KLK1	1.16634	1.56415	-0.0545463	0.125935	20	No
MAOA	0.285084	0.470517	-0.0514539	0.150096	17	No
SF3A3	6.08562	0.558559	-1.30937	0.20999	20	No
SF3A2	6.40264	0.428222	-1.39396	0.168684	20	No
SF3A1	5.50597	0.620784	-2.01307	0.212945	20	No
PKMYT1	5.58859	1.0585	-1.06519	0.25475	20	No
ANXA2R	2.02194	0.792485	-0.0893841	0.127005	20	No
CDS2	3.61693	0.629973	-0.121092	0.214653	20	No
CDS1	0.98221	0.85085	-0.062038	0.0884938	20	No
STAR	0.130437	0.16486	0.0204634	0.179662	20	No
TYW1B	1.93088	0.725534	-0.377003	0.163325	20	No
ALPK3	0.342372	0.342512	0.125064	0.151583	20	No
ALPK2	1.90056	2.0507	0.0600015	0.144618	20	No
STAM	3.14095	0.677661	0.181913	0.175645	20	No
ALPK1	2.11245	0.925052	0.0417287	0.0800099	20	No
MANF	7.74035	0.623702	-1.06765	0.395285	20	No
TIGAR	2.5139	0.72176	-0.00371953	0.136914	20	No
LCE4A	0.00351947	0.015341	-0.0871849	0.137099	20	No
STAC	0.249695	0.34825	0.139897	0.167797	20	No
NUS1	4.6407	0.502263	-1.43922	0.202881	20	No
CDR2	4.74905	0.574717	-0.203405	0.135206	20	No
CDR1	0.0378042	0.0870889	0.200384	0.0772895	17	No
SYCE1L	0.940371	0.531877	-0.0461109	0.16069	20	No
PJVK	1.27976	0.533672	0.0439228	0.103441	20	No
LCE3E	0.00351947	0.015341	-0.119195	0.141791	20	No
LCE3D	0	0	-0.0775442	0.149379	20	No
LCE3C	0	0	-0.0813938	0.172499	20	No
LCE3B	0	0	0.255488	0.196979	20	No
LCE3A	0	0	-0.453525	0.288928	20	No
XRN2	5.25248	0.529003	-1.30761	0.128655	20	No
XRN1	3.81959	0.670189	-0.885885	0.314898	20	No
MARCKSL1	4.62053	1.63439	-0.127425	0.130692	20	No
MPV17	6.06723	0.387988	-0.160764	0.169191	20	No
ANXA13	0.0411338	0.0777127	-0.0434713	0.154496	20	No
SERPINB13	0.0224463	0.035869	-0.00474741	0.142846	20	No
ANXA11	5.54445	1.35546	-0.188696	0.100354	20	No
SERPINB12	0.0148103	0.0271909	0.110012	0.120973	20	No
ANXA10	0.0232723	0.0310864	0.039954	0.143663	20	No
LMAN2	7.77163	0.631387	-0.290391	0.171745	20	No
SERPINB10	0.282928	0.796528	-0.0154427	0.13678	20	No
LMAN1	6.72213	0.610729	0.251497	0.161477	20	No
MALL	0.12976	0.0721226	0.0258685	0.0989411	20	No
LCE2D	0	0	0.085154	0.223547	20	No
LCE2C	0.00282918	0.0123321	-0.184777	0.162239	20	No
LCE2B	0	0	0.128091	0.162627	20	No
LCE2A	0	0	-0.357737	0.131858	20	No
POTEB2	0.102656	0.447465	0.357896	0.166997	20	No
GPHA2	0.0197319	0.0536902	-0.127299	0.112394	20	No
CLTCL1	0.922179	0.759365	-0.0917726	0.12537	20	No
POMGNT2	2.58486	1.0793	-0.0665337	0.11381	20	No
POMGNT1	4.21254	0.522937	-0.122995	0.124079	20	No
RHPN2	2.30893	1.04992	-0.13169	0.133028	20	No
RHPN1	2.90814	1.94438	-0.419375	0.200177	20	No
EP300	4.77987	0.606094	-1.07486	0.408143	20	No
CDON	2.38543	1.30742	-0.0318478	0.133807	20	No
NOLC1	6.91009	0.663417	-0.492722	0.227142	20	No
HCLS1	7.03955	1.65898	-0.127787	0.14312	20	No
LCE1F	0.0200269	0.0872952	0.176966	0.148879	20	No
LCE1E	0.100462	0.324992	-0.511999	0.132044	20	No
CREG2	0.0207576	0.0450758	-0.00773396	0.137133	20	No
LCE1D	0	0	0.0184623	0.132282	20	No
CREG1	6.11905	1.60929	-0.13981	0.139837	20	No
LCE1C	0.0325382	0.141831	-0.573544	0.129171	20	No
LCE1B	0.0353674	0.141718	-0.238945	0.126011	20	No
LCE1A	0	0	0.107847	0.13205	20	No
CDO1	0.0405075	0.0457619	0.0673549	0.104902	20	No
COL19A1	0.40994	0.802633	0.118406	0.0797845	20	No
CDNF	1.90419	1.01714	0.023095	0.169926	20	No
KLF9	2.88489	0.997312	-0.0293959	0.12352	20	No
KLF8	1.39416	1.15801	-0.0864922	0.10696	17	No
KLF7	1.72512	1.07681	-0.475832	0.138814	20	No
TPSAB1	0.046287	0.0595403	-0.0819065	0.191213	20	No
KLF6	5.21983	1.22476	0.0924463	0.147464	20	No
SPRED3	1.07544	0.957763	-0.077389	0.122587	20	No
KLF5	1.54369	0.731165	-0.089504	0.174465	20	No
SPRED2	3.17414	1.31973	0.228233	0.154437	20	No
KLF4	0.788728	1.05563	0.0845475	0.0895762	20	No
SPRED1	2.40598	1.05359	0.242869	0.139017	20	No
KLF3	2.90669	1.60568	0.121065	0.169131	20	No
KLF2	3.96002	1.40317	0.0196724	0.281013	20	No
KLF1	0.22539	0.166032	-0.220532	0.105718	20	No
PKDCC	1.62387	1.52414	-0.021708	0.178097	20	No
TMEM179B	5.26956	0.530413	-0.00916643	0.123221	20	No
NUMB	4.46142	0.812792	-0.134454	0.143305	20	No
SPATS2	5.52845	0.809745	0.249761	0.104144	20	No
SPATS1	0	0	-0.18144	0.12936	20	No
ATP5MPL	7.3277	0.508666	0.121169	0.136696	20	No
GALR3	0.0298564	0.0485446	0.0806658	0.166097	20	No
H2BFWT	0.0151648	0.0416213	-0.158449	0.182051	17	No
GALR2	0.401864	0.441146	0.0435496	0.12151	20	No
GALR1	0.00142846	0.0062265	0.07114	0.116585	20	No
TMEM178B	1.0358	1.22627	-0.0908485	0.196331	20	No
TMEM178A	0.499077	0.656952	-0.0780999	0.158593	20	No
HPRT1	5.86938	0.784598	-0.0129363	0.216321	17	No
KLC4	3.82073	0.585723	-0.126772	0.153416	20	No
KLC3	0.289184	0.357078	-0.115554	0.167854	20	No
KLC2	4.48229	0.56488	-0.785846	0.200425	20	No
KLC1	5.63452	0.596813	0.109676	0.0868678	20	No
CDK9	5.34885	0.590469	-1.37592	0.146259	20	No
GPCPD1	2.70363	0.610896	-0.00932005	0.186417	20	No
CDK8	3.34355	0.547083	-0.36711	0.317378	20	No
CDK7	4.77074	0.614198	-1.9905	0.232612	20	No
CDK6	4.9337	1.12913	-0.976971	0.439206	20	No
CDK5	4.19432	0.653296	0.00225094	0.163892	20	No
CDK4	7.34146	0.584023	-0.391884	0.284755	20	No
CDK3	2.26542	0.642663	-0.177591	0.129286	20	No
CDK2	5.49016	0.807289	-0.866036	0.290838	20	No
PLSCR5	0	0	-0.00211522	0.131597	20	No
CDK1	5.79062	0.860391	-1.82803	0.18152	20	No
PLSCR4	0.200808	0.245076	0.14683	0.110735	20	No
PLSCR3	3.7831	1.09237	0.119899	0.096091	20	No
PAGE5	3.88985	3.85156	0.0702469	0.0885659	17	No
PLSCR2	0.0303034	0.0555644	-0.0544941	0.151733	20	No
KRTCAP3	1.59445	1.28414	-0.0190399	0.164552	20	No
PAGE4	0.959681	1.54265	0.0603401	0.0831808	17	No
PLSCR1	4.04334	1.56707	0.143246	0.0822036	20	No
KRTCAP2	8.58583	0.758794	-0.409777	0.136686	20	No
PAGE2	0.907526	1.97861	-0.0266584	0.109154	17	No
PAGE1	1.32879	2.35227	0.119987	0.0862209	17	No
MAFK	3.51217	0.635378	-0.178733	0.157233	20	No
CREB5	1.30906	1.31554	0.27872	0.0899289	20	No
CREB3	4.81286	0.592203	-0.184333	0.10612	20	No
MAFG	4.59962	0.783566	-0.195571	0.200214	20	No
MAFF	2.51943	0.986425	-0.267658	0.130172	20	No
CREB1	4.54869	0.538175	-0.223794	0.188976	20	No
OTUD5	6.10418	1.00437	-0.548391	0.320574	17	No
OTUD4	3.73243	0.548428	0.0792307	0.124382	20	No
OTUD3	2.57421	0.562755	-0.107353	0.205362	20	No
MAFB	0.922345	1.93594	-0.0166667	0.421715	20	No
MAFA	0.157218	0.440909	0.00730471	0.158117	20	No
OTUD1	2.67357	1.5095	0.0561665	0.151809	20	No
BUD31	6.83573	0.816313	-1.60366	0.148095	20	No
OSBPL9	5.63175	0.657073	-0.233328	0.194505	20	No
OSBPL8	3.73551	1.05422	0.00581364	0.131508	20	No
SSX7	0.044736	0.115013	-0.154778	0.110511	17	No
OSBPL7	3.68366	0.470332	-0.246906	0.154873	20	No
OSBPL6	1.9658	0.908709	-0.122675	0.122617	20	No
SSX5	0.00846085	0.0219693	-0.136789	0.109995	17	No
SSX4	0.543269	1.03095	-0.442867	0.162499	17	No
OSBPL5	0.996791	0.87264	0.0632237	0.0998954	20	No
TMEM176B	0.193142	0.460321	0.0357995	0.103405	20	No
TMEM176A	0.12012	0.249614	-0.0169332	0.115835	20	No
MAF1	6.03337	0.560506	-0.249289	0.216262	20	No
SSX3	0.0232445	0.0323456	-0.0623156	0.140981	17	No
OSBPL3	3.38103	0.915947	0.0202826	0.0890175	20	No
OSBPL2	4.20094	0.446146	0.0412708	0.138784	20	No
ITGB3BP	5.44168	0.774645	0.141641	0.11028	20	No
SSX1	2.103	2.59269	-0.134753	0.212626	17	No
FN3K	1.32238	0.753054	-0.0557613	0.113794	20	No
MAEL	0.0798344	0.108103	-0.0157971	0.128568	20	No
RALBP1	4.99455	0.470976	-0.0218518	0.120687	20	No
SEC14L6	0.00215329	0.00512586	-0.0444735	0.142253	20	No
SEC14L5	0.0716711	0.152024	0.0497089	0.154675	20	No
SEC14L4	0.00429244	0.00915434	0.0227866	0.163915	20	No
MAEA	5.60223	0.614681	-0.407757	0.333042	20	No
BUD23	7.68997	0.72905	-1.37938	0.133515	20	No
SEC14L3	0.00643173	0.011471	-0.0916173	0.0998052	20	No
SEC14L2	0.676299	0.437228	0.114296	0.0708231	20	No
SEC14L1	5.90823	0.747296	-0.0977544	0.183419	20	No
GALNS	3.39472	1.09628	-0.000878631	0.12075	20	No
NDUFC2	8.04575	0.403313	-0.435347	0.31517	20	No
NDUFC1	5.80581	0.797946	-0.295052	0.30204	20	No
FMR1	4.73755	0.642404	0.213907	0.125454	17	No
ST7L	2.8268	0.692748	-0.248353	0.136829	20	No
DCTN6	4.67149	0.794242	-0.998279	0.151861	20	No
DCTN5	5.68299	0.581969	-1.3268	0.193908	20	No
MADD	4.35285	0.432283	-0.0866989	0.121049	20	No
DCTN4	3.74146	0.549875	-0.583287	0.182372	20	No
DCTN3	6.53837	0.384507	-0.860317	0.179913	20	No
DCTN2	6.91842	0.514094	-0.766598	0.197722	20	No
OTUB2	1.08746	0.930645	0.120437	0.108516	20	No
BUD13	4.36458	0.499628	-0.708723	0.258874	20	No
DCTN1	5.66282	0.675612	-0.481236	0.119929	20	No
OTUB1	5.85973	0.434663	-0.0312935	0.19162	20	No
NDUFB9	8.14142	0.640821	-0.48931	0.210716	20	No
NDUFB8	7.65316	0.632625	-0.620597	0.222894	20	No
NDUFB7	7.6172	0.532317	-0.4882	0.208339	20	No
CDH9	0.43589	0.317788	0.0721813	0.117857	20	No
NDUFB6	5.994	0.560306	-0.659779	0.292234	20	No
CDH8	1.14665	1.19099	0.284964	0.119434	20	No
NDUFB5	6.47769	0.546549	-0.19195	0.174129	20	No
CDH7	0.00644574	0.0095703	-0.00805898	0.143109	20	No
NDUFB4	7.69608	0.601304	-0.723362	0.285564	20	No
CDH6	0.0702251	0.0492556	-0.0011463	0.118273	20	No
NDUFB3	6.908	0.533195	-0.443272	0.17292	20	No
CDH5	0.0185091	0.0189117	-0.38403	0.157323	20	No
ODF3B	2.03763	1.02567	-0.00768334	0.151025	20	No
NDUFB2	7.67959	0.773946	-0.357005	0.175034	20	No
TMEM45B	0.151715	0.309972	0.0244575	0.0971506	20	No
CDH4	0.348895	0.777858	0.0383913	0.12626	20	No
NDUFB1	8.4514	0.606972	-0.0854109	0.160157	20	No
TMEM45A	1.29935	1.32963	0.22838	0.0987515	20	No
CDH3	0.290927	0.555531	-0.0326087	0.0932693	20	No
CDH2	2.06886	1.88281	0.0316258	0.152195	20	No
HRASLS5	0.0217373	0.0359142	-0.199879	0.138335	20	No
CDH1	1.07539	1.30133	-0.118557	0.16936	20	No
KDELC2	1.32172	1.58712	-0.134039	0.105325	20	No
KDELC1	2.02471	1.64481	-0.0202811	0.163691	20	No
HRASLS2	3.04733	1.57918	-0.0651209	0.160038	20	No
PDPK1	4.31271	0.675431	-0.658712	0.194869	20	No
PPP2CB	4.84485	0.785476	0.199636	0.102626	20	No
PPP2CA	5.96199	0.942817	-1.10972	0.308916	20	No
AOC3	1.91931	0.991306	-0.212219	0.115195	20	No
AOC2	1.78995	0.964174	-0.273623	0.117378	20	No
AOC1	0.314742	0.692466	-0.0506703	0.148688	20	No
ODF2L	2.92786	0.762971	0.0404871	0.126334	20	No
NDUFA9	6.08221	0.79454	-0.398545	0.145836	20	No
NDUFA8	6.18675	0.671667	-0.50608	0.324253	20	No
NDUFA7	6.84482	0.365321	-0.0820983	0.119281	20	No
NDUFA6	5.90723	0.903788	-0.609721	0.288457	20	No
NDUFA5	6.10189	0.581619	-0.309138	0.156121	20	No
NDUFA4	6.42313	0.737158	-0.462596	0.257962	20	No
NDUFA3	7.3231	0.522176	-0.232669	0.19861	20	No
NDUFA2	6.94726	0.502262	-0.659821	0.258831	20	No
NDUFA1	7.67117	0.562272	-0.417337	0.275661	17	No
ZFYVE9	1.74738	0.777896	0.00792158	0.109913	20	No
ZFYVE1	2.91259	0.604191	-0.118768	0.105493	20	No
FMOD	0.440166	0.95417	0.0044969	0.184751	20	No
RTBDN	0.806266	1.24361	-0.151767	0.127901	20	No
RABEPK	4.36319	0.589255	-0.135949	0.187342	20	No
FLRT3	0.827511	1.53264	0.11691	0.140165	20	No
AOAH	0.232054	0.278394	0.286782	0.139819	20	No
FLRT2	0.0346778	0.0517194	0.0742575	0.120463	20	No
FLRT1	0.799725	1.28902	-0.101494	0.142971	20	No
FMO5	0.780572	0.468624	-0.0306301	0.124271	20	No
FMO4	1.33189	0.788169	-0.148008	0.193129	20	No
FMO3	0.650404	1.21205	0.00845462	0.152064	20	No
IFNGR2	4.81006	0.74184	0.0972555	0.157889	20	No
FMO2	0.0264837	0.043495	0.0663323	0.144125	20	No
IFNGR1	3.97114	0.664935	0.140788	0.0988186	20	No
FMO1	0.162033	0.371629	-0.318851	0.134097	20	No
SUCLG2	4.6694	0.685075	-0.0443415	0.136231	20	No
RABEP2	3.93205	0.738271	-0.0525005	0.100239	20	No
SUCLG1	6.33204	0.429777	-0.175134	0.175663	20	No
ADORA1	0.381615	0.508286	-0.0355091	0.127923	20	No
RABEP1	4.24435	0.693338	-0.188097	0.167955	20	No
ATXN3L	0.0891204	0.388467	0.287733	0.120961	17	No
NUF2	5.52942	0.765007	-1.21181	0.218041	20	No
HSP90B1	9.86342	0.638652	-0.796924	0.247332	20	No
GALK2	4.63992	0.611106	-0.138669	0.143045	20	No
GALK1	4.37931	0.673889	-0.203438	0.157265	20	No
FMN2	0.0771599	0.11555	0.182384	0.0922599	20	No
FMN1	1.26981	1.39947	-0.0238322	0.118004	20	No
TRPC4AP	5.13022	0.404986	0.172101	0.107935	20	No
ATXN2L	7.38638	0.525621	-0.353072	0.198589	20	No
TMEM41B	4.40357	0.557666	-0.505075	0.21169	20	No
TMEM41A	4.40072	0.52034	-0.015987	0.112922	20	No
NUDC	6.32446	0.614995	-0.89733	0.172348	20	No
TMEM170B	0.981853	0.736491	0.0117863	0.126668	20	No
SSR4	9.6085	0.897532	-0.105845	0.155909	17	No
TMEM170A	3.62213	0.60631	0.000321242	0.169372	20	No
SSR3	8.17344	0.704317	-0.0415977	0.200447	20	No
SSR2	9.16273	0.75563	-0.243796	0.190393	20	No
SSR1	7.14926	0.565214	-0.0472929	0.176009	20	No
PMAIP1	4.90473	1.58838	0.230173	0.115378	20	No
ATP5MGL	0.107101	0.0850558	-0.251895	0.17072	20	No
ATXN1L	4.0137	0.631903	-0.0542249	0.188468	20	No
HBQ1	0.0877478	0.207461	0.0435979	0.0990184	20	No
MEDAG	0.0146849	0.032998	-0.0417226	0.136097	20	No
OR10AG1	0.00354694	0.0125622	0.0359341	0.112601	20	No
CDC7	3.39701	0.908539	-1.56054	0.224651	20	No
CDC6	5.49181	1.14896	-1.11772	0.180291	20	No
ST20	2.59352	0.859783	-0.446227	0.117899	20	No
SSPN	0.572134	0.49544	-0.128348	0.132827	20	No
MAPKAP1	5.51409	0.46562	-0.469484	0.210458	20	No
ATXN10	5.48431	0.830061	-0.229804	0.151798	20	No
RIPOR3	0.176993	0.212325	-0.0616002	0.154624	20	No
RIPOR2	0.910886	1.34045	-0.200723	0.0921678	20	No
RIPOR1	3.44367	1.19819	0.119977	0.127849	20	No
HBP1	4.85189	0.781577	-0.0583434	0.111815	20	No
ST18	0.0345887	0.0694453	0.0124997	0.225613	20	No
SUPT20H	4.5167	0.52286	-0.738807	0.233281	20	No
ST14	2.98431	2.79079	0.0357143	0.125996	20	No
ST13	7.02249	0.471308	-0.314506	0.163813	20	No
ASCL5	0.0879431	0.123738	-0.227131	0.238221	20	No
PNMA5	0.827524	2.11134	0.0563436	0.0898541	17	No
ASCL4	0.00429952	0.00797113	-0.166584	0.155308	20	No
ASCL3	0.0387599	0.101337	0.150434	0.119183	20	No
CATIP	0.0788693	0.117624	-0.0818813	0.149576	20	No
PNMA3	0.0370027	0.0455564	0.15054	0.110128	17	No
ASCL2	0.0169706	0.0261058	0.163637	0.12258	20	No
PNMA2	0.486838	0.924683	0.0992952	0.132845	20	No
ASCL1	0.429087	1.03248	-0.0545934	0.146249	20	No
PNMA1	3.30758	1.3265	-0.0588254	0.144968	20	No
NOL4L	2.23375	0.885017	0.0206265	0.0978029	20	No
NUB1	3.98401	1.21425	0.0281989	0.17326	20	No
DHRSX	2.6803	0.693961	-0.573796	0.417561	17	No
CACNA1S	0.00848872	0.0200778	-0.0233375	0.139822	20	No
ALOX5	2.03002	1.87065	-0.101081	0.143653	20	No
CACNA1I	0.00926091	0.0157249	-0.0763413	0.114421	20	No
CACNA1H	0.0227144	0.0229994	-0.0597444	0.100725	20	No
CACNA1G	0.0383533	0.0472932	-0.300846	0.176909	20	No
CACNA1F	0.117254	0.155729	0.0398732	0.155137	17	No
CACNA1E	0.234944	0.672333	-0.016469	0.102963	20	No
KRTAP5-11	0.00494792	0.0162499	-0.11475	0.15625	20	No
CACNA1D	0.45976	0.963834	-0.0375653	0.0959785	20	No
KRTAP5-10	0.0196641	0.0335055	-0.116596	0.100472	20	No
CACNA1C	0.197979	0.392461	-0.0226854	0.17234	20	No
CACNA1B	0.0281591	0.0342705	-0.0314609	0.107483	20	No
CACNA1A	1.10368	1.50464	-0.241383	0.153835	20	No
CYSTM1	5.40522	0.903584	0.143608	0.155271	20	No
OR10AD1	0.234714	0.446022	-0.0112762	0.110071	20	No
DHRS9	0.104213	0.158105	0.129107	0.0893225	20	No
DHRS7	4.90131	1.65304	-0.0685116	0.13784	20	No
AKAP8L	5.74215	0.597813	-0.130558	0.128806	20	No
DHRS4	4.68788	0.570771	-0.309246	0.173081	20	No
DHRS3	0.614454	1.13017	-0.139169	0.120308	20	No
DHRS2	1.38255	1.26797	-0.130157	0.114584	20	No
SMYD5	4.30123	0.5076	-0.13913	0.158385	20	No
DHRS1	3.87979	0.609972	-0.173564	0.113369	20	No
SMYD4	2.87234	0.496394	0.00333194	0.129628	20	No
SMYD3	3.5664	1.01922	0.0972281	0.0977993	20	No
SMYD2	3.57476	0.963299	-0.0651987	0.128733	20	No
SMYD1	0.0104499	0.0304645	-0.0522805	0.128578	20	No
SUCLA2	4.53514	0.557755	-0.210346	0.178028	20	No
CFAP97	4.31668	0.614024	0.0678059	0.123588	20	No
RECQL5	4.54713	0.508358	-0.00203274	0.160573	20	No
REG3G	0.00904558	0.0291742	-0.000939614	0.11999	20	No
AIFM3	0.169545	0.137081	-0.132107	0.145602	20	No
AIFM2	3.39011	1.16673	-0.146359	0.215015	20	No
ATP5MC3	8.53655	0.700067	0.0800031	0.115574	20	No
AIFM1	5.92302	0.762567	-0.634249	0.239457	17	No
ATP5MC2	8.90179	0.573634	-0.192891	0.150664	20	No
ATP5MC1	8.52408	0.629719	-0.42729	0.158961	20	No
REG3A	0.00634864	0.0191706	0.123809	0.0801096	20	No
KRTAP8-1	0.0150325	0.0458408	-0.0601628	0.115204	20	No
GNRHR	0.168354	0.0991127	0.00520746	0.0698148	20	No
NOL12	4.70932	0.614837	-0.715585	0.136891	20	No
NOL11	5.2395	0.637796	-0.608722	0.137037	20	No
NOL10	4.66806	0.47769	-1.38402	0.164063	20	No
CFAP77	0.0323634	0.0354929	-0.191464	0.133956	20	No
CFAP73	0.405238	0.416108	0.0222392	0.131012	20	No
CFAP70	1.10819	0.895207	-0.1682	0.0830495	20	No
GNRH2	0.231547	0.313114	-0.0787543	0.132969	20	No
LAPTM4B	1.54732	1.87332	-0.132322	0.118736	20	No
GNRH1	0.977994	0.33551	0.109729	0.150545	20	No
LAPTM4A	6.03605	1.14745	-0.0576414	0.156068	20	No
TBXAS1	2.05967	1.22264	0.0600186	0.121116	20	No
REG1B	0	0	0.0533307	0.119158	20	No
REG1A	0.105022	0.314449	0.014607	0.0811077	20	No
SPATC1	0.0821285	0.15324	0.0798856	0.14172	20	No
CFAP69	0.839543	0.748433	-0.11748	0.1161	20	No
CFAP65	0.0467214	0.0988093	-0.0756636	0.167442	20	No
CFAP61	0.237834	0.190547	0.0784592	0.121761	20	No
C12orf4	3.4939	0.655617	-0.0367336	0.108778	20	No
EIF2AK4	4.137	0.735364	-0.0469264	0.127724	20	No
PJA2	5.07843	0.603822	0.0441086	0.118562	20	No
EIF2AK3	5.52657	1.09346	0.00195313	0.37621	20	No
PJA1	3.41069	1.01111	0.117267	0.118747	17	No
EIF2AK2	3.31193	0.944197	0.0651104	0.140846	20	No
EIF2AK1	5.59266	0.595748	0.0481716	0.166342	20	No
SLC28A3	0.174881	0.424568	-0.0211991	0.151982	20	No
SLC28A2	0.0513699	0.0698492	-0.132176	0.118293	20	No
CFAP58	0.118423	0.119785	-0.17945	0.0893861	20	No
SLC28A1	0.0742958	0.184374	0.0412965	0.112179	20	No
CFAP57	0.158191	0.237687	-0.199904	0.150131	20	No
CFAP53	0.839383	0.843797	0.225767	0.0841019	20	No
CFAP52	0.0412003	0.0638426	-0.00290908	0.141945	20	No
GSPT2	2.3331	1.55977	-0.0602559	0.193284	17	No
GSPT1	6.8381	0.531818	-1.28425	0.187977	20	No
PSKH2	0.00214622	0.00681962	-0.165211	0.161281	20	No
PSKH1	3.77832	0.586686	0.0749228	0.130108	20	No
ROCK2	2.51339	0.382576	-0.144123	0.183004	20	No
ROCK1	4.4486	0.524092	-0.390189	0.185603	20	No
ARHGAP45	6.2197	0.708963	-0.599382	0.311267	20	No
ARHGAP44	0.403397	0.355784	0.219008	0.0816161	20	No
SPATA9	0.558302	0.438077	-0.0598089	0.125681	20	No
SPATA8	0	0	0.0504426	0.0720431	20	No
FAAH2	2.79767	1.42042	0.205307	0.102303	17	No
SPATA7	1.64749	0.533935	0.0412226	0.0946705	20	No
SPATA6	0.337306	0.357428	0.159768	0.120531	20	No
SPATA5	1.81187	0.52611	-0.951	0.167393	20	No
SPATA4	0.175497	0.243593	-0.0516391	0.104682	20	No
ZNRF4	0	0	0.00721826	0.14851	20	No
SPATA3	0.0122139	0.044436	-0.00996682	0.142509	20	No
ZNRF3	1.74298	0.810119	-0.0210493	0.101641	20	No
SPATA2	2.5634	0.487563	0.0381086	0.134958	20	No
ZNRF2	3.02911	0.67435	-0.0987737	0.161847	20	No
ZNRF1	2.45447	1.18908	0.117245	0.154284	20	No
CFAP47	0.489101	0.541748	0.0634921	0.0726994	17	No
CFAP46	0.00999227	0.014333	0.0472165	0.0839686	20	No
CFAP45	0.639933	0.278694	-0.0897489	0.130466	20	No
CFAP44	2.57411	0.718416	-0.225668	0.16637	20	No
CFAP43	0.223911	0.263159	0.0444337	0.104844	20	No
PINK1	3.26343	0.954826	-0.149217	0.155071	20	No
ARHGAP39	0.778415	0.808218	0.0340233	0.154244	20	No
ARHGAP36	0.00143553	0.00430659	0.0892881	0.0882331	17	No
ARHGAP35	3.3774	0.759437	0.273922	0.105395	20	No
FMC1	4.29391	0.600997	-0.0429424	0.0818133	20	No
ARHGAP33	3.6758	0.683959	0.00121954	0.130063	20	No
OGFRL1	2.75093	0.891061	0.216656	0.123478	20	No
SSH3	1.37395	0.868408	0.0260179	0.12642	20	No
ARHGAP32	1.07928	0.991721	0.138649	0.125388	20	No
SSH2	4.39497	0.488258	-0.261541	0.12304	20	No
ARHGAP31	1.22817	1.12057	-0.11012	0.127553	20	No
SSH1	2.63594	0.478948	-0.264681	0.120644	20	No
ARHGAP30	5.78899	1.72251	-0.0778098	0.223044	20	No
CFAP36	3.02776	1.03185	-0.0692628	0.138808	20	No
HBG2	1.07171	1.1572	-0.0152653	0.107372	20	No
HBG1	0.0718557	0.11974	-0.0238648	0.0862279	20	No
CD99	3.52603	2.41066	0.0435539	0.0893431	17	No
CD96	0.916442	1.43926	-0.01049	0.131886	20	No
ARHGAP29	0.172289	0.0886813	-0.0425565	0.125199	20	No
ARHGAP28	0.484544	0.790558	0.117666	0.109827	20	No
CD93	0.248727	0.705803	0.0133493	0.149987	20	No
ARHGAP27	4.38479	1.03278	-0.0565866	0.202948	20	No
ARHGAP26	2.46871	1.02678	0.146938	0.129922	20	No
ARHGAP25	2.48351	1.64148	-0.0551927	0.132728	20	No
ARHGAP24	0.647804	0.828207	0.156747	0.0786775	20	No
ARHGAP23	3.39115	0.944805	-0.392384	0.189412	20	No
ARHGAP22	0.920864	1.05649	0.116104	0.11687	20	No
ARHGAP21	4.44269	0.826613	0.0204558	0.135385	20	No
ARHGAP20	0.216284	0.534052	0.0736898	0.128361	20	No
ASCC3	3.62992	0.530575	-0.209629	0.16122	20	No
ASCC2	5.17364	0.681738	0.0504308	0.205043	20	No
ASCC1	4.48827	0.549322	-0.178335	0.13898	20	No
ZNRD1	5.2839	0.566295	-0.813225	0.233838	20	No
RMND1	3.37677	0.608333	-0.198294	0.164109	20	No
RRM2B	3.27536	0.701972	0.0150389	0.164869	20	No
CD8B	0.982452	2.31562	-0.593132	0.133951	20	No
CD8A	0.361276	0.524748	0.0511853	0.142644	20	No
METTL9	5.7996	0.598829	0.0489571	0.116578	20	No
METTL8	3.52197	0.762033	0.0279773	0.159359	20	No
METTL6	3.92993	0.572205	0.0128858	0.103555	20	No
CFAP20	4.95263	0.862173	-0.746584	0.293786	20	No
METTL5	6.30367	0.299949	-0.236923	0.180522	20	No
METTL4	3.90928	0.473309	0.0738465	0.141139	20	No
METTL3	5.54098	0.453486	-1.05669	0.178928	20	No
AKAP14	0.0673037	0.110973	0.147699	0.0969626	17	No
AKAP13	4.70979	0.561149	-0.0979189	0.0804155	20	No
METTL1	5.03649	0.778025	-0.573797	0.349107	20	No
AKAP12	0.654537	0.889264	0.0363836	0.101952	20	No
CD86	1.52889	1.71734	0.0328808	0.12919	20	No
AKAP11	2.78486	0.536229	0.0197939	0.0990111	20	No
ARHGAP19	3.87352	0.567525	-0.0991501	0.142111	20	No
AKAP10	3.83289	0.667853	-0.0467289	0.170007	20	No
CD84	0.0210469	0.0349665	0.0998101	0.126393	20	No
ARHGAP18	2.4403	1.01759	0.11648	0.145243	20	No
CD83	1.36987	1.44246	0.0222325	0.117016	20	No
ARHGAP17	4.54137	1.02021	0.102056	0.110147	20	No
CD82	2.67362	2.02136	-0.260685	0.144982	20	No
CD81	4.54211	2.31115	-0.0208657	0.107352	20	No
ITGAX	0.351418	0.48885	0.0885472	0.124622	20	No
ARHGAP15	2.10693	1.92098	-0.0093473	0.126104	20	No
CD80	0.507995	1.29585	-0.0215566	0.0913775	20	No
ITGB8	1.58848	1.2965	0.0495353	0.164969	20	No
ITGB7	7.47995	2.87294	-0.0810545	0.117256	20	No
ITGAV	2.79753	0.670758	-0.204346	0.236404	20	No
ITGB6	0.0588685	0.0929511	-0.0876419	0.128552	20	No
ARHGAP12	2.72443	0.505441	0.0808683	0.122503	20	No
ITGB5	3.63221	2.29541	-0.266276	0.187213	20	No
ITGB4	1.49302	0.579801	-0.0554104	0.123384	20	No
ARHGAP10	3.2231	1.41753	0.203458	0.143839	20	No
ITGB3	0.286126	0.695833	-0.125449	0.0951222	20	No
ITGB2	1.71928	1.81305	0.0758378	0.164033	20	No
ITGB1	5.548	1.26258	-0.0164395	0.169177	20	No
ITGAM	0.422186	0.364274	-0.0361257	0.127444	20	No
ITGAL	3.72182	2.27341	-0.0910933	0.117691	20	No
HBE1	1.29033	1.53442	0.190432	0.0935181	20	No
PPP1R8	5.23143	0.560319	-1.29998	0.201695	20	No
PPP1R7	6.48284	0.68258	-0.807921	0.253016	20	No
ITGAE	4.86761	0.75989	0.112559	0.112408	20	No
ITGAD	0.0271885	0.0435841	-0.00882372	0.0841192	20	No
PPP1R2	5.68485	0.90202	-0.909966	0.261577	20	No
RHOT2	6.26663	0.558265	-0.0318691	0.164863	20	No
RHOT1	4.15448	0.538998	-0.11097	0.140493	20	No
CD74	7.91358	3.83505	0.110945	0.218285	20	No
CD72	0.73163	0.801679	0.186718	0.129432	20	No
ITGA9	0.0646966	0.121623	-0.251241	0.154011	20	No
CD70	4.79337	2.37302	0.150328	0.140549	20	No
ITGA8	2.53193	2.06785	-0.130095	0.147378	20	No
ITGA7	1.74107	0.925851	-0.204642	0.143182	20	No
ITGA6	2.40397	1.39757	-0.14728	0.120177	20	No
ITGA5	0.608267	0.53145	-0.12133	0.0995504	20	No
ITGA4	5.68055	1.10672	-0.247538	0.174987	20	No
ITGA3	3.17652	1.19057	-0.143088	0.175712	20	No
ITGA2	0.361918	0.372098	0.0482594	0.106085	20	No
ITGA1	0.0678923	0.0566892	-0.0276202	0.103623	20	No
BCKDHB	3.65327	0.5998	-0.19133	0.139241	20	No
BCKDHA	5.27832	0.569632	-0.0362661	0.160227	20	No
CD69	1.11199	1.74936	0.166825	0.13048	20	No
CD68	1.4571	1.517	-0.112463	0.12166	20	No
NUP214	4.61696	0.458883	-0.875633	0.127055	20	No
CD63	8.34539	0.783117	-0.00772392	0.102519	20	No
NUP210	6.57822	0.725693	-0.0233684	0.0922527	20	No
BLZF1	3.3578	0.84444	-0.0685263	0.17939	20	No
CD5L	0.199472	0.305872	-0.233607	0.154797	20	No
PDCD2L	4.67288	0.61798	-0.122502	0.229756	20	No
CD59	7.66784	1.112	0.199602	0.0970473	20	No
CD58	4.45802	1.21295	-0.121599	0.148078	20	No
CCT8	7.86166	0.409139	-0.856729	0.154884	20	No
CCT7	8.16403	0.489306	-0.584405	0.133211	20	No
CCT5	8.12934	0.609032	-1.05453	0.147161	20	No
CD55	4.72787	1.1063	-0.047362	0.165187	20	No
NUP205	5.76553	0.690454	-1.11941	0.223768	20	No
CCT4	7.00398	0.459578	-1.71688	0.198062	20	No
CD53	4.92901	2.57521	-0.142726	0.105406	20	No
CCT3	8.38611	0.79193	-1.76463	0.172923	20	No
CCT2	7.61961	0.582676	-1.27591	0.194321	20	No
CD52	1.31846	1.97742	-0.0428941	0.111214	20	No
ANO9	2.37006	1.46162	0.144799	0.160593	20	No
ANO8	2.32041	0.69506	0.0288647	0.127827	20	No
ANO7	0.293903	0.270235	0.0975881	0.100708	20	No
ANO6	3.86589	0.726747	-0.0202471	0.0936222	20	No
MED31	3.55707	0.708438	-0.519659	0.200986	20	No
ANO5	1.80922	1.08157	-0.0444049	0.100039	20	No
MED30	4.26546	0.840894	-1.90299	0.311212	20	No
ANO4	0.316742	0.646562	-0.114264	0.147076	20	No
ANO3	0.145833	0.306126	0.0696985	0.0943765	20	No
ANO2	0.0839234	0.151697	-0.084589	0.135164	20	No
ANO1	0.283886	0.583307	-0.0744537	0.145279	20	No
UNC119B	3.96341	0.689239	-0.198682	0.163555	20	No
CD48	7.23689	2.118	-0.146644	0.137012	20	No
CD47	5.84119	0.611883	0.0250625	0.118032	20	No
CD46	6.18644	0.781645	0.142145	0.0878421	20	No
CD44	5.30778	2.71252	-0.0141216	0.142026	20	No
GPR37L1	0.0213518	0.0191535	-0.151877	0.103381	20	No
CD40	1.05201	1.69531	0.0590139	0.160562	20	No
MED29	4.49633	0.517302	-0.713191	0.180175	20	No
MED28	4.85424	0.566131	-0.891164	0.173182	20	No
MED27	4.33188	0.60601	-0.493959	0.165292	20	No
MED26	3.22373	0.287241	-1.07907	0.197656	20	No
MED25	4.91265	0.637562	-0.465662	0.264309	20	No
MED24	5.77073	0.489859	-0.870776	0.260467	20	No
MED23	3.41027	0.511513	-0.723472	0.318764	20	No
CD3G	0.115902	0.237125	-0.0381391	0.122068	20	No
MED22	4.50224	0.485174	-1.02688	0.167579	20	No
MED21	4.39061	0.766226	-0.801721	0.216146	20	No
CD3E	1.75358	1.7251	-0.0245207	0.114052	20	No
MED20	4.11278	0.647094	-0.804059	0.152676	20	No
CD3D	0.26792	0.603576	-0.120298	0.111674	20	No
KRTDAP	0	0	-0.365694	0.132561	20	No
PDCD11	4.91691	0.72415	-1.25359	0.209312	20	No
HBA1	0.948843	2.00659	0.279573	0.122366	20	No
PDCD10	5.86158	0.588885	-0.0167574	0.292896	20	No
CCR9	0.0818543	0.108625	0.0700124	0.152293	20	No
CD38	3.81234	1.63726	-0.0591485	0.120304	20	No
CCR8	0.0697148	0.106958	-0.110687	0.153572	20	No
SLC2A4RG	5.21662	1.08996	0.0616395	0.131329	20	No
CCR7	0.542831	1.59366	-0.0630159	0.140006	20	No
CD37	3.11568	2.67301	-0.127984	0.128481	20	No
CD36	0.111223	0.178353	0.0114505	0.128021	20	No
CCR6	0.0503598	0.165165	0.0518301	0.102127	20	No
CCR5	0.648102	1.04597	-0.281384	0.151602	20	No
CD34	0.0120774	0.0195301	0.0654795	0.134188	20	No
CCR4	0.101445	0.34054	-0.0615971	0.115955	20	No
CD33	1.34452	1.61721	0.209276	0.121349	20	No
CCR3	1.55906	1.44016	-0.106871	0.149752	20	No
TIFAB	0.00712869	0.0138308	-0.0610446	0.144353	20	No
CCR2	1.97441	2.26627	-0.271053	0.109773	20	No
CCR1	3.5012	2.29254	-0.0731658	0.133527	20	No
MED19	4.00605	0.602502	-1.0398	0.33698	20	No
MED18	3.81199	0.668558	-0.99079	0.174905	20	No
MED17	4.00986	0.571162	-1.29679	0.31747	20	No
MED16	4.7951	0.514305	-0.442937	0.272175	20	No
MED15	4.49674	0.674039	-0.545728	0.216522	20	No
MED14	4.06497	0.35929	-1.14688	0.249108	17	No
MED13	3.94867	0.720299	-0.0924774	0.221646	20	No
CASZ1	0.170626	0.259827	-0.321003	0.120127	20	No
MECP2	4.3287	0.683445	0.213762	0.0927959	17	No
MED12	4.04215	0.687287	-0.980358	0.226416	17	No
MED11	3.76952	0.669912	-1.80292	0.28572	20	No
MED10	5.51046	0.721743	-1.01797	0.303368	20	No
MECOM	0.587259	0.595408	0.142506	0.0621235	20	No
ANLN	3.66789	0.830737	-0.508493	0.21625	20	No
MCRIP2	5.31302	0.580681	-0.24842	0.174191	20	No
MCRIP1	4.02459	0.937075	-0.162344	0.122776	20	No
CD28	5.09431	1.5696	0.182517	0.117888	20	No
TALDO1	7.1917	0.623185	0.0221991	0.113018	20	No
CD27	0.491148	0.172536	-0.236631	0.140092	20	No
LRPAP1	7.20386	0.612709	-0.0220377	0.191122	20	No
CD22	0.383168	1.35902	-0.06118	0.09029	20	No
SERPINA12	0	0	-0.0147171	0.117002	20	No
SERPINA11	0.00356067	0.0109114	0.0347437	0.132578	20	No
SERPINA10	0.0448974	0.0591455	0.117775	0.111035	20	No
ZFR2	0.0106406	0.0199776	-0.185858	0.126302	20	No
CD1E	0.0164999	0.0446045	-0.035074	0.137592	20	No
CD1D	0.130517	0.314307	-0.42807	0.232948	20	No
CD1C	0.00687518	0.0299682	-0.221165	0.183642	20	No
CD1B	0.00566569	0.0163324	0.0258191	0.140326	20	No
CD1A	0.010669	0.017809	0.111027	0.171131	20	No
ANKH	4.38379	0.897225	-0.0649538	0.112998	20	No
CD19	0.421358	1.14491	-0.0432977	0.0893724	20	No
CD14	0.307225	0.254707	0.00113987	0.115315	20	No
ADH1B	0.00143553	0.00430659	-0.0497979	0.0991343	20	No
ADH1A	0.0187258	0.0603489	0.0326666	0.0873764	20	No
ANK3	1.19684	1.57302	0.00677896	0.125196	20	No
ANK2	1.3195	0.967413	0.174287	0.114841	20	No
ANK1	0.269237	0.681439	0.155271	0.135719	20	No
CCNY	4.75569	0.381841	0.243787	0.151355	20	No
COL18A1	0.880081	0.907544	-0.106938	0.145592	20	No
CCNO	1.4337	1.06126	0.0248683	0.157497	20	No
ZG16	0.00358882	0.00621602	0.00102163	0.140366	20	No
PPARG	0.0744908	0.044756	0.104755	0.0992552	20	No
CCNK	5.31182	0.590041	-0.901732	0.200071	20	No
ZFP3	0.631677	0.84984	-0.0399598	0.128107	20	No
CCNJ	1.90907	0.762247	-0.139699	0.0940324	20	No
ZFP2	0.068294	0.0980305	0.244568	0.102099	20	No
CCNI	6.22681	0.520138	0.0607702	0.119833	20	No
ZFP1	2.65353	0.618295	0.174659	0.119976	20	No
PPARD	2.90198	0.432314	-0.121828	0.129666	20	No
CCNH	5.52553	0.628162	-1.16822	0.131373	20	No
L2HGDH	3.14478	0.680946	-0.0345858	0.150758	20	No
CCNF	3.93461	0.885156	-0.23162	0.239009	20	No
PPARA	1.99083	0.579621	-0.0573877	0.0817455	20	No
CCNC	5.67645	0.587619	-0.656389	0.269614	20	No
PISD	4.06209	0.620545	-0.0853057	0.168041	20	No
JOSD2	4.17713	0.760711	0.207565	0.102443	20	No
JOSD1	4.80799	0.517305	-0.203932	0.126096	20	No
DCST2	0.429273	0.275117	-0.249525	0.156069	20	No
DCST1	0.0753563	0.0842755	-0.209488	0.154488	20	No
PIRT	0	0	0.0202501	0.109169	20	No
ANHX	0	0	-0.10845	0.141738	20	No
NTN5	0.116954	0.1987	-0.117568	0.150489	20	No
NTN4	0.173377	0.259897	-0.0648562	0.134579	20	No
NTN3	0.125179	0.103317	0.127927	0.135255	20	No
NTN1	0.233553	0.489486	-0.0636575	0.108287	20	No
CCM2	5.48965	0.627843	-0.344334	0.220508	20	No
VWC2L	0.0268827	0.0677804	0.058291	0.12301	20	No
CCL8	0.00142846	0.0062265	0.0992824	0.12947	20	No
CCL7	0.0144032	0.0432588	-0.190193	0.135163	20	No
CWC27	4.63592	0.634083	0.0920031	0.119705	20	No
CWC25	4.45839	0.370554	-0.472507	0.126936	20	No
CCL5	2.98501	1.92969	-0.275421	0.150322	20	No
CCL4	1.343	1.85479	-0.0740728	0.165193	20	No
TMEM39B	3.82858	0.505652	-0.18639	0.123425	20	No
CCL3	6.48907	2.84031	-0.0820495	0.172225	20	No
TMEM39A	4.97434	0.603089	0.0847703	0.187134	20	No
CCL2	0.608612	0.900607	0.0816164	0.0774113	20	No
CWC22	3.78271	0.568408	-1.39883	0.203059	20	No
CCL1	0.602537	0.789155	-0.267199	0.137615	20	No
CASKIN2	1.02812	0.707458	-0.116914	0.163152	20	No
CASKIN1	0.295532	0.472026	-0.165984	0.146195	20	No
OBP2A	0.165548	0.549991	-0.321986	0.13659	20	No
TMEM38B	3.53995	0.555381	-0.125619	0.0850832	20	No
TMEM38A	3.79498	0.791662	-0.272909	0.111995	20	No
FLT4	0.0503442	0.0877518	0.0765677	0.106727	20	No
FLT3	0.176639	0.332457	-0.188677	0.154723	20	No
FLT1	0.136149	0.173815	-0.0453578	0.0880283	20	No
TMEM167B	4.17558	0.616104	-0.0949936	0.137205	20	No
ZFC3H1	4.6215	0.417611	-0.755022	0.219149	20	No
TMEM167A	5.83181	0.454474	-0.45945	0.264679	20	No
CASS4	0.208292	0.657166	-0.230244	0.13556	20	No
TBRG4	6.24313	0.58918	-0.265047	0.25137	20	No
PNLIP	0.00213222	0.00929412	0.0670644	0.100557	20	No
TBRG1	4.49367	0.493334	-0.0653195	0.154927	20	No
MUS81	5.58046	0.47179	-0.33864	0.165009	20	No
HAX1	7.84825	0.808442	-0.390461	0.158978	20	No
TIMELESS	5.02852	0.966625	-1.57484	0.211318	20	No
CCIN	0.00358882	0.00621602	-0.212367	0.162004	20	No
KDM7A	2.20054	0.874791	-0.0327155	0.146896	20	No
ARL6IP6	4.11976	0.641447	-0.168489	0.137408	20	No
ARL6IP5	5.90257	0.89686	-0.0948875	0.145894	20	No
ARL6IP4	7.14151	0.502361	-0.135199	0.0891585	20	No
ARL6IP1	6.75686	0.615772	0.0932445	0.102624	20	No
PIN4	4.47377	0.608131	-0.194297	0.111522	17	No
PIN1	6.54951	0.413283	-0.0209738	0.162129	20	No
KDM6B	2.91971	0.847728	-0.12137	0.140518	20	No
KDM6A	3.07071	1.39692	0.231562	0.286648	17	No
CASQ2	0.00143553	0.00430659	-0.156068	0.148724	20	No
CASQ1	0.258611	0.182155	-0.125248	0.162936	20	No
NPEPPS	5.94071	0.43846	-0.606824	0.19324	20	No
VAT1L	0.0479885	0.0799292	0.0212748	0.0975398	20	No
PI4K2B	4.22035	0.551271	0.149536	0.11932	20	No
PI4K2A	3.12216	0.631875	-0.14016	0.13202	20	No
TMEM35B	3.63855	0.605497	0.0940859	0.0737771	20	No
TMEM35A	0.00855715	0.0144808	0.0576675	0.0766134	17	No
GTF2A1L	0.0527188	0.137624	-0.20107	0.142188	20	No
SUPT16H	6.1733	0.732836	-1.09395	0.223853	20	No
CASP9	3.21208	0.529545	-0.123275	0.121437	20	No
PIM3	5.17973	0.838183	0.00437457	0.119105	20	No
CASP8	5.86915	0.70044	0.0867657	0.164124	20	No
PIM2	8.95	1.24557	-0.917623	0.334867	17	No
CASP7	4.14777	0.7312	-0.0559192	0.113212	20	No
LPIN3	1.07816	1.26385	0.0404422	0.116121	20	No
PIM1	5.40395	1.22516	0.0998505	0.133569	20	No
CASP6	3.83123	0.991098	-0.00271204	0.145544	20	No
LPIN2	2.9754	0.833817	0.0862669	0.129634	20	No
CASP5	0.0576162	0.0929803	0.060664	0.153473	20	No
KDM5C	5.12718	0.505186	-0.510016	0.321597	17	No
LPIN1	5.5485	0.814929	0.222698	0.106439	20	No
CASP4	4.60162	1.47025	0.0875808	0.121932	20	No
KDM5B	2.71686	1.63905	0.112011	0.142186	20	No
PPP1CC	6.70941	0.571082	-0.20263	0.137673	20	No
CASP3	5.97161	0.721157	0.0343051	0.182134	20	No
KDM5A	3.67461	0.591897	-0.157356	0.248875	20	No
PPP1CB	5.78683	0.711888	-0.679447	0.205161	20	No
CASP2	4.34915	0.701077	0.23993	0.102492	20	No
PPP1CA	7.01965	0.496448	-0.590654	0.250213	20	No
CASP1	4.39843	1.61766	-0.0260469	0.151199	20	No
SEPT9	5.7498	1.65128	-0.16193	0.110692	20	No
SEPT8	3.56661	1.19877	0.00668976	0.159426	20	No
SEPT6	6.53962	0.996351	0.112548	0.0991115	17	No
SEPT5	0.630958	0.729271	-0.0181071	0.113353	20	No
SEPT4	0.424934	0.501139	-0.0979211	0.13865	20	No
SEPT3	1.29552	1.02753	0.00853912	0.121994	20	No
SEPT2	7.36578	0.764906	-0.104169	0.196202	20	No
DPYSL5	0.190844	0.522254	-0.0802153	0.12175	20	No
SEPT1	3.5506	2.05737	0.0420971	0.130734	20	No
DPYSL4	0.603847	1.236	0.0302084	0.115803	20	No
DPYSL3	2.07015	1.85826	0.149701	0.0943407	20	No
DPYSL2	3.33562	1.6712	0.0731637	0.0673768	20	No
KDM4E	0.000717765	0.00312866	0.0522473	0.186765	20	No
KDM4D	0.677002	0.242433	0.105391	0.120953	20	No
KDM4C	3.75862	0.499339	-0.110649	0.123158	20	No
KDM4B	3.83778	0.497286	0.145542	0.19527	20	No
KDM4A	4.31125	0.544538	-0.324248	0.163818	20	No
JARID2	3.13494	0.399511	0.147732	0.180817	20	No
HAT1	5.75203	0.788501	-0.120872	0.180704	20	No
PFDN6	7.3957	0.569743	-1.21007	0.16704	20	No
PFDN5	9.02373	0.410392	-0.589063	0.185886	20	No
PFDN4	6.36428	0.441123	-0.486036	0.220798	20	No
PFDN2	7.58089	0.587613	-1.55014	0.162204	20	No
PFDN1	6.20797	0.407241	-0.787617	0.397021	20	No
KDM3B	4.93113	0.499982	0.0898495	0.136613	20	No
KDM3A	4.67313	0.647605	0.130619	0.151827	20	No
FLNC	0.19407	0.293762	-0.0320692	0.13052	20	No
HARS	5.94952	0.497096	-1.22383	0.184294	20	No
FLNB	3.02037	1.4645	-0.0676028	0.110863	20	No
HAS3	0.695951	0.536059	0.126111	0.131311	20	No
FLNA	7.65315	1.10458	0.157298	0.0872974	17	No
HAS2	0.117284	0.397535	0.0220614	0.149288	20	No
NTF4	0.129276	0.341136	-0.28655	0.117219	20	No
GAGE12J	0.574813	1.77766	-0.562797	0.196882	17	No
HAS1	0.00924718	0.0169168	0.118414	0.128364	20	No
NTF3	0.342632	0.872881	-0.299064	0.144323	20	No
GAGE12H	0.476971	2.05678	-0.076586	0.0991694	17	No
GAGE12E	0.729691	2.18503	0.524609	0.0815581	17	No
NLGN4X	0.495394	0.805428	0.0719263	0.0868953	17	No
TDGF1	0.00973209	0.030533	-0.605455	0.163508	20	No
SRRT	6.60915	0.559326	-0.76875	0.182175	20	No
TMEM161B	4.21333	0.33193	-0.234258	0.198602	20	No
TMEM161A	4.99985	0.485898	-0.0576467	0.135916	20	No
KDM2B	4.54099	0.673568	-0.085548	0.111534	20	No
KDM2A	5.49994	0.621693	-0.670339	0.240031	20	No
RALGPS2	2.76023	1.50445	0.0631513	0.147322	20	No
RALGPS1	2.51914	0.837469	-0.271593	0.184864	20	No
SRRD	4.0019	0.766329	-0.281424	0.177384	20	No
NMUR2	0.00356775	0.0099401	0.00293569	0.123788	20	No
NMUR1	0.0415764	0.158415	-0.0261534	0.139329	20	No
KDM1B	2.86138	0.583649	-0.00354303	0.12262	20	No
KDM1A	5.49156	0.478544	-0.329133	0.195319	20	No
KLHDC9	2.1994	1.13396	-0.128014	0.151586	20	No
NPEPL1	3.24187	0.737104	0.134244	0.114481	20	No
KLHDC4	5.58823	0.680745	-0.168433	0.127647	20	No
KLHDC3	6.03355	0.452721	-0.143369	0.245964	20	No
KLHDC2	4.64309	0.547768	0.0536024	0.155588	20	No
KLHDC1	0.201888	0.184297	-0.0997948	0.172694	20	No
PIGZ	1.07164	0.907652	-0.0418294	0.0924574	20	No
PIGY	0.127021	0.550388	-0.100134	0.139446	20	No
PIGX	4.19681	0.68013	-0.30645	0.168067	20	No
PIGW	3.96838	0.755998	-0.177932	0.132926	20	No
TMEM30B	0.034029	0.023153	0.0825845	0.097787	20	No
SRPX	0.340795	0.77105	-0.121816	0.12477	17	No
TMEM30A	5.1849	0.499116	-0.313349	0.221326	20	No
PIGV	3.22264	0.809896	-0.174594	0.188936	20	No
PIGU	4.89647	0.348466	-0.133539	0.156257	20	No
PIGT	6.58166	0.596982	-0.168331	0.111928	20	No
PIGS	5.89204	0.52958	-0.314238	0.134332	20	No
PIGR	0.0879886	0.143102	0.0883703	0.140606	20	No
PIGQ	4.47756	0.864939	-0.104987	0.0801204	20	No
PIGP	4.28065	0.566274	-0.126819	0.127658	20	No
PIGO	4.65542	0.465755	-0.311292	0.164277	20	No
PIGN	4.03099	0.831843	-0.0443902	0.136141	20	No
PIGM	3.3946	0.899383	-0.226024	0.159098	20	No
PIGL	4.42948	0.958929	-0.0916838	0.137037	20	No
PIGK	4.33397	0.81502	0.102369	0.150214	20	No
PIGH	3.63467	1.38228	-0.380762	0.142233	20	No
AIF1L	0.838898	1.38227	-0.218774	0.162009	20	No
PIGG	4.53918	0.718243	0.0653364	0.112449	20	No
HMHB1	0.0410265	0.0910605	0.307929	0.0940861	20	No
PIGF	4.38644	0.586362	0.123726	0.110052	20	No
HAP1	0.221216	0.346919	-0.215976	0.105002	20	No
PIGC	4.9736	0.605941	-0.0108411	0.148708	20	No
PIGB	3.43236	0.492023	-0.237531	0.150443	20	No
PIGA	2.92934	0.379288	0.281918	0.0848275	17	No
SRP9	7.59965	0.605103	-0.74999	0.263586	20	No
SS18	5.65716	0.401095	-0.106336	0.225904	20	No
PIFO	0.128357	0.112831	-0.201597	0.168935	20	No
SLC5A12	0.112477	0.152864	0.155463	0.144586	20	No
UGT8	1.5855	1.1941	0.0162885	0.107704	20	No
SLC5A11	0.252282	0.321834	-0.035299	0.11825	20	No
SLC5A10	0.0712398	0.073051	-0.0322147	0.134976	20	No
HAO2	0.018887	0.0361354	-0.279246	0.158111	20	No
HAO1	0.00555157	0.0241987	-0.0151826	0.110413	20	No
ZFAT	2.88336	1.16134	-0.240539	0.27081	20	No
PIF1	4.6963	0.822368	-0.130338	0.17044	20	No
NDFIP2	3.67899	0.843132	0.0195848	0.115906	20	No
FLII	6.92708	0.477793	-0.467736	0.204543	20	No
NDFIP1	4.67148	1.15417	0.0721786	0.127249	20	No
HAMP	0.0646968	0.0794514	-0.863108	0.229614	20	No
FGFBP3	1.02633	0.569509	-0.204497	0.167388	20	No
FGFBP2	0.0311093	0.0530164	0.0671925	0.0954562	20	No
FGFBP1	0.210864	0.198335	0.0568037	0.128113	20	No
H1FOO	0	0	-0.220525	0.12365	20	No
SGF29	3.92049	0.493352	-1.00631	0.15162	20	No
FLI1	4.70435	0.829165	-0.224064	0.342592	20	No
SRMS	0.091344	0.251781	0.045929	0.161144	20	No
AMZ2	5.91253	0.313377	0.181334	0.107158	20	No
AMZ1	0.600588	0.991757	-0.137546	0.129254	20	No
H1FNT	0.095945	0.200962	-0.18338	0.11168	20	No
VASH2	1.45804	1.07541	-0.0216992	0.134944	20	No
VASH1	0.441398	0.426071	-0.0533405	0.160765	20	No
SHROOM4	0.0355803	0.0765306	0.014919	0.129148	17	No
SHROOM3	3.03945	1.46313	-0.0297455	0.136398	20	No
SHROOM2	0.182392	0.279246	0.0223694	0.187117	17	No
SHROOM1	1.91904	0.798443	-0.0465204	0.116403	20	No
ROBO4	0.0113866	0.01767	0.158151	0.174221	20	No
ROBO3	1.45194	1.30733	0.0328753	0.130513	20	No
ROBO2	0.536543	0.895637	-0.0287475	0.109493	20	No
ROBO1	3.74171	1.65565	-0.000657704	0.148977	20	No
PID1	0.0582835	0.0703619	0.10076	0.141477	20	No
ETNK2	0.161573	0.128099	-0.0567938	0.158326	20	No
ETNK1	4.2269	0.755433	0.013901	0.130097	20	No
SPECC1L	3.69848	0.650128	-0.0395106	0.155982	20	No
ERCC6L2	2.96005	0.622079	-0.0531054	0.121998	20	No
FLG2	0.0142669	0.0471239	-0.135612	0.155193	20	No
CRCT1	0	0	0.0803147	0.16582	20	No
UGP2	5.64947	0.436243	-0.489679	0.159879	20	No
NUP188	5.06123	0.620825	-0.262191	0.190547	20	No
N6AMT1	2.56999	0.45465	-0.814775	0.225607	20	No
ITFG2	4.45471	0.615167	0.0603615	0.198103	20	No
ITFG1	4.64111	0.724403	0.0972872	0.113198	20	No
REEP6	1.09158	0.792704	-0.158223	0.186803	20	No
REEP5	5.65103	0.569834	0.0502284	0.128321	20	No
REEP4	5.04449	0.812006	-0.122714	0.374198	20	No
REEP3	2.75436	0.707717	0.129915	0.089637	20	No
REEP2	1.28792	1.27723	-0.239741	0.112974	20	No
REEP1	1.07171	1.1149	-0.339117	0.134583	20	No
TBXA2R	0.117727	0.163067	-0.0249546	0.137524	20	No
SLC27A6	0.171009	0.681018	-0.0431618	0.0785159	20	No
CASD1	3.34834	0.544004	0.0713782	0.13576	20	No
SLC27A5	4.27549	1.55311	-0.20627	0.136407	20	No
SLC27A4	3.89629	0.573099	0.0578753	0.121788	20	No
SLC27A3	2.51543	1.02888	-0.00277207	0.0952518	20	No
SLC27A2	1.4071	1.25683	-0.251255	0.161697	20	No
SLC27A1	1.62764	0.598284	0.0136848	0.124361	20	No
TDRD12	0.30357	1.0607	0.0741069	0.0910965	20	No
TDRD10	0.0661914	0.22893	-0.106791	0.151425	20	No
NUP160	4.81518	0.646357	-0.945237	0.142275	20	No
FLCN	4.55053	1.09365	-0.272262	0.24779	20	No
CASC4	5.19072	0.866933	0.0196121	0.185051	20	No
CASC3	5.69097	0.40355	-0.580389	0.234276	20	No
CASC1	0.127968	0.100749	0.0968206	0.103653	20	No
AMTN	0.0118606	0.0315108	0.00599505	0.119896	20	No
MROH2B	0	0	0.183156	0.12936	20	No
DCUN1D5	5.72376	1.30244	0.137916	0.157998	20	No
HAGH	5.64334	1.01893	-0.188606	0.12853	20	No
DCUN1D4	3.98131	0.606745	0.0170805	0.179199	20	No
DCUN1D3	1.62783	0.538017	0.147382	0.151237	20	No
DCUN1D2	3.49945	0.570489	0.102765	0.115267	20	No
NUP155	4.02188	0.57148	-0.800943	0.166658	20	No
DCUN1D1	3.85563	0.721133	-0.0808394	0.163081	20	No
SLC7A6OS	4.0304	0.512891	-1.43923	0.343147	20	No
CBY3	0.775421	0.575273	-0.120318	0.0851071	20	No
NUP153	4.88589	0.573129	-0.620389	0.230582	20	No
CBY1	3.80332	0.716807	-0.0286778	0.106185	20	No
NEMP2	2.98927	0.5387	-0.0903664	0.17391	20	No
NEMP1	5.13004	0.691822	-0.0224905	0.113861	20	No
SRGN	7.991	1.07658	-0.0317955	0.127671	20	No
ZNF385D	0.0534091	0.08261	0.219752	0.106868	20	No
ZNF385B	0.371111	0.469519	0.183983	0.0755671	20	No
XYLT2	3.49166	0.462387	-0.344849	0.213996	20	No
ZNF385A	0.731007	0.948894	-0.156568	0.0919843	20	No
XYLT1	2.27572	1.68546	0.0580994	0.124903	20	No
CBX8	2.61937	0.684432	0.118071	0.128337	20	No
CBX7	3.67178	0.749931	-0.158138	0.165126	20	No
CBX6	4.59615	0.704201	0.0255556	0.0958306	20	No
CBX5	5.01826	0.831906	-0.110701	0.148687	20	No
CBX4	5.35373	1.17716	0.126915	0.149289	20	No
CBX3	7.63396	0.760366	-0.0171136	0.143105	20	No
CBX2	3.3993	0.980847	0.046545	0.124542	20	No
ELFN2	0.366169	0.78871	-0.0196601	0.136441	20	No
CBX1	5.74796	0.650203	-0.599663	0.175849	20	No
ELFN1	0.343675	0.430201	-0.104015	0.0979703	20	No
ARHGAP9	3.63114	1.53552	-0.301803	0.118794	20	No
ARHGAP8	0.653086	1.04334	-0.017353	0.110791	20	No
ARHGAP6	1.32433	1.62627	0.196102	0.139353	17	No
ARHGAP5	3.10632	0.741218	-0.154889	0.158508	20	No
ARHGAP4	6.8095	0.550649	0.098095	0.17492	17	No
ARHGAP1	4.76586	0.50535	-0.283183	0.227427	20	No
HLA-DRA	6.96549	3.64669	-0.084505	0.201795	20	No
NUP133	4.13445	0.606608	-1.4611	0.216606	20	No
COMMD10	3.91423	0.447421	-0.15231	0.102831	20	No
HADH	5.53989	0.630506	-0.1433	0.104808	20	No
MALSU1	5.40128	0.717337	-0.321626	0.164246	20	No
XPR1	3.63442	0.724418	-0.255455	0.262752	20	No
AMPH	0.323215	0.562946	-0.0523275	0.114826	20	No
AMOT	0.7691	1.12265	0.109746	0.126638	17	No
PHYH	3.37508	1.11219	0.0265545	0.105649	20	No
HAUS8	4.16908	0.600626	-0.703416	0.13291	20	No
HAUS7	4.94274	0.795407	-1.39081	0.193516	17	No
HAUS6	3.53834	0.548421	-1.15566	0.180687	20	No
HAUS5	4.27496	0.618112	-1.43061	0.200888	20	No
NT5M	1.91874	0.665122	-0.0487847	0.192232	20	No
HAUS4	5.11126	0.605496	-1.05903	0.212693	20	No
HAUS3	3.80857	0.546985	-0.984454	0.166689	20	No
HAUS2	4.61101	0.670994	-0.245569	0.0988877	20	No
HAUS1	5.26294	0.639308	-1.44027	0.20358	20	No
NUP107	5.76754	0.622494	-0.829417	0.185503	20	No
HLA-DOB	2.35749	1.2208	-0.0458533	0.0862575	20	No
HLA-DOA	1.39016	1.77687	0.0559632	0.155811	20	No
NT5E	1.28544	1.13033	-0.0529046	0.0996012	20	No
NT5C	4.89559	0.543378	-0.212986	0.138071	20	No
CBSL	2.56439	2.49379	-0.0422275	0.10557	20	No
LAMP5	2.79807	2.71782	0.238714	0.137897	20	No
LAMP3	1.07333	1.17085	-0.0489237	0.122547	20	No
BAHD1	3.7923	0.497255	-0.190112	0.121324	20	No
LAMP2	5.99276	0.778096	0.256357	0.138787	17	No
LAMP1	6.13544	0.567434	0.203895	0.118145	20	No
HAAO	0.316822	1.05233	-0.257077	0.130002	20	No
XPOT	6.49037	0.752406	-0.295176	0.161386	20	No
AMN1	2.13961	0.445368	0.107297	0.0855416	20	No
XPO7	4.74492	0.582146	-0.100021	0.204732	20	No
XPO6	6.37011	0.520414	-0.0273747	0.160722	20	No
XPO5	5.20924	0.520602	-1.03471	0.195759	20	No
XPO4	3.12221	0.73666	-0.32078	0.173427	20	No
UNC5CL	1.02031	0.62721	-0.0773183	0.116783	20	No
CPNE9	0.117019	0.0972043	0.00627335	0.104401	20	No
XPO1	6.22708	0.54223	-1.74225	0.203235	20	No
CPNE8	2.19536	1.23741	0.111355	0.0974743	20	No
CPNE7	2.35853	2.46232	-0.628984	0.125535	20	No
CPNE6	0.252191	0.420653	-0.306636	0.180392	20	No
CPNE5	2.39054	2.38392	-0.243704	0.123402	20	No
HLA-DMB	2.63177	2.00414	0.039011	0.141464	20	No
CPNE4	0.330214	0.403986	0.0544342	0.132383	20	No
HLA-DMA	4.50093	1.71583	-0.169267	0.131647	20	No
CPNE3	4.63517	1.16454	-0.0964776	0.153208	20	No
CBR4	3.29418	0.608923	-0.0117582	0.144516	20	No
CPNE2	2.19388	1.2508	-0.117328	0.105527	20	No
CBR3	1.15628	1.4792	-0.0622337	0.144856	20	No
CPNE1	6.77743	0.679413	-0.0251306	0.1651	20	No
CBR1	4.83405	0.957217	0.0727936	0.131197	20	No
SRA1	4.70296	0.514459	0.0842851	0.133277	20	No
NRSN2	3.14258	1.57515	0.130181	0.113116	20	No
NRSN1	0.00636945	0.0175611	0.148241	0.0768861	20	No
RHNO1	4.66484	0.676479	0.00950799	0.0952549	20	No
UGDH	3.97569	0.699107	-0.220295	0.222429	20	No
ZER1	4.02406	0.604194	-0.206374	0.19158	20	No
UGCG	2.91794	0.668576	-0.125466	0.10789	20	No
SEC61A2	2.49199	0.656218	-0.0554581	0.136757	20	No
SEC61A1	8.00026	0.625663	-1.52918	0.155722	20	No
COL17A1	0.159596	0.0953861	-0.32345	0.118106	20	No
HMGN5	5.12493	1.30394	0.132219	0.122276	17	No
HMGN4	6.42062	0.493604	0.226412	0.134755	20	No
HMGN3	6.87521	0.764483	-0.219172	0.152201	20	No
HMGN2	9.35503	0.736162	-0.850897	0.17309	20	No
HMGN1	7.92556	0.549585	-0.166707	0.118479	20	No
CDK5R2	0.0960618	0.170809	0.167024	0.105131	20	No
CDK5R1	1.18237	0.591368	0.182473	0.165893	20	No
NSMF	4.03714	1.05204	-0.174203	0.0695021	20	No
CBLC	0.0823697	0.117505	-0.134954	0.108609	20	No
CBLB	1.90655	1.17259	0.0968482	0.0794518	20	No
FKBP1B	0.326999	0.345294	0.176607	0.105243	20	No
FKBP1A	7.28073	0.63259	-0.228584	0.217122	20	No
FKTN	2.85675	0.672992	0.0545294	0.190452	20	No
FKBP15	3.84664	0.400085	0.0565947	0.178305	20	No
FKBP14	3.50443	0.710513	0.168246	0.112081	20	No
FKBP11	7.23809	0.940366	-0.120739	0.0899525	20	No
GPRIN3	3.20951	1.58232	-0.16866	0.156809	20	No
FKBP10	1.73816	1.20842	-0.151987	0.138828	20	No
GPRIN2	0.00644574	0.0095703	-0.264566	0.163231	20	No
GPRIN1	1.82769	1.03348	-0.109378	0.180921	20	No
AMFR	4.73491	0.616004	-0.342528	0.186741	20	No
NSL1	4.8176	0.751602	-0.681024	0.24424	20	No
NTHL1	5.00418	0.655584	-0.161594	0.214495	20	No
PI16	0.0153815	0.0336011	-0.0519443	0.143438	20	No
PI15	0.845401	0.945062	-0.0634318	0.168549	20	No
CARS2	4.88898	0.524018	-0.43898	0.221097	20	No
VARS2	4.70797	0.784803	-0.673887	0.259754	20	No
TRMT61B	3.92012	0.540324	-0.182157	0.165089	20	No
TRMT61A	3.19206	0.695526	-0.431385	0.26186	20	No
FKRP	3.52435	0.689338	-0.051532	0.125478	20	No
TMEM273	1.1699	1.46809	-0.015456	0.130869	20	No
DBNDD2	0.938708	0.526265	0.27754	0.1345	20	No
GNPTG	4.89452	0.564178	-0.0571661	0.12986	20	No
DBNDD1	1.05541	1.14628	-0.137432	0.132307	20	No
TMEM270	0.102549	0.226096	-0.16865	0.183446	20	No
MCMBP	5.35233	0.74559	-0.646756	0.189225	20	No
DEGS2	0.20089	0.391918	0.15335	0.138508	20	No
BUB1B	5.56827	0.761405	-1.35921	0.195085	20	No
DEGS1	5.13976	0.646724	0.217304	0.151273	20	No
TMEM268	4.51309	0.605373	0.108595	0.123574	20	No
TMEM267	3.83646	0.740224	0.313002	0.0921866	20	No
TMEM266	0.527433	0.53875	0.0123565	0.16657	20	No
TMEM263	3.81578	0.696397	0.0288757	0.111665	20	No
TMEM262	0.685866	0.256643	0.07304	0.0939709	20	No
TMEM260	2.93685	0.61025	-0.12298	0.128376	20	No
AMD1	5.16912	0.593706	-0.394158	0.32773	20	No
TMEM259	7.00067	0.416139	-0.0960122	0.168042	20	No
TMEM258	8.76435	0.505392	-0.90235	0.138014	20	No
FIGLA	0	0	-0.00983856	0.134491	20	No
TMEM256	5.60614	1.39949	-0.103248	0.11884	20	No
TMEM254	3.8573	0.821766	-0.198031	0.126379	20	No
TMEM253	0.221643	0.193976	0.0503584	0.16097	20	No
PRICKLE4	0.621231	0.410425	-0.0303474	0.108548	20	No
TMEM252	0.0230256	0.0406506	0.085061	0.132859	20	No
TMEM251	4.13102	0.713774	-0.104518	0.199255	20	No
PRICKLE3	3.07635	0.515781	0.0111499	0.112359	17	No
DVL3	4.96746	0.504498	-0.165532	0.152354	20	No
TMEM250	3.70658	0.572681	0.172658	0.130344	20	No
PRICKLE2	1.03098	0.710812	-0.0997103	0.111712	20	No
AMBP	0.15213	0.144787	0.00113919	0.165169	20	No
DVL2	4.35267	0.585141	0.0138305	0.113044	20	No
PRICKLE1	1.40518	0.852643	-0.117364	0.121877	20	No
DVL1	4.56903	0.549249	-0.166447	0.144889	20	No
AMBN	0.195491	0.240694	-0.065992	0.116863	20	No
CYSRT1	0.750495	0.594948	-0.0893468	0.142139	20	No
DPY30	6.3658	0.341147	-0.372707	0.186962	20	No
NADSYN1	5.31683	0.440229	0.00311577	0.135432	20	No
PLVAP	0.114235	0.162783	-0.036857	0.164057	20	No
PRPF4B	5.17639	0.403729	-0.361971	0.117019	20	No
TMEM249	0.553106	0.358925	-0.0158182	0.160889	20	No
TMEM248	5.28536	0.461928	0.0740171	0.110407	20	No
TMEM247	0.196589	0.500085	-0.1872	0.136049	20	No
TMEM246	0.204895	0.682558	0.250814	0.106391	20	No
TMEM245	3.84125	0.572637	0.0492446	0.211664	20	No
TMEM244	0.048527	0.0836764	0.194092	0.0679821	20	No
TMEM243	5.3294	0.611345	0.0716495	0.134672	20	No
TMEM242	2.44959	0.450951	-0.306542	0.151624	20	No
TMEM241	3.42301	0.780377	0.328808	0.124814	20	No
CBFB	5.51122	0.725797	-0.899776	0.337448	20	No
LAMC3	0.296186	0.5645	-0.0892948	0.121076	20	No
TMEM240	0.433367	0.303756	-0.441911	0.14193	20	No
LAMC2	0.248898	0.0967585	-0.273208	0.124698	20	No
LAMC1	3.72211	1.71779	0.0361709	0.112421	20	No
NKX3-2	0.629486	0.715888	0.234981	0.0734739	20	No
NKX3-1	0.0908187	0.128795	0.0714647	0.090941	20	No
NSG2	0.911509	1.03714	0.00974785	0.120316	20	No
PHKB	4.76353	0.621372	-0.06818	0.165977	20	No
NSG1	0.468804	0.95728	0.0764534	0.124717	20	No
ASB18	0	0	0.0659733	0.118439	20	No
PRPF39	4.07852	0.431717	-0.582046	0.204967	20	No
ASB17	0.00142846	0.0062265	-0.0322216	0.145912	20	No
TMEM239	0.00284998	0.00964926	-0.0805742	0.1338	20	No
CYP4F22	0.00789541	0.00714167	-0.0873263	0.146444	20	No
ASB16	2.03889	0.944839	-0.255701	0.19177	20	No
TMEM238	1.58817	0.536391	0.0239523	0.142782	20	No
ASB15	0.0358165	0.0726246	0.322083	0.130601	20	No
TMEM237	3.83	0.690068	0.0825424	0.0976203	20	No
ASB14	0.36541	0.150995	0.0868191	0.139776	20	No
TMEM236	0.135363	0.278398	0.210617	0.106914	20	No
ASAP3	0.662153	0.695038	-0.144459	0.108664	20	No
ASB13	2.98041	1.19917	0.172738	0.11056	20	No
TMEM235	0.00214622	0.00681962	-0.191152	0.133816	20	No
ASAP2	0.876605	1.03955	0.150944	0.153355	20	No
ASB12	0.173461	0.124768	0.0269568	0.132511	17	No
TMEM234	2.70349	0.583667	0.14065	0.153983	20	No
ASAP1	3.80625	0.869161	0.114328	0.110619	20	No
ASB11	0.0182831	0.0540134	0.251633	0.118516	17	No
TMEM233	0.00571397	0.0114017	0.0465428	0.100453	20	No
ASB10	0.00143553	0.00430659	-0.0245187	0.172295	20	No
PRPF31	5.99619	0.569	-1.64672	0.172626	20	No
TMEM232	1.03829	0.576459	0.112289	0.163538	20	No
LAMB4	0.0654285	0.116482	-0.0120889	0.115338	20	No
TMEM231	2.63813	0.736771	0.203372	0.124976	20	No
LAMB3	1.05052	1.05092	-0.190944	0.124585	20	No
TMEM230	6.62631	0.519629	-0.286822	0.220176	20	No
LAMB2	1.23579	0.845236	-0.0338645	0.130594	20	No
LAMB1	1.58895	0.916253	0.0261344	0.133621	20	No
TMEM151B	0.26881	0.15473	-0.100286	0.140195	20	No
TMEM151A	0.0389716	0.049553	-0.00716489	0.140669	20	No
PHIP	3.76129	0.642474	-0.172473	0.246167	20	No
CYP4F12	0.328272	0.625743	-0.0235786	0.08207	20	No
CYP4F11	0.634007	1.01556	-0.515483	0.175845	20	No
CARM1	5.22882	0.50886	-0.772849	0.274982	20	No
TMEM225	0	0	0.0654924	0.158945	20	No
HMGCR	5.01261	0.587003	-0.837927	0.262513	20	No
TMEM223	4.43747	0.62988	-0.151656	0.223911	20	No
LAMA5	4.07998	1.4466	0.13061	0.119257	20	No
TMEM222	4.75753	0.675146	0.072546	0.113143	20	No
LAMA4	0.264287	0.50902	0.0706577	0.0811526	20	No
TMEM221	0.10955	0.146759	0.063607	0.14648	20	No
LAMA3	0.408253	0.442226	-0.0056321	0.133021	20	No
TMEM220	0.493886	0.488326	0.0193434	0.0999052	20	No
LAMA2	0.222357	0.230721	0.0212736	0.1605	20	No
LAMA1	0.0490126	0.0420433	0.0798392	0.133487	20	No
HMGCL	4.37783	0.729922	-0.147719	0.131029	20	No
ERLIN2	4.12918	0.816304	-0.00214109	0.163363	20	No
ERLIN1	4.16827	0.59133	-0.146646	0.126869	20	No
ZFHX4	0.54908	0.902517	-0.213927	0.125749	20	No
ZFHX3	0.88895	0.648405	0.0286798	0.107583	20	No
ZFHX2	0.283238	0.493119	-0.0710351	0.117934	20	No
TMEM150C	0.159321	0.465875	-0.0663765	0.112136	20	No
TMEM150B	0.413007	0.495024	0.0985827	0.109315	20	No
TMEM150A	3.20101	0.879913	0.0981234	0.152182	20	No
PRPF19	7.08415	0.650396	-1.83672	0.151836	20	No
PRPF18	4.19825	0.617437	-0.561934	0.242247	20	No
TMEM219	5.79539	0.490897	-0.0452924	0.0960222	20	No
TMEM218	5.04114	0.616001	0.0196811	0.124128	20	No
TMEM217	0.490958	0.320292	0.00141018	0.123791	20	No
TMEM216	4.14033	0.518445	0.0782669	0.167363	20	No
TMEM215	0.0391989	0.138942	-0.131178	0.141909	20	No
TMEM214	5.90397	0.536162	-0.073539	0.15989	20	No
TMEM213	0.0206849	0.0469888	0.140936	0.0810305	20	No
TMEM212	0.175295	0.704885	0.1442	0.103082	20	No
TMEM211	0.00356067	0.0109114	0.0281371	0.13227	20	No
TMEM210	0.298756	0.772114	-0.0312336	0.102399	20	No
NSD3	4.79156	0.677622	0.0488684	0.180167	20	No
NSD2	6.43757	1.18679	-0.139271	0.129488	20	No
NSD1	3.6351	0.67748	-0.306559	0.172522	20	No
PSIP1	5.72506	0.574165	-0.10417	0.181857	20	No
TMEM209	4.55788	0.702023	-0.0966135	0.106621	20	No
TMEM208	6.56282	0.662958	-0.363211	0.198679	20	No
TMEM207	0.107836	0.258454	0.170349	0.0708469	20	No
TMEM206	3.12401	0.559157	0.0315408	0.114301	20	No
RCOR3	5.07994	0.503811	-0.076178	0.237796	20	No
TMEM205	6.9391	0.697365	-0.221422	0.134229	20	No
HMGB4	0.00214622	0.00681962	0.110576	0.119978	20	No
RCOR2	0.877905	1.01374	-0.352394	0.168463	20	No
TMEM204	0.150546	0.128002	-0.130075	0.148024	20	No
HMGB3	6.2071	0.747804	-0.309435	0.128147	17	No
RCOR1	2.91122	0.487678	-0.651988	0.168121	20	No
TMEM203	5.01769	0.413774	0.259359	0.140072	20	No
HMGB2	9.0102	0.833358	0.108773	0.138894	20	No
TMEM202	0.00420321	0.0183214	0.0547495	0.115497	20	No
HMGB1	8.80658	0.729946	-0.528387	0.14466	20	No
TMEM201	3.12967	0.729082	-0.222135	0.183731	20	No
HNRNPU	8.23743	0.681178	-1.23979	0.305077	20	No
HNRNPR	7.04387	0.600898	-0.519751	0.206426	20	No
GPER1	0.166088	0.256179	0.155415	0.121048	20	No
HNRNPM	7.97713	0.673798	-1.10207	0.191011	20	No
HNRNPL	8.13327	0.512414	-0.976289	0.152162	20	No
HNRNPK	8.90076	0.428725	-1.80192	0.148792	20	No
HNRNPF	7.38324	0.73563	-0.177595	0.215492	20	No
HNRNPD	7.98235	0.662683	-0.399592	0.171901	20	No
SQOR	3.90063	1.04756	-0.0935048	0.134683	20	No
HNRNPC	8.99981	0.417822	-0.904172	0.149882	20	No
DUOXA2	0.0210656	0.0343721	-0.264068	0.13217	20	No
DUOXA1	0.151681	0.251122	-0.10264	0.140052	20	No
PILRB	5.1831	0.569477	-0.0635301	0.133833	20	No
PILRA	1.60769	0.87685	-0.0493004	0.149053	20	No
HMGA2	0.498769	1.09153	-0.0185555	0.146133	20	No
HMGA1	7.62957	0.911202	-0.639432	0.157413	20	No
PHEX	0.0633018	0.0791208	0.0579	0.122142	17	No
PHF8	4.09572	0.406329	-0.26917	0.157489	17	No
PHF7	3.94143	0.71624	-0.121832	0.113689	20	No
PHF6	4.20692	0.71753	-0.0523737	0.307253	17	No
PHF3	3.96531	0.500522	0.0235384	0.156991	20	No
PHF2	3.19588	0.978716	-0.109241	0.130907	20	No
PHF1	4.83647	0.512088	-0.112417	0.127862	20	No
ZEB2	0.973556	1.28944	-0.184517	0.14169	20	No
ZEB1	3.02095	0.591418	-0.431591	0.301438	20	No
PARPBP	3.88799	0.724539	-0.148335	0.108699	20	No
NSA2	7.09382	0.548968	-0.930144	0.205242	20	No
SPINK14	0	0	-0.0774844	0.178404	20	No
SPINK13	0.16991	0.250263	-0.0359163	0.0959969	20	No
YLPM1	4.73559	0.640837	-0.283785	0.181024	20	No
SQLE	5.51858	0.856829	-0.268519	0.223618	20	No
ITPA	5.72051	0.576342	-0.118462	0.238656	20	No
LPGAT1	2.60524	1.02888	-0.0824588	0.158455	20	No
KRTAP6-2	0.0119393	0.0520424	0.0443316	0.100749	20	No
KRTAP6-1	0.0217575	0.0564332	0.0614673	0.114778	20	No
PHC3	4.33099	0.734823	0.115445	0.158358	20	No
PHC2	4.08542	0.447508	-0.116499	0.178785	20	No
PHC1	2.4613	1.16814	-0.27431	0.175464	20	No
ASAH2	0.839161	0.714427	0.118391	0.152785	20	No
ASAH1	5.85979	0.657272	0.0310455	0.217372	20	No
ALX4	0.0844604	0.172996	-0.138463	0.129425	20	No
ALX3	0.0120019	0.0244095	-0.365192	0.147772	20	No
IBA57	2.0442	0.715414	-0.344313	0.239481	20	No
ALX1	0.235016	0.6323	-0.0977813	0.142813	20	No
RSPRY1	3.95014	0.589497	-0.0817454	0.163141	20	No
PHAX	5.04097	0.960625	-0.791757	0.158624	20	No
GFI1B	0.196707	0.527192	-0.0898775	0.131688	20	No
PHB2	7.82102	0.80517	-1.26055	0.185326	20	No
STK40	4.61268	0.567541	-0.321085	0.197779	20	No
C20orf96	3.27389	0.615153	0.0794502	0.151866	20	No
CARD9	0.717724	0.493023	0.0479525	0.097416	20	No
CARD8	4.34161	0.684361	-0.102488	0.10767	20	No
STK39	2.73228	1.29848	-0.19288	0.135302	20	No
STK38	4.24074	0.616565	0.133317	0.0770705	20	No
CARD6	0.695597	0.762552	-0.0736313	0.103436	20	No
STK36	3.73955	0.826096	-0.0655192	0.126975	20	No
SLC26A9	0.0952144	0.239187	-0.038442	0.184319	20	No
STK35	2.99838	0.472224	-0.101586	0.162068	20	No
SLC26A8	0.0523893	0.0631515	-0.399458	0.110583	20	No
SLC26A7	0.217009	0.269517	-0.0483808	0.155118	20	No
STK33	3.41453	1.09593	0.234055	0.0648803	20	No
SLC26A6	4.0668	0.54982	0.0476407	0.128316	20	No
ALMS1	3.59138	0.532562	0.0265785	0.13002	20	No
SLC26A5	0.131746	0.250787	-0.103577	0.113954	20	No
STK31	0.311264	0.87263	0.122095	0.175328	20	No
SLC26A4	0.136938	0.189776	0.0558579	0.0819857	20	No
SLC26A3	0.0247266	0.029447	0.113863	0.141807	20	No
SLC26A2	2.13957	0.545656	0.113545	0.144862	20	No
SLC26A1	0.521423	0.713291	-0.0442287	0.124764	20	No
C20orf85	0.00701276	0.0227627	0.0409185	0.119796	20	No
METRNL	1.4105	1.2445	-0.054649	0.139961	20	No
STK26	4.43417	0.746308	0.173897	0.104418	17	No
STK25	5.84514	0.801024	-0.0194445	0.136635	20	No
STK24	5.40841	0.668672	0.145447	0.136215	20	No
UFM1	5.57892	0.651971	-1.32546	0.300191	20	No
CASP14	0.0107383	0.0109299	-0.042533	0.0959167	20	No
CASP10	4.24422	0.80158	-0.152902	0.184788	20	No
STK19	4.28163	0.664457	-0.0892079	0.130931	20	No
STK16	4.85702	0.443117	-0.0388527	0.0939133	20	No
STK11	5.32189	0.402148	-0.675204	0.257124	20	No
STK10	4.66459	0.793799	0.122695	0.168413	20	No
UFL1	4.25687	0.477785	-0.822001	0.246449	20	No
TSACC	1.42354	0.663314	-0.330546	0.166215	20	No
MPPED2	1.28156	1.58894	0.0186758	0.0906828	20	No
MPPED1	0.0134188	0.0250976	-0.177031	0.203328	20	No
CHERP	5.31478	0.460537	-1.26211	0.206597	20	No
ALS2	3.37378	0.863967	0.138262	0.109486	20	No
RNASEH2C	5.3097	0.512369	-0.440333	0.263202	20	No
RNASEH2B	5.63154	0.616809	-0.179284	0.170625	20	No
RNASEH2A	5.65083	0.718254	-0.409797	0.175619	20	No
MYADML2	0.258461	0.32119	0.15905	0.118358	20	No
MCM10	4.12423	1.09183	-0.304981	0.179158	20	No
SFT2D3	0.187526	0.43988	-0.0955903	0.138348	20	No
CAV3	0.0941926	0.122329	0.045071	0.11307	20	No
SFT2D2	3.58208	0.753736	-0.0690916	0.156463	20	No
CAV2	2.8985	1.91115	-0.0685927	0.150444	20	No
SFT2D1	5.51735	0.686903	-0.012462	0.0951204	20	No
CAV1	4.05502	1.80515	0.0217815	0.126097	20	No
GNPAT	4.85902	0.57967	-0.1201	0.100361	20	No
ALPP	0.0934514	0.0645249	0.118995	0.212109	20	No
ALPL	0.0253075	0.0349748	-0.0196894	0.1092	20	No
ALPI	0.00143553	0.00430659	0.00892306	0.189098	20	No
ALPG	0.0346921	0.0255813	-0.0126717	0.0857453	20	No
RASGEF1C	0.037977	0.0939598	0.0206493	0.12013	20	No
RASGEF1B	1.41581	1.23577	0.0851229	0.0918339	20	No
RASGEF1A	0.644355	0.948069	-0.0874585	0.135287	20	No
NELL2	1.22757	0.917437	-0.0853337	0.133783	20	No
NELL1	0.193302	0.506162	0.364035	0.119046	20	No
C20orf27	5.0564	0.74128	0.0730059	0.107099	20	No
NRTN	1.02891	0.675239	0.0614741	0.111943	20	No
SLC25A53	2.68633	0.508973	0.247513	0.0990032	17	No
SLC25A52	0.0646945	0.0501433	-0.0603576	0.097209	20	No
CAST	5.47599	0.782474	-0.284853	0.127581	20	No
SLC25A51	4.03431	0.415006	0.045862	0.170462	20	No
CASR	0.00357468	0.00889635	-0.0615014	0.12363	20	No
DUXA	0.0532565	0.138801	-0.0889969	0.139794	20	No
FAM171A2	0.718173	0.740589	-0.112829	0.141341	20	No
FAM171A1	3.05997	2.21919	0.123543	0.109313	20	No
CASK	2.85521	1.14765	0.185959	0.0952547	17	No
NRROS	4.3621	1.00399	-0.0765954	0.0883541	20	No
DUX4	0.0560821	0.0729178	-1.67471	0.305308	20	No
SLC25A48	0.106057	0.200686	-0.255958	0.184257	20	No
SLC25A47	0.0308527	0.0393107	0.0236616	0.139312	20	No
SLC25A46	5.33574	0.490826	-0.0664195	0.170586	20	No
SLC25A45	3.81555	0.64077	-0.044966	0.134532	20	No
SLC25A44	4.69925	0.729782	-0.181189	0.139202	20	No
SLC25A43	2.92086	0.856171	0.138145	0.10405	17	No
SLC25A42	3.96223	0.724651	-0.237806	0.154187	20	No
SLC25A41	0.405565	0.377321	-0.0864676	0.1239	20	No
CARS	6.19674	0.789827	-1.3943	0.185955	20	No
SLC25A40	4.10121	0.745387	0.0803889	0.148648	20	No
CUL4B	4.30214	0.543798	-0.161218	0.366413	17	No
CUL4A	4.95328	0.662374	-0.00230428	0.134259	20	No
PVRIG	1.37455	0.80359	-0.0127605	0.1474	20	No
CARF	2.22527	0.575049	-0.0473675	0.149294	20	No
SLC25A39	7.34942	0.55652	-0.19388	0.171095	20	No
SLC25A38	4.85888	0.468384	-0.161285	0.175413	20	No
SLC25A37	4.53626	0.712869	0.0446944	0.103717	20	No
SLC25A36	5.32599	0.626785	-0.127022	0.183308	20	No
SLC25A35	2.09205	0.610687	0.069768	0.138556	20	No
SLC25A34	0.566232	0.4964	-0.181174	0.122113	20	No
SLC25A33	2.618	0.625621	-0.154016	0.175922	20	No
SLC25A32	4.4653	0.728432	-0.0742374	0.167645	20	No
SLC25A31	0.0111097	0.0328893	-0.0269137	0.12643	20	No
SLC25A30	1.94964	0.937245	-0.0253262	0.131468	20	No
OVGP1	1.12792	0.628427	-0.280328	0.120498	20	No
HIST2H2BF	1.40525	0.829788	-0.552863	0.186967	20	No
HIST2H2BE	3.40826	1.32349	-0.635631	0.199351	20	No
SLC25A29	1.78761	1.37811	-0.161032	0.189856	20	No
SLC25A28	4.9047	0.503498	-0.287303	0.165446	20	No
SLC25A27	0.712371	0.818817	-0.0368917	0.0830841	20	No
SLC25A26	4.11003	0.472873	-0.537583	0.203264	20	No
SLC25A25	3.67722	0.764311	-0.243753	0.13765	20	No
SLC25A24	3.17521	1.06427	-0.141861	0.152908	20	No
OPALIN	0	0	0.0460152	0.149407	20	No
SLC25A23	4.7928	0.797109	0.00977309	0.107179	20	No
SLC25A22	4.3705	0.800701	-0.474523	0.238498	20	No
SLC25A21	0.32893	0.598913	0.163003	0.0955376	20	No
ALLC	0.00500328	0.0103494	-0.0477518	0.121207	20	No
CAPS	3.16103	0.875509	-0.277705	0.13796	20	No
SLC25A20	5.50282	1.0068	-0.124539	0.141529	20	No
CAPG	2.93937	1.44381	0.0373179	0.128102	20	No
ITCH	4.71657	0.686987	-0.0041375	0.125954	20	No
CELSR3	3.08749	1.29057	-0.0500833	0.103815	20	No
CELSR2	1.12713	1.1484	-0.0582535	0.159266	20	No
CELSR1	1.47036	1.73007	0.242931	0.124333	20	No
HIST2H2AC	2.0553	1.01253	-0.945032	0.309173	20	No
HIST2H2AB	0.354381	0.381406	-0.177878	0.214949	20	No
SLC25A19	4.95033	0.855487	-0.226458	0.166628	20	No
SLC25A18	0.287266	0.605421	-0.309576	0.114682	20	No
UFD1	6.20286	0.750978	-1.25818	0.206085	20	No
SLC25A17	4.45125	0.723155	-0.165558	0.150595	20	No
SLC25A16	3.52623	0.697895	-0.0270748	0.142964	20	No
SLC25A15	3.16705	0.68422	0.0195556	0.116909	20	No
SLC25A14	3.84808	0.652428	0.149388	0.0862471	17	No
SLC25A13	3.8036	0.72596	-0.130893	0.146272	20	No
SLC25A12	3.91769	0.563909	0.0159384	0.140127	20	No
SLC25A11	4.82115	0.675197	-0.196471	0.182028	20	No
SLC25A10	4.49232	1.08501	-0.599981	0.161003	20	No
CAP2	0.612367	0.832873	0.169464	0.102291	20	No
CAP1	7.0342	0.519764	-0.685226	0.254347	20	No
FSD1L	1.44072	0.9102	0.0771561	0.158439	20	No
CHEK2	4.45978	0.906511	0.0828643	0.146633	20	No
CHEK1	5.58161	0.876421	-1.68268	0.226083	20	No
TBPL2	0.00214622	0.00681962	-0.157924	0.177734	20	No
TBPL1	4.50345	0.573058	0.186631	0.0884764	20	No
NELFE	6.72007	0.666715	-0.676526	0.144463	20	No
NRP2	1.10851	1.47266	-0.194258	0.145114	20	No
NRP1	0.288479	0.174273	0.0766008	0.131804	20	No
NELFB	5.50273	0.502413	-1.74198	0.312045	20	No
NELFA	4.78818	0.637019	-0.965376	0.246935	20	No
UFC1	7.66123	0.540336	-0.279006	0.200769	20	No
CANX	9.12751	0.577075	-0.0174398	0.185454	20	No
VWA5A	1.76138	1.18533	0.211252	0.10844	20	No
COL16A1	0.431717	0.580183	0.0678182	0.15009	20	No
FJX1	1.16138	0.989852	-0.0593383	0.116855	20	No
PADI4	0.170957	0.421226	0.100375	0.135068	20	No
JAKMIP3	0.26249	0.423332	-0.117674	0.149262	20	No
PADI3	0.0537689	0.0963346	-0.0761567	0.115763	20	No
JAKMIP2	2.06332	1.41372	0.0515402	0.108122	20	No
PADI2	0.128716	0.242063	-0.0289221	0.0833944	20	No
JAKMIP1	2.01554	1.67641	0.0737678	0.1296	20	No
PADI1	0.048263	0.0751119	0.0710226	0.11452	20	No
KIF9	2.78825	0.517192	-0.0627163	0.119877	20	No
KIF7	0.856964	0.92807	-0.0322877	0.191471	20	No
KIF6	0.466757	0.560959	-0.29067	0.18582	20	No
DUS2	3.68767	0.889857	-0.139395	0.113185	20	No
CAMP	0.0187622	0.0406695	-0.065052	0.120299	20	No
PARP16	2.93426	0.593759	-0.208253	0.109777	20	No
PGS1	4.50629	0.59701	-0.992761	0.237978	20	No
PARP15	0.240637	0.671248	0.0497793	0.121221	20	No
PARP14	3.0314	1.37863	0.0551732	0.15373	20	No
PARP12	3.70755	1.09408	0.0230906	0.0683675	20	No
PARP11	2.1386	0.73993	-0.106104	0.10069	20	No
PARP10	4.88836	0.788888	-0.331426	0.170749	20	No
LITAF	5.77168	1.13503	-0.121029	0.145557	20	No
NRN1	0.925849	1.30284	-0.197326	0.111164	20	No
CALY	0.0797442	0.116833	0.19188	0.132667	20	No
VWA3B	0.00567916	0.0151348	0.144553	0.119701	20	No
VWA3A	0.159282	0.207224	-0.195947	0.122394	20	No
FSCN3	0.277658	0.167296	0.0175617	0.162671	20	No
CALU	6.50197	0.866415	0.119465	0.152012	20	No
FSCN2	0.658599	0.405467	-0.26308	0.1425	20	No
FSCN1	1.17639	1.60871	0.0292865	0.125355	20	No
CALR	9.47002	0.598972	-0.18936	0.129189	20	No
SPZ1	0.0155076	0.0280315	0.025711	0.133214	20	No
TMEM199	4.57631	0.577799	-0.973911	0.228396	20	No
TMEM198	2.1178	0.716335	-0.164153	0.148549	20	No
ALG9	4.71082	0.806724	-0.523447	0.278892	20	No
ALG8	5.83531	0.560111	-0.535593	0.223572	20	No
TMEM196	0.00284998	0.00964926	-0.0261364	0.0874853	20	No
ALG6	3.58971	0.587619	-0.435073	0.17608	20	No
ALG5	5.78837	0.689587	-0.422837	0.200895	20	No
TMEM192	3.97616	0.804088	0.0748191	0.0624491	20	No
ALG3	6.5796	0.512818	-0.339859	0.29582	20	No
ALG2	5.27619	0.655367	-1.46388	0.219682	20	No
TMEM190	0.0833024	0.0893838	-0.197241	0.136731	20	No
ALG1	4.686	0.818146	-1.08059	0.201408	20	No
MPRIP	6.14726	0.76471	0.0478383	0.138231	20	No
TMEM189	3.83361	0.652345	-0.184126	0.247616	20	No
SH3GL3	0.195024	0.342588	-0.241462	0.130506	20	No
SH3GL2	0.228188	0.374639	0.0451723	0.150746	20	No
TMEM187	2.8913	0.547705	-0.017015	0.10685	17	No
SH3GL1	4.40927	0.419748	-0.52283	0.386781	20	No
TMEM186	4.259	0.465993	-0.0801792	0.103128	20	No
TMEM182	2.66869	0.849462	0.0147329	0.0839544	20	No
FASTKD5	3.82518	0.610599	-0.618032	0.233228	20	No
TMEM181	2.93577	0.591658	0.105227	0.147814	20	No
FASTKD3	4.15165	0.57237	0.0990748	0.116512	20	No
FASTKD2	4.26222	0.623408	0.171139	0.112941	20	No
FASTKD1	5.10266	0.577023	-0.0381494	0.0927901	20	No
TMEM179	0.0566769	0.155576	-0.0329551	0.137375	20	No
TBC1D9	1.93958	1.16699	-0.0274111	0.141457	20	No
TMEM177	3.20213	0.573725	-0.224486	0.0908369	20	No
TBC1D8	1.46369	0.643256	-0.0637999	0.112608	20	No
TBC1D7	4.92368	0.708765	0.337871	0.175591	20	No
TMEM175	4.70003	0.717791	0.177439	0.087676	20	No
ELMSAN1	3.80621	0.946093	-0.100229	0.256863	20	No
TMEM174	0	0	-0.190478	0.169821	20	No
TBC1D5	4.0888	0.506058	-0.208041	0.141725	20	No
TMEM173	4.05359	1.4689	0.065814	0.0797102	20	No
TBC1D4	1.8697	1.2683	0.297737	0.121947	20	No
TBC1D3	0.143904	0.515433	-0.514428	0.115361	20	No
TMEM171	0.297534	0.606085	0.139745	0.142642	20	No
TBC1D2	0.638852	0.395127	0.12065	0.122943	20	No
TBC1D1	4.14511	1.29551	-0.0415492	0.128116	20	No
NUTM2G	0.477853	0.352306	-0.106738	0.164103	20	No
NUTM2F	0.0149263	0.0202546	0.00602526	0.130246	20	No
NUTM2B	0.605703	0.659799	-0.0567732	0.192622	20	No
TCP11X2	0.0226184	0.052749	-0.0244082	0.130985	17	No
NUTM2A	0.433198	0.318022	-0.203805	0.193764	20	No
TMEM169	0.59384	0.75558	-0.0803195	0.149423	20	No
TMEM168	4.11728	0.711624	0.169114	0.143268	20	No
TMEM165	5.2821	0.602722	-0.125984	0.21699	20	No
TMEM164	3.6975	0.832842	-0.0359396	0.153675	17	No
TMEM163	0.132056	0.169958	-0.0883555	0.128475	20	No
RFXAP	2.73127	0.633087	-0.116633	0.19167	20	No
FRA10AC1	3.4233	0.552719	0.1169	0.0993376	20	No
TMEM160	3.57372	1.07956	-0.0809502	0.178118	20	No
PGM5	0.58073	0.949635	-0.290603	0.201302	20	No
PGLS	4.42145	0.575789	-0.335867	0.195207	20	No
PGM3	4.36435	0.729606	-0.598493	0.270607	20	No
PGM2	3.7659	0.504665	0.00584512	0.138325	20	No
PGM1	4.25834	0.815752	-0.0198575	0.153789	20	No
TMEM159	2.32089	0.894425	0.087093	0.142669	20	No
MEAF6	5.54593	0.488992	-0.617087	0.262887	20	No
TMEM158	0.258204	0.206892	0.0108611	0.0818962	20	No
TMEM156	0.964594	1.51168	0.0120702	0.12597	20	No
TMEM155	0.00764486	0.0274816	0.184376	0.131716	20	No
TMEM154	1.35872	1.28603	-0.110902	0.106432	20	No
TNFSF13B	0.409122	0.434099	0.114111	0.149335	20	No
NRGN	2.31675	1.08031	0.0510663	0.150068	20	No
TMEM14C	6.36859	0.671789	0.0891358	0.142679	20	No
TMEM14B	6.38005	0.603026	-0.128754	0.110073	20	No
TMEM14A	4.58798	0.743325	0.119257	0.141464	20	No
PRIMPOL	3.44995	0.604548	0.033212	0.116442	20	No
IL31RA	0.0316988	0.0338319	-0.159804	0.164785	20	No
ISY1	4.70353	0.596606	-1.29909	0.160398	20	No
TMEM147	7.0335	0.490781	-0.241903	0.153388	20	No
TMEM145	0.509925	0.551967	0.0604534	0.163579	20	No
KLRK1	0.0439891	0.0768698	0.142006	0.118561	20	No
TMEM144	0.333256	0.563762	0.267161	0.107088	20	No
NKX2-8	0.0161228	0.0545991	-0.0892684	0.140908	20	No
TMEM143	3.35431	0.40295	-0.223758	0.0844209	20	No
TMEM141	5.61908	0.74862	-0.0755879	0.0941842	20	No
NKX2-5	0.227882	0.498231	-0.327533	0.137295	20	No
TMEM140	4.42238	0.81033	-0.0141163	0.100377	20	No
NKX2-4	0.00215329	0.00512586	0.114685	0.126723	20	No
NRG4	0.910742	0.77893	0.103739	0.180049	20	No
NKX2-3	0.134086	0.525724	-0.0542494	0.123401	20	No
NRG3	0.820129	1.07631	-0.0475359	0.189667	20	No
NKX2-2	0.00856422	0.0137612	0.244232	0.147302	20	No
NRG2	2.15454	1.49551	-0.0106419	0.110092	20	No
NKX2-1	0.300372	0.711214	0.180414	0.141522	20	No
NRG1	0.30398	0.312609	0.273825	0.10342	20	No
SPTB	1.08936	1.2665	-0.100887	0.132859	20	No
BTBD18	0.0807425	0.0412978	-0.0420298	0.157902	20	No
FLOT2	6.00264	0.549271	-0.126987	0.153993	20	No
BTBD17	0.00286399	0.00729485	-0.277937	0.145465	20	No
FLOT1	5.93679	0.611064	-0.274684	0.182679	20	No
PSMC3IP	5.23205	0.713343	0.0408963	0.124138	20	No
BTBD16	0.00567276	0.0156992	0.0868909	0.140151	20	No
CPLX4	0.0184665	0.0219423	0.224215	0.128202	20	No
ALAD	4.2611	0.433601	-0.237584	0.227535	20	No
CPLX3	0.298715	0.475839	0.103276	0.106207	20	No
CPLX2	0.049477	0.0492507	0.189269	0.124205	20	No
CPLX1	0.636059	0.74908	0.251221	0.147646	20	No
BTBD11	0.0283074	0.0274405	-0.182762	0.143046	20	No
LALBA	0.00282918	0.0123321	0.0592361	0.121272	20	No
BTBD10	3.94585	0.457893	-0.0787753	0.122127	20	No
PGK2	0.0208092	0.0749923	0.179892	0.107901	20	No
PGK1	7.87733	0.59634	-1.24422	0.377023	17	No
TMEM139	0.373367	0.312166	-0.00865155	0.158436	20	No
GUCD1	5.97419	0.463774	-0.144454	0.121799	20	No
TMEM138	5.43628	0.460288	0.0731078	0.117787	20	No
APBB1IP	2.91461	2.17608	0.0598313	0.14702	20	No
TMEM136	2.34541	1.76427	0.0259134	0.122426	20	No
TMEM135	3.79464	0.784484	-0.00711033	0.130782	20	No
TMEM134	4.75159	0.622587	-0.0212031	0.10401	20	No
TMEM131	3.92727	0.533514	-0.140234	0.224033	20	No
TMEM130	0.204874	0.363649	-0.0206058	0.14573	20	No
CAMSAP3	1.74504	1.06513	-0.0139357	0.150623	20	No
NREP	3.87358	1.71189	0.293147	0.136139	20	No
NRF1	3.67429	0.532081	-1.0249	0.175872	20	No
CAMSAP2	2.99656	0.988855	-0.139577	0.187792	20	No
CAMSAP1	3.4367	0.491845	-0.107889	0.141748	20	No
DOCK9	3.55129	1.0796	0.0156217	0.157695	20	No
DOCK8	2.88432	1.57562	-0.0553878	0.129152	20	No
DOCK7	2.27398	0.935587	-0.156022	0.130993	20	No
OOSP2	0	0	-0.154912	0.0897547	20	No
DOCK6	1.47786	1.03149	-0.39731	0.152792	20	No
DOCK5	1.16	0.977024	0.0166951	0.101517	20	No
DOCK4	2.32439	1.42611	-0.00468464	0.164596	20	No
DOCK3	0.862785	0.730242	0.0322259	0.116908	20	No
TMEM129	4.54095	0.679117	-0.0133399	0.144046	20	No
DOCK2	4.23487	1.92173	0.204839	0.237719	20	No
TMEM128	3.98774	0.724016	0.125993	0.107875	20	No
SPRN	1.50048	0.627643	0.141514	0.115463	20	No
EGFL8	1.36429	0.90575	-0.142183	0.103623	20	No
TMEM127	3.78572	0.604451	-0.337749	0.25536	20	No
EGFL7	1.13181	1.74615	-0.0667351	0.107604	20	No
EGFL6	0.0655734	0.212968	0.268065	0.103087	17	No
TMEM125	0.191434	0.252065	0.0431565	0.137237	20	No
TMEM123	6.43	1.30471	0.142999	0.122718	20	No
TMEM121	0.627036	0.930225	-0.233417	0.22009	20	No
TICRR	3.23586	0.868752	-1.1639	0.234498	20	No
CTDSPL	0.678784	0.882799	0.330673	0.167906	20	No
ELMOD3	3.55799	0.493322	-0.250732	0.152616	20	No
ELMOD2	3.48599	0.697692	0.100476	0.130361	20	No
ELMOD1	0.607088	0.922445	-0.109017	0.122226	20	No
UNC45B	0.00354694	0.0125622	-0.207446	0.105849	20	No
UNC45A	5.34075	0.438846	-0.364798	0.138348	20	No
NRDC	6.30981	0.63536	-0.270673	0.188569	20	No
SCYL3	2.75379	0.641833	-0.0231585	0.123059	20	No
SCYL2	3.93098	0.591549	0.0850006	0.130465	20	No
SCYL1	5.47872	0.492374	-0.566253	0.257673	20	No
TMEM119	0.46804	0.648152	-0.163069	0.142451	20	No
TMEM117	1.83417	0.661354	-0.0848956	0.135108	20	No
TMEM116	3.63023	0.826085	0.0176411	0.103135	20	No
TMEM115	4.28794	0.521072	-0.039668	0.12108	20	No
CTDSP2	6.23671	0.579024	-0.264614	0.184758	20	No
CTDSP1	5.30097	0.546614	-0.227919	0.173135	20	No
SENP8	1.28966	0.442689	-0.193484	0.13962	20	No
SENP7	2.87784	0.522164	-0.031399	0.13515	20	No
SENP6	4.90031	0.549416	-1.23792	0.255239	20	No
SENP5	3.87358	0.516958	0.0970656	0.110044	20	No
SENP2	4.96511	0.65233	-0.111112	0.119653	20	No
SENP1	3.66073	0.517565	-0.292078	0.136723	20	No
KAAG1	0.0141754	0.0496548	0.0251732	0.123741	20	No
NHLRC4	1.08283	0.479189	0.0248734	0.158444	20	No
NHLRC3	3.83156	0.45533	-0.049747	0.0932101	20	No
NHLRC2	2.31696	0.535235	-0.900158	0.356752	20	No
NHLRC1	0.0312867	0.0977701	-0.069211	0.105766	20	No
TMEM109	6.90597	0.703579	-0.152975	0.0764265	20	No
RPP25L	5.14753	0.581855	-0.315571	0.406838	20	No
TMEM108	0.646121	1.14185	0.0476511	0.187231	20	No
TMEM107	4.19923	0.760268	-0.124661	0.175901	20	No
CKAP2L	3.41947	0.752483	-0.182005	0.150452	20	No
KLRG2	0.102732	0.292719	-0.00844521	0.125215	20	No
KLRG1	1.2544	0.679362	0.0635427	0.0645393	20	No
TMEM104	3.1333	0.48313	-0.230933	0.129194	20	No
CDC42SE2	4.77085	1.27789	-0.0262034	0.143717	20	No
CDC42SE1	6.06618	0.658385	-0.397755	0.154788	20	No
TMEM102	1.87805	0.856578	-0.102445	0.137337	20	No
TMEM101	5.3356	0.518406	-0.201356	0.170108	20	No
TMEM100	0.226875	0.525375	0.136897	0.136253	20	No
SSSCA1	6.10654	0.699426	-0.278769	0.166133	20	No
IST1	6.978	0.602254	-0.268408	0.183471	20	No
SPP2	0	0	0.264608	0.111665	20	No
SPOP	5.43771	0.355315	-0.0300251	0.140548	20	No
SPP1	1.68991	2.60103	0.157996	0.0887831	20	No
KLRF2	0.0845358	0.210839	0.0953601	0.107037	20	No
KLRF1	0.206695	0.506114	0.153989	0.11738	20	No
NRAS	5.22877	0.82314	-0.423156	0.623731	20	No
PIP4K2C	4.22177	0.649749	-0.154722	0.167205	20	No
PIP4K2B	4.15785	0.539167	-0.00702141	0.135495	20	No
NRAP	0.000717765	0.00312866	0.102241	0.0871748	20	No
PIP4K2A	4.53498	1.14122	0.14842	0.117992	20	No
NSMCE3	2.63113	0.855283	-0.977795	0.252948	20	No
NSMCE2	5.20412	0.639689	-0.461251	0.155852	20	No
NSMCE1	5.38854	0.769884	-0.784606	0.185448	20	No
RUSC2	0.4977	0.549545	0.166577	0.0956377	20	No
RUSC1	3.98445	0.939303	-0.294795	0.119545	20	No
KLRD1	0.0329123	0.060623	0.0613054	0.0997555	20	No
MRGBP	3.69398	0.588704	-1.14169	0.282512	20	No
C1GALT1	3.90326	1.05703	-0.0151055	0.156095	20	No
KLRC4	0.00621641	0.0270967	0.058428	0.122179	20	No
KLRC3	0.0134355	0.0242546	0.31933	0.112657	20	No
KLRC2	0.0357407	0.0602189	0.210164	0.123666	20	No
KLRC1	0.0640834	0.151962	0.177392	0.0970222	20	No
KRTAP5-9	0.132832	0.153773	-0.50656	0.121001	20	No
KRTAP5-8	0.0639251	0.0685204	0.012157	0.0773732	20	No
KRTAP5-7	0.0618215	0.0530781	-0.874484	0.162232	20	No
KRTAP5-6	0	0	0.0915328	0.141113	20	No
KRTAP5-5	0.00356067	0.0109114	-0.0946339	0.132987	20	No
KRTAP5-4	0.000717765	0.00312866	0.149206	0.106811	20	No
KRTAP5-3	0.00356067	0.0109114	-0.306512	0.172492	20	No
KRTAP5-2	0.0303993	0.0528586	-0.177347	0.121364	20	No
KRTAP5-1	0.262031	0.594182	-0.234688	0.166273	20	No
GLYCTK	2.9366	0.532777	-0.0109476	0.108743	20	No
RECQL	5.19971	0.694578	0.209156	0.106387	20	No
LAPTM5	4.58044	3.05569	0.0690358	0.120001	20	No
KLRB1	0.026115	0.0307975	-0.0984594	0.110949	20	No
TCP11L2	2.13449	0.863771	0.140294	0.128645	20	No
TCP11L1	2.92402	0.686439	0.0665019	0.107914	20	No
FOXS1	0.0146942	0.0325454	-0.108089	0.172843	20	No
PGA3	0.0258975	0.0729278	0.244646	0.171172	20	No
ACTBL2	0.00430659	0.00657842	0.0456409	0.127943	20	No
SLC25A6	8.15103	0.957818	0.0528333	0.180727	17	No
SLC25A5	8.91301	0.552998	-0.253298	0.155285	17	No
SLC25A4	4.85968	0.956514	0.0248867	0.100152	20	No
SLC25A3	8.16155	0.597504	-0.823386	0.16053	20	No
SLC25A2	0.0247819	0.0266122	-0.0125833	0.112547	20	No
RPTOR	3.50106	0.646311	-0.937629	0.179163	20	No
SLC25A1	4.6796	0.687246	-0.365699	0.262277	20	No
SPIC	0.0836525	0.300063	-0.281559	0.117438	20	No
SPIB	2.30719	1.27148	0.0849097	0.130509	20	No
FOXR2	0.15492	0.600233	-0.126146	0.153726	17	No
FOXR1	0.0188321	0.0382396	0.104404	0.130529	20	No
ISLR	0.173884	0.339332	0.0580588	0.130555	20	No
ISM2	0.304659	0.959097	-0.19902	0.127224	20	No
ISM1	0.119871	0.162172	0.130612	0.198261	20	No
SPI1	1.0439	1.53261	-0.123227	0.252616	20	No
TRANK1	2.18927	1.1125	-0.128854	0.106236	20	No
HMG20B	5.54923	0.538983	0.0548204	0.17527	20	No
HMG20A	4.7284	0.528237	-0.0280879	0.15188	20	No
FOXQ1	0.0727946	0.171544	0.077612	0.136724	20	No
ISL2	2.29488	1.16268	0.000990358	0.18179	20	No
ISL1	0.360122	0.56825	0.0931668	0.145819	20	No
PACS2	4.03731	0.908374	-0.347738	0.149226	20	No
PACS1	4.28395	0.75542	-0.293273	0.156029	20	No
STIP1	7.2903	0.555043	-0.318087	0.17251	20	No
AKT3	1.97284	1.415	0.124657	0.108041	20	No
AKT2	5.97602	0.516027	-0.413697	0.193193	20	No
AKT1	5.72164	0.583138	-0.03088	0.104584	20	No
PACRG	0.120431	0.148717	0.104851	0.15318	20	No
FOXP4	2.83395	0.732767	-0.0985521	0.0956472	20	No
FOXP3	0.366215	0.490235	0.191321	0.0958873	17	No
FOXP2	2.29331	1.21598	0.131602	0.163664	20	No
FOXP1	2.0056	1.04042	-0.00198409	0.185064	20	No
SPG7	5.5786	0.700071	0.113703	0.14457	20	No
FOXO4	3.13238	0.710225	-0.0907593	0.136464	17	No
FOXO3	4.74121	1.34368	0.0882562	0.378844	20	No
FOXO1	2.58263	0.888507	-0.225971	0.14346	20	No
DEFB1	0.317428	0.393934	0.0683025	0.0832742	20	No
SPEN	5.23646	0.473538	0.0883839	0.201573	20	No
RAB40AL	0.157665	0.120902	0.00233871	0.151402	17	No
SPEG	0.723695	0.554621	0.0290015	0.0974341	20	No
FOXN4	0.517105	0.763906	-0.399676	0.159584	20	No
FOXN3	4.14789	1.2092	0.100567	0.152468	20	No
FOXN2	3.80666	0.430149	-0.0190744	0.136907	20	No
FOXN1	0.00702676	0.0218662	-0.17321	0.135278	20	No
IER3IP1	4.83629	0.585057	-0.230447	0.22133	20	No
DEFA6	0	0	0.176744	0.119292	20	No
DEFA5	0	0	0.00936439	0.122867	20	No
DEFA4	0	0	0.0107079	0.112991	20	No
DEFA1	0.163654	0.224223	0.226811	0.119365	20	No
STIM2	4.51494	0.445661	-0.0901389	0.123709	20	No
STIM1	5.33418	0.713556	-0.191555	0.147706	20	No
AICDA	0.0376309	0.114504	-0.0111231	0.159528	20	No
FOXM1	5.31152	0.962526	-0.362573	0.190906	20	No
TNKS1BP1	4.17021	0.94598	-0.0993945	0.129653	20	No
PNISR	6.26942	0.596374	-0.523355	0.161335	20	No
CA5B	1.2404	0.399896	-0.0952268	0.150083	17	No
CA5A	0.0130916	0.03933	-0.465946	0.0985814	20	No
FOXL2	0.018051	0.0405249	-0.457712	0.136506	20	No
FOXL1	0.0826277	0.219444	-0.045983	0.150717	20	No
LCA5L	0.860519	0.386425	0.030043	0.106703	20	No
DTX4	0.76717	0.796545	-0.0165871	0.0810015	20	No
DTX3	3.81781	1.65542	-0.151924	0.0988825	20	No
DTX2	3.20467	0.696729	-0.373075	0.202081	20	No
DTX1	0.55985	1.00775	0.00545901	0.101154	20	No
FOXK2	4.9203	0.617324	-0.0967893	0.160602	20	No
FOXK1	3.27739	0.687179	-0.478882	0.393321	20	No
AKNA	4.32445	1.29643	-0.00574255	0.136534	20	No
TYRP1	0.289472	0.515336	0.0535205	0.113594	20	No
CAPZB	7.19489	0.527464	-1.25411	0.225955	20	No
FOXJ3	4.11521	0.464053	-0.0347566	0.123223	20	No
FOXJ2	2.75505	0.570655	-0.0878547	0.109114	20	No
FOXJ1	0.270895	0.652656	0.117723	0.15287	20	No
PNPLA8	3.7508	0.586685	-0.063565	0.158499	20	No
PNPLA7	1.30157	0.710758	-0.134616	0.167371	20	No
PNPLA6	5.05074	0.463277	-0.169185	0.154257	20	No
PNPLA5	0.126401	0.534742	-0.0217302	0.110214	20	No
PNPLA4	2.71426	1.12387	0.0984835	0.0931097	17	No
TYRO3	2.17059	1.22099	-0.16993	0.130406	20	No
PNPLA3	0.044561	0.0501274	0.0618503	0.110567	20	No
PNPLA2	5.17577	0.49018	-0.0953764	0.159731	20	No
PNPLA1	0.0981984	0.0891166	0.0554059	0.166378	20	No
PDZD11	5.15274	0.654408	-0.0625731	0.128415	17	No
FOXI2	0.0125105	0.0341745	0.00695264	0.09503	20	No
FOXI1	0.0575485	0.138307	0.101454	0.122565	20	No
ISCU	7.26406	0.672086	-1.61825	0.164892	20	No
FIZ1	3.14064	0.400004	-0.079648	0.126073	20	No
OGFOD3	3.89215	0.911414	-0.136703	0.183737	20	No
PPFIBP2	3.12573	1.09409	0.0767496	0.140629	20	No
SULT6B1	0	0	-0.2816	0.113188	20	No
OGFOD2	4.42336	0.726358	0.0471616	0.103981	20	No
PPFIBP1	2.2718	1.35813	0.0281497	0.0957472	20	No
OGFOD1	5.67968	0.7019	-0.450558	0.119799	20	No
DHODH	3.42567	0.550156	-0.863328	0.226335	20	No
FOXH1	0.369294	0.484161	-0.0265885	0.190005	20	No
[truncated: 16,454 more rows]
