# Supplementary material for: Epigenetic Plasticity Drives Carcinogenesis and Multi-Therapy Resistance in Multiple Myeloma
Source: Research Square preprint supplement (doi:10.21203/rs.3.rs-6306816/v1), 2025-04-15
Supplement: Supplementary file 14 [file b34e60259390f9b54f4f14b0.xlsx]

## Sheet: Sheet1
Gene	8226_1	8226_2	8226_3	8226_B25_1	8226_B25_2	8226_B25_3
A1BG	0.829274	1.75624	1.32773	4.33185	4.31293	3.33527
A1BG-AS1	2.53458	2.21906	2.25723	3.50653	3.29527	3.29093
A1CF	0.0151592	0.0143995	0.0214536	0.0230281	0.0109904	0.0358376
A2M	0	0	0	0.0155216	0.0592674	0.0223002
A2M-AS1	0	0	0	0	0	0
A2ML1	0.0127677	0	0.00775377	0.0130477	0.0186287	0.00721745
A2MP1	0	0	0	0	0	0
A3GALT2	0	0	0	0	0	0
A4GALT	0.578927	1.52515	0.391753	1.07615	1.01306	1.89255
A4GNT	0	0	0	0	0	0
AA06	0	0	0	0	0	0
AAAS	45.3954	42.7958	46.5522	62.8665	58.8882	61.2683
AACS	18.6227	18.7042	18.3668	16.8619	16.5559	16.4849
AACSP1	0.650955	0.536138	0.631717	0.448274	0.441008	0.38854
AADAC	0	0	0	0	0	0
AADACL2	0	0	0	0	0	0
AADACL2-AS1	0	0	0	0	0	0
AADACL3	0	0	0	0.0127744	0	0
AADACL4	0	0	0	0	0	0
AADACP1	0	0	0	0	0	0
AADAT	0	0	0	0	0.0175611	0.0131209
AAED1	2.37265	2.109	2.07867	7.18613	9.20665	8.17489
AAGAB	18.5359	17.7424	18.0518	62.3729	70.6984	60.6355
AAK1	0.606035	0.640244	0.595433	2.79969	2.90952	2.87691
AAMDC	11.9473	11.0168	11.3297	22.7363	23.0469	21.2752
AAMP	51.7173	53.1055	48.9308	103.177	90.3433	90.6504
AANAT	0.405663	0.519597	0.408697	0.275861	0.190823	0.304631
AAR2	21.9819	21.4579	21.2459	36.7299	34.4036	37.1837
AARD	0.0501229	0.0349363	0.100718	0.0947176	0.168008	0.0952106
AARS	316.062	302.543	307.483	688.344	683.573	705.967
AARS2	3.38164	3.19278	3.19065	7.46991	7.04463	7.37396
AARSD1	68.4917	62.6349	63.9871	72.4164	70.4829	71.8629
AASDH	2.2946	2.21676	2.54607	4.2064	4.86058	4.60078
AASDHPPT	34.8619	37.8199	31.1546	29.1682	30.2276	26.3844
AASS	0.774139	0.801995	0.725827	0.0302762	0.0245061	0.0412834
AATBC	0.113972	0.159856	0.125686	0.419711	0.578445	0.435297
AATF	53.3529	50.2102	52.9284	78.5645	85.7867	86.3295
AATK	0.040215	0.0106754	0.0169969	0.00472987	0.00677268	0.00509664
ABALON	0.648461	0.651951	0.660968	1.09106	0.999613	1.25908
ABAT	0.615665	0.686588	0.602287	0.417334	0.496782	0.417187
ABCA1	0.368715	0.355385	0.285607	0.0832276	0.0579761	0.0969528
ABCA10	0.0112552	0.0216498	0.00904067	0.0151743	0.0218461	0.0040837
ABCA11P	1.09313	1.01357	0.964763	2.14954	2.52631	1.91255
ABCA12	0.00870358	0.00331562	0.0140773	0.00587611	0.0168279	0.00316588
ABCA13	0.0107935	0.0250077	0.0116789	0.0301047	0.0258573	0.0222617
ABCA17P	0	0	0	0.0291332	0.0249888	0.0188378
ABCA2	4.83097	5.80565	4.66252	3.7201	3.38286	3.66317
ABCA3	1.79057	1.85069	1.70477	3.55437	3.44992	3.55754
ABCA4	0.0289354	0.0257202	0.0156001	0.0227913	0.00932419	0.0456088
ABCA5	0.910456	0.702428	0.884941	1.46302	1.69924	1.56707
ABCA6	0	0	0	0.0865	0.0977833	0.0490566
ABCA7	8.58873	9.18018	8.36589	9.76104	8.66851	9.56073
ABCA8	0	0	0	0.00798375	0	0
ABCA9	0.247032	0.20101	0.292123	0.183083	0.281528	0.167869
ABCA9-AS1	0	0	0	0	0	0
ABCB1	0.0639037	0.042301	0.0303717	0.0114161	0.008247	0.0126302
ABCB10	9.47956	11.0411	8.05327	12.9141	11.9134	10.679
ABCB11	0.0386227	0.0426661	0.0259677	0.0354927	0.0552373	0.0838708
ABCB4	0.0403502	0.0741754	0.0800841	0.223612	0.237793	0.10959
ABCB5	0.145651	0.197988	0.0884312	0.221002	0.224915	0.229314
ABCB6	2.95306	2.99041	2.91504	1.99656	1.87729	2.14216
ABCB7	18.9611	19.631	19.4445	29.8057	33.0693	29.6816
ABCB8	6.05391	7.05905	5.98673	9.14062	7.28333	7.92239
ABCB9	0.812643	1.05317	0.827353	1.09387	1.05215	1.04588
ABCC1	7.62828	7.94861	6.87792	16.9087	14.9716	16.2321
ABCC10	4.46259	4.48411	4.58824	4.37781	3.97345	4.74093
ABCC11	0.00982785	0.00614281	0	0.0381031	0.00779422	0.0234615
ABCC12	0	0	0	0	0	0
ABCC13	0.0785103	0.0398968	0.0637877	0.0620096	0.101974	0.106449
ABCC2	0.30569	0.149724	0.180112	0.389178	0.373619	0.447949
ABCC3	0	0	0	0	0.0377792	0
ABCC4	6.00475	6.59582	6.41251	5.90444	6.44503	5.71621
ABCC5	4.57224	3.87213	3.81392	5.75445	6.21343	6.13081
ABCC5-AS1	0.0848653	0.193976	0.205893	0.171887	0	0.185216
ABCC6	0.0530596	0	0	0.11737	0.0623362	0.00959022
ABCC6P1	0	0	0.0109388	0.0210407	0	0.0418653
ABCC6P2	0	0	0	2.02347e-06	2.94349e-06	0
ABCC8	0.00926177	0	0	0	0	0
ABCC9	1.21914	1.04255	1.30609	1.22038	1.54541	1.55889
ABCD1	2.60055	3.41372	2.67784	8.25898	6.89612	7.89867
ABCD2	1.08731	1.27318	1.17842	0.293331	0.361863	0.316077
ABCD3	4.30285	4.89717	4.01662	12.5519	13.7463	12.0738
ABCD4	6.63936	6.25756	6.29888	7.04223	7.01455	6.6579
ABCE1	38.6754	39.1333	36.2437	59.3406	66.8722	58.5981
ABCF1	49.935	46.7462	48.6472	79.626	78.5978	84.7317
ABCF2	43.8253	41.0925	43.1263	38.5524	40.1561	38.431
ABCF3	35.8978	34.2588	33.6211	40.539	40.8331	40.8479
ABCG1	29.2531	31.6322	27.4709	47.1116	43.075	43.8035
ABCG2	14.4932	14.4186	13.769	1.09157	1.23816	0.946967
ABCG4	0.0730368	0.182116	0.0805434	0.18155	0.0962816	0.152155
ABCG5	0	0	0.0218776	0	0	0
ABCG8	0	0	0	0	0	0
ABHD1	1.76536	1.52345	1.98852	0.784438	0.914259	0.766636
ABHD10	6.16979	6.31713	6.17562	4.58986	5.27639	4.75382
ABHD11	24.5129	23.9604	24.5583	13.0416	12.7823	12.5854
ABHD11-AS1	0.0836264	0.669006	0.608661	0.338756	0.121266	0.0912559
ABHD12	78.5841	77.6134	75.441	42.2321	40.7298	42.5377
ABHD12B	0.125505	0.143433	0.0652477	0.0181571	0.129995	0.0586951
ABHD13	2.18971	2.16475	1.69478	3.07915	3.29216	2.66802
ABHD14A	86.8379	89.4852	91.0267	13.9069	12.5062	12.9357
ABHD14A-ACY1	6.64237	4.83231	1.38389	2.70691	2.45818	4.16953
ABHD14B	160.75	157.842	168.134	108.326	102.443	110.801
ABHD15	5.56966	5.76171	5.4193	8.41882	9.22365	8.78189
ABHD16A	31.0055	31.5345	29.3709	42.6438	37.3499	40.4887
ABHD16B	0.363247	0.448347	0.334886	0.706296	0.905993	0.840342
ABHD17A	12.6116	17.5085	12.7186	26.2168	24.3369	26.2552
ABHD17B	0.0651692	0.06673	0.0791633	0.0169958	0.066651	0.0274689
ABHD17C	5.61171	5.40569	5.15897	15.5889	18.5462	16.7864
ABHD18	1.67534	1.83405	1.84198	4.16592	5.05118	4.46579
ABHD2	17.7812	19.2151	17.4257	15.807	16.0774	16.7573
ABHD3	60.4153	66.1401	58.8357	35.538	34.482	31.7949
ABHD4	9.85364	9.19442	9.17822	45.8056	42.0154	46.1254
ABHD5	3.80129	3.7961	3.8455	21.0553	22.4377	21.2211
ABHD6	5.24363	5.13392	5.22714	12.4553	12.5726	11.8094
ABHD8	3.61353	4.7861	3.55609	5.35588	4.85822	5.26196
ABI1	35.5691	36.4477	33.4943	58.774	61.332	58.7213
ABI2	1.63229	1.62927	1.62674	4.7368	5.23453	5.01916
ABI3	0	0	0	0.0121364	0	0.0130775
ABI3BP	0.200211	0.240185	0.136094	0.0541006	0.0221327	0.0458027
ABL1	7.6158	8.73962	7.17314	12.3597	11.46	12.2392
ABL2	2.20387	2.41165	2.12985	4.58212	4.93663	4.78284
ABLIM1	16.9712	16.8638	15.9646	11.0092	11.0125	10.8758
ABLIM2	0.179888	0.129477	0.138226	1.28508	1.51351	1.24687
ABLIM3	0	0	0.00936507	0	0	0
ABO	0.0165921	0	0.0201271	0	0	0
ABR	15.9506	14.2388	15.3569	13.0703	12.1097	13.2942
ABRA	0	0.0560669	0.0422644	0.0364394	0.0258456	0
ABRACL	17.8183	18.9872	16.8197	33.3373	35.6897	31.6427
ABRAXAS1	3.51795	3.96189	3.68657	4.58562	4.98971	4.16833
ABRAXAS2	4.77197	4.67988	4.57157	11.4082	12.3965	11.8745
ABT1	28.2731	31.3734	28.6301	38.1727	38.1987	36.9189
ABTB1	18.6311	19.9186	18.1355	16.3762	13.8201	14.3478
ABTB2	0.184474	0.25521	0.265	1.17007	1.07001	1.12307
ACAA1	28.8893	27.9893	26.6835	25.1544	23.933	22.7356
ACAA2	89.1449	86.2984	89.8717	240.903	260.431	229.83
ACACA	13.7423	14.18	13.3345	19.1146	18.817	19.0464
ACACB	0.088593	0.109176	0.121525	0.16402	0.221666	0.195063
ACAD10	7.62111	7.45157	7.11363	12.7915	11.9257	12.398
ACAD11	6.46448	5.85551	5.99638	17.3359	19.5333	18.8545
ACAD8	7.40688	7.76386	6.80763	13.6675	13.8047	12.2355
ACAD9	13.4277	12.5984	13.7743	12.0567	13.4884	12.2183
ACADL	0.00968454	0	0	0	0	0
ACADM	14.73	16.0084	13.387	19.6289	22.792	18.0441
ACADS	1.22033	1.26112	1.18111	0.0920302	0.0758168	0.0570544
ACADSB	1.23423	1.2302	1.15535	2.64292	2.84806	2.70114
ACADVL	160.473	155.184	155.199	252.56	254.643	251.316
ACAN	0	0	0.0066624	0	0.0159285	0.00599332
ACAP1	2.74096	3.00855	2.43988	0.419363	0.443214	0.613268
ACAP2	5.64407	6.37164	4.88053	13.7857	13.9349	11.9028
ACAP3	18.6006	21.0687	17.7252	25.0021	22.1666	23.6574
ACAT1	121.713	116.323	128.672	152.556	175.216	161.642
ACAT2	35.8071	33.9142	36.2025	82.1285	85.0143	79.364
ACBD3	15.9322	17.2702	13.9389	31.0636	29.9743	27.8358
ACBD3-AS1	0.23186	0.277806	0	0.249387	0.419985	0
ACBD4	14.6244	16.0057	14.1376	23.0008	21.2691	22.6014
ACBD5	7.76479	8.27028	7.17462	25.1034	28.04	25.0009
ACBD6	42.6601	44.4511	45.4765	53.7571	58.4866	52.8649
ACBD7	4.14671	3.86467	4.5357	3.69531	4.87541	4.48783
ACBD7-DCLRE1CP1	0	0	0	0	0	0
ACCS	0	0	0	0	0.0195337	0.0146997
ACCSL	0.0141355	0	0	0	0.0204977	0
ACD	16.8863	16.8661	16.5659	31.3596	29.9146	30.466
ACE	0.269132	0.273403	0.217648	0	0.00696578	0
ACE2	0.0345085	0.0236628	0.00837215	0.0139788	0.0100081	0.00753136
ACER1	0	0	0	0	0	0
ACER2	0.0172738	0.0197413	0.0523851	0.0524797	0.0876696	0.0471242
ACER3	0.671787	0.703523	0.594831	1.60861	1.71221	1.60415
ACHE	0.0505541	0.0577756	0.0794158	0	0	0.0275832
ACIN1	37.6956	33.7763	38.6746	64.9947	63.1979	71.7959
ACKR1	0	0	0	0	0	0
ACKR2	0.101256	0.129997	0.0900204	0.276746	0.287631	0.309131
ACKR3	4.91776	4.23912	4.29633	0	0.0173508	0.0522279
ACKR4	0.191212	0.238165	0.212641	0.291441	0.469338	0.281554
ACLY	66.6938	68.4636	65.9807	150.461	148.312	149.449
ACMSD	0	0	0	0	0	0
ACO1	5.26155	5.39002	5.44006	11.8854	12.3834	12.2195
ACO2	82.19	80.3609	80.6177	147.822	145.701	155.362
ACOD1	0	0	0	0	0	0
ACOT1	0	0	0	0	0	0
ACOT11	0.0252353	0.0175632	0.0186422	0.0333375	0.0182967	0.0275376
ACOT12	0.0128009	0.058518	0.0155282	0.0129636	0.0371249	0
ACOT13	11.0524	10.5657	11.0587	25.8298	28.7754	28.145
ACOT2	0.322567	0.287089	0.238418	8.20246	9.07886	8.36971
ACOT4	0	0	0	0	0	0
ACOT6	0	0	0	0	0	0
ACOT7	13.975	13.3862	13.2584	47.5871	41.9582	43.9947
ACOT8	16.7721	19.8062	18.5175	40.4171	37.2682	35.5597
ACOT9	18.0383	16.5112	16.8075	70.0995	75.737	69.7669
ACOX1	4.01116	4.05508	3.80855	5.10096	5.90048	5.26924
ACOX2	0	0	0	0	0	0
ACOX3	5.25013	5.51091	5.10481	10.1206	9.57668	9.26573
ACOXL	4.28972	4.89045	4.12969	0.309539	0.351525	0.32204
ACOXL-AS1	0.0380246	0.0434563	0.0184504	0.00770155	0.0220556	0.033195
ACP1	73.2817	72.0235	71.2764	85.5684	92.7588	88.7256
ACP2	30.4654	30.4412	30.5825	21.5076	21.4938	21.7889
ACP4	0.0199596	0.0684324	0.0484243	0.101066	0.0578864	0.108903
ACP5	9.96778	9.91014	10.1577	0.141925	0.11195	0.138719
ACP6	24.233	24.882	25.335	21.4379	21.7881	22.1533
ACP7	0.175692	0.142731	0.13446	0.146125	0.231043	0.212307
ACPP	0.702497	0.847819	0.808357	0.034079	0.0352454	0.122048
ACR	0.0386728	0.0220986	0.0703684	0.0783283	0.0280395	0.0422011
ACRBP	0.407474	0.279409	0.395431	0.0687752	0.0984789	0.0592866
ACRV1	0.0587529	0.0671456	0.0356353	0.0297497	0.0425984	0.0641131
ACSBG1	0.0491176	0.0654894	0.0397214	0.0497419	0.0593537	0.0714647
ACSBG2	0.0893125	0.0793883	0.120379	0.100497	0.201462	0.129948
ACSF2	24.9067	22.7108	22.9305	15.6085	16.1991	15.6766
ACSF3	3.21456	3.31108	3.08036	8.16366	7.90727	7.05769
ACSL1	12.4472	13.2161	11.8282	36.8421	39.4632	36.9258
ACSL3	12.3904	11.5397	11.4449	17.9766	21.3231	18.582
ACSL4	18.2006	20.2699	16.3394	36.7498	38.592	34.3955
ACSL5	10.8828	10.366	11.415	12.8643	13.8755	13.079
ACSL6	0.105068	0.105173	0.0828135	0.0816022	0.111598	0.0605734
ACSM1	0.0301495	0.0172282	0	0	0	0.0164501
ACSM2A	0	0.016616	0.0186241	0	0.0105415	0
ACSM2B	0.0102065	0	0	0	0	0
ACSM3	4.68425	4.50596	4.85891	12.1053	13.0305	12.4156
ACSM4	0.148404	0.203524	0.414053	0.330638	0.494958	0.275305
ACSM5	2.38688	2.40635	2.21076	0	0	0
ACSM6	0	0	0.017852	0	0	0
ACSS1	22.804	21.5817	21.123	13.6433	13.4408	13.3983
ACSS2	80.5029	72.5011	76.5864	74.0403	75.0568	75.614
ACSS3	0.642702	0.534829	0.429885	0.006079	0.0174063	0.0261934
ACTA1	0.0777358	0.0808459	0.042772	0.286636	0.306763	0.223384
ACTA2	0.0903108	0.14675	0.196976	2.77726	3.62916	3.45301
ACTA2-AS1	0	0	0	0	0.0231607	0.0490326
ACTB	1046.08	1041.02	1047.2	2188.25	1956.59	2194.77
ACTBL2	0	0	0	0	0	0
ACTC1	0	0.00770548	0	0	0	0.0143141
ACTG1	1598.21	1638.8	1502.85	2406.32	2264.94	2376.55
ACTG1P17	0.219661	0.228498	0.203917	0.394331	0.660474	0.68873
ACTG1P20	0.430987	0.327928	0.323518	0.721702	0.98079	0.639116
ACTG1P4	0.0256199	0.102476	0.0155386	0.0260551	0.113195	0.056459
ACTG2	0.0399889	0.0257491	0.0273309	0	0.0326714	0.0737585
ACTL10	1.34049	1.9615	1.39813	1.29409	1.12633	1.16203
ACTL6A	83.536	81.4115	82.5119	102.209	115.572	104.769
ACTL6B	0	0	0.020574	0.017176	0	0
ACTL7A	0	0	0	0	0	0
ACTL7B	0	0	0	0.0191933	0	0
ACTL8	16.8088	16.2175	16.391	180.582	175.931	180.492
ACTL9	0	0	0	0	0	0
ACTN1	0.760451	0.883363	0.653178	0.354973	0.404846	0.291622
ACTN1-AS1	0	0	0	0	0	0
ACTN2	0	0	0	0	0	0
ACTN3	0.00832314	0.0095121	0.0100965	0.0479933	0.0120693	0.03633
ACTN4	27.5741	28.0125	27.1553	67.6398	62.1271	69.3148
ACTR10	7.7492	8.41398	7.83569	25.8158	26.4008	24.6932
ACTR1A	19.8409	18.8522	19.1533	58.3653	57.1471	59.1665
ACTR1B	42.4442	43.6362	43.0365	70.6286	63.0486	66.4631
ACTR2	65.9089	71.0554	57.8564	141.891	159.488	141.927
ACTR3	37.7077	38.7672	36.4136	71.4881	79.3081	72.5748
ACTR3B	9.30085	9.36181	9.19401	6.1853	6.76813	7.02699
ACTR3BP2	0	0	0	0	0	0
ACTR3BP5	0	0	0	0	0	0
ACTR3C	2.64666	2.91965	2.69168	1.09064	1.69743	1.39017
ACTR5	3.48729	3.44563	3.64512	5.90296	5.61066	5.9001
ACTR6	14.003	13.1083	11.1802	25.944	31.0411	24.6123
ACTR8	11.1562	11.0015	11.3694	13.8349	13.9688	13.9163
ACTRT1	0	0	0	0	0	0
ACTRT2	0	0	0	0	0	0
ACTRT3	0.0252075	0.100829	0	0.0127639	0	0.0137536
ACVR1	3.84457	3.93481	3.52367	8.003	7.75535	8.12026
ACVR1B	2.11366	2.32938	2.22132	2.72523	2.72465	2.87501
ACVR1C	0.0587666	0.0824252	0.0680469	0.565376	0.60039	0.563786
ACVR2A	0.854668	0.756248	0.606487	0.794139	0.775639	0.843692
ACVR2B	1.89538	2.19648	1.92203	1.48873	1.43397	1.4002
ACVR2B-AS1	0.425796	0.39051	0.398708	0.270868	0.290335	0.325859
ACVRL1	0.0292315	0.0267044	0.0212403	0.378628	0.27935	0.312687
ACY1	45.9713	50.8895	51.5737	65.4263	56.2692	57.4885
ACY3	4.18102	5.15304	4.57458	0.394356	0.386358	0.424936
ACYP1	13.5342	11.7788	13.7212	41.9826	42.2524	41.3358
ACYP2	5.96409	7.09648	5.25745	8.98341	7.8473	8.60426
ADA	40.569	41.0784	39.2518	47.0457	42.7757	45.338
ADA2	2.60481	2.83142	2.80069	0.223247	0.242291	0.380997
ADAD1	0	0	0	0	0	0
ADAD2	0	0.0279028	0	0	0	0
ADAL	4.73466	4.11311	4.22214	8.14194	8.83072	7.9879
ADAM10	52.5359	53.4339	48.443	58.877	61.9725	56.7248
ADAM11	0.254184	0.290278	0.282094	0.262893	0.28238	0.2125
ADAM12	0.00584268	0.00333862	0.00354369	0	0.00423613	0
ADAM15	339.768	370.127	340.166	249.311	217.372	223.492
ADAM17	15.407	15.7927	14.9747	26.2391	29.1072	26.4256
ADAM18	0	0	0	0.012625	0	0.013604
ADAM19	0.598531	0.646944	0.542352	28.3679	28.8662	30.0915
ADAM1A	0.503215	0.50569	0.599904	0.817131	0.956166	0.766882
ADAM2	0.420033	0.27373	0.484243	0.56597	0.99854	0.645474
ADAM20	0.0351436	0.0100409	0	0.0177951	0.0254807	0.00958747
ADAM20P1	0.0199186	0.0341714	0.0566461	0.0388975	0.039738	0.0416702
ADAM21	0.00928805	0	0	0.158394	0.282838	0.246581
ADAM21P1	0	0	0.0150246	0.0647274	0	0.0225902
ADAM22	1.18799	1.17211	1.17595	5.62959	7.19963	6.42925
ADAM23	25.4718	25.406	25.01	6.17692	6.67067	6.87127
ADAM28	0.183423	0.262584	0.181611	4.41667	5.21244	4.45734
ADAM29	0.124983	0.133315	0.12129	0	0	0
ADAM30	0	0	0	0	0	0
ADAM32	0.108041	0.061737	0.109216	0.0455889	0.0652785	0.0116461
ADAM33	0.25471	0.198827	0.143474	0.00598643	0.00857109	0.0129091
ADAM3A	0	0.0117167	0	0	0.0148666	0
ADAM3B	0	0	0	0	0	0
ADAM5	0	0	0.0182986	0	0	0
ADAM6	0.0556156	0.0476701	0.0843311	0.112644	0.100809	0.136552
ADAM7	0	0	0	0	0	0
ADAM8	1.2163	1.48244	1.35396	27.5628	22.9807	23.8589
ADAM9	20.6428	22.3061	18.1681	29.7072	27.1029	26.1507
ADAMDEC1	0.04515	0	0.0273848	26.1729	30.7315	27.1503
ADAMTS1	0.271622	0.245995	0.254891	1.79057	1.93222	2.09719
ADAMTS10	0	0	0	0	0	0
ADAMTS12	0	0.00314103	0	0.858885	0.603368	0.63762
ADAMTS13	1.58065	1.3222	1.11227	1.63933	1.19067	1.40174
ADAMTS14	0.115449	0.0879592	0.134856	0.0129908	0	0.00466588
ADAMTS15	0.00418285	0.00956071	0	0.00847198	0.012131	0.0136934
ADAMTS16	0.00491182	0	0.0178749	0.0248711	0.0213677	0.0214398
ADAMTS17	1.34578	1.35024	1.17769	1.24701	1.21516	1.30652
ADAMTS18	0.0119922	0.00456842	0.00484906	0.0202412	0.0289828	0.0174484
ADAMTS19	0	0	0.00552046	0.00460869	0.00659916	0
ADAMTS19-AS1	0	0	0	0	0	0
ADAMTS2	1.3897	1.55788	1.33925	0.385302	0.321567	0.364178
ADAMTS20	0.286082	0.269511	0.314206	0.0743868	0.078484	0.0506242
ADAMTS3	0.0162595	0	0.0197236	0	0	0.00443572
ADAMTS4	0.0901657	0.114698	0.0910497	0.212132	0.304165	0.231932
ADAMTS5	0.125673	0.121529	0.117268	0	0.00350456	0
ADAMTS6	0	0.00367122	0	0.0260252	0.00931635	0.00350542
ADAMTS7	0.0710568	0.0413171	0.0599728	0.0130047	0	0
ADAMTS7P1	0.0929189	0.101562	0.0490962	0.0145515	0.0138908	0.0104532
ADAMTS8	0.00598423	0.0136781	0	0.00606027	0.0173553	0
ADAMTS9	0.00649848	0.0148535	0.00788302	0	0	0
ADAMTS9-AS1	0	0	0	0	0	0
ADAMTS9-AS2	0	0	0	0	0	0
ADAMTSL1	0.313097	0.371884	0.527059	0	0.0196608	0
ADAMTSL2	1.19713	1.44209	1.20884	0.0727152	0.078057	0.0909271
ADAMTSL3	0.00646273	0.00369296	0.00391983	0	0	0
ADAMTSL4	0.118431	0.16113	0.11026	0.0823281	0.0838757	0.09017
ADAMTSL4-AS1	0.266565	0.400627	0.545599	0.323316	0.34469	0.45777
ADAMTSL5	1.76915	2.5622	1.85589	3.48826	3.22554	3.5728
ADAP1	0.191846	0.237522	0.0787855	5.5648	4.51376	5.01116
ADAP2	16.676	15.5301	16.505	10.9024	11.2335	11.4047
ADAR	63.1189	69.0534	61.877	68.8478	67.8932	67.6669
ADARB1	8.01986	7.19174	8.04091	13.2969	14.0635	15.3469
ADARB2	0.01765	0.0127805	0.00338356	0.00283623	0.0165792	0.018307
ADARB2-AS1	0.293138	0.0558354	0	0.989542	0.850152	1.06627
ADAT1	7.18964	6.97006	7.30716	11.0573	11.6471	11.8963
ADAT2	2.41198	2.20724	2.37842	2.41052	2.61247	2.60129
ADAT3	0.389743	0.948274	0.780773	0.970486	0.705187	0.593428
ADCK1	3.62448	3.45257	3.74924	4.32798	3.71168	3.98228
ADCK2	6.02049	6.43543	6.3456	8.80438	7.53974	8.54528
ADCK5	2.1108	3.02267	2.62222	4.48127	3.96435	4.27374
ADCY1	29.4976	31.5937	29.3627	106.441	102.883	103.931
ADCY10	0.014387	0.0054807	0.0106232	0.00971317	0.0139082	0.00955632
ADCY10P1	2.31884	1.74697	1.92667	0.672897	0.798721	0.677593
ADCY2	0.0180323	0.00412131	0.0175004	0.0146326	0.0210244	0.023617
ADCY3	9.76199	10.2724	9.50069	16.2947	15.2805	16.0328
ADCY4	0.0213706	0.00814104	0	0.00721416	0	0
ADCY5	0.819009	0.850911	0.852381	0.056551	0.0607313	0.0355461
ADCY6	3.40079	3.35035	3.19397	9.73115	9.17686	9.69444
ADCY7	31.8917	34.0518	29.6519	24.6039	24.4662	23.6435
ADCY8	0	0	0	0	0	0
ADCY9	0.337233	0.253465	0.309576	0.0184604	0.0220278	0.0298379
ADCYAP1	0	0	0	0	0	0
ADCYAP1R1	0.00736495	0.00419376	0	0.00744242	0	0.00801559
ADD1	17.7681	17.7094	17.205	43.7929	42.3066	44.0595
ADD2	11.0823	11.7009	11.3259	15.247	15.3792	15.5984
ADD3	5.93037	6.27616	5.97591	3.0251	3.47879	2.80275
ADD3-AS1	0.0219901	0.0484492	0.0257128	0.0440029	0.0614741	0.117008
ADGB	0	0	0	0	0.00651378	0
ADGRA1	0	0	0	0.00662804	0	0
ADGRA1-AS1	0	0	0	0	0	0
ADGRA2	0.062659	0.0895122	0.076009	0.0277616	0.0283941	0.0384613
ADGRA3	1.95611	2.12794	1.80186	0.402548	0.485394	0.405226
ADGRB1	3.74021	4.53459	3.6255	0.00434872	0	0
ADGRB2	0.155512	0.203116	0.150916	0.0224983	0.0193291	0.0484858
ADGRB3	0.029425	0.0672565	0.0560908	0.00425697	0.0121911	0
ADGRD1	0.00440139	0	0	0.00445731	0	0.00480294
ADGRD1-AS1	0	0	0	0	0	0
ADGRE1	1.24418	1.28187	1.38587	3.52371	3.97737	3.66332
ADGRE2	2.31414	2.48747	2.22251	0.708839	0.84561	0.81095
ADGRE3	0	0.0143484	0	0	0	0
ADGRE4P	0.00997585	0.0229425	0.0369122	0.0611817	0	0.0330432
ADGRE5	45.5613	45.3148	42.6535	76.6615	71.8992	76.0484
ADGRF1	0.109139	0.219419	0.167433	0.126905	0.182088	0.19863
ADGRF2	0.0468921	0.037466	0.0285222	0.0712563	0.0610537	0.0411083
ADGRF3	0.100498	0.108276	0.0914327	0.23612	0.217658	0.173886
ADGRF4	0	0	0	0	0	0
ADGRF5	0	0	0	0	0	0
ADGRG1	4.41736	4.89415	4.44217	0.0726032	0.0780251	0.116677
ADGRG2	4.70266	4.33394	4.60025	7.26246	8.21856	7.42378
ADGRG3	0.0195093	0.0445922	0.0112214	0	0	0
ADGRG4	0.00706339	0	0.0114244	0.00953751	0.00341418	0.0102771
ADGRG5	0.369048	0.340615	0.348449	0.0431182	0.0538667	0.0562613
ADGRG6	7.34691	7.87128	7.0395	4.37853	4.7349	4.30571
ADGRG7	0	0.0122712	0	0	0	0
ADGRL1	6.55264	6.46326	6.55878	7.19833	6.30145	7.46959
ADGRL2	0.0498822	0.0379192	0.0652406	0.104448	0.0721636	0.156667
ADGRL3	0.269811	0.263997	0.302637	0.102931	0.091113	0.110913
ADGRL3-AS1	0	0	0	0	0	0
ADGRL4	0	0	0	0.0271401	0.0388617	0.0365557
ADGRV1	0.18883	0.169069	0.175078	0.411723	0.4116	0.375364
ADH1A	0	0	0	0	0	0.0204451
ADH1B	0	0	0	0	0	0
ADH1C	0	0	0	0	0	0
ADH4	0.0416593	0.0290987	0.0155732	0.0526809	0.130083	0.0586359
ADH5	20.9333	21.0199	20.4755	57.8464	53.7209	50.1612
ADH6	0.0190788	0.152629	0.0231437	0.270497	0.475173	0.187375
ADH7	0	0	0	0	0	0
ADHFE1	0.0402464	0.0153318	0.113916	0.108687	0.0972681	0.0439183
ADI1	70.5323	67.6022	69.2657	91.2624	102.29	91.8281
ADIG	0	0	0	0	0	0
ADIPOQ	0.0855497	0.121293	0.0879568	0.122154	0.162739	0.20969
ADIPOQ-AS1	0.140935	0.093562	0.125611	0.10012	0.105006	0.0449856
ADIPOR1	88.2094	87.7237	90.2866	148.854	157.508	160.004
ADIPOR2	22.8288	22.5595	22.0939	23.9286	24.6632	24.8653
ADIRF	0.193773	0.110726	0.0587643	0	0	0.158589
ADK	12.8935	13.4545	12.4408	29.642	29.9836	28.1398
ADM	18.1908	19.3749	17.5623	134.297	149.532	144.693
ADM2	20.2429	21.344	19.0517	25.1223	22.7688	25.5613
ADM5	0.682738	0.561243	0.552133	1.62542	1.32004	1.58155
ADNP	17.94	17.3783	16.8271	11.4447	12.5566	12.2909
ADNP2	5.42668	5.37126	4.89975	7.56541	8.00329	7.71465
ADNP-AS1	0.433494	0.557102	0.48829	0.909376	0.601655	0.541301
ADO	2.73798	2.848	2.71674	6.22727	6.06342	6.5265
ADORA1	0.115322	0.121658	0.129131	1.25771	0.926182	1.181
ADORA2A	35.2862	40.4533	35.268	30.0055	24.0977	27.0028
ADORA2A-AS1	0.141076	0.0932851	0.0333853	0.145524	0.141316	0.209784
ADORA2B	0.13848	0.0642208	0.13558	0.0964643	0.0708474	0
ADORA3	0	0.0334015	0	0.0295979	0.0635716	0.031893
ADPGK	82.2054	80.3289	79.2194	80.4666	89.5009	82.0814
ADPGK-AS1	0.116419	0.121787	0.0229689	0.158519	0.137275	0.115577
ADPRH	1.8717	1.58734	1.63079	0.0225654	0.00971827	0.0324203
ADPRHL1	2.28592	2.23925	2.75644	4.94771	4.63675	5.07803
ADPRHL2	38.169	37.066	35.4199	59.1242	54.9945	51.8062
ADPRM	5.29838	5.18177	5.18383	3.67687	4.58474	3.98095
ADRA1A	0.201644	0.109691	0.116135	0.0753099	0.172995	0.182114
ADRA1B	0	0	0	0	0	0
ADRA1D	0	0.0106148	0	0	0	0.0101354
ADRA2A	0	0	0	0	0	0
ADRA2B	0.0144474	0.041278	0	0.0219465	0.02095	0.00788276
ADRA2C	0	0	0	0	0	0
ADRB1	0.0172089	0.0304803	0.0417507	0.0090248	0.0134247	0.00961447
ADRB2	5.66986	5.36695	6.30969	1.26072	1.64436	1.47953
ADRB3	0	0	0	0.00989384	0	0
ADRM1	43.5688	52.0293	44.3003	124.863	122.141	117.18
ADSL	84.1486	84.7266	86.018	80.8084	79.3617	74.2521
ADSS	20.7301	20.5595	20.5357	29.8385	33.7908	31.2455
ADSSL1	0.956546	1.176	1.1634	0.176127	0.210163	0.158154
ADTRP	43.3697	41.8209	44.2178	13.3934	16.8503	14.339
AEBP1	2.1487	2.27449	1.97268	0.0237815	0.0170263	0.0256255
AEBP2	4.08463	4.1608	3.57189	5.11576	6.10331	5.12874
AEN	21.0321	21.3063	20.6359	31.9886	30.555	30.9932
AES	123.478	127.228	125.988	204.018	177.849	195.319
AFAP1	1.63414	1.73267	1.70768	1.05877	1.1665	1.06528
AFAP1-AS1	47.4905	47.9831	45.7625	63.5149	66.2198	70.9976
AFAP1L1	0.0776091	0.0643402	0.106278	0.120722	0.142748	0.133264
AFAP1L2	10.9578	10.9297	10.8664	0.0121943	0.0373423	0.00702529
AFDN	10.5507	10.7167	9.45572	15.0407	15.8766	15.265
AFDN-DT	0.0135503	0.0396691	0.0265594	0.0361284	0.0339737	0.0241192
AFF1	5.80561	5.86581	5.41335	10.9932	11.1048	11.4723
AFF1-AS1	1.39899	1.36033	1.1956	2.02511	2.49002	2.51323
AFF2	0	0.0021676	0	0	0	0.00186117
AFF3	0.0798401	0.0935867	0.0765647	0.115032	0.0681284	0.0627449
AFF4	3.43668	3.55075	2.97778	12.4273	12.7828	12.1542
AFG1L	0.469382	0.428166	0.335025	0.867496	1.06071	0.791738
AFG3L1P	2.41061	1.88427	2.16047	5.8322	6.33688	6.21518
AFG3L2	46.4367	46.3513	43.3254	98.0212	98.2651	90.2173
AFM	0	0	0	0.0129059	0.0184798	0.0139066
AFMID	47.5796	46.4828	53.0127	54.9903	55.237	61.1129
AFP	0	0	0	0	0	0
AFTPH	15.7634	15.6034	13.7204	26.3495	28.943	26.237
AGA	1.29716	1.32713	1.13571	7.2453	7.09224	7.15404
AGAP1	8.84722	9.3621	8.50635	8.09568	7.90735	8.39087
AGAP11	0.281027	0.13761	0.169722	0.195066	0.286259	0.148277
AGAP12P	0.162678	0.518144	0.51051	1.10888	0.692414	0.700875
AGAP1-IT1	0.662791	0.595154	0.631717	1.10271	0.343252	1.08489
AGAP2	6.91883	6.90873	6.91409	13.7099	13.3518	13.9168
AGAP2-AS1	0.331466	0.0468828	0.155428	0.0877659	0.732087	0.292202
AGAP3	31.0297	35.2196	29.389	24.7651	21.2239	21.722
AGAP4	4.11368	2.67179	2.76098	4.07815	3.88946	4.40093
AGAP5	3.31305	3.35492	3.41942	3.38149	4.1821	4.57433
AGAP6	4.94907	4.73939	4.61229	6.49947	6.78807	6.96084
AGAP7P	0.6567	0.661767	0.587019	0.49006	0.192603	0.546087
AGAP9	3.03545	3.24036	2.64328	3.96195	4.24364	4.22352
AGBL1	0.00651511	0	0	0.0131958	0	0
AGBL1-AS1	0	0	0	0	0	0
AGBL2	0.0682369	0.0613633	0.0488498	0.177825	0.204383	0.153804
AGBL3	0.316415	0.336337	0.220986	0	0	0
AGBL4	0.0331961	0.0217059	0.0546847	0.00841644	0	0.0379092
AGBL4-IT1	0	0	0	0	0	0
AGBL5	23.9991	23.6512	24.9194	32.4173	32.5545	35.8794
AGBL5-AS1	0	0	0	0.111561	0	0
AGER	6.01232	5.67342	5.38259	3.27039	3.37686	3.14042
AGFG1	3.0304	3.07699	3.02552	8.87764	9.46175	8.95844
AGFG2	1.32366	1.44475	1.29897	2.79642	2.61673	2.65081
AGGF1	11.2789	11.0391	11.2535	13.654	16.1475	14.0695
AGK	29.4952	30.9707	30.6505	20.3786	23.0613	23.0229
AGL	0.712942	0.73141	0.583264	2.81957	3.00273	2.78032
AGMAT	8.35045	8.86785	8.5478	10.8295	11.0626	11.8033
AGMO	0.199421	0.240831	0.2562	0.619283	0.727787	0.502159
AGO1	2.91744	2.86206	3.0107	5.84741	5.86054	6.40917
AGO2	5.72833	6.58776	5.30123	10.5442	10.1136	10.6229
AGO3	3.99072	3.94161	3.8311	8.31705	9.1603	8.68079
AGO4	2.0796	1.81033	1.91793	1.31441	1.57986	1.45582
AGPAT1	50.944	50.0835	51.9001	45.177	41.2048	45.3192
AGPAT2	45.9971	54.1531	41.7488	28.6829	26.203	25.2496
AGPAT3	13.5218	14.5548	13.3896	29.6014	30.0085	31.7002
AGPAT4	0.208577	0.251993	0.245786	0.274595	0.362945	0.282882
AGPAT4-IT1	0.0137527	0	0.0333121	0	0	0.0299993
AGPAT5	8.73002	9.35874	8.07404	10.2717	9.58321	9.00636
AGPS	6.72542	6.84885	6.17265	9.66684	11.3749	9.79426
AGR2	8.45246	8.3456	8.26542	0.0291151	0	0
AGR3	0	0	0	0	0	0
AGRN	13.2266	17.722	13.4431	31.3856	27.1934	30.0287
AGRP	0	0	0	0.0397342	0.0568952	0.0428153
AGT	0.0575719	0.05483	0.0232793	0.00971724	0	0.0209415
AGTPBP1	4.45597	4.07229	3.77091	10.5576	12.402	10.776
AGTR1	0	0.0256356	0.0408158	0	0	0
AGTR2	0	0	0	0	0.0122744	0
AGTRAP	64.7972	65.5061	63.4175	30.5192	23.9444	28.2703
AGXT	0	0	0	0.016434	0	0
AGXT2	0	0	0.0162452	0	0	0
AHCTF1	10.141	10.2985	10.3664	18.9447	22.8232	19.9365
AHCTF1P1	0.036371	0.0199894	0.00671427	0.046147	0.0387895	0.0536012
AHCY	166.937	164.7	166.553	274.774	273.279	265.126
AHCYL1	19.9272	20.3958	19.3239	46.2234	48.0365	46.3697
AHCYL2	4.39885	4.15158	4.40937	6.70276	7.54233	7.08813
AHDC1	0.452707	0.614913	0.472637	0.503553	0.543466	0.530452
AHI1	1.95962	1.90205	1.96426	3.03157	3.73507	3.50067
AHNAK	151.227	167.684	150.101	95.2188	90.9102	92.7375
AHNAK2	0.104535	0.0830448	0.0943322	0.0400216	0.0480636	0.0306048
AHR	0.143749	0.180633	0.153805	2.10332	2.03903	1.85412
AHRR	0.411844	0.484381	0.430419	1.85363	1.79607	1.95289
AHSA1	94.3306	86.684	93.7592	142.489	163.345	151.736
AHSA2P	21.8729	15.9035	18.5229	19.5364	23.801	23.8077
AHSG	0	0	0	0	0	0
AHSP	0	0.0884689	0	0.0783945	0	0
AICDA	0.127642	0.0659605	0.033072	0.112879	0.0916333	0.0798282
AIDA	27.2998	27.2822	27.5394	52.3814	58.1616	53.341
AIF1	2.38003	2.61335	2.2644	2.22123	2.78203	1.73145
AIF1L	3.9841	3.70765	3.86713	0.491747	0.602081	0.568275
AIFM1	60.4876	57.316	59.3979	108.219	111.224	110.274
AIFM2	3.35318	3.50729	3.20967	22.1159	22.2575	21.7096
AIFM3	0.303779	0.0991924	0.180575	0.0329613	0	0.0118391
AIG1	29.3194	29.7022	28.3257	10.079	11.7517	10.9203
AIM2	6.93558	6.06226	7.3014	11.7999	12.9491	13.5649
AIMP1	28.7208	27.3548	26.6949	43.2676	49.9025	43.1397
AIMP2	23.6076	22.6408	24.5555	42.7264	49.9619	50.1434
AIP	112.923	117.187	113.056	117.037	108.026	103.076
AIPL1	0.0771154	0.101737	0.0530604	0.0813939	0.0907132	0.081816
AIRE	0.0654675	0.0374097	0.0794986	0.0664774	0.110756	0.0719274
AIRN	0	0	0	0	0	0
AJAP1	0.291058	0.346081	0.324239	0	0.0121978	0
AJM1	0.185849	0.185847	0.150297	0.290158	0.258268	0.346458
AJUBA	0.0942558	0.0762723	0.197357	1.05637	0.802496	1.05787
AK1	6.34152	5.82546	6.17781	3.22593	3.41961	4.05262
AK2	263.932	263.487	285	395.706	453.324	442.351
AK3	6.92449	6.9195	7.03484	7.68912	9.05679	8.28065
AK4	7.16181	7.54984	7.08067	0.173611	0.215028	0.187571
AK5	0	0.00837441	0	0.0148415	0.0106258	0.0079962
AK6	48.1106	48.0737	49.7707	66.3094	77.3437	74.8009
AK7	0.209373	0.156379	0.160583	0.118433	0.122737	0.110004
AK8	0.0357281	0.0136106	0.0288935	0.176648	0.189966	0.28591
AK9	1.38272	1.09773	1.30886	2.21576	2.76085	2.34648
AKAIN1	0	0	0	0	0	0
AKAP1	22.6766	23.4354	23.2674	21.0068	21.6163	22.1448
AKAP10	3.69325	3.62555	3.59577	2.89638	3.26	3.16144
AKAP11	4.62968	5.43432	3.97527	7.71854	7.82574	7.47874
AKAP12	0.0114301	0.0163009	0.0312335	0.00583139	0.0248262	0.0311295
AKAP13	6.71505	7.17378	6.64831	15.8755	15.6478	16.0214
AKAP14	0	0	0.058394	0	0	0
AKAP17A	24.536	25.817	23.5526	22.7635	24.0778	23.5171
AKAP2	13.9959	14.9663	13.0042	8.51743	8.97271	9.09858
AKAP3	0.327754	0.310151	0.346999	0.302414	0.255263	0.254333
AKAP4	0	0	0	0	0	0
AKAP5	0.0555022	0.092226	0.0963146	0.120143	0.0818203	0.112322
AKAP6	0.105458	0.146166	0.106152	0.209052	0.208237	0.176292
AKAP7	0.0201527	0.0381732	0.0405183	0.143761	0.0847622	0.0911229
AKAP8	8.81662	9.29436	8.62076	14.8995	14.7487	14.8756
AKAP8L	40.2806	35.3718	40.2773	63.1634	65.9399	69.7282
AKAP9	4.48959	4.58788	4.19066	5.31125	6.35072	5.64061
AKIP1	5.94088	7.03545	6.2874	15.3917	16.3221	15.8645
AKIRIN1	29.1875	30.1694	30.0076	68.2022	77.2535	72.5855
AKIRIN2	10.2712	10.8999	10.6478	21.2942	22.8161	21.9447
AKNA	7.94131	8.23044	7.27036	8.11422	7.61747	8.58304
AKNAD1	0	0	0.0102453	0.0162044	0.0367417	0.00921641
AKR1A1	129.919	133.09	132.907	131.512	109.662	113.781
AKR1B1	75.0562	79.3772	75.429	12.2147	11.4346	12.4526
AKR1B10	0.171729	0.0381358	0.151079	0.130012	0.418614	0.263354
AKR1B15	9.12689	7.38225	9.2197	0.130181	0.32621	0.307531
AKR1C1	0.0435363	0.0269307	0.0283871	0.025324	0	0.0211005
AKR1C2	0.0298891	0.0291288	0.0144392	0	0	0
AKR1C3	0.0996655	0.0962304	0.112754	0.0610399	0	0.0242994
AKR1C4	0	0	0	0	0	0
AKR1C6P	0.0381192	0.0433401	0.0463087	0	0	0
AKR1C8P	0	0	0	0.0117018	0.0502674	0
AKR1D1	0.10631	0.120338	0.104695	0.122364	0.112928	0.142492
AKR1E2	0	0	0	0	0	0
AKR7A2	15.2841	17.1552	17.6467	33.5423	33.5773	33.4433
AKR7A2P1	0	0	0	0.0825542	0.0295349	0.0917134
AKR7A3	0.534655	0.384716	0.353548	0.543329	0.601879	0.633733
AKR7L	0.282781	0.241139	0.218945	1.01602	0.925331	0.882677
AKT1	27.1343	26.9639	27.2171	47.2322	45.6596	47.0891
AKT1S1	37.3421	40.4157	38.6437	62.2658	60.8966	69.7235
AKT2	18.4385	19.2715	18.1843	25.8137	24.274	26.3891
AKT3	0.115809	0.0945372	0.0802759	1.03048	1.276	1.15542
AKTIP	11.9199	12.0223	12.0093	17.9891	18.9378	18.4962
ALAD	7.71975	7.09567	7.19812	11.7233	11.3493	11.478
ALAS1	23.8756	23.3421	22.6949	48.5609	45.7794	48.3176
ALAS2	0.039643	0.0453059	0.0480892	0.0802933	0.0958096	0.0576796
ALB	0.0107274	0	0	0	0	0
ALCAM	1.13828	1.06381	0.935539	1.79942	1.96741	1.76891
ALDH16A1	5.56047	6.5396	5.10304	10.1893	9.42646	9.14498
ALDH18A1	37.2559	36.709	37.2044	42.8692	47.4444	44.7254
ALDH1A1	0.0105157	0	0.0255122	0	0	0
ALDH1A2	0.0228299	0.0173941	0	0.145692	0.121386	0.132869
ALDH1A3	0.0530014	0.0557619	0.0503123	0.0103862	0.0174196	0
ALDH1B1	15.1071	14.8949	15.2466	20.7095	21.6106	20.8664
ALDH1L1	2.89756	2.71889	2.9058	15.2356	14.308	14.9886
ALDH1L1-AS1	0	0	0	0	0	0.105059
ALDH1L1-AS2	0	0	0	0.0109147	0	0
ALDH1L2	8.74187	8.48731	8.22196	0.0883581	0.0508637	0.0516423
ALDH2	2.03266	1.6593	1.98539	2.44613	2.90926	2.65021
ALDH3A1	0	0	0	0.0162612	0	0
ALDH3A2	6.03978	6.13903	6.0474	3.57333	3.81466	3.48448
ALDH3B1	50.1134	54.4167	50.4105	50.4212	46.0683	49.4315
ALDH3B2	0.017961	0	0.0108422	0.0456434	0	0.0592782
ALDH4A1	5.36149	5.75136	5.8366	12.5286	11.3592	12.196
ALDH5A1	2.12412	2.00632	1.79781	0.641143	0.718562	0.571561
ALDH6A1	9.62153	10.0326	9.84218	8.49818	8.34731	8.42707
ALDH7A1	0.0602726	0.0496312	0.0307512	0.0207788	0.04412	0.0329203
ALDH8A1	1.00657	1.12542	1.15804	0.621901	0.583299	0.54327
ALDH9A1	22.9634	22.4767	22.6979	55.7882	61.4284	56.4522
ALDOA	2302.08	2266.14	2161.46	8370.54	7534.34	8024.52
ALDOB	0.174913	0.117588	0.149774	0.552246	0.268559	0.595069
ALDOC	375.207	346.051	359.524	187.96	170.511	180.064
ALG1	15.2579	16.9513	16.3616	10.4065	9.51921	10.2685
ALG10	2.28331	2.48535	2.27186	3.54999	3.45248	3.54113
ALG10B	2.67949	2.81171	2.211	2.24803	2.20754	2.00151
ALG11	2.19191	2.25948	2.01327	2.92252	3.95698	2.98451
ALG12	12.9963	13.3687	12.1193	8.52679	8.15483	7.82807
ALG13	14.1493	13.701	12.9342	18.6232	19.2079	18.7653
ALG14	4.83376	6.56199	5.44248	5.76845	5.99095	5.46798
ALG1L	1.81513	2.61569	2.67231	2.80837	3.12793	2.50098
ALG1L2	1.13604	1.31807	0.628041	0.887007	0.837708	0.899009
ALG1L9P	1.01859	1.10249	0.85709	0.820264	0.919736	0.79943
ALG2	18.5595	20.9545	19.033	23.2007	23.476	23.8024
ALG3	153.759	140.769	166.112	133.333	120.754	135.541
ALG5	67.0246	64.3461	65.1356	44.1297	49.3876	44.5356
ALG6	6.56636	6.74483	5.75714	11.2	11.6482	11.1699
ALG8	86.6709	83.8403	84.9783	59.2696	62.3774	61.3861
ALG9	10.1748	9.56081	9.6944	9.06331	9.57777	9.38855
ALK	0	0	0	0	0	0
ALKAL1	0	0	0	0	0	0
ALKAL2	0	0	0.023086	0.0578192	0.055194	0.0207675
ALKBH1	2.59291	2.9194	3.55307	6.11726	5.54244	6.22483
ALKBH2	40.0508	33.7792	37.0027	40.5885	43.6812	43.4906
ALKBH3	16.6149	15.1717	17.3271	26.436	31.0692	28.2875
ALKBH3-AS1	0	0.0302388	0	0.040193	0.115104	0.0288731
ALKBH4	5.27502	6.16549	5.50365	6.65218	7.24902	6.45946
ALKBH5	70.3625	72.5253	70.6006	60.6537	60.4114	60.3484
ALKBH6	7.47651	6.93557	7.56733	20.8093	20.9914	21.3743
ALKBH7	28.7635	44.0919	29.2197	53.8301	42.9717	40.0905
ALKBH8	1.35451	1.39186	1.36617	1.57627	1.84689	1.6987
ALLC	0	0	0	0	0.0261422	0.0196728
ALMS1	1.32236	1.3143	1.21173	2.77094	3.18925	3.1502
ALMS1-IT1	0.935847	1.0173	1.20619	2.73955	2.37486	3.07964
ALMS1P1	0.0553167	0.0589473	0.0630863	0.0682512	0.147756	0.11325
ALOX12	0.222875	0.266841	0.141617	0.343933	0.477087	0.220046
ALOX12-AS1	2.33853	2.5562	3.03104	3.28752	4.20618	4.59693
ALOX12B	0.139293	0.0682244	0.0844849	0.0705312	0.0577104	0.0868576
ALOX12P2	0.439996	0.465712	0.419266	2.09696	2.27482	2.36133
ALOX15	0.0391207	0.0215884	0.0458829	0	0	0.0317811
ALOX15B	0	0	0.0120379	0.0200994	0	0
ALOX15P1	0.134408	0.0553632	0.470115	0.441528	0.0702469	0.149311
ALOX5	3.50771	3.56939	3.28242	7.0343	7.073	7.55101
ALOX5AP	5.6808	5.22286	6.08268	34.1001	33.5029	36.2594
ALOXE3	0.0900929	0.0772219	0.109288	0.0304125	0.0108869	0.0245781
ALPG	0.00996245	0.0683134	0	0	0	0.0265595
ALPI	0	0	0	0	0	0
ALPK1	1.88894	1.76361	1.80272	5.02468	5.83994	5.47291
ALPK2	0	0.00737241	0.00391266	0.0849273	0.0841894	0.0598353
ALPK3	0.230481	0.219504	0.238166	0.185863	0.148541	0.186303
ALPL	0.0214849	0	0.0130312	0	0	0
ALPP	0.00968655	0.0133769	0.0100164	0	0.0478937	0.0333851
ALS2	1.48894	1.45258	1.43152	3.93447	4.24846	4.069
ALS2CL	1.26141	1.00113	1.16283	0.128151	0.105915	0.105255
ALS2CR12	0.115579	0.198135	0.0876278	0.073155	0.14665	0.0788276
ALX1	0	0	0	0	0	0
ALX3	0.788272	0.962298	0.956218	1.97758	1.221	1.19253
ALX4	0	0	0	0	0.00630848	0
ALYREF	48.1337	50.2821	43.4875	57.9357	52.4212	54.4674
AMACR	1.25979	1.2665	0.904681	0.977949	1.15919	1.03281
AMBN	0.238422	0.143411	0.152221	0.0762478	0.236554	0.0958537
AMBP	0.0549488	0	0	0.204039	0.265602	0.199873
AMBRA1	3.78767	4.01102	3.78539	17.0033	16.5473	17.3014
AMD1	25.5595	26.2412	21.6773	37.971	38.4831	34.3815
AMDHD1	0.353605	0.255941	0.285962	0.310352	0.256379	0.270106
AMDHD2	7.03801	9.46339	6.33004	14.2108	14.3951	13.1963
AMELX	0	0	0	0	0.0608549	0.0457951
AMELY	0.0379994	0.0434275	0	0	0	0
AMER1	1.374	1.39156	1.27089	1.3777	1.45781	1.35818
AMER2	0.0168827	0.0222067	0.0211939	0.0130429	0.03146	0.0296622
AMER3	0.0795314	0.0502568	0.0279316	0.0676444	0.0303944	0.0306988
AMFR	30.3807	31.8584	29.8368	40.7029	40.1993	39.2798
AMH	0.04082	0.0777518	0.049517	0.454725	0.611657	0.60877
AMHR2	0	0	0	0.0458894	0.096673	0.131861
AMIGO1	0.396095	0.400039	0.346397	0.802255	1.03521	0.949906
AMIGO2	0	0	0	0	0	0
AMIGO3	2.49611	3.12302	2.33526	3.32087	2.8034	3.24012
AMMECR1	5.26152	4.7459	4.7169	9.31268	10.0236	9.12286
AMMECR1L	4.09986	4.34794	3.6389	7.22702	7.5773	7.05341
AMN	0	0	0	0	0	0
AMN1	4.3986	4.51546	4.43715	24.9266	29.275	25.1976
AMOT	0.00362845	0.0155273	0.00440151	0	0	0
AMOTL1	1.1445	1.33023	1.1588	0.00539934	0.0270681	0.011641
AMOTL2	0	0.00546365	0	0	0	0
AMPD1	0.175861	0.141869	0.188231	0	0	0.0112885
AMPD2	11.1291	11.7773	11.5599	23.1034	20.1599	23.5373
AMPD3	2.09179	2.18955	2.2485	5.86444	6.14137	6.09021
AMPH	0	0.0168893	0.0268902	0.029932	0.075004	0.064506
AMT	2.99812	2.3913	2.88244	2.51339	2.42334	2.71638
AMTN	0	0	0	0	0	0
AMY1A	0.112634	0.179728	0.115528	0	0	0
AMY1B	0	0	0	0	0	0
AMY1C	0.000606627	0.00116087	0.000839109	0	0	0
AMY2A	0.0338246	0.0354953	0	0.0296333	0	0
AMY2B	2.32876	1.91991	1.74672	1.16294	1.40966	1.25362
AMZ1	0.0155241	0.0354835	0.0220415	0.0659413	0.0460339	0.0189119
AMZ2	76.3408	76.787	80.0713	181.338	218.414	192.367
AMZ2P1	3.99042	4.2829	4.11658	5.88221	7.62833	6.4255
ANAPC1	9.3254	9.72889	9.2135	14.7682	15.6781	16.2516
ANAPC10	5.51071	5.18127	5.26384	11.4404	13.9348	12.0782
ANAPC11	91.2612	103.524	89.518	95.9629	79.4693	82.342
ANAPC13	63.4423	64.2354	62.1312	44.9091	45.1493	43.6344
ANAPC15	54.4046	47.0338	53.1978	35.5085	35.8211	39.5211
ANAPC16	54.5697	53.655	49.851	56.6307	57.7155	52.5739
ANAPC1P1	1.41137	1.50776	1.44694	0.619536	0.512355	0.440188
ANAPC2	16.9185	18.2915	15.7954	15.6133	14.7121	14.9788
ANAPC4	5.84949	5.19982	5.18623	11.878	14.2304	12.0822
ANAPC5	77.6366	77.3715	79.8807	105.83	103.839	102.467
ANAPC7	26.0702	25.0042	24.4139	35.4793	35.6628	34.6556
ANG	21.6283	19.5443	23.2899	12.9452	12.2935	12.1189
ANGEL1	6.04892	6.65992	6.48232	4.2668	3.54915	4.05077
ANGEL2	4.90828	5.00762	4.62194	8.34116	9.26242	8.3201
ANGPT1	0.933721	0.963057	0.913513	0.942273	0.670154	0.741475
ANGPT2	0.0201192	0.0111693	0.0480683	0.0198562	0.0431287	0.0215191
ANGPT4	0.0268841	0.0359122	0.0326844	0.100907	0.0465905	0.069575
ANGPTL1	0	0	0.00828234	0	0	0
ANGPTL2	2.28933	2.51542	2.4557	0.00687956	0	0.00741302
ANGPTL3	0.00832617	0	0	0.00843196	0	0
ANGPTL4	0.91388	1.05914	1.34787	0.335245	0.166969	0.220035
ANGPTL5	0	0	0	0	0	0
ANGPTL6	0.333507	0.340377	0.533874	1.5738	1.58269	1.51729
ANGPTL7	0	0	0.0131857	0	0	0.0118615
ANGPTL8	0	0.038007	0.0806837	0.134716	0.0482246	0.0725809
ANHX	0	0	0	0	0	0.0159669
ANK1	0	0.0270525	0.0132505	0	0	0
ANK2	0.104976	0.067764	0.112648	0.0515351	0.0574435	0.0402913
ANK3	0.808147	0.789551	0.752615	0.00661198	0.00473383	0.0142494
ANKAR	0.34554	0.357878	0.386413	0.114821	0.101779	0.0765913
ANKDD1A	4.48005	3.84582	3.81306	12.6983	11.3018	11.8157
ANKDD1B	1.45097	1.43565	1.42935	0.61143	0.69193	0.488818
ANKEF1	2.86225	2.67131	2.49873	7.11867	8.2103	7.90583
ANKFN1	0.041156	0.105829	0.0499246	0	0	0
ANKFY1	3.26552	3.07804	3.02196	6.22882	6.48663	6.49853
ANKH	11.1706	11.1277	11.5193	16.4253	16.6025	16.5799
ANKHD1	20.9569	19.6898	19.3157	35.2248	40.6497	35.0227
ANKHD1-EIF4EBP3	3.54878	4.44187	4.76933	6.92373	6.99033	8.04068
ANKIB1	10.9387	11.8157	10.2213	14.9754	15.9129	14.6658
ANKK1	0.048892	0.0570516	0.0711868	0.0603392	0.0288071	0.129012
ANKLE1	2.90229	2.91657	2.459	6.1208	5.71662	6.95835
ANKLE2	6.09609	5.73673	5.20358	12.3903	12.6957	12.3741
ANKMY1	4.57182	4.39851	4.14805	6.02803	5.78999	6.62109
ANKMY2	4.63498	4.06957	4.23741	13.0821	14.5507	13.1356
ANKRA2	9.29613	9.47126	9.20492	12.6761	12.9815	12.0705
ANKRD1	0.0777764	0.0592813	0.0475587	0.121906	0.136226	0.116146
ANKRD10	28.3449	26.6477	26.9304	52.8199	58.6435	53.1978
ANKRD11	14.1275	15.2011	13.9995	19.9418	20.542	21.0777
ANKRD12	7.87659	7.95107	7.19455	7.66269	9.11218	7.79459
ANKRD13A	16.6583	17.0799	15.4154	25.2831	28.2579	25.9994
ANKRD13B	2.92141	2.96388	3.01643	7.89456	7.37758	8.69817
ANKRD13C	2.34026	2.61247	2.25588	4.00783	4.50861	3.73945
ANKRD13D	14.1055	14.9267	13.3635	16.4755	15.9929	16.5295
ANKRD16	4.39313	4.54493	5.06052	5.09407	5.59959	5.42388
ANKRD17	7.93271	8.01103	7.3111	13.4584	14.5297	13.8566
ANKRD18A	2.99996	2.43387	2.80398	1.1898	1.55755	1.30843
ANKRD18B	0.0297164	0.108231	0.0752245	0.533839	0.769032	0.677759
ANKRD18CP	0.127511	0.162816	0.147045	0.168717	0.189214	0.246999
ANKRD18DP	0.0168112	0.0672441	0.0203929	0.00851238	0.0121888	0.0183449
ANKRD19P	0.354892	0.40237	0.182333	0.081898	0.139546	0.066498
ANKRD2	0	0.0221922	0	0	0	0
ANKRD20A1	0	0.00990552	0	0	0	0
ANKRD20A11P	0.124275	0.0508201	0.0159473	0.0368362	0.0222398	0.0518807
ANKRD20A12P	0.702843	0.974256	0.795232	0.739675	0.580662	0.450814
ANKRD20A19P	0.0857121	0.0649384	0.0986057	0.0424442	0.0323417	0.020607
ANKRD20A2	0	0	0	0	0	0
ANKRD20A3	0.177798	0.19701	0.0813937	0.136552	0.0601853	0.083812
ANKRD20A4	0	0	0	0	0	0.0149247
ANKRD20A4-ANKRD20A20P	0.0813201	0.0592752	0.0477966	0.0680224	0.107407	0.0397614
ANKRD20A5P	0.294124	0.291994	0.353115	0.0626875	0.13658	0.145403
ANKRD20A8P	0.00694614	0.00934141	0.00955643	0	0.0229396	0
ANKRD20A9P	0.181847	0.280624	0.174209	0.0399996	0	0.0303318
ANKRD22	0.0120789	0.0207157	0.0219785	8.41599	9.48011	8.20711
ANKRD23	2.01165	1.69689	2.03354	3.05581	3.00041	3.13597
ANKRD24	1.01984	0.95423	0.962209	1.36499	1.54805	1.5294
ANKRD26	0.917939	0.824315	0.777875	2.89667	3.58952	3.23908
ANKRD26P1	0.0154275	0.0264469	0.0140358	0.0156235	0.0111856	0.00420874
ANKRD26P3	0.0649663	0.0371233	0.0472847	0.00657918	0.00942069	0
ANKRD27	4.33864	4.28254	4.09563	14.9345	16.0521	14.7021
ANKRD28	14.4783	14.2709	13.1478	38.1742	39.4701	37.5526
ANKRD29	0.0149129	0.0255647	0.0271352	2.86438	3.18292	3.31943
ANKRD30A	1.52986	1.50959	1.43874	0.00561458	0.0635033	0.0297875
ANKRD30B	0.663863	0.586802	0.522189	0.667045	1.00026	1.04137
ANKRD30BL	0.225687	0.279583	0.166706	0.0201263	0.0434117	0.0489546
ANKRD30BP2	0.87349	0.941545	1.00541	2.53544	3.23128	2.77647
ANKRD30BP3	0.0202417	0	0.0245544	0.0819956	0.234818	0.0441769
ANKRD31	0.00785117	0	0	0	0.00569244	0
ANKRD33	0	0	0	0	0	0
ANKRD33B	1.8363	2.08141	1.89888	2.67513	2.64461	2.86888
ANKRD34A	5.10601	5.14887	4.90652	2.77808	2.93263	3.12461
ANKRD34B	0.164846	0.132574	0.170343	0	0	0
ANKRD34C	0.109258	0.0849085	0.0901247	0.0132776	0	0
ANKRD34C-AS1	0	0	0	0	0	0
ANKRD35	0	0.00900509	0	0	0	0
ANKRD36	1.22513	1.03713	1.24937	2.08404	3.14607	2.58271
ANKRD36B	3.64795	2.40989	2.81344	4.15417	4.16575	3.97862
ANKRD36BP1	1.50109	2.16968	1.39291	3.21378	2.7254	2.76366
ANKRD36BP2	25.0923	22.4009	25.7075	5.42804	7.16954	6.73494
ANKRD36C	0.878574	0.853957	0.811256	1.09767	1.33168	1.23203
ANKRD37	15.5318	16.2283	17.2348	61.9897	57.7523	60.8844
ANKRD39	22.2086	23.4766	20.4871	36.4785	32.855	33.6419
ANKRD40	10.2026	10.4583	9.87636	14.6259	14.4092	13.8109
ANKRD42	2.03052	1.93941	1.91441	4.79312	4.63308	4.25798
ANKRD44	7.41826	7.89642	7.56586	4.23966	4.14287	4.09044
ANKRD44-IT1	0.343453	0.121639	0.148732	0.21921	0.194319	0.0880809
ANKRD45	0.111509	0.118538	0.146445	0.0942458	0.188311	0.122544
ANKRD46	9.33387	9.92137	8.16955	8.87821	9.13193	7.89859
ANKRD49	10.0156	9.54869	9.02348	4.97725	5.81709	4.97184
ANKRD50	0.516496	0.548095	0.436679	0	0	0
ANKRD52	2.76362	2.78682	2.58005	10.5638	9.80262	11.4953
ANKRD53	0.0127724	0.0291937	0.0309872	0.0258693	0	0.0278753
ANKRD54	9.19396	8.95335	9.52574	15.7402	15.9458	16.6495
ANKRD55	0.0696463	0.0568537	0.0603464	0.433263	0.649242	0.445145
ANKRD6	0.095164	0.129539	0.134031	0.0765353	0.0274203	0.0878191
ANKRD60	0.0803151	0.0514635	0.0624557	0.141501	0.0560411	0.101508
ANKRD61	0.111865	0.0639222	0.135698	0.226572	0.270356	0.162761
ANKRD62	0.089033	0.0696329	0.044356	0.0792673	0.0666629	0.0685697
ANKRD62P1-PARP4P3	0	0.0416526	0.0427016	0	0	0.0189575
ANKRD63	0.0170615	0.0129992	0.0206966	0	0	0
ANKRD65	0.153491	0.277448	0.168517	0.336756	0.230582	0.239354
ANKRD66	0	0	0	0	0	0
ANKRD7	0.0395403	0.0225943	0	0	0	0
ANKRD9	0.137664	0.106757	0.0954353	0.33861	0.278078	0.295113
ANKS1A	4.94303	5.21949	4.55583	5.19808	5.26792	5.81236
ANKS1B	0.0186974	0	0.022681	0.0284024	0.0271128	0.0102016
ANKS3	6.087	6.26775	5.43921	8.37581	7.5857	7.08955
ANKS4B	0.0911393	0.0793978	0.107293	0.18614	0.238986	0.141228
ANKS6	0.970583	0.981817	0.910872	0.793637	0.827341	0.955367
ANKUB1	0.0100298	0.0114474	0	0.020249	0.043494	0
ANKZF1	27.039	26.2715	26.5409	42.5407	45.5429	44.1196
ANLN	2.468	2.44477	2.36628	6.9032	8.16344	7.61798
ANO1	0.0496826	0.0340678	0.0327199	0	0.00720442	0
ANO10	6.87805	6.55639	6.89549	29.4006	31.4304	27.7872
ANO2	0.00652436	0.0149126	0	0.00660725	0.0378434	0.0142391
ANO3	0	0	0	0.0615549	0.0934453	0.0608645
ANO4	0.126595	0.151912	0.145888	0	0	0
ANO5	0.0177349	0	0.012908	0.00718412	0.0102868	0.00774114
ANO6	7.78484	8.14286	6.9711	25.8712	27.187	27.037
ANO7	0.134134	0.100107	0.134472	0	0	0.0191054
ANO8	2.26082	2.76911	2.00604	9.83796	9.11456	9.38998
ANO9	7.56971	7.87242	6.91819	36.3073	33.3891	36.5616
ANOS1	0.0112212	0	0.0362984	0	0	0
ANP32A	94.0177	89.8098	91.4266	146.057	161.378	155.866
ANP32A-IT1	0.303979	0.363818	0.355751	0.595348	0.736218	0.767238
ANP32AP1	0	0.164891	0	0.0509834	0	0.112728
ANP32B	143.364	136.807	134.371	227.122	240.062	233.254
ANP32C	0.0494757	0.0552137	0.0609722	0	0.22249	0
ANP32D	0.902679	0.277313	0.619448	1.16754	1.6772	0.885604
ANP32E	39.7349	42.5831	32.8777	61.3201	61.0602	58.2459
ANPEP	0.110006	0.177487	0.164842	0.104851	0.0656841	0.0988584
ANTXR1	0.0156087	0	0.00486787	0	0	0.00437901
ANTXR2	6.26682	6.76824	6.16024	5.54776	6.09127	6.71745
ANTXRL	0	0	0	0	0	0
ANTXRLP1	0	0	0	0	0	0.0318119
ANXA1	72.5401	72.2694	69.8063	146.103	164.395	145.05
ANXA10	0	0.020983	0	0.0185936	0	0
ANXA11	107.869	105.79	107.544	173.97	172.79	183.177
ANXA13	0.017478	0.0199747	0.0636053	0	0	0
ANXA2	167.766	157.917	169.015	822.419	876.45	840.347
ANXA2P1	0.0890245	0.135229	0.0293809	0.572111	0.289555	0.433388
ANXA2P2	0.119013	0.228469	0.276901	0.298091	0.22475	0.380842
ANXA2P3	0	0.0230333	0.0242459	0.0608004	0.0579205	0.0435501
ANXA2R	9.19937	8.38171	9.77086	10.8403	9.92807	9.94614
ANXA3	0.20758	0.328475	0.174327	0	0.0231545	0.0174245
ANXA4	10.8309	10.8962	10.4098	74.2451	73.5135	74.6765
ANXA5	59.5915	55.7733	57.3661	182.088	227.318	194.067
ANXA6	19.4253	18.2233	20.0273	25.0058	26.5566	26.4876
ANXA7	45.3109	47.3732	45.7814	105.58	104.924	100.21
ANXA8	0	0	0	0	0.0194764	0.0146566
ANXA8L1	0	0	0	0	0	2.2788e-10
ANXA9	3.40081	3.91846	3.48289	2.73827	2.4051	2.7681
AOAH	0	0.0122083	0.0372095	0.0432723	0.092942	0
AOAH-IT1	0	0	0	0	0	0
AOC1	0.122369	0.19812	0.173181	0.464715	0.502764	0.612028
AOC2	1.43768	1.58329	1.28013	4.16329	4.40464	4.2318
AOC3	1.34954	1.15411	0.93824	3.46928	3.64058	3.73206
AOC4P	0.0435236	0.0220527	0.0360587	0.0743365	0	0.0376901
AOX1	0.00482392	0	0	0	0	0
AOX3P-AOX2P	0.0789762	0.100353	0.0754301	0	0	0
AP1AR	3.17698	3.51429	2.75521	7.34611	7.89553	6.71214
AP1B1	21.8339	22.8808	22.5351	43.3452	40.6134	42.5195
AP1B1P1	0	0	0	0	0	0
AP1G1	18.1693	18.2375	17.1429	30.2793	33.0592	31.4635
AP1G2	9.13205	8.63665	8.23439	9.67507	10.717	10.7163
AP1M1	31.6196	34.5969	30.864	67.9933	61.3182	66.9229
AP1M2	0.0147165	0	0	0	0	0
AP1S1	52.5666	55.6178	52.5687	82.3541	76.5519	74.6335
AP1S2	30.7208	31.4057	27.7659	40.8052	44.2019	37.0269
AP1S3	0.763701	0.699207	0.562461	4.21826	4.4848	4.18832
AP2A1	16.8369	18.2556	16.6836	44.7087	42.057	43.7953
AP2A2	7.42568	7.63949	7.13403	28.8383	27.3177	28.5439
AP2B1	27.1704	27.3562	27.7416	55.9136	57.6159	56.0807
AP2M1	186.465	177.607	182.296	260.039	240.708	249.947
AP2S1	66.9523	73.939	71.7752	125.325	110.961	116.663
AP3B1	29.8485	31.2803	30.9056	41.5114	46.9271	43.2436
AP3B2	0.0888085	0.108688	0.039006	0.0728279	0.117363	0.134782
AP3D1	30.2834	34.3835	28.5668	66.0857	60.5007	66.2102
AP3M1	9.44639	9.59103	9.84315	15.2504	17.0318	16.4454
AP3M2	2.74295	2.72954	2.78361	4.36317	4.76331	4.6285
AP3S1	114.272	114.395	104.232	178.009	204.721	184.151
AP3S2	10.7391	11.0122	11.0791	18.8205	20.4248	19.68
AP4B1	6.92303	6.20734	6.39831	13.2873	13.0613	12.1526
AP4B1-AS1	0.240682	0.251845	0.596511	0.679246	0.748914	0.926745
AP4E1	1.78299	1.84049	1.75996	4.95821	5.37881	5.10707
AP4M1	9.32582	10.6249	8.27771	15.4629	12.8141	12.9363
AP4S1	0.56986	0.659705	0.463656	0.948287	0.931829	0.908384
AP5B1	7.34101	7.9395	7.38973	13.0378	12.968	13.522
AP5M1	7.89078	7.74621	7.21579	9.14872	10.5467	9.6484
AP5S1	2.31038	2.23647	2.37758	7.34955	6.36523	6.44672
AP5Z1	4.48874	4.99119	4.27723	10.6984	9.80804	10.1735
APAF1	1.09598	1.07104	0.96786	4.83886	5.72614	4.47033
APBA1	5.16039	5.37721	4.76419	0	0.0103769	0.0117169
APBA2	0.0536299	0.0443243	0.045753	0	0	0.0084645
APBA3	5.22838	6.64361	5.23561	15.5291	12.1272	15.0357
APBB1	0.050332	0.0455951	0.0668805	0.0111669	0	0.014512
APBB1IP	29.7598	29.5187	30.2022	24.5631	27.0001	25.9697
APBB2	7.38275	7.76571	7.01703	0.678174	0.620248	0.618908
APBB3	8.45248	7.54773	7.23557	14.2172	12.4688	13.8445
APC	2.25721	2.28901	2.27597	4.65271	5.46773	5.10836
APC2	0.530636	0.630587	0.478497	0.920201	0.776279	0.853199
APCDD1	3.18673	3.4769	3.28174	0.0097499	0	0
APCDD1L	0	0	0	0	0	0
APCDD1L-DT	0.0120598	0.0137825	0	0	0.0174878	0.0263201
APCS	0	0	0	0	0	0
APEH	71.6318	71.1699	73.751	78.244	73.264	74.1485
APELA	0.0472836	0.108076	0.0460533	0.114922	0.0822784	0.19607
APEX1	129.243	126.369	132.675	148.707	149.617	155.507
APEX2	19.1726	19.1272	18.8977	34.841	31.4752	36.3033
APH1A	113.283	118.413	111.259	149.868	130.208	136.518
APH1B	0.0354061	0.00674396	0	0.318588	0.298593	0.249667
API5	21.2599	20.9914	20.3722	55.6224	59.9592	53.5584
APIP	17.9342	18.336	16.8667	40.2713	40.8317	38.9238
APLF	0.849115	0.670724	0.787666	1.97904	2.52596	2.25514
APLN	1.75679	1.86125	1.92986	0.916279	1.07148	0.962647
APLNR	0	0.00706605	0	0.0130879	0	0.0141027
APLP1	0.336466	0.248811	0.264148	1.7638	1.69363	1.9008
APLP2	36.4599	38.3657	37.9978	68.2645	69.8404	68.9832
APMAP	69.221	70.6227	70.7215	88.3522	86.5159	87.2707
APOA1	0	0.03515	0	0	0	0
APOA1-AS	0.0629495	0	0	0	0	0
APOA2	0.0836264	0.0955722	0.202887	0.508133	0.606328	0.45628
APOA4	0.018171	0.0207667	0.0661274	0.441645	0.526991	0.436234
APOA5	0	0	0	0	0	0
APOB	0	0	0	0	0	0
APOBEC1	0	0	0.0413009	0	0	0
APOBEC2	0	0.0362698	0.0577469	0	0.0920409	0.0519476
APOBEC3A	0.635357	0.306666	0.612628	0.460671	0.526101	0.470473
APOBEC3A_B	0	0	0	0	0	0
APOBEC3B	49.9646	48.6696	52.368	79.4383	86.139	86.816
APOBEC3B-AS1	0.266036	0.32766	0.470507	0.184524	1.49932	0.680271
APOBEC3C	27.9375	28.1122	28.5665	67.3533	65.9893	70.2946
APOBEC3D	1.68947	1.65719	2.104	3.00984	6.41486	5.51856
APOBEC3F	5.01659	5.57922	5.02274	9.10161	10.3062	9.93884
APOBEC3G	25.3125	24.1334	25.8609	32.3158	36.3211	35.6507
APOBEC3H	0.290388	0.271705	0.288192	2.24428	2.37369	2.3005
APOBEC4	0	0	0	0	0	0.0096653
APOBR	0.15312	0.160342	0.0541522	1.12375	0.934012	1.20407
APOC1	0.148602	0.807819	0.714538	0	0	0.128556
APOC1P1	0.135652	0.179864	0.0760675	0	0.0779216	0
APOC2	0	0	0	0	0	0.0927797
APOC3	0	0	0	0	0	0
APOC4	0	0	0	0	0	0
APOC4-APOC2	0.0302746	0.0337324	0	0.0447803	0	0
APOD	0.665498	0.634664	0.556496	0.0244518	0	0
APOE	0.25794	0.162651	0.349123	0.448401	0.447151	0.404829
APOF	0.257172	0.224323	0.201139	0.22932	0.153629	0.197313
APOH	0	0	0	0	0	0
APOL1	4.80672	5.12804	4.73564	180.577	186	191.627
APOL2	21.5811	19.2427	19.7522	53.5045	52.0356	53.2711
APOL3	2.90916	3.12933	2.85312	5.2545	4.93635	5.2972
APOL4	0.976384	1.08508	0.802178	1.03112	1.08989	0.990024
APOL5	0	0	0	0	0	0
APOL6	5.90104	6.23389	5.70974	6.63699	7.17159	6.83961
APOLD1	1.12471	1.1075	0.999317	0.583581	0.704847	0.816894
APOM	11.5985	12.7506	10.8994	6.86467	7.10674	7.54758
APOO	22.6899	19.989	21.5129	58.6203	71.5011	64.0249
APOOL	3.03612	3.10768	2.86114	5.90601	5.65675	5.49549
APOOP5	0	0	0	0	0	0
APOPT1	16.1324	16.8211	16.3442	26.0967	29.1489	25.478
APP	153.017	152.713	144.748	234.616	234.694	238.126
APPBP2	4.45451	4.73536	4.46072	4.89185	5.51566	5.25235
APPL1	9.26985	10.6136	8.74358	22.9945	25.1006	22.6582
APPL2	7.79173	7.95885	7.64334	23.1494	26.003	25.2376
APRT	221.287	275.761	208.708	355.756	288.002	278.86
APTR	9.95853	9.95524	8.47833	8.41376	9.96262	8.60673
APTX	20.1278	20.329	20.0153	21.4353	23.5064	21.1412
AQP1	0.0275294	0.0289357	0.0333947	0.0464653	0.0611911	0.030041
AQP10	0	0	0	0	0	0
AQP11	0.293163	0.187623	0.1138	0.166257	0.255067	0.115167
AQP12A	0	0	0	0	0	0
AQP12B	0	0	0	0	0	0
AQP2	0	0	0	0	0	0
AQP3	4.73793	4.07661	4.54175	2.57831	1.87555	2.58549
AQP4	0.0586718	0.0628986	0.0278178	0	0	0
AQP4-AS1	0.499885	0.287508	0.275833	0.0871906	0.114397	0.132001
AQP5	0	0	0	0	0	0
AQP6	0.0424184	0.071609	0.0286434	0.0843978	0.0381901	0.0416939
AQP7	0.018629	0.0248687	0.105586	0.0188657	0	0.0107767
AQP7P1	0.0230597	0.0351383	0.0186485	0	0.0334385	0.0129689
AQP7P3	0.188331	0.143489	0.152304	0	0	0
AQP8	0	0.0234649	0	0	0.0297731	0
AQP9	0.00875569	0	0.0112669	0.0188121	0.0404055	0.0202709
AQR	7.98498	7.60468	7.97557	12.3235	14.2739	13.5594
AR	0.0336031	0.0549054	0.010751	0.0246218	0.0113585	0.0213742
ARAF	25.2036	24.9354	23.2952	34.1343	33.0393	35.3912
ARAP1	18.1021	18.8735	16.9946	21.8827	19.1935	21.3578
ARAP1-AS2	0.0444205	0.0345251	0.036523	0.109392	0.106929	0.0337699
ARAP2	0.826108	0.835314	0.789013	1.69329	1.96154	1.9221
ARAP3	0.0495966	0.0206114	0.0437553	0.00456607	0.00653813	0
ARC	0.275064	0.381037	0.232556	0.0337647	0.0362606	0.0272872
ARCN1	78.2513	77.4024	75.736	100.562	104.276	103.609
AREG	0.0840096	0.0240026	0.0254771	0	0	0.0458371
AREL1	4.39404	4.3628	4.59903	9.56323	9.36126	9.7376
ARF1	595.363	621.195	586.385	743.341	711.76	725.774
ARF3	27.3639	26.842	25.8912	51.1168	47.2519	51.6916
ARF4	185.058	184.013	172.229	258.661	255.691	252.768
ARF4-AS1	9.29863	12.8636	10.2473	8.109	9.58924	9.06041
ARF5	155.67	163.543	159.088	126.475	114.608	123.069
ARF6	20.7565	21.8247	21.121	47.0486	48.6018	47.3798
ARFGAP1	19.0882	19.9708	17.4874	47.2773	42.3893	43.7935
ARFGAP2	55.8383	57.8751	54.4319	49.0718	44.5286	46.5481
ARFGAP3	45.3846	44.3853	46.1061	44.9308	52.1413	47.2206
ARFGEF1	2.7275	2.94601	2.62952	5.54739	6.61704	6.08055
ARFGEF2	11.5076	11.929	10.4774	17.7442	17.7813	17.3169
ARFGEF3	1.43008	1.84282	1.4225	5.24882	5.28289	5.31444
ARFIP1	5.61841	6.25586	4.60643	9.89679	10.5532	9.03342
ARFIP2	17.5401	16.9843	17.1871	22.5767	22.5688	22.8198
ARFRP1	9.51856	10.627	8.92966	16.876	14.8047	15.1357
ARG1	0.0538722	0.0205226	0.0217833	0.0545566	0.104159	0.0195957
ARG2	25.986	24.8143	24.2258	46.8758	51.2496	46.1111
ARGFX	0.257437	0.356403	0.324061	0.361927	0.567087	0.521988
ARGFXP2	0.135508	0.128872	0.0549414	0.205554	0.621367	0.196883
ARGLU1	31.2167	29.6162	30.3931	35.5669	41.1268	40.2959
ARHGAP1	33.1193	31.9998	31.9153	45.7008	41.1364	47.7091
ARHGAP10	11.6242	10.4966	11.3445	15.5021	16.3937	15.8777
ARHGAP11A	6.79765	7.64922	7.05024	13.9571	14.9519	14.5827
ARHGAP11B	1.03388	1.05522	0.809722	2.74407	2.48102	2.6016
ARHGAP12	2.23225	2.01014	1.7329	5.48642	5.96999	5.22948
ARHGAP15	10.242	10.2586	10.0593	0.0736659	0.0632891	0.0158756
ARHGAP17	13.818	14.3729	13.858	38.1758	37.9894	38.8346
ARHGAP18	6.19306	6.78447	6.30952	15.6197	17.1564	15.5216
ARHGAP19	2.97814	2.9506	2.61596	8.97888	9.54918	9.07888
ARHGAP19-SLIT1	0	0	0	0	0	0.0312959
ARHGAP20	0	0	0	0	0	0
ARHGAP21	6.55331	6.4736	5.74133	11.4197	12.447	12.6273
ARHGAP22	2.7295	2.7835	2.63945	0.0132146	0.0189218	0.0289437
ARHGAP22-IT1	0	0	0	0	0	0
ARHGAP23	1.70028	1.9844	1.69283	0.0162441	0.00581498	0.0175038
ARHGAP24	3.59547	3.69679	3.50819	0.359244	0.401058	0.446159
ARHGAP25	0.279952	0.331959	0.282128	0.227126	0.337256	0.305493
ARHGAP26	9.44055	9.29451	9.20545	3.77986	4.25649	4.00803
ARHGAP26-AS1	0	0	0.035681	0	0	0
ARHGAP26-IT1	0	0	0	0	0	0
ARHGAP27	4.60939	4.55109	4.28449	7.8301	7.56879	8.22427
ARHGAP27P1	1.87088	1.61827	1.3623	2.08234	2.42999	2.53609
ARHGAP27P1-BPTFP1-KPNA2P3	1.75486	1.43778	1.51493	2.12472	2.54297	2.65874
ARHGAP27P2	0.0470506	0.0716955	0.0761	2.66831	3.4796	2.9779
ARHGAP28	0.0428853	0.0245057	0.0312134	0	0	0
ARHGAP29	0	0	0	0.00271718	0	0.00585577
ARHGAP30	6.98662	7.42642	7.38764	8.13982	7.30702	8.08957
ARHGAP31	0.0304926	0.0268855	0.032222	2.72122	2.82845	2.86521
ARHGAP31-AS1	0	0	0	0.109199	0.0781806	0.117666
ARHGAP32	0.470964	0.464586	0.478092	0.740524	0.819526	0.84934
ARHGAP33	0.847402	1.0171	0.950908	1.73767	1.60817	1.65469
ARHGAP35	2.83079	3.33008	2.81212	6.33402	5.93936	6.76676
ARHGAP36	0	0	0	0	0	0.0105681
ARHGAP39	0.679187	0.700338	0.69329	0.20144	0.266258	0.233853
ARHGAP4	53.9893	65.2244	52.8278	55.952	49.0097	50.154
ARHGAP40	0.00868269	0	0.0105326	0.105516	0.100725	0.246346
ARHGAP42	0.876747	0.868198	0.817498	0	0	0.00311733
ARHGAP44	0.0564684	0.0215116	0.0532773	0.0635399	0.036393	0.0616202
ARHGAP45	39.3413	51.5168	37.0246	55.6141	47.0576	46.3804
ARHGAP5	2.22945	2.33059	1.78227	9.93416	11.0764	9.94636
ARHGAP5-AS1	0.783553	0.798673	0.924805	4.99696	4.48346	5.43066
ARHGAP6	8.70535	9.06205	7.76613	6.00198	6.62186	6.47828
ARHGAP8	5.67583	5.98017	5.438	0.446248	0.486924	0.277008
ARHGAP9	1.07606	0.953712	1.01535	0.390396	0.413118	0.277025
ARHGDIA	153.119	177.213	155.216	240.486	213.023	243.132
ARHGDIB	433.555	430.742	468.402	154.302	155.19	159.639
ARHGDIG	3.85492	3.6302	2.99279	0.0312312	0.134159	0.168265
ARHGEF1	18.5541	20.7144	17.9944	51.215	48.1977	48.989
ARHGEF10	0.00433232	0	0.00525535	0.0472427	0.025129	0.0283654
ARHGEF10L	1.10237	1.35625	1.02353	2.4198	2.37021	2.26624
ARHGEF11	1.92773	1.91124	1.80059	10.8238	10.1815	11.2617
ARHGEF12	4.36973	4.84411	4.07819	10.3512	10.8786	10.2841
ARHGEF15	0	0	0	0	0.00839696	0
ARHGEF16	0.311693	0.336962	0.235036	0.0853116	0.0488629	0.0643489
ARHGEF17	0.0330297	0.0411796	0.0364245	0.17637	0.182876	0.167109
ARHGEF18	4.24898	4.90257	3.63603	10.4979	9.60045	9.79811
ARHGEF19	4.01968	3.87246	3.93433	5.40808	4.93456	4.90106
ARHGEF2	50.0049	52.6453	51.5469	77.6153	79.4514	82.7442
ARHGEF25	2.13185	1.73061	1.70501	3.19094	3.22903	3.23184
ARHGEF26	0.0831226	0.100652	0.108318	0.080141	0.133784	0.126361
ARHGEF26-AS1	0.855118	0.791157	0.98644	0.602183	0.950399	0.746668
ARHGEF28	0.0136175	0.00859711	0.00550625	0.0190453	0.00658216	0.00495327
ARHGEF3	25.2228	25.6125	24.7474	13.1157	14.0332	13.6952
ARHGEF33	0.00556561	0	0	0	0.00807063	0.00607339
ARHGEF34P	0	0	0	0	0	0
ARHGEF35	0.0201439	0	0.0244356	0	0.0146052	0
ARHGEF37	0.00491077	0.00561226	0.00595704	0.00994632	0.00712104	0.0214352
ARHGEF38	0.026482	0.00505076	0.0221655	0	0	0
ARHGEF38-IT1	0	0.101894	0	0	0	0
ARHGEF39	2.56152	2.30919	2.44532	3.84044	3.7678	3.55344
ARHGEF3-AS1	0	0	0	0	0	0
ARHGEF4	0.768325	0.74629	0.650169	0.0866595	0.0477259	0.0420919
ARHGEF40	1.95511	1.95473	1.91619	2.38534	2.14601	2.06849
ARHGEF5	0	0.00529392	0	0	0	0
ARHGEF6	0.0221237	0.0401541	0.0266185	0.0793729	0.116498	0.0986063
ARHGEF7	4.89866	5.29058	5.08826	11.2765	11.9375	11.9478
ARHGEF7-AS1	0	0	0	0	0	0
ARHGEF7-AS2	0	0	0	0	0	0
ARHGEF9	5.62547	5.68868	5.08328	2.80276	3.06073	3.02685
ARHGEF9-IT1	0	0	0	0	0	0
ARID1A	14.9405	16.4409	14.8126	21.6524	20.0195	22.434
ARID1B	6.63827	6.93789	6.25161	7.68809	7.50845	7.86463
ARID2	3.86608	3.83728	3.53506	4.6243	5.28649	5.11076
ARID3A	4.30504	5.63854	4.84091	11.8058	11.3204	11.8446
ARID3B	15.9038	16.6959	15.8899	29.0302	27.1296	29.832
ARID3C	0.506744	0.302155	0.427624	0.379309	0.351437	0.312552
ARID4A	2.50727	2.6081	2.25375	3.7253	4.24172	3.81589
ARID4B	5.03153	5.46877	4.70169	9.45984	10.1996	9.15543
ARID5A	133.214	155.069	128.819	96.3055	86.7456	87.6891
ARID5B	0.430467	0.314257	0.398648	0.489022	0.476544	0.561579
ARIH1	19.5001	19.6298	19.5413	39.0378	42.1825	40.1507
ARIH2	58.5689	54.0295	52.3458	55.4325	56.4668	54.6791
ARIH2OS	2.7698	2.6614	3.03033	2.53825	2.57984	2.37233
ARL1	29.3534	28.6074	28.5376	44.4036	51.3198	45.282
ARL10	0.166339	0.224609	0.255612	0.130446	0.242271	0.18785
ARL11	0.950784	0.87802	0.925915	1.95951	1.82845	2.01811
ARL13A	0	0.0280673	0	0.0497422	0.0247961	0.0746392
ARL13B	0.657215	0.686566	0.552346	1.94045	2.166	1.8935
ARL14	0.0201704	0	0	0.102134	0.0584978	0.242117
ARL14EP	10.2256	9.68291	10.2524	14.9943	17.1294	15.7445
ARL14EPL	0	0.0591124	0	0.104762	0.150008	0.0564427
ARL15	0.467828	0.750794	0.519204	2.52006	3.17545	2.60686
ARL16	15.3909	16.3772	14.1462	18.077	19.0193	17.7011
ARL17A	5.32929	4.80876	4.92386	10.4385	13.3411	11.273
ARL17B	5.54044	6.17965	6.45337	17.6949	19.9311	19.2445
ARL2	94.687	104.037	98.8492	177.743	153.601	166.817
ARL2BP	44.9715	48.5578	44.4495	91.574	94.4193	92.7034
ARL2-SNX15	0.453064	0.963425	0.49888	0.645987	2.57612	2.25341
ARL3	3.90996	3.9649	3.68148	5.29838	6.29977	5.56024
ARL4A	6.43598	6.76842	6.1171	7.70988	8.33645	8.18379
ARL4C	2.64557	2.53492	2.56242	2.9241	3.06642	3.02041
ARL4D	0.947249	1.23188	0.93114	0.0165394	0.0473653	0.0356438
ARL5A	11.6742	13.0907	9.82686	12.5947	10.0811	9.93038
ARL5B	3.60312	3.45926	2.85102	8.27477	8.29026	7.36205
ARL5C	0	0	0	0	0	0
ARL6	0.855508	0.976118	1.06227	1.29031	1.97693	1.40363
ARL6IP1	92.7563	97.3508	88.8108	26.7147	27.18	25.7162
ARL6IP4	132.2	149.268	132.442	136.105	128.494	127.97
ARL6IP5	125.8	132.314	116.523	93.658	92.7638	83.304
ARL6IP6	7.14521	7.91585	5.49844	10.986	9.9172	8.89829
ARL8A	18.036	18.8784	18.215	63.4848	61.1624	66.4096
ARL8B	16.9915	16.0626	14.8131	59.9656	68.3343	60.0847
ARL9	0.179856	0.164438	0.130905	0.182141	0.260807	0.235518
ARMC1	8.83766	9.38475	8.10865	21.5881	21.8211	19.6649
ARMC10	45.5186	45.906	44.8433	35.3549	38.651	34.9905
ARMC12	0.422944	0.220288	0.331977	0	0.0360768	0.0262925
ARMC2	2.42972	2.42524	2.49115	2.43708	3.04835	2.58501
ARMC2-AS1	0.132704	0.252768	0	0	0	0.245711
ARMC3	0	0	0	0	0	0
ARMC4	0.072112	0.0501827	0.139881	0.111561	0.216686	0.0911998
ARMC4P1	0.0416129	0.0552288	0.0609359	0.0418016	0.102807	0.0440586
ARMC5	6.40871	7.17465	5.87756	7.27307	6.51767	7.1538
ARMC6	23.5983	24.2344	23.3511	33.5684	29.8952	31.1394
ARMC7	6.22038	6.73348	6.01884	9.01143	8.24318	9.52416
ARMC8	5.1424	5.34165	4.92913	8.31004	9.92961	8.69423
ARMC9	0.48479	0.515008	0.451908	203.228	207.651	198.653
ARMCX1	0.0589949	0.0404533	0.0429385	0	0	0
ARMCX2	0.0172672	0	0.0104731	0	0	0
ARMCX3	27.1704	24.8273	24.47	30.1778	34.4225	31.8829
ARMCX4	0.0125766	0.00958903	0	0.0148144	0.00874017	0.0182132
ARMCX5	0.343493	0.234685	0.296449	0	0	0
ARMCX5-GPRASP2	0.227848	0.205581	0.194878	0.237438	0.165609	0.108354
ARMCX6	53.3859	48.2942	54.1904	65.3612	65.0789	70.3242
ARMH1	1.94131	1.76442	1.83573	1.26937	1.41862	1.30108
ARMH2	0	0	0	0.0363711	0.104159	0
ARMH3	3.40783	2.9796	3.42444	6.60492	7.16916	7.52949
ARMH4	4.49163	5.06405	4.39264	0.0209429	0.014994	0.023843
ARMS2	0.0361414	0	0	0	0.0524082	0
ARMT1	5.99082	6.5184	4.99635	13.3196	14.3342	13.277
ARNT	10.095	9.65861	10.0799	24.7414	26.8042	26.1053
ARNT2	0	0	0.0217936	0.0836929	0.0937873	0.101946
ARNTL	1.65231	1.75595	1.85028	9.50878	10.2053	9.82425
ARNTL2	0.323488	0.358163	0.328484	5.7548	6.13006	5.76761
ARNTL2-AS1	0	0	0	0.11949	0.0560882	0.0857758
ARPC1A	48.2731	49.4496	47.8614	52.944	57.6802	60.5437
ARPC1B	195.63	231.42	206.822	341.069	319.685	345.157
ARPC2	203.837	214.711	205.026	379.245	388.617	373.363
ARPC3	323.384	315.144	322.052	520.837	624.535	555.388
ARPC4	59.9546	59.8369	59.403	85.7432	82.9028	84.4975
ARPC4-TTLL3	1.06786	0.813193	1.15137	4.03807	4.67101	2.94429
ARPC5	164.49	166.097	164.368	206.292	223.684	207.969
ARPC5L	47.478	46.9498	41.7767	46.6483	49.313	45.3119
ARPIN	0.166826	0.205366	0.206463	0.321057	0.370773	0.282854
ARPP19	69.266	73.2318	64.4694	76.0314	76.2228	73.7548
ARPP21	0	0	0	0	0	0
ARR3	0	0	0.0491087	0.0204989	0	0.0441769
ARRB1	0.0975819	0.128981	0.11463	0.00319301	0.0456698	0.0170972
ARRB2	30.6001	29.3115	31.1498	74.091	77.3469	80.2988
ARRDC1	18.3709	21.2627	17.9919	18.5323	16.598	16.2214
ARRDC1-AS1	22.1594	26.3433	24.2813	19.9231	19.4961	17.8315
ARRDC2	15.6809	15.4956	14.6829	24.0953	22.9106	22.5907
ARRDC3	32.0185	31.6945	28.0096	75.9368	84.8312	74.6604
ARRDC3-AS1	1.2952	0.995283	1.22937	1.22603	1.70625	1.39575
ARRDC4	0.378444	0.277073	0.258229	0.00598832	0	0
ARRDC5	0.0318466	0	0	0	0	0
ARSA	17.2348	20.6167	17.2481	7.97962	8.16407	7.34679
ARSB	2.71884	2.86746	2.89924	5.40614	5.75154	5.78974
ARSD	0.336066	0.350612	0.364872	0.202687	0.187837	0.256788
ARSD-AS1	0	0	0	0	0	0
ARSE	0.0127938	0.0292426	0.0352455	0	0	0
ARSF	0.0350555	0.0666841	0.014148	0.0947383	0.101354	0.127143
ARSG	7.5404	6.84253	7.09646	8.58892	9.6469	8.93709
ARSH	0	0	0	0	0	0
ARSI	0.0153166	0	0	0	0	0
ARSJ	0.0146997	0.0447999	0.0356753	0.02491	0.0213337	0.0267669
ARSK	2.85131	3.451	2.89627	3.98634	4.12608	3.68197
ART1	0	0	0	0	0	0
ART3	0.100793	0.0959926	0.0815118	0.0510369	0	0.0549944
ART4	0.0370068	0.0527683	0.0280655	0.0568533	0.0550082	0.0655375
ART5	0	0	0	0	0	0
ARTN	0.184766	0.129879	0.159928	0.267028	0.205994	0.283815
ARV1	19.8773	19.2303	22.506	33.4574	41.5837	35.4266
ARVCF	0.409915	0.69931	0.374739	1.16114	0.990687	1.0567
ARX	0.0511846	0.0933882	0.0827864	0	0	0
AS3MT	0.120812	0	0	0	0	0
ASAH1	20.7377	22.663	22.2024	103.695	114.691	107.209
ASAH2	0.0254345	0	0.0318681	0.0110065	0	0
ASAH2B	2.12012	2.02629	2.0151	0.841767	1.24205	1.06814
ASAP1	1.9836	1.98623	1.87138	7.53198	8.1093	8.14267
ASAP1-IT1	0	0	0	0	0	0
ASAP1-IT2	0.122846	0.0671415	0.0370121	0.291851	0.212976	0.185997
ASAP2	0.863786	0.94253	0.867516	2.67524	2.95991	2.77875
ASAP3	0.00576733	0.0395471	0.0139922	0.00584061	0	0.0062935
ASB1	2.17459	2.07819	1.98985	4.82049	4.4835	4.93445
ASB10	0	0	0	0	0	0
ASB11	0.0203491	0.0216154	0.0230557	0.0850938	0.0435519	0.0808874
ASB12	0	0.0239367	0.0254072	0	0	0
ASB13	28.7967	30.56	29.0494	43.3378	40.1387	39.7441
ASB14	0.170021	0.324647	0.422575	0.172709	0.402289	0.299099
ASB15	0	0	0	0	0	0
ASB16	0.631875	0.44519	0.511378	0.847494	0.749616	0.816565
ASB16-AS1	13.2229	13.1347	13.308	18.4694	17.9451	20.2786
ASB17	0	0	0	0	0	0
ASB18	0.0942218	0.0606301	0.105539	0.109563	0.165218	0.11778
ASB2	4.54067	5.20046	4.46767	9.53782	10.0707	9.50181
ASB3	6.85461	6.13622	6.82333	8.43365	8.34328	8.55943
ASB4	0.025284	0.0506133	0.0460064	0.0519764	0.0367863	0.0552882
ASB5	0	0	0	0	0	0
ASB6	7.56456	7.90652	7.36544	11.0298	10.1441	11.1363
ASB7	5.51397	5.49925	5.2025	7.67071	8.71344	7.88291
ASB8	11.9653	12.1891	12.266	19.092	19.0119	18.129
ASB9	1.94824	2.08326	2.51397	4.75945	4.40901	4.90216
ASB9P1	0	0	0.019492	0.0163843	0	0
ASCC1	15.3005	15.3095	16.0078	24.7296	27.3161	26.3205
ASCC2	21.6127	22.775	21.4025	27.4265	27.5037	29.1452
ASCC3	3.89724	4.03017	3.95352	6.36219	7.5993	6.475
ASCL1	0	0	0	0	0	0
ASCL2	0	0	0	0	0	0
ASCL3	0	0	0	0	0	0
ASCL4	0	0	0	0	0	0
ASCL5	0	0	0	0.0380094	0	0
ASDURF	1.2052	0.720778	0.864479	1.51675	3.90753	2.97324
ASF1A	8.66896	8.90531	9.30899	13.1786	14.4564	12.8568
ASF1B	21.2992	21.2778	21.2374	31.1997	30.8642	28.9802
ASGR1	0	0	0.0231052	0.0192891	0	0
ASGR2	0	0	0	0.370166	0.252355	0.349011
ASH1L	4.38738	4.50338	4.05088	7.67836	8.32069	7.8585
ASH1L-AS1	6.29505	5.98843	6.53476	8.46102	7.30073	7.75565
ASH2L	7.85106	7.47269	8.69651	17.737	20.2646	18.3215
ASIC1	0.798297	0.684249	0.809505	0	0.00904376	0.0143702
ASIC2	0	0	0.0109088	0	0	0.00981324
ASIC3	0.437496	0.390045	0.569648	2.01588	1.718	2.13247
ASIC4	0.0344825	0.0197041	0.0209146	0	0.0125007	0.0188142
ASIC5	0.0153474	0	0	0.0310847	0.022255	0
ASIP	0.535643	0.408106	0.0721962	0.241088	0.51782	0.584512
ASL	18.002	19.3314	16.9403	48.2942	45.7188	44.4847
ASMT	0.202674	0.277686	0.426208	0.797363	0.774297	0.673353
ASMTL	32.6312	36.7369	31.5299	11.941	10.2156	10.0693
ASMTL-AS1	11.0915	8.30334	8.57703	1.99014	2.76995	2.27412
ASNA1	60.0649	60.3244	61.7242	122.025	108.801	117.959
ASNS	245.102	240.176	244.315	229.104	250.583	231.055
ASNSD1	17.6944	18.2053	18.0994	13.9292	15.5679	13.9869
ASNSP1	2.81047	3.02654	3.78925	1.60023	1.7654	2.66207
ASPA	0	0	0	0	0	0
ASPDH	0.212656	0.182275	0.270598	0.313939	0.371431	0.496734
ASPG	0	0	0.0156771	0	0	0
ASPH	0.950159	1.21621	1.00632	0.0140041	0.0200524	0.007545
ASPHD1	0.252168	0.268977	0.203929	8.46131	7.24017	7.50307
ASPHD2	4.7036	5.36518	5.22236	3.60431	3.9223	3.47424
ASPM	7.31042	7.45542	6.9633	2.93568	3.44901	3.12757
ASPN	0.0435521	0.024934	0.0264128	0.0330624	0.0315654	0.0355777
ASPRV1	0.693163	0.623358	0.565612	0.736527	0.609612	0.756828
ASPSCR1	12.6389	15.9969	12.5435	14.2355	13.4111	13.0375
AS-PTPRE	0	0	0	0.0517963	0.0741669	0
ASRGL1	0.736052	0.853387	0.67289	0.0540148	0.0309374	0.0698439
ASS1	1183.68	1183.23	1160.18	418.541	388.123	397.428
ASTE1	2.71397	2.62731	2.57225	3.29601	3.81986	3.7159
ASTL	0.0417751	0.0954851	0.202702	0.0634588	0.181733	0.136759
ASTN1	0.0242793	0.0346844	0.0272086	0.172115	0.105621	0.185462
ASTN2	2.17661	2.34551	2.07999	4.24342	4.35361	3.84035
ASTN2-AS1	0	0	0	0	0	0
ASXL1	10.7119	10.4461	10.0099	19.9682	18.8521	19.7924
ASXL2	2.83736	3.2406	2.55294	6.07217	6.2737	5.9679
ASXL3	7.32017	7.52435	7.66405	2.32607	2.46761	2.42386
ASZ1	0	0	0	0	0	0
ATAD1	12.5673	12.5586	11.7583	21.1326	23.2026	21.4164
ATAD2	5.06302	5.23149	4.92272	10.5523	11.0282	10.1067
ATAD2B	0.720846	0.780807	0.640258	2.11437	2.43061	2.31941
ATAD3A	42.6384	51.6869	40.7485	85.4075	74.3198	76.5985
ATAD3B	17.6424	19.622	16.6604	37.8059	32.493	33.9555
ATAD3C	22.8206	24.6504	24.7337	13.1185	12.6986	12.2542
ATAD5	1.2363	1.1658	1.262	2.24924	2.33867	2.09221
ATAT1	6.15372	5.55819	5.77074	8.37417	7.69669	9.91309
ATCAY	0.226657	0.184143	0.266621	0.306695	0.474606	0.469112
ATE1	3.82405	4.17417	3.63476	7.81412	8.47739	8.34672
ATE1-AS1	0.477367	0.511461	0.462549	0.959883	1.35939	0.90463
ATF1	11.9437	11.3673	11.1375	20.6488	22.2616	22.1416
ATF2	15.1557	16.0863	12.7725	13.3554	14.3254	13.3271
ATF3	13.0491	13.4144	12.3812	35.7554	39.5196	37.4932
ATF4	842.592	817.893	875.11	647.177	674.116	695.203
ATF5	14.1911	13.3316	13.1073	73.3907	74.1366	77.2081
ATF6	15.3524	15.0064	15.3295	24.7751	27.9298	26.0378
ATF6B	81.3533	74.7189	81.297	79.3182	78.563	85.7207
ATF7	10.877	9.06918	10.4457	19.8373	21.9169	20.0276
ATF7IP	7.63126	8.0451	7.13548	4.86688	5.20637	5.62504
ATF7IP2	0.169014	0.158564	0.0968862	1.55811	1.98727	2.11255
ATG10	9.83111	8.89616	9.32031	8.77606	10.0027	9.24892
ATG101	39.825	41.2057	38.2955	63.5572	55.3373	56.0984
ATG12	15.0235	14.5963	14.727	23.1717	25.9965	24.4688
ATG13	23.7261	23.5959	24.4764	40.4249	39.7364	40.6607
ATG14	1.48768	1.28657	1.31522	4.24724	4.68103	4.8212
ATG16L1	2.63345	2.66712	2.67587	6.99241	7.54851	7.00092
ATG16L2	11.8671	9.53009	10.5626	13.365	13.0145	13.0176
ATG2A	7.21266	9.09905	7.07146	11.5254	9.88898	10.7478
ATG2B	3.21775	2.89413	2.79625	2.26245	2.63528	2.38728
ATG3	55.471	51.6043	56.4007	71.116	81.4958	75.0938
ATG4A	16.1093	15.7469	15.6457	26.7691	31.238	28.3677
ATG4B	14.8405	15.423	14.4893	30.2923	28.4992	29.4313
ATG4C	11.6086	11.7846	10.8683	14.8395	16.8468	14.3541
ATG4D	8.11843	8.8994	8.89121	23.0382	20.4654	21.8633
ATG5	8.4262	8.43646	8.13157	11.7536	12.6992	11.2972
ATG7	2.64771	2.49897	2.50648	6.2786	6.20896	5.9004
ATG9A	17.384	18.1604	16.5755	37.7443	33.6027	37.3331
ATG9B	2.05511	1.81456	1.88764	6.47432	7.26454	8.14929
ATIC	60.9781	57.4451	59.39	45.0013	50.147	46.195
ATL1	0.183519	0.311492	0.275623	0.741148	0.790465	0.676894
ATL2	11.6033	12.3918	11.4483	24.1688	26.2852	22.9488
ATL3	9.6877	10.2743	8.85301	22.3776	24.5361	21.2674
ATM	17.7602	20.3871	18.9011	13.0592	15.0938	12.9628
ATMIN	8.29615	8.1341	7.76489	12.7513	15.1359	14.0986
ATN1	8.66362	9.57478	8.72563	18.0117	16.9447	19.7147
ATOH1	0.0264592	0	0	0	0	0
ATOH7	0	0	0	0	0	0
ATOH8	0.0201918	0.00923045	0.019595	0.163587	0.222527	0.273221
ATOX1	164.687	162.814	169.655	354.435	316.821	348.302
ATP10A	2.60713	2.64676	2.51131	0	0	0
ATP10B	0.00620713	0	0.0037648	0.022001	0.040504	0.0304804
ATP10D	0.761262	0.762802	0.783404	1.02304	1.16668	0.976385
ATP11A	2.97695	3.28578	2.56579	4.45305	4.10756	4.3574
ATP11A-AS1	0.0338458	0.0543555	0.0410569	0.151686	0.134759	0.0372858
ATP11AUN	0	0	0	0.0113637	0	0
ATP11B	14.4797	15.068	13.2717	16.618	18.6308	17.2594
ATP11C	5.48376	5.9413	5.02905	8.19278	9.22541	8.46313
ATP12A	0	0	0.00786735	0	0	0
ATP13A1	53.7116	53.9499	50.1947	32.1645	29.5509	32.4755
ATP13A2	16.5174	19.5007	16.5252	27.8503	25.4329	27.5369
ATP13A3	14.1564	15.1107	12.1782	25.3234	25.9941	23.3581
ATP13A4	0.0723966	0.0679511	0.0680389	0.114286	0.113912	0.0949282
ATP13A4-AS1	0.0182569	0	0	0.0624489	0	0.0409591
ATP13A5	0.00595933	0.00681061	0	0	0	0
ATP13A5-AS1	0	0	0	0	0	0
ATP1A1	132.357	130.322	125.377	218.822	221.288	221.887
ATP1A1-AS1	3.03519	2.4225	2.79987	3.77327	4.5856	4.16819
ATP1A2	0.107812	0.129485	0.0913742	0.0662555	0.0189029	0.0363783
ATP1A3	1.09542	1.00627	0.874655	2.84355	2.56364	3.17753
ATP1A4	0	0	0	0.0062496	0	0
ATP1B1	1.12885	1.05591	1.03988	0.092379	0.165061	0.0994707
ATP1B2	0.159973	0.13482	0.24163	0.0519781	0.0906958	0.181257
ATP1B3	87.2958	89.5718	87.9373	166.916	170.654	159.405
ATP1B4	0.0912828	0.0420435	0.0373793	0.12534	0.0897157	0.0570677
ATP23	8.9116	8.01721	8.92483	8.25585	8.32035	8.99068
ATP2A1	1.18362	1.06655	1.07685	2.98896	2.7289	3.16334
ATP2A1-AS1	8.0261	7.03578	7.7988	2.61533	1.96907	2.1544
ATP2A2	36.3468	37.939	35.3125	73.3593	77.7525	78.3399
ATP2A3	9.28895	10.4568	9.64688	11.8241	10.5212	11.3446
ATP2B1	4.35904	4.87455	4.08073	6.27869	6.60052	6.02646
ATP2B1-AS1	0.0654909	0.0748461	0.019861	0.0414519	0.118709	0.0446662
ATP2B2	0.0211548	0.0241767	0.0186798	0.00803389	0.00383453	0.0173136
ATP2B2-IT2	0	0	0	0	0	0
ATP2B3	0	0	0	0.0111902	0	0.00803862
ATP2B4	4.27321	4.64144	4.27949	6.2435	5.94306	6.15141
ATP2C1	27.459	28.787	27.1444	37.9904	40.4649	36.4682
ATP2C2	0.222963	0.0676486	0.139576	0.0537887	0.0238356	0.0717479
ATP2C2-AS1	0.0316904	0.0448865	0	0.0624879	0.0474838	0.0625326
ATP4A	0.0541854	0.0387035	0.0246487	0	0	0.00739111
ATP4B	0	0	0	0.106281	0.152184	0.0381742
ATP5F1A	519.915	518.24	512.331	953.74	958.446	917.627
ATP5F1B	630.47	651.179	636.9	1289.68	1206.16	1202.34
ATP5F1C	245.834	240.565	255.637	433.86	491.707	437.488
ATP5F1D	190.533	259.529	179.425	184.962	163.654	157.251
ATP5F1E	947.677	876.881	915.133	1015.73	984.449	1063.27
ATP5IF1	240.079	262.13	264.955	416.615	430.97	442.945
ATP5MC1	243.954	229.197	255.079	697.533	639.069	715.929
ATP5MC2	1004.68	889.547	977.903	1279.89	1188.3	1329.78
ATP5MC3	85.7338	88.9844	83.6901	112.778	106.643	110.109
ATP5MD	288.933	267.955	336.719	434.899	534.264	538.476
ATP5ME	473.812	407.852	494.569	576.204	571.921	598.662
ATP5MF	618.595	540.5	644.354	711.44	839.632	818.279
ATP5MF-PTCD1	0.00310157	0.00437281	1.05032	2.56209	2.31619	1.03025
ATP5MG	356.944	326.831	367.379	333.362	358.105	373.629
ATP5MGL	0.81142	0.605581	0.172905	0.650985	0.316733	0.382303
ATP5MPL	155.136	151.817	154.107	154.71	193.543	177.561
ATP5PB	82.4263	82.469	86.3865	135.127	148.361	140.332
ATP5PD	363.773	366.46	361.162	348.142	336.54	351.996
ATP5PF	261.703	254.736	272.455	372.902	453.932	435.81
ATP5PO	436.252	432.38	436.155	646.343	673.004	604.402
ATP5S	3.5425	3.54538	3.15254	7.6866	7.53584	7.36048
ATP6AP1	173.232	169.078	167.007	172.858	160.733	168.913
ATP6AP1L	1.67058	1.57928	1.61725	3.59344	4.16172	3.68384
ATP6AP2	134.936	138.442	120.312	126.941	124.911	116.171
ATP6V0A1	33.5708	31.976	33.2605	43.4004	41.7516	44.644
ATP6V0A2	2.40065	2.46347	2.33471	4.49455	4.72237	4.51561
ATP6V0A4	0.192957	0.16539	0.204809	0.0814202	0.128244	0.140374
ATP6V0B	376.938	426.97	373.617	617.932	517.591	508.978
ATP6V0C	115.906	141.16	124.708	178.242	156.109	189.143
ATP6V0CP3	0	0	0	0.0552494	0	0
ATP6V0D1	56.43	54.3081	56.1697	131.031	121.214	126.515
ATP6V0D2	0.142012	0.120925	0.198907	0.233784	0.390219	0.230535
ATP6V0E1	171.77	158.1	173.212	237.356	253.193	255.654
ATP6V0E2	0.822887	1.01049	0.872359	1.12883	1.09496	1.11827
ATP6V0E2-AS1	0.0635387	0.0453844	0.0674415	0.0241297	0.0230342	0.0346678
ATP6V1A	25.5022	26.3212	23.0121	32.3129	35.2489	32.4484
ATP6V1B1	0.0130413	0.0149043	0.0316398	0	0	0
ATP6V1B1-AS1	0.0999836	0.202873	0.0915833	0.916215	1.28603	1.16358
ATP6V1B2	10.3212	10.2638	10.6606	28.4309	27.7918	28.2884
ATP6V1C1	7.34651	6.99643	7.48439	22.057	26.126	23.0864
ATP6V1C2	1.84534	1.91616	1.60155	0.932878	0.845521	0.936844
ATP6V1D	13.7708	13.2708	14.3599	39.4652	45.073	39.4924
ATP6V1E1	27.3515	28.081	28.168	72.1924	69.1078	70.1703
ATP6V1E2	6.97371	6.25273	6.59723	8.86511	9.11782	9.23174
ATP6V1F	236.694	230.386	251.578	239.657	223.079	243.134
ATP6V1G1	61.9739	65.7452	61.0242	74.8567	78.5253	76.4113
ATP6V1G2	7.15308	7.29284	7.82472	0.903372	1.04985	0.816809
ATP6V1G2-DDX39B	5.15374	4.93934	5.31515	1.82135	3.16162	2.30127
ATP6V1G3	0	0	0	0	0	0
ATP6V1H	9.19713	9.64661	9.14696	22.0491	23.537	22.9616
ATP7A	3.9905	4.67814	4.50691	5.39152	5.68294	5.3193
ATP7B	0.0886407	0.101406	0.0625422	1.08384	1.08788	1.11752
ATP8A1	2.70076	2.75702	2.33765	4.7108	4.95253	4.43028
ATP8A2	1.73266	1.70462	1.5514	0.00506875	0.0145158	0.0109259
ATP8B1	0.353306	0.414357	0.332515	0.37751	0.378072	0.362033
ATP8B2	20.9585	21.771	19.4379	11.3514	10.5257	11.3533
ATP8B3	0.181386	0.180236	0.186813	2.71479	2.63507	3.01673
ATP8B4	0.00428292	0	0	0.00433734	0	0.014021
ATP8B5P	0	0.0385787	0.0131345	0.0451269	0.0461906	0.0348853
ATP9A	0.0735161	0.0940986	0.0514088	0.453082	0.473965	0.503308
ATP9B	2.97963	3.19052	2.86539	3.83688	3.87265	3.91783
ATPAF1	32.2951	32.3824	33.9013	36.2574	40.8323	38.2532
ATPAF2	19.6959	18.8514	20.0917	15.9501	15.9135	17.3717
ATR	4.13961	4.02797	3.63889	5.79548	6.95681	5.64682
ATRAID	350.346	345.642	379.433	267.701	277.721	263.383
ATRIP	7.10681	6.25089	6.37564	8.05216	5.69345	7.47762
ATRIP-TREX1	0.673881	1.04393	0.91206	1.11987	1.80966	1.16188
ATRN	17.9101	17.6108	18.3878	20.6122	22.5869	21.1366
ATRNL1	2.73044	2.26074	2.3227	0.837141	0.621337	0.513916
ATRX	3.89724	4.35742	3.64902	5.27128	6.04984	5.08518
ATXN1	2.9618	3.04863	2.50027	8.90728	10.3063	9.28694
ATXN10	35.9205	35.1644	35.2699	26.7704	29.7001	26.9458
ATXN1L	8.67719	8.66988	7.94778	12.7631	13.2051	13.7918
ATXN2	7.44935	6.73955	7.48566	16.9291	18.6089	20.1865
ATXN2-AS	0.0803987	0.183767	0.585169	0.244261	0.116585	0.789604
ATXN2L	60.6475	61.798	56.2048	112.461	104.552	120.318
ATXN3	1.85197	1.86113	1.90211	4.06914	4.46682	4.08479
ATXN3L	0	0	0	0	0	0
ATXN7	3.33831	3.39484	3.07342	6.37645	6.89047	7.0742
ATXN7L1	0.144621	0.126	0.100173	0.10544	0.112913	0.147368
ATXN7L2	2.59967	2.73118	2.57628	5.10079	4.48705	4.93649
ATXN7L3	24.629	24.0729	23.4391	39.049	34.4429	37.9517
ATXN7L3B	28.6911	29.6265	27.8352	36.7187	37.6102	37.6383
ATXN8OS	0.0180445	0.0205745	0	0.0182293	0	0
AUH	7.29845	8.50318	7.52793	7.80647	8.37739	7.46481
AUNIP	3.49757	3.37063	3.32845	5.67576	6.2285	6.52786
AUP1	178.84	175.15	185.964	241.763	232.074	233.665
AURKA	12.0425	11.2636	12.5102	38.0012	44.1387	41.7397
AURKAIP1	140.588	164.847	135.166	206.363	168.837	177.424
AURKAPS1	2.34739	2.08161	1.97337	5.35301	5.84297	4.90455
AURKB	32.1968	30.8818	31.9255	28.2345	26.374	27.1853
AURKC	0.597095	0.227463	0.543233	0.226756	0.577226	0.352934
AUTS2	0.571944	0.526692	0.48448	0.0285246	0.0104932	0.0157929
AVEN	13.2872	12.7835	11.9447	9.54279	9.31431	8.72925
AVIL	0.645457	0.774132	0.74408	0.511131	0.461799	0.567036
AVL9	7.13546	7.66803	6.78039	22.9502	23.5984	22.3759
AVP	0	0	0	0	0	0
AVPI1	1.83609	1.94849	1.81819	2.10607	1.90178	1.73782
AVPR1A	0.498766	0.569861	0.388297	0.246753	0.331646	0.305123
AVPR1B	0.0051044	0.00583355	0	0.020677	0.0222055	0.0167103
AVPR2	0.135015	0.0797405	0.0636053	0.273991	0.241781	0.327099
AWAT1	0	0	0	0	0	0
AWAT2	0	0	0	0	0	0
AXDND1	0.0359148	0	0.0348533	0.065468	0.0416637	0.0313531
AXIN1	19.0086	22.3299	20.205	31.6692	31.1431	31.7753
AXIN2	0.187073	0.103659	0.130657	0.0918546	0.0904242	0.0866051
AXL	0.156538	0.0960942	0.119687	0.0885584	0.159952	0.207822
AZGP1	1006.18	1012.72	1035.65	26.065	28.3303	27.4837
AZGP1P1	2.00683	2.10679	2.06627	0.141781	0.10175	0.10185
AZI2	5.57792	5.73022	5.65294	16.541	17.2919	15.2506
AZIN1	26.3643	26.7565	24.4499	40.3259	45.875	38.6516
AZIN1-AS1	3.17447	2.56922	3.06299	2.31807	2.51524	2.22684
AZIN2	0.122679	0.0934686	0.101075	0.0690207	0.110472	0.0606161
AZU1	0	0.0355316	0.0377144	0.0629709	0.180335	0
B2M	6728.64	6700.93	6606.24	3715.12	4234.01	3906.55
B3GALNT1	0.151658	0.133361	0.0919892	0.0216304	0.0105875	0.0239158
B3GALNT2	13.7066	14.4057	12.6875	13.7279	15.2689	13.7161
B3GALT1	0.0126361	0.0284057	0.0158664	0.0519884	0.039547	0
B3GALT2	0	0	0	0.00692886	0.0099214	0
B3GALT4	0.502425	0.643795	0.498657	0	0	0
B3GALT5	0	0.0109157	0	0.00967268	0	0
B3GALT5-AS1	0.0541267	0.185576	0.0894971	0.0365429	0.0784884	0.14133
B3GALT6	5.39716	6.96565	5.43267	9.11552	9.12007	8.8488
B3GAT1	0.0618359	0.0785211	0.0583414	0	0	0
B3GAT2	0	0	0	0	0	0.0155996
B3GAT3	110.01	124.361	105.616	101.048	86.3612	89.4652
B3GLCT	0.279157	0.214859	0.172772	0.876958	0.883954	0.814406
B3GNT10	5.26502	5.66143	5.38111	4.20595	4.86919	3.72737
B3GNT2	4.15338	4.70402	3.9627	11.333	10.7327	9.47203
B3GNT3	0.0090891	0.0519373	0.0330768	0	0.02636	0.0198367
B3GNT4	0.434237	0.574418	0.439999	0.26298	0.229161	0.26083
B3GNT5	0.0233099	0.0199797	0.0282762	0.00590152	0.0169007	0.00635914
B3GNT6	0.0545163	0.033609	0.0239728	0.0233848	0.0964719	0.0126606
B3GNT7	0.0865419	0.0684721	0.0565278	0.337082	0.473013	0.334163
B3GNT8	0.0405551	0.0308989	0	0.0273802	0.117617	0.103262
B3GNT9	2.35726	2.53637	2.28829	2.82376	3.07982	2.74276
B3GNTL1	0.615772	0.665337	0.617912	1.42659	1.21822	1.24602
B4GALNT1	1.43499	1.37847	1.45149	15.2195	15.1065	15.6792
B4GALNT2	0	0	0	0	0	0
B4GALNT3	0.00707429	0	0	0	0	0
B4GALNT4	0.533528	0.657879	0.408758	0.0568744	0.0101798	0.0229817
B4GALT1	25.4057	26.9593	25.5875	25.4647	26.4469	26.6097
B4GALT1-AS1	0.188125	0.178627	0.182565	0.153095	0.218238	0.0823688
B4GALT2	65.4506	67.4225	63.7185	115.312	101.461	110.808
B4GALT3	54.4722	53.1377	53.3635	75.344	75.4365	79.1683
B4GALT4	5.48665	5.23433	5.01781	9.2715	10.3747	9.26512
B4GALT4-AS1	0	0	0	0	0	0
B4GALT5	8.62026	8.14289	8.08891	34.7936	37.0094	35.9187
B4GALT6	0.0040143	0.0113486	0.00486957	0	0	0
B4GALT7	10.3319	11.757	10.5759	16.6541	14.3167	16.1202
B4GAT1	11.225	12.187	11.1745	12.9863	13.5703	12.2225
B9D1	21.6879	22.9632	21.7454	10.5469	8.78926	8.67618
B9D2	3.10008	4.26136	2.93231	6.57566	6.91657	6.50107
BAALC	0.00861415	0.0210083	0.0111494	0.00930797	0.0666401	0.0188001
BAALC-AS1	0	0.0496903	0.105486	0.0880636	0.189147	0.0474462
BAALC-AS2	0	0	0	0.0284111	0	0
BAAT	0.0559039	0.01648	0.0423842	0.0424607	0.050666	0.0533787
BABAM1	58.2855	56.802	59.8876	120.578	112.457	119.44
BABAM2	22.5689	19.9543	22.9238	47.6919	52.2708	50.6644
BACE1	0.927271	0.853023	0.954252	1.04213	1.38382	1.09464
BACE1-AS	1.39276	1.90571	1.18864	2.33319	1.70498	1.6521
BACE2	5.69056	5.82716	5.603	4.29976	4.39097	4.33918
BACH1	10.0789	11.0544	8.95703	17.074	16.2779	15.0262
BACH1-IT2	0.0379994	0.0434275	0	0	0	0.0414662
BACH1-IT3	0	0	0	0	0	0
BACH2	1.21806	1.55745	1.31943	1.02211	1.10696	1.11963
BAD	36.9504	44.2879	35.6362	44.0212	39.2642	41.6841
BAG1	26.8205	29.4555	26.866	23.5807	21.9427	20.9634
BAG2	6.62031	6.94952	6.36516	28.6552	32.089	29.2718
BAG3	6.62013	6.93531	7.0383	34.523	34.9095	37.4699
BAG4	1.98317	2.32925	1.95893	4.35098	4.60059	4.27303
BAG5	6.66923	6.52795	6.45177	9.33881	11.3142	10.2387
BAG6	82.7838	84.8486	80.9688	145.316	139.23	147.641
BAGE	7.25892	5.90736	5.40941	13.7657	12.8953	12.0709
BAGE2	2.17223	2.02547	2.18199	2.10142	3.24126	2.43414
BAGE3	0	0	0	0	0	0
BAGE4	0.0629571	0	0	0.208307	0	0.13635
BAGE5	0.76187	0.426405	0.29203	1.24592	0.703035	0.841521
BAHCC1	0.0245782	0.040857	0.0379461	0.0746716	0.0745213	0.0536412
BAHD1	7.15628	6.65915	6.76637	16.4135	16.8122	16.245
BAIAP2	5.07402	5.50998	4.71364	5.90372	5.46043	5.43317
BAIAP2-DT	1.68147	1.90089	1.70136	2.18338	1.76298	1.87322
BAIAP2L1	4.64558	4.38834	4.45214	9.06002	9.26206	9.55077
BAIAP2L2	0.222804	0.214426	0.142249	0.0593776	0.0510135	0.0511855
BAIAP3	2.28615	2.33243	2.22862	0.751023	0.611008	0.745039
BAK1	30.4029	29.6104	29.9593	59.8762	59.9043	61.3125
BAMBI	2.43635	2.16942	2.44775	6.46343	7.67272	7.11141
BANCR	0	0	0	0	0	0
BANF1	402.47	403.776	400.804	328.855	301.244	330.19
BANF2	0	0	0	0	0	0
BANK1	0.0401009	0.054995	0.0291868	0	0.0219681	0
BANP	3.50187	3.93342	3.65013	8.9127	8.62137	8.23357
BAP1	32.5532	33.9431	31.5485	33.5077	29.9494	31.4222
BARD1	1.05621	1.3068	0.972909	1.13457	1.11029	1.25685
BARHL1	0	0.0306637	0	0.0135859	0.0194536	0
BARHL2	0	0	0	0	0	0
BARX1	8.44929	11.8133	9.0298	3.91212	3.93912	4.02299
BARX1-DT	0.036342	0.0415334	0.0440849	0	0	0
BARX2	19.4941	20.3081	19.3576	15.0061	14.1341	14.9578
BASP1	1.84449	2.29649	2.32842	0.136258	0.173962	0.229095
BASP1-AS1	0.272846	0.200669	0.264786	0.200634	0.254809	0.131534
BASP1P1	0	0	0	0	0	0
BATF	0.182337	0.382035	0.405505	5.44727	4.84741	6.00232
BATF2	0.300122	0.238604	0.329026	0.214969	0.189219	0.256307
BATF3	0.549002	0.594404	0.701022	0.907122	0.879902	0.819807
BAX	52.0147	50.7311	50.2021	116.538	95.9971	101.434
BAZ1A	5.70984	5.53026	5.5023	15.2654	18.4555	16.9752
BAZ1B	28.0416	27.6122	27.5754	31.8391	33.7027	34.1099
BAZ2A	21.7874	22.0924	21.2295	30.1381	30.656	32.4892
BAZ2B	1.31566	1.35858	1.22647	0.331227	0.364001	0.40837
BBC3	53.9261	67.3858	49.7204	77.8759	74.1591	73.8053
BBIP1	5.60689	5.4001	4.93117	7.2942	8.65867	7.40128
BBOF1	0.119726	0.180516	0.0421597	0.646141	0.769041	0.662135
BBOX1	0	0	0	0.0136338	0	0
BBOX1-AS1	5.20075	4.1029	3.73587	1.73681	1.37308	1.95622
BBS1	5.10321	4.99445	5.2131	4.78542	4.88113	4.85385
BBS10	3.52101	3.48229	3.36766	6.5692	7.08916	5.9407
BBS12	0.733595	0.598849	0.590235	1.46309	1.79105	1.32332
BBS2	9.00773	8.30166	8.48215	15.5379	17.3948	15.2606
BBS4	5.92799	6.49806	5.78648	20.4064	23.0081	19.8983
BBS5	3.57593	4.1174	3.01332	6.80448	6.20007	6.71045
BBS7	3.42837	3.57832	3.81628	6.80861	7.81578	7.1083
BBS9	1.43351	1.43577	1.21293	2.48764	2.72746	2.89024
BBX	6.39676	6.8019	6.29361	6.67227	6.69756	6.707
BCAM	0.232062	0.406166	0.232548	0	0	0
BCAN	0.0395035	0	0	0.0922231	0.15237	0.0764418
BCAP29	7.95237	8.45374	7.35589	12.1495	12.511	11.5659
BCAP31	453.239	432.231	430.164	364.135	332.094	334.842
BCAR1	1.82931	2.59496	1.83967	11.5576	9.81486	10.5971
BCAR3	0.201685	0.281716	0.285431	0.879544	0.779895	0.797586
BCAR4	0	0	0	0.0208114	0	0.143889
BCAS1	0.799833	0.869772	0.77637	0.0510443	0.0491853	0.0842742
BCAS2	22.4393	20.8363	22.3915	30.3061	33.6455	30.7431
BCAS3	8.082	8.0165	7.63211	6.50506	7.137	6.68423
BCAS4	0.971968	1.08718	1.22858	0.275347	0.136595	0.212168
BCAT1	2.2015	2.31685	1.73032	9.56878	10.0341	8.98936
BCAT2	38.5505	40.8752	38.2704	64.8652	54.3775	62.2213
BCCIP	38.394	35.2939	37.3299	30.8583	35.9864	32.1058
BCDIN3D	3.07064	3.46396	2.97566	2.51163	2.64168	2.30542
BCDIN3D-AS1	0.295488	0.20732	0.301293	0.503464	0.65349	0.529635
BCHE	107.288	113.979	103.147	106.228	117.297	102.852
BCKDHA	75.1658	74.5685	72.4999	113.291	93.8839	109.35
BCKDHB	18.3592	20.0562	19.3686	23.162	24.1555	23.1399
BCKDK	44.0461	45.9573	44.6707	57.18	50.5913	53.8127
BCL10	2.97972	3.12986	3.01772	5.21472	6.06036	5.62591
BCL11A	7.41762	7.19676	7.23815	3.77587	3.37016	3.77478
BCL11B	0.0300306	0.0240242	0.0182143	0.00304122	0	0
BCL2	33.0628	35.9221	30.6022	51.172	54.2308	52.0386
BCL2A1	0.321896	0.25681	0.135861	2.11523	2.80899	2.24195
BCL2L1	40.2084	42.6843	37.0218	43.7444	39.3092	42.6589
BCL2L10	0.043397	0	0.0263215	0.0439484	0.0943942	0.0710345
BCL2L11	38.3432	40.4182	37.8422	37.6395	39.7001	39.9742
BCL2L12	13.7493	13.4376	13.6657	29.0767	26.6466	30.5892
BCL2L13	6.05641	5.72423	6.13078	11.6388	13.1164	12.2585
BCL2L14	0	0	0.0329526	0	0	0.0148217
BCL2L15	0.10933	0.171619	0.101403	0.166004	0.240848	0.192854
BCL2L2	4.28268	3.62907	3.83222	8.89157	10.6866	10.5447
BCL2L2-PABPN1	0.22715	7.79089e-05	0.466755	2.28486	0.809229	1.51422
BCL3	3.90839	5.04862	3.93979	19.3025	17.262	19.1323
BCL6	2.09532	2.05599	2.0803	3.46423	3.29161	3.9667
BCL6B	0.0137002	0	0.00831014	0.0346864	0.0397352	0.0149507
BCL7A	0.418242	0.528049	0.687073	1.16688	1.02906	1.18136
BCL7B	40.5353	40.3454	43.3668	62.133	57.234	62.1627
BCL7C	20.7892	24.5318	20.3672	30.0111	25.57	26.3735
BCL9	5.36041	5.06432	4.89309	4.08106	3.85326	4.41838
BCL9L	2.25156	2.4829	2.40691	2.18477	1.95192	2.45034
BCLAF1	14.6524	14.2899	13.7186	21.788	24.8977	23.1021
BCLAF3	1.18046	1.02795	1.11749	2.2073	2.46445	2.17399
BCO1	0	0	0	0	0	0
BCO2	0.347186	0.299045	0.346146	0.120328	0.1144	0.109711
BCOR	12.9571	14.2657	12.6914	28.9633	31.1026	31.5744
BCORL1	1.26586	1.30411	1.13903	1.66815	1.55678	1.794
BCORP1	0.014077	0.0168965	0.017042	0.0285398	0.0110689	0.00934726
BCR	6.22262	6.59204	6.11874	4.76507	3.93069	4.5753
BCRP2	0.92214	1.00452	0.990759	0.655061	0.796308	0.855418
BCRP3	1.81904	1.06145	1.76823	0.691569	0.0293845	0.56762
BCS1L	30.8791	28.9947	27.5298	45.4481	42.3078	44.9676
BCYRN1	0	0	1.67017	0	0	0
BDH1	8.71172	8.92363	8.44392	21.614	21.1757	20.771
BDH2	2.77107	3.06227	2.92478	7.58796	7.29605	7.60082
BDKRB1	0.204586	0.21043	0.223357	0.0621556	0.0296668	0.0223251
BDKRB2	0.063044	0.0720497	0.0347618	0.0290205	0.0166217	0
BDNF	0.0339623	0.00763021	0.0081931	0.0234979	0.0248297	0.0219505
BDNF-AS	1.3993	1.17157	1.76224	1.20845	1.38012	1.33044
BDP1	3.42506	3.46017	3.08448	6.0386	6.5612	6.03738
BEAN1	0.235014	0.286478	0.209514	0.814292	0.721871	0.549707
BEAN1-AS1	1.44096	1.65973	1.76169	3.08781	3.68639	3.49779
BECN1	31.1827	30.8624	30.5152	49.9776	50.988	50.2261
BECN2	0	0	0	0	0	0
BEGAIN	0.563033	0.796634	0.546981	0.214341	0.298056	0.185288
BEND2	0.0356757	0.0590684	0.0893978	0.0788975	0.081266	0.105145
BEND3	1.71617	1.88083	1.59089	2.34732	2.25374	2.53892
BEND3P3	0.47771	0.58293	0.404374	1.02195	0.759985	0.790677
BEND4	0.455579	0.484328	0.476292	0	0	0
BEND5	0.0316487	0.0872312	0.115175	0	0	0
BEND6	0.449856	0.472995	0.354784	0.733405	0.665238	0.554089
BEND7	0	0	0	0	0.0770476	0.0144951
BEST1	0.725656	0.743305	0.869513	0.322944	0.28123	0.281367
BEST2	0	0.0151807	0	0.0403561	0.0192619	0.0289903
BEST3	5.93893	5.69621	6.61381	0.451309	0.626881	0.570039
BEST4	0.289893	0.386521	0.322352	0.342506	0.315278	0.263618
BET1	41.7557	41.0165	37.5543	39.7381	38.9431	35.5235
BET1L	27.4002	26.4854	26.71	50.7906	45.4932	51.0836
BEX1	4.82088	4.76142	5.88781	0	0	0
BEX2	0.766484	0.914289	0.741692	0	0	0
BEX3	0	0.0667179	0	0	0	0.0318524
BEX4	0.253891	0.459417	0.49795	0	0	0
BEX5	11.7607	13.073	11.0141	0	0.103672	0
BFAR	23.4749	22.9448	23.2912	26.8439	27.5459	26.986
BFSP1	0.1743	0.139721	0.203478	0.37144	0.477701	0.477062
BFSP2	1.51007	1.57571	1.59287	0.349069	0.476028	0.28658
BFSP2-AS1	3.02032	2.60799	3.75823	4.3796	4.60944	3.61066
BGLAP	0.265129	0.890437	0.358917	0.296098	0	0.391345
BGLT3	0	0	0	0	0	0
BGN	0.0314941	0.0116336	0.0249022	0	0.0166177	0.0116638
BHLHA15	21.0607	32.3332	23.7934	18.3533	17.3015	17.3599
BHLHA9	0	0	0	0	0	0
BHLHB9	0	0	0	0	0	0
BHLHE22	0.320819	0.28517	0.302689	3.63118	3.19387	3.21304
BHLHE23	0	0	0	0	0	0
BHLHE40	38.0213	38.0084	38.4786	273.219	280.442	293.89
BHLHE40-AS1	0.157655	0.18691	0.126998	0.485554	0.547684	0.561941
BHLHE41	3.38895	3.4144	3.23779	43.8226	47.7848	46.3657
BHMG1	0.0179363	0.0409969	0.0108789	0.0817389	0.0520184	0.0978635
BHMT	0.0593617	0.0565345	0.0840107	0.030058	0.0573865	0.08637
BHMT2	0.232601	0.264231	0.232801	0.354154	0.231465	0.313611
BICC1	0.0481208	0.0458481	0.0602215	0.0312394	0.0508294	0.0530203
BICD1	3.86387	3.82747	4.01403	4.04866	4.92927	4.60167
BICD2	6.76269	7.36384	6.50684	12.8075	12.0542	12.3145
BICDL1	0.650617	0.617179	0.628933	3.05159	3.12971	3.1387
BICDL2	0.739149	0.552327	0.534529	0.31669	0.309182	0.24818
BICRA	0.76489	0.878878	0.732253	1.74182	1.40893	1.63325
BICRAL	6.89078	7.28654	6.87629	5.67448	6.10577	6.3005
BID	8.88605	11.2809	9.17693	18.2202	17.547	17.3773
BIK	4.4214	6.62352	4.63863	4.90114	4.0288	3.91199
BIN1	2.84231	2.93017	2.86395	1.67357	1.74031	1.58025
BIN2	39.2402	35.7249	39.2899	0.294626	0.438762	0.342877
BIN3	8.62015	8.63975	8.48565	17.5709	16.3139	16.409
BIN3-IT1	0	0.0480628	0.0547141	0.0322882	0.0448143	0.016228
BIRC2	18.3872	19.4075	18.5284	20.8182	22.1087	19.4761
BIRC3	3.80726	3.56979	3.24708	35.8723	42.2255	35.5322
BIRC5	28.3214	30.9409	27.9978	28.5364	27.8315	28.5345
BIRC6	4.4088	4.70785	4.20184	6.97832	6.86203	6.86208
BIRC6-AS2	0.0569991	0.0651413	0	0	0	0
BIRC7	0.182015	0.198552	0.0981307	0	0	0.022069
BIRC8	0	0	0	0	0	0
BISPR	19.7697	18.3445	19.7612	10.6821	13.5106	11.428
BIVM	3.3078	3.06876	3.02508	5.08026	6.05703	5.10182
BIVM-ERCC5	1.05546	0.710522	1.37785	2.61694	3.16983	4.04252
BLACAT1	0.0189604	0.0108344	0	0.0288019	0	0.0103451
BLACE	0	0.0231365	0	0.0102224	0.043912	0
BLCAP	43.9948	46.2061	44.2	43.7095	43.1448	45.335
BLID	0	0	0	0	0	0
BLK	69.3804	68.9921	65.9832	1.19696	1.03366	1.17703
BLM	3.27277	3.29439	3.11391	5.8235	7.41549	6.2354
BLMH	35.2991	34.9679	31.9222	82.9986	84.0734	80.122
BLNK	56.0582	49.1957	57.6581	24.0888	26.5344	28.0028
BLOC1S1	115.072	118.449	119.303	152.986	118.856	127.889
BLOC1S1-RDH5	0.477347	0.706572	0.626493	0.943236	1.23607	0.937634
BLOC1S2	8.26355	7.83009	7.89929	13.5632	16.1444	13.8168
BLOC1S3	5.03973	4.93733	5.34094	9.15768	8.93466	10.5751
BLOC1S4	6.4414	6.88164	6.50007	10.8758	10.3598	9.24619
BLOC1S5	0.481291	0.294254	1.50443	2.27247	3.38991	2.06932
BLOC1S5-TXNDC5	0	0	0.239943	0.224469	0	0
BLOC1S6	19.7839	20.8237	18.3754	18.9876	20.6417	17.4291
BLVRA	104.364	102.921	95.5656	141.403	137.445	130.055
BLVRB	62.2232	67.077	56.9911	266.769	252.966	229.075
BLZF1	5.74905	6.21427	5.18047	13.2802	14.7433	13.5431
BMF	16.7483	16.0118	15.7145	17.3202	17.6165	17.4197
BMI1	1.30734	2.23821	1.53594	6.00899	5.24965	6.91121
BMP1	12.0088	12.3803	11.5466	8.95518	8.12759	9.43141
BMP10	0	0	0	0	0	0
BMP15	0	0	0	0	0	0
BMP2	0.45184	0.525136	0.315858	0.364513	0.677417	0.476349
BMP2K	2.12894	1.6778	2.35171	15.7319	16.5585	16.4925
BMP3	0.0531621	0.0279351	0.014829	0.0626078	0.0781879	0.0800275
BMP4	0.0155031	0.0177177	0.0188062	0.0157001	0	0
BMP5	0.00637198	0.00750766	0.00773427	0	0.00924977	0
BMP6	10.1178	9.69103	9.54472	1.06334	1.2718	1.28384
BMP7	8.15278	8.29036	7.94892	0.113418	0.12981	0.0961925
BMP7-AS1	0	0	0	0	0	0
BMP8A	1.38765	1.54985	1.43552	0.365402	0.455364	0.420409
BMP8B	3.12891	3.10098	3.00738	2.00184	2.0225	2.18843
BMPER	0	0	0	0	0	0
BMPR1A	0.0267059	0.00763018	0.0161979	0	0	0.00728558
BMPR1B	0.113031	0.13361	0.190361	0.207207	0.226034	0.195428
BMPR1B-DT	0	0	0	0	0	0
BMPR2	3.21447	3.30898	2.91719	3.98227	4.10657	3.80788
BMS1	8.10136	7.50744	7.75162	12.515	14.1035	13.1202
BMS1P1	1.49308	1.37567	1.36565	1.7432	2.01943	1.65696
BMS1P14	1.72141	1.72712	1.82619	0.680632	1.03465	0.797933
BMS1P17	10.9499	12.1404	13.5128	3.66556	9.05574	7.03382
BMS1P18	3.27338	1.24699	0	2.20998	0	0
BMS1P2	0.534621	0.544192	0.464834	0.683172	0.768319	0.594259
BMS1P20	2.29998	2.1824	2.869	0.143087	0.210366	0.261574
BMS1P21	0.19304	0.2218	0.224377	0.187571	0.11248	0
BMS1P22	8.89093	10.0911	7.07162	5.30661	5.91133	5.50427
BMS1P4	1.82148	1.6865	1.54392	2.48115	2.52247	2.51236
BMT2	2.54056	2.7576	2.21185	0.88018	1.06643	0.809152
BMX	0	0	0	0.00995485	0	0
BNC1	0	0	0	0	0	0
BNC2	0.833349	0.865035	0.768082	0.150197	0.161857	0.171637
BNC2-AS1	0.400238	1.25788	0.364134	0	0	0
BNIP1	10.5094	10.6986	10.5611	25.0538	25.0024	22.8014
BNIP2	20.7805	21.2749	18.6895	30.7926	33.6581	30.3903
BNIP3	56.7199	63.9266	55.9143	121.309	122.112	116.196
BNIP3L	43.387	45.0231	39.184	71.6287	78.4561	69.97
BNIPL	0.320939	0.262224	0.460402	0.616732	0.739869	0.62724
BOC	0.0118549	0	0	0	0	0.0148217
BOD1	13.4083	15.048	13.2286	24.2468	25.3587	23.8303
BOD1L1	3.10817	3.28126	2.85399	6.44789	6.66913	6.82942
BOD1L2	0	0	0	0	0	0
BOK	0	0	0.0112807	0.00941752	0.0269698	0.0101478
BOK-AS1	0.105755	0.0402874	0.0427624	0.0356996	0	0.0384679
BOLA1	4.08818	3.80557	3.7194	0.233717	0.239041	0.25184
BOLA2	410.367	477.307	433.961	414.237	310.256	336.696
BOLA2B	32.068	32.9363	29.9783	42.6548	49.2003	42.8164
BOLA2-SMG1P6	43.1186	42.6963	44.7426	58.1147	55.5097	53.6469
BOLA3	30.7977	28.1365	29.3771	65.7497	68.3528	75.7662
BOLA3-AS1	0.846808	1.10177	0.845951	0.756677	0.722321	0.897063
BOLL	0	0.0482756	0.0307172	0.0170749	0.0367102	0.0183889
BOP1	44.9428	50.8809	42.9034	53.9188	47.7076	48.9084
BORA	3.86664	3.80146	3.43165	6.17022	7.20513	6.9769
BORCS5	2.09719	2.5886	2.13676	2.33871	2.30959	2.24414
BORCS6	10.2867	12.1943	10.5216	5.53004	4.88911	4.73246
BORCS7	3.37473	3.3519	2.72302	3.65099	3.84471	3.5828
BORCS7-ASMT	0.0524119	0.19253	0.287244	0.680474	0.863885	0.78783
BORCS8	6.15611	5.92911	6.74643	10.0189	9.66873	10.3108
BORCS8-MEF2B	1.20432	0.861354	1.2275	3.06753	3.09126	3.73546
BPESC1	0.0207113	0	0.00837467	0.00699149	0.0200222	0
BPGM	5.98325	5.98649	5.59114	7.65279	8.88335	8.38677
BPHL	9.6353	9.92031	9.26571	16.1782	15.791	15.7215
BPI	0	0.0153859	0.0163311	0	0	0
BPIFA1	0	0	0	0	0	0
BPIFA2	0	0.0308807	0	0	0	0
BPIFA3	0	0	0	0	0	0
BPIFA4P	0	0	0	0	0	0
BPIFB1	0	0	0	0	0	0
BPIFB2	0	0	0	0	0	0
BPIFB3	0.0168855	0	0	0	0	0
BPIFB4	0	0.0132591	0	0	0.0168237	0
BPIFB6	0	0	0	0	0	0
BPIFC	0	0.0147034	0	0.0521162	0.074625	0.0561575
BPNT1	21.889	22.8709	20.9851	54.945	60.6642	56.8832
BPTF	4.27388	4.2786	4.22151	6.18884	6.90695	6.99423
BPY2	0	0	0	0	0	0
BPY2B	0	0	0	0	0	0
BPY2C	0	0	0	0	0	0
BRAF	4.34937	4.59745	4.04653	3.99017	4.3924	4.0724
BRAP	6.20701	6.57727	6.664	13.1859	14.1994	14.2732
BRAT1	10.0237	11.865	9.70193	21.3304	19.7636	20.2934
BRCA1	5.21331	5.51477	5.22013	9.57811	10.4379	10.1214
BRCA2	0.258087	0.206013	0.186405	0.675227	0.778427	0.690894
BRCC3	8.70491	7.98623	7.71499	11.6398	14.0355	12.7375
BRD1	5.21762	6.32255	5.12612	7.39764	7.1763	7.4932
BRD2	69.2418	64.0037	65.5099	94.1322	105.776	103.237
BRD3	5.4626	6.68782	4.59027	9.35142	9.04419	9.1356
BRD3OS	7.17955	8.29078	7.89055	7.62438	7.82392	6.86267
BRD4	10.5138	12.1436	10.7498	25.3455	23.3964	26.0179
BRD7	36.4127	35.0171	37.4551	44.8453	54.6832	50.0682
BRD7P3	0.0100747	0.0230289	0.0367013	0.0102069	0	0.0109932
BRD8	24.038	24.8765	24.0334	32.6842	33.7831	30.4559
BRD9	18.3508	18.2907	17.1285	30.4023	29.6208	29.8585
BRDT	0.0468878	0.0355908	0.0428653	0.0890073	0.0319116	0.0470731
BRDTP1	0.111231	0.12712	0.0449766	0.0375482	0.053765	0.0404598
BREA2	0.263053	0.327812	0.250641	0.222762	0.29178	0.255327
BRE-AS1	0.312175	0.160546	0.302949	0.649514	0.568281	0.701938
BRF1	3.73169	4.45609	3.3018	7.28043	7.25446	7.23746
BRF2	3.87808	4.01203	3.9049	9.49752	9.70339	8.6574
BRI3	86.1327	104.06	85.3915	127.322	104.256	110.674
BRI3BP	7.24048	8.55655	7.59615	9.73267	9.69673	10.045
BRICD5	1.5716	1.94629	1.64657	1.4279	1.27282	1.79927
BRINP1	0	0	0	0	0	0
BRINP2	0.190837	0.12033	0.0718437	0	0	0
BRINP3	0.00901047	0.0102976	0	0	0	0
BRIP1	0.755644	0.776038	0.644096	1.70161	1.79918	1.65544
BRIX1	26.608	25.8073	26.864	39.4103	48.6363	42.3304
BRK1	125.635	118.392	126.445	247.021	243.041	250.041
BRMS1	61.2155	61.9368	59.5443	100.987	95.5013	93.1404
BRMS1L	2.00077	2.10148	1.83763	4.9883	5.60918	5.0736
BROX	22.8703	24.7405	17.804	46.0396	47.107	43.1679
BRPF1	3.40511	3.68681	3.28053	11.6433	11.3732	11.8082
BRPF3	1.8824	1.93214	1.73752	3.72544	3.60359	3.80507
BRS3	0	0	0	0	0	0
BRSK1	0.818906	0.683916	0.678173	0.271121	0.445307	0.352292
BRSK2	0	0.0067249	0	0	0	0
BRWD1	7.45103	8.44248	7.12454	8.86789	9.33538	8.30317
BRWD1-AS1	0	0	0	0.0471641	0.0675341	0.0508214
BRWD1-AS2	0.223004	0.0637148	0.338145	0.338756	0.121266	0.152093
BRWD3	1.78659	1.90675	1.57912	3.56969	3.85736	3.51539
BSCL2	199.306	191.943	199.531	1.33421	1.44509	1.05862
BSDC1	27.2279	27.7435	26.6523	47.1714	46.5273	48.1836
BSG	700.363	745.95	696.993	531.345	497.415	532.324
BSN	0.0348828	0.0332214	0.0282099	0.088315	0.0758746	0.0666142
BSND	1.26341	1.55327	1.25393	6.82379	5.07978	5.36847
BSN-DT	0.154826	0.201089	0.217135	0.281989	0.246922	0.222503
BSPH1	0	0	0	0	0	0
BSPRY	5.97562	5.74194	6.04424	20.4899	18.6205	21.9441
BST1	0.017653	0.0806989	0	0.0178773	0	0.0192636
BST2	760.063	702.972	723.404	237.432	231.844	230.221
BSX	0	0	0	0	0	0
BTAF1	7.81838	6.50563	6.47143	10.1282	13.1598	12.1501
BTBD1	13.3988	13.8606	12.5433	26.0261	26.7716	24.3396
BTBD10	11.6475	11.0096	10.7632	60.2617	64.5668	60.691
BTBD11	0.112133	0.135886	0.205136	0	0	0
BTBD16	0	0.0156036	0	0	0.0197982	0
BTBD17	0	0	0	0	0	0
BTBD18	0.0240185	0.0182996	0.0291358	0.0162158	0.0232193	0.0524196
BTBD19	1.81907	2.67018	1.68028	2.38301	2.17801	2.69527
BTBD2	28.4345	35.9282	29.6848	36.0963	33.9976	33.9901
BTBD3	4.33332	4.36091	3.64536	3.32167	3.08308	3.10865
BTBD6	5.03513	5.27514	3.92848	0.476457	0.442532	0.402397
BTBD7	2.71184	2.67026	2.07627	5.61089	6.1184	5.76946
BTBD8	0.0542977	0.124108	0	0.0366584	0	0.0197505
BTBD9	1.83702	1.62761	1.68815	1.11252	1.13251	1.2575
BTBD9-AS1	0	0	0	0	0	0
BTC	0	0	0	0.0374119	0.026785	0.0100782
BTD	16.282	15.1241	16.3992	11.5967	9.78252	10.8386
BTF3	1467.46	1377.07	1522.08	1345.32	1590.1	1461.79
BTF3L4	24.8589	25.1283	24.0291	38.1452	39.1595	35.4582
BTF3P11	0.051962	0.118787	0	0.263113	0	0.113406
BTG1	15.4165	17.0025	14.5672	43.7362	44.4153	41.5383
BTG2	217.42	205.191	219.937	117.636	132.933	132.981
BTG3	7.67354	8.43438	6.79638	23.2609	22.5679	19.2308
BTG3-AS1	0.122971	0.117114	0.211326	0.550503	0.74347	0.649683
BTG4	0.0561609	0.0320917	0.0340631	0.113749	0.122157	0.0612846
BTK	4.11343	3.72391	4.17163	2.18386	2.61737	2.34284
BTLA	0.0151897	0.0273444	0.00968686	0.0161537	0.0115652	0.0225544
BTN1A1	0.060299	0.0196893	0.0522472	0.00872359	0	0.0188001
BTN2A1	12.5814	11.5271	12.2651	27.597	28.6746	28.8626
BTN2A2	23.209	20.3377	21.4724	16.3832	17.7032	16.7681
BTN2A3P	1.09408	1.12567	1.23925	1.62498	1.86443	1.76504
BTN3A1	44.8938	42.5509	44.1076	35.7877	40.0512	37.5696
BTN3A2	85.1175	81.8723	87.95	65.6124	73.4101	67.2046
BTN3A3	27.1244	26.3987	29.6026	18.5651	20.4028	18.8081
BTNL10	0.118315	0.135216	0.0478408	0	0.0571889	0.0430364
BTNL2	0	0	0	0	0.101147	0.038058
BTNL3	0	0	0	0	0	0
BTNL8	0.0162163	0.0185328	0.0196713	0.0164223	0.0235151	0.0530873
BTNL9	0.0544906	0.0388086	0.00836963	0.0139746	0.043026	0.0173054
BTRC	1.08072	1.15331	1.06484	3.42413	3.84713	3.57321
BUB1	31.3682	30.6533	29.631	45.8537	53.2397	46.5579
BUB1B	12.2904	12.3329	11.2685	20.7307	24.8751	22.2961
BUB1B-PAK6	0.386649	0.401282	0.345544	0.170521	0.157238	0.190651
BUB3	77.7491	80.9091	77.269	105.561	105.113	97.5889
BUD13	10.5701	10.0878	11.3075	20.5242	24.9242	22.2273
BUD23	321.839	319.445	315.599	195.257	188.836	195.862
BUD31	121.365	121.411	126.987	142.779	184.654	166.106
BVES	0.0177671	0.0457386	0.0322216	0.0981969	0.0643251	0.0767667
BVES-AS1	0	0	0	0	0	0
BYSL	25.5399	24.8238	24.0864	27.2906	26.9715	26.0979
BZW1	40.5047	40.1045	37.5564	45.0991	52.8634	44.2573
BZW2	106.706	108.752	105.77	144.929	149.128	136.798
C10orf105	0	0	0	0	0	0
C10orf111	0.208305	0.205027	0.207846	0.365862	0.434529	0.455275
C10orf113	0	0	0	0	0	0
C10orf120	0	0	0	0	0	0
C10orf126	0.66097	0.424078	0.801794	0.176149	0.319488	0.29104
C10orf142	0.452739	0.603647	0.579709	0.0509435	0.0729457	0.0548938
C10orf143	0.608349	0.544654	0.588555	0.459487	0.266782	0.315012
C10orf25	0.252753	0.270804	0.342091	0.543924	0.592441	0.637816
C10orf53	0.705843	0.591168	1.06325	0.293081	0.330108	0.476987
C10orf55	0.0197787	0.0663556	0.0599817	0.136466	0.0717021	0.165786
C10orf62	0	0	0	0	0	0
C10orf67	0.0835266	0.0477233	0.0607862	0.0676674	0.0242197	0.0820294
C10orf71	0.00450632	0	0	0	0	0
C10orf71-AS1	0	0	0	0	0	0
C10orf82	0.0187203	0	0	0	0	0
C10orf88	1.12082	1.11447	1.0245	2.97734	2.96829	2.75229
C10orf90	0.0252144	0.0093059	0.0154248	0	0	0
C10orf91	0.37839	0.432442	0.408008	0.638663	0.121933	0.55055
C10orf95	0.137319	0.206952	0.176808	0.18635	0.178011	0.236283
C10orf99	0	0	0	0	0	0.0393147
C11orf1	89.4563	80.319	92.716	89.4381	112.153	106.703
C11orf16	0	0.030048	0	0	0	0.0143455
[truncated: 26,070 more rows]
