# Supplementary material for: Epigenetic Plasticity Drives Carcinogenesis and Multi-Therapy Resistance in Multiple Myeloma
Source: Research Square preprint supplement (doi:10.21203/rs.3.rs-6306816/v1), 2025-04-15
Supplement: Supplementary file 15 [file b8603fe04adfd3da9b296a6e.xlsx]

## Sheet: Sheet1
DNA-binding protein	Pearson Correlation	Minus_Log10(Adj. P-value)	Maximum (∆Motif accessibility)
CEBPD	0.845224	133.727	2.64564
PAX5	0.783245	101.034	1.03294
SPI1	0.662957	60.8578	5.64674
ETS2	0.641586	55.6047	1.22144
NFKB1	0.590335	44.568	3.5909
STAT6	0.588985	44.3037	1.24576
CEBPA	0.578985	42.3833	3.45394
RELB	0.575476	41.725	2.57866
DDIT3	0.565263	39.8536	0.665786
ATF3	-0.559548	38.8346	1.3397
ZFHX3	-0.531926	34.177	0.29717
NFIA	0.513367	31.281	2.67211
NFKB2	0.510669	30.8745	2.88115
OTX1	0.498928	29.1478	0.339797
CEBPB	0.497007	28.8715	3.31857
ID1	-0.493368	28.353	1.32101
RELA	0.486446	27.3839	3.67352
ID2	-0.472437	25.4888	1.32101
LMO2	-0.467931	24.8977	3.19209
YBX1	0.458115	23.6398	0.978611
MEF2C	0.457649	23.5811	2.18292
NR1D1	0.455635	23.3284	0.429992
IRF8	-0.451651	22.8335	4.04779
MAFB	0.444184	21.9233	0.400345
EBF1	0.443908	21.8901	1.34681
RARA	0.442996	21.7805	0.929923
ELF2	0.437719	21.1531	2.14156
ELK3	-0.437697	21.1506	0.737392
BACH1	0.433526	20.6625	4.85903
MAFF	0.405767	17.5817	1.24739
FOSL2	0.40209	17.1947	5.41121
RUNX1	0.398568	16.8286	3.51599
MITF	0.389973	15.9532	0.8906
HIVEP1	0.383324	15.2936	2.26149
MEF2A	-0.381423	15.1076	2.04407
FOS	0.380489	15.0168	5.1539
HOXD4	0.370748	14.0863	0.530923
FOSB	0.37033	14.0471	3.95031
ETV4	0.370298	14.044	0.827683
MAFK	0.367843	13.8148	1.1213
NR4A1	0.366762	13.7145	0.803926
HOXD3	-0.36302	13.3702	0.326594
ETV1	0.361221	13.2063	0.901767
BHLHE41	-0.354385	12.5927	0.939868
ZBTB1	-0.352719	12.4455	0.466253
HLX	-0.350867	12.2828	0.653629
SRF	0.350767	12.2741	0.603049
MEF2B	0.340548	11.3957	2.0483
ZBTB7A	-0.337996	11.1813	0.340495
MAFG-DT	-0.337253	11.1193	0.568806
MAFA	-0.336819	11.0831	0.7087
ATF6	-0.334724	10.9094	0.808441
MECP2	-0.331798	10.669	0.194589
XBP1	0.32003	9.72755	0.605371
ESRRA	0.318458	9.60488	0.55334
CEBPZ	0.317909	9.56217	1.83879
TEAD1	0.31634	9.44068	0.443593
RXRA	0.314723	9.31628	0.53165
VENTX	-0.307061	8.73681	0.606298
ZNF35	0.305853	8.64698	0.757782
PPARA	-0.303679	8.48632	0.481927
KLF13	-0.302303	8.38538	1.13272
DUXA	0.30082	8.27713	0.313443
CTCF	0.292233	7.66246	2.04059
TGIF1	-0.287184	7.31057	0.668661
ZNF652	-0.285334	7.18339	0.321991
ZBTB7B	-0.284761	7.14416	0.439785
TCF4	0.283245	7.04088	5.33115
ATF4	0.28319	7.03711	1.83292
BCL6	0.282247	6.97318	0.259602
ZNF410	0.280291	6.8414	0.339712
TFEC	0.279011	6.75566	1.08627
YY1	0.273808	6.4118	0.86774
FOSL1	0.273373	6.38338	5.21138
TET1	0.270084	6.17009	0.331538
JUND	0.266262	5.9258	5.20997
SREBF1	0.265023	5.84742	0.605471
MAF	0.264748	5.83011	0.515409
MESP1	0.263311	5.73982	4.80833
ARNTL2	-0.262289	5.67597	1.24889
NR1I3	0.260524	5.56632	0.569252
SREBF2-AS1	-0.25966	5.5129	0.646748
RFX7	0.258693	5.45338	0.914392
FOXP2	0.258214	5.42397	1.01137
POU3F1	0.25711	5.35643	0.489644
ZNF143	0.252889	5.10117	0.575395
MIXL1	0.252201	5.06001	0.366988
MYC	-0.250171	4.93919	0.993084
HHEX	0.247681	4.79247	0.477077
ARX	0.24577	4.68096	0.49018
FOXM1	0.245376	4.6581	0.632061
ZFHX2	0.244892	4.63002	0.263863
ARID5B	-0.243672	4.55957	0.229973
KLF15	0.243111	4.52728	0.280847
HMG20B	0.241837	4.45433	0.66235
TGIF2LX	0.239522	4.32272	2.06548
KLF10	-0.239253	4.30751	1.13272
KLF3	0.238501	4.26509	1.13885
FOXD2-AS1	0.235651	4.10569	0.618993
FOXD4L3	0.234708	4.05338	1.00788
OSR2	-0.23441	4.03688	0.252593
TCF3	0.229866	3.78828	4.28186
NPAS3	-0.229729	3.78091	0.400868
AHR	-0.229443	3.76542	0.576689
KLF4	-0.229103	3.74705	0.859326
ARID5A	-0.228678	3.72416	0.511697
HIF1A	0.227814	3.67772	0.381505
NR2C1	0.226706	3.61843	1.36698
CIC	0.226691	3.61762	0.701376
ATOH8	-0.226492	3.60701	3.47334
RFX3	0.226354	3.59963	1.03548
FOXA1	0.225496	3.554	0.743739
CDC5L	0.225347	3.5461	0.342208
NR1H3	0.22521	3.53887	0.346631
NFIL3	0.224996	3.52752	1.08612
ELF1	0.224992	3.52727	0.963928
TOPORS	0.224813	3.51782	1.01063
SNAI1	-0.223581	3.4528	3.1162
KLF6	-0.22219	3.37986	0.853474
GABPA	0.220684	3.30144	0.692367
MGA	-0.219105	3.21978	1.01087
FOXJ3	0.218073	3.16674	1.02812
ZKSCAN1	-0.213476	2.93362	0.488978
TGIF2	-0.21322	2.92076	1.34083
ZHX1	0.212986	2.90905	0.323867
SMARCC2	0.211092	2.81471	0.576072
POU2F1	0.210352	2.77806	2.26531
FOXO3	0.208505	2.68723	1.02021
LIN54	0.20788	2.65663	0.676612
IRF9	-0.207675	2.64666	3.68842
MEOX2	0.205551	2.5436	0.371763
STAT1	-0.204323	2.48448	0.913355
IRF1	-0.203882	2.46336	2.59716
TFDP1	0.203843	2.46147	0.538999
ZSCAN16-AS1	-0.20237	2.39125	0.175346
MLXIP	-0.20091	2.3221	1.18638
ZNF784	-0.200734	2.31381	0.29564
GLIS3	0.20004	2.28117	0.370578
HOMEZ	0.198699	2.21836	0.462773
FOXJ2	-0.195785	2.08343	0.954163
SPZ1	-0.195732	2.08098	0.267759
NFYB	0.194241	2.0127	1.96315
IRF2	0.194014	2.00236	2.78604
