# Supplementary material for: Epigenetic Plasticity Drives Carcinogenesis and Multi-Therapy Resistance in Multiple Myeloma
Source: Research Square preprint supplement (doi:10.21203/rs.3.rs-6306816/v1), 2025-04-15
Supplement: Supplementary file 16 [file c10aa88dbe5facbac8ad0220.xlsx]

## Sheet: Sheet1
SE-regulated genes identified by ROSE in all 4 NDMM and 4 LRMM samples
AANAT
ADAMTSL4
AK1
AKR1D1
ALKBH4
ANKDD1A
ANXA6
APOBEC3A
APOBEC3B
APOBEC3C
APOBEC3D
APOBEC3F
APOBEC3G
ARAP1
ARF1
ARF6
ASCC1
ASPRV1
ATG16L2
ATP6AP1
ATP6V1E2
BAD
BCL2L1
BMF
BTG2
BUB1B
C10orf105
C1orf35
C1QTNF6
CASP10
CATSPERZ
CCDC117
CCDC69
CCDC88B
CCDC88C
CCNE2
CD300LF
CD48
CDK9
CFLAR
CHD2
CHEK2
CHIT1
CHST15
CIC
COL8A2
CPLX3
CREB3L2
CRIPT
CSK
CXXC5
CYP1A1
CYTH1
CYTH4
DDIT4
DEDD2
DNAJB12
DNAJC4
DNASE1L1
DPM2
DUSP22
DUX4
EAPP
EHBP1L1
ELL2
EMD
ENDOU
ENG
EPHX2
EPPK1
ERF
ERN1
ESRRA
FAM126B
FAM174B
FAM50A
FAM89B
FBXW7
FERMT3
FKBP2
FLI1
FLNA
FNDC3B
FPGS
FRG2B
GDI1
GJC2
GLRX
GM2A
GNG7
GPR137
GPR68
GRINA
GSK3A
GUK1
GYPC
HDAC7
HSCB
HSD17B4
IBA57
ICAM2
IKZF1
IL2RB
INPP4A
IRF1
IRF4
KCNK4
KCNK7
KLF2
KLHDC7B
KLHL6
LMAN1L
LMF2
LOC105370624
LOC107986153
LOC114841035
LRWD1
LTBP3
LY9
MACROD1
MAP7D1
MCL1
MEF2D
MEGF8
MIDEAS
MRPL55
MRPS28
MZB1
NAT9
NEMF
NPIPB3
NUAK2
NUDT22
ODF3B
ORAI2
PCBP1
PCNX3
PIF1
PIP5KL1
PLCB3
PLEC
PLEKHO2
PLXNA3
PNMA1
POLR2J
PPP1R14B
PRCD
PRDX5
PRKCD
PRKRIP1
PROB1
PRR19
PSD2
PTK2B
PTMA
PTRH1
RAC2
RAD50
RAPGEF3
RASA2
RBPMS2
RFT1
RHBDF2
RHOQ
RPAP3
RPL10
RPS6KA4
RTP1
SBF1
SCO2
SELPLG
SH2D3C
SIPA1
SLAMF1
SLAMF7
SLC23A1
SLC48A1
SLC9A3R1
SPATA24
SPATC1
SPDYE6
SRP14
SSTR3
ST6GALNAC4
ST6GALNAC6
STARD10
STIP1
STMN4
TAFAZZIN
TENT5C
TEX28
THRAP3
TMEM104
TMEM119
TMEM145
TNFAIP8
TNIP1
TOR2A
TP53INP1
TPX2
TRAPPC3
TRIM35
TRMT112
TRPT1
TYMP
UBE2O
VEGFB
VOPP1
VPS37B
VSIR
XBP1
ZNRD2
ZNRF3
