# Supplementary material for: Epigenetic Plasticity Drives Carcinogenesis and Multi-Therapy Resistance in Multiple Myeloma
Source: Research Square preprint supplement (doi:10.21203/rs.3.rs-6306816/v1), 2025-04-15
Supplement: Supplementary file 17 [file d6e4cdf306e132973225dda3.xlsx]

## Sheet: NDMM1
seqnames	start	end	width	strand	NUM_LOCI	CONSTITUENT_SIZE	BAM_SIG	isSuper	seqnames	start	end	width	strand	CSS	CSE	Tx	Geneid	Gene	Refseq	Nexons	Exons
chr14	91303335	91447578	144244	*	27	20021	160094	TRUE	chr14	91232532	91253925	21394	-	91233953	91235050	8111	8111	GPR68	NM_001177676 NM_001348437 NM_003485 NP_001171147 NP_001335366 NP_003476 XM_005268110 XM_005268111 XM_005268112 XM_006720262 XM_011537196 XM_011537197 XM_011537198 XM_011537199 XP_005268167 XP_005268168 XP_005268169 XP_006720325 XP_011535498 XP_011535499 XP_011535500 XP_011535501	4
chr14	91303335	91447578	144244	*	27	20021	160094	TRUE	chr14	91271323	91417820	146498	-	91272625	91417690	440193	440193	CCDC88C	NM_001080414 NP_001073883 XM_005267691 XM_011536796 XM_017021335 XM_017021336 XM_017021337 XP_005267748 XP_011535098 XP_016876824 XP_016876825 XP_016876826 XR_429316	33
chr14	91303335	91447578	144244	*	27	20021	160094	TRUE	chr14	91378641	91417844	39204	-	91379865	91417690	105370624	105370624	LOC105370624	XR_944148 XR_944149	5
chr5	132398522	132525520	126999	*	16	16804	125561	TRUE	chr5	132410832	132646349	235518	+	132557325	132643089	10111	10111	RAD50	NM_005732 NM_133482 NP_005723	35
chr5	132398522	132525520	126999	*	16	16804	125561	TRUE	chr5	132440440	132508719	68280	-	132449620	132489478	3659	3659	IRF1	NM_001354924 NM_001354925 NM_002198 NP_001341853 NP_001341854 NP_002189 NR_149068 NR_149069 XM_011543379 XP_011541681	14
chr7	55464315	55594353	130039	*	20	17216	116563	TRUE	chr7	55436056	55572988	136933	-	55472855	55572324	81552	81552	VOPP1	NM_001284282 NM_001284283 NM_001284284 NM_001321242 NM_001321243 NM_001321244 NM_001321246 NM_001321247 NM_001321248 NM_001321249 NM_001321250 NM_001321251 NM_030796 NP_001271211 NP_001271212 NP_001271213 NP_001308171 NP_001308172 NP_001308173 NP_001308175 NP_001308176 NP_001308177 NP_001308178 NP_001308179 NP_001308180 NP_110423 XM_011515539 XM_011515540 XM_011515541 XM_011515546 XP_011513841 XP…	20
chr3	141352537	141471796	119260	*	23	15796	114430	TRUE	chr3	141487027	141615344	128318	+	141487084	141612313	5922	5922	RASA2	NM_001303245 NM_001303246 NM_006506 NP_001290174 NP_001290175 NP_006497 XM_011513059 XM_017006968 XM_017006969 XM_017006970 XM_017006971 XM_024453691 XP_011511361 XP_016862457 XP_016862458 XP_016862459 XP_016862460 XP_024309459	27
chr3	172039267	172190161	150895	*	29	19339	108012	TRUE	chr3	172039578	172401669	362092	+	172112480	172397475	64778	64778	FNDC3B	NM_001135095 NM_022763 NP_001128567 NP_073600 XM_017007062 XM_017007063 XM_017007064 XM_024453716 XM_024453717 XP_016862551 XP_016862552 XP_016862553 XP_024309484 XP_024309485	29
chr3	172039267	172190161	150895	*	29	19339	108012	TRUE	chr3	172039628	172187298	147671	+	172112480	172186740	107986153	107986153	LOC107986153	XR_001741020	6
chr3	186975266	187165565	190300	*	29	20147	104975	TRUE	chr3	187197486	187201462	3977	+	187197516	187200070	132112	132112	RTP1	NM_153708 NP_714919	2
chr1	117594370	117687836	93467	*	20	13623	95580.4	TRUE	chr1	117606048	117628389	22342	+	117622869	117624044	54855	54855	TENT5C	NM_017709 NP_060179	2
chr15	94222100	94325760	103661	*	19	15298	88318.3	TRUE	chr15	94231538	94483952	252415	+	94298266	94479034	55784	55784	MCTP2	NM_001159643 NM_001159644 NM_001385001 NM_001385002 NM_001385003 NM_001385004 NM_001385005 NM_001385006 NM_001385007 NM_001385008 NM_001385009 NM_001385010 NM_001385011 NM_018349 NP_001153115 NP_001153116 NP_001371930 NP_001371931 NP_001371932 NP_001371933 NP_001371934 NP_001371935 NP_001371936 NP_001371937 NP_001371938 NP_001371939 NP_001371940 NP_060819 NR_169526 NR_169527 NR_169528 NR_169529 N…	29
chr11	64185283	64318409	133127	*	17	19057	87942.1	TRUE	chr11	64185272	64204543	19272	+	64185825	64204126	10963	10963	STIP1	NM_001282652 NM_001282653 NM_006819 NP_001269581 NP_001269582 NP_006810	16
chr11	64185283	64318409	133127	*	17	19057	87942.1	TRUE	chr11	64206678	64223891	17214	+	64207365	64223492	83706	83706	FERMT3	NM_001382361 NM_001382362 NM_001382363 NM_001382364 NM_001382448 NM_031471 NM_178443 NP_001369290 NP_001369291 NP_001369292 NP_001369293 NP_001369377 NP_113659 NP_848537	14
chr11	64185283	64318409	133127	*	17	19057	87942.1	TRUE	chr11	63998558	64166113	167556	-	63998656	64165994	28992	28992	MACROD1	NM_014067 NP_054786 XM_005273939 XM_005273940 XM_006718521 XM_006718522 XM_011544970 XP_005273996 XP_005273997 XP_006718584 XP_006718585 XP_011543272	16
chr11	64185283	64318409	133127	*	17	19057	87942.1	TRUE	chr11	64225941	64230686	4746	+	64226653	64229990	84304	84304	NUDT22	NM_001128612 NM_001128613 NM_001271831 NM_032344 NP_001122084 NP_001122085 NP_001258760 NP_115720 XM_024448714 XM_024448715 XM_024448716 XP_024304482 XP_024304483 XP_024304484	5
chr11	64185283	64318409	133127	*	17	19057	87942.1	TRUE	chr11	64230278	64234286	4009	+	64230855	64234184	3338	3338	DNAJC4	NM_001307980 NM_001307981 NM_005528 NP_001294909 NP_001294910 NP_005519	6
chr11	64185283	64318409	133127	*	17	19057	87942.1	TRUE	chr11	64234584	64239264	4681	+	64234834	64238377	7423	7423	VEGFB	NM_001243733 NM_003377 NP_001230662 NP_003368	8
chr11	64185283	64318409	133127	*	17	19057	87942.1	TRUE	chr11	64241003	64244132	3130	+	64241665	64244029	2286	2286	FKBP2	NM_001135208 NM_001370360 NM_001370362 NM_001370363 NM_001370365 NM_001370367 NM_004470 NM_057092 NP_001128680 NP_001357289 NP_001357291 NP_001357292 NP_001357294 NP_001357296 NP_004461 NP_476433	7
chr11	64185283	64318409	133127	*	17	19057	87942.1	TRUE	chr11	64241095	64244132	3038	+	64241280	64243472	114841035	114841035	LOC114841035	NM_001370414 NP_001357343	6
chr11	64185283	64318409	133127	*	17	19057	87942.1	TRUE	chr11	64251530	64269150	17621	+	64251650	64267556	5331	5331	PLCB3	NM_000932 NM_001184883 NM_001316314 NP_000923 NP_001171812 NP_001303243 XM_011545101 XM_017017925 XP_011543403 XP_016873414	32
chr11	64185283	64318409	133127	*	17	19057	87942.1	TRUE	chr11	64270062	64289500	19439	+	64270659	64289365	56834	56834	GPR137	NM_001170726 NM_001170880 NM_001170881 NM_001177358 NM_001378076 NM_001378077 NM_001378078 NM_001378079 NM_001378080 NM_001378081 NM_001378082 NM_001378083 NM_001378084 NM_001378085 NM_001378086 NM_001378087 NM_001378088 NM_001378089 NM_020155 NP_001164351 NP_001164352 NP_001170829 NP_001365005 NP_001365006 NP_001365007 NP_001365008 NP_001365009 NP_001365010 NP_001365011 NP_001365012 NP_001365013…	14
chr11	64185283	64318409	133127	*	17	19057	87942.1	TRUE	chr11	64223799	64226254	2456	-	64223876	64225860	83707	83707	TRPT1	NM_001033678 NM_001160389 NM_001160390 NM_001160392 NM_001160393 NM_001330298 NM_031472 NP_001028850 NP_001153861 NP_001153862 NP_001153864 NP_001153865 NP_001317227 NP_113660 XM_005274345 XM_005274346 XM_005274347 XM_006718706 XM_006718707 XM_017018400 XM_024448708 XM_024448709 XP_005274402 XP_005274403 XP_005274404 XP_006718769 XP_006718770 XP_016873889 XP_024304476 XP_024304477	3
chr11	64185283	64318409	133127	*	17	19057	87942.1	TRUE	chr11	64291302	64300031	8730	+	64293019	64299824	50801	50801	KCNK4	NM_001317090 NM_016611 NM_033310 NP_001304019 NP_201567 NR_133660 NR_133661	7
chr11	64185283	64318409	133127	*	17	19057	87942.1	TRUE	chr11	64244479	64246943	2465	-	64244754	64246673	26472	26472	PPP1R14B	NM_138689 NP_619634	5
chr11	64185283	64318409	133127	*	17	19057	87942.1	TRUE	chr11	64300358	64304770	4413	+	64300411	64304646	25858	25858	CATSPERZ	NM_001039496 NP_001034585	5
chr11	64185283	64318409	133127	*	17	19057	87942.1	TRUE	chr11	64305497	64316743	11247	+	64305497	64315966	2101	2101	ESRRA	NM_001282450 NM_001282451 NM_004451 NP_001269379 NP_001269380 NP_004442 XM_017017313 XP_016872802	8
chr11	64185283	64318409	133127	*	17	19057	87942.1	TRUE	chr11	64318121	64321811	3691	+	64318216	64321691	25824	25824	PRDX5	NM_001358511 NM_001358516 NM_012094 NM_181651 NM_181652 NP_001345440 NP_001345445 NP_036226 NP_857634 NP_857635	6
chr11	64185283	64318409	133127	*	17	19057	87942.1	TRUE	chr11	64269830	64284704	14875	-	64270051	64284368	572	572	BAD	NM_004322 NM_032989 NP_004313 NP_116784	5
chr11	64185283	64318409	133127	*	17	19057	87942.1	TRUE	chr11	64340204	64357534	17331	+	64340267	64357488	283234	283234	CCDC88B	NM_032251 NP_115627 XM_006718519 XM_011544957 XM_011544959 XM_011544960 XM_011544962 XM_017017601 XM_024448450 XM_024448451 XP_006718582 XP_011543259 XP_011543261 XP_011543262 XP_011543264 XP_016873090 XP_024304218 XP_024304219 XR_002957140 XR_949893 XR_949894	24
chr11	64185283	64318409	133127	*	17	19057	87942.1	TRUE	chr11	64359148	64372215	13068	+	64359236	64371480	8986	8986	RPS6KA4	NM_001006944 NM_001300802 NM_001318361 NM_003942 NP_001006945 NP_001287731 NP_001305290 NP_003933 XM_005274380 XM_017018527 XP_005274437 XP_016874016	17
chr11	64185283	64318409	133127	*	17	19057	87942.1	TRUE	chr11	64316460	64317559	1100	-	64316861	64317526	51504	51504	TRMT112	NM_001286082 NM_001286084 NM_001372071 NM_001372072 NM_016404 NP_001273011 NP_001273013 NP_001359000 NP_001359001 NP_057488	1
chr5	139633434	139711186	77753	*	13	13380	84978.3	TRUE	chr5	139647299	139683882	36584	+	139680524	139682907	51523	51523	CXXC5	NM_001317199 NM_001317200 NM_001317201 NM_001317202 NM_001317203 NM_001317204 NM_001317205 NM_001317206 NM_001317207 NM_001317208 NM_001317209 NM_001317210 NM_001317211 NM_016463 NP_001304128 NP_001304129 NP_001304130 NP_001304131 NP_001304132 NP_001304133 NP_001304134 NP_001304135 NP_001304136 NP_001304137 NP_001304138 NP_001304139 NP_001304140 NP_057547	11
chr5	139633434	139711186	77753	*	13	13380	84978.3	TRUE	chr5	139684645	139844466	159822	+	139809441	139842474	84249	84249	PSD2	NM_032289 NP_115665 XM_011537696 XM_017009976 XM_017009977 XP_011535998 XP_016865465 XP_016865466	21
chr5	119268084	119406055	137972	*	25	17937	80561.3	TRUE	chr5	119268692	119399688	130997	+	119268907	119393381	25816	25816	TNFAIP8	NM_001077654 NM_001286813 NM_001286814 NM_001286815 NM_001286817 NM_014350 NP_001071122 NP_001273742 NP_001273743 NP_001273744 NP_001273746 NP_055165 XM_017009327 XM_017009328 XP_016864816 XP_016864817	7
chr5	119268084	119406055	137972	*	25	17937	80561.3	TRUE	chr5	119452465	119637199	184735	+	119452576	119584429	3295	3295	HSD17B4	NM_000414 NM_001199291 NM_001199292 NM_001292027 NM_001292028 NM_001374497 NM_001374498 NM_001374499 NM_001374500 NM_001374501 NM_001374502 NM_001374503 NP_000405 NP_001186220 NP_001186221 NP_001278956 NP_001278957 NP_001361426 NP_001361427 NP_001361428 NP_001361429 NP_001361430 NP_001361431 NP_001361432 NR_164653 NR_164654	34
chr7	50296815	50379668	82854	*	15	11631	79102.9	TRUE	chr7	50304068	50405101	101034	+	50319062	50400627	10320	10320	IKZF1	NM_001220765 NM_001220766 NM_001220767 NM_001220768 NM_001220769 NM_001220770 NM_001220771 NM_001220772 NM_001220773 NM_001220774 NM_001220775 NM_001220776 NM_001291837 NM_001291838 NM_001291839 NM_001291840 NM_001291841 NM_001291842 NM_001291843 NM_001291844 NM_001291845 NM_001291846 NM_001291847 NM_006060 NP_001207694 NP_001207696 NP_001207697 NP_001207699 NP_001207700 NP_001278766 NP_001278767…	13
chr15	81265222	81336863	71642	*	11	10005	73157.1	TRUE	chr15	81309053	81324183	15131	-	81313256	81324099	80765	80765	STARD5	NM_030574 NM_181900 NP_871629 NR_135013	4
chr7	137923787	138039131	115345	*	18	12384	72766.5	TRUE	chr7	138002324	138118305	115982	+	138076519	138116662	6718	6718	AKR1D1	NM_001190906 NM_001190907 NM_005989 NP_001177835 NP_001177836 NP_005980	12
chr7	137923787	138039131	115345	*	18	12384	72766.5	TRUE	chr7	137874979	138002086	127108	-	137880476	138001705	64764	64764	CREB3L2	NM_001253775 NM_001318246 NM_194071 NP_001240704 NP_001305175 NP_919047 XM_005250541 XM_017012540 XP_005250598 XP_016868029	15
chr6	296352	354748	58397	*	14	9535	69706.6	TRUE	chr6	291630	351355	59726	+	292540	350868	56940	56940	DUSP22	NM_001286555 NM_020185 NP_001273484 NP_064570 NR_104473 NR_104474 NR_104475 XM_011514757 XM_017011061 XM_017011062 XP_011513059 XP_016866550 XP_016866551	11
chr6	296352	354748	58397	*	14	9535	69706.6	TRUE	chr6	391752	411443	19692	+	393153	407598	3662	3662	IRF4	NM_001195286 NM_002460 NP_001182215 NP_002451 NR_036585 NR_046000 XM_006715090 XP_006715153	10
chr11	128685954	128759544	73591	*	15	13143	66876.6	TRUE	chr11	128686535	128813267	126733	+	128694259	128810988	2313	2313	FLI1	NM_001167681 NM_001271010 NM_001271012 NM_002017 NP_001161153 NP_001257939 NP_001257941 NP_002008 XM_011542701 XM_011542702 XM_017017405 XM_017017406 XP_011541003 XP_011541004 XP_016872894 XP_016872895	12
chr10	124017572	124127881	110310	*	17	12308	65148	TRUE	chr10	124007668	124093598	85931	-	124010149	124046212	51363	51363	CHST15	NM_001270764 NM_001270765 NM_014863 NM_015892 NP_001257693 NP_001257694 NP_055678 NP_056976 XM_005269891 XM_005269892 XM_005269893 XM_005269894 XM_006717891 XM_011539857 XM_017016319 XM_017016320 XM_017016321 XP_005269948 XP_005269949 XP_005269950 XP_005269951 XP_006717954 XP_011538159 XP_016871808 XP_016871809 XP_016871810	9
chr1	203263379	203328083	64705	*	8	10937	64197.2	TRUE	chr1	203305491	203309602	4112	+	203305607	203307438	7832	7832	BTG2	NM_006763 NP_006754	2
chr1	203263379	203328083	64705	*	8	10937	64197.2	TRUE	chr1	203212827	203272809	59983	-	203216889	203229636	1118	1118	CHIT1	NM_001256125 NM_001270509 NM_003465 NP_001243054 NP_003456 NR_045784 NR_045785	18
chr15	63462404	63518007	55604	*	8	8755	64097.4	TRUE	chr15	63504511	63594640	90130	+	63504740	63590826	9960	9960	USP3	NM_001256702 NM_006537 NP_001243631 NP_006528 NR_046341 NR_046342 XM_017022763 XM_017022764 XM_017022765 XM_017022766 XM_017022767 XM_017022768 XP_016878252 XP_016878253 XP_016878254 XP_016878255 XP_016878256 XP_016878257	23
chr7	102395676	102495104	99429	*	16	17855	63691.4	TRUE	chr7	102396363	102426666	30304	+	102396412	102425111	79706	79706	PRKRIP1	NM_024653 NP_078929	6
chr7	102395676	102495104	99429	*	16	17855	63691.4	TRUE	chr7	102345746	102356444	10699	-	102348102	102356023	729597	729597	SPDYE6	NM_001146210 NP_001139682	8
chr7	102395676	102495104	99429	*	16	17855	63691.4	TRUE	chr7	102433106	102456825	23720	+	102438957	102447052	80228	80228	ORAI2	NM_001126340 NM_001271818 NM_001271819 NM_032831 NP_001119812 NP_001258747 NP_001258748 NP_116220	5
chr7	102395676	102495104	99429	*	16	17855	63691.4	TRUE	chr7	102464956	102473168	8213	+	102465081	102473049	222229	222229	LRWD1	NM_001317721 NM_152892 NP_001304650 NP_690852	7
chr7	102395676	102495104	99429	*	16	17855	63691.4	TRUE	chr7	102456238	102464863	8626	-	102457394	102464836	54784	54784	ALKBH4	NM_017621 NP_060091 XM_005250464 XM_005250465 XP_005250521 XP_005250522	3
chr7	102395676	102495104	99429	*	16	17855	63691.4	TRUE	chr7	102473128	102478922	5795	-	102473649	102478860	5439	5439	POLR2J	NM_001371100 NM_001393919 NM_006234 NP_001358029 NP_001380848 NP_006225 NR_163857 XM_017012353 XP_016867842	4
chr5	151047862	151115741	67880	*	8	7193	62015.3	TRUE	chr5	151029945	151093577	63633	-	151030070	151065095	10318	10318	TNIP1	NM_001252385 NM_001252386 NM_001252390 NM_001252391 NM_001252392 NM_001252393 NM_001258454 NM_001258455 NM_001258456 NM_001364486 NM_001364487 NM_006058 NP_001239314 NP_001239315 NP_001239319 NP_001239320 NP_001239321 NP_001239322 NP_001245383 NP_001245384 NP_001245385 NP_001351415 NP_001351416 NP_006049 XM_005268355 XM_006714752 XM_017008945 XM_017008946 XM_017008947 XM_017008948 XM_017008949 XM…	24
chr15	40030463	40136560	106098	*	14	14168	61942.6	TRUE	chr15	40035690	40039181	3492	-	40036333	40039116	6727	6727	SRP14	NM_001309434 NM_003134 NP_001296363 NP_003125	5
chr15	40030463	40136560	106098	*	14	14168	61942.6	TRUE	chr15	40087890	40108892	21003	-	40091787	40106086	90427	90427	BMF	NM_001003940 NM_001003942 NM_001003943 NM_001398495 NM_001398496 NM_001398497 NM_001398498 NM_001398499 NM_001398500 NM_001398501 NM_001398502 NM_001398503 NM_001398504 NM_001398505 NM_001398506 NM_001398507 NM_001398508 NM_001398509 NM_001398510 NM_033503 NP_001003940 NP_001003942 NP_001003943 NP_001385424 NP_001385425 NP_001385426 NP_001385427 NP_001385428 NP_001385429 NP_001385430 NP_001385431…	7
chr15	40030463	40136560	106098	*	14	14168	61942.6	TRUE	chr15	40161023	40221123	60101	+	40161221	40220759	701	701	BUB1B	NM_001211 NP_001202	24
chr5	100774884	100903748	128865	*	18	14677	60981.2	TRUE	chr5	100806933	100903282	96350	-	100811847	100902955	7903	7903	ST8SIA4	NM_005668 NM_175052 NP_005659 NP_778222 XM_005272078 XM_011543630 XP_005272135 XP_011541932	7
chr15	70014563	70099511	84949	*	15	10818	60052.8	TRUE	chr15	70047790	70098176	50387	-	70050097	70096798	7090	7090	TLE3	NM_001105192 NM_001282979 NM_001282980 NM_001282981 NM_001282982 NM_005078 NM_020908 NP_001098662 NP_001269908 NP_001269909 NP_001269910 NP_001269911 NP_005069 NP_065959 XM_005254622 XM_005254623 XM_005254625 XM_005254628 XM_005254633 XM_006720665 XM_011521976 XM_011521977 XM_011521978 XM_011521979 XM_011521980 XM_011521981 XM_011521982 XM_011521983 XM_017022532 XP_005254679 XP_005254680 XP_00525…	15
chr3	53123265	53191273	68009	*	11	9704	58392.6	TRUE	chr3	53156009	53192717	36709	+	53178423	53192266	5580	5580	PRKCD	NM_001316327 NM_001354676 NM_001354678 NM_001354679 NM_001354680 NM_006254 NM_212539 NP_001303256 NP_001341605 NP_001341607 NP_001341608 NP_001341609 NP_006245 NP_997704 XR_002959550	24
chr3	53123265	53191273	68009	*	11	9704	58392.6	TRUE	chr3	52969119	53130453	161335	-	53077781	53130400	91869	91869	RFT1	NM_052859 NP_443091 XM_005265537 XM_006713384 XM_011534214 XM_011534215 XM_011534216 XM_017007460 XM_017007461 XP_005265594 XP_006713447 XP_011532516 XP_011532517 XP_011532518 XP_016862949 XP_016862950 XR_001740360	22
chr5	95807941	95880054	72114	*	13	11165	58097.3	TRUE	chr5	95751319	95822726	71408	-	95816513	95822662	2745	2745	GLRX	NM_001118890 NM_001243658 NM_001243659 NM_002064 NP_001112362 NP_001230587 NP_001230588 NP_002055	7
chr2	98438357	98520326	81970	*	12	11738	57352.5	TRUE	chr2	98444854	98594392	149539	+	98520049	98587608	3631	3631	INPP4A	NM_001134224 NM_001134225 NM_001351424 NM_001351425 NM_001351426 NM_001351427 NM_001351428 NM_001351429 NM_001566 NM_004027 NP_001127696 NP_001127697 NP_001338353 NP_001338354 NP_001338355 NP_001338356 NP_001338357 NP_001338358 NP_001557 NP_004018 XM_006712499 XM_006712500 XM_006712501 XM_006712502 XM_006712503 XM_006712504 XM_006712505 XM_006712506 XM_006712508 XM_011511122 XM_011511123 XM_01151…	32
chr10	133637368	133690250	52883	*	7	7195	56766.4	TRUE	chr10	133623895	133626795	2901	-	133625099	133626742	441581	441581	FRG2B	NM_001080998 NP_001074467	4
chr11	65539739	65598292	58554	*	9	8148	56510.2	TRUE	chr11	65570460	65572892	2433	+	65570492	65572480	10534	10534	ZNRD2	NM_001303024 NM_006396 NP_001289953 NP_006387	4
chr11	65539739	65598292	58554	*	9	8148	56510.2	TRUE	chr11	65570682	65574198	3517	+	65570682	65573641	23625	23625	FAM89B	NM_001098784 NM_001098785 NM_152832 NP_001092254 NP_001092255 NP_690045	4
chr11	65539739	65598292	58554	*	9	8148	56510.2	TRUE	chr11	65576046	65592650	16605	+	65576303	65592302	254102	254102	EHBP1L1	NM_001099409 NM_001351087 NP_001092879 NP_001338016 XM_005273867 XM_005273868 XM_005273869 XM_005273870 XM_006718486 XM_006718487 XM_011544886 XM_017017467 XM_017017468 XM_024448416 XP_005273924 XP_005273925 XP_005273926 XP_005273927 XP_006718549 XP_006718550 XP_011543188 XP_016872956 XP_016872957 XP_024304184	20
chr11	65539739	65598292	58554	*	9	8148	56510.2	TRUE	chr11	65538559	65558930	20372	-	65539080	65557959	4054	4054	LTBP3	NM_001130144 NM_001164266 NM_021070 NP_001123616 NP_001157738 NP_066548	26
chr11	65539739	65598292	58554	*	9	8148	56510.2	TRUE	chr11	65615776	65637439	21664	+	65616312	65636978	399909	399909	PCNX3	NM_032223 NP_115599 XM_005273987 XM_005273990 XM_006718549 XM_011545024 XM_011545025 XM_011545026 XM_011545027 XM_011545028 XP_005274044 XP_005274047 XP_006718612 XP_011543326 XP_011543327 XP_011543328 XP_011543329 XP_011543330 XR_002957146	35
chr11	65539739	65598292	58554	*	9	8148	56510.2	TRUE	chr11	65638101	65650918	12818	+	65640922	65650715	6494	6494	SIPA1	NM_006747 NM_153253 NP_006738 NP_694985 XM_005274189 XP_005274246 XR_247210	19
chr11	65539739	65598292	58554	*	9	8148	56510.2	TRUE	chr11	65592836	65595996	3161	-	65593005	65595772	10089	10089	KCNK7	NM_005714 NM_033347 NM_033348 NM_033455 NM_033456 NP_005705 NP_203133 NP_203134 NP_258416	2
chr5	157457965	157556915	98951	*	10	10289	56027.8	TRUE	chr5	157460213	157474722	14510	+	157460255	157472960	348938	348938	NIPAL4	NM_001099287 NM_001172292 NP_001092757 NP_001165763 XM_011534552 XM_024446043 XP_011532854 XP_024301811	7
chr5	157457965	157556915	98951	*	10	10289	56027.8	TRUE	chr5	157341596	157460100	118505	-	157342862	157343536	408263	408263	FNDC9	NM_001001343 NP_001001343	6
chr15	74770973	74808423	37451	*	9	7213	55246.6	TRUE	chr15	74719542	74725536	5995	-	74720489	74723097	1543	1543	CYP1A1	NM_000499 NM_001319216 NM_001319217 NP_000490 NP_001306145 NP_001306146	7
chr15	74770973	74808423	37451	*	9	7213	55246.6	TRUE	chr15	74782080	74803197	21118	+	74798298	74802513	1445	1445	CSK	NM_001127190 NM_001354988 NM_001387089 NM_001387090 NM_001387091 NM_001387092 NM_001387093 NM_001387094 NM_001387095 NM_001387096 NM_001387097 NM_001387098 NM_004383 NP_001120662 NP_001341917 NP_001374018 NP_001374019 NP_001374020 NP_001374021 NP_001374022 NP_001374023 NP_001374024 NP_001374025 NP_001374026 NP_001374027 NP_004374 NR_170550	10
chr15	74770973	74808423	37451	*	9	7213	55246.6	TRUE	chr15	74812716	74831233	18518	+	74812855	74825605	79748	79748	LMAN1L	NM_021819 NP_068591	13
chr15	74770973	74808423	37451	*	9	7213	55246.6	TRUE	chr15	74821074	74831802	10729	+	74826704	74830354	594855	594855	CPLX3	NM_001030005 NP_001025176	6
chr15	90000486	90059984	59499	*	12	9709	54863.1	TRUE	chr15	90001324	90082191	80868	+	90067138	90079829	374655	374655	ZNF710	NM_198526 NP_940928 XM_005254906 XM_005254907 XM_011521540 XM_011521541 XM_011521542 XM_011521543 XM_011521544 XP_005254963 XP_005254964 XP_011519842 XP_011519843 XP_011519844 XP_011519845 XP_011519846	6
chr12	47734789	47852355	117567	*	16	12101	54668.6	TRUE	chr12	47661249	47706030	44782	-	47663505	47702840	79657	79657	RPAP3	NM_001146075 NM_001146076 NM_024604 NP_001139547 NP_001139548 NP_078880	19
chr12	47734789	47852355	117567	*	16	12101	54668.6	TRUE	chr12	47753916	47782751	28836	+	47773305	47780281	55652	55652	SLC48A1	NM_017842 NP_060312 XM_005269016 XM_017019612 XM_017019614 XM_017019617 XM_024449045 XM_024449046 XP_005269073 XP_016875101 XP_016875103 XP_016875106 XP_024304813 XP_024304814	12
chr12	47734789	47852355	117567	*	16	12101	54668.6	TRUE	chr12	47709734	47725567	15834	-	47710802	47725413	8909	8909	ENDOU	NM_001172439 NM_001172440 NM_006025 NP_001165910 NP_001165911 NP_006016	10
chr12	47734789	47852355	117567	*	16	12101	54668.6	TRUE	chr12	47734363	47771040	36678	-	47737567	47758556	10411	10411	RAPGEF3	NM_001098531 NM_001098532 NM_006105 NP_001092001 NP_001092002 NP_006096 XM_005268571 XM_011537752 XM_011537755 XM_011537758 XM_017018688 XM_024448795 XP_005268628 XP_011536054 XP_011536057 XP_011536060 XP_016874177 XP_024304563 XR_001748550 XR_001748551 XR_002957282	27
chr12	47734789	47852355	117567	*	16	12101	54668.6	TRUE	chr12	47782722	47833132	50411	-	47783841	47819785	51564	51564	HDAC7	NM_001098416 NM_001308090 NM_001368046 NM_015401 NM_016596 NP_001091886 NP_001295019 NP_001354975 NP_056216 NR_160435 NR_160436 XM_011538478 XM_011538480 XM_011538481 XM_011538482 XM_011538483 XM_017019455 XM_017019456 XM_024449018 XP_011536780 XP_011536782 XP_011536783 XP_011536784 XP_011536785 XP_016874944 XP_016874945 XP_024304786 XR_001748761	27
chr19	2595794	2699821	104028	*	14	12205	53717.7	TRUE	chr19	2511219	2702694	191476	-	2515022	2520688	2788	2788	GNG7	NM_052847 NP_443079 XM_017026606 XP_016882095	7
chr15	64815800	64912767	96968	*	15	11302	52677.9	TRUE	chr15	64739891	64775589	35699	-	64741180	64775319	348093	348093	RBPMS2	NM_194272 NP_919248 NR_138350 NR_138363 NR_138364	9
chr15	64815800	64912767	96968	*	15	11302	52677.9	TRUE	chr15	64841883	64930920	89038	+	64842017	64930920	80301	80301	PLEKHO2	NM_001195059 NM_025201 NP_001181988 NP_079477	8
chr15	64815800	64912767	96968	*	15	11302	52677.9	TRUE	chr15	64815632	64825668	10037	-	64815691	64824335	80119	80119	PIF1	NM_001286496 NM_001286497 NM_001286499 NM_025049 NP_001273425 NP_001273426 NP_001273428 NP_079325 XM_011522083 XM_011522084 XP_011520385 XP_011520386 XR_931915	11
chr15	64815800	64912767	96968	*	15	11302	52677.9	TRUE	chr15	64911902	64958691	46790	+	64911931	64957188	348094	348094	ANKDD1A	NM_182703 NP_874362	18
chr15	90074928	90102940	28013	*	6	5908	52516.9	TRUE	chr15	90083045	90102477	19433	-	90084266	90102390	3418	3418	IDH2	NM_001289910 NM_001290114 NM_002168 NP_001276839 NP_001277043 NP_002159	12
chr7	47521398	47582423	61026	*	18	11994	52259.7	TRUE	chr7	47275154	47582558	307405	-	47278076	47582471	64759	64759	TNS3	NM_022748 NP_073585 XM_011515476 XM_011515477 XM_011515478 XM_011515479 XM_011515480 XM_011515481 XM_011515483 XM_011515484 XM_017012537 XM_017012538 XM_024446876 XP_011513778 XP_011513779 XP_011513780 XP_011513781 XP_011513782 XP_011513783 XP_011513785 XP_011513786 XP_016868026 XP_016868027 XP_024302644	40
chr15	92803872	92850376	46505	*	10	10005	52197.3	TRUE	chr15	92617448	92809798	192351	-	92617664	92655659	400451	400451	FAM174B	NM_207446 NP_997329 XR_001751273 XR_931814 XR_931815	13
chr15	92803872	92850376	46505	*	10	10005	52197.3	TRUE	chr15	92883413	93027996	144584	+	92901238	93024705	1106	1106	CHD2	NM_001042572 NM_001271 NP_001036037 NP_001262	53
chr15	74597509	74635717	38209	*	5	5435	51229.3	TRUE	chr15	74608372	74645414	37043	+	74615836	74635127	1198	1198	CLK3	NM_001130028 NM_001292 NM_003992 NP_001123500 NP_003983	15
chr19	16304687	16394646	89960	*	9	9322	51035.8	TRUE	chr19	16324826	16328685	3860	+	16324924	16327031	10365	10365	KLF2	NM_006075 NM_016198 NM_016270 NP_057354	3
chr10	71672382	71774133	101752	*	12	10080	50788.3	TRUE	chr10	71711701	71737824	26124	-	71715936	71716337	414152	414152	C10orf105	NM_001164375 NM_001168390 NP_001157847 NP_001161862 XM_011539808 XM_011539809 XP_011538110 XP_011538111	3
chr10	71672382	71774133	101752	*	12	10080	50788.3	TRUE	chr10	71747556	71773520	25965	-	71751253	71773439	64115	64115	VSIR	NM_022153 NP_071436	8
chr11	73236817	73289938	53122	*	9	8527	50782.2	TRUE	chr11	73264498	73305103	40606	+	73295946	73297505	5031	5031	P2RY6	NM_001277204 NM_001277205 NM_001277206 NM_001277207 NM_001277208 NM_004154 NM_176796 NM_176797 NM_176798 NP_001264133 NP_001264134 NP_001264135 NP_001264136 NP_001264137 NP_789766 NP_789767 NP_789768 XM_005274022 XM_006718571 XM_011545076 XM_011545077 XM_011545079 XP_005274079 XP_006718634 XP_011543378 XP_011543379 XP_011543381	8
chr11	73236817	73289938	53122	*	9	8527	50782.2	TRUE	chr11	73308276	73369388	61113	+	73308639	73367780	9828	9828	ARHGEF17	NM_014786 NP_055601	22
chr4	190176621	190181680	5060	*	1	3216	49834.1	TRUE	chr4	190173774	190185942	12169	+	190173774	190175198	100288687	100288687	DUX4	NM_001205218 NM_001278056 NM_001293798 NM_001306068 NM_001363820 NP_001280727 NP_001292997 NP_001350749 NR_038191 NR_137167	6
chr2	201115871	201158600	42730	*	10	7054	49321.2	TRUE	chr2	201116154	201176687	60534	+	201129866	201163973	8837	8837	CFLAR	NM_001127183 NM_001127184 NM_001202515 NM_001202516 NM_001202517 NM_001202518 NM_001202519 NM_001308042 NM_001308043 NM_001351590 NM_001351591 NM_001351592 NM_001351593 NM_001351594 NM_003879 NP_001120655 NP_001120656 NP_001189444 NP_001189445 NP_001189446 NP_001189447 NP_001189448 NP_001294971 NP_001294972 NP_001338519 NP_001338520 NP_001338521 NP_001338522 NP_001338523 NP_003870 NR_147241 NR_14…	20
chr2	201115871	201158600	42730	*	10	7054	49321.2	TRUE	chr2	200973718	201071671	97954	-	200981270	201024009	285172	285172	FAM126B	NM_001321618 NM_001321619 NM_001321621 NM_001321622 NM_001321623 NM_001321624 NM_001321625 NM_001321626 NM_001321627 NM_001321628 NM_001321629 NM_173822 NP_001308547 NP_001308548 NP_001308550 NP_001308551 NP_001308552 NP_001308553 NP_001308554 NP_001308555 NP_001308556 NP_001308557 NP_001308558 NP_776183 XM_006712443 XM_011511002 XM_017003879 XM_017003880 XM_017003881 XM_017003882 XM_017003883 XP…	17
chr2	201115871	201158600	42730	*	10	7054	49321.2	TRUE	chr2	201182898	201229406	46509	+	201185778	201229083	843	843	CASP10	NM_001206524 NM_001206542 NM_001230 NM_001306083 NM_032974 NM_032976 NM_032977 NP_001193453 NP_001193471 NP_001221 NP_001293012 NP_116756 NP_116758 NP_116759 XM_005246907 XM_006712796 XM_011511990 XP_005246964 XP_006712859 XP_011510292 XR_923043 XR_923044	12
chr6	108557586	108652494	94909	*	18	10878	49257.3	TRUE	chr6	108559835	108684774	124940	+	108561209	108664855	2309	2309	FOXO3	NM_001455 NM_201559 NP_001446 NP_963853 XM_005266867 XM_005266868 XM_011535626 XM_011535628 XM_011535629 XM_017010585 XM_017010586 XP_005266924 XP_005266925 XP_011533928 XP_011533930 XP_011533931 XP_016866074 XP_016866075	5
chr15	68186684	68238588	51905	*	12	9353	48182.5	TRUE	chr15	68184032	68229718	45687	-	68194015	68229584	91860	91860	CALML4	NM_001031733 NM_001286694 NM_001286695 NM_033429 NP_001026903 NP_001273623 NP_001273624 NP_219501 NR_104583	10
chr15	68186684	68238588	51905	*	12	9353	48182.5	TRUE	chr15	68277745	68295862	18118	+	68278418	68291242	10116	10116	FEM1B	NM_015322 NP_056137	4
chr11	65417592	65455475	37884	*	10	5650	48028.1	TRUE	chr11	65375192	65383701	8510	-	65376407	65381951	283130	283130	SLC25A45	NM_001077241 NM_001278250 NM_001278251 NM_001300820 NM_001352381 NM_001352382 NM_001352383 NM_001352384 NM_182556 NP_001070709 NP_001265179 NP_001265180 NP_001287749 NP_001339310 NP_001339311 NP_001339312 NP_001339313 NP_872362 NR_147972 NR_147973	5
chr14	95462371	95553373	91003	*	15	11933	47908.3	TRUE	chr14	95533503	95544724	11222	+	95535090	95544125	51218	51218	GLRX5	NM_016417 NP_057501	3
chr14	95462371	95553373	91003	*	15	11933	47908.3	TRUE	chr14	95407266	95516650	109385	-	95417826	95475821	161176	161176	SYNE3	NM_001363692 NM_001384281 NM_001384282 NM_001384283 NM_001384284 NM_024633 NM_152592 NP_001350621 NP_001371210 NP_001371211 NP_001371212 NP_001371213 NP_689805 XM_006720063 XM_011536515 XP_006720126 XP_011534817	17
chr20	31661331	31724006	62676	*	11	8776	46802.8	TRUE	chr20	31739271	31801805	62535	+	31757477	31801080	22974	22974	TPX2	NM_012112 NP_036244 XM_011528697 XM_011528699 XM_011528700 XP_011526999 XP_011527001 XP_011527002	19
chr20	31661331	31724006	62676	*	11	8776	46802.8	TRUE	chr20	31664452	31723989	59538	-	31665949	31722218	598	598	BCL2L1	NM_001191 NM_001317919 NM_001317920 NM_001317921 NM_001322239 NM_001322240 NM_001322242 NM_138578 NP_001182 NP_001304848 NP_001304849 NP_001304850 NP_001309168 NP_001309169 NP_001309171 NP_612815 NR_134257 XM_011528964 XM_017027993 XP_011527266 XP_016883482 XR_001754364 XR_936599	7
chr10	104300421	104353802	53382	*	10	8450	46439.1	TRUE	chr10	104353833	104455102	101270	+	104353898	104454530	159686	159686	CFAP58	NM_001008723 NM_001400226 NM_001400227 NP_001008723 NP_001387155 NP_001387156	19
chr10	104300421	104353802	53382	*	10	8450	46439.1	TRUE	chr10	104309698	104338465	28768	-	104314408	104316051	85450	85450	ITPRIP	NM_001272012 NM_001272013 NM_033397 NP_001258941 NP_001258942 NP_203755 XM_005270257 XP_005270314	6
chr22	28741378	28837598	96221	*	12	11202	45936.7	TRUE	chr22	28742039	28757515	15477	+	28742096	28757169	150274	150274	HSCB	NM_001318314 NM_001318315 NM_001318316 NM_001363856 NM_172002 NP_001305243 NP_001305244 NP_001305245 NP_001350785 NP_741999 NR_134560 XM_005261359 XM_017028619 XM_017028620 XP_005261416 XP_016884108 XP_016884109 XR_002958669	8
chr22	28741378	28837598	96221	*	12	11202	45936.7	TRUE	chr22	28772674	28789301	16628	+	28772850	28786326	150275	150275	CCDC117	NM_001284263 NM_001284264 NM_001284265 NM_173510 NP_001271192 NP_001271193 NP_001271194 NP_775781	6
chr22	28741378	28837598	96221	*	12	11202	45936.7	TRUE	chr22	28687743	28742422	54680	-	28687897	28734721	11200	11200	CHEK2	NM_001005735 NM_001257387 NM_001349956 NM_007194 NM_145862 NP_001005735 NP_001244316 NP_001336885 NP_009125 NP_665861 XM_006724114 XM_006724116 XM_011529839 XM_011529840 XM_011529841 XM_011529842 XM_011529844 XM_011529845 XM_017028560 XM_017028561 XM_024452148 XM_024452149 XP_006724177 XP_006724179 XP_011528141 XP_011528142 XP_011528143 XP_011528144 XP_011528146 XP_011528147 XP_016884049 XP_01688…	25
chr22	28741378	28837598	96221	*	12	11202	45936.7	TRUE	chr22	28794555	28800597	6043	-	28795175	28800524	7494	7494	XBP1	NM_001079539 NM_001393999 NM_001394000 NM_005080 NP_001073007 NP_001380928 NP_001380929 NP_005071	6
chr22	28741378	28837598	96221	*	12	11202	45936.7	TRUE	chr22	28883572	29057488	173917	+	28883767	29053622	84133	84133	ZNRF3	NM_001206998 NM_032173 NP_001193927 NP_115549	10
chr15	78034187	78088579	54393	*	10	8459	45863.3	TRUE	chr15	78077808	78104370	26563	+	78092585	78103515	646892	646892	SH2D7	NM_001101404 NP_001094874 XM_011521895 XM_011521896 XM_011521899 XM_017022487 XM_017022488 XP_011520197 XP_011520198 XP_011520201 XP_016877976 XP_016877977	7
chr15	78034187	78088579	54393	*	10	8459	45863.3	TRUE	chr15	77984036	78077724	93689	-	77984215	78077652	23102	23102	TBC1D2B	NM_001387142 NM_001387143 NM_001387144 NM_001387145 NM_001387146 NM_001387147 NM_001387148 NM_001387149 NM_015079 NM_144572 NP_001374071 NP_001374072 NP_001374073 NP_001374074 NP_001374075 NP_001374076 NP_001374077 NP_001374078 NP_055894 NP_653173 XM_011521387 XM_017022022 XP_011519689 XP_016877511 XR_001751162 XR_001751163	17
chr15	78034187	78088579	54393	*	10	8459	45863.3	TRUE	chr15	78131498	78171945	40448	+	78149404	78169005	3419	3419	IDH3A	NM_005530 NP_005521 XM_005254336 XM_024449911 XM_024449912 XP_005254393 XP_024305679 XP_024305680	16
chr8	27304506	27466087	161582	*	18	13231	45821	TRUE	chr8	27235308	27258420	23113	-	27236846	27243723	81551	81551	STMN4	NM_001283053 NM_001283054 NM_001283055 NM_001394383 NM_001394384 NM_001394385 NM_001394386 NM_001394387 NM_001394388 NM_030795 NP_001269982 NP_001269983 NP_001269984 NP_001381312 NP_001381313 NP_001381314 NP_001381315 NP_001381316 NP_001381317 NP_110422 XM_005273652 XP_005273709 XR_002956647	8
chr8	27304506	27466087	161582	*	18	13231	45821	TRUE	chr8	27311482	27459391	147910	+	27397585	27458509	2185	2185	PTK2B	NM_004103 NM_173174 NM_173175 NM_173176 NP_004094 NP_775266 NP_775267 NP_775268 XM_005273447 XM_005273448 XM_011544441 XM_011544442 XM_017013214 XM_017013215 XM_017013216 XP_005273504 XP_005273505 XP_011542743 XP_011542744 XP_016868703 XP_016868704 XP_016868705	39
chr8	27304506	27466087	161582	*	18	13231	45821	TRUE	chr8	27284886	27311272	26387	-	27286126	27311235	23087	23087	TRIM35	NM_001304495 NM_001362813 NM_171982 NP_001291424 NP_001349742 NP_741983 XM_011544453 XP_011542755	6
chr8	27304506	27466087	161582	*	18	13231	45821	TRUE	chr8	27490781	27545564	54784	+	27491209	27544522	2053	2053	EPHX2	NM_001256482 NM_001256483 NM_001256484 NM_001979 NP_001243411 NP_001243412 NP_001243413 NP_001970 XM_017013199 XM_017013200 XP_016868688 XP_016868689 XR_001745491	21
chr5	95899800	95962469	62670	*	9	8075	45302.9	TRUE	chr5	95885098	95961851	76754	-	95888871	95961721	22936	22936	ELL2	NM_012081 NP_036213 XM_006714575 XM_017009239 XM_017009240 XM_017009241 XM_017009242 XM_017009243 XP_006714638 XP_016864728 XP_016864729 XP_016864730 XP_016864731 XP_016864732	13
chr10	72247682	72355201	107520	*	13	14301	44442.4	TRUE	chr10	72096032	72217134	121103	-	72097334	72213298	51008	51008	ASCC1	NM_001198798 NM_001198799 NM_001198800 NM_001369085 NM_001369086 NM_001369087 NM_001369088 NM_001369089 NM_001369090 NM_001369091 NM_001369092 NM_001369093 NM_001369094 NM_001369095 NM_001369096 NM_001369097 NM_001369098 NM_001369099 NM_001369100 NM_001369101 NM_001369102 NM_001369103 NM_001369104 NM_001369105 NM_001369106 NM_001369107 NM_001369108 NM_001369109 NM_001369110 NM_001369111 NM_001369…	21
chr10	72247682	72355201	107520	*	13	14301	44442.4	TRUE	chr10	72273919	72276036	2118	+	72274217	72275188	54541	54541	DDIT4	NM_019058 NP_061931	1
chr10	72247682	72355201	107520	*	13	14301	44442.4	TRUE	chr10	72332830	72355149	22320	-	72334588	72354999	54788	54788	DNAJB12	NM_001002762 NM_001365080 NM_001365081 NM_017626 NP_001002762 NP_001352009 NP_001352010 NP_060096 NR_157570	9
chr17	78681798	78792564	110767	*	18	12205	44421.5	TRUE	chr17	78674048	78782297	108250	-	78675938	78782223	9267	9267	CYTH1	NM_001292018 NM_001292019 NM_001365037 NM_001365038 NM_001365039 NM_001365040 NM_001365041 NM_001394676 NM_001394677 NM_001394678 NM_004762 NM_017456 NP_001278947 NP_001278948 NP_001351966 NP_001351967 NP_001351968 NP_001351969 NP_001351970 NP_001381605 NP_001381606 NP_001381607 NP_004753 NP_059430 XM_011525475 XM_011525476 XM_011525477 XM_011525478 XM_024451030 XP_011523777 XP_011523778 XP_01152…	20
chr5	56791482	56852947	61466	*	12	8706	43935.2	TRUE	chr5	56815549	56896152	80604	+	56815574	56893680	4214	4214	MAP3K1	NM_005921 NP_005912 XM_017009484 XM_017009485 XP_016864973 XP_016864974 XR_001742068	19
chr5	173884143	173937158	53016	*	9	5614	43451.1	TRUE	chr5	173888349	173961980	73632	+	173889734	173956137	80315	80315	CPEB4	NM_001308189 NM_001308191 NM_001308192 NM_001308193 NM_030627 NP_001295118 NP_001295120 NP_001295121 NP_001295122 NP_085130 XM_005265994 XM_011534660 XM_011534661 XP_005266051 XP_011532962 XP_011532963	13
chr5	173884143	173937158	53016	*	9	5614	43451.1	TRUE	chr5	173973779	174006140	32362	+	173989264	174001215	133491	133491	C5orf47	NM_001144954 NP_001138426 XM_011534431 XM_017009028 XP_011532733 XP_016864517	7
chr7	7959988	7990404	30417	*	5	4218	42561.1	TRUE	chr7	7968796	8094272	125477	+	7969351	8092694	113263	113263	GLCCI1	NM_138426 NP_612435	14
chr17	64048875	64132160	83286	*	15	10585	42415	TRUE	chr17	64002594	64020634	18041	-	64002747	64006691	3384	3384	ICAM2	NM_000873 NM_001099786 NM_001099787 NM_001099788 NM_001099789 NP_000864 NP_001093256 NP_001093257 NP_001093258 NP_001093259	7
chr17	64048875	64132160	83286	*	15	10585	42415	TRUE	chr17	64039080	64130144	91065	-	64043988	64130029	2081	2081	ERN1	NM_001433 NM_152461 NP_001424 XM_017024347 XM_017024348 XP_016879836 XP_016879837	22
chr17	77083491	77164251	80761	*	12	7877	42269.8	TRUE	chr17	77088749	77217101	128353	+	77143597	77216564	6397	6397	SEC14L1	NM_001039573 NM_001143998 NM_001143999 NM_001144001 NM_001204408 NM_001204410 NM_003003 NP_001034662 NP_001137470 NP_001137471 NP_001137473 NP_001191337 NP_001191339 NP_002994	27
chr5	139371070	139415747	44678	*	8	6867	42094.7	TRUE	chr5	139367196	139384553	17358	-	139372006	139384553	9963	9963	SLC23A1	NM_005847 NM_152685 NP_005838 NP_689898 XM_005272148 XM_005272149 XM_006714741 XM_011543765 XM_011543766 XM_011543767 XM_011543768 XM_011543769 XP_005272205 XP_005272206 XP_006714804 XP_011542067 XP_011542068 XP_011542069 XP_011542070 XP_011542071	14
chr5	139371070	139415747	44678	*	8	6867	42094.7	TRUE	chr5	139387467	139390081	2615	-	139387765	139389856	51237	51237	MZB1	NM_016459 NP_057543	2
chr5	139371070	139415747	44678	*	8	6867	42094.7	TRUE	chr5	139390592	139395104	4513	-	139392034	139395081	389333	389333	PROB1	NM_001161546 NP_001155018	1
chr5	139371070	139415747	44678	*	8	6867	42094.7	TRUE	chr5	139396563	139404089	7527	-	139396563	139404060	202051	202051	SPATA24	NM_194296 NP_919272 XM_005271916 XM_011543252 XM_011543253 XM_011543254 XP_005271973 XP_011541554 XP_011541555 XP_011541556	6
chr3	98709924	98807587	97664	*	12	11154	42042.3	TRUE	chr3	98732236	98820997	88762	+	98768441	98793761	10402	10402	ST3GAL6	NM_001271142 NM_001271145 NM_001271146 NM_001271147 NM_001271148 NM_001323352 NM_001323353 NM_001323358 NM_001323359 NM_001323360 NM_001323362 NM_001323363 NM_001323364 NM_001323365 NM_001323366 NM_001323367 NM_001323368 NM_006100 NP_001258071 NP_001258074 NP_001258075 NP_001258076 NP_001258077 NP_001310281 NP_001310282 NP_001310287 NP_001310288 NP_001310289 NP_001310291 NP_001310292 NP_001310293…	24
chr1	156475816	156509257	33442	*	7	4638	41121.3	TRUE	chr1	156463727	156500779	37053	-	156467645	156483292	4209	4209	MEF2D	NM_001271629 NM_005920 NP_001258558 NP_005911 XM_005245169 XM_005245170 XM_006711330 XM_006711332 XM_006711333 XM_006711334 XM_011509569 XM_017001314 XM_017001315 XP_005245226 XP_005245227 XP_006711393 XP_006711395 XP_006711396 XP_006711397 XP_011507871 XP_016856803 XP_016856804 XR_001737184	15
chr2	16608824	16666577	57754	*	11	8091	40313.6	TRUE	chr2	16549459	16666331	116873	-	16552936	16588119	81553	81553	CYRIA	NM_030797 NP_110424 XM_005262630 XM_006712108 XM_024453163 XM_024453164 XM_024453165 XM_024453166 XP_005262687 XP_006712171 XP_024308931 XP_024308932 XP_024308933 XP_024308934	16
chr3	32391503	32468048	76546	*	12	10485	39895.3	TRUE	chr3	32391698	32483067	91370	+	32391907	32454531	112616	112616	CMTM7	NM_138410 NM_181472 NP_612419 NP_852137 XM_011533319 XM_017005646 XP_011531621 XP_016861135	6
chr14	103090689	103141312	50624	*	8	8348	39642.9	TRUE	chr14	103094725	103110559	15835	+	103100220	103110539	91828	91828	EXOC3L4	NM_001077594 NM_001394941 NM_001394942 NP_001071062 NP_001381870 NP_001381871 XM_011537323 XM_011537324 XM_011537329 XM_011537330 XM_011537331 XM_011537332 XM_011537333 XM_011537334 XP_011535625 XP_011535626 XP_011535631 XP_011535632 XP_011535633 XP_011535634 XP_011535635 XP_011535636 XR_943558	11
chr14	103090689	103141312	50624	*	8	8348	39642.9	TRUE	chr14	102932380	103057549	125170	-	102933712	103057173	9578	9578	CDC42BPB	NM_006035 NP_006026 XM_005268227 XM_005268228 XM_005268229 XM_005268230 XM_011537387 XP_005268284 XP_005268285 XP_005268286 XP_005268287 XP_011535689 XR_943564	38
chr14	103090689	103141312	50624	*	8	8348	39642.9	TRUE	chr14	103121476	103137439	15964	+	103126458	103136003	7127	7127	TNFAIP2	NM_001371220 NM_001371221 NM_006291 NP_001358149 NP_001358150 NP_006282 XM_006720243 XM_011537112 XM_011537113 XM_011537114 XM_011537115 XM_017021616 XP_006720306 XP_011535414 XP_011535415 XP_011535416 XP_011535417 XP_016877105	13
chr5	180788953	180833453	44501	*	6	6922	39547.9	TRUE	chr5	180739123	180740058	936	-	180739123	180740058	134083	134083	OR2Y1	NM_001001657 NP_001001657	1
chr5	180788953	180833453	44501	*	6	6922	39547.9	TRUE	chr5	180784780	180815652	30873	-	180791634	180792971	4245	4245	MGAT1	NM_001114617 NM_001114618 NM_001114619 NM_001114620 NM_001364377 NM_001364379 NM_001364380 NM_001364381 NM_001364382 NM_001364383 NM_001364384 NM_001364385 NM_001364386 NM_001364387 NM_001364388 NM_001364389 NM_001364390 NM_001364391 NM_001364392 NM_001364393 NM_001364394 NM_001364395 NM_002406 NP_001108089 NP_001108090 NP_001108091 NP_001108092 NP_001351306 NP_001351308 NP_001351309 NP_001351310…	11
chr5	1313116	1343415	30300	*	8	6356	39169.4	TRUE	chr5	1253147	1295068	41922	-	1253728	1294989	7015	7015	TERT	NM_001193376 NM_198253 NM_198254 NM_198255 NP_001180305 NP_937983 NR_149162 NR_149163	18
chr11	72812810	72831945	19136	*	5	5620	38942.9	TRUE	chr11	72814406	72843674	29269	+	72814432	72829390	89849	89849	ATG16L2	NM_001318766 NM_033388 NP_001305695 NP_203746 XM_005274376 XM_006718732 XM_006718733 XM_006718734 XM_011545332 XM_011545333 XM_011545334 XP_005274433 XP_006718795 XP_006718796 XP_006718797 XP_011543634 XP_011543635 XP_011543636 XR_001748024 XR_950094	15
chr11	72812810	72831945	19136	*	5	5620	38942.9	TRUE	chr11	72685069	72793599	108531	-	72685644	72727128	116985	116985	ARAP1	NM_001040118 NM_001135190 NM_001369489 NM_015242 NP_001035207 NP_001128662 NP_001356418 NP_056057 NR_161388	38
chr11	72812810	72831945	19136	*	5	5620	38942.9	TRUE	chr11	72754729	72794047	39319	-	72754729	72781181	10809	10809	STARD10	NM_006645 NP_006636	14
chr14	73741698	73797791	56094	*	10	9041	38720.7	TRUE	chr14	73711783	73714384	2602	-	73712578	73713639	9240	9240	PNMA1	NM_006029 NP_006020	1
chr14	73741698	73797791	56094	*	10	9041	38720.7	TRUE	chr14	73715122	73790285	75164	-	73718843	73740008	91748	91748	MIDEAS	NM_001043318 NM_001367710 NM_001394972 NM_194278 NP_001036783 NP_001354639 NP_001381901 NP_919254 XM_005268206 XP_005268263	16
chr12	122860694	122902184	41491	*	12	8249	38257.9	TRUE	chr12	122865330	122896127	30798	-	122867116	122896062	79720	79720	VPS37B	NM_024667 NP_078943 XM_005253622 XM_006719602 XM_011538743 XM_011538745 XM_017019970 XM_017019971 XM_017019972 XP_005253679 XP_006719665 XP_011537045 XP_011537047 XP_016875459 XP_016875460 XP_016875461	6
chr7	139696496	139748440	51945	*	8	7356	38169	TRUE	chr7	139777051	140020325	243275	+	139829388	140020099	6916	6916	TBXAS1	NM_001061 NM_001130966 NM_001166253 NM_001166254 NM_001314028 NM_001366537 NM_001366538 NM_030984 NP_001052 NP_001124438 NP_001159725 NP_001159726 NP_001300957 NP_001353466 NP_001353467 NP_112246 NR_159363 NR_159364 NR_159365 XM_011516544 XM_017012570 XM_017012571 XM_017012572 XM_024446901 XP_011514846 XP_016868059 XP_016868060 XP_016868061 XP_024302669	26
chr5	151196106	151258104	61999	*	12	9032	37734.6	TRUE	chr5	151100706	151157785	57080	-	151100889	151147901	309	309	ANXA6	NM_001155 NM_001193544 NM_001363114 NM_004033 NP_001146 NP_001180473 NP_001350043	29
chr5	151196106	151258104	61999	*	12	9032	37734.6	TRUE	chr5	151212150	151270440	58291	+	151212764	151267451	2760	2760	GM2A	NM_000405 NM_001167607 NP_000396 NP_001161079	6
chr5	151196106	151258104	61999	*	12	9032	37734.6	TRUE	chr5	151181052	151224093	43042	-	151183437	151223970	26112	26112	CCDC69	NM_015621 NP_056436	11
chr11	65857044	65928344	71301	*	10	10512	37729.4	TRUE	chr11	65857126	65867653	10528	+	65857424	65866052	80198	80198	MUS81	NM_001350283 NM_025128 NP_001337212 NP_079404 NR_146598 XM_011545269 XM_011545270 XP_011543571 XP_011543572 XR_001747984 XR_001747985 XR_001747986 XR_247212 XR_950067	11
chr11	65857044	65928344	71301	*	10	10512	37729.4	TRUE	chr11	65879809	65883741	3933	+	65879855	65883618	1521	1521	CTSW	NM_001335 NP_001326	9
chr11	65857044	65928344	71301	*	10	10512	37729.4	TRUE	chr11	65890673	65891635	963	+	65890784	65891392	11007	11007	CCDC85B	NM_006848 NP_006839	1
chr11	65857044	65928344	71301	*	10	10512	37729.4	TRUE	chr11	65823022	65862026	39005	-	65855336	65861373	1072	1072	CFL1	NM_005507 NP_005498	11
chr11	65857044	65928344	71301	*	10	10512	37729.4	TRUE	chr11	65866441	65873592	7152	-	65866572	65872354	30008	30008	EFEMP2	NM_016938 NP_058634 NR_037718	8
chr11	65857044	65928344	71301	*	10	10512	37729.4	TRUE	chr11	65919274	65921563	2290	+	65919502	65921435	10589	10589	DRAP1	NM_006442 NP_006433	5
chr11	65857044	65928344	71301	*	10	10512	37729.4	TRUE	chr11	65883740	65888531	4792	-	65883974	65888418	9158	9158	FIBP	NM_004214 NM_198897 NP_004205 NP_942600 XM_024448763 XP_024304531 XR_001748030 XR_950100	8
chr11	65857044	65928344	71301	*	10	10512	37729.4	TRUE	chr11	65945445	65959963	14519	+	65945676	65959940	254187	254187	TSGA10IP	NM_001395491 NM_001395492 NM_001395493 NM_001395494 NM_001395495 NM_152762 NP_001382420 NP_001382421 NP_001382422 NP_001382423 NP_001382424 NP_689975 NR_172563 XM_011544888 XP_011543190 XR_949858	7
chr11	65857044	65928344	71301	*	10	10512	37729.4	TRUE	chr11	65892049	65900573	8525	-	65892886	65900339	8061	8061	FOSL1	NM_001300844 NM_001300855 NM_001300856 NM_001300857 NM_005438 NP_001287773 NP_001287784 NP_001287785 NP_001287786 NP_005429 NR_125339	4
chr11	65857044	65928344	71301	*	10	10512	37729.4	TRUE	chr11	65961728	65980137	18410	+	65961781	65979030	9092	9092	SART1	NM_005146 NP_005137 XM_011545344 XM_011545345 XP_011543646 XP_011543647 XR_950099	19
chr11	65857044	65928344	71301	*	10	10512	37729.4	TRUE	chr11	65916810	65919062	2253	-	65917459	65919031	83638	83638	C11orf68	NM_001135635 NM_031450 NP_001129107 NP_113638	2
chr1	228059863	228152136	92274	*	10	8025	37610.6	TRUE	chr1	228082660	228099212	16553	+	228097115	228098013	375	375	ARF1	NM_001024226 NM_001024227 NM_001024228 NM_001658 NP_001019397 NP_001019398 NP_001019399 NP_001649 XM_017001233 XP_016856722	8
chr1	228059863	228152136	92274	*	10	8025	37610.6	TRUE	chr1	228139962	228148984	9023	+	228140303	228148852	2987	2987	GUK1	NM_000858 NM_001159390 NM_001159391 NM_001242839 NM_001242840 NP_000849 NP_001152862 NP_001152863 NP_001229768 NP_001229769 XM_005273104 XP_005273161	7
chr1	228059863	228152136	92274	*	10	8025	37610.6	TRUE	chr1	228149930	228159826	9897	+	228157759	228159078	57165	57165	GJC2	NM_020435 NP_065168	2
chr1	228059863	228152136	92274	*	10	8025	37610.6	TRUE	chr1	228100726	228105411	4686	-	228101131	228103227	79169	79169	C1orf35	NM_024319 NP_077295 NR_130975	4
chr1	228059863	228152136	92274	*	10	8025	37610.6	TRUE	chr1	228106679	228109312	2634	-	228106760	228108260	128308	128308	MRPL55	NM_001321284 NM_181441 NM_181454 NM_181455 NM_181456 NM_181462 NM_181463 NM_181464 NM_181465 NP_001308213 NP_852106 NP_852119 NP_852120 NP_852121 NP_852127 NP_852128 NP_852129 NP_852130 XM_005273059 XM_005273061 XM_005273062 XM_005273063 XM_011544095 XM_024453282 XP_005273116 XP_005273118 XP_005273119 XP_005273120 XP_011542397 XP_024309050 XR_002959480 XR_002959481 XR_002959482	2
chr1	228059863	228152136	92274	*	10	8025	37610.6	TRUE	chr1	228165804	228182257	16454	+	228165817	228175513	200205	200205	IBA57	NM_001010867 NM_001310327 NP_001010867 NP_001297256	5
chr17	16909094	17002572	93479	*	10	7469	37525.5	TRUE	chr17	16929816	16972118	42303	-	16933065	16972075	23495	23495	TNFRSF13B	NM_012452 NP_036584	11
chr17	16909094	17002572	93479	*	10	7469	37525.5	TRUE	chr17	17042457	17217679	175223	+	17042849	17201616	23164	23164	MPRIP	NM_001364716 NM_015134 NM_201274 NP_001351645 NP_055949 NP_958431 XM_005256563 XM_005256564 XM_011523762 XM_011523763 XM_011523764 XM_011523765 XM_011523766 XM_011523767 XM_017024393 XP_005256620 XP_005256621 XP_011522064 XP_011522065 XP_011522066 XP_011522067 XP_011522068 XP_011522069 XP_016879882	31
chr4	140622659	140757221	134563	*	14	10604	37221.4	TRUE	chr4	140620782	140756385	135604	-	140622195	140756045	23158	23158	TBC1D9	NM_015130 NP_055945	21
chr14	69611713	69654430	42718	*	9	6269	37202.2	TRUE	chr14	69611596	69715144	103549	+	69658593	69710979	9766	9766	SUSD6	NM_014734 NP_055549	7
chr14	69611713	69654430	42718	*	9	6269	37202.2	TRUE	chr14	69569799	69574871	5073	-	69571499	69573622	56936	56936	CCDC177	NM_001271507 NM_020181 NP_001258436 NR_024630	2
chr19	12784495	12802188	17694	*	3	4705	36865.1	TRUE	chr19	12802063	12813640	11578	+	12802072	12813466	10535	10535	RNASEH2A	NM_006397 NP_006388	7
chr19	12784495	12802188	17694	*	3	4705	36865.1	TRUE	chr19	12802031	12806790	4760	+	12802072	12804303	111644133	111644133	THSD8	NM_001386800 NP_001373729	3
chr19	12784495	12802188	17694	*	3	4705	36865.1	TRUE	chr19	12833951	12874952	41002	+	12833968	12874870	22983	22983	MAST1	NM_014975 NP_055790	27
chr19	12784495	12802188	17694	*	3	4705	36865.1	TRUE	chr19	12763003	12792582	29580	-	12763282	12775449	29911	29911	HOOK2	NM_001100176 NM_001400041 NM_001400043 NM_001400044 NM_001400045 NM_001400046 NM_001400047 NM_001400048 NM_013312 NP_001093646 NP_001386970 NP_001386972 NP_001386973 NP_001386974 NP_001386975 NP_001386976 NP_001386977 NP_037444	20
chr19	12784495	12802188	17694	*	3	4705	36865.1	TRUE	chr19	12791486	12793315	1830	+	12791772	12792815	3726	3726	JUNB	NM_002229 NP_002220	1
chr19	12784495	12802188	17694	*	3	4705	36865.1	TRUE	chr19	12796820	12801800	4981	-	12797081	12801261	7001	7001	PRDX2	NM_005809 NM_181737 NM_181738 NP_005800	4
chr19	12784495	12802188	17694	*	3	4705	36865.1	TRUE	chr19	12730640	12734684	4045	-	12730961	12734657	79002	79002	TRIR	NM_001329738 NM_001329739 NM_024038 NP_001316667 NP_001316668 NP_076943 NR_138095	3
chr20	57657287	57719121	61835	*	11	8548	36845.7	TRUE	chr20	57603846	57620576	16731	-	57604573	57620295	81030	81030	ZBP1	NM_001160417 NM_001160418 NM_001160419 NM_001323966 NM_030776 NP_001153889 NP_001153890 NP_001153891 NP_001310895 NP_110403 NR_136660 XM_011529057 XM_011529058 XM_017028086 XP_011527359 XP_011527360 XP_016883575 XR_001754408 XR_001754409 XR_001754410 XR_001754412 XR_001754413 XR_001754414 XR_001754415 XR_936634	9
chr20	57657287	57719121	61835	*	11	8548	36845.7	TRUE	chr20	57648392	57711536	63145	-	57652053	57710463	56937	56937	PMEPA1	NM_001255976 NM_020182 NM_199169 NM_199170 NM_199171 NP_001242905 NP_064567 NP_954638 NP_954639 NP_954640	9
chr8	60894578	60979290	84713	*	15	10546	36815.8	TRUE	chr8	60910053	61501645	591593	+	61299828	61499542	157807	157807	CLVS1	NM_173519 NP_775790 XM_017013141 XM_017013142 XM_024447079 XP_016868630 XP_016868631 XP_024302847	18
chr6	119312678	119380957	68280	*	10	6912	36806	TRUE	chr6	119177205	119349761	172557	-	119179819	119349065	4121	4121	MAN1A1	NM_005907 NP_005898 XM_005266986 XM_011535833 XM_011535834 XP_005267043 XP_011534135 XP_011534136 XR_001743420	13
chr3	183506446	183556159	49714	*	9	7858	36673.2	TRUE	chr3	183487551	183555706	68156	-	183491927	183555653	89857	89857	KLHL6	NM_130446 NP_569713 XM_011513273 XM_011513274 XP_011511575 XP_011511576 XR_924209	8
chr15	44726316	44751034	24719	*	5	4006	36580.2	TRUE	chr15	44665732	44711323	45592	-	44665789	44676490	197135	197135	PATL2	NM_001145112 NM_001330283 NM_001387260 NM_001387261 NM_001387262 NM_001387263 NM_001387264 NP_001138584 NP_001317212 NP_001374189 NP_001374190 NP_001374191 NP_001374192 NP_001374193 XM_011521336 XM_011521337 XM_011521338 XM_011521339 XM_011521340 XM_011521341 XM_011521342 XM_011521343 XM_011521344 XM_011521345 XM_011521346 XM_011521347 XM_017022001 XP_011519638 XP_011519639 XP_011519640 XP_011519…	19
chr22	50525216	50549348	24133	*	5	7085	36352.4	TRUE	chr22	50443219	50483923	40705	-	50447142	50474840	6305	6305	SBF1	NM_001365819 NM_002972 NP_001352748 NP_002963 XM_005261935 XM_011530709 XM_011530710 XM_017028905 XP_005261992 XP_011529011 XP_011529012 XP_016884394	21
chr22	50525216	50549348	24133	*	5	7085	36352.4	TRUE	chr22	50545899	50551023	5125	+	50546244	50549951	113730	113730	KLHDC7B	NM_138433 NP_612442	1
chr22	50525216	50549348	24133	*	5	7085	36352.4	TRUE	chr22	50502949	50507702	4754	-	50503391	50507675	91289	91289	LMF2	NM_001363816 NM_033200 NP_001350745 NP_149977 XM_006724426 XM_006724427 XM_017029077 XP_006724489 XP_006724490 XP_016884566 XR_001755368 XR_938349	11
chr22	50525216	50549348	24133	*	5	7085	36352.4	TRUE	chr22	50523568	50526461	2894	-	50523611	50524411	9997	9997	SCO2	NM_001169109 NM_001169110 NM_001169111 NM_005138 NP_001162580 NP_001162581 NP_001162582 NP_005129	4
chr22	50525216	50549348	24133	*	5	7085	36352.4	TRUE	chr22	50525752	50530032	4281	-	50525770	50529709	1890	1890	TYMP	NM_001113755 NM_001113756 NM_001257988 NM_001257989 NM_001953 NP_001107227 NP_001107228 NP_001244917 NP_001244918 NP_001944	5
chr22	50525216	50549348	24133	*	5	7085	36352.4	TRUE	chr22	50529710	50532506	2797	-	50530442	50532077	440836	440836	ODF3B	NM_001014440 NM_001382807 NM_001382808 NP_001014440 NP_001369736 NP_001369737	4
chr8	94941452	94988578	47127	*	10	7643	36311.8	TRUE	chr8	94879770	94896678	16909	-	94881632	94894221	9134	9134	CCNE2	NM_004702 NM_057735 NM_057749 NP_477097 XM_011517366 XM_017013958 XM_017013959 XP_011515668 XP_016869447 XP_016869448	15
chr8	94941452	94988578	47127	*	10	7643	36311.8	TRUE	chr8	94925972	94949378	23407	-	94930479	94940941	94241	94241	TP53INP1	NM_001135733 NM_033285 NP_001129205 NP_150601 XM_011517386 XP_011515688	5
chr22	37184995	37245900	60906	*	13	7419	36199.1	TRUE	chr22	37125843	37175054	49212	-	37128096	37144172	3560	3560	IL2RB	NM_000878 NM_001346222 NM_001346223 NP_000869 NP_001333151 NP_001333152	12
chr22	37184995	37245900	60906	*	13	7419	36199.1	TRUE	chr22	37180166	37199385	19220	-	37182188	37188213	114904	114904	C1QTNF6	NM_001365878 NM_031910 NM_182486 NP_001352807 NP_114116 NP_872292 XM_011529857 XM_017028569 XM_024452150 XM_024452151 XM_024452152 XM_024452153 XM_024452154 XM_024452155 XP_011528159 XP_016884058 XP_024307918 XP_024307919 XP_024307920 XP_024307921 XP_024307922 XP_024307923	9
chr22	37184995	37245900	60906	*	13	7419	36199.1	TRUE	chr22	37204237	37212477	8241	-	37206547	37207803	6753	6753	SSTR3	NM_001051 NM_001278687 NP_001042 NP_001265616 XM_005261721 XM_006724311 XM_011530349 XM_017028923 XM_017028924 XP_005261778 XP_006724374 XP_011528651 XP_016884412 XP_016884413	3
chr22	37184995	37245900	60906	*	13	7419	36199.1	TRUE	chr22	37282027	37315341	33315	+	37282570	37313511	27128	27128	CYTH4	NM_001318024 NM_013385 NP_001304953 NP_037517	17
chr22	37184995	37245900	60906	*	13	7419	36199.1	TRUE	chr22	37225270	37244448	19179	-	37226673	37244148	5880	5880	RAC2	NM_002872 NP_002863 XM_006724286 XP_006724349	8
chr15	92881829	92905499	23671	*	4	4144	36158.3	TRUE	chr15	92883413	93027996	144584	+	92901238	93024705	1106	1106	CHD2	NM_001042572 NM_001271 NP_001036037 NP_001262	53
chr19	42267982	42296502	28521	*	6	4119	36015.1	TRUE	chr19	42198598	42232149	33552	-	42199438	42232149	162989	162989	DEDD2	NM_001270614 NM_001270615 NM_133328 NP_001257543 NP_001257544 NP_579874 NR_073046 NR_073047 NR_073048 NR_073049 NR_073050 NR_073051 NR_073052 XM_011526569 XM_011526571 XM_011526572 XM_017026402 XM_017026403 XM_024451400 XP_011524871 XP_011524873 XP_011524874 XP_016881891 XP_016881892 XP_024307168 XR_935758	10
chr19	42267982	42296502	28521	*	6	4119	36015.1	TRUE	chr19	42325609	42378769	53161	+	42326244	42378750	1954	1954	MEGF8	NM_001271938 NM_001410 NM_178121 NP_001258867 NP_001401	42
chr19	42267982	42296502	28521	*	6	4119	36015.1	TRUE	chr19	42247569	42255128	7560	-	42248465	42254999	2077	2077	ERF	NM_001301035 NM_001308402 NM_001312656 NM_006494 NP_001287964 NP_001295331 NP_001299585 NP_006485 XM_017026468 XM_017026469 XP_016881957 XP_016881958	6
chr19	42267982	42296502	28521	*	6	4119	36015.1	TRUE	chr19	42268537	42295797	27261	+	42271784	42295191	23152	23152	CIC	NM_001304815 NM_001379480 NM_001379482 NM_001379484 NM_001379485 NM_001386298 NM_015125 NP_001291744 NP_001366409 NP_001366411 NP_001366413 NP_001366414 NP_001373227 NP_055940 XM_005258673 XM_005258674 XM_005258675 XM_011526662 XM_011526664 XM_011526665 XM_011526666 XM_011526667 XM_024451432 XM_024451433 XP_005258730 XP_005258731 XP_005258732 XP_011524964 XP_011524966 XP_011524967 XP_011524968 XP…	24
chr19	42267982	42296502	28521	*	6	4119	36015.1	TRUE	chr19	42302098	42310814	8717	+	42309585	42310740	284338	284338	PRR19	NM_199285 NP_954979 XM_005258779 XM_005258780 XM_006723154 XM_011526787 XM_011526788 XM_011526789 XM_011526790 XP_005258836 XP_005258837 XP_006723217 XP_011525089 XP_011525090 XP_011525091 XP_011525092	3
chr19	42267982	42296502	28521	*	6	4119	36015.1	TRUE	chr19	42313309	42325064	11756	+	42313377	42324817	284339	284339	TMEM145	NM_001366910 NM_173633 NP_001353839 NP_775904 XM_011526791 XM_011526792 XP_011525093 XP_011525094	15
chr19	42267982	42296502	28521	*	6	4119	36015.1	TRUE	chr19	42226225	42255132	28908	-	42226225	42254999	2931	2931	GSK3A	NM_019884 NP_063937 XR_001753673	21
chr19	39397434	39412732	15299	*	6	4801	35820.4	TRUE	chr19	39385629	39391154	5526	-	39385915	39390864	54623	54623	PAF1	NM_001256826 NM_019088 NP_001243755 NP_061961 NR_046384	11
chr19	39397434	39412732	15299	*	6	4801	35820.4	TRUE	chr19	39412669	39428415	15747	+	39414087	39425379	64857	64857	PLEKHG2	NM_001351693 NM_001351694 NM_022835 NP_001338622 NP_001338623 NP_073746 XM_005259163 XM_006723334 XM_011527232 XM_017027150 XM_017027151 XP_005259220 XP_006723397 XP_011525534 XP_016882639 XP_016882640 XR_002958344	20
chr19	39397434	39412732	15299	*	6	4801	35820.4	TRUE	chr19	39436156	39476670	40515	+	39445891	39476399	6829	6829	SUPT5H	NM_001111020 NM_001130824 NM_001130825 NM_001319990 NM_001319991 NM_003169 NP_001104490 NP_001124296 NP_001124297 NP_001306919 NP_001306920 NP_003160 XM_017027174 XP_016882663	34
chr19	39397434	39412732	15299	*	6	4801	35820.4	TRUE	chr19	39406847	39409412	2566	+	39406887	39408699	7538	7538	ZFP36	NM_003407 NP_003398	3
chr3	45593300	45665248	71949	*	20	12769	35742.7	TRUE	chr3	45689056	45745409	56354	+	45689466	45743735	22908	22908	SACM1L	NM_001319071 NM_001319072 NM_001319073 NM_014016 NP_001306000 NP_001306001 NP_001306002 NP_054735 XM_011533500 XP_011531802 XR_940392	21
chr19	55599024	55655591	56568	*	9	7160	35722.1	TRUE	chr19	55605647	55617269	11623	+	55613619	55616798	100507290	100507290	ZNF865	NM_001195605 NP_001182534	2
chr19	55599024	55655591	56568	*	9	7160	35722.1	TRUE	chr19	55635016	55642818	7803	+	55642509	55642818	107983998	107983998	LOC107983998	NR_171682 NR_171683	2
chr19	55599024	55655591	56568	*	9	7160	35722.1	TRUE	chr19	55654146	55674716	20571	+	55655105	55674068	11338	11338	U2AF2	NM_001012478 NM_007279 NP_001012496 NP_009210 XM_006722994 XM_011526410 XP_006723057 XP_011524712	14
chr19	55599024	55655591	56568	*	9	7160	35722.1	TRUE	chr19	55600022	55603138	3117	+	55602113	55602907	147807	147807	ZNF524	NM_153219 NP_694951 XM_011526487 XP_011524789	3
chr19	55599024	55655591	56568	*	9	7160	35722.1	TRUE	chr19	55620741	55624566	3826	-	55621751	55624561	147808	147808	ZNF784	NM_203374 NP_976308	2
chr19	55599024	55655591	56568	*	9	7160	35722.1	TRUE	chr19	55576774	55580848	4075	-	55577951	55579639	163033	163033	ZNF579	NM_152600 NP_689813 XM_017026409 XM_017026410 XM_017026411 XP_016881898 XP_016881899 XP_016881900	2
chr19	55599024	55655591	56568	*	9	7160	35722.1	TRUE	chr19	55641062	55653161	12100	+	55649047	55652746	29903	29903	CCDC106	NM_001370467 NM_001370468 NM_001370469 NM_001370470 NM_001370471 NM_013301 NP_001357396 NP_001357397 NP_001357398 NP_001357399 NP_001357400 NP_037433	6
chr19	55599024	55655591	56568	*	9	7160	35722.1	TRUE	chr19	55675226	55709858	34633	+	55677172	55709790	29924	29924	EPN1	NM_001130071 NM_001130072 NM_001321263 NM_013333 NP_001123543 NP_001123544 NP_001308192 NP_037465	15
chr19	55599024	55655591	56568	*	9	7160	35722.1	TRUE	chr19	55640985	55643470	2486	+	55642509	55643027	51157	51157	ZNF580	NM_001163423 NM_016202 NM_207115 NP_001156895 NP_057286 NP_996998	2
chr19	55599024	55655591	56568	*	9	7160	35722.1	TRUE	chr19	55635459	55645623	10165	+	55644572	55645165	51545	51545	ZNF581	NM_016535 NP_057619 XM_006723240 XM_017026867 XP_006723303 XP_016882356	5
chr19	55599024	55655591	56568	*	9	7160	35722.1	TRUE	chr19	55591376	55601970	10595	-	55592450	55597865	84922	84922	FIZ1	NM_032836 NP_116225 XM_005259352 XM_011527426 XP_005259409 XP_011525728	3
chr14	49852315	49894185	41871	*	6	6453	35317.3	TRUE	chr14	49893082	49897054	3973	+	49893737	49894264	382	382	ARF6	NM_001663 NP_001654	2
chr14	49852315	49894185	41871	*	6	6453	35317.3	TRUE	chr14	49782083	49852821	70739	-	49784636	49852753	9147	9147	NEMF	NM_001301732 NM_004713 NP_001288661 NP_004704 XM_011537317 XM_011537318 XM_017021760 XM_017021761 XP_011535619 XP_011535620 XP_016877249 XP_016877250 XR_001750595 XR_943557	34
chr2	46534544	46580473	45930	*	10	9267	35183	TRUE	chr2	46541806	46584688	42883	+	46543047	46581083	23433	23433	RHOQ	NM_012249 NP_036381 XM_005264229 XM_011532726 XM_011532728 XM_017003716 XP_005264286 XP_011531028 XP_011531030 XP_016859205	9
chr2	46534544	46580473	45930	*	10	9267	35183	TRUE	chr2	46490750	46542577	51828	-	46512031	46512711	90423	90423	ATP6V1E2	NM_001318063 NM_001371281 NM_001371282 NM_001371283 NM_080653 NP_001304992 NP_001358210 NP_001358211 NP_001358212 XM_011533148 XM_011533149 XM_011533150 XM_011533151 XM_011533152 XM_011533153 XM_017005225 XP_011531450 XP_011531451 XP_011531452 XP_011531453 XP_011531454 XP_011531455 XP_016860714	9
chr2	46534544	46580473	45930	*	10	9267	35183	TRUE	chr2	46616416	46630176	13761	+	46617283	46624227	9419	9419	CRIPT	NM_014171 NP_054890	6
chr2	70085043	70133829	48787	*	8	8929	35175.2	TRUE	chr2	70087477	70089203	1727	+	70087744	70088814	5093	5093	PCBP1	NM_006196 NP_006187	1
chr2	70085043	70133829	48787	*	8	8929	35175.2	TRUE	chr2	69960089	70102909	142821	-	69960657	69961436	151516	151516	ASPRV1	NM_152792 NP_690005 NR_170375 NR_170376 NR_170631 NR_170632 NR_170634 NR_170635 NR_170636 NR_170637 NR_170638 NR_170639	40
chr8	80078821	80177600	98780	*	15	10081	34516	TRUE	chr8	79918717	80030289	111573	-	79918980	80030248	28957	28957	MRPS28	NM_014018 NP_054737	6
chr9	99221272	99266895	45624	*	5	6279	34078.8	TRUE	chr9	99222064	99230615	8552	+	99222364	99230424	10952	10952	SEC61B	NM_006808 NP_006799	5
chr9	99221272	99266895	45624	*	5	6279	34078.8	TRUE	chr9	99216425	99221942	5518	-	99217934	99221894	85365	85365	ALG2	NM_033087 NM_197973 NP_149078 NR_024532	3
chr11	73141191	73178499	37309	*	9	7611	34073.9	TRUE	chr11	72836745	73142318	305574	-	72838791	73141877	9873	9873	FCHSD2	NM_014824 NP_055639 XM_011545409 XM_011545410 XM_017018632 XP_011543711 XP_011543712 XP_016874121 XR_001748055	24
chr11	73141191	73178499	37309	*	9	7611	34073.9	TRUE	chr11	73218281	73242427	24147	+	73234160	73235293	5029	5029	P2RY2	NM_002564 NM_176071 NM_176072 NP_002555 NP_788085 NP_788086	4
chr3	197712135	197761330	49196	*	9	7806	34062.6	TRUE	chr3	197737179	197787596	50418	+	197749533	197781909	84248	84248	FYTTD1	NM_001011537 NM_032288 NP_001011537 NP_115664 NR_027840	15
chr3	197712135	197761330	49196	*	9	7806	34062.6	TRUE	chr3	197791226	197888436	97211	+	197791279	197883666	84859	84859	LRCH3	NM_001363887 NM_001365715 NM_001365716 NM_001365717 NM_001365718 NM_001365719 NM_032773 NP_001350816 NP_001352644 NP_001352645 NP_001352646 NP_001352647 NP_001352648 NP_116162 NR_158582 XM_005269363 XM_005269367 XM_011513242 XM_017007350 XM_017007351 XM_017007352 XP_005269420 XP_005269424 XP_011511544 XP_016862839 XP_016862840 XP_016862841 XR_001740329	23
chr3	197712135	197761330	49196	*	9	7806	34062.6	TRUE	chr3	197668867	197749727	80861	-	197675018	197736719	9711	9711	RUBCN	NM_001145642 NM_001346873 NM_014687 NP_001139114 NP_001333802 NP_055502 XM_005269374 XM_006713827 XM_006713828 XM_006713829 XM_006713830 XM_006713831 XM_017007543 XM_017007544 XM_017007545 XM_024453838 XP_005269431 XP_006713890 XP_006713891 XP_006713892 XP_006713893 XP_006713894 XP_016863032 XP_016863033 XP_016863034 XP_024309606	24
chr2	64166053	64235366	69314	*	14	10408	33725.6	TRUE	chr2	64092652	64144420	51769	-	64094702	64108310	57162	57162	PELI1	NM_020651 NP_065702 XM_005264437 XM_011532994 XM_011532996 XM_011532997 XM_017004520 XM_017004521 XP_005264494 XP_011531296 XP_011531298 XP_011531299 XP_016860009 XP_016860010	10
chr5	67165768	67216588	50821	*	7	8127	33698.7	TRUE	chr5	67179613	67196799	17187	-	67182857	67196641	4064	4064	CD180	NM_005582 NP_005573 XM_005248504 XP_005248561	3
chr11	7511552	7525163	13612	*	4	4689	33646.4	TRUE	chr11	7513298	7657127	143830	+	7549476	7656798	8495	8495	PPFIBP2	NM_001256568 NM_001256569 NM_001351853 NM_001351854 NM_001351855 NM_001351856 NM_001351857 NM_001351858 NM_001351859 NM_001351860 NM_001351861 NM_001351862 NM_003621 NP_001243497 NP_001243498 NP_001338782 NP_001338783 NP_001338784 NP_001338785 NP_001338786 NP_001338787 NP_001338788 NP_001338789 NP_001338790 NP_001338791 NP_003612 NR_147792 XM_005253177 XM_006718349 XM_006718352 XM_006718353 XM_01…	36
chr15	72461611	72475537	13927	*	2	2898	33635.5	TRUE	chr15	72474330	72602987	128658	+	72474640	72583292	25820	25820	ARIH1	NM_005744 NP_005735	16
chr19	41296207	41329243	33037	*	4	6236	33582.6	TRUE	chr19	41350853	41425002	74150	+	41378310	41424723	593	593	BCKDHA	NM_000709 NM_001164783 NP_000700 NP_001158255	13
chr19	41296207	41329243	33037	*	4	6236	33582.6	TRUE	chr19	41350911	41384083	33173	+	41354174	41383904	641649	641649	TMEM91	NM_001042595 NM_001098821 NM_001098822 NM_001098823 NM_001098824 NM_001098825 NM_001369862 NM_001369864 NP_001036060 NP_001092291 NP_001092292 NP_001092293 NP_001092294 NP_001092295 NP_001356791 NP_001356793	8
chr19	41296207	41329243	33037	*	4	6236	33582.6	TRUE	chr19	41310172	41324873	14702	+	41310311	41322715	90324	90324	CCDC97	NM_001346100 NM_052848 NP_001333029 NP_443080 XM_017027442 XP_016882931	6
chr19	16571311	16600091	28781	*	5	5930	33571.8	TRUE	chr19	16517894	16542437	24544	-	16519159	16542378	10523	10523	CHERP	NM_006387 NP_006378	18
chr19	16571311	16600091	28781	*	5	5930	33571.8	TRUE	chr19	16549837	16572415	22579	-	16553679	16572364	79939	79939	SLC35E1	NM_024881 NP_079157	9
chr5	148825821	148854307	28487	*	6	4497	33567.9	TRUE	chr5	148826611	148828623	2013	+	148826832	148828073	154	154	ADRB2	NM_000024 NP_000015	1
chr4	73568342	73634517	66176	*	9	8548	33252.8	TRUE	chr4	73571550	73620631	49082	-	73576235	73620500	166824	166824	RASSF6	NM_001270391 NM_001270392 NM_177532 NM_201431 NP_001257320 NP_001257321 NP_803876 NP_958834 XM_011531687 XM_011531688 XM_011531689 XM_011531690 XM_017007837 XM_017007838 XM_024453917 XP_011529989 XP_011529990 XP_011529991 XP_011529992 XP_016863326 XP_016863327 XP_024309685	14
chr1	160710699	160808263	97565	*	14	12287	33195.3	TRUE	chr1	160739057	160754821	15765	+	160739302	160753177	57823	57823	SLAMF7	NM_001282588 NM_001282589 NM_001282590 NM_001282591 NM_001282592 NM_001282593 NM_001282594 NM_001282595 NM_001282596 NM_021181 NP_001269517 NP_001269518 NP_001269519 NP_001269520 NP_001269521 NP_001269522 NP_001269523 NP_001269524 NP_001269525 NP_067004 XM_011509828 XM_011509829 XM_024448757 XP_011508130 XP_011508131 XP_024304525	6
chr1	160710699	160808263	97565	*	14	12287	33195.3	TRUE	chr1	160678746	160711831	33086	-	160679052	160711763	962	962	CD48	NM_001256030 NM_001778 NP_001242959 NP_001769 XM_005245625 XM_011510171 XM_017002867 XP_005245682 XP_011508473 XP_016858356	4
chr1	160710699	160808263	97565	*	14	12287	33195.3	TRUE	chr1	160796074	160828261	32188	+	160796188	160827816	4063	4063	LY9	NM_001033667 NM_001261456 NM_001261457 NM_002348 NP_001028839 NP_001248385 NP_001248386 NP_002339 XM_011509548 XM_011509549 XM_011509550 XM_011509552 XM_011509556 XM_011509560 XM_017001297 XM_017001298 XM_017001299 XM_017001300 XM_017001301 XM_017001302 XM_017001303 XM_017001304 XP_011507850 XP_011507851 XP_011507852 XP_011507854 XP_011507858 XP_011507862 XP_016856786 XP_016856787 XP_016856788 XP…	13
chr15	88621182	88640712	19531	*	3	5359	32990.5	TRUE	chr15	88621337	88632281	10945	+	88626210	88630294	64782	64782	AEN	NM_022767 NP_073604 XM_005254966 XM_005254967 XM_006720645 XM_011521905 XM_017022489 XM_017022490 XP_005255023 XP_005255024 XP_006720708 XP_011520207 XP_016877978 XP_016877979	3
chr15	88621182	88640712	19531	*	3	5359	32990.5	TRUE	chr15	88635670	88656483	20814	+	88639367	88655531	3669	3669	ISG20	NM_001303233 NM_001303234 NM_001303235 NM_001303236 NM_001303237 NM_002201 NP_001290162 NP_001290163 NP_001290164 NP_001290165 NP_001290166 NP_002192 NR_130134	7
chr6	7878098	7918430	40333	*	6	5308	32811.1	TRUE	chr6	7881517	7910788	29272	-	7883144	7910776	81567	81567	TXNDC5	NM_001145549 NM_022085 NM_030810 NP_001139021 NP_110437	11
chr9	124834820	124881209	46390	*	6	6916	32675.9	TRUE	chr9	124853417	124857890	4474	+	124853532	124857630	401551	401551	WDR38	NM_001045476 NM_001276374 NM_001276375 NM_001276376 NP_001038941 NP_001263303 NP_001263304 NP_001263305 XM_005251987 XM_024447545 XP_005252044 XP_024303313	9
chr9	124834820	124881209	46390	*	6	6916	32675.9	TRUE	chr9	124862130	124877733	15604	+	124869291	124876940	81873	81873	ARPC5L	NM_030978 NP_112240 XM_011519067 XP_011517369 XR_001746387	6
chr9	124834820	124881209	46390	*	6	6916	32675.9	TRUE	chr9	124857880	124861981	4102	-	124857918	124861912	11224	11224	RPL35	NM_007209 NP_009140	4
chr4	176308234	176385423	77190	*	10	10793	32653.1	TRUE	chr4	176319966	176332245	12280	+	176320077	176328330	60559	60559	SPCS3	NM_021928 NP_068747	4
chr4	176308234	176385423	77190	*	10	10793	32653.1	TRUE	chr4	176213673	176277571	63899	-	176215600	176269108	140458	140458	ASB5	NM_080874 NP_543150 XM_005262759 XM_011531616 XM_011531617 XP_005262816 XP_011529918 XP_011529919	13
chr14	69667348	69713741	46394	*	11	9512	31658.6	TRUE	chr14	69726900	69772005	45106	+	69768157	69771461	6430	6430	SRSF5	NM_001039465 NM_001320214 NM_006925 NP_001034554 NP_001307143 NP_008856 XM_005267999 XM_005268000 XM_011537077 XM_017021593 XM_017021594 XP_005268056 XP_005268057 XP_011535379 XP_016877082 XP_016877083 XR_001750508 XR_001750509 XR_001750510 XR_001750512 XR_001750513 XR_001750514 XR_943505 XR_943506	5
chr17	45222365	45262824	40460	*	6	5566	31510.5	TRUE	chr17	45221885	45247319	25435	+	45222125	45246970	752	752	FMNL1	NM_005892 NP_005883 XM_006722062 XM_006722063 XM_006722064 XM_006722065 XM_006722066 XM_006722069 XM_006722070 XM_011525179 XM_011525180 XM_011525182 XP_006722125 XP_006722126 XP_006722127 XP_006722128 XP_006722129 XP_006722132 XP_006722133 XP_011523481 XP_011523482 XP_011523484	21
chr17	45222365	45262824	40460	*	6	5566	31510.5	TRUE	chr17	45254393	45262094	7702	-	45254426	45262016	124783	124783	SPATA32	NM_152343 NP_689556	7
chr9	127754079	127825999	71921	*	7	6851	31502.6	TRUE	chr9	127690348	127724873	34526	-	127690750	127715639	138428	138428	PTRH1	NM_001002913 NM_001345977 NM_001345978 NM_001345979 NM_001345980 NP_001002913 NP_001332906 NP_001332907 NP_001332908 NP_001332909 XR_002956760	9
chr9	127754079	127825999	71921	*	7	6851	31502.6	TRUE	chr9	127731524	127735313	3790	-	127732034	127735270	27433	27433	TOR2A	NM_001085347 NM_001134430 NM_001134431 NM_001252018 NM_001252021 NM_001252023 NM_130459 NP_001078816 NP_001127902 NP_001127903 NP_001238947 NP_001238950 NP_001238952 NP_569726 XM_011518554 XP_011516856 XR_001746274 XR_001746275	1
chr9	127754079	127825999	71921	*	7	6851	31502.6	TRUE	chr9	127785679	127790792	5114	+	127785798	127789543	1025	1025	CDK9	NM_001261 NP_001252	7
chr9	127754079	127825999	71921	*	7	6851	31502.6	TRUE	chr9	127794597	127814327	19731	+	127802925	127813604	2356	2356	FPGS	NM_001018078 NM_001288803 NM_004957 NP_001018088 NP_001275732 NP_004948 NR_110170 XM_005251864 XM_011518439 XM_017014565 XM_017014566 XP_005251921 XP_011516741 XP_016870054 XP_016870055 XR_242581 XR_242582	18
chr9	127754079	127825999	71921	*	7	6851	31502.6	TRUE	chr9	127738317	127778710	40394	-	127738746	127778627	10044	10044	SH2D3C	NM_001142531 NM_001142532 NM_001142533 NM_001142534 NM_001252334 NM_005489 NM_170600 NP_001136003 NP_001136004 NP_001136005 NP_001136006 NP_001239263 NP_005480 NP_733745	17
chr14	49620214	49636074	15861	*	2	4190	31380.6	TRUE	chr14	49620799	49623481	2683	+	49621269	49622612	4247	4247	MGAT2	NM_001015883 NM_002408 NP_002399	1
chr14	49620214	49636074	15861	*	2	4190	31380.6	TRUE	chr14	49570984	49598690	27707	-	49577812	49598452	6235	6235	RPS29	NM_001030001 NM_001032 NM_001351375 NP_001023 NP_001025172 NP_001338304	4
chr14	49620214	49636074	15861	*	2	4190	31380.6	TRUE	chr14	49618530	49620626	2097	-	49618784	49619104	6166	6166	RPL36AL	NM_001001 NP_000992	2
chr14	49620214	49636074	15861	*	2	4190	31380.6	TRUE	chr14	49625174	49635244	10071	-	49625542	49635149	55172	55172	DNAAF2	NM_001083908 NM_001378453 NM_018139 NP_001077377 NP_001365382 NP_060609	3
chr6	125780375	125818983	38609	*	7	7353	31372.9	TRUE	chr6	125781161	125932034	150874	+	125815355	125928771	135112	135112	NCOA7	NM_001122842 NM_001199619 NM_001199620 NM_001199621 NM_001199622 NM_181782 NP_001116314 NP_001186548 NP_001186549 NP_001186550 NP_001186551 NP_861447 XM_005266822 XM_006715340 XM_011535455 XM_017010269 XM_017010270 XM_017010271 XM_017010272 XM_017010273 XM_017010274 XM_024446331 XM_024446332 XP_005266879 XP_006715403 XP_011533757 XP_016865758 XP_016865759 XP_016865760 XP_016865761 XP_016865762 XP…	22
chr5	157571066	157624660	53595	*	9	7295	31363.2	TRUE	chr5	157395534	157575775	180242	-	157477682	157575696	8728	8728	ADAM19	NM_023038 NM_033274 NP_150377 XM_017010009 XP_016865498	25
chr5	157571066	157624660	53595	*	9	7295	31363.2	TRUE	chr5	157671533	157680158	8626	+	157671615	157679999	100190949	100190949	C5orf52	NM_001145132 NP_001138604 XM_011534416 XM_017008909 XP_011532718 XP_016864398	3
chr1	206001782	206068530	66749	*	13	8251	31358	TRUE	chr1	205976740	206003461	26722	-	205978851	205994135	338382	338382	RAB7B	NM_001164522 NM_001304839 NM_177403 NP_001157994 NP_001291768 NP_796377 XM_006711288 XP_006711351	7
chr1	206001782	206068530	66749	*	13	8251	31358	TRUE	chr1	206052845	206102449	49605	+	206097829	206101952	440712	440712	RHEX	NM_001007544 NM_001369490 NP_001007545 NP_001356419	10
chr1	206001782	206068530	66749	*	13	8251	31358	TRUE	chr1	206008535	206023909	15375	-	206010140	206023791	1510	1510	CTSE	NM_001317331 NM_001910 NM_148964 NP_001304260 NP_001901 NP_683865 XM_011509244 XM_011509245 XP_011507546 XP_011507547	10
chr7	98202399	98252588	50190	*	7	7232	31256	TRUE	chr7	98211439	98215457	4019	+	98212310	98212879	168620	168620	BHLHA15	NM_177455 NP_803238	2
chr7	98202399	98252588	50190	*	7	7232	31256	TRUE	chr7	98252379	98310441	58063	+	98281796	98306555	25798	25798	BRI3	NM_001159491 NM_015379 NP_001152963 NP_056194 XM_017011931 XM_017011932 XM_017011933 XM_017011934 XM_017011935 XM_017011936 XP_016867420 XP_016867421 XP_016867422 XP_016867423 XP_016867424 XP_016867425	9
chr7	98202399	98252588	50190	*	7	7232	31256	TRUE	chr7	98214624	98252232	37609	-	98217390	98246146	25851	25851	TECPR1	NM_015395 NP_056210 XM_005250253 XM_017011937 XM_017011938 XP_005250310 XP_016867426 XP_016867427 XR_428174	29
chr2	230864900	230925331	60432	*	8	8014	31250	TRUE	chr2	230864639	230879248	14610	+	230865026	230878099	81618	81618	ITM2C	NM_001012514 NM_001012516 NM_001287240 NM_001287241 NM_030926 NP_001012532 NP_001012534 NP_001274169 NP_001274170 NP_112188	10
chr9	131252469	131275994	23526	*	7	5815	31243.6	TRUE	chr9	131289459	131359022	69564	+	131289998	131346872	105376299	105376299	LOC105376299	XR_001746959 XR_930400	5
chr9	131252469	131275994	23526	*	7	5815	31243.6	TRUE	chr9	131289723	131309261	19539	+	131289998	131308287	84814	84814	PLPP7	NM_032728 NP_116117 XM_005272230 XM_005272231 XP_005272287 XP_005272288	3
chr9	131252469	131275994	23526	*	7	5815	31243.6	TRUE	chr9	131258076	131276510	18435	-	131260822	131276179	286336	286336	FAM78A	NM_001399459 NM_001400581 NM_001400582 NM_001400583 NM_001400584 NM_001400585 NM_001400586 NM_001400587 NM_001400588 NM_001400589 NM_001400590 NM_001400591 NM_001400592 NM_001400593 NM_001400594 NM_001400595 NM_033387 NP_001386388 NP_001387510 NP_001387511 NP_001387512 NP_001387513 NP_001387514 NP_001387515 NP_001387516 NP_001387517 NP_001387518 NP_001387519 NP_001387520 NP_001387521 NP_001387522…	5
chr1	204674418	204715427	41010	*	8	7882	31150.4	TRUE	chr1	204617170	204685738	68569	-	204617851	204619992	10446	10446	LRRN2	NM_006338 NM_201630 NP_006329 NP_963924 XM_005244827 XM_011509066 XM_017000050 XP_005244884 XP_011507368 XP_016855539	4
chr8	143928215	143987053	58839	*	8	8021	30980	TRUE	chr8	143857324	143878467	21144	-	143857987	143873253	83481	83481	EPPK1	NM_031308 NP_112598 XM_017013890 XM_017013892 XP_016869379 XP_016869381	2
chr8	143928215	143987053	58839	*	8	8021	30980	TRUE	chr8	143990056	143993415	3360	+	143991224	143992841	2907	2907	GRINA	NM_000837 NM_001009184 NP_000828 NP_001009184	5
chr8	143928215	143987053	58839	*	8	8021	30980	TRUE	chr8	144012280	144047114	34835	+	144012516	144046956	375686	375686	SPATC1	NM_001134374 NM_198572 NP_001127846 NP_940974 XM_011517021 XM_011517022 XM_011517023 XM_011517024 XM_011517025 XM_017013399 XP_011515323 XP_011515324 XP_011515325 XP_011515326 XP_011515327 XP_016868888 XR_928328 XR_928329	5
chr8	143928215	143987053	58839	*	8	8021	30980	TRUE	chr8	143915153	143976734	61582	-	143916177	143975369	5339	5339	PLEC	NM_000445 NM_201378 NM_201379 NM_201380 NM_201381 NM_201382 NM_201383 NM_201384 NP_000436 NP_958780 NP_958781 NP_958782 NP_958783 NP_958784 NP_958785 NP_958786 XM_005250976 XM_005250978 XM_005250979 XM_005250980 XM_005250981 XM_005250982 XM_005250983 XM_005250984 XM_006716588 XM_006716589 XM_006716590 XM_011517130 XM_011517131 XM_011517132 XP_005251033 XP_005251035 XP_005251036 XP_005251037 XP_00…	44
chr7	104940221	104967840	27620	*	5	4959	30895.8	TRUE	chr7	104940943	105115019	174077	+	105040953	105113333	55904	55904	KMT2E	NM_018682 NM_032187 NM_182931 NP_061152 NP_891847 XM_005250493 XM_011516400 XM_017012435 XM_024446837 XP_005250550 XP_011514702 XP_016867924 XP_024302605 XR_001744836	36
chr6	142906901	142952908	46008	*	9	7702	30806.3	TRUE	chr6	142751469	142946365	194897	-	142753107	142774738	3097	3097	HIVEP2	NM_006734 NP_006725 XM_017010805 XM_024446416 XM_024446417 XM_024446418 XM_024446419 XP_016866294 XP_024302184 XP_024302185 XP_024302186 XP_024302187	13
chr5	177426036	177456116	30081	*	7	6307	30795.9	TRUE	chr5	177400109	177400661	553	-	177400163	177400576	345456	345456	PFN3	NM_001029886 NP_001025057	1
chr5	177426036	177456116	30081	*	7	6307	30795.9	TRUE	chr5	177446445	177456286	9842	+	177455068	177456121	80758	80758	PRR7	NM_001174101 NM_001174102 NM_001375593 NM_001375594 NM_030567 NP_001167572 NP_001167573 NP_001362522 NP_001362523 NP_085044	6
chr5	177426036	177456116	30081	*	7	6307	30795.9	TRUE	chr5	177402141	177409564	7424	-	177402292	177409527	2161	2161	F12	NM_000505 NP_000496 XM_011534462 XP_011532764	11
chr19	45075208	45138254	63047	*	9	9362	30761.7	TRUE	chr19	45071500	45076478	4979	-	45071601	45076373	162979	162979	ZNF296	NM_145288 NP_660331	3
chr19	45075208	45138254	63047	*	9	9362	30761.7	TRUE	chr19	45093174	45148077	54904	+	45093326	45146472	284352	284352	PPP1R37	NM_019121 NP_061994 XM_006723159 XP_006723222 XR_001753668	9
chr19	45075208	45138254	63047	*	9	9362	30761.7	TRUE	chr19	45178784	45216933	38150	+	45179297	45179905	388552	388552	BLOC1S3	NM_212550 NP_997715 XR_001753683	7
chr19	45075208	45138254	63047	*	9	9362	30761.7	TRUE	chr19	45079288	45305284	225997	+	45251589	45302710	57787	57787	MARK4	NM_001199867 NM_031417 NP_001186796 NP_113605 XM_006723307 XP_006723370	19
chr19	45075208	45138254	63047	*	9	9362	30761.7	TRUE	chr19	45079195	45091518	12324	+	45090115	45090510	79760	79760	GEMIN7	NM_001007269 NM_001007270 NM_001319054 NM_001319055 NM_024707 NP_001007270 NP_001007271 NP_001305983 NP_001305984 NP_078983 XM_005259262 XM_005259263 XM_017027312 XP_005259319 XP_005259320 XP_016882801	4
chr15	90902141	90935665	33525	*	4	6303	30580.6	TRUE	chr15	90902218	90922584	20367	+	90904208	90919787	4122	4122	MAN2A2	NM_001320977 NM_006122 NP_001307906 NP_006113 NR_135502 NR_135503 NR_135504 XM_005254910 XM_011521565 XM_011521566 XM_017022184 XM_017022185 XM_024449920 XM_024449921 XM_024449922 XM_024449923 XM_024449924 XP_005254967 XP_011519867 XP_011519868 XP_016877673 XP_016877674 XP_024305688 XP_024305689 XP_024305690 XP_024305691 XP_024305692 XR_001751281 XR_002957636 XR_002957637 XR_931829	23
chr15	90902141	90935665	33525	*	4	6303	30580.6	TRUE	chr15	90930180	90954093	23914	+	90934041	90953716	55898	55898	UNC45A	NM_001039675 NM_001323619 NM_001323620 NM_001323621 NM_017979 NM_018671 NP_001034764 NP_001310548 NP_001310549 NP_001310550 NP_061141 XM_005254963 XM_011521780 XM_017022407 XM_024449983 XM_024449984 XM_024449985 XM_024449986 XP_005255020 XP_011520082 XP_016877896 XP_024305751 XP_024305752 XP_024305753 XP_024305754	20
chr15	90902141	90935665	33525	*	4	6303	30580.6	TRUE	chr15	90954881	90963125	8245	+	90956735	90961769	91433	91433	RCCD1	NM_001017919 NM_033544 NP_001017919 NP_291022 XR_001751414 XR_001751415 XR_001751416 XR_001751417	5
chr15	90902141	90935665	33525	*	4	6303	30580.6	TRUE	chr15	90929968	90935196	5229	-	90931275	90932540	374659	374659	HDDC3	NM_001286451 NM_198527 NP_001273380 NP_940929 NR_104447	1
chr7	100428311	100445648	17338	*	7	6846	30481.3	TRUE	chr7	100428790	100434118	5329	+	100430019	100433554	56257	56257	MEPCE	NM_001194990 NM_001194991 NM_001194992 NM_001363486 NM_019606 NP_001181919 NP_001181920 NP_001181921 NP_001350415 NP_062552	6
chr7	100428311	100445648	17338	*	7	6846	30481.3	TRUE	chr7	100400826	100428992	28167	-	100401014	100420649	55063	55063	ZCWPW1	NM_001258008 NM_001386008 NM_001386009 NM_001386010 NM_001386011 NM_001386012 NM_001386013 NM_001386015 NM_001386016 NM_001386017 NM_001386018 NM_001386019 NM_001386020 NM_001386021 NM_001386022 NM_001386023 NM_001388066 NM_017984 NP_001244937 NP_001372937 NP_001372938 NP_001372939 NP_001372940 NP_001372941 NP_001372942 NP_001372944 NP_001372945 NP_001372946 NP_001372947 NP_001372948 NP_001372949…	18
chr7	100428311	100445648	17338	*	7	6846	30481.3	TRUE	chr7	100435282	100436497	1216	-	100435360	100436374	221908	221908	PPP1R35	NM_001346938 NM_145030 NP_001333867 NP_659467 XM_011515914 XP_011514216	2
chr7	100428311	100445648	17338	*	7	6846	30481.3	TRUE	chr7	100483927	100494802	10876	+	100485312	100493903	222950	222950	NYAP1	NM_173564 NP_775835	7
chr9	129869199	129901699	32501	*	5	6296	30394	TRUE	chr9	129812942	129824244	11303	-	129813972	129824181	1861	1861	TOR1A	NM_000113 NP_000104 XR_929731	7
chr9	129869199	129901699	32501	*	5	6296	30394	TRUE	chr9	129827290	129835863	8574	-	129828161	129835221	51759	51759	C9orf78	NM_016520 NP_057604 XM_011518780 XP_011517082	10
chr15	100918156	100954066	35911	*	10	6489	30182.4	TRUE	chr15	100919327	101078257	158931	+	100924633	101068848	79705	79705	LRRK1	NM_001039843 NM_024652 NP_078928 XM_005254979 XM_011522012 XM_011522013 XM_011522014 XM_011522015 XM_011522016 XM_011522017 XM_011522018 XM_011522019 XM_017022570 XP_005255036 XP_011520314 XP_011520315 XP_011520316 XP_011520317 XP_011520318 XP_011520319 XP_011520320 XP_011520321 XP_016878059 XR_931905	37
chr1	36149105	36196927	47823	*	7	6343	29857.3	TRUE	chr1	36155579	36180849	25271	+	36156418	36180258	55700	55700	MAP7D1	NM_001286365 NM_001286366 NM_001388490 NM_018067 NP_001273294 NP_001273295 NP_001375419 NP_060537	16
chr1	36149105	36196927	47823	*	7	6343	29857.3	TRUE	chr1	36095239	36125222	29984	-	36097569	36100242	1296	1296	COL8A2	NM_001294347 NM_005202 NP_001281276 NP_005193 XM_005270477 XP_005270534	4
chr1	36149105	36196927	47823	*	7	6343	29857.3	TRUE	chr1	36136570	36156053	19484	-	36137203	36149378	27095	27095	TRAPPC3	NM_001270894 NM_001270895 NM_001270896 NM_001270897 NM_014408 NP_001257823 NP_001257824 NP_001257825 NP_001257826 NP_055223 NR_073097 NR_073098	6
chr1	36149105	36196927	47823	*	7	6343	29857.3	TRUE	chr1	36224432	36305357	80926	+	36282564	36304524	9967	9967	THRAP3	NM_001321471 NM_001321473 NM_005119 NP_001308400 NP_001308402 NP_005110 XM_024451301 XM_024451302 XP_024307069 XP_024307070 XR_002958230 XR_002958231	15
chr11	58568031	58579875	11845	*	4	3358	29753.3	TRUE	chr11	58579063	58621550	42488	+	58579282	58617706	80829	80829	ZFP91	NM_001197051 NM_053023 NP_001183980 NP_444251	11
chr11	58568031	58579875	11845	*	4	3358	29753.3	TRUE	chr11	58579172	58624639	45468	+	58579282	58622780	386607	386607	ZFP91-CNTF	NM_170768 NR_024091	13
chr11	58568031	58579875	11845	*	4	3358	29753.3	TRUE	chr11	58622665	58625733	3069	+	58622753	58624522	1270	1270	CNTF	NM_000614 NP_000605	2
chr11	58568031	58579875	11845	*	4	3358	29753.3	TRUE	chr11	58526871	58578220	51350	-	58527454	58578046	9404	9404	LPXN	NM_001143995 NM_001307951 NM_004811 NP_001137467 NP_001294880 NP_004802 XM_006718750 XM_011545388 XM_011545390 XM_011545391 XM_011545393 XM_011545394 XM_017018579 XP_006718813 XP_011543690 XP_011543692 XP_011543693 XP_011543695 XP_011543696 XP_016874068	11
chr3	101778694	101829589	50896	*	9	7050	29707.4	TRUE	chr3	101779202	101828231	49030	+	101785597	101821954	91775	91775	NXPE3	NM_001134456 NM_001348990 NM_001348991 NM_001348992 NM_001348993 NM_001348994 NM_001348995 NM_001348996 NM_001348997 NM_001348998 NM_145037 NP_001127928 NP_001335919 NP_001335920 NP_001335921 NP_001335922 NP_001335923 NP_001335924 NP_001335925 NP_001335926 NP_001335927 NP_659474 NR_145993	9
chr3	101778694	101829589	50896	*	9	7050	29707.4	TRUE	chr3	101827991	101861022	33032	+	101849629	101859371	64332	64332	NFKBIZ	NM_001005474 NM_031419 NP_001005474 NP_113607	14
chr16	21486156	21520745	34590	*	5	5420	29653.6	TRUE	chr16	21402237	21448071	45835	-	21402284	21425098	23117	23117	NPIPB3	NM_130464 NP_569731	16
chr2	197254764	197323637	68874	*	11	8632	29491.7	TRUE	chr2	196967017	197311173	344157	-	196967439	197310604	91526	91526	ANKRD44	NM_001195144 NM_001367495 NM_001367496 NM_001367497 NM_153697 NP_001182073 NP_001354424 NP_001354425 NP_001354426 NP_710181 NR_160034 XM_005246947 XM_005246948 XM_006712838 XM_011512148 XM_024453216 XP_005247004 XP_005247005 XP_006712901 XP_011510450 XP_024308984 XR_001739037 XR_923062	32
chr5	6712084	6738106	26023	*	4	6502	29037.9	TRUE	chr5	6713432	6757044	43613	+	6713984	6754945	11044	11044	TENT4A	NM_001171805 NM_001171806 NM_006999 NP_001165276 NP_008930 XM_011513945 XM_017008988 XM_017008989 XM_017008990 XM_024454343 XP_011512247 XP_016864477 XP_016864478 XP_016864479 XP_024310111	13
chr17	58317326	58358476	41151	*	6	5567	29019	TRUE	chr17	58269855	58280935	11081	-	58270656	58280758	4353	4353	MPO	NM_000250 NP_000241	12
chr17	58317326	58358476	41151	*	6	5567	29019	TRUE	chr17	58301231	58328795	27565	-	58302268	58327920	9256	9256	TSPOAP1	NM_001261835 NM_004758 NM_024418 NP_001248764 NP_004749 NP_077729	32
chr17	58317326	58358476	41151	*	6	5567	29019	TRUE	chr17	58345175	58353093	7919	-	58346246	58352135	6827	6827	SUPT4H1	NM_003168 NP_003159 NR_073470	6
chr9	127897250	127956221	58972	*	9	7229	28994.5	TRUE	chr9	127815013	127854658	39646	-	127815682	127854355	2022	2022	ENG	NM_000118 NM_001114753 NM_001278138 NP_000109 NP_001108225 NP_001265067	16
chr9	127897250	127956221	58972	*	9	7229	28994.5	TRUE	chr9	127866486	127885589	19104	-	127868008	127874617	203	203	AK1	NM_000476 NM_001318121 NM_001318122 NP_000467 NP_001305050 NP_001305051 XM_017014428 XM_024447439 XM_024447440 XP_016869917 XP_024303207 XP_024303208	12
chr9	127897250	127956221	58972	*	9	7229	28994.5	TRUE	chr9	127867850	127906022	38173	-	127885187	127897981	30815	30815	ST6GALNAC6	NM_001286999 NM_001287000 NM_001287001 NM_001287002 NM_001287003 NM_001388489 NM_001400830 NM_001400831 NM_001400832 NM_001400833 NM_001400834 NM_001400835 NM_013443 NP_001273928 NP_001273929 NP_001273930 NP_001273931 NP_001273932 NP_001375418 NP_001387759 NP_001387760 NP_001387761 NP_001387762 NP_001387763 NP_001387764 NP_038471 NR_104629 NR_174612 NR_174613 NR_174614 NR_174615 NR_174616 NR_1746…	19
chr9	127897250	127956221	58972	*	9	7229	28994.5	TRUE	chr9	127907886	127917041	9156	-	127908392	127916419	27090	27090	ST6GALNAC4	NM_014403 NM_175039 NM_175040 NP_778204 NP_778205 XM_011518527 XM_011518529 XM_024447518 XP_011516829 XP_011516831 XP_024303286 XR_002956775	6
chr9	127897250	127956221	58972	*	9	7229	28994.5	TRUE	chr9	127920881	127930785	9905	-	127921847	127930752	138429	138429	PIP5KL1	NM_001135219 NM_173492 NP_001128691 NP_775763 XM_017014279 XP_016869768	11
chr9	127897250	127956221	58972	*	9	7229	28994.5	TRUE	chr9	127935099	127937854	2756	-	127935722	127937820	8818	8818	DPM2	NM_001378436 NM_001378437 NM_003863 NM_152690 NP_001365365 NP_001365366 NP_003854 NR_165631 NR_165632	2
chr11	62540889	62557424	16536	*	6	5471	28967.7	TRUE	chr11	62433542	62556235	122694	-	62433838	62536098	79026	79026	AHNAK	NM_001346445 NM_001346446 NM_001620 NM_024060 NP_001333374 NP_001333375 NP_001611 NP_076965 XM_017018270 XP_016873759	10
chr3	195894779	195915285	20507	*	4	5488	28942.2	TRUE	chr3	195863364	195911945	48582	-	195864181	195896226	10188	10188	TNK2	NM_001010938 NM_001308046 NM_001382271 NM_001382272 NM_001382273 NM_001382274 NM_001382275 NM_001386164 NM_001387707 NM_001387708 NM_001387709 NM_001387710 NM_001387711 NM_001387712 NM_001387713 NM_001387714 NM_001387715 NM_001387716 NM_001387717 NM_001387718 NM_001387719 NM_001387720 NM_001387721 NM_005781 NP_001010938 NP_001294975 NP_001369200 NP_001369201 NP_001369202 NP_001369203 NP_001369204…	25
chr22	22879986	22914489	34504	*	6	6181	28910.8	TRUE	chr22	22887780	22896111	8332	+	22888054	22895694	100423062	100423062	IGLL5	NM_001178126 NM_001256296 NP_001171597 NP_001243225	3
chr20	47727334	47785072	57739	*	11	7824	28835.2	TRUE	chr20	47656912	47786616	129705	-	47658362	47757363	55959	55959	SULF2	NM_001161841 NM_001387048 NM_001387049 NM_001387050 NM_001387051 NM_001387052 NM_001387053 NM_001387054 NM_001387055 NM_018837 NM_198596 NP_001155313 NP_001373977 NP_001373978 NP_001373979 NP_001373980 NP_001373981 NP_001373982 NP_001373983 NP_001373984 NP_061325 NP_940998 XM_006723830 XM_011528914 XP_006723893 XP_011527216	23
chr16	22150262	22207841	57580	*	7	6150	28806.2	TRUE	chr16	22162492	22192208	29717	+	22165583	22190393	100288072	100288072	SDR42E2	NM_001365288 NM_001394319 NP_001352217 NP_001381248 XM_017023977 XM_017023978 XM_017023979 XM_017023980 XM_017023981 XM_017023982 XP_016879466 XP_016879467 XP_016879468 XP_016879469 XP_016879470 XP_016879471	13
chr19	42108652	42130745	22094	*	5	4808	28791.6	TRUE	chr19	41998321	42070206	71886	-	41998871	42065770	2901	2901	GRIK5	NM_001301030 NM_002088 NP_001287959 NP_002079 XM_011526862 XM_011526865 XM_011526867 XM_011526868 XM_011526869 XM_011526870 XM_011526871 XM_017026713 XP_011525164 XP_011525167 XP_011525169 XP_011525170 XP_011525171 XP_011525172 XP_011525173 XP_016882202 XR_935810	22
chr10	110841694	110903926	62233	*	11	9543	28552	TRUE	chr10	110871795	110900006	28212	+	110876028	110898088	27250	27250	PDCD4	NM_001199492 NM_014456 NM_145341 NP_001186421 NP_055271 NP_663314	14
chr10	110841694	110903926	62233	*	11	9543	28552	TRUE	chr10	110919367	111017307	97941	+	110964359	111011818	8036	8036	SHOC2	NM_001269039 NM_001324336 NM_001324337 NM_007373 NP_001255968 NP_001311265 NP_001311266 NP_031399 NR_136749	15
chr4	152499163	152562140	62978	*	9	5184	28510.8	TRUE	chr4	152320544	152536092	215549	-	152322881	152411803	55294	55294	FBXW7	NM_001013415 NM_001257069 NM_001349798 NM_018315 NM_033632 NP_001013433 NP_001243998 NP_001336727 NP_060785 NP_361014 XM_011532084 XM_011532085 XM_011532086 XM_011532087 XM_011532088 XM_024454121 XM_024454122 XM_024454123 XM_024454124 XM_024454125 XM_024454126 XP_011530386 XP_011530387 XP_011530388 XP_011530389 XP_011530390 XP_024309889 XP_024309890 XP_024309891 XP_024309892 XP_024309893 XP_02430…	16
chr14	100285136	100376663	91528	*	12	7715	28510.7	TRUE	chr14	100323339	100330421	7083	+	100323415	100329645	283600	283600	SLC25A47	NM_001350877 NM_207117 NP_001337806 NP_997000	6
chr14	100285136	100376663	91528	*	12	7715	28510.7	TRUE	chr14	100279959	100306547	26589	-	100292283	100306232	123096	123096	SLC25A29	NM_001039355 NM_001291813 NM_001291814 NM_001352820 NM_001352821 NM_001352822 NM_001352823 NM_152333 NP_001034444 NP_001278742 NP_001278743 NP_001339749 NP_001339750 NP_001339751 NP_001339752 NP_689546 XM_006720038 XM_006720039 XM_011536447 XM_011536448 XM_017020988 XM_024449479 XP_006720101 XP_006720102 XP_011534749 XP_011534750 XP_016876477 XP_024305247 XR_001750155	8
chr14	100285136	100376663	91528	*	12	7715	28510.7	TRUE	chr14	100376418	100530303	153886	+	100380925	100530041	79446	79446	WDR25	NM_001161476 NM_001350947 NM_001350948 NM_001350949 NM_001350950 NM_001387351 NM_024515 NP_001154948 NP_001337876 NP_001337877 NP_001337878 NP_001374280 NP_078791	12
chr14	100285136	100376663	91528	*	12	7715	28510.7	TRUE	chr14	100333790	100376805	43016	-	100334875	100369185	7453	7453	WARS1	NM_004184 NM_173701 NM_213645 NM_213646 NP_004175 NP_776049 NP_998810 NP_998811 XM_005268044 XM_006720249 XM_011537133 XM_011537136 XM_017021627 XM_017021629 XM_024449706 XM_024449707 XM_024449708 XP_005268101 XP_006720312 XP_011535435 XP_011535438 XP_016877116 XP_016877118 XP_024305474 XP_024305475 XP_024305476	19
chr17	3892099	3916544	24446	*	4	5612	28505.3	TRUE	chr17	3802158	3846246	44089	-	3812546	3846223	55421	55421	NCBP3	NM_001114118 NM_001398494 NM_018553 NP_001107590 NP_001385423 XM_005256717 XM_006721556 XM_011523954 XM_011523955 XM_017024826 XM_017024827 XM_017024828 XM_017024829 XP_005256774 XP_006721619 XP_011522256 XP_011522257 XP_016880315 XP_016880316 XP_016880317 XP_016880318	14
chr17	3892099	3916544	24446	*	4	5612	28505.3	TRUE	chr17	3860315	3894891	34577	-	3862211	3890730	84254	84254	CAMKK1	NM_032294 NM_172206 NM_172207 NP_115670 NP_757343 NP_757344	17
chr17	3892099	3916544	24446	*	4	5612	28505.3	TRUE	chr17	3896592	3916476	19885	-	3897814	3916225	5023	5023	P2RX1	NM_002558 NP_002549 XM_006721529 XM_011523896 XM_011523897 XM_011523898 XM_011523899 XM_011523900 XP_006721592 XP_011522198 XP_011522199 XP_011522200 XP_011522201 XP_011522202 XR_934029 XR_934030	12
chr7	135147211	135172150	24940	*	4	5636	28497.8	TRUE	chr7	135148072	135166215	18144	+	135164442	135164999	55281	55281	TMEM140	NM_018295 NP_060765	3
chr7	135147211	135172150	24940	*	4	5636	28497.8	TRUE	chr7	135092363	135170795	78433	-	135166611	135168922	78996	78996	CYREN	NM_001243749 NM_001243751 NM_001243752 NM_001243753 NM_001243754 NM_001243755 NM_001305629 NM_001305630 NM_001363329 NM_001363330 NM_024033 NP_001230678 NP_001230680 NP_001230681 NP_001230682 NP_001230683 NP_001230684 NP_001292558 NP_001292559 NP_001350258 NP_001350259 NP_076938 XM_017012591 XM_017012592 XM_017012593 XM_017012594 XM_017012595 XM_024446930 XP_016868080 XP_016868081 XP_016868082 XP…	8
chr15	75450378	75455886	5509	*	4	3301	28477.5	TRUE	chr15	75369379	75455842	86464	-	75371979	75430375	25942	25942	SIN3A	NM_001145357 NM_001145358 NM_015477 NP_001138829 NP_001138830 NP_056292 XM_006720465 XM_006720466 XM_006720467 XM_024449896 XP_006720528 XP_006720529 XP_006720530 XP_024305664	29
chr1	16613317	16673142	59826	*	6	5439	28461.3	TRUE	chr1	16562319	16613562	51244	-	16563943	16592021	55672	55672	NBPF1	NM_017940 NP_060410	33
chr2	37305773	37358950	53178	*	12	7735	28300.8	TRUE	chr2	37342827	37373322	30496	+	37344732	37372827	25797	25797	QPCT	NM_012413 NP_036545	10
chr2	37305773	37358950	53178	*	12	7735	28300.8	TRUE	chr2	37250502	37324833	74332	-	37253177	37316524	23683	23683	PRKD3	NM_005813 NP_005804 XM_005264237 XM_005264238 XM_017003741 XM_017003742 XM_017003743 XM_017003744 XM_024452777 XP_005264294 XP_005264295 XP_016859230 XP_016859231 XP_016859232 XP_016859233 XP_024308545	21
chr15	80969820	81002437	32618	*	5	6424	28288.7	TRUE	chr15	81000923	81005788	4866	+	81002142	81003360	59274	59274	TLNRD1	NM_022566 NP_072088	1
chr15	80969820	81002437	32618	*	5	6424	28288.7	TRUE	chr15	81007033	81149179	142147	+	81134330	81148533	161502	161502	CFAP161	NM_001353365 NM_173528 NP_001340294 NP_775799 XM_006720408 XM_017021963 XP_006720471 XP_016877452	10
chr15	80969820	81002437	32618	*	5	6424	28288.7	TRUE	chr15	80946289	80989828	43540	-	80952093	80989791	23184	23184	MESD	NM_015154 NP_055969 NR_126327 NR_126328	7
chr15	65286112	65305367	19256	*	3	4017	28285.6	TRUE	chr15	65234460	65300618	66159	-	65248214	65286426	54956	54956	PARP16	NM_001316943 NM_001316944 NM_017851 NP_001303872 NP_001303873 NP_060321 XM_006720589 XM_006720590 XM_006720592 XM_011521742 XM_017022386 XM_017022387 XM_017022388 XM_017022389 XM_024449969 XM_024449970 XP_006720652 XP_006720653 XP_006720655 XP_011520044 XP_016877875 XP_016877876 XP_016877877 XP_016877878 XP_024305737 XP_024305738 XR_001751341 XR_001751342 XR_001751343 XR_429459 XR_429460	10
chr1	248818767	248874135	55369	*	7	6898	28055	TRUE	chr1	248838210	248849517	11308	+	248847275	248848633	79894	79894	ZNF672	NM_024836 NP_079112 XM_005270336 XP_005270393	6
chr1	248818767	248874135	55369	*	7	6898	28055	TRUE	chr1	248810446	248825915	15470	-	248811900	248824935	80851	80851	SH3BP5L	NM_001322462 NM_001322463 NM_001322464 NM_030645 NP_001309391 NP_001309392 NP_001309393 NP_085148 XM_017002407 XP_016857896	10
chr1	248818767	248874135	55369	*	7	6898	28055	TRUE	chr1	248850006	248859144	9139	-	248850210	248858514	55657	55657	ZNF692	NM_001136036 NM_001193328 NM_001350072 NM_001350073 NM_017865 NP_001129508 NP_001180257 NP_001337001 NP_001337002 NP_060335 XM_011544220 XM_011544221 XM_011544222 XM_011544223 XM_011544227 XM_017001698 XM_017001699 XM_017001700 XM_017001702 XM_017001704 XM_017001705 XM_024448274 XP_011542522 XP_011542523 XP_011542524 XP_011542525 XP_011542529 XP_016857187 XP_016857188 XP_016857189 XP_016857191 XP…	10
chr1	248818767	248874135	55369	*	7	6898	28055	TRUE	chr1	248906196	248919946	13751	+	248913863	248918363	267002	267002	PGBD2	NM_001017434 NM_170725 NP_001017434 NP_733843 XM_005270333 XM_011544159 XM_011544161 XP_005270390 XP_011542461 XP_011542463	4
chr15	90178545	90220108	41564	*	6	6826	28021.8	TRUE	chr15	90233808	90245811	12004	+	90240909	90242066	390637	390637	GDPGP1	NM_001013657 NM_001322811 NP_001013679 NP_001309740	5
chr15	90178545	90220108	41564	*	6	6826	28021.8	TRUE	chr15	90234200	90272208	38009	+	90240909	90264967	440307	440307	TTLL13	NM_001029964 NM_001396017 NP_001382946	20
chr15	90178545	90220108	41564	*	6	6826	28021.8	TRUE	chr15	90265659	90314499	48841	+	90265713	90295224	51335	51335	NGRN	NM_001033088 NM_016645 NP_001028260 NR_028052	6
chr14	20454429	20477768	23340	*	4	5246	27927.4	TRUE	chr14	20455191	20457772	2582	+	20455646	20457508	328	328	APEX1	NM_001244249 NM_001641 NM_080648 NM_080649 NP_001231178 NP_001632 NP_542379 NP_542380	3
chr14	20454429	20477768	23340	*	4	5246	27927.4	TRUE	chr14	20365667	20413501	47835	-	20368437	20408439	7011	7011	TEP1	NM_001319035 NM_007110 NP_001305964 NP_009041 XM_005268027 XM_011537110 XP_005268084 XP_011535412 XR_001750531 XR_245720	54
chr14	20454429	20477768	23340	*	4	5246	27927.4	TRUE	chr14	20468954	20477089	8136	+	20469525	20476601	4860	4860	PNP	NM_000270 NP_000261	7
chr14	20454429	20477768	23340	*	4	5246	27927.4	TRUE	chr14	20425852	20436166	10315	-	20428849	20435811	123103	123103	KLHL33	NM_001109997 NM_001365790 NP_001103467 NP_001352719 XM_011536450 XP_011534752	5
chr14	20454429	20477768	23340	*	4	5246	27927.4	TRUE	chr14	20446401	20455089	8689	-	20447240	20454683	55644	55644	OSGEP	NM_017807 NP_060277	6
chr14	20454429	20477768	23340	*	4	5246	27927.4	TRUE	chr14	20505537	20511155	5619	+	20505941	20511122	338879	338879	RNASE10	NM_001012975 NM_001386206 NP_001012993 NP_001373135	2
chr14	20454429	20477768	23340	*	4	5246	27927.4	TRUE	chr14	20457681	20461465	3785	-	20458332	20461325	90809	90809	PIP4P1	NM_001100814 NM_144568 NP_001094284 NP_653169 XM_024449739 XM_024449740 XP_024305507 XP_024305508	2
chr7	7672692	7721680	48989	*	11	8704	27854.6	TRUE	chr7	7636518	7718607	82090	-	7637000	7640418	6119	6119	RPA3	NM_002947 NP_002938	9
chr5	151736878	151772986	36109	*	9	6111	27850.8	TRUE	chr5	151661096	151686975	25880	-	151663571	151676188	6678	6678	SPARC	NM_001309443 NM_001309444 NM_003118 NP_001296372 NP_001296373 NP_003109	12
chr5	151736878	151772986	36109	*	9	6111	27850.8	TRUE	chr5	151771045	151812785	41741	+	151786621	151804639	10146	10146	G3BP1	NM_005754 NM_198395 NP_005745 NP_938405	16
chr5	151736878	151772986	36109	*	9	6111	27850.8	TRUE	chr5	151742316	151772532	30217	-	151746325	151758551	475	475	ATOX1	NM_004045 NP_004036	6
chr7	121329324	121396625	67302	*	10	7753	27849.2	TRUE	chr7	121325367	121341104	15738	+	121325416	121339345	51384	51384	WNT16	NM_016087 NM_057168 NP_057171 NP_476509	5
chr7	121329324	121396625	67302	*	10	7753	27849.2	TRUE	chr7	121348878	121396364	47487	-	121350461	121382969	10447	10447	FAM3C	NM_001040020 NM_014888 NP_001035109 NP_055703 XM_011515736 XM_011515737 XP_011514038 XP_011514039	11
chr15	39920573	39960660	40088	*	6	4998	27828.4	TRUE	chr15	39934115	40035591	101477	+	39934196	40035084	440275	440275	EIF2AK4	NM_001013703 NP_001013725	39
chr15	39920573	39960660	40088	*	6	4998	27828.4	TRUE	chr15	39799008	39920266	121259	-	39801132	39920026	11245	11245	GPR176	NM_001271854 NM_001271855 NM_007223 NP_001258783 NP_001258784 NP_009154 XM_011521167 XM_011521168 XM_017021873 XM_017021874 XM_017021875 XM_017021876 XM_017021877 XM_017021878 XM_024449835 XP_011519469 XP_011519470 XP_016877362 XP_016877363 XP_016877364 XP_016877365 XP_016877366 XP_016877367 XP_024305603	9
chr2	126644582	126682776	38195	*	6	5304	27755.1	TRUE	chr2	126656133	126696667	40535	+	126656264	126696142	2995	2995	GYPC	NM_001256584 NM_002101 NM_016815 NP_001243513 NP_002092 NP_058131 XM_006712460 XP_006712523	7
chr14	34539090	34564915	25826	*	4	4499	27749	TRUE	chr14	34515938	34539704	23767	-	34516310	34539628	55837	55837	EAPP	NM_001318916 NM_018453 NP_001305845 NP_060923 XM_011536958 XM_017021460 XP_011535260 XP_016876949	6
chr3	129305576	129329437	23862	*	6	4148	27580.9	TRUE	chr3	129314771	129316286	1516	-	129315261	129315902	8971	8971	H1-10	NM_006026 NP_006017	1
chr9	93058763	93096685	37923	*	6	4780	27501	TRUE	chr9	93058688	93085133	26446	+	93058743	93084747	203328	203328	SUSD3	NM_001287005 NM_001287006 NM_001287007 NM_001287008 NM_145006 NP_001273934 NP_001273935 NP_001273936 NP_001273937 NP_659443 XM_011518358 XM_011518359 XM_011518361 XM_011518362 XM_017014448 XM_017014449 XM_017014450 XM_017014451 XP_011516660 XP_011516661 XP_011516663 XP_011516664 XP_016869937 XP_016869938 XP_016869939 XP_016869940	6
chr9	93058763	93096685	37923	*	6	4780	27501	TRUE	chr9	93096217	93113283	17067	+	93096346	93113107	84270	84270	CARD19	NM_001318010 NM_001318011 NM_032310 NP_001304939 NP_001304940 NP_115686 NR_134464 NR_134465 NR_134466 NR_134467 NR_134468 NR_160511 NR_160512 NR_160513 XR_929848	5
chr15	75202063	75219859	17797	*	5	3774	27185.2	TRUE	chr15	75258334	75273455	15122	+	75258599	75270199	653641	653641	GOLGA6C	NM_001164404 NP_001157876 XM_017022519 XP_016878008	18
chr3	170037526	170058297	20772	*	7	5666	26796.7	TRUE	chr3	170037995	170085392	47398	+	170083973	170084989	26996	26996	GPR160	NM_014373 NP_055188 XM_005247346 XM_005247347 XM_017006161 XM_024453449 XM_024453450 XM_024453451 XP_005247403 XP_005247404 XP_016861650 XP_024309217 XP_024309218 XP_024309219	8
chr7	44973973	45001671	27699	*	7	4424	26723	TRUE	chr7	44999475	45076469	76995	+	45000334	45076057	83605	83605	CCM2	NM_001029835 NM_001167934 NM_001167935 NM_001363458 NM_001363459 NM_031443 NP_001025006 NP_001161406 NP_001161407 NP_001350387 NP_001350388 NP_113631 NR_030770 XM_006715785 XM_006715786 XM_011515561 XM_011515563 XM_017012671 XM_017012672 XM_017012673 XP_006715848 XP_006715849 XP_011513863 XP_011513865 XP_016868160 XP_016868161 XP_016868162 XR_428088	11
chr7	44973973	45001671	27699	*	7	4424	26723	TRUE	chr7	44962662	44979088	16427	-	44962739	44978961	64005	64005	MYO1G	NM_033054 NP_149043 XM_017012503 XM_017012504 XP_016867992 XP_016867993 XR_926943	17
chr11	47376798	47408911	32114	*	4	6244	26685.9	TRUE	chr11	47331406	47352702	21297	-	47331871	47352647	4607	4607	MYBPC3	NM_000256 NP_000247	36
chr11	47376798	47408911	32114	*	4	6244	26685.9	TRUE	chr11	47407132	47416496	9365	+	47410095	47415363	91252	91252	SLC39A13	NM_001128225 NM_001330245 NM_152264 NP_001121697 NP_001317174 NP_689477 NR_134854 XM_006718381 XM_006718383 XM_006718384 XM_006718385 XM_011520466 XM_011520467 XM_011520468 XM_011520469 XM_011520470 XM_017018540 XM_017018541 XM_024448762 XP_006718444 XP_006718446 XP_006718447 XP_006718448 XP_011518768 XP_011518769 XP_011518770 XP_011518771 XP_011518772 XP_016874029 XP_016874030 XP_024304530 XR_00…	8
chr11	47376798	47408911	32114	*	4	6244	26685.9	TRUE	chr11	47354860	47409369	54510	-	47355227	47378353	6688	6688	SPI1	NM_001080547 NM_003120 NP_001074016 NP_003111 XM_011520307 XM_017018173 XP_011518609 XP_016873662	9
chr11	10287912	10323250	35339	*	8	7990	26557	TRUE	chr11	10305073	10307397	2325	+	10305701	10306641	133	133	ADM	NM_001124 NP_001115	1
chr11	10287912	10323250	35339	*	8	7990	26557	TRUE	chr11	10317671	10507579	189909	+	10451022	10505884	272	272	AMPD3	NM_000480 NM_001025389 NM_001025390 NM_001172430 NM_001172431 NP_000471 NP_001020560 NP_001020561 NP_001165901 NP_001165902	23
chr11	10287912	10323250	35339	*	8	7990	26557	TRUE	chr11	9776776	10304877	528102	-	9780418	10294069	81846	81846	SBF2	NM_001386339 NM_001386342 NM_030962 NP_001373268 NP_001373271 NP_112224 XM_005253155 XM_011520394 XM_011520395 XM_011520396 XM_017018372 XM_017018373 XM_017018375 XM_017018376 XM_017018377 XP_005253212 XP_011518696 XP_011518697 XP_011518698 XP_016873861 XP_016873862 XP_016873864 XP_016873865 XP_016873866 XR_001747994	50
chr4	40178525	40205854	27330	*	4	3183	26514.8	TRUE	chr4	40191053	40246967	55915	+	40243387	40243962	399	399	RHOH	NM_001278359 NM_001278360 NM_001278361 NM_001278362 NM_001278363 NM_001278364 NM_001278365 NM_001278366 NM_001278367 NM_001278368 NM_001278369 NM_004310 NP_001265288 NP_001265289 NP_001265290 NP_001265291 NP_001265292 NP_001265293 NP_001265294 NP_001265295 NP_001265296 NP_001265297 NP_001265298 NP_004301 XM_011513692 XM_017008188 XM_017008189 XM_024454042 XP_011511994 XP_016863677 XP_016863678 XP…	12
chrX	154321709	154438237	116529	*	9	9869	26491.5	TRUE	chrX	154271265	154295853	24589	-	154271415	154292117	1527	1527	TEX28	NM_001205201 NM_001586 NP_001192130 NP_001577 XM_011531116 XM_011531117 XM_011531118 XP_011529418 XP_011529419 XP_011529420	8
chrX	154321709	154438237	116529	*	9	9869	26491.5	TRUE	chrX	154379273	154381574	2302	+	154379485	154381463	2010	2010	EMD	NM_000117 NP_000108 XM_024452349 XP_024308117	4
chrX	154321709	154438237	116529	*	9	9869	26491.5	TRUE	chrX	154389955	154409168	19214	+	154398520	154409152	6134	6134	RPL10	NM_001256577 NM_001256580 NM_001303624 NM_001303625 NM_001303626 NM_006013 NP_001243506 NP_001243509 NP_001290553 NP_001290554 NP_001290555 NP_006004	7
chrX	154321709	154438237	116529	*	9	9869	26491.5	TRUE	chrX	154411524	154421726	10203	+	154411844	154421004	6901	6901	TAFAZZIN	NM_000116 NM_001303465 NM_181311 NM_181312 NM_181313 NM_181314 NP_000107 NP_001290394 NP_851828 NP_851829 NP_851830 NR_024048 XM_006724836 XM_006724837 XM_006724839 XM_006724841 XM_006724842 XM_011531189 XM_011531191 XM_017029761 XM_017029762 XM_017029763 XM_017029764 XM_017029765 XM_024452431 XP_006724899 XP_006724900 XP_006724902 XP_006724904 XP_006724905 XP_011529491 XP_011529493 XP_016885250 …	5
chrX	154321709	154438237	116529	*	9	9869	26491.5	TRUE	chrX	154348524	154374634	26111	-	154348680	154371245	2316	2316	FLNA	NM_001110556 NM_001456 NP_001104026 NP_001447	41
chrX	154321709	154438237	116529	*	9	9869	26491.5	TRUE	chrX	154428633	154436516	7884	+	154428693	154435891	537	537	ATP6AP1	NM_001183 NP_001174 XM_011531179 XP_011529481	7
chrX	154321709	154438237	116529	*	9	9869	26491.5	TRUE	chrX	154436913	154443467	6555	+	154437255	154442672	2664	2664	GDI1	NM_001493 NP_001484	7
chrX	154321709	154438237	116529	*	9	9869	26491.5	TRUE	chrX	154444141	154450654	6514	+	154444236	154450432	9130	9130	FAM50A	NM_004699 NP_004690	12
chrX	154321709	154438237	116529	*	9	9869	26491.5	TRUE	chrX	154401236	154412112	10877	-	154402707	154405568	1774	1774	DNASE1L1	NM_001009932 NM_001009933 NM_001009934 NM_001303620 NM_006730 NP_001009932 NP_001009933 NP_001009934 NP_001290549 NP_006721 XM_005277829 XM_011531122 XM_017029332 XP_005277886 XP_011529424 XP_016884821	9
chrX	154321709	154438237	116529	*	9	9869	26491.5	TRUE	chrX	154458281	154477779	19499	+	154460184	154472685	55558	55558	PLXNA3	NM_017514 NP_059984 XM_005274705 XM_005274706 XM_006724829 XM_011531183 XP_005274762 XP_005274763 XP_006724892 XP_011529485 XR_001755709 XR_002958778 XR_430556 XR_938510	32
chr1	150548742	150590806	42065	*	6	5798	26327.6	TRUE	chr1	150549369	150560937	11569	+	150552289	150560196	54507	54507	ADAMTSL4	NM_001288607 NM_001288608 NM_001378596 NM_019032 NM_025008 NP_001275536 NP_001275537 NP_001365525 NP_061905 NP_079284 XM_011509644 XM_011509645 XM_011509648 XM_011509649 XM_011509650 XM_011509651 XM_011509652 XM_017001506 XM_017001507 XP_011507946 XP_011507947 XP_011507950 XP_011507951 XP_011507952 XP_011507953 XP_011507954 XP_016856995 XP_016856996 XR_001737242 XR_921844	21
chr1	150548742	150590806	42065	*	6	5798	26327.6	TRUE	chr1	150563102	150579738	16637	-	150577364	150579530	4170	4170	MCL1	NM_001197320 NM_021960 NM_182763 NP_001184249 NP_068779 NP_877495	2
chr3	5181761	5213007	31247	*	5	4231	26302.2	TRUE	chr3	5187646	5219958	32313	+	5187783	5215918	9695	9695	EDEM1	NM_014674 NP_055489 XM_011534271 XM_011534272 XP_011532573 XP_011532574 XR_001740383 XR_001740384	15
chr3	50588125	50624623	36499	*	5	4845	26299.6	TRUE	chr3	50611520	50649291	37772	+	50617566	50648046	7867	7867	MAPKAPK3	NM_001243925 NM_001243926 NM_004635 NP_001230854 NP_001230855 NP_004626 XR_940501	16
chr3	50588125	50624623	36499	*	5	4845	26299.6	TRUE	chr3	50558025	50571027	13003	-	50559657	50565699	51161	51161	C3orf18	NM_001171740 NM_001171741 NM_001171743 NM_016210 NP_001165211 NP_001165212 NP_001165214 NP_057294 XM_011533781 XM_011533782 XM_011533783 XM_011533784 XM_011533785 XM_011533788 XM_011533789 XM_011533790 XM_017006545 XM_017006546 XM_017006547 XM_024453548 XM_024453549 XM_024453550 XP_011532083 XP_011532084 XP_011532085 XP_011532086 XP_011532087 XP_011532090 XP_011532091 XP_011532092 XP_016862034 XP…	8
chr3	50588125	50624623	36499	*	5	4845	26299.6	TRUE	chr3	50606489	50611774	5286	-	50607607	50611650	1154	1154	CISH	NM_013324 NM_145071 NP_037456 NP_659508 XM_011533329 XP_011531631	2
chr15	40549884	40569925	20042	*	5	4913	26293.8	TRUE	chr15	40569299	40574949	5651	+	40569338	40574261	27079	27079	RPUSD2	NM_001286407 NM_152260 NP_001273336 NP_689473	3
chr15	40549884	40569925	20042	*	5	4913	26293.8	TRUE	chr15	40594020	40664342	70323	+	40602932	40662188	57082	57082	KNL1	NM_020380 NM_144508 NM_170589 NP_653091 NP_733468 XM_017022432 XP_016877921	27
chr15	40549884	40569925	20042	*	5	4913	26293.8	TRUE	chr15	40528683	40565057	36375	-	40528742	40564780	90416	90416	CCDC32	NM_001080791 NM_001080792 NM_001289132 NM_001382434 NM_001382435 NM_001382436 NM_001382437 NM_001382438 NM_001382439 NM_001382440 NM_001382441 NM_001382442 NM_052849 NP_001074260 NP_001074261 NP_001276061 NP_001369363 NP_001369364 NP_001369365 NP_001369366 NP_001369367 NP_001369368 NP_001369369 NP_001369370 NP_001369371 NP_443081	8
chr16	11689112	11748797	59686	*	8	5653	26093.6	TRUE	chr16	11679083	11742857	63775	-	11679195	11742730	51061	51061	TXNDC11	NM_001303447 NM_001324022 NM_001324024 NM_001324025 NM_015914 NP_001290376 NP_001310951 NP_001310953 NP_001310954 NP_056998 NR_136671 NR_136672 NR_136673 NR_136674 XM_011522515 XM_011522516 XM_017023268 XP_011520817 XP_011520818 XP_016878757	15
chr4	76198046	76214525	16480	*	4	3736	26064.8	TRUE	chr4	76114659	76148444	33786	-	76115366	76148374	53371	53371	NUP54	NM_001278603 NM_017426 NP_001265532 NP_059122 NR_103780 NR_103781 NR_103782 XM_011532033 XM_017008295 XP_011530335 XP_016863784 XR_001741237 XR_001741238	16
chr4	76198046	76214525	16480	*	4	3736	26064.8	TRUE	chr4	76214040	76283783	69744	+	76214275	76283458	100129583	100129583	FAM47E	NM_001136570 NM_001242936 NP_001130042 NP_001229865	9
chr4	76198046	76214525	16480	*	4	3736	26064.8	TRUE	chr4	76251721	76311129	59409	+	76251747	76309173	100631383	100631383	FAM47E-STBD1	NM_001242939 NP_001229868	8
chr4	184265787	184289264	23478	*	7	5888	25996.1	TRUE	chr4	184088706	184221230	132525	-	184091177	184217819	133121	133121	ENPP6	NM_153343 NP_699174	11
chr15	55255041	55296805	41765	*	6	5151	25806	TRUE	chr15	55318960	55355648	36689	+	55319251	55355432	9488	9488	PIGB	NM_004855 NP_004846 XM_005254795 XM_011522235 XM_011522236 XM_011522237 XM_017022730 XM_017022731 XM_017022732 XP_005254852 XP_011520537 XP_011520538 XP_011520539 XP_016878219 XP_016878220 XP_016878221 XR_001751422 XR_001751423 XR_931950	15
chr2	135948241	136026023	77783	*	12	7347	25738.1	TRUE	chr2	135905881	135986100	80220	-	135907316	135985563	1615	1615	DARS1	NM_001293312 NM_001349 NP_001280241 NP_001340	19
chr11	62591110	62613497	22388	*	3	4939	25736.1	TRUE	chr11	62433542	62556235	122694	-	62433838	62536098	79026	79026	AHNAK	NM_001346445 NM_001346446 NM_001620 NM_024060 NP_001333374 NP_001333375 NP_001611 NP_076965 XM_017018270 XP_016873759	10
chr11	62591110	62613497	22388	*	3	4939	25736.1	TRUE	chr11	62611722	62615116	3395	+	62613282	62614839	6094	6094	ROM1	NM_000327 NP_000318	4
chr11	62591110	62613497	22388	*	3	4939	25736.1	TRUE	chr11	62559596	62577321	17726	-	62559679	62573842	1937	1937	EEF1G	NM_001404 NP_001395	14
chr11	62591110	62613497	22388	*	3	4939	25736.1	TRUE	chr11	62559603	62591637	32035	-	62574805	62591599	64852	64852	TUT1	NM_001367906 NM_022830 NP_001354835 NP_073741	17
chr11	62591110	62613497	22388	*	3	4939	25736.1	TRUE	chr11	62593214	62601865	8652	-	62593875	62601450	9219	9219	MTA2	NM_001330292 NM_004739 NP_001317221 NP_004730	15
chr11	62591110	62613497	22388	*	3	4939	25736.1	TRUE	chr11	62602218	62612775	10558	-	62602302	62612457	256364	256364	EML3	NM_001300793 NM_001300794 NM_153265 NP_001287722 NP_001287723 NP_694997 XM_005273878 XM_006718489 XM_006718490 XM_006718491 XM_011544896 XM_011544897 XM_017017480 XM_017017481 XM_017017482 XP_005273935 XP_006718552 XP_006718553 XP_006718554 XP_011543198 XP_011543199 XP_016872969 XP_016872970 XP_016872971	19
chr17	68228558	68263663	35106	*	7	5288	25426.4	TRUE	chr17	68259182	68493670	234489	+	68307494	68420463	22901	22901	ARSG	NM_001267727 NM_001352899 NM_001352900 NM_001352901 NM_001352902 NM_001352903 NM_001352904 NM_001352905 NM_001352906 NM_001352907 NM_001352909 NM_001352910 NM_014960 NP_001254656 NP_001339828 NP_001339829 NP_001339830 NP_001339831 NP_001339832 NP_001339833 NP_001339834 NP_001339835 NP_001339836 NP_001339838 NP_001339839 NP_055775 XM_011524536 XM_011524537 XM_011524546 XM_017024360 XM_017024365 XM…	22
chr15	58730205	58777501	47297	*	6	6109	25393.2	TRUE	chr15	58771192	58861900	90709	+	58771396	58854610	54629	54629	MINDY2	NM_001040450 NM_001040453 NM_019092 NP_001035540 NP_001035543 XM_011521687 XM_011521688 XM_011521689 XM_011521690 XM_017022332 XM_017022333 XM_017022334 XM_017022335 XM_024449964 XP_011519989 XP_011519990 XP_011519991 XP_011519992 XP_016877821 XP_016877822 XP_016877823 XP_016877824 XP_024305732 XR_001751323 XR_001751324	10
chr15	58730205	58777501	47297	*	6	6109	25393.2	TRUE	chr15	58588809	58749791	160983	-	58597457	58749534	102	102	ADAM10	NM_001110 NM_001320570 NP_001101 NP_001307499 XM_024449818 XP_024305586	20
chr1	160634354	160685485	51132	*	6	8137	25255.2	TRUE	chr1	160608106	160647044	38939	-	160610748	160646945	6504	6504	SLAMF1	NM_001330754 NM_003037 NP_001317683 NP_003028 NR_104399 NR_104400 NR_104401 XM_005245456 XM_011509905 XM_017002130 XM_017002131 XP_005245513 XP_011508207 XP_016857619 XP_016857620	8
chr22	46027050	46070983	43934	*	10	8070	25178	TRUE	chr22	45920366	45977162	56797	-	45922856	45976754	7477	7477	WNT7B	NM_058238 NP_478679 XM_011530366 XP_011528668	7
chr7	30275902	30323341	47440	*	6	7828	25175.9	TRUE	chr7	30284597	30412502	127906	+	30285358	30362434	223082	223082	ZNRF2	NM_147128 NP_667339 XR_926925	8
chr18	48914124	48953267	39144	*	8	5491	25153.6	TRUE	chr18	48919853	48950965	31113	-	48921372	48950424	4092	4092	SMAD7	NM_001190821 NM_001190822 NM_001190823 NM_005904 NP_001177750 NP_001177751 NP_001177752 NP_005895	7
chr14	81464651	81500669	36019	*	6	4406	25111.7	TRUE	chr14	81260652	81436465	175814	-	81261782	81398382	85439	85439	STON2	NM_001256430 NM_001366849 NM_001366850 NM_001394390 NM_033104 NP_001243359 NP_001353778 NP_001353779 NP_001381319 XM_011537240 XM_011537241 XM_011537242 XM_024449733 XM_024449734 XM_024449735 XM_024449736 XP_011535542 XP_011535543 XP_011535544 XP_024305501 XP_024305502 XP_024305503 XP_024305504	15
chr1	92929525	93015145	85621	*	10	9060	25057.3	TRUE	chr1	92832737	92961522	128786	-	92833020	92961429	388650	388650	DIPK1A	NM_001006605 NM_001252269 NM_001252270 NM_001252271 NM_001252273 NP_001006606 NP_001239198 NP_001239199 NP_001239200 NP_001239202	7
chr4	86917784	86972965	55182	*	6	5615	25043.5	TRUE	chr4	86935002	87141039	206038	+	86948534	87135701	4299	4299	AFF1	NM_001166693 NM_001313959 NM_001313960 NM_005935 NP_001160165 NP_001300888 NP_001300889 NP_005926 XM_005263007 XM_005263009 XM_005263011 XM_005263013 XM_011531973 XM_017008215 XM_017008216 XP_005263064 XP_005263066 XP_005263068 XP_005263070 XP_011530275 XP_016863704 XP_016863705	25
chr4	86917784	86972965	55182	*	6	5615	25043.5	TRUE	chr4	86876205	86936178	59974	-	86887760	86891520	132989	132989	C4orf36	NM_001369888 NM_001369889 NM_144645 NP_001356817 NP_001356818 NP_653246 XM_011531612 XM_011531613 XM_011531615 XM_017007746 XP_011529914 XP_011529915 XP_011529917 XP_016863235	11
chr13	40961490	41019446	57957	*	11	7061	25008	TRUE	chr13	41061509	41084006	22498	+	41061674	41082914	11193	11193	WBP4	NM_007187 NP_009118 XM_005266245 XM_017020380 XP_005266302 XP_016875869	10
chr11	310204	327605	17402	*	3	4970	24824.3	TRUE	chr11	307631	309397	1767	+	308193	309272	10581	10581	IFITM2	NM_006435 NP_006426	6
chr11	310204	327605	17402	*	3	4970	24824.3	TRUE	chr11	308408	315272	6865	+	308408	315208	8519	8519	IFITM1	NM_003641 NP_003632	7
chr11	310204	327605	17402	*	3	4970	24824.3	TRUE	chr11	298200	299526	1327	-	298501	299490	387733	387733	IFITM5	NM_001025295 NP_001020466	2
chr11	310204	327605	17402	*	3	4970	24824.3	TRUE	chr11	369499	382117	12619	+	369804	381792	338707	338707	B4GALNT4	NM_178537 NP_848632 XM_017017654 XP_016873143 XR_001747858	19
chr11	310204	327605	17402	*	3	4970	24824.3	TRUE	chr11	319676	327537	7862	-	319676	320813	10410	10410	IFITM3	NM_021034 NP_066362 NR_049759	4
chr7	139756624	139778784	22161	*	3	2628	24796.4	TRUE	chr7	139777051	140020325	243275	+	139829388	140020099	6916	6916	TBXAS1	NM_001061 NM_001130966 NM_001166253 NM_001166254 NM_001314028 NM_001366537 NM_001366538 NM_030984 NP_001052 NP_001124438 NP_001159725 NP_001159726 NP_001300957 NP_001353466 NP_001353467 NP_112246 NR_159363 NR_159364 NR_159365 XM_011516544 XM_017012570 XM_017012571 XM_017012572 XM_024446901 XP_011514846 XP_016868059 XP_016868060 XP_016868061 XP_024302669	26
chr7	139756624	139778784	22161	*	3	2628	24796.4	TRUE	chr7	139561570	139777998	216429	-	139572927	139777623	28996	28996	HIPK2	NM_001113239 NM_022740 NP_001106710 NP_073577 XM_006715935 XM_011516077 XM_011516078 XM_011516079 XM_011516080 XM_011516081 XM_017012069 XP_006715998 XP_011514379 XP_011514380 XP_011514381 XP_011514382 XP_011514383 XP_016867558	15
chr21	17775625	17820328	44704	*	7	7149	24769.3	TRUE	chr21	17788974	17819386	30413	-	17793415	17818318	54149	54149	C21orf91	NM_001100420 NM_001100421 NM_017447 NP_001093890 NP_001093891 NP_059143	8
chr20	5582973	5611354	28382	*	6	5988	24719.9	TRUE	chr20	5544439	5611006	66568	-	5547661	5604412	56261	56261	GPCPD1	NM_019593 NP_062539 XM_005260758 XM_005260761 XM_006723596 XM_024451948 XM_024451949 XP_005260815 XP_005260818 XP_006723659 XP_024307716 XP_024307717 XR_001754345	22
chr1	205273403	205322076	48674	*	9	6222	24686.1	TRUE	chr1	205302063	205321745	19683	-	205303450	205321628	81788	81788	NUAK2	NM_030952 NP_112214 XM_005245515 XP_005245572	7
chr6	139249608	139292608	43001	*	10	8709	24608.9	TRUE	chr6	139144204	139291998	147795	-	139242526	139288899	167838	167838	TXLNB	NM_153235 NP_694967 XM_005266836 XM_011535505 XM_011535506 XM_017010322 XM_024446341 XP_005266893 XP_011533807 XP_011533808 XP_016865811 XP_024302109 XR_942317	32
chr5	137734591	137755092	20502	*	3	4700	24400.3	TRUE	chr5	137617500	137736089	118590	-	137622098	137735646	26249	26249	KLHL3	NM_001257194 NM_001257195 NM_017415 NP_001244123 NP_001244124 NP_059111	21
chr5	137734591	137755092	20502	*	3	4700	24400.3	TRUE	chr5	137745651	137754363	8713	-	137753149	137754066	10949	10949	HNRNPA0	NM_006805 NP_006796	1
chr7	44623782	44639777	15996	*	4	4243	24283.6	TRUE	chr7	44565804	44575051	9248	-	44566002	44573895	54606	54606	DDX56	NM_001257189 NM_019082 NP_001244118 NP_061955	13
chr7	44623782	44639777	15996	*	4	4243	24283.6	TRUE	chr7	44577894	44582287	4394	-	44579479	44582206	222068	222068	TMED4	NM_001303058 NM_001303059 NM_001303060 NM_001303061 NM_001303062 NM_182547 NP_001289987 NP_001289988 NP_001289989 NP_001289990 NP_001289991 NP_872353	4
chr4	184438157	184481596	43440	*	8	5288	24234.6	TRUE	chr4	184387729	184474550	86822	-	184388758	184429064	3660	3660	IRF2	NM_002199 NP_002190 XM_024454034 XM_024454035 XM_024454036 XM_024454037 XM_024454038 XM_024454039 XP_024309802 XP_024309803 XP_024309804 XP_024309805 XP_024309806 XP_024309807	14
chr11	3825451	3867633	42183	*	5	5282	24220.9	TRUE	chr11	3671083	3797792	126710	-	3671382	3782117	4928	4928	NUP98	NM_001365125 NM_001365126 NM_001365127 NM_001365128 NM_001365129 NM_005387 NM_016320 NM_139131 NM_139132 NP_001352054 NP_001352055 NP_001352056 NP_001352057 NP_001352058 NP_005378 NP_057404 NP_624357 NP_624358 NR_157589 NR_157590 NR_157591	35
chr11	3825451	3867633	42183	*	5	5282	24220.9	TRUE	chr11	3854527	4093210	238684	+	3856271	4091798	6786	6786	STIM1	NM_001277961 NM_001277962 NM_001382566 NM_001382567 NM_001382568 NM_001382569 NM_001382570 NM_001382571 NM_001382572 NM_001382573 NM_001382574 NM_001382575 NM_001382576 NM_001382577 NM_001382578 NM_001382579 NM_001382580 NM_001382581 NM_003156 NP_001264890 NP_001264891 NP_001369495 NP_001369496 NP_001369497 NP_001369498 NP_001369499 NP_001369500 NP_001369501 NP_001369502 NP_001369503 NP_001369504…	27
chr11	3825451	3867633	42183	*	5	5282	24220.9	TRUE	chr11	3826978	3840959	13982	-	3827563	3828138	391	391	RHOG	NM_001665 NP_001656 XM_005252916 XM_017017719 XP_005252973 XP_016873208	5
chr15	68277378	68311205	33828	*	5	4471	24189.7	TRUE	chr15	68184032	68229718	45687	-	68194015	68229584	91860	91860	CALML4	NM_001031733 NM_001286694 NM_001286695 NM_033429 NP_001026903 NP_001273623 NP_001273624 NP_219501 NR_104583	10
chr15	68277378	68311205	33828	*	5	4471	24189.7	TRUE	chr15	68277745	68295862	18118	+	68278418	68291242	10116	10116	FEM1B	NM_015322 NP_056137	4
chr15	68277378	68311205	33828	*	5	4471	24189.7	TRUE	chr15	68206992	68257211	50220	-	68208140	68256868	54982	54982	CLN6	NM_017882 NP_060352	7
chr14	101875017	101918287	43271	*	6	7737	24101.4	TRUE	chr14	101964573	102056443	91871	+	101964692	102050573	1778	1778	DYNC1H1	NM_001376 NP_001367	62
chr8	85171971	85201282	29312	*	6	5503	24067.3	TRUE	chr8	85177154	85217158	40005	+	85177421	85214305	1875	1875	E2F5	NM_001083588 NM_001083589 NM_001951 NP_001077057 NP_001077058 NP_001942	9
chr8	85171971	85201282	29312	*	6	5503	24067.3	TRUE	chr8	85220587	85284073	63487	+	85245829	85281349	377677	377677	CA13	NM_198584 NP_940986	11
chr9	89310207	89319323	9117	*	3	3069	24036.2	TRUE	chr9	89311195	89316703	5509	+	89311293	89316425	1164	1164	CKS2	NM_001827 NP_001818	3
chr9	89310207	89319323	9117	*	3	3069	24036.2	TRUE	chr9	89318500	89359663	41164	+	89318577	89358824	79048	79048	SECISBP2	NM_001282688 NM_001282689 NM_001282690 NM_001354696 NM_001354697 NM_001354698 NM_001354702 NM_024077 NP_001269617 NP_001269618 NP_001269619 NP_001341625 NP_001341626 NP_001341627 NP_001341631 NP_076982 XM_006717282 XM_011519000 XM_011519001 XM_011519002 XM_011519003 XM_017015122 XM_024447666 XM_024447667 XM_024447668 XM_024447669 XP_006717345 XP_011517302 XP_011517303 XP_011517304 XP_011517305 XP…	19
chr15	34310078	34343267	33190	*	7	4286	23972.4	TRUE	chr15	34343315	34357737	14423	+	34343633	34357491	256646	256646	NUTM1	NM_001284292 NM_001284293 NM_175741 NP_001271221 NP_001271222 NP_786883	8
chr15	34310078	34343267	33190	*	7	4286	23972.4	TRUE	chr15	34229784	34338060	108277	-	34232500	34336680	9990	9990	SLC12A6	NM_001042494 NM_001042495 NM_001042496 NM_001042497 NM_001365088 NM_005135 NM_133647 NP_001035959 NP_001035960 NP_001035961 NP_001035962 NP_001352017 NP_005126 NP_598408 XM_006720793 XM_011522269 XP_006720856 XP_011520571 XR_931960	27
chr15	34310078	34343267	33190	*	7	4286	23972.4	TRUE	chr15	34341719	34343136	1418	-	34341968	34343073	55505	55505	NOP10	NM_018648 NP_061118	2
chr7	7902717	7945606	42890	*	8	5397	23927.8	TRUE	chr7	7968796	8094272	125477	+	7969351	8092694	113263	113263	GLCCI1	NM_138426 NP_612435	14
chr20	47335587	47358016	22430	*	6	4911	23910.3	TRUE	chr20	47209214	47356889	147676	-	47210658	47356670	23613	23613	ZMYND8	NM_001281769 NM_001281771 NM_001281772 NM_001281773 NM_001281774 NM_001281775 NM_001281776 NM_001281777 NM_001281778 NM_001281779 NM_001281780 NM_001281781 NM_001281782 NM_001281783 NM_001281784 NM_001363714 NM_001363741 NM_012408 NM_183047 NM_183048 NP_001268698 NP_001268700 NP_001268701 NP_001268702 NP_001268703 NP_001268704 NP_001268705 NP_001268706 NP_001268707 NP_001268708 NP_001268709 NP_00…	29
chr7	7750949	7790125	39177	*	7	6979	23775.9	TRUE	chr7	7636518	7718607	82090	-	7637000	7640418	6119	6119	RPA3	NM_002947 NP_002938	9
chr4	15756125	15833258	77134	*	10	8494	23760.8	TRUE	chr4	15778275	15853232	74958	+	15778415	15848602	952	952	CD38	NM_001775 NP_001766 NR_132660	8
chr11	123061711	123087894	26184	*	6	5437	23687.8	TRUE	chr11	123057489	123063230	5742	-	123057734	123061324	3312	3312	HSPA8	NM_006597 NM_153201 NP_006588 NP_694881 XM_011542798 XP_011541100	9
chr11	82900033	82946076	46044	*	7	6514	23532.6	TRUE	chr11	82899975	82958277	58303	+	82913655	82957439	220042	220042	DDIAS	NM_001363481 NM_145018 NP_001350410 NP_659455 XM_011544836 XM_011544837 XM_024448400 XP_011543138 XP_011543139 XP_024304168	12
chr2	201184100	201234757	50658	*	11	7327	23493.8	TRUE	chr2	201182898	201229406	46509	+	201185778	201229083	843	843	CASP10	NM_001206524 NM_001206542 NM_001230 NM_001306083 NM_032974 NM_032976 NM_032977 NP_001193453 NP_001193471 NP_001221 NP_001293012 NP_116756 NP_116758 NP_116759 XM_005246907 XM_006712796 XM_011511990 XP_005246964 XP_006712859 XP_011510292 XR_923043 XR_923044	12
chr2	201184100	201234757	50658	*	11	7327	23493.8	TRUE	chr2	201233443	201287711	54269	+	201258232	201286594	841	841	CASP8	NM_001080124 NM_001080125 NM_001228 NM_001372051 NM_001400642 NM_001400645 NM_001400648 NM_001400651 NM_001400653 NM_001400654 NM_001400655 NM_001400656 NM_001400657 NM_001400658 NM_001400659 NM_001400660 NM_001400661 NM_001400662 NM_001400663 NM_001400664 NM_001400665 NM_001400666 NM_001400667 NM_001400668 NM_001400669 NM_001400670 NM_001400671 NM_001400672 NM_001400673 NM_001400674 NM_001400675…	16
chr20	25033623	25058636	25014	*	6	4687	23452.2	TRUE	chr20	24962925	24992751	29827	-	24963813	24992688	57136	57136	APMAP	NM_020531 NP_065392 XM_005260763 XP_005260820	10
chr20	25033623	25058636	25014	*	6	4687	23452.2	TRUE	chr20	25006230	25058980	52751	-	25006860	25058102	84532	84532	ACSS1	NM_001252675 NM_001252676 NM_001252677 NM_032501 NP_001239604 NP_001239605 NP_001239606 NP_115890 XM_006723659 XM_011529388 XP_006723722 XP_011527690 XR_937170	16
chr19	14366609	14419525	52917	*	8	6970	23425.9	TRUE	chr19	14408798	14419383	10586	-	14408936	14413220	10212	10212	DDX39A	NM_001204057 NM_005804 NM_138998 NP_005795 NR_038336 NR_046366 XM_006722606 XM_011527620 XM_011527621 XM_024451310 XM_024451311 XM_024451312 XP_006722669 XP_011525922 XP_011525923 XP_024307078 XP_024307079 XP_024307080	10
chr19	14366609	14419525	52917	*	8	6970	23425.9	TRUE	chr19	14433053	14471867	38815	+	14433522	14471862	5585	5585	PKN1	NM_002741 NM_213560 NP_002732 NP_998725	22
chr19	14366609	14419525	52917	*	8	6970	23425.9	TRUE	chr19	14380501	14408725	28225	+	14381524	14408121	976	976	ADGRE5	NM_001025160 NM_001784 NM_078481 NP_001020331 NP_001775 NP_510966	21
chr12	57741844	57783333	41490	*	9	7890	23345.9	TRUE	chr12	57738013	57750219	12207	+	57745155	57747290	6302	6302	TSPAN31	NM_001330168 NM_001330169 NM_005981 NP_001317097 NP_001317098 NP_005972 XM_024449123 XP_024304891	7
chr12	57741844	57783333	41490	*	9	7890	23345.9	TRUE	chr12	57755103	57760411	5309	+	57755529	57758897	92979	92979	MARCHF9	NM_138396 NP_612405	3
chr12	57741844	57783333	41490	*	9	7890	23345.9	TRUE	chr12	57771492	57782541	11050	+	57771575	57780646	25895	25895	EEF1AKMT3	NM_015433 NM_206914 NP_056248 NP_996797	6
chr12	57741844	57783333	41490	*	9	7890	23345.9	TRUE	chr12	57772660	57808071	35412	+	57772725	57807895	10102	10102	TSFM	NM_001172695 NM_001172696 NM_001172697 NM_005726 NP_001166166 NP_001166167 NP_001166168 NP_005717	13
chr12	57741844	57783333	41490	*	9	7890	23345.9	TRUE	chr12	57723761	57742157	18397	-	57726552	57742071	116986	116986	AGAP2	NM_001122772 NM_014770 NP_001116244 NP_055585 XM_005268625 XM_005268626 XM_017018772 XP_005268682 XP_005268683 XP_016874261	20
chr12	57741844	57783333	41490	*	9	7890	23345.9	TRUE	chr12	57747727	57756013	8287	-	57748525	57751717	1019	1019	CDK4	NM_000075 NM_052984 NP_000066	10
chr12	57741844	57783333	41490	*	9	7890	23345.9	TRUE	chr12	57762334	57768986	6653	-	57763142	57768986	1594	1594	CYP27B1	NM_000785 NP_000776	8
chr12	57741844	57783333	41490	*	9	7890	23345.9	TRUE	chr12	57768471	57772119	3649	-	57768996	57772083	4234	4234	METTL1	NM_005371 NM_023032 NM_023033 NP_005362 NP_075422 XM_005268873 XM_017019305 XP_005268930 XP_016874794	7
chr11	72069371	72113319	43949	*	5	5329	23332	TRUE	chr11	72080331	72110782	30452	+	72089084	72108925	220074	220074	LRTOMT	NM_001145308 NM_001145309 NM_001145310 NP_001138780 NP_001138781 NP_001138782 NR_073187 NR_073188	10
chr11	72069371	72113319	43949	*	5	5329	23332	TRUE	chr11	72080337	72096895	16559	+	72088353	72096762	120356739	120356739	LRRC51	NM_001145307 NM_001205138 NM_001271471 NM_001318803 NM_145309 NP_001138779 NP_001192067 NP_001258400 NP_001305732 NP_660352 NR_026886 NR_134858	9
chr11	72069371	72113319	43949	*	5	5329	23332	TRUE	chr11	72105924	72109329	3406	+	72105952	72108925	120356740	120356740	TOMT	NM_001393500 NP_001380429	3
chr11	72069371	72113319	43949	*	5	5329	23332	TRUE	chr11	72114869	72139892	25024	+	72135953	72139831	2352	2352	FOLR3	NM_000804 NM_001318045 NP_000795 NP_001304974 XM_011544876 XP_011543178	7
chr11	72069371	72113319	43949	*	5	5329	23332	TRUE	chr11	72002864	72080693	77830	-	72003527	72035943	4926	4926	NUMA1	NM_001286561 NM_006185 NP_001273490 NP_006176 NR_104476 XM_006718564 XM_011545054 XM_011545055 XM_011545056 XM_011545057 XM_011545058 XM_011545059 XM_011545060 XM_011545061 XM_011545062 XM_011545063 XM_011545064 XM_011545065 XM_011545066 XM_017017830 XM_017017831 XM_024448555 XM_024448556 XP_006718627 XP_011543356 XP_011543357 XP_011543358 XP_011543359 XP_011543360 XP_011543361 XP_011543362 XP_01…	38
chr11	72069371	72113319	43949	*	5	5329	23332	TRUE	chr11	72085895	72103297	17403	-	72086409	72103224	55004	55004	LAMTOR1	NM_017907 NP_060377	7
chr11	72069371	72113319	43949	*	5	5329	23332	TRUE	chr11	72106378	72112780	6403	-	72107351	72111276	25906	25906	ANAPC15	NM_001278485 NM_001278486 NM_001278487 NM_001278488 NM_001278489 NM_001278490 NM_001278491 NM_001278492 NM_001278493 NM_001278494 NM_001330321 NM_001393427 NM_001393428 NM_001393429 NM_001393430 NM_001393431 NM_001393432 NM_001393433 NM_001393434 NM_001393435 NM_001393436 NM_001393437 NM_001393438 NM_001393439 NM_001393440 NM_001393441 NM_001393442 NM_001393443 NM_001393444 NM_001393445 NM_001393…	10
chr7	131106083	131125051	18969	*	5	3854	23076.5	TRUE	chr7	131110096	131496632	386537	+	131327900	131487728	4289	4289	MKLN1	NM_001145354 NM_001321316 NM_013255 NP_001138826 NP_001308245 NP_037387 XM_006715993 XM_011516224 XM_024446766 XM_024446767 XP_006716056 XP_011514526 XP_024302534 XP_024302535	23
chr8	125417696	125435087	17392	*	6	3167	23043.3	TRUE	chr8	125430358	125438403	8046	+	125430903	125436471	10221	10221	TRIB1	NM_001282985 NM_025195 NP_001269914 NP_079471 XR_428373	5
chr22	39496289	39532995	36707	*	8	6609	23018.3	TRUE	chr22	39499432	39518132	18701	+	39511295	39515373	54471	54471	MIEF1	NM_001304564 NM_001394030 NM_013298 NM_019008 NP_001291493 NP_001380959 NP_061881 NR_130789 NR_130790 XM_011530236 XM_011530237 XM_011530238 XM_017028838 XP_011528538 XP_011528539 XP_011528540 XP_016884327	14
chr22	39496289	39532995	36707	*	8	6609	23018.3	TRUE	chr22	39519695	39522683	2989	+	39521446	39522602	468	468	ATF4	NM_001675 NM_182810 NP_001666 NP_877962 XM_017028807 XP_016884296	2
chr22	39496289	39532995	36707	*	8	6609	23018.3	TRUE	chr22	39570753	39689735	118983	+	39570753	39686405	8911	8911	CACNA1I	NM_001003406 NM_021096 NP_001003406 NP_066919 XM_017029035 XM_017029036 XM_017029037 XP_016884524 XP_016884525 XP_016884526	38
chr22	39496289	39532995	36707	*	8	6609	23018.3	TRUE	chr22	39529093	39532761	3669	-	39529492	39532738	91582	91582	RPS19BP1	NM_194326 NP_919307 NR_130151	1
chr14	55065582	55104089	38508	*	7	6138	23011.8	TRUE	chr14	54938949	55027105	88157	-	54941490	55026787	11169	11169	WDHD1	NM_001008396 NM_007086 NP_001008397 NP_009017 XM_006720012 XM_011536373 XM_017020940 XM_017020941 XP_006720075 XP_011534675 XP_016876429 XP_016876430	25
chr14	55065582	55104089	38508	*	7	6138	23011.8	TRUE	chr14	55124110	55145423	21314	+	55137374	55145271	3958	3958	LGALS3	NM_001177388 NM_001357678 NM_002306 NP_001344607 NP_002297 NR_003225	7
chr3	122563588	122621324	57737	*	8	5919	22932.7	TRUE	chr3	122421902	122514945	93044	-	122426985	122496565	3836	3836	KPNA1	NM_002264 NP_002255 NR_026698 XM_005247437 XM_011512795 XM_011512797 XM_017006363 XM_017006364 XM_024453514 XP_005247494 XP_011511097 XP_011511099 XP_016861852 XP_016861853 XP_024309282	18
chr3	122563588	122621324	57737	*	8	5919	22932.7	TRUE	chr3	122564338	122575203	10866	+	122564427	122571747	151636	151636	DTX3L	NM_138287 NP_612144	5
chr3	122563588	122621324	57737	*	8	5919	22932.7	TRUE	chr3	122577628	122639047	61420	+	122577668	122636100	165631	165631	PARP15	NM_001113523 NM_001308320 NM_001308321 NM_152615 NP_001106995 NP_001295249 NP_001295250 NP_689828 XM_005247159 XM_005247160 XM_011512475 XM_011512476 XM_011512477 XM_011512478 XM_011512479 XM_011512480 XM_017005791 XM_017005792 XP_005247216 XP_005247217 XP_011510777 XP_011510778 XP_011510779 XP_011510780 XP_011510781 XP_011510782 XP_016861280 XP_016861281	15
chr3	122563588	122621324	57737	*	8	5919	22932.7	TRUE	chr3	122527924	122564577	36654	-	122528364	122559620	83666	83666	PARP9	NM_001146102 NM_001146103 NM_001146104 NM_001146105 NM_001146106 NM_001387871 NM_001387872 NM_001387873 NM_001387874 NM_001387875 NM_001387876 NM_001387877 NM_001387878 NM_001387879 NM_001387880 NM_001387881 NM_001387882 NM_001387883 NM_001387884 NM_001387885 NM_001387886 NM_001387887 NM_031458 NP_001139574 NP_001139575 NP_001139576 NP_001139577 NP_001139578 NP_001374800 NP_001374801 NP_001374802…	11
chr17	76452107	76506868	54762	*	6	6300	22830.4	TRUE	chr17	76453351	76470117	16767	+	76466173	76469970	15	15	AANAT	NM_001088 NM_001166579 NP_001079 NP_001160051 NR_110548 XM_017024259 XP_016879748	8
chr17	76452107	76506868	54762	*	6	6300	22830.4	TRUE	chr17	76389456	76453152	63697	-	76390943	76453141	63893	63893	UBE2O	NM_022066 NP_071349 XM_005257567 XM_017024935 XM_024450865 XM_024450866 XM_024450867 XP_005257624 XP_016880424 XP_024306633 XP_024306634 XP_024306635	18
chr17	76452107	76506868	54762	*	6	6300	22830.4	TRUE	chr17	76527586	76553578	25993	+	76540142	76542574	768206	768206	PRCD	NM_001077620 NP_001071088 NR_033357 XM_017025013 XM_017025014 XM_017025015 XP_016880502 XP_016880503 XP_016880504	9
chr17	76452107	76506868	54762	*	6	6300	22830.4	TRUE	chr17	76470891	76501790	30900	-	76471633	76481524	79651	79651	RHBDF2	NM_001005498 NM_001376228 NM_001376229 NM_001376230 NM_024599 NP_001005498 NP_001363157 NP_001363158 NP_001363159 NP_078875 NR_164785 NR_164786 NR_164787 XM_005257669 XM_011525249 XM_011525250 XM_011525251 XP_005257726 XP_011523551 XP_011523552 XP_011523553 XR_001752625	19
chr19	45691869	45731002	39134	*	5	5845	22720.6	TRUE	chr19	45710629	45730896	20268	-	45711684	45713495	23403	23403	FBXO46	NM_001080469 NM_001329632 NM_001329633 NM_001329634 NP_001073938 NP_001316561 NP_001316562 NP_001316563	4
chr19	45691869	45731002	39134	*	5	5845	22720.6	TRUE	chr19	45606994	45645602	38609	-	45607009	45645444	24139	24139	EML2	NM_001193268 NM_001193269 NM_001352051 NM_001352052 NM_001352053 NM_001352054 NM_012155 NP_001180197 NP_001180198 NP_001338980 NP_001338981 NP_001338982 NP_001338983 NP_036287 NR_147899 NR_147900 NR_147901 NR_147902 NR_147903	30
chr19	45691869	45731002	39134	*	5	5845	22720.6	TRUE	chr19	45733439	45764541	31103	+	45735377	45764118	388553	388553	MEIOSIN	NM_001310124 NP_001297053 NR_038267 XM_011527571 XM_011527573 XM_011527574 XP_011525873 XP_011525875 XP_011525876	15
chr19	45691869	45731002	39134	*	5	5845	22720.6	TRUE	chr19	45692403	45703989	11587	+	45692704	45703049	54814	54814	QPCTL	NM_001163377 NM_017659 NP_001156849 NP_060129 XM_011527048 XM_017026900 XP_011525350 XP_016882389 XR_001753711	7
chr19	45691869	45731002	39134	*	5	5845	22720.6	TRUE	chr19	45687460	45692316	4857	-	45687553	45691888	6633	6633	SNRPD2	NM_001369751 NM_001369752 NM_001384647 NM_004597 NM_177542 NP_001356680 NP_001356681 NP_001371576 NP_004588 NP_808210	7
chr8	51870355	51909735	39381	*	6	6033	22659.3	TRUE	chr8	51817575	51899186	81612	-	51820351	51899111	115294	115294	PCMTD1	NM_001286782 NM_001286783 NM_001363193 NM_052937 NP_001273711 NP_001273712 NP_001350122 NP_443169 XR_001745466	10
chr2	64905200	64946807	41608	*	9	5635	22616.7	TRUE	chr2	64988477	65023865	35389	+	64989644	65021146	6509	6509	SLC1A4	NM_001135581 NM_001193493 NM_001348406 NM_001348407 NM_003038 NP_001180422 NP_001335335 NP_001335336 NP_003029	10
chr3	52685398	52716329	30932	*	5	5405	22489.9	TRUE	chr3	52681156	52694497	13342	+	52686093	52694275	26354	26354	GNL3	NM_014366 NM_206825 NM_206826 NP_055181 NP_996561 NP_996562	14
chr3	52685398	52716329	30932	*	5	5405	22489.9	TRUE	chr3	52704955	52711148	6194	+	52706046	52707812	28972	28972	SPCS1	NM_014041 NP_054760	4
chr3	52685398	52716329	30932	*	5	5405	22489.9	TRUE	chr3	52545352	52685917	140566	-	52548063	52679711	55193	55193	PBRM1	NM_001350074 NM_001350075 NM_001350076 NM_001350077 NM_001350078 NM_001350079 NM_001366070 NM_001366071 NM_001366072 NM_001366073 NM_001366074 NM_001366075 NM_001366076 NM_001394867 NM_001394868 NM_001394869 NM_001394870 NM_001394871 NM_001394872 NM_001394873 NM_001394874 NM_001394875 NM_001394876 NM_001394877 NM_001394878 NM_001394879 NM_001394880 NM_001394881 NM_001400470 NM_001400471 NM_001400…	36
chr3	52685398	52716329	30932	*	5	5405	22489.9	TRUE	chr3	52694486	52706032	11547	-	52694845	52700460	55830	55830	GLT8D1	NM_001010983 NM_001278280 NM_001278281 NM_018446 NM_152932 NP_001010983 NP_001265209 NP_001265210 NP_060916 NP_690909 XM_024453641 XP_024309409 XR_002959551	13
chr17	8155949	8190453	34505	*	6	5825	22420.7	TRUE	chr17	8095900	8119047	23148	-	8096627	8117990	59344	59344	ALOXE3	NM_001165960 NM_001369446 NM_021628 NP_001159432 NP_001356375 NP_067641 XM_017024921 XM_017024922 XM_017024923 XM_017024924 XM_017024925 XP_016880410 XP_016880411 XP_016880412 XP_016880413 XP_016880414 XR_001752579 XR_001752580	16
chr17	8155949	8190453	34505	*	6	5825	22420.7	TRUE	chr17	8120592	8124106	3515	-	8121571	8124084	84667	84667	HES7	NM_001165967 NM_032580 NP_001159439 NP_115969 XM_017025232 XM_024451007 XP_016880721 XP_024306775	5
chr17	8155949	8190453	34505	*	6	5825	22420.7	TRUE	chr17	8140472	8156506	16035	-	8141068	8156354	5187	5187	PER1	NM_002616 NP_002607	22
chr17	8155949	8190453	34505	*	6	5825	22420.7	TRUE	chr17	8150816	8163546	12731	-	8150816	8162879	6844	6844	VAMP2	NM_001330125 NM_014232 NP_001317054 NP_055047	6
chr17	8155949	8190453	34505	*	6	5825	22420.7	TRUE	chr17	8172457	8176399	3943	-	8174203	8176286	84314	84314	TMEM107	NM_001351278 NM_001351279 NM_001351280 NM_032354 NM_183065 NP_001338207 NP_001338208 NP_001338209 NP_115730 NP_898888 NR_147092	1
chr17	8155949	8190453	34505	*	6	5825	22420.7	TRUE	chr17	8188345	8190180	1836	-	8189067	8190140	54785	54785	BORCS6	NM_017622 NP_060092	1
chr3	13305286	13347249	41964	*	7	4700	22412.4	TRUE	chr3	12897043	13283281	386239	-	12899390	13282982	9922	9922	IQSEC1	NM_001134382 NM_001330619 NM_001376938 NM_014869 NP_001127854 NP_001317548 NP_001363867 NP_055684 XM_011534305 XM_011534306 XM_011534307 XM_011534308 XM_011534311 XM_011534312 XM_011534313 XM_011534314 XM_024453845 XM_024453846 XP_011532607 XP_011532608 XP_011532609 XP_011532610 XP_011532613 XP_011532614 XP_011532615 XP_011532616 XP_024309613 XP_024309614	24
chr7	105809066	105859438	50373	*	7	6039	22405.5	TRUE	chr7	105876796	106036432	159637	+	105963319	106032697	222256	222256	CDHR3	NM_001301161 NM_152750 NP_001288090 NP_689963 XM_005250224 XM_005250225 XM_006715905 XM_011515955 XM_011515956 XM_011515957 XM_011515958 XM_011515959 XM_017011862 XM_017011863 XM_017011864 XM_017011865 XM_017011866 XM_017011867 XM_024446689 XM_024446690 XP_005250281 XP_005250282 XP_006715968 XP_011514257 XP_011514258 XP_011514259 XP_011514260 XP_011514261 XP_016867351 XP_016867352 XP_016867353 XP…	26
chr19	48321279	48334152	12874	*	3	3956	22397.7	TRUE	chr19	48321509	48330553	9045	+	48326845	48330524	2014	2014	EMP3	NM_001313905 NM_001425 NP_001300834 NP_001416 XM_011526605 XP_011524907	7
chr19	48321279	48334152	12874	*	3	3956	22397.7	TRUE	chr19	48364367	48376377	12011	+	48365843	48376318	23546	23546	SYNGR4	NM_012451 NP_036583 XM_005258693 XM_005258694 XM_011526686 XM_017026541 XP_005258750 XP_005258751 XP_011524988 XP_016882030	7
chr19	48321279	48334152	12874	*	3	3956	22397.7	TRUE	chr19	48296457	48321971	25515	-	48296976	48320368	93233	93233	ODAD1	NM_001135193 NM_001135194 NM_001364171 NM_144577 NP_001351100 NP_653178	18
chr7	128932632	128941332	8701	*	3	3576	22393.8	TRUE	chr7	128937457	128950038	12582	+	128942082	128948818	3663	3663	IRF5	NM_001098627 NM_001098629 NM_001098630 NM_001242452 NM_001347928 NM_001364314 NM_032643 NP_001092097 NP_001092099 NP_001092100 NP_001229381 NP_001334857 NP_001351243 NP_116032 XM_006715974 XM_011516158 XM_011516159 XM_011516160 XP_006716037 XP_011514460 XP_011514461 XP_011514462	14
chr7	128932632	128941332	8701	*	3	3576	22393.8	TRUE	chr7	128862042	128910719	48678	-	128870427	128910676	375616	375616	KCP	NM_001135914 NM_001366122 NM_199349 NP_001353051 NP_955381 XM_017012184 XM_017012186 XM_017012187 XM_017012188 XM_017012189 XM_017012190 XM_017012191 XM_017012192 XM_017012193 XM_017012194 XP_016867673 XP_016867675 XP_016867676 XP_016867677 XP_016867678 XP_016867679 XP_016867680 XP_016867681 XP_016867682 XP_016867683	50
chr18	14172099	14238363	66265	*	11	9257	22337.6	TRUE	chr18	14057457	14132490	75034	-	14085054	14132277	162655	162655	ZNF519	NM_145287 NP_660330 NR_033354	12
chr7	150357345	150380128	22784	*	3	4228	22263.5	TRUE	chr7	150368189	150374044	5856	+	150368903	150372945	29803	29803	REPIN1	NM_001099695 NM_001099696 NM_001362745 NM_001362746 NM_001362747 NM_001388037 NM_001388038 NM_001388039 NM_001388040 NM_001388041 NM_001388042 NM_001388043 NM_001388044 NM_001388045 NM_001388046 NM_001388047 NM_001388048 NM_001388049 NM_001388050 NM_001388051 NM_001388052 NM_001388053 NM_001388054 NM_001388055 NM_001388056 NM_001388057 NM_001388058 NM_001388059 NM_001388060 NM_001388061 NM_001388…	5
chr7	150357345	150380128	22784	*	3	4228	22263.5	TRUE	chr7	149891191	150323725	432535	-	150248986	150323714	653857	653857	ACTR3C	NM_001164458 NM_001164459 NM_001351027 NM_001351028 NM_001351029 NM_001351030 NP_001157930 NP_001157931 NP_001337956 NP_001337957 NP_001337958 NP_001337959 NR_147012 NR_147013 NR_147014 NR_147015 NR_147016 NR_147017 NR_147018 NR_147019 NR_147020 NR_147021 NR_147022 XM_005250043 XM_011516502 XM_011516506 XM_011516507 XM_011516508 XM_011516511 XM_017012548 XM_017012549 XM_017012550 XM_024446879 XM_…	14
chr7	150357345	150380128	22784	*	3	4228	22263.5	TRUE	chr7	150368790	150398630	29841	+	150388471	150398095	285971	285971	ZNF775	NM_173680 NP_775951	5
chr7	150357345	150380128	22784	*	3	4228	22263.5	TRUE	chr7	150379329	150412470	33142	+	150407612	150410192	728743	728743	LOC728743	NM_001080852 NM_001395974 NM_001395975 NM_001395976 NM_001395977 NP_001382903 NP_001382904 NP_001382905 NP_001382906 NR_027237 NR_173085 NR_173086 NR_173087 NR_173088	10
chr7	150357345	150380128	22784	*	3	4228	22263.5	TRUE	chr7	150338317	150341662	3346	-	150338337	150340609	5919	5919	RARRES2	NM_002889 NP_002880 XM_017012491 XP_016867980	4
chr14	80930782	80960499	29718	*	6	4838	22243.2	TRUE	chr14	80954989	81146306	191318	+	80955681	81144353	7253	7253	TSHR	NM_000369 NM_001018036 NM_001142626 NP_000360 NP_001018046 NP_001136098 XM_005268037 XM_005268039 XM_006720245 XM_011537119 XP_005268094 XP_005268096 XP_006720308 XP_011535421	13
chr14	80930782	80960499	29718	*	6	4838	22243.2	TRUE	chr14	80476983	80959517	482535	-	80497479	80916547	145508	145508	CEP128	NM_152446 NP_689659 NR_157142 XM_011536490 XM_011536491 XM_011536492 XM_011536493 XM_011536495 XM_017021042 XM_017021043 XP_011534792 XP_011534793 XP_011534794 XP_011534795 XP_011534797 XP_016876531 XP_016876532	32
chr7	102571704	102623426	51723	*	7	5490	22172.8	TRUE	chr7	102538341	102567070	28730	-	102538417	102543636	107983993	107983993	UPK3BL2	NM_001363506 NP_001350435	9
chr7	102571704	102623426	51723	*	7	5490	22172.8	TRUE	chr7	102543568	102572583	29016	-	102545417	102572521	548644	548644	POLR2J3	NM_001015884 NM_001097615 NP_001091084	7
chr7	102571704	102623426	51723	*	7	5490	22172.8	TRUE	chr7	102537918	102572653	34736	-	102540024	102572521	123258399	123258399	POLR2J3-UPK3BL2	NR_173351	11
chr7	102571704	102623426	51723	*	7	5490	22172.8	TRUE	chr7	102650319	102662625	12307	+	102652349	102660265	100310812	100310812	SPDYE2B	NM_001166339 NP_001159811 XM_005250093 XM_011515702 XP_005250150 XP_011514004	9
chr1	21773610	21798520	24911	*	5	4523	22157.4	TRUE	chr1	21812265	21825225	12961	+	21812452	21822215	401944	401944	LDLRAD2	NM_001013693 NP_001013715	5
chr1	21773610	21798520	24911	*	5	4523	22157.4	TRUE	chr1	21678298	21783606	105309	-	21679417	21782957	84196	84196	USP48	NM_001032730 NM_001330394 NM_001350164 NM_001350166 NM_001350167 NM_001350168 NM_032236 NP_001027902 NP_001317323 NP_001337093 NP_001337095 NP_001337096 NP_001337097 NP_115612 XM_006710955 XM_011542264 XM_011542265 XM_011542267 XM_011542268 XM_017002496 XM_017002497 XM_024450167 XP_006711018 XP_011540566 XP_011540567 XP_011540569 XP_011540570 XP_016857985 XP_016857986 XP_024305935 XR_001737479 XR…	30
chr5	96922100	96937014	14915	*	2	4349	22138.3	TRUE	chr5	96935394	97037513	102120	+	96936156	97028533	4012	4012	LNPEP	NM_005575 NM_175920 NP_005566 NP_787116 XM_024446045 XP_024301813	20
chr5	96922100	96937014	14915	*	2	4349	22138.3	TRUE	chr5	96760810	96935809	175000	-	96763200	96803926	51752	51752	ERAP1	NM_001040458 NM_001198541 NM_001349244 NM_016442 NP_001035548 NP_001185470 NP_001336173 NP_057526 XM_005272015 XM_005272016 XM_011543480 XM_011543481 XM_011543484 XM_011543485 XM_011543486 XM_017009581 XM_017009583 XM_024446113 XP_005272072 XP_005272073 XP_011541782 XP_011541783 XP_011541786 XP_011541787 XP_011541788 XP_016865070 XP_016865072 XP_024301881 XR_001742119	29
chr8	123022132	123042640	20509	*	6	4712	22128.1	TRUE	chr8	123041968	123165173	123206	+	123072770	123151939	93594	93594	TBC1D31	NM_001145088 NM_001330606 NM_001363148 NM_001363149 NM_001363150 NM_001363151 NM_001363152 NM_001363153 NM_001363154 NM_001363155 NM_001363156 NM_145647 NP_001138560 NP_001317535 NP_001350077 NP_001350078 NP_001350079 NP_001350080 NP_001350081 NP_001350082 NP_001350083 NP_001350084 NP_001350085 NP_663622 XM_005251104 XM_011517379 XM_017013984 XP_005251161 XP_011515681 XP_016869473 XR_001745622 XR…	27
chr8	123022132	123042640	20509	*	6	4712	22128.1	TRUE	chr8	123013170	123042302	29133	-	123015447	123042122	79139	79139	DERL1	NM_001134671 NM_001330601 NM_001363963 NM_024295 NP_001128143 NP_001317530 NP_001350892 NP_077271	9
chr2	156332182	156351021	18840	*	5	5338	22118.9	TRUE	chr2	156324437	156342348	17912	-	156325744	156330186	4929	4929	NR4A2	NM_006186 NM_173171 NM_173172 NM_173173 NP_006177 NP_775265 XM_005246621 XM_006712553 XM_011511246 XM_017004219 XM_017004220 XP_005246678 XP_006712616 XP_011509548 XP_016859708 XP_016859709 XR_001738751 XR_001738752 XR_427087	10
chr15	85271227	85331757	60531	*	8	7304	22093.5	TRUE	chr15	85380571	85749358	368788	+	85485721	85744677	11214	11214	AKAP13	NM_001270546 NM_006738 NM_007200 NM_032162 NM_144767 NP_001257475 NP_006729 NP_009131	47
chr7	139797973	139860601	62629	*	7	7183	22063.8	TRUE	chr7	139561570	139777998	216429	-	139572927	139777623	28996	28996	HIPK2	NM_001113239 NM_022740 NP_001106710 NP_073577 XM_006715935 XM_011516077 XM_011516078 XM_011516079 XM_011516080 XM_011516081 XM_017012069 XP_006715998 XP_011514379 XP_011514380 XP_011514381 XP_011514382 XP_011514383 XP_016867558	15
chr22	24426726	24444912	18187	*	5	3779	21975	TRUE	chr22	24494107	24528390	34284	+	24495404	24525794	51733	51733	UPB1	NM_016327 NP_057411 XM_011530222 XM_011530223 XM_011530224 XM_011530225 XM_017028825 XM_017028826 XM_017028827 XM_017028828 XP_011528524 XP_011528525 XP_011528526 XP_011528527 XP_016884314 XP_016884315 XP_016884316 XP_016884317 XR_001755249 XR_001755250 XR_937867	12
chr3	195946131	195990660	44530	*	7	4372	21952.8	TRUE	chr3	195863364	195911945	48582	-	195864181	195896226	10188	10188	TNK2	NM_001010938 NM_001308046 NM_001382271 NM_001382272 NM_001382273 NM_001382274 NM_001382275 NM_001386164 NM_001387707 NM_001387708 NM_001387709 NM_001387710 NM_001387711 NM_001387712 NM_001387713 NM_001387714 NM_001387715 NM_001387716 NM_001387717 NM_001387718 NM_001387719 NM_001387720 NM_001387721 NM_005781 NP_001010938 NP_001294975 NP_001369200 NP_001369201 NP_001369202 NP_001369203 NP_001369204…	25
chr2	218870839	218909514	38676	*	6	4608	21941.8	TRUE	chr2	218822383	218832086	9704	-	218823762	218831770	53632	53632	PRKAG3	NM_017431 NP_059127 XM_017004343 XP_016859832	13
chr2	218870839	218909514	38676	*	6	4608	21941.8	TRUE	chr2	218880852	218893928	13077	+	218880996	218893271	80326	80326	WNT10A	NM_025216 NP_079492 XM_011511929 XM_011511930 XP_011510231 XP_011510232	4
chr12	108616726	108646268	29543	*	4	2479	21881.4	TRUE	chr12	108589851	108598320	8470	-	108591532	108592383	338773	338773	TMEM119	NM_181724 NP_859075 XM_011538271 XP_011536573	4
chr12	108616726	108646268	29543	*	4	2479	21881.4	TRUE	chr12	108621895	108633894	12000	-	108623069	108631901	6404	6404	SELPLG	NM_001206609 NM_003006 NP_001193538 NP_002997	3
chr14	103318747	103335186	16440	*	3	3645	21847.4	TRUE	chr14	103333544	103345025	11482	+	103335861	103341052	1983	1983	EIF5	NM_001969 NM_183004 NP_001960 NP_892116	11
chr5	109398992	109413767	14776	*	3	2891	21836	TRUE	chr5	109334713	109409974	75262	-	109337231	109383433	9867	9867	PJA2	NM_014819 NP_055634 XM_017010099 XP_016865588	12
chr9	105244308	105264744	20437	*	6	4010	21825.6	TRUE	chr9	105244622	105439171	194550	+	105244869	105438295	23446	23446	SLC44A1	NM_001286730 NM_001330731 NM_022109 NM_080546 NP_001273659 NP_001317660 NP_536856 XM_005251855 XM_006717027 XM_006717028 XM_006717029 XM_017014560 XP_005251912 XP_006717090 XP_006717091 XP_006717092 XP_016870049	20
chr22	24140361	24163294	22934	*	6	4672	21802.4	TRUE	chr22	24181487	24189106	7620	+	24181520	24188436	56241	56241	SUSD2	NM_019601 NP_062547	12
chr2	240560253	240586769	26517	*	7	6801	21782.9	TRUE	chr2	240560054	240565256	5203	+	240560685	240561467	285193	285193	DUSP28	NM_001033575 NM_001370465 NP_001028747 NP_001357394 XR_002959284 XR_002959285	2
chr2	240560253	240586769	26517	*	7	6801	21782.9	TRUE	chr2	240565804	240581372	15569	+	240568587	240577892	57140	57140	RNPEPL1	NM_018226 NP_060696	7
chr2	240560253	240586769	26517	*	7	6801	21782.9	TRUE	chr2	240586734	240599109	12376	+	240586912	240598680	11132	11132	CAPN10	NM_021251 NM_023083 NM_023084 NM_023085 NM_023086 NM_023087 NM_023088 NM_023089 NP_075571 NP_075573	11
chr2	240560253	240586769	26517	*	7	6801	21782.9	TRUE	chr2	240586772	240633159	46388	+	240586912	240630882	2859	2859	GPR35	NM_001195381 NM_001195382 NM_001394730 NM_005301 NP_001182310 NP_001182311 NP_001381659 NP_005292	13
chr2	240560253	240586769	26517	*	7	6801	21782.9	TRUE	chr2	240479422	240569209	89788	-	240479609	240561040	51281	51281	ANKMY1	NM_001282771 NM_001282780 NM_001282781 NM_001308375 NM_001354023 NM_001354024 NM_001354026 NM_001393462 NM_001393463 NM_001393464 NM_001393465 NM_001393466 NM_001393467 NM_001393468 NM_001393469 NM_001393470 NM_001393471 NM_001393472 NM_001393473 NM_001393474 NM_001393475 NM_001393476 NM_001393477 NM_001393478 NM_001393479 NM_001393480 NM_001393481 NM_001393482 NM_001393483 NM_001393484 NM_001393…	21
chr2	43212658	43240684	28027	*	4	4948	21694.9	TRUE	chr2	43222402	43226606	4205	-	43224319	43226315	678	678	ZFP36L2	NM_006887 NP_008818	2
chr15	100595777	100628201	32425	*	5	4133	21633.3	TRUE	chr15	100602589	100651701	49113	+	100612217	100648462	140460	140460	ASB7	NM_024708 NM_198243 NP_078984 NP_937886	6
chr15	100595777	100628201	32425	*	5	4133	21633.3	TRUE	chr15	100559369	100603230	43862	-	100565249	100580842	55180	55180	LINS1	NM_001040614 NM_001040615 NM_001040616 NM_001352507 NM_001352508 NM_018148 NM_181739 NM_181740 NP_001035706 NP_001339436 NP_001339437 NR_148017 NR_148018 NR_148019 XM_005254941 XM_005254943 XM_017022399 XM_017022400 XM_024449979 XM_024449980 XP_005254998 XP_005255000 XP_016877888 XP_016877889 XP_024305747 XP_024305748 XR_001751346 XR_001751347 XR_001751348 XR_002957655 XR_931862	15
chr20	37270477	37316926	46450	*	6	5785	21622	TRUE	chr20	37289649	37317260	27612	+	37301264	37316415	63905	63905	MANBAL	NM_001003897 NM_001369742 NM_001369743 NM_001376529 NM_001376530 NM_001376531 NM_001376532 NM_001376533 NM_001387335 NM_001387336 NM_001387337 NM_001387338 NM_001387339 NM_022077 NP_001003897 NP_001356671 NP_001356672 NP_001363458 NP_001363459 NP_001363460 NP_001363461 NP_001363462 NP_001374264 NP_001374265 NP_001374266 NP_001374267 NP_001374268 NP_071360 XM_017028006 XM_017028007 XP_016883495 XP…	6
chr20	37270477	37316926	46450	*	6	5785	21622	TRUE	chr20	37251086	37261819	10734	-	37251213	37256889	2691	2691	GHRH	NM_001184731 NM_021081 NP_001171660 NP_066567	5
chr20	37270477	37316926	46450	*	6	5785	21622	TRUE	chr20	37344685	37406050	61366	+	37384154	37403379	6714	6714	SRC	NM_005417 NM_198291 NP_005408 NP_938033 XM_011529013 XM_017028024 XM_017028025 XM_017028026 XM_017028027 XP_011527315 XP_016883513 XP_016883514 XP_016883515 XP_016883516	21
chr7	114916242	114932984	16743	*	4	4079	21602.2	TRUE	chr7	114922094	115019917	97824	+	114923034	115015935	29969	29969	MDFIC	NM_001166345 NM_001166346 NM_199072 NP_001159817 NP_001159818 NP_951038	9
chr1	157497362	157562851	65490	*	9	7351	21598.3	TRUE	chr1	157513377	157552515	39139	-	157515675	157552362	83416	83416	FCRL5	NM_001195388 NM_031281 NP_001182317 NP_112571 XM_011510030 XM_011510031 XM_011510032 XM_011510033 XP_011508332 XP_011508333 XP_011508334 XP_011508335	18
chr7	22335150	22357227	22078	*	5	4894	21560.4	TRUE	chr7	22118236	22357154	238919	-	22122406	22357060	9771	9771	RAPGEF5	NM_001367600 NM_001367601 NM_001367602 NM_001367603 NM_012294 NP_001354529 NP_001354530 NP_001354531 NP_001354532 NP_036426 XM_005249916 XM_011515652 XM_017012837 XP_005249973 XP_011513954 XP_016868326	31
chr8	119854756	119956601	101846	*	9	9750	21547.8	TRUE	chr8	119873717	120050918	177202	+	119873847	120049704	64798	64798	DEPTOR	NM_001283012 NM_022783 NP_001269941 NP_073620	10
chr8	119854756	119956601	101846	*	9	9750	21547.8	TRUE	chr8	119730774	119832863	102090	-	119731924	119832564	6873	6873	TAF2	NM_003184 NP_003175 XM_006716621 XM_011517259 XM_017013779 XM_017013780 XM_017013781 XM_017013782 XM_017013783 XM_017013785 XM_017013786 XM_017013790 XM_017013791 XM_024447240 XM_024447241 XM_024447242 XM_024447243 XP_006716684 XP_011515561 XP_016869268 XP_016869269 XP_016869270 XP_016869271 XP_016869272 XP_016869274 XP_016869275 XP_016869279 XP_016869280 XP_024303008 XP_024303009 XP_024303010 XP…	30
chr8	119854756	119956601	101846	*	9	9750	21547.8	TRUE	chr8	119833976	119855894	21919	-	119834893	119855795	79075	79075	DSCC1	NM_024094 NP_076999 XM_005251065 XP_005251122	9
chr3	115137780	115166001	28222	*	6	4515	21493.1	TRUE	chr3	114314500	115147288	832789	-	114339005	114380787	26137	26137	ZBTB20	NM_001164342 NM_001164343 NM_001164344 NM_001164345 NM_001164346 NM_001164347 NM_001348800 NM_001348801 NM_001348802 NM_001348803 NM_001348804 NM_001348805 NM_001393393 NM_001393394 NM_001393395 NM_001393396 NM_015642 NP_001157814 NP_001157815 NP_001157816 NP_001157817 NP_001157818 NP_001157819 NP_001335729 NP_001335730 NP_001335731 NP_001335732 NP_001335733 NP_001335734 NP_001380322 NP_001380323…	36
chr15	56886595	56932269	45675	*	5	5557	21485	TRUE	chr15	56918623	57299281	380659	+	56919914	57282587	6938	6938	TCF12	NM_001306219 NM_001306220 NM_001322151 NM_001322152 NM_001322154 NM_001322156 NM_001322157 NM_001322158 NM_001322159 NM_001322161 NM_001322162 NM_001322164 NM_001322165 NM_003205 NM_207036 NM_207037 NM_207038 NM_207040 NP_001293148 NP_001293149 NP_001309080 NP_001309081 NP_001309083 NP_001309085 NP_001309086 NP_001309087 NP_001309088 NP_001309090 NP_001309091 NP_001309093 NP_001309094 NP_003196 N…	34
chr15	56886595	56932269	45675	*	5	5557	21485	TRUE	chr15	56630176	56918571	288396	-	56631498	56707109	54816	54816	ZNF280D	NM_001002843 NM_001002844 NM_001288588 NM_001288589 NM_017661 NP_001002843 NP_001002844 NP_001275517 NP_001275518 NP_060131 XM_005254481 XM_005254483 XM_005254484 XM_005254485 XM_011521701 XM_011521702 XM_011521704 XM_011521707 XM_011521708 XM_011521709 XM_011521710 XM_011521711 XM_017022344 XM_017022345 XM_017022346 XM_017022347 XM_017022348 XM_017022349 XP_005254538 XP_005254540 XP_005254541 XP…	32
chr5	91373771	91392302	18532	*	5	3379	21466.3	TRUE	chr5	91368631	91383317	14687	-	91371400	91383092	57561	57561	ARRDC3	NM_001329670 NM_001329671 NM_001329672 NM_020801 NP_001316599 NP_001316600 NP_001316601 NP_065852 NR_138071 NR_138072 XR_002956165	10
chr5	131250856	131289912	39057	*	11	6235	21398.8	TRUE	chr5	131155383	131224468	69086	-	131155625	131165205	3094	3094	HINT1	NM_005340 NP_005331 NR_024610 NR_024611 NR_073488 NR_134494 NR_134495	7
chr15	67065059	67101849	36791	*	6	6208	21367.6	TRUE	chr15	67063763	67195173	131411	+	67066155	67190536	4088	4088	SMAD3	NM_001145102 NM_001145103 NM_001145104 NM_005902 NP_001138574 NP_001138575 NP_001138576 NP_005893 XM_011521559 XM_011521560 XP_011519861 XP_011519862	19
chr1	206634502	206740169	105668	*	12	9130	21238.9	TRUE	chr1	206635536	206684419	48884	+	206635704	206648965	8444	8444	DYRK3	NM_001004023 NM_003582 NP_001004023 NP_003573 XM_005273315 XM_011510061 XP_005273372 XP_011508363	6
chr1	206634502	206740169	105668	*	12	9130	21238.9	TRUE	chr1	206571292	206612465	41174	-	206581112	206612342	1939	1939	EIF2D	NM_001201478 NM_006893 NP_001188407 NP_008824 XM_005277509 XM_006711196 XM_011509257 XM_011509258 XM_017000530 XM_017000531 XM_017000532 XP_005277566 XP_006711259 XP_011507559 XP_011507560 XP_016856019 XP_016856020 XP_016856021 XR_001737023 XR_921751	17
chr1	206634502	206740169	105668	*	12	9130	21238.9	TRUE	chr1	206684905	206734281	49377	+	206685230	206732718	9261	9261	MAPKAPK2	NM_004759 NM_032960 NP_004750 NP_116584 XM_005273353 XM_017002810 XP_005273410 XP_016858299	9
chr1	206634502	206740169	105668	*	12	9130	21238.9	TRUE	chr1	206770764	206842981	72218	+	206836663	206842622	29949	29949	IL19	NM_001369605 NM_001393490 NM_001393491 NM_013371 NM_153758 NP_001356534 NP_001380419 NP_001380420 NP_037503 NP_715639 XM_011509450 XP_011507752	10
chr13	30607865	30674566	66702	*	8	6003	21150.9	TRUE	chr13	30617693	30660770	43078	+	30621141	30659356	10208	10208	USPL1	NM_001321532 NM_001321533 NM_001321534 NM_005800 NP_001308461 NP_001308462 NP_001308463 NP_005791 XM_006719751 XM_017020314 XM_017020315 XP_006719814 XP_016875803 XP_016875804	9
chr13	30607865	30674566	66702	*	8	6003	21150.9	TRUE	chr13	30456704	30617597	160894	-	30461357	30463680	3146	3146	HMGB1	NM_001313892 NM_001313893 NM_001363661 NM_001370339 NM_001370340 NM_001370341 NM_002128 NP_001300821 NP_001300822 NP_001350590 NP_001357268 NP_001357269 NP_001357270 NP_002119 XM_024449341 XP_024305109	6
chr13	30607865	30674566	66702	*	8	6003	21150.9	TRUE	chr13	30713478	30764426	50949	+	30713726	30764106	241	241	ALOX5AP	NM_001204406 NM_001629 NP_001191335 NP_001620 XM_017020522 XP_016876011	7
chr2	84864546	84947119	82574	*	13	9962	21117.8	TRUE	chr2	84905656	84906671	1016	+	84906018	84906423	9168	9168	TMSB10	NM_021103 NP_066926	3
chr2	84864546	84947119	82574	*	13	9962	21117.8	TRUE	chr2	84821650	84881975	60326	-	84821917	84881039	129293	129293	TRABD2A	NM_001080824 NM_001277053 NM_001307978 NP_001074293 NP_001263982 NP_001294907 XM_011532504 XP_011530806	12
chr2	84864546	84947119	82574	*	13	9962	21117.8	TRUE	chr2	84971093	85059472	88380	+	84971452	85053409	56888	56888	KCMF1	NM_020122 NP_064507 XM_006712052 XM_011532990 XM_017004511 XP_006712115 XP_011531292 XP_016860000	9
chr16	11768726	11810500	41775	*	5	5932	20999.8	TRUE	chr16	11750586	11797258	46673	-	11751317	11782354	29066	29066	ZC3H7A	NM_014153 NP_054872 XM_006720877 XM_011522463 XM_011522464 XM_017023174 XM_024450243 XP_006720940 XP_011520765 XP_011520766 XP_016878663 XP_024306011 XR_932825	27
chr16	11768726	11810500	41775	*	5	5932	20999.8	TRUE	chr16	11679083	11742857	63775	-	11679195	11742730	51061	51061	TXNDC11	NM_001303447 NM_001324022 NM_001324024 NM_001324025 NM_015914 NP_001290376 NP_001310951 NP_001310953 NP_001310954 NP_056998 NR_136671 NR_136672 NR_136673 NR_136674 XM_011522515 XM_011522516 XM_017023268 XP_011520817 XP_011520818 XP_016878757	15
chr14	75419262	75440947	21686	*	4	3988	20995.4	TRUE	chr14	75427716	75474111	46396	+	75432327	75469475	122953	122953	JDP2	NM_001135047 NM_001135048 NM_001135049 NM_130469 NP_001128519 NP_001128520 NP_001128521 NP_569736 XM_005267332 XM_017020971 XM_017020972 XM_017020973 XM_017020974 XM_017020975 XM_017020976 XP_005267389 XP_016876460 XP_016876461 XP_016876462 XP_016876463 XP_016876464 XP_016876465	8
chr5	138536452	138553915	17464	*	3	3687	20941.6	TRUE	chr5	138506095	138543236	37142	-	138508305	138542918	2107	2107	ETF1	NM_001256302 NM_001282185 NM_001291974 NM_001291975 NM_001364160 NM_004730 NP_001243231 NP_001269114 NP_001278903 NP_001278904 NP_001351089 NP_004721 NR_157090 XM_017009221 XP_016864710	12
chr1	40363729	40401383	37655	*	5	3513	20928.2	TRUE	chr1	40300489	40317813	17325	-	40301182	40317197	1298	1298	COL9A2	NM_001852 NP_001843 XM_006710365 XM_011540715 XM_011540716 XM_011540717 XM_017000332 XM_017000333 XP_006710428 XP_011539017 XP_011539018 XP_011539019 XP_016855821 XP_016855822	36
chr1	40363729	40401383	37655	*	5	3513	20928.2	TRUE	chr1	40450102	40463718	13617	+	40450962	40463589	65243	65243	ZFP69B	NM_001369565 NM_023070 NP_001356494 NP_075558 XM_005271136 XM_005271138 XM_005271139 XM_017002147 XP_005271193 XP_005271195 XP_005271196 XP_016857636	5
chr10	96229727	96300244	70518	*	11	7113	20928	TRUE	chr10	96304409	96338564	34156	+	96304498	96338224	1791	1791	DNTT	NM_001017520 NM_004088 NP_001017520 NP_004079	11
chr10	96229727	96300244	70518	*	11	7113	20928	TRUE	chr10	96189171	96271587	82417	-	96191973	96271398	29760	29760	BLNK	NM_001114094 NM_001258440 NM_001258441 NM_001258442 NM_013314 NP_001107566 NP_001245369 NP_001245370 NP_001245371 NP_037446 NR_047680 NR_047681 NR_047682 NR_047683	18
chr17	40312089	40341738	29650	*	6	4172	20861	TRUE	chr17	40309180	40357643	48464	+	40331219	40356226	5914	5914	RARA	NM_000964 NM_001024809 NM_001033603 NM_001145301 NM_001145302 NP_000955 NP_001019980 NP_001138773 NP_001138774 XM_005257552 XM_005257553 XM_005257554 XM_011525095 XM_011525096 XM_017024920 XP_005257609 XP_005257610 XP_005257611 XP_011523397 XP_011523398 XP_016880409	16
chr14	64493756	64505302	11547	*	3	3490	20833.6	TRUE	chr14	64503725	64533690	29966	+	64521505	64531897	22890	22890	ZBTB1	NM_001123329 NM_014950 NP_001116801 NP_055765 XM_005267410 XM_011536566 XM_011536568 XM_017021095 XP_005267467 XP_011534868 XP_011534870 XP_016876584	7
chr14	64493756	64505302	11547	*	3	3490	20833.6	TRUE	chr14	64535905	64546173	10269	+	64540850	64542769	3306	3306	HSPA2	NM_001387931 NM_021979 NP_001374860 NP_068814	2
chr14	64493756	64505302	11547	*	3	3490	20833.6	TRUE	chr14	64549920	64589381	39462	+	64549998	64589338	145376	145376	PPP1R36	NM_172365 NP_758953 XM_005267354 XM_005267355 XM_011536468 XM_024449485 XP_005267411 XP_005267412 XP_011534770 XP_024305253	14
chr14	64493756	64505302	11547	*	3	3490	20833.6	TRUE	chr14	64449106	64505213	56108	-	64449551	64490533	7597	7597	ZBTB25	NM_001304507 NM_001304508 NM_001354682 NM_001354683 NM_001354684 NM_001354685 NM_001354686 NM_001354687 NM_006977 NP_001291436 NP_001291437 NP_001341611 NP_001341612 NP_001341613 NP_001341614 NP_001341615 NP_001341616 NP_008908 XM_005268051 XM_006720250 XM_006720251 XM_006720252 XM_011537141 XM_011537146 XM_017021630 XM_017021631 XM_017021634 XM_017021636 XM_017021638 XP_005268108 XP_006720313 XP…	8
chr19	18152044	18205248	53205	*	6	7368	20802.8	TRUE	chr19	18173162	18178117	4956	+	18173842	18177911	10437	10437	IFI30	NM_006332 NP_006323	7
chr19	18152044	18205248	53205	*	6	7368	20802.8	TRUE	chr19	18153158	18178117	24960	+	18155880	18169294	5296	5296	PIK3R2	NM_005027 NP_005018 NR_073517 NR_162071	23
chr19	18152044	18205248	53205	*	6	7368	20802.8	TRUE	chr19	18196784	18204042	7259	-	18197470	18202740	5864	5864	RAB3A	NM_002866 NP_002857	5
chr19	18152044	18205248	53205	*	6	7368	20802.8	TRUE	chr19	18193218	18196948	3731	+	18193282	18196055	84769	84769	MPV17L2	NM_032683 NP_116072	4
chr17	4365127	4413361	48235	*	8	6558	20784	TRUE	chr17	4269259	4366675	97417	-	4282835	4366316	7326	7326	UBE2G1	NM_003342 NM_182682 NP_003333	9
chr17	4365127	4413361	48235	*	8	6558	20784	TRUE	chr17	4433940	4488208	54269	+	4433968	4487894	201305	201305	SPNS3	NM_001320449 NM_182538 NP_001307378 NP_872344 XM_011523723 XM_011523724 XM_011523725 XM_011523726 XM_011523728 XM_017024345 XP_011522025 XP_011522026 XP_011522027 XP_011522028 XP_011522030 XP_016879834 XR_934008	13
chr14	105473746	105491716	17971	*	4	3767	20712.2	TRUE	chr14	105472962	105480162	7201	+	105473248	105479653	1397	1397	CRIP2	NM_001270837 NM_001270841 NM_001312 NP_001257766 NP_001257770 NP_001303 NR_073081 NR_073082 NR_073083 NR_073084 NR_073085 XM_024449480 XM_024449481 XP_024305248 XP_024305249 XR_002957531	8
chr14	105473746	105491716	17971	*	4	3767	20712.2	TRUE	chr14	105486317	105491659	5343	+	105487260	105488511	1396	1396	CRIP1	NM_001311 NP_001302	5
chr14	105473746	105491716	17971	*	4	3767	20712.2	TRUE	chr14	105487199	105499575	12377	+	105487260	105498946	283643	283643	TEDC1	NM_001134875 NM_001134876 NM_001134877 NM_001198983 NM_001367178 NM_173608 NP_001128347 NP_001128348 NP_001128349 NP_001185912 NP_001354107	13
chr14	105473746	105491716	17971	*	4	3767	20712.2	TRUE	chr14	105526583	105530202	3620	+	105528835	105529794	80757	80757	TMEM121	NM_001331238 NM_025268 NP_001318167 NP_079544 XM_006720261 XP_006720324	4
chr17	28698102	28729076	30975	*	7	7207	20680.3	TRUE	chr17	28648346	28662189	13844	-	28648989	28661876	6388	6388	SDF2	NM_006923 NP_008854 NR_045585 XM_011525106 XP_011523408	7
chr17	28698102	28729076	30975	*	7	7207	20680.3	TRUE	chr17	28719985	28724359	4375	+	28720006	28723881	6147	6147	RPL23A	NM_000984 NP_000975	7
chr17	28698102	28729076	30975	*	7	7207	20680.3	TRUE	chr17	28725897	28743455	17559	+	28728814	28741987	284086	284086	NEK8	NM_178170 NP_835464	14
chr17	28698102	28729076	30975	*	7	7207	20680.3	TRUE	chr17	28744011	28750956	6946	+	28744113	28749968	9618	9618	TRAF4	NM_004295 NM_145751 NP_004286 XM_011525504 XM_011525505 XM_011525506 XM_011525507 XM_011525508 XP_011523806 XP_011523807 XP_011523808 XP_011523809 XP_011523810	7
chr17	28698102	28729076	30975	*	7	7207	20680.3	TRUE	chr17	28703197	28711888	8692	-	28703558	28711660	147011	147011	PROCA1	NM_001304949 NM_001304951 NM_001304952 NM_001304953 NM_001304954 NM_001366301 NM_001366302 NM_001366303 NM_152465 NP_001291878 NP_001291880 NP_001291881 NP_001291882 NP_001291883 NP_001353230 NP_001353231 NP_001353232 NP_689678 XM_006721723 XM_011524398 XM_011524399 XM_011524401 XP_006721786 XP_011522700 XP_011522701 XP_011522703	7
chr17	28698102	28729076	30975	*	7	7207	20680.3	TRUE	chr17	28714281	28718429	4149	-	28714572	28718267	83871	83871	RAB34	NM_001142624 NM_001142625 NM_001144942 NM_001144943 NM_001256276 NM_001256277 NM_001256278 NM_001256281 NM_031934 NP_001136096 NP_001136097 NP_001138414 NP_001138415 NP_001243205 NP_001243206 NP_001243207 NP_001243210 NP_114140 XM_024450968 XM_024450969 XM_024450970 XM_024450971 XM_024450972 XM_024450973 XM_024450975 XM_024450976 XM_024450977 XM_024450978 XM_024450979 XM_024450980 XM_024450981 XM…	6
chr17	28698102	28729076	30975	*	7	7207	20680.3	TRUE	chr17	28724348	28727935	3588	-	28724510	28726808	116238	116238	TLCD1	NM_001160407 NM_138463 NP_001153879 NP_612472 XM_006721671 XM_011524278 XP_006721734 XP_011522580	6
chr5	177291035	177312840	21806	*	5	4661	20660.2	TRUE	chr5	177303799	177306949	3151	+	177303986	177306614	27166	27166	PRELID1	NM_001271828 NM_013237 NP_001258757 NP_037369	5
chr5	177291035	177312840	21806	*	5	4661	20660.2	TRUE	chr5	177301198	177311870	10673	-	177301743	177303288	53917	53917	RAB24	NM_001031677 NM_130781 NP_001026847 NP_570137 NR_109789 NR_109790	8
chr5	177291035	177312840	21806	*	5	4661	20660.2	TRUE	chr5	177305500	177312757	7258	-	177307119	177311830	83463	83463	MXD3	NM_001142935 NM_001394986 NM_001394987 NM_031300 NP_001136407 NP_001381915 NP_001381916 NP_112590	4
chr5	177291035	177312840	21806	*	5	4661	20660.2	TRUE	chr5	177357924	177372596	14673	+	177358025	177372075	10636	10636	RGS14	NM_001366617 NM_001366618 NM_006480 NP_001353546 NP_001353547 NP_006471 XM_024454328 XP_024310096	13
chr19	40403575	40444860	41286	*	7	5428	20654.9	TRUE	chr19	40379271	40390181	10911	-	40379587	40389902	147746	147746	HIPK4	NM_144685 NP_653286 XM_006723036 XP_006723099	4
chr19	40403575	40444860	41286	*	7	5428	20654.9	TRUE	chr19	40440844	40444335	3492	-	40441490	40442080	29946	29946	SERTAD3	NM_013368 NM_203344 NP_037500 NP_976219 XM_005258832 XM_006723179 XP_005258889 XP_006723242	4
chr19	40403575	40444860	41286	*	7	5428	20654.9	TRUE	chr19	40421589	40425992	4404	-	40422836	40423546	29950	29950	SERTAD1	NM_013376 NP_037508	2
chr19	40403575	40444860	41286	*	7	5428	20654.9	TRUE	chr19	40393766	40414793	21028	-	40393966	40414742	57716	57716	PRX	NM_020956 NM_181882 NP_066007 NP_870998 XM_011527171 XM_017027046 XM_017027047 XP_011525473 XP_016882535 XP_016882536	14
chr19	40403575	40444860	41286	*	7	5428	20654.9	TRUE	chr19	40466241	40576464	110224	+	40472622	40575569	57731	57731	SPTBN4	NM_020971 NM_025213 NP_066022 NP_079489 XM_011527173 XM_017027049 XM_017027050 XM_017027051 XM_017027052 XP_011525475 XP_016882538 XP_016882539 XP_016882540 XP_016882541	40
chr5	134874038	134905794	31757	*	6	5325	20622.3	TRUE	chr5	134874371	134901635	27265	+	134874428	134899685	79770	79770	TXNDC15	NM_001350735 NM_024715 NP_001337664 NP_078991	8
chr5	134874038	134905794	31757	*	6	5325	20622.3	TRUE	chr5	134905120	134969660	64541	+	134905140	134960681	84105	84105	PCBD2	NM_032151 NP_115527	6
chr5	134874038	134905794	31757	*	6	5325	20622.3	TRUE	chr5	134905173	135011696	106524	+	134905173	135011623	347732	347732	CATSPER3	NM_178019 NP_821138	14
chr12	121758419	121820183	61765	*	6	4703	20615	TRUE	chr12	121804009	121832656	28648	+	121804738	121830239	23067	23067	SETD1B	NM_001353345 NM_015048 NP_001340274 XM_006719296 XM_024448898 XP_006719359 XP_024304666	17
chr12	121758419	121820183	61765	*	6	4703	20615	TRUE	chr12	121777754	121800677	22924	-	121779498	121793633	54509	54509	RHOF	NM_019034 NP_061907	6
chr12	121758419	121820183	61765	*	6	4703	20615	TRUE	chr12	121780952	121803906	22955	-	121780952	121781118	338799	338799	LINC01089	NM_178538 NR_002809 NR_152735 NR_152736 NR_152737 NR_152738 NR_152739 NR_152740	10
chr3	169945533	169978943	33411	*	5	5327	20590.6	TRUE	chr3	169966635	169998373	31739	+	169966823	169993063	7095	7095	SEC62	NM_003262 NP_003253 XM_011513114 XP_011511416	11
chr1	156725750	156768623	42874	*	8	6265	20590	TRUE	chr1	156668763	156677407	8645	-	156669322	156677264	10763	10763	NES	NM_006617 NM_024609 NP_006608	4
chr1	156725750	156768623	42874	*	8	6265	20590	TRUE	chr1	156728442	156736960	8519	+	156729105	156736753	51093	51093	METTL25B	NM_001142560 NM_015997 NP_001136032 NP_057081 XM_005245234 XM_005245235 XM_005245236 XM_005245237 XM_011509600 XM_017001404 XM_017001405 XM_017001406 XM_024447421 XP_005245291 XP_005245292 XP_005245293 XP_005245294 XP_011507902 XP_016856893 XP_016856894 XP_016856895 XP_024303189 XR_426777 XR_426778	8
chr1	156725750	156768623	42874	*	8	6265	20590	TRUE	chr1	156750610	156800815	50206	+	156767772	156800460	5546	5546	PRCC	NM_005973 NM_199416 NP_005964	9
chr1	156725750	156768623	42874	*	8	6265	20590	TRUE	chr1	156699606	156705816	6211	-	156700026	156705446	1382	1382	CRABP2	NM_001199723 NM_001878 NP_001186652 NP_001869	5
chr1	156725750	156768623	42874	*	8	6265	20590	TRUE	chr1	156721891	156728766	6876	-	156723349	156727652	81875	81875	ISG20L2	NM_001303095 NM_001370150 NM_001370151 NM_001370152 NM_030980 NP_001290024 NP_001357079 NP_001357080 NP_001357081 XM_005245518 XP_005245575	4
chr1	156725750	156768623	42874	*	8	6265	20590	TRUE	chr1	156737303	156741590	4288	-	156737398	156738704	79590	79590	MRPL24	NM_024540 NM_145729 NP_078816 NP_663781 XM_011509981 XM_011509982 XP_011508283 XP_011508284	8
chr1	156725750	156768623	42874	*	8	6265	20590	TRUE	chr1	156742109	156766925	24817	-	156743449	156752363	3068	3068	HDGF	NM_001126050 NM_001126051 NM_001319186 NM_001319187 NM_001319188 NM_004494 NP_001119522 NP_001119523 NP_001306115 NP_001306116 NP_001306117 NP_004485 NR_135008 XM_011509453 XM_011509454 XM_011509455 XP_011507755 XP_011507756 XP_011507757 XR_001737133	10
chr1	156725750	156768623	42874	*	8	6265	20590	TRUE	chr1	156815640	156881850	66211	+	156842144	156881642	4914	4914	NTRK1	NM_001007792 NM_001012331 NM_002529 NP_001007793 NP_001012331 NP_002520	21
chr3	136182296	136197450	15155	*	3	3313	20482.5	TRUE	chr3	136148917	136197241	48325	-	136151147	136195113	55167	55167	MSL2	NM_001145417 NM_018133 NP_001138889 NP_060603 XM_005247571 XM_006713684 XM_011512949 XP_005247628 XP_006713747 XP_011511251	5
chr1	150609197	150630385	21189	*	4	3488	20395.3	TRUE	chr1	150563102	150579738	16637	-	150577364	150579530	4170	4170	MCL1	NM_001197320 NM_021960 NM_182763 NP_001184249 NP_068779 NP_877495	2
chr1	150609197	150630385	21189	*	4	3488	20395.3	TRUE	chr1	150600851	150629612	28762	-	150601114	150629470	2029	2029	ENSA	NM_004436 NM_207042 NM_207043 NM_207044 NM_207045 NM_207046 NM_207047 NM_207168 NP_004427 NP_996925 NP_996926 NP_996927 NP_996928 NP_996929 NP_996930 NP_997051	7
chr17	74736576	74792026	55451	*	10	6017	20333.2	TRUE	chr17	74748628	74769353	20726	+	74748847	74768656	9368	9368	SLC9A3R1	NM_004252 NP_004243 XR_002958087	6
chr17	74736576	74792026	55451	*	10	6017	20333.2	TRUE	chr17	74694311	74712978	18668	-	74695096	74712866	146722	146722	CD300LF	NM_001289082 NM_001289083 NM_001289084 NM_001289085 NM_001289086 NM_001289087 NM_139018 NP_001276011 NP_001276012 NP_001276013 NP_001276014 NP_001276015 NP_001276016 NP_620587 NR_110298 XM_017024212 XM_017024213 XM_017024214 XM_017024215 XM_017024216 XM_017024217 XP_016879701 XP_016879702 XP_016879703 XP_016879704 XP_016879705 XP_016879706	9
chr17	74736576	74792026	55451	*	10	6017	20333.2	TRUE	chr17	74776499	74839753	63255	+	74777331	74839101	54868	54868	TMEM104	NM_001321264 NM_017728 NP_001308193 NP_060198 XM_006721963 XM_017024797 XM_017024798 XM_017024799 XP_006722026 XP_016880286 XP_016880287 XP_016880288	11
chr17	74736576	74792026	55451	*	10	6017	20333.2	TRUE	chr17	74770529	74776367	5839	-	74771724	74775713	26151	26151	NAT9	NM_001305077 NM_001305078 NM_001305079 NM_001305080 NM_001305081 NM_001305082 NM_001305083 NM_001305084 NM_001305085 NM_001305086 NM_001305087 NM_001305088 NM_015654 NP_001292006 NP_001292007 NP_001292008 NP_001292009 NP_001292010 NP_001292011 NP_001292012 NP_001292013 NP_001292014 NP_001292015 NP_001292016 NP_001292017 NP_056469 NR_130953 NR_130954 XM_005257212 XM_006721813 XM_011524607 XM_01702…	6
chr10	102642026	102661734	19709	*	4	4032	20285.4	TRUE	chr10	102644479	102658318	13840	+	102644618	102658062	81603	81603	TRIM8	NM_001345950 NM_030912 NP_001332879 NP_112174 NR_144321	7
chr3	195520761	195550766	30006	*	5	4517	20233.6	TRUE	chr3	195514428	195543386	28959	-	195516896	195543025	5504	5504	PPP1R2	NM_001291504 NM_001291505 NM_001316325 NM_006241 NP_001278433 NP_001278434 NP_001303254 NP_006232 NR_133014 XM_006713682 XP_006713745	7
chr12	71685820	71694704	8885	*	4	2660	20222.6	TRUE	chr12	71609599	71667725	58127	-	71610428	71663610	196441	196441	ZFC3H1	NM_144982 NP_659419	34
chr11	62831349	62842593	11245	*	2	4832	20210	TRUE	chr11	62771629	62792006	20378	-	62772106	62791994	79064	79064	TMEM223	NM_001080501 NM_024084 NP_001073970	5
chr11	62831349	62842593	11245	*	2	4832	20210	TRUE	chr11	62792123	62806302	14180	-	62792476	62805356	10482	10482	NXF1	NM_001081491 NM_006362 NP_001074960 NP_006353 XR_001747724	21
chr11	62831349	62842593	11245	*	2	4832	20210	TRUE	chr11	62856004	62888880	32877	+	62856270	62888693	6520	6520	SLC3A2	NM_001012661 NM_001012662 NM_001012663 NM_001012664 NM_001013251 NM_002394 NP_001012680 NP_001012682 NP_001013269 NP_002385 NR_037193	13
chr11	62831349	62842593	11245	*	2	4832	20210	TRUE	chr11	62806860	62832051	25192	-	62807469	62831243	6811	6811	STX5	NM_001244666 NM_001330294 NM_003164 NP_001231595 NP_001317223 NP_003155 XM_011545224 XP_011543526	10
chr11	62831349	62842593	11245	*	2	4832	20210	TRUE	chr11	62832319	62832803	485	-	62832376	62832750	111216277	111216277	TEX54	NM_001395459 NP_001382388	1
chr11	62831349	62842593	11245	*	2	4832	20210	TRUE	chr11	62832911	62841809	8899	-	62832952	62839570	54663	54663	WDR74	NM_001307977 NM_001369447 NM_001369448 NM_001369449 NM_001369450 NM_001369451 NM_001369453 NM_018093 NP_001294906 NP_001356376 NP_001356377 NP_001356378 NP_001356379 NP_001356380 NP_001356382 NP_060563 NR_161381	9
chr9	136881825	136917435	35611	*	7	4887	20130.3	TRUE	chr9	136881912	136926607	44696	+	136898741	136925901	7186	7186	TRAF2	NM_021138 NP_066961 XM_011518974 XM_011518976 XM_011518977 XP_011517276 XP_011517278 XP_011517279	19
chr9	136881825	136917435	35611	*	7	4887	20130.3	TRUE	chr9	136862119	136866308	4190	-	136862284	136866258	8721	8721	EDF1	NM_001281297 NM_001281298 NM_001281299 NM_003792 NM_153200 NP_001268226 NP_001268227 NP_001268228 NP_003783 NP_694880	4
chr9	136881825	136917435	35611	*	7	4887	20130.3	TRUE	chr9	136945185	136946975	1791	+	136945321	136946781	733	733	C8G	NM_000606 NP_000597 XR_245338	7
chr9	136881825	136917435	35611	*	7	4887	20130.3	TRUE	chr9	136949551	136955497	5947	+	136952328	136955399	286256	286256	LCN12	NM_178536 NP_848631 XM_006717065 XM_011518560 XM_011518561 XM_011518562 XM_017014631 XM_017014632 XP_006717128 XP_011516862 XP_011516863 XP_011516864 XP_016870120 XP_016870121 XR_001746278 XR_001746279 XR_001746280	5
chr9	33125871	33159991	34121	*	5	3793	20089.2	TRUE	chr9	33041765	33076674	34910	-	33047293	33076608	55234	55234	SMU1	NM_018225 NP_060695 XM_005251503 XP_005251560	12
chr3	152183462	152205596	22135	*	7	4111	20064.5	TRUE	chr3	152243828	152465780	221953	+	152300194	152459327	4154	4154	MBNL1	NM_001314057 NM_001363870 NM_001376818 NM_001376819 NM_001376820 NM_001376821 NM_001376822 NM_001376823 NM_001376824 NM_001376825 NM_001376826 NM_001376827 NM_001376828 NM_001376829 NM_001376830 NM_001376831 NM_001376832 NM_001376833 NM_001376834 NM_001376835 NM_001376836 NM_001376837 NM_001376838 NM_001376839 NM_001376840 NM_001376841 NM_001376842 NM_001376843 NM_001376844 NM_001376845 NM_001376…	19
chr19	18502926	18522569	19644	*	4	3187	20061.4	TRUE	chr19	18571730	18577550	5821	+	18573301	18575229	7311	7311	UBA52	NM_001033930 NM_001321017 NM_001321018 NM_001321019 NM_001321020 NM_001321021 NM_001321022 NM_003333 NP_001029102 NP_001307946 NP_001307947 NP_001307948 NP_001307949 NP_001307950 NP_001307951 NP_003324 XM_005260052 XM_005260053 XM_005260054 XM_006722871 XM_017027198 XP_005260109 XP_005260110 XP_005260111 XP_006722934 XP_016882687	4
chr19	18502926	18522569	19644	*	4	3187	20061.4	TRUE	chr19	18557762	18569387	11626	+	18562057	18568631	79036	79036	KXD1	NM_001171948 NM_001171949 NM_024069 NP_001165419 NP_001165420 NP_076974 XM_005260073 XM_006722883 XM_011528272 XM_011528273 XM_017027281 XM_017027282 XP_005260130 XP_006722946 XP_011526574 XP_011526575 XP_016882770 XP_016882771	9
chr19	18502926	18522569	19644	*	4	3187	20061.4	TRUE	chr19	18442663	18522116	79454	-	18444752	18522055	8178	8178	ELL	NM_006532 NP_006523 XM_011528330 XM_017027335 XM_017027336 XM_017027337 XP_011526632 XP_016882824 XP_016882825 XP_016882826 XR_001753769 XR_936207	14
chr15	67520437	67543497	23061	*	5	4451	19981.5	TRUE	chr15	67521131	67530146	9016	+	67521249	67526545	145853	145853	C15orf61	NM_001143936 NP_001137408	3
chr15	67520437	67543497	23061	*	5	4451	19981.5	TRUE	chr15	67542703	67807117	264415	+	67543336	67806750	5607	5607	MAP2K5	NM_001206804 NM_002757 NM_145160 NM_145161 NM_145162 NP_001193733 NP_002748 NP_660143 XM_011521787 XM_011521788 XM_017022414 XM_024449988 XP_011520089 XP_011520090 XP_016877903 XP_024305756 XR_001751355	31
chr17	75822289	75878948	56660	*	7	7880	19908.1	TRUE	chr17	75776434	75785486	9053	-	75778591	75779174	3021	3021	H3-3B	NM_005324 NP_005315	4
chr17	75822289	75878948	56660	*	7	7880	19908.1	TRUE	chr17	75827225	75844552	17328	-	75827470	75844337	201294	201294	UNC13D	NM_199242 NP_954712	30
chr17	75822289	75878948	56660	*	7	7880	19908.1	TRUE	chr17	75845699	75856507	10809	-	75845896	75855297	23558	23558	WBP2	NM_001330499 NM_001348170 NM_012478 NP_001317428 NP_001335099 NP_036610	8
chr17	75822289	75878948	56660	*	7	7880	19908.1	TRUE	chr17	75874164	75878581	4418	-	75874483	75878548	91107	91107	TRIM47	NM_033452 NP_258411 XM_005257787 XM_005257788 XP_005257844 XP_005257845	5
chr5	134632166	134649636	17471	*	3	4053	19907.1	TRUE	chr5	134648785	134727909	79125	+	134649077	134725094	10802	10802	SEC24A	NM_001252231 NM_021982 NP_001239160 NP_068817 XM_006714523 XM_017008961 XM_017008962 XM_017008963 XP_006714586 XP_016864450 XP_016864451 XP_016864452 XR_948228	24
chr5	134632166	134649636	17471	*	3	4053	19907.1	TRUE	chr5	134601149	134649271	48123	-	134606950	134624019	51128	51128	SAR1B	NM_001033503 NM_016103 NP_001028675 NP_057187	12
chr2	218246567	218301747	55181	*	7	4131	19900.4	TRUE	chr2	218259496	218263861	4366	+	218262725	218263717	151306	151306	GPBAR1	NM_001077191 NM_001077194 NM_001321950 NM_170699 NP_001070659 NP_001070662 NP_001308879 NP_733800 XM_011510743 XM_017003467 XM_017003468 XM_017003469 XP_011509045 XP_016858956 XP_016858957 XP_016858958	3
chr2	218246567	218301747	55181	*	7	4131	19900.4	TRUE	chr2	218269651	218346793	77143	+	218270536	218344981	25953	25953	PNKD	NM_001077399 NM_015488 NM_022572 NP_001070867 NP_056303 NP_072094 XM_017003771 XM_017003772 XP_016859260 XP_016859261	11
chr2	218246567	218301747	55181	*	7	4131	19900.4	TRUE	chr2	218264129	218270178	6050	-	218264533	218270086	14	14	AAMP	NM_001087 NM_001302545 NP_001078 NP_001289474 XM_024452712 XP_024308480	7
chr2	218246567	218301747	55181	*	7	4131	19900.4	TRUE	chr2	218274197	218292586	18390	-	218275475	218282141	64114	64114	TMBIM1	NM_001321427 NM_001321428 NM_001321429 NM_001321430 NM_001321432 NM_001321433 NM_001321435 NM_001321436 NM_001321438 NM_022152 NP_001308356 NP_001308357 NP_001308358 NP_001308359 NP_001308361 NP_001308362 NP_001308364 NP_001308365 NP_001308367 NP_071435 NR_135643 XM_011511627 XP_011509929	17
chr1	234599591	234611542	11952	*	4	3456	19887.7	TRUE	chr1	234604269	234610178	5910	-	234607137	234609494	359948	359948	IRF2BP2	NM_001077397 NM_182972 NP_001070865 NP_892017	3
chr22	38934925	39027497	92573	*	9	7108	19866.1	TRUE	chr22	38952751	38992778	40028	+	38957692	38992445	200315	200315	APOBEC3A	NM_001270406 NM_145699 NP_001257335 NP_663745	7
chr22	38934925	39027497	92573	*	9	7108	19866.1	TRUE	chr22	38982347	38992804	10458	+	38982454	38992488	9582	9582	APOBEC3B	NM_001270411 NM_004900 NP_001257340 NP_004891	7
chr22	38934925	39027497	92573	*	9	7108	19866.1	TRUE	chr22	39014257	39020352	6096	+	39014363	39018387	27350	27350	APOBEC3C	NM_014508 NP_055323	4
chr22	38934925	39027497	92573	*	9	7108	19866.1	TRUE	chr22	39014363	39033277	18915	+	39014363	39032316	140564	140564	APOBEC3D	NM_001363781 NM_152426 NP_001350710 NP_689639 XM_017028596 XP_016884085 XR_001755169 XR_001755170	8
chr22	38934925	39027497	92573	*	9	7108	19866.1	TRUE	chr22	39040604	39055972	15369	+	39040961	39052695	200316	200316	APOBEC3F	NM_001006666 NM_145298 NP_001006667 NP_660341 XM_017028642 XM_017028643 XM_024452178 XM_024452179 XP_016884131 XP_016884132 XP_024307946 XP_024307947 XR_002958675	8
chr22	38934925	39027497	92573	*	9	7108	19866.1	TRUE	chr22	39077067	39087743	10677	+	39077362	39087421	60489	60489	APOBEC3G	NM_001349436 NM_001349437 NM_001349438 NM_021822 NP_001336365 NP_001336366 NP_001336367 NP_068594 NR_146179 XM_017028903 XM_017028904 XP_016884392 XP_016884393	8
chr14	21070381	21107360	36980	*	6	4797	19787.5	TRUE	chr14	21070273	21090248	19976	+	21070397	21088871	55701	55701	ARHGEF40	NM_001278529 NM_001278530 NM_018071 NP_001265458 NP_001265459 NP_060541 XM_005267844 XM_011536937 XM_011536938 XM_017021434 XM_017021435 XM_017021436 XM_017021437 XP_005267901 XP_011535239 XP_011535240 XP_016876923 XP_016876924 XP_016876925 XP_016876926	20
chr14	21070381	21107360	36980	*	6	4797	19787.5	TRUE	chr14	21032818	21034807	1990	-	21033818	21034288	440163	440163	RNASE13	NM_001012264 NP_001012264	2
chr14	21070381	21107360	36980	*	6	4797	19787.5	TRUE	chr14	21098811	21103724	4914	+	21101344	21103258	643382	643382	TMEM253	NM_001146683 NM_001395464 NM_001395465 NM_001395466 NM_001395467 NP_001140155 NP_001382393 NP_001382394 NP_001382395 NP_001382396 NR_172562 XM_011537078 XM_011537079 XM_011537081 XM_011537083 XM_011537084 XM_011537085 XP_011535380 XP_011535381 XP_011535383 XP_011535385 XP_011535386 XP_011535387	7
chr14	21070381	21107360	36980	*	6	4797	19787.5	TRUE	chr14	21016763	21070872	54110	-	21016879	21070851	57447	57447	NDRG2	NM_001282211 NM_001282212 NM_001282213 NM_001282214 NM_001282215 NM_001282216 NM_001320329 NM_001354558 NM_001354559 NM_001354560 NM_001354561 NM_001354562 NM_001354564 NM_001354565 NM_001354566 NM_001354567 NM_001354568 NM_001354569 NM_001354570 NM_016250 NM_201535 NM_201536 NM_201537 NM_201538 NM_201539 NM_201540 NM_201541 NP_001269140 NP_001269141 NP_001269142 NP_001269143 NP_001269144 NP_0012…	16
chr14	21070381	21107360	36980	*	6	4797	19787.5	TRUE	chr14	21090077	21104722	14646	-	21090536	21098851	51222	51222	ZNF219	NM_001101672 NM_001102454 NM_016423 NP_001095142 NP_001095924 NP_057507 XM_005267739 XM_011536825 XM_017021354 XM_024449623 XM_024449624 XM_024449625 XP_005267796 XP_011535127 XP_016876843 XP_024305391 XP_024305392 XP_024305393	9
chr7	81769081	81813198	44118	*	9	6444	19778.4	TRUE	chr7	81699010	81770438	71429	-	81702581	81769971	3082	3082	HGF	NM_000601 NM_001010931 NM_001010932 NM_001010933 NM_001010934 NP_000592 NP_001010931 NP_001010932 NP_001010933 NP_001010934 XM_006715956 XM_011516115 XM_017012097 XM_017012098 XP_006716019 XP_011514417 XP_016867586 XP_016867587	20
chr10	22296903	22357259	60357	*	6	3990	19736.1	TRUE	chr10	22316386	22326521	10136	+	22316417	22320062	23412	23412	COMMD3	NM_012071 NP_036203	5
chr10	22296903	22357259	60357	*	6	3990	19736.1	TRUE	chr10	22316388	22329542	13155	+	22316418	22329542	100532731	100532731	COMMD3-BMI1	NM_001204062 NP_001190991	15
chr10	22296903	22357259	60357	*	6	3990	19736.1	TRUE	chr10	22321099	22331484	10386	+	22326450	22329542	648	648	BMI1	NM_005180 NP_005171	8
chr10	22296903	22357259	60357	*	6	3990	19736.1	TRUE	chr10	22345445	22417610	72166	+	22345612	22416688	9576	9576	SPAG6	NM_001253854 NM_001253855 NM_012443 NM_172242 NP_001240783 NP_001240784 NP_036575 NP_758442 XM_005252645 XM_005252646 XP_005252702 XP_005252703	12
chr14	52694825	52748300	53476	*	9	6660	19726.9	TRUE	chr14	52707178	52728590	21413	+	52707178	52727617	5706	5706	PSMC6	NM_001366414 NM_002806 NP_001353343 NP_002797 NR_158967 XR_943495	12
chr14	52694825	52748300	53476	*	9	6660	19726.9	TRUE	chr14	52730166	52774989	44824	+	52730475	52771106	6815	6815	STYX	NM_001130701 NM_145251 NP_001124173 NP_660294 XM_011537108 XM_011537109 XP_011535410 XP_011535411 XR_001750530	11
chr14	52694825	52748300	53476	*	9	6660	19726.9	TRUE	chr14	52639915	52695900	55986	-	52643570	52695481	30001	30001	ERO1A	NM_001382464 NM_001382465 NM_001382466 NM_001382467 NM_001382468 NM_001382469 NM_001382470 NM_001382471 NM_001382472 NM_001382473 NM_001382474 NM_001382475 NM_001382476 NM_014584 NP_001369393 NP_001369394 NP_001369395 NP_001369396 NP_001369397 NP_001369398 NP_001369399 NP_001369400 NP_001369401 NP_001369402 NP_001369403 NP_001369404 NP_001369405 NP_055399 XM_024449554 XP_024305322	15
chr11	57657139	57680778	23640	*	3	3453	19712.6	TRUE	chr11	57667747	57701182	33436	+	57673091	57700031	25921	25921	ZDHHC5	NM_015457 NP_056272 XM_011544899 XM_011544900 XM_011544901 XM_017017498 XP_011543201 XP_011543202 XP_011543203 XP_016872987 XR_001747825	14
chr11	57657139	57680778	23640	*	3	3453	19712.6	TRUE	chr11	57645087	57649944	4858	-	57645981	57647200	219539	219539	YPEL4	NM_001363487 NM_145008 NP_001350416 NP_659445	3
chr11	57657139	57680778	23640	*	3	3453	19712.6	TRUE	chr11	57712582	57818431	105850	+	57712619	57816308	100528016	100528016	TMX2-CTNND1	NR_037646	27
chr11	57657139	57680778	23640	*	3	3453	19712.6	TRUE	chr11	57712593	57740973	28381	+	57712619	57740245	51075	51075	TMX2	NM_001144012 NM_001347890 NM_001347891 NM_001347892 NM_001347893 NM_001347894 NM_001347895 NM_001347896 NM_001347898 NM_015959 NP_001137484 NP_001334819 NP_001334820 NP_001334821 NP_001334822 NP_001334823 NP_001334824 NP_001334825 NP_001334827 NP_057043 NR_037645 NR_144933 NR_144934 NR_144935	6
chr20	23336467	23363685	27219	*	4	5144	19666	TRUE	chr20	23350791	23354771	3981	+	23354042	23354464	29107	29107	NXT1	NM_013248 NP_037380	2
chr20	23336467	23363685	27219	*	4	5144	19666	TRUE	chr20	23362182	23373062	10881	+	23364384	23370441	64412	64412	GZF1	NM_001317012 NM_001317019 NM_022482 NP_001303941 NP_001303948 NP_071927 XM_005260800 XM_005260802 XM_011529321 XM_011529322 XM_017028017 XM_017028018 XM_017028019 XM_024451968 XM_024451969 XP_005260857 XP_005260859 XP_011527623 XP_011527624 XP_016883506 XP_016883507 XP_016883508 XP_024307736 XP_024307737 XR_001754375 XR_001754376	8
chr20	35574801	35619707	44907	*	5	4650	19662.9	TRUE	chr20	35520852	35529652	8801	-	35528258	35529373	140873	140873	C20orf173	NM_001145350 NM_080828 NP_001138822 NR_026933 XM_006723710 XM_011528577 XM_024451835 XP_006723773 XP_011526879 XP_024307603 XR_001754182 XR_936504	11
chr20	35574801	35619707	44907	*	5	4650	19662.9	TRUE	chr20	35615829	35621094	5266	+	35616004	35621022	6676	6676	SPAG4	NM_001317931 NM_003116 NP_001304860 NP_003107 XM_005260520 XM_011529009 XP_005260577 XP_011527311	10
chr1	26820860	26840139	19280	*	5	3466	19535.4	TRUE	chr1	26826688	26857604	30917	+	26826805	26856226	84243	84243	ZDHHC18	NM_032283 NP_115659	9
chr1	26820860	26840139	19280	*	5	3466	19535.4	TRUE	chr1	26863149	26864456	1308	+	26863213	26863959	2810	2810	SFN	NM_006142 NP_006133	1
chr5	172764966	172778234	13269	*	3	3797	19522.5	TRUE	chr5	172768096	172771195	3100	-	172768762	172770952	1843	1843	DUSP1	NM_004417 NP_004408	4
chr15	44287841	44325743	37903	*	5	4588	19508.2	TRUE	chr15	44288719	44415758	127040	+	44289030	44413406	113201	113201	GOLM2	NM_138423 NM_177974 NP_612432 NP_816929 NR_157849	15
chr5	181206888	181246386	39499	*	7	6759	19500.2	TRUE	chr5	181222499	181235808	13310	+	181224000	181235379	90933	90933	TRIM41	NM_033549 NM_201627 NP_291027 NP_963921 NR_045218 XM_006714929 XM_006714930 XM_006714931 XM_006714932 XP_006714992 XP_006714993 XP_006714994 XP_006714995 XR_941119	2
chr5	181206888	181246386	39499	*	7	6759	19500.2	TRUE	chr5	181193924	181217864	23941	-	181195166	181205110	81786	81786	TRIM7	NM_033342 NM_203293 NM_203294 NM_203295 NM_203296 NM_203297 NP_203128 NP_976038 NP_976039 NP_976040 NP_976041 NP_976042 XM_017009903 XM_017009904 XM_024446224 XP_016865392 XP_016865393 XP_024301992	9
chr5	181206888	181246386	39499	*	7	6759	19500.2	TRUE	chr5	181236897	181248096	11200	-	181236977	181247376	10399	10399	RACK1	NM_006098 NP_006089	9
chr2	231662058	231687803	25746	*	5	5496	19447.8	TRUE	chr2	231706895	231713551	6657	+	231707766	231712851	5757	5757	PTMA	NM_001099285 NM_002823 NP_001092755 NP_002814	8
chr3	120094058	120103717	9660	*	2	3053	19430	TRUE	chr3	119821321	120094447	273127	-	119826625	120093434	2932	2932	GSK3B	NM_001146156 NM_001354596 NM_002093 NP_001139628 NP_001341525 NP_002084 XM_006713610 XP_006713673 XR_002959518	42
chr12	56628779	56646476	17698	*	5	4825	19378.2	TRUE	chr12	56595596	56636816	41221	-	56598618	56636185	11176	11176	BAZ2A	NM_001300905 NM_001351156 NM_013449 NP_001287834 NP_001338085 NP_038477 XM_011537801 XM_011537803 XM_011537804 XM_011537805 XM_011537806 XM_011537809 XM_017018740 XM_017018741 XP_011536103 XP_011536105 XP_011536106 XP_011536107 XP_011536108 XP_011536111 XP_016874229 XP_016874230	30
chr12	56628779	56646476	17698	*	5	4825	19378.2	TRUE	chr12	56638175	56645984	7810	-	56638323	56645963	506	506	ATP5F1B	NM_001686 NP_001677	10
chr2	231706423	231717418	10996	*	4	3826	19355.8	TRUE	chr2	231706895	231713551	6657	+	231707766	231712851	5757	5757	PTMA	NM_001099285 NM_002823 NP_001092755 NP_002814	8
chr11	106076646	106092635	15990	*	5	3932	19255.6	TRUE	chr11	106075501	106098699	23199	+	106077711	106096907	60496	60496	AASDHPPT	NM_015423 NP_056238 XM_024448641 XP_024304409	7
chr11	106076646	106092635	15990	*	5	3932	19255.6	TRUE	chr11	106051098	106077459	26362	-	106052850	106059097	143879	143879	KBTBD3	NM_001330359 NM_152433 NM_198439 NP_001317288 NP_689646 NP_940841 XM_006718767 XM_011542618 XP_006718830 XP_011540920	5
chr5	163503762	163515013	11252	*	3	3046	19252.7	TRUE	chr5	163503114	163519354	16241	+	163503395	163518363	27430	27430	MAT2B	NM_013283 NM_182796 NP_037415 NP_877725	5
chr5	163503762	163515013	11252	*	3	3046	19252.7	TRUE	chr5	163446526	163460102	13577	-	163453967	163460050	134492	134492	NUDCD2	NM_001329991 NM_145266 NP_001316920 NP_660309 NR_138426 NR_138427	5
chr12	120078688	120133553	54866	*	8	6466	19246.6	TRUE	chr12	120095099	120117502	22404	-	120097245	120116650	11021	11021	RAB35	NM_001167606 NM_006861 NP_001161078 NP_006852 XM_011537779 XM_024448801 XP_011536081 XP_024304569	8
chr11	72700963	72722807	21845	*	4	3744	19201.3	TRUE	chr11	72576141	72674591	98451	-	72577384	72674207	5138	5138	PDE2A	NM_001143839 NM_001146209 NM_001243784 NM_002599 NP_001137311 NP_001139681 NP_001230713 NP_002590 XM_005274040 XP_005274097	39
chr21	35025642	35051694	26053	*	7	5156	19176.9	TRUE	chr21	34787801	35049344	261544	-	34792135	35048899	861	861	RUNX1	NM_001001890 NM_001122607 NM_001754 NP_001001890 NP_001116079 NP_001745 XM_005261068 XM_005261069 XM_011529766 XM_011529767 XM_011529768 XM_011529770 XM_017028487 XP_005261125 XP_005261126 XP_011528068 XP_011528069 XP_011528070 XP_011528072 XP_016883976 XR_937576	12
chr12	12691672	12741877	50206	*	5	5603	19129.3	TRUE	chr12	12725917	12814199	88283	+	12726001	12787652	81575	81575	APOLD1	NM_001130415 NM_030817 NP_001123887 NP_110444	7
chr12	12691672	12741877	50206	*	5	5603	19129.3	TRUE	chr12	12725929	12829981	104053	+	12726001	12829554	51202	51202	DDX47	NM_016355 NM_201224 NP_057439 NP_957518	13
chr12	12691672	12741877	50206	*	5	5603	19129.3	TRUE	chr12	12660890	12696207	35318	-	12661201	12662448	2842	2842	GPR19	NM_006143 NP_006134 XM_011520623 XM_011520624 XM_011520625 XM_017019212 XM_017019213 XM_017019214 XM_017019216 XP_011518925 XP_011518926 XP_011518927 XP_016874701 XP_016874702 XP_016874703 XP_016874705	5
chr21	42449995	42535145	85151	*	11	10183	19087.2	TRUE	chr21	42496018	42581440	85423	+	42518455	42580360	54020	54020	SLC37A1	NM_001320537 NM_018964 NP_001307466 NP_061837 XM_011529614 XM_011529615 XM_017028376 XM_017028377 XM_017028378 XM_017028379 XM_017028380 XM_017028381 XM_017028382 XM_017028383 XP_011527916 XP_011527917 XP_016883865 XP_016883866 XP_016883867 XP_016883868 XP_016883869 XP_016883870 XP_016883871 XP_016883872	26
chr21	42449995	42535145	85151	*	11	10183	19087.2	TRUE	chr21	42472486	42496246	23761	-	42472818	42496186	89765	89765	RSPH1	NM_001286506 NM_080860 NP_001273435 NP_543136 XM_005261208 XM_011529786 XP_005261265 XP_011528088	8
chr20	44959577	44998177	38601	*	9	5821	18983.5	TRUE	chr20	44966479	45080021	113543	+	44966569	45075176	6789	6789	STK4	NM_001352385 NM_006282 NP_001339314 NP_006273 NR_147974 NR_147975 XM_005260530 XM_005260531 XM_005260532 XM_011529018 XM_011529020 XM_017028029 XM_017028030 XM_017028031 XM_017028032 XM_017028033 XP_005260587 XP_005260588 XP_005260589 XP_011527320 XP_011527322 XP_016883518 XP_016883519 XP_016883520 XP_016883521 XP_016883522	15
chr20	44959577	44998177	38601	*	9	5821	18983.5	TRUE	chr20	44942130	44960397	18268	-	44943109	44960333	10953	10953	TOMM34	NM_006809 NP_006800 XM_005260254 XM_011528501 XM_017027600 XP_005260311 XP_011526803 XP_016883089 XR_244131	7
chr5	123511776	123549843	38068	*	7	5679	18949.8	TRUE	chr5	123512099	123617045	104947	+	123545664	123614396	1456	1456	CSNK1G3	NM_001031812 NM_001044722 NM_001044723 NM_001270572 NM_001270573 NM_001270574 NM_001364140 NM_001364141 NM_001364143 NM_001364144 NM_001364145 NM_001364146 NM_001364147 NM_001364148 NM_001364149 NM_001364150 NM_004384 NP_001026982 NP_001038188 NP_001257501 NP_001257502 NP_001257503 NP_001351069 NP_001351070 NP_001351072 NP_001351073 NP_001351074 NP_001351075 NP_001351076 NP_001351077 NP_001351078…	14
chr19	48608732	48646698	37967	*	7	4450	18929.8	TRUE	chr19	48630030	48637379	7350	-	48630837	48636994	1628	1628	DBP	NM_001352 NP_001343 XM_017026388 XP_016881877 XR_243907	2
chr19	48608732	48646698	37967	*	7	4450	18929.8	TRUE	chr19	48606742	48607714	973	+	48606979	48607353	171169	171169	SPACA4	NM_133498 NP_598005	1
chr19	48608732	48646698	37967	*	7	4450	18929.8	TRUE	chr19	48695971	48705951	9981	+	48702957	48703988	2524	2524	FUT2	NM_000511 NM_001097638 NP_000502 NP_001091107	3
chr19	48608732	48646698	37967	*	7	4450	18929.8	TRUE	chr19	48599961	48615076	15116	-	48601109	48613372	54854	54854	FAM83E	NM_017708 NP_060178 XM_005259019 XM_011527049 XM_024451561 XP_005259076 XP_011525351 XP_024307329	7
chr19	48608732	48646698	37967	*	7	4450	18929.8	TRUE	chr19	48619291	48630717	11427	+	48620515	48630717	56848	56848	SPHK2	NM_001204158 NM_001204159 NM_001204160 NM_001243876 NM_020126 NP_001191087 NP_001191088 NP_001191089 NP_001230805 NP_064511 XM_006723292 XM_011527133 XM_011527134 XM_017027008 XM_017027010 XP_006723355 XP_011525435 XP_011525436 XP_016882497 XP_016882499	9
chr19	48608732	48646698	37967	*	7	4450	18929.8	TRUE	chr19	48615328	48619184	3857	-	48615330	48619143	6141	6141	RPL18	NM_000979 NM_001270490 NP_000970 NP_001257419 NR_073022	3
chr19	48608732	48646698	37967	*	7	4450	18929.8	TRUE	chr19	48637946	48646187	8242	-	48638119	48645632	770	770	CA11	NM_001217 NP_001208 NR_136241 XR_002958355	10
chr11	83054827	83080304	25478	*	4	5217	18873.4	TRUE	chr11	82973133	83071923	98791	-	82982165	82997316	27314	27314	RAB30	NM_001286059 NM_001286060 NM_001286061 NM_014488 NP_001272988 NP_001272989 NP_001272990 NP_055303	11
chr14	81519017	81534048	15032	*	4	3064	18860.9	TRUE	chr14	81471547	81533853	62307	-	81476972	81533744	6400	6400	SEL1L	NM_001244984 NM_005065 NP_001231913 NP_005056 XM_005267988 XM_005267989 XP_005268045 XP_005268046	21
chr5	172174695	172188784	14090	*	4	4998	18820.6	TRUE	chr5	172194172	172203454	9283	+	172194173	172203345	285588	285588	EFCAB9	NM_001171183 NP_001164654	4
chr5	172174695	172188784	14090	*	4	4998	18820.6	TRUE	chr5	172042079	172188224	146146	-	172044817	172188042	6793	6793	STK10	NM_005990 NP_005981 XM_017009788 XP_016865277	23
chr8	97624357	97653253	28897	*	5	5202	18800.8	TRUE	chr8	97644184	97730260	86077	+	97644507	97724670	92140	92140	MTDH	NM_001363136 NM_001363137 NM_001363138 NM_001363139 NM_178812 NP_001350065 NP_001350066 NP_001350067 NP_001350068 NP_848927 XM_011517368 XM_011517369 XM_011517370 XM_017013968 XP_011515670 XP_011515671 XP_011515672 XP_016869457	12
chr12	108540913	108569216	28304	*	6	4799	18787.5	TRUE	chr12	108562582	108569368	6787	+	108562623	108568916	23479	23479	ISCU	NM_001301140 NM_001301141 NM_001320042 NM_014301 NM_213595 NP_001288069 NP_001288070 NP_001306971 NP_055116 NP_998760 NR_135127 XM_011538100 XM_011538101 XP_011536402 XP_011536403	3
chr12	108540913	108569216	28304	*	6	4799	18787.5	TRUE	chr12	108522214	108561173	38960	-	108523457	108561154	9733	9733	SART3	NM_014706 NP_055521 XM_005269241 XM_024449284 XP_005269298 XP_024305052	23
chr17	45132639	45173350	40712	*	5	5661	18780	TRUE	chr17	45132600	45144181	11582	+	45136145	45143641	79777	79777	ACBD4	NM_001135704 NM_001135705 NM_001135706 NM_001135707 NM_001321352 NM_001321353 NM_001378111 NM_001378112 NM_024722 NP_001129177 NP_001129178 NP_001129179 NP_001308281 NP_001308282 NP_001365040 NP_001365041 NP_078998 XM_006722085 XM_011525259 XM_011525261 XM_017025084 XM_017025085 XM_017025086 XM_017025087 XM_017025088 XM_017025089 XM_017025090 XM_017025091 XM_017025092 XM_017025093 XM_017025095 XM…	11
chr17	45132639	45173350	40712	*	5	5661	18780	TRUE	chr17	45148475	45152099	3625	+	45149191	45150270	10614	10614	HEXIM1	NM_006460 NP_006451	1
chr17	45132639	45173350	40712	*	5	5661	18780	TRUE	chr17	45160700	45170040	9341	+	45162794	45169809	124790	124790	HEXIM2	NM_001303436 NM_001303437 NM_001303438 NM_001303439 NM_001303440 NM_001303441 NM_001303442 NM_001303443 NM_001303444 NM_144608 NP_001290365 NP_001290366 NP_001290367 NP_001290368 NP_001290369 NP_001290370 NP_001290371 NP_001290372 NP_001290373 NP_653209 XM_006721687 XM_011524306 XM_011524307 XM_011524308 XM_017024167 XM_017024170 XM_024450566 XM_024450567 XM_024450568 XP_006721750 XP_011522608 XP…	6
chr17	45132639	45173350	40712	*	5	5661	18780	TRUE	chr17	45108959	45133354	24396	-	45112616	45133344	113026	113026	PLCD3	NM_133373 NP_588614 XM_011524253 XM_024450554 XP_011522555 XP_024306322	17
chr17	45132639	45173350	40712	*	5	5661	18780	TRUE	chr17	45221885	45247319	25435	+	45222125	45246970	752	752	FMNL1	NM_005892 NP_005883 XM_006722062 XM_006722063 XM_006722064 XM_006722065 XM_006722066 XM_006722069 XM_006722070 XM_011525179 XM_011525180 XM_011525182 XP_006722125 XP_006722126 XP_006722127 XP_006722128 XP_006722129 XP_006722132 XP_006722133 XP_011523481 XP_011523482 XP_011523484	21
chr10	22219438	22259764	40327	*	7	5283	18763.7	TRUE	chr10	22208475	22218015	9541	-	22208883	22209983	340900	340900	EBLN1	NM_001199938 NM_001394757 NP_001186867 NP_001381686	3
chr19	49869268	49878112	8845	*	2	3021	18755.5	TRUE	chr19	49860099	49878351	18253	-	49860099	49867204	11284	11284	PNKP	NM_007254 NP_009185	16
chr19	49869268	49878112	8845	*	2	3021	18755.5	TRUE	chr19	49877666	49888750	11085	+	49877724	49888624	79735	79735	TBC1D17	NM_001168222 NM_024682 NP_001161694 NP_078958 XM_011527317 XP_011525619	18
chr19	49869268	49878112	8845	*	2	3021	18755.5	TRUE	chr19	49869033	49878459	9427	-	49869917	49876655	84335	84335	AKT1S1	NM_001098632 NM_001098633 NM_001278159 NM_001278160 NM_032375 NP_001092102 NP_001092103 NP_001265088 NP_001265089 NP_115751	7
chr1	154961289	155002235	40947	*	4	4402	18736.8	TRUE	chr1	154974653	154979251	4599	+	154974746	154978777	1163	1163	CKS1B	NM_001826 NP_001817 NR_024163	5
chr1	154961289	155002235	40947	*	4	4402	18736.8	TRUE	chr1	154924740	154936719	11980	-	154925129	154936685	10654	10654	PMVK	NM_001323011 NM_001323012 NM_001348696 NM_006556 NP_001309940 NP_001309941 NP_001335625 NP_006547	5
chr1	154961289	155002235	40947	*	4	4402	18736.8	TRUE	chr1	154983338	154993111	9774	+	154983695	154993037	80308	80308	FLAD1	NM_001184891 NM_001184892 NM_025207 NM_201398 NP_001171820 NP_001171821 NP_079483 NP_958800	5
chr1	154961289	155002235	40947	*	4	4402	18736.8	TRUE	chr1	154993586	154994315	730	+	154993608	154993793	55891	55891	LENEP	NM_001394530 NM_018655 NP_001381459 NP_061125	1
chr1	154961289	155002235	40947	*	4	4402	18736.8	TRUE	chr1	154944076	154956123	12048	-	154945024	154953721	57326	57326	PBXIP1	NM_001317734 NM_001317735 NM_020524 NP_001304663 NP_001304664 NP_065385	10
chr1	154961289	155002235	40947	*	4	4402	18736.8	TRUE	chr1	155002630	155018523	15894	+	155010920	155016685	51043	51043	ZBTB7B	NM_001252406 NM_001256455 NM_001377451 NM_001377452 NM_001377453 NM_001377454 NM_001377455 NP_001239335 NP_001243384 NP_001364380 NP_001364381 NP_001364382 NP_001364383 NP_001364384 XM_006711354 XM_006711356 XM_006711357 XM_006711358 XM_006711359 XM_011509598 XM_011509599 XM_017001399 XP_006711417 XP_006711419 XP_006711420 XP_006711421 XP_006711422 XP_011507900 XP_011507901 XP_016856888	6
chr1	154961289	155002235	40947	*	4	4402	18736.8	TRUE	chr1	154957026	154963853	6828	-	154958779	154961576	90780	90780	PYGO2	NM_138300 NP_612157	5
chr1	154961289	155002235	40947	*	4	4402	18736.8	TRUE	chr1	154962298	154974395	12098	-	154963803	154970526	6464	6464	SHC1	NM_001130040 NM_001130041 NM_001202859 NM_003029 NM_183001 NP_001123512 NP_001123513 NP_001189788 NP_003020 NP_892113 XM_005245449 XM_005245451 XM_011509892 XM_011509893 XM_011509894 XM_011509897 XM_011509898 XM_017002081 XM_017002082 XM_017002083 XM_024449083 XM_024449084 XP_005245506 XP_005245508 XP_011508194 XP_011508195 XP_011508196 XP_011508199 XP_011508200 XP_016857570 XP_016857571 XP_01685…	14
chr1	154961289	155002235	40947	*	4	4402	18736.8	TRUE	chr1	155033824	155050930	17107	+	155034037	155050868	149095	149095	DCST1	NM_001143687 NM_152494 NP_001137159 NP_689707	18
chr1	154961289	155002235	40947	*	4	4402	18736.8	TRUE	chr1	155050566	155062775	12210	+	155051387	155062502	8751	8751	ADAM15	NM_001261464 NM_001261465 NM_001261466 NM_003815 NM_207191 NM_207194 NM_207195 NM_207196 NM_207197 NP_001248393 NP_001248394 NP_001248395 NP_003806 NP_997074 NP_997077 NP_997078 NP_997079 NP_997080 NR_048577 NR_048578 NR_048579	22
chr20	46089146	46121286	32141	*	5	4508	18724.8	TRUE	chr20	46118278	46129863	11586	+	46118344	46129040	958	958	CD40	NM_001250 NM_001302753 NM_001322421 NM_001322422 NM_001362758 NM_152854 NP_001241 NP_001289682 NP_001309350 NP_001309351 NP_001349687 NP_690593 NR_126502 NR_136327 XM_005260619 XM_011529109 XM_017028135 XM_017028136 XP_005260676 XP_011527411 XP_016883624 XP_016883625	10
chr20	46089146	46121286	32141	*	5	4508	18724.8	TRUE	chr20	46060991	46089962	28972	-	46062300	46079424	57727	57727	NCOA5	NM_001348148 NM_001348149 NM_001348150 NM_001348151 NM_020967 NP_001335077 NP_001335078 NP_001335079 NP_001335080 NP_066018	8
chr9	137188304	137223991	35688	*	5	5613	18710.7	TRUE	chr9	137188660	137190370	1711	+	137188727	137189914	8636	8636	SSNA1	NM_003731 NP_003722	2
chr9	137188304	137223991	35688	*	5	5613	18710.7	TRUE	chr9	137205685	137219361	13677	+	137205778	137216416	27158	27158	NDOR1	NM_001144026 NM_001144027 NM_001144028 NM_014434 NP_001137498 NP_001137499 NP_001137500 NP_055249	13
chr9	137188304	137223991	35688	*	5	5613	18710.7	TRUE	chr9	137168758	137171984	3227	-	137168854	137171984	389816	389816	LRRC26	NM_001013653 NP_001013675	4
chr9	137188304	137223991	35688	*	5	5613	18710.7	TRUE	chr9	137170858	137172056	1199	-	137170975	137172027	100505993	100505993	TMEM210	NM_001282477 NP_001269406	4
chr9	137188304	137223991	35688	*	5	5613	18710.7	TRUE	chr9	137217452	137219361	1910	+	137217997	137218602	122513141	122513141	LOC122513141	NM_001395982 NP_001382911	1
chr9	137188304	137223991	35688	*	5	5613	18710.7	TRUE	chr9	137224635	137226315	1681	+	137225122	137226056	375791	375791	CYSRT1	NM_199001 NP_945352	2
chr9	137188304	137223991	35688	*	5	5613	18710.7	TRUE	chr9	137227502	137229640	2139	+	137228336	137229086	643596	643596	RNF224	NM_001190228 NP_001177157 XM_011518914 XP_011517216	3
chr9	137188304	137223991	35688	*	5	5613	18710.7	TRUE	chr9	137230757	137236555	5799	+	137231703	137236416	142680	142680	SLC34A3	NM_001177316 NM_001177317 NM_080877 NP_001170787 NP_001170788 NP_543153 XM_011518257 XM_011518258 XM_011518259 XM_011518260 XM_011518261 XM_017014290 XM_017014291 XM_017014292 XP_011516559 XP_011516560 XP_011516561 XP_011516562 XP_011516563 XP_016869779 XP_016869780 XP_016869781	13
chr9	137188304	137223991	35688	*	5	5613	18710.7	TRUE	chr9	137174784	137188560	13777	-	137174942	137188532	29882	29882	ANAPC2	NM_013366 NP_037498 XR_929779 XR_929780 XR_929781	12
chr9	137188304	137223991	35688	*	5	5613	18710.7	TRUE	chr9	137241287	137243707	2421	+	137241361	137243556	10383	10383	TUBB4B	NM_006088 NP_006079	3
chr9	137188304	137223991	35688	*	5	5613	18710.7	TRUE	chr9	137191617	137204193	12577	-	137192112	137200711	286262	286262	TPRN	NM_001128228 NM_173691 NP_001121700	4
chr9	137188304	137223991	35688	*	5	5613	18710.7	TRUE	chr9	137204082	137205648	1567	-	137205004	137205414	94107	94107	TMEM203	NM_053045 NP_444273	1
chr9	137188304	137223991	35688	*	5	5613	18710.7	TRUE	chr9	137251261	137253483	2223	+	137251287	137253463	441476	441476	STPG3	NM_001004353 NM_001256699 NM_001256700 NM_001256701 NP_001004353 NP_001243628 NP_001243629 NP_001243630 NR_046339 NR_046340 XM_006717113 XM_006717115 XP_006717176 XP_006717178	5
chr9	137188304	137223991	35688	*	5	5613	18710.7	TRUE	chr9	137255327	137273542	18216	+	137255366	137272928	25920	25920	NELFB	NM_015456 NP_056271	13
chr9	137188304	137223991	35688	*	5	5613	18710.7	TRUE	chr9	137220259	137222240	1982	-	137220427	137221212	727800	727800	RNF208	NM_001388297 NM_001388298 NM_031297 NP_001375226 NP_001375227 NP_112587	2
chr20	25271656	25364843	93188	*	7	5032	18695.7	TRUE	chr20	25407673	25452628	44956	+	25407821	25445991	9837	9837	GINS1	NM_021067 NP_066545 NR_134574 XM_017028162 XP_016883651 XR_244227 XR_937180	10
chr19	49656089	49678916	22828	*	5	4186	18683.9	TRUE	chr19	49690898	49713731	22834	+	49692253	49713667	126129	126129	CPT1C	NM_001136052 NM_001199752 NM_001199753 NM_001378482 NM_001378483 NM_001378484 NM_001378485 NM_001378486 NM_001378487 NM_001378488 NM_152359 NP_001129524 NP_001186681 NP_001186682 NP_001365411 NP_001365412 NP_001365413 NP_001365414 NP_001365415 NP_001365416 NP_001365417 NP_689572 NR_108072 XM_006723009 XM_017026267 XM_017026268 XM_017026269 XM_017026271 XM_017026272 XM_017026273 XM_024451348 XM_02…	19
chr19	49656089	49678916	22828	*	5	4186	18683.9	TRUE	chr19	49689594	49690575	982	+	49689838	49690493	199800	199800	ADM5	NM_001101340 NP_001094810	2
chr19	49656089	49678916	22828	*	5	4186	18683.9	TRUE	chr19	49675786	49689029	13244	+	49677281	49688245	3276	3276	PRMT1	NM_001207042 NM_001536 NM_198318 NM_198319 NP_001193971 NP_001527 NP_938074 NR_033397 XM_005258842 XM_017026734 XM_017026735 XM_017026736 XP_005258899 XP_016882223 XP_016882224 XP_016882225	15
chr19	49656089	49678916	22828	*	5	4186	18683.9	TRUE	chr19	49659569	49665875	6307	-	49659589	49664838	3661	3661	IRF3	NM_001197122 NM_001197123 NM_001197124 NM_001197125 NM_001197126 NM_001197127 NM_001197128 NM_001571 NP_001184051 NP_001184052 NP_001184053 NP_001184054 NP_001184055 NP_001184056 NP_001184057 NP_001562 NR_045568 XM_006723197 XM_006723198 XM_006723200 XM_006723201 XM_017026766 XM_017026767 XM_024451492 XM_024451493 XM_024451494 XM_024451495 XM_024451496 XM_024451497 XM_024451498 XP_006723260 XP_00…	6
chr19	49656089	49678916	22828	*	5	4186	18683.9	TRUE	chr19	49635292	49640143	4852	-	49635576	49640098	6237	6237	RRAS	NM_006270 NP_006261	5
chr19	49656089	49678916	22828	*	5	4186	18683.9	TRUE	chr19	49665142	49673916	8775	+	49665824	49673777	83596	83596	BCL2L12	NM_001040668 NM_001282516 NM_001282517 NM_001282519 NM_001282520 NM_001282521 NM_001385706 NM_138639 NP_001035758 NP_001269445 NP_001269446 NP_001269448 NP_001269449 NP_001269450 NP_001372635 NP_619580 NR_104200 NR_104201 NR_104202 NR_104203 NR_104204 NR_104205 XM_017027346 XP_016882835	7
chr12	124914443	124940842	26400	*	7	5063	18635.1	TRUE	chr12	124776856	124882668	105813	-	124778467	124863720	949	949	SCARB1	NM_001082959 NM_001367981 NM_001367982 NM_001367983 NM_001367984 NM_001367985 NM_001367986 NM_001367987 NM_001367988 NM_001367989 NM_005505 NP_001076428 NP_001354910 NP_001354911 NP_001354912 NP_001354913 NP_001354914 NP_001354915 NP_001354916 NP_001354917 NP_001354918 NP_005496 NR_160416 NR_160417 NR_160418 NR_160419 NR_160420 NR_160421 NR_160422 NR_160423 NR_160424	17
chr12	124914443	124940842	26400	*	7	5063	18635.1	TRUE	chr12	124911646	124917368	5723	-	124911714	124913771	7316	7316	UBC	NM_021009 NP_066289	4
chr14	24429371	24443006	13636	*	3	2981	18624	TRUE	chr14	24429286	24441843	12558	+	24430731	24437285	23351	23351	KHNYN	NM_001290256 NM_001290257 NM_015299 NP_001277185 NP_001277186 NP_056114 XM_005267474 XM_011536590 XM_017021114 XP_005267531 XP_011534892 XP_016876603 XR_001750203 XR_002957541 XR_943407	9
chr14	24429371	24443006	13636	*	3	2981	18624	TRUE	chr14	24426545	24430954	4410	-	24427789	24430885	643866	643866	CBLN3	NM_001039771 NP_001034860	4
chr14	24429371	24443006	13636	*	3	2981	18624	TRUE	chr14	24439766	24442905	3140	-	24440083	24442769	56948	56948	SDR39U1	NM_001290292 NM_001290293 NM_001308075 NM_001387322 NM_001387323 NM_001387324 NM_001387325 NM_001387326 NM_001387327 NM_020195 NP_001277221 NP_001277222 NP_001295004 NP_001374251 NP_001374252 NP_001374253 NP_001374254 NP_001374255 NP_001374256 NP_064580	3
chr10	102379949	102432977	53029	*	4	4476	18595	TRUE	chr10	102394110	102402524	8415	+	102395960	102402376	4791	4791	NFKB2	NM_001077494 NM_001261403 NM_001288724 NM_001322934 NM_001322935 NM_002502 NP_001070962 NP_001248332 NP_001275653 NP_001309863 NP_001309864 NP_002493	22
chr10	102379949	102432977	53029	*	4	4476	18595	TRUE	chr10	102419189	102423136	3948	+	102420117	102422993	79176	79176	FBXL15	NM_001387294 NM_024326 NP_001374223 NP_077302 XM_005270149 XM_005270151 XM_017016631 XP_005270206 XP_005270208 XP_016872120	6
chr10	102379949	102432977	53029	*	4	4476	18595	TRUE	chr10	102461395	102477045	15651	+	102469030	102475984	79847	79847	MFSD13A	NM_024789 NP_079065 XM_006717973 XM_006717974 XM_011540160 XM_011540163 XM_011540167 XM_011540169 XM_017016654 XM_017016655 XM_017016656 XM_017016657 XM_017016658 XM_017016660 XM_017016661 XM_017016662 XM_024448171 XM_024448172 XM_024448173 XP_006718036 XP_006718037 XP_011538462 XP_011538465 XP_011538469 XP_011538471 XP_016872143 XP_016872144 XP_016872145 XP_016872146 XP_016872147 XP_016872149 XP…	13
chr10	102379949	102432977	53029	*	4	4476	18595	TRUE	chr10	102402617	102421539	18923	-	102403200	102417038	5662	5662	PSD	NM_001270965 NM_001270966 NM_002779 NP_001257894 NP_001257895 NP_002770 NR_073110 XM_011539968 XM_011539969 XM_017016433 XM_017016434 XP_011538270 XP_011538271 XP_016871922 XP_016871923	21
chr10	102379949	102432977	53029	*	4	4476	18595	TRUE	chr10	102423245	102432584	9340	-	102423426	102425188	79004	79004	CUEDC2	NM_024040 NP_076945	7
chr3	101665883	101701799	35917	*	5	4592	18586.5	TRUE	chr3	101648889	101677135	28247	-	101651166	101676914	27107	27107	ZBTB11	NM_014415 NP_055230 XM_011512689 XM_011512690 XP_011510991 XP_011510992	12
chr3	101665883	101701799	35917	*	5	4592	18586.5	TRUE	chr3	101724593	101770562	45970	+	101724677	101765551	79598	79598	CEP97	NM_001303401 NM_024548 NP_001290330 NP_078824 XM_006713743 XM_011513127 XM_017007178 XP_006713806 XP_011511429 XP_016862667	12
chr3	101665883	101701799	35917	*	5	4592	18586.5	TRUE	chr3	101681091	101686718	5628	-	101681135	101686676	6152	6152	RPL24	NM_000986 NP_000977	3
chr5	72274402	72320901	46500	*	7	4214	18585.7	TRUE	chr5	72320367	72368395	48029	+	72320383	72358427	79810	79810	PTCD2	NM_001284403 NM_001284404 NM_001284405 NM_024754 NP_001271332 NP_001271333 NP_001271334 NP_079030 XM_005248601 XM_005248603 XM_017009866 XM_017009867 XM_017009868 XP_005248658 XP_005248660 XP_016865355 XP_016865356 XP_016865357 XR_001742270 XR_241790 XR_948298	11
chr5	72274402	72320901	46500	*	7	4214	18585.7	TRUE	chr5	72219403	72320646	101244	-	72220909	72320221	23107	23107	MRPS27	NM_001286748 NM_001286751 NM_015084 NP_001273677 NP_001273680 NP_055899	17
chr3	129428580	129441245	12666	*	2	2155	18574.5	TRUE	chr3	129429607	129520510	90904	+	129440331	129520323	55764	55764	IFT122	NM_001280541 NM_001280545 NM_001280546 NM_018262 NM_052985 NM_052989 NM_052990 NP_001267470 NP_001267474 NP_001267475 NP_060732 NP_443711 NP_443715 NP_443716 XM_005247609 XM_006713689 XM_006713691 XM_006713692 XM_006713695 XM_011512972 XM_017006817 XM_017006818 XM_017006819 XM_017006820 XM_017006821 XM_017006822 XM_017006823 XM_017006824 XM_017006825 XM_017006826 XM_017006827 XM_017006828 XM_0170…	36
chr3	129428580	129441245	12666	*	2	2155	18574.5	TRUE	chr3	129401321	129428651	27331	-	129401593	129428488	90288	90288	EFCAB12	NM_207307 NP_997190 XM_011513293 XM_011513294 XM_011513295 XM_011513297 XM_011513298 XM_011513299 XP_011511595 XP_011511596 XP_011511597 XP_011511599 XP_011511600 XP_011511601	7
chr3	129428580	129441245	12666	*	2	2155	18574.5	TRUE	chr3	129430947	129440179	9233	-	129431501	129439833	8930	8930	MBD4	NM_001276270 NM_001276271 NM_001276272 NM_001276273 NM_003925 NP_001263199 NP_001263200 NP_001263201 NP_001263202 NP_003916 XM_024453810 XP_024309578	7
chr3	113736738	113747760	11023	*	2	3623	18475.1	TRUE	chr3	113648385	113696646	48262	-	113649840	113674878	205717	205717	USF3	NM_001009899 NP_001009899 NR_111981 XM_005247208 XM_017005871 XM_017005872 XM_024453391 XM_024453392 XP_005247265 XP_016861360 XP_016861361 XP_024309159 XP_024309160	7
chr3	113736738	113747760	11023	*	2	3623	18475.1	TRUE	chr3	113747033	113812056	65024	+	113778754	113809427	523	523	ATP6V1A	NM_001690 NP_001681	19
chr3	113736738	113747760	11023	*	2	3623	18475.1	TRUE	chr3	113716458	113746300	29843	-	113721760	113745949	80218	80218	NAA50	NM_001308445 NM_025146 NP_001295374 NP_079422	8
chr1	110619475	110647970	28496	*	5	3880	18464.8	TRUE	chr1	110519837	110631474	111638	-	110593893	110604782	3737	3737	KCNA2	NM_001204269 NM_004974 NP_001191198 NP_004965 XM_011541396 XM_011541397 XM_011541398 XM_011541399 XM_011541400 XM_017001213 XP_011539698 XP_011539699 XP_011539700 XP_011539701 XP_011539702 XP_016856702	17
chr15	64151733	64164245	12513	*	2	3817	18441.4	TRUE	chr15	64151715	64157481	5767	+	64151776	64154508	79856	79856	SNX22	NM_024798 NP_079074 NR_073534 XM_005254677 XM_017022581 XP_005254734 XP_016878070	1
chr15	64151733	64164245	12513	*	2	3817	18441.4	TRUE	chr15	64155740	64163134	7395	-	64156023	64162986	5479	5479	PPIB	NM_000942 NP_000933	5
chr9	97627587	97634356	6770	*	2	2580	18424.5	TRUE	chr9	97633668	97673748	40081	+	97633882	97671199	4686	4686	NCBP1	NM_001351504 NM_001351505 NM_001351506 NM_001351507 NM_002486 NP_001338433 NP_001338434 NP_001338435 NP_001338436 NP_002477	23
chr9	97627587	97634356	6770	*	2	2580	18424.5	TRUE	chr9	97600080	97633368	33289	-	97602469	97627562	158427	158427	TSTD2	NM_139246 NP_640339	11
chr17	7549230	7584484	35255	*	6	6173	18377.9	TRUE	chr17	7549058	7557890	8833	+	7549154	7557350	8742	8742	TNFSF12	NM_003809 NP_003800 NR_037146	9
chr17	7549230	7584484	35255	*	6	6173	18377.9	TRUE	chr17	7549099	7561601	12503	+	7549154	7560833	407977	407977	TNFSF12-TNFSF13	NM_172089 NP_742086	11
chr17	7549230	7584484	35255	*	6	6173	18377.9	TRUE	chr17	7558292	7561608	3317	+	7559040	7561005	8741	8741	TNFSF13	NM_001198622 NM_001198623 NM_001198624 NM_003808 NM_172087 NM_172088 NP_001185551 NP_001185552 NP_001185553 NP_003799 NP_742084 NP_742085 NR_073490	6
chr17	7549230	7584484	35255	*	6	6173	18377.9	TRUE	chr17	7561919	7571969	10051	+	7563077	7571808	26168	26168	SENP3	NM_015670 NP_056485	9
chr17	7549230	7584484	35255	*	6	6173	18377.9	TRUE	chr17	7563287	7578715	15429	+	7563287	7572395	100533955	100533955	SENP3-EIF4A1	NR_037926	20
chr17	7549230	7584484	35255	*	6	6173	18377.9	TRUE	chr17	7572825	7582024	9200	+	7572842	7578486	1973	1973	EIF4A1	NM_001204510 NM_001416 NP_001191439 NP_001407	10
chr17	7549230	7584484	35255	*	6	6173	18377.9	TRUE	chr17	7579491	7582111	2621	+	7579678	7581511	968	968	CD68	NM_001040059 NM_001251 NP_001035148 NP_001242	5
chr17	7549230	7584484	35255	*	6	6173	18377.9	TRUE	chr17	7583666	7592789	9124	+	7583863	7592494	9526	9526	MPDU1	NM_001330073 NM_004870 NP_001317002 NP_004861 NR_024603 XM_006721597 XM_006721598 XM_011524081 XM_024451040 XP_006721660 XP_006721661 XP_011522383 XP_024306808	5
chr17	7549230	7584484	35255	*	6	6173	18377.9	TRUE	chr17	7614064	7633382	19319	+	7630173	7633352	6462	6462	SHBG	NM_001040 NM_001146279 NM_001146280 NM_001146281 NM_001289113 NM_001289114 NM_001289115 NM_001289116 NP_001031 NP_001139751 NP_001139752 NP_001139753 NP_001276042 NP_001276043 NP_001276044 NP_001276045	8
chr1	16739959	16761267	21309	*	4	3217	18373.9	TRUE	chr1	16740273	16972964	232692	+	16922019	16972446	9696	9696	CROCC	NM_014675 NP_055490 XM_006711058 XM_011542468 XM_011542470 XM_017002913 XM_017002914 XM_017002915 XM_024451090 XM_024451092 XP_006711121 XP_011540770 XP_011540772 XP_016858402 XP_016858403 XP_016858404 XP_024306858 XP_024306860 XR_002958163 XR_002958164	39
chr11	119084657	119108360	23704	*	4	5177	18312.9	TRUE	chr11	119084866	119093834	8969	+	119085034	119093283	3145	3145	HMBS	NM_000190 NM_001024382 NM_001258208 NM_001258209 NP_000181 NP_001019553 NP_001245137 NP_001245138 XM_005271531 XM_005271532 XM_005271533 XM_011542796 XM_017017629 XM_024448460 XP_005271588 XP_005271589 XP_005271590 XP_011541098 XP_016873118 XP_024304228	8
chr11	119084657	119108360	23704	*	4	5177	18312.9	TRUE	chr11	119102198	119118544	16347	+	119107742	119116256	9854	9854	C2CD2L	NM_001290474 NM_001382611 NM_001382612 NM_001382613 NM_014807 NP_001277403 NP_001369540 NP_001369541 NP_001369542 NP_055622 XM_006718948 XM_011543076 XM_017018626 XM_017018627 XM_017018628 XP_006719011 XP_011541378 XP_016874115 XP_016874116 XP_016874117 XR_001748053 XR_001748054	9
chr11	119084657	119108360	23704	*	4	5177	18312.9	TRUE	chr11	119121580	119136059	14480	+	119126945	119134498	25988	25988	HINFP	NM_001243259 NM_001351957 NM_001351958 NM_001351959 NM_001351960 NM_001351961 NM_001351962 NM_001351963 NM_001351964 NM_001351965 NM_001351966 NM_001351969 NM_001351971 NM_001351972 NM_001351974 NM_015517 NM_198971 NP_001230188 NP_001338886 NP_001338887 NP_001338888 NP_001338889 NP_001338890 NP_001338891 NP_001338892 NP_001338893 NP_001338894 NP_001338895 NP_001338898 NP_001338900 NP_001338901 NP…	8
chr11	119084657	119108360	23704	*	4	5177	18312.9	TRUE	chr11	119093874	119095465	1592	-	119094963	119095394	3014	3014	H2AX	NM_002105 NP_002096	1
chr11	119084657	119108360	23704	*	4	5177	18312.9	TRUE	chr11	119149052	119162653	13602	+	119149966	119161106	64137	64137	ABCG4	NM_001142505 NM_001348191 NM_001348192 NM_022169 NP_001135977 NP_001335120 NP_001335121 NP_071452 XM_011542952 XP_011541254	14
chr11	119084657	119108360	23704	*	4	5177	18312.9	TRUE	chr11	119096025	119108331	12307	-	119096998	119102371	1798	1798	DPAGT1	NM_001382 NM_203316 NP_001373 XM_005271422 XM_011542648 XM_017017293 XM_017017294 XM_017017295 XP_005271479 XP_011540950 XP_016872782 XP_016872783 XP_016872784 XR_001747785 XR_947801	3
chr3	156664436	156690182	25747	*	6	4603	18305.4	TRUE	chr3	156673235	156706770	33536	+	156677698	156705131	25976	25976	TIPARP	NM_001184717 NM_001184718 NM_015508 NP_001171646 NP_001171647 NP_056323	11
chr9	114607367	114617486	10120	*	3	2952	18287.1	TRUE	chr9	114611206	114646422	35217	+	114617196	114643313	203197	203197	TMEM268	NM_001330760 NM_153045 NP_001317689 NP_694590 XM_011518350 XM_011518351 XM_011518352 XM_011518353 XM_011518354 XM_011518355 XM_017014429 XM_017014430 XM_024447441 XP_011516652 XP_011516653 XP_011516654 XP_011516655 XP_011516656 XP_011516657 XP_016869918 XP_016869919 XP_024303209 XR_001746225 XR_001746226	9
chr5	177497405	177517667	20263	*	4	4891	18280.4	TRUE	chr5	177456608	177474401	17794	-	177457433	177473521	1627	1627	DBN1	NM_001363541 NM_001364151 NM_001364152 NM_001393630 NM_001393631 NM_004395 NM_080881 NP_001350470 NP_001351080 NP_001351081 NP_001380559 NP_001380560 NP_004386 NP_543157 XM_011534447 XM_017009139 XM_017009140 XP_011532749 XP_016864628 XP_016864629	15
chr5	177497405	177517667	20263	*	4	4891	18280.4	TRUE	chr5	177483394	177497606	14213	-	177483644	177496512	9260	9260	PDLIM7	NM_005451 NM_203352 NM_203353 NM_213636 NP_005442 NP_976227 NP_998801 NR_103804	14
chr5	177497405	177517667	20263	*	4	4891	18280.4	TRUE	chr5	177501904	177511274	9371	-	177503045	177509540	79930	79930	DOK3	NM_001144875 NM_001144876 NM_001308235 NM_001308236 NM_001375794 NM_001375795 NM_001375796 NM_001375797 NM_001375798 NM_001375799 NM_001384137 NM_001384138 NM_001384139 NM_024872 NP_001138347 NP_001138348 NP_001295164 NP_001295165 NP_001362723 NP_001362724 NP_001362725 NP_001362726 NP_001362727 NP_001362728 NP_001371066 NP_001371067 NP_001371068 NP_079148 XM_011534657 XM_017009883 XM_017009884 XP…	8
chr5	177497405	177517667	20263	*	4	4891	18280.4	TRUE	chr5	177511577	177516961	5385	-	177511791	177516945	51428	51428	DDX41	NM_001321732 NM_001321830 NM_016222 NP_001308661 NP_001308759 NP_057306 XM_024446109 XP_024301877	8
chr9	83699014	83714517	15504	*	4	3735	18271.8	TRUE	chr9	83659968	83707958	47991	-	83661787	83707679	29979	29979	UBQLN1	NM_013438 NM_053067 NP_038466 NP_444295 XM_005251948 XP_005252005	10
chr14	90382324	90400034	17711	*	4	3886	18236	TRUE	chr14	90396502	90408268	11767	+	90397231	90404717	801	801	CALM1	NM_001166106 NM_001363669 NM_001363670 NM_006888 NP_001350598 NP_001350599 NP_008819	8
chr17	40096108	40123815	27708	*	8	5021	18217.4	TRUE	chr17	40019097	40061215	42119	-	40019529	40056627	9862	9862	MED24	NM_001079518 NM_001267797 NM_001330211 NM_014815 NP_001072986 NP_001254726 NP_001317140 NP_055630 NR_052017	28
chr17	40096108	40123815	27708	*	8	5021	18217.4	TRUE	chr17	40121971	40136917	14947	+	40122613	40134369	339287	339287	MSL1	NM_001012241 NM_001365919 NM_001365920 NM_001365921 NP_001012241 NP_001352848 NP_001352849 NP_001352850	9
chr17	40096108	40123815	27708	*	8	5021	18217.4	TRUE	chr17	40140318	40172171	31854	+	40140549	40169621	22794	22794	CASC3	NM_007359 NP_031385 XM_005257163 XP_005257220 XR_001752451 XR_002957984 XR_002957985 XR_934422	12
chr17	40096108	40123815	27708	*	8	5021	18217.4	TRUE	chr17	40092793	40100589	7797	-	40093083	40100094	9572	9572	NR1D1	NM_021724 NP_068370	8
chr19	47226289	47241958	15670	*	5	3399	18201.1	TRUE	chr19	47274885	47275723	839	+	47274920	47275348	255783	255783	INAFM1	NM_178511 NP_848606 NR_037675	1
chr19	47226289	47241958	15670	*	5	3399	18201.1	TRUE	chr19	47256523	47273701	17179	+	47258401	47273460	26093	26093	CCDC9	NM_015603 NP_056418 XM_017026578 XP_016882067	15
chr19	47226289	47241958	15670	*	5	3399	18201.1	TRUE	chr19	47220824	47232766	11943	-	47221701	47232602	27113	27113	BBC3	NM_001127240 NM_001127241 NM_001127242 NM_014417 NP_001120712 NP_001120713 NP_001120714 NP_055232 XM_006723141 XM_011526722 XP_006723204 XP_011525024	5
chr1	161153544	161182553	29010	*	4	5072	18182.8	TRUE	chr1	161152776	161158856	6081	+	161153998	161158492	51506	51506	UFC1	NM_016406 NP_057490 XM_005245254 XM_017001450 XM_017001451 XP_005245311 XP_016856939 XP_016856940	6
chr1	161153544	161182553	29010	*	4	5072	18182.8	TRUE	chr1	161159450	161165723	6274	+	161160641	161165447	27005	27005	USP21	NM_001014443 NM_001319847 NM_001319848 NM_012475 NM_016572 NP_001014443 NP_001306776 NP_001306777 NP_036607 XM_017001036 XM_017001037 XM_017001038 XM_017001039 XM_017001040 XM_017001041 XM_024446413 XP_016856525 XP_016856526 XP_016856527 XP_016856528 XP_016856529 XP_016856530 XP_024302181 XR_002956279 XR_002956280	11
chr1	161153544	161182553	29010	*	4	5072	18182.8	TRUE	chr1	161100556	161118055	17500	-	161100683	161118026	5202	5202	PFDN2	NM_012394 NP_036526 XM_011509624 XP_011507926	4
chr1	161153544	161182553	29010	*	4	5072	18182.8	TRUE	chr1	161166056	161178013	11958	+	161166848	161177082	5498	5498	PPOX	NM_000309 NM_001122764 NM_001350128 NM_001350129 NM_001350130 NM_001350131 NM_001365398 NM_001365399 NM_001365400 NM_001365401 NP_000300 NP_001116236 NP_001337057 NP_001337058 NP_001337059 NP_001337060 NP_001352327 NP_001352328 NP_001352329 NP_001352330 XM_005245291 XM_005245295 XM_006711402 XM_006711403 XM_006711404 XM_006711406 XM_011509663 XM_011509664 XM_011509665 XM_011509666 XM_011509667 XM…	10
chr1	161153544	161182553	29010	*	4	5072	18182.8	TRUE	chr1	161120974	161132688	11715	-	161122147	161124462	9191	9191	DEDD	NM_001039711 NM_001039712 NM_001330765 NM_004216 NM_032998 NP_001034800 NP_001034801 NP_001317694 NP_127491 XM_005245598 XM_005245599 XM_005245600 XM_017002802 XP_005245655 XP_005245656 XP_005245657 XP_016858291	9
chr1	161153544	161182553	29010	*	4	5072	18182.8	TRUE	chr1	161197104	161214723	17620	+	161202386	161214193	4720	4720	NDUFS2	NM_001166159 NM_001377298 NM_001377299 NM_001377300 NM_001377301 NM_001377302 NM_004550 NP_001159631 NP_001364227 NP_001364228 NP_001364229 NP_001364230 NP_001364231 NP_004541 NR_165188 XM_005245209 XP_005245266	10
chr1	161153544	161182553	29010	*	4	5072	18182.8	TRUE	chr1	161215234	161220699	5466	+	161215322	161220530	2207	2207	FCER1G	NM_004106 NP_004097	6
chr1	161153544	161182553	29010	*	4	5072	18182.8	TRUE	chr1	161171310	161177968	6659	-	161171816	161176060	8703	8703	B4GALT3	NM_001199873 NM_001199874 NM_003779 NP_001186802 NP_001186803 NP_003770 XM_005245566 XM_011510093 XM_017002714 XM_024450540 XM_024450541 XP_005245623 XP_011508395 XP_016858203 XP_024306308 XP_024306309 XR_002957951 XR_002957952	6
chr1	161153544	161182553	29010	*	4	5072	18182.8	TRUE	chr1	161225939	161230746	4808	+	161226490	161229095	84134	84134	TOMM40L	NM_001286373 NM_001286374 NM_032174 NP_001273302 NP_001273303 NP_115550 XM_006711572 XM_011510057 XM_017002481 XM_017002482 XP_006711635 XP_011508359 XP_016857970 XP_016857971	8
chr7	158809550	158830386	20837	*	3	3469	18177.3	TRUE	chr7	158856558	158956747	100190	+	158856736	158945779	55112	55112	DYNC2I1	NM_001350914 NM_001350915 NM_001350916 NM_001350917 NM_001350918 NM_018051 NP_001337843 NP_001337844 NP_001337845 NP_001337846 NP_001337847 NP_060521 XM_005249549 XM_006716041 XM_011516367 XM_011516368 XM_011516369 XM_017012381 XM_017012382 XM_017012388 XP_005249606 XP_006716104 XP_011514669 XP_011514670 XP_011514671 XP_016867870 XP_016867871 XP_016867877 XR_001744823 XR_001744824 XR_001744825 XR…	27
chr7	158809550	158830386	20837	*	3	3469	18177.3	TRUE	chr7	158730995	158830253	99259	-	158734207	158829562	57488	57488	ESYT2	NM_001367773 NM_020728 NP_001354702 NP_065779 XM_024446846 XM_024446847 XM_024446848 XM_024446849 XP_024302614 XP_024302615 XP_024302616 XP_024302617 XR_002956471	25
chr17	7841984	7868306	26323	*	5	5505	18120.1	TRUE	chr17	7855066	7856099	1034	+	7855075	7855941	92162	92162	TMEM88	NM_001319941 NM_203411 NP_001306870 NP_981956 XM_005256856 XP_005256913	2
chr17	7841984	7868306	26323	*	5	5505	18120.1	TRUE	chr17	7857746	7862282	4537	+	7858135	7859612	124637	124637	CYB5D1	NM_001330110 NM_144607 NP_001317039 NP_653208	2
chr17	7841984	7868306	26323	*	5	5505	18120.1	TRUE	chr17	7884796	7912760	27965	+	7884807	7911704	1107	1107	CHD3	NM_001005271 NM_001005273 NM_001272 NM_005852 NP_001005271 NP_001005273 NP_005843 XM_005256427 XM_005256428 XM_005256429 XM_005256431 XM_006721423 XM_006721424 XM_006721428 XM_017024061 XM_017024062 XM_017024063 XM_017024064 XM_017024065 XM_017024066 XM_017024067 XM_017024068 XM_017024069 XM_017024070 XP_005256484 XP_005256485 XP_005256486 XP_005256488 XP_006721486 XP_006721487 XP_006721491 XP_01…	42
chr8	37880556	37904096	23541	*	4	5336	18109.3	TRUE	chr8	37843268	37849861	6594	-	37844490	37849783	55290	55290	BRF2	NM_018310 NP_060780	6
chr8	37880556	37904096	23541	*	4	5336	18109.3	TRUE	chr8	37858618	37899497	40880	-	37862895	37899441	80223	80223	RAB11FIP1	NM_001002233 NM_001002814 NM_025151 NP_001002814 NP_079427 XM_017013869 XP_016869358	5
chr5	100509213	100537013	27801	*	5	3866	18036.6	TRUE	chr5	100535374	100586741	51368	+	100535531	100586184	345757	345757	FAM174A	NM_198507 NP_940909 XM_006714600 XP_006714663	4
chr16	29804722	29821758	17037	*	4	4885	18030.9	TRUE	chr16	29811547	29820092	8546	+	29813055	29816584	112476	112476	PRRT2	NM_001256442 NM_001256443 NM_145239 NP_001243371 NP_001243372 NP_660282 XM_011545715 XM_017022887 XM_017022888 XM_017022889 XP_011544017 XP_016878376 XP_016878377 XP_016878378	8
chr16	29804722	29821758	17037	*	4	4885	18030.9	TRUE	chr16	29806106	29812227	6122	+	29806145	29811153	4150	4150	MAZ	NM_001042539 NM_001276275 NM_001276276 NM_002383 NP_001036004 NP_001263204 NP_001263205 NP_002374 NR_074080 XM_006721047 XP_006721110 XR_002957805 XR_002957806	9
chr16	29804722	29821758	17037	*	4	4885	18030.9	TRUE	chr16	29816152	29830627	14476	+	29816526	29819754	79447	79447	PAGR1	NM_024516 NP_078792	4
chr16	29804722	29821758	17037	*	4	4885	18030.9	TRUE	chr16	29820394	29848039	27646	+	29830550	29847989	9961	9961	MVP	NM_001293204 NM_001293205 NM_005115 NM_017458 NP_001280133 NP_001280134 NP_005106 NP_059447	20
chr17	76261721	76277553	15833	*	5	3683	18016.8	TRUE	chr17	76265348	76271298	5951	+	76265506	76270505	283991	283991	UBALD2	NM_182565 NP_872371	3
chr17	76261721	76277553	15833	*	5	3683	18016.8	TRUE	chr17	76142465	76240493	98029	-	76145235	76240240	114804	114804	RNF157	NM_001330501 NM_052916 NP_001317430 NP_443148 XM_005257007 XM_011524273 XM_017024117 XM_017024120 XP_005257064 XP_011522575 XP_016879606 XP_016879609 XR_001752422	20
chr11	73973972	73995490	21519	*	4	3187	18004.1	TRUE	chr11	73974672	73982843	8172	-	73975007	73978378	7351	7351	UCP2	NM_001381943 NM_001381944 NM_001381945 NM_001381947 NM_001381948 NM_001381949 NM_001381950 NM_003355 NP_001368872 NP_001368873 NP_001368874 NP_001368876 NP_001368877 NP_001368878 NP_001368879 NP_003346 XM_024448674 XP_024304442	11
chr11	129992310	130003946	11637	*	2	2571	17985.8	TRUE	chr11	129899706	130002835	103130	-	129902313	129960964	56980	56980	PRDM10	NM_001367890 NM_001367891 NM_001367892 NM_001367893 NM_001367894 NM_001367895 NM_001367896 NM_001367897 NM_001367898 NM_001367899 NM_020228 NM_199437 NM_199438 NM_199439 NP_001354819 NP_001354820 NP_001354821 NP_001354822 NP_001354823 NP_001354824 NP_001354825 NP_001354826 NP_001354827 NP_001354828 NP_064613 NP_955469 NP_955470 NP_955471 XM_011542912 XM_017018023 XP_011541214 XP_016873512	23
chr2	20185768	20243315	57548	*	8	4612	17977.5	TRUE	chr2	20200797	20225433	24637	-	20202270	20224867	6382	6382	SDC1	NM_001006946 NM_002997 NP_001006947 NP_002988 XM_005262620 XM_005262621 XM_005262622 XP_005262677 XP_005262678 XP_005262679	8
chrX	153925617	153986426	60810	*	7	6567	17975.6	TRUE	chrX	153861514	153909223	47710	-	153862663	153909166	3897	3897	L1CAM	NM_000425 NM_001143963 NM_001278116 NM_024003 NP_000416 NP_001137435 NP_001265045 NP_076493	31
chrX	153925617	153986426	60810	*	7	6567	17975.6	TRUE	chrX	153972754	153983194	10441	+	153982063	153982848	8269	8269	TMEM187	NM_003492 NP_003483 XM_011531199 XP_011529501	3
chrX	153925617	153986426	60810	*	7	6567	17975.6	TRUE	chrX	153907367	153934999	27633	-	153907729	153926202	393	393	ARHGAP4	NM_001164741 NM_001666 NP_001158213 NP_001657	30
chrX	153925617	153986426	60810	*	7	6567	17975.6	TRUE	chrX	153929225	153935080	5856	-	153929987	153934904	8260	8260	NAA10	NM_001256119 NM_001256120 NM_003491 NP_001243048 NP_001243049 NP_003482	6
chrX	153925617	153986426	60810	*	7	6567	17975.6	TRUE	chrX	153935269	153944687	9419	-	153935286	153944610	5973	5973	RENBP	NM_002910 NP_002901 XM_017029698 XP_016885187	13
chrX	153925617	153986426	60810	*	7	6567	17975.6	TRUE	chrX	153947557	153971818	24262	-	153949347	153970840	3054	3054	HCFC1	NM_005334 NP_005325 XM_006724815 XM_006724816 XM_011531147 XM_011531148 XM_017029471 XM_017029472 XP_006724878 XP_006724879 XP_011529449 XP_011529450 XP_016884960 XP_016884961	26
chr9	131372993	131403339	30347	*	6	4679	17949.7	TRUE	chr9	131373636	131500197	126562	+	131430145	131495874	84726	84726	PRRC2B	NM_001384818 NM_001384821 NM_001384822 NM_001384823 NM_013318 NM_032640 NP_001371747 NP_001371750 NP_001371751 NP_001371752 NP_037450	33
chr4	37956517	37995914	39398	*	8	4311	17887.7	TRUE	chr4	37960398	37961128	731	+	37960435	37961010	10744	10744	PTTG2	NM_006607 NP_006598	1
chrX	107701687	107777344	75658	*	9	5841	17886	TRUE	chrX	107774899	107795829	20931	+	107794221	107794682	392517	392517	NCBP2L	NM_001348372 NP_001335301	3
chrX	107701687	107777344	75658	*	9	5841	17886	TRUE	chrX	107713221	107777342	64122	-	107714519	107775419	1831	1831	TSC22D3	NM_001015881 NM_001318468 NM_001318470 NM_004089 NM_198057 NP_001015881 NP_001305397 NP_001305399 NP_004080 NP_932174 XM_005262099 XM_005262100 XM_005262102 XM_005262103 XM_011530884 XM_017029335 XP_005262156 XP_005262157 XP_005262159 XP_005262160 XP_011529186 XP_016884824	10
chrX	107701687	107777344	75658	*	9	5841	17886	TRUE	chrX	107825755	107931637	105883	+	107826427	107927073	11043	11043	MID2	NM_001382751 NM_001382752 NM_012216 NM_052817 NP_001369680 NP_001369681 NP_036348 NP_438112	11
chr2	46967421	46985969	18549	*	5	4236	17876.6	TRUE	chr2	46901870	46941855	39986	-	46905463	46941663	90411	90411	MCFD2	NM_001171506 NM_001171507 NM_001171508 NM_001171509 NM_001171510 NM_001171511 NM_139279 NP_001164977 NP_001164978 NP_001164979 NP_001164980 NP_001164981 NP_001164982 NP_644808	10
chr17	17799240	17860456	61217	*	8	5468	17875.1	TRUE	chr17	17810399	17837002	26604	-	17811755	17836817	6720	6720	SREBF1	NM_001005291 NM_001321096 NM_001388385 NM_001388386 NM_001388387 NM_001388388 NM_001388389 NM_001388390 NM_001388391 NM_001388392 NM_001388393 NM_001388394 NM_004176 NP_001005291 NP_001308025 NP_001375314 NP_001375315 NP_001375316 NP_001375317 NP_001375318 NP_001375319 NP_001375320 NP_001375321 NP_001375322 NP_001375323 NP_004167 NR_170943 NR_170944 NR_170945 NR_170990 XM_017024970 XM_017024971 X…	16
chr6	44245898	44264503	18606	*	3	5780	17838.5	TRUE	chr6	44246166	44253888	7723	+	44248630	44253598	3326	3326	HSP90AB1	NM_001271969 NM_001271970 NM_001271971 NM_001271972 NM_001371238 NM_007355 NP_001258898 NP_001258899 NP_001258900 NP_001258901 NP_001358167 NP_031381 NR_073528	14
chr6	44245898	44264503	18606	*	3	5780	17838.5	TRUE	chr6	44270450	44307506	37057	+	44270743	44307035	441151	441151	TMEM151B	NM_001039704 NM_001137560 NP_001131032	4
chr6	44245898	44264503	18606	*	3	5780	17838.5	TRUE	chr6	44273194	44380179	106986	+	44273194	44377063	221409	221409	SPATS1	NM_001372081 NM_145026 NP_001359010 NP_659463	12
chr6	44245898	44264503	18606	*	3	5780	17838.5	TRUE	chr6	44254096	44257890	3795	-	44254706	44257410	347734	347734	SLC35B2	NM_001286509 NM_001286510 NM_001286511 NM_001286512 NM_001286513 NM_001286517 NM_001286519 NM_001286520 NM_178148 NP_001273438 NP_001273439 NP_001273440 NP_001273441 NP_001273442 NP_001273446 NP_001273448 NP_001273449 NP_835361	6
chr6	44245898	44264503	18606	*	3	5780	17838.5	TRUE	chr6	44258166	44265788	7623	-	44259219	44265763	4794	4794	NFKBIE	NM_004556 NP_004547	6
chr11	102288184	102348296	60113	*	6	4925	17812	FALSE	chr11	102317450	102339403	21954	+	102324510	102337102	330	330	BIRC3	NM_001165 NM_182962 NP_001156 NP_892007 XM_024448467 XP_024304235	12
chr11	102288184	102348296	60113	*	6	4925	17812	FALSE	chr11	102347211	102378670	31460	+	102348703	102378183	329	329	BIRC2	NM_001166 NM_001256163 NM_001256166 NP_001157 NP_001243092 NP_001243095	10
chr6	52535910	52577648	41739	*	5	5042	17786.2	FALSE	chr6	52497408	52577060	79653	-	52503197	52576915	9697	9697	TRAM2	NM_012288 NP_036420 XM_011515005 XP_011513307	11
chr10	80186729	80219338	32610	*	3	4550	17780.3	FALSE	chr10	80150889	80205572	54684	-	80155853	80172861	311	311	ANXA11	NM_001157 NM_001278407 NM_001278408 NM_001278409 NM_145868 NM_145869 NP_001148 NP_001265336 NP_001265337 NP_001265338 NP_665875 NP_665876 XM_005269741 XM_005269742 XM_006717813 XM_011539736 XP_005269798 XP_005269799 XP_006717876 XP_011538038	21
chr20	37336120	37366893	30774	*	5	4201	17777.6	FALSE	chr20	37344685	37406050	61366	+	37384154	37403379	6714	6714	SRC	NM_005417 NM_198291 NP_005408 NP_938033 XM_011529013 XM_017028024 XM_017028025 XM_017028026 XM_017028027 XP_011527315 XP_016883513 XP_016883514 XP_016883515 XP_016883516	21
chr16	1308972	1379625	70654	*	8	6008	17726.8	FALSE	chr16	1349240	1351878	2639	-	1349437	1351804	115939	115939	TSR3	NM_001001410 NP_001001410	6
chr16	1308972	1379625	70654	*	8	6008	17726.8	FALSE	chr16	1308880	1327018	18139	+	1314031	1324793	7329	7329	UBE2I	NM_003345 NM_194259 NM_194260 NM_194261 NP_003336 NP_919235 NP_919236 NP_919237 XM_005255540 XM_005255541 XM_011522644 XM_011522645 XM_017023640 XM_024450432 XP_005255597 XP_005255598 XP_011520946 XP_011520947 XP_016879129 XP_024306200	10
chr16	1308972	1379625	70654	*	8	6008	17726.8	FALSE	chr16	1351931	1365737	13807	+	1351966	1363091	84572	84572	GNPTG	NM_032520 NP_115909 XM_017023782 XM_017023783 XP_016879271 XP_016879272	8
chr16	1308972	1379625	70654	*	8	6008	17726.8	FALSE	chr16	1333638	1349441	15804	+	1334662	1349392	8938	8938	BAIAP3	NM_001199096 NM_001199097 NM_001199098 NM_001199099 NM_001286464 NM_003933 NP_001186025 NP_001186026 NP_001186027 NP_001186028 NP_001273393 NP_003924 XM_011522728 XM_011522729 XM_011522730 XP_011521030 XP_011521031 XP_011521032	34
chr14	39431221	39449213	17993	*	4	3620	17713.1	FALSE	chr14	39397684	39432433	34750	-	39399516	39432162	254170	254170	FBXO33	NM_203301 NP_976046	4
chr3	150761961	150766405	4445	*	2	2477	17711.6	FALSE	chr3	150741125	150763431	22307	-	150742141	150762849	6478	6478	SIAH2	NM_005067 NP_005058	3
chr7	87216379	87220719	4341	*	2	2833	17710.2	FALSE	chr7	87196160	87220587	24428	-	87196636	87219503	79161	79161	TMEM243	NM_001329472 NM_001329473 NM_001329474 NM_001329475 NM_024315 NP_001316401 NP_001316402 NP_001316403 NP_001316404 NP_077291 NR_138030 XM_005250586 XM_005250587 XM_005250588 XM_017012616 XP_005250643 XP_005250644 XP_005250645 XP_016868105	7
chr3	108202017	108223456	21440	*	3	3214	17708.6	FALSE	chr3	108160812	108222435	61624	-	108162477	108222322	55081	55081	IFT57	NM_018010 NP_060480	11
chr9	131719097	131739913	20817	*	4	3828	17666.5	FALSE	chr9	131576770	131740076	163307	-	131579497	131739830	2889	2889	RAPGEF1	NM_001304275 NM_001377935 NM_001377936 NM_001377937 NM_001377938 NM_005312 NM_198679 NP_001291204 NP_001364864 NP_001364865 NP_001364866 NP_001364867 NP_005303 NP_941372 XM_005272186 XM_006717067 XM_006717072 XM_006717074 XM_011518569 XM_011518570 XM_011518571 XM_011518572 XM_011518573 XM_011518574 XM_011518575 XM_011518576 XM_011518577 XM_011518578 XM_011518579 XM_011518580 XM_011518581 XM_01151…	29
chr15	96309430	96341641	32212	*	7	4526	17635.5	FALSE	chr15	96325938	96340263	14326	+	96326310	96337622	7026	7026	NR2F2	NM_001145155 NM_001145156 NM_001145157 NM_021005 NP_001138627 NP_001138628 NP_001138629 NP_066285	5
chr22	38294898	38318494	23597	*	5	3898	17633.3	FALSE	chr22	38219291	38273010	53720	-	38221469	38247961	25829	25829	TMEM184B	NM_001195071 NM_001195072 NM_012264 NP_001182000 NP_001182001 NP_036396 XM_011530112 XM_011530113 XM_011530114 XM_011530115 XM_011530117 XM_011530118 XM_011530119 XM_017028754 XM_017028755 XM_017028756 XM_017028757 XM_017028759 XM_024452210 XM_024452211 XP_011528414 XP_011528415 XP_011528416 XP_011528417 XP_011528419 XP_011528420 XP_011528421 XP_016884243 XP_016884244 XP_016884245 XP_016884246 XP…	13
chr22	38294898	38318494	23597	*	5	3898	17633.3	FALSE	chr22	38290691	38318084	27394	-	38293287	38314157	1454	1454	CSNK1E	NM_001894 NM_152221 NP_001885 NP_689407	14
chr7	102273540	102337678	64139	*	9	6177	17576.9	FALSE	chr7	102285091	102321711	36621	+	102285159	102321630	10603	10603	SH2B2	NM_001359228 NM_001359229 NM_001359230 NM_001359231 NM_001393990 NM_001393991 NM_001393992 NM_001393993 NM_001393994 NM_001393995 NM_001394426 NM_020979 NP_001346157 NP_001346158 NP_001346159 NP_001346160 NP_001380919 NP_001380920 NP_001380921 NP_001380922 NP_001380923 NP_001380924 NP_001381355 NP_066189	10
chr7	102273540	102337678	64139	*	9	6177	17576.9	FALSE	chr7	102363872	102426676	62805	+	102396412	102425111	100630923	100630923	LOC100630923	NR_038967	10
chr20	50504967	50528227	23261	*	5	3966	17517.1	FALSE	chr20	50510321	50585241	74921	+	50510528	50582715	5770	5770	PTPN1	NM_001278618 NM_002827 NP_001265547 NP_002818	10
chr17	82418019	82466065	48047	*	6	6151	17499.8	FALSE	chr17	82418318	82442645	24328	+	82419800	82442592	284004	284004	HEXD	NM_001330542 NM_001369487 NM_001369488 NM_173620 NP_001317471 NP_001356416 NP_001356417 NP_775891 XM_005256346 XM_006722280 XM_011523560 XM_011523561 XM_017024484 XM_024450705 XP_005256403 XP_006722343 XP_011521862 XP_011521863 XP_016879973 XP_024306473 XR_001752496 XR_430030 XR_430031	13
chr17	82418019	82466065	48047	*	6	6151	17499.8	FALSE	chr17	82458180	82490537	32358	+	82458804	82488157	26502	26502	NARF	NM_001038618 NM_001083608 NM_012336 NM_031968 NP_001033707 NP_001077077 NP_036468 NP_114174 XM_005256340 XM_006722278 XM_011523541 XM_011523543 XM_011523544 XM_017024449 XM_017024450 XP_005256397 XP_006722341 XP_011521843 XP_011521845 XP_011521846 XP_016879938 XP_016879939	17
chr17	82418019	82466065	48047	*	6	6151	17499.8	FALSE	chr17	82389210	82418637	29428	-	82392398	82418485	79701	79701	OGFOD3	NM_024648 NM_175902 NP_078924 NP_787098 NR_033265 XR_001752626 XR_002958069 XR_430034 XR_933942	12
chr17	82418019	82466065	48047	*	6	6151	17499.8	FALSE	chr17	82442586	82450829	8244	-	82443451	82449254	79415	79415	CYBC1	NM_001033046 NM_001100407 NM_001100408 NM_001193653 NM_001193654 NM_001193655 NM_001193657 NM_024510 NP_001028218 NP_001093877 NP_001093878 NP_001180582 NP_001180583 NP_001180584 NP_001180586 NR_036514 NR_036516 NR_036517 NR_036518 NR_036519 XM_006722293 XM_011523606 XM_017025073 XM_017025074 XM_017025076 XM_017025077 XM_017025078 XP_006722356 XP_011521908 XP_016880562 XP_016880563 XP_016880565 X…	5
chr9	137070430	137096813	26384	*	4	4650	17478.7	FALSE	chr9	137007234	137028915	21682	-	137007929	137028872	20	20	ABCA2	NM_001606 NM_212533 NP_001597 NP_997698 XM_006716996 XP_006717059 XR_001746224	41
chr9	137070430	137096813	26384	*	4	4650	17478.7	FALSE	chr9	137077517	137084539	7023	+	137077533	137082729	91373	91373	UAP1L1	NM_207309 NP_997192 XM_006717317 XM_011519182 XP_006717380 XP_011517484	5
chr9	137070430	137096813	26384	*	4	4650	17478.7	FALSE	chr9	137030174	137040436	10263	-	137030710	137040436	2529	2529	FUT7	NM_004479 NP_004470	5
chr9	137070430	137096813	26384	*	4	4650	17478.7	FALSE	chr9	137086857	137109189	22333	+	137087000	137109025	11253	11253	MAN1B1	NM_016219 NP_057303 NR_045720 NR_045721 XM_006716945 XM_017014239 XM_024447403 XP_006717008 XP_016869728 XP_024303171 XR_001746176	8
chr9	137070430	137096813	26384	*	4	4650	17478.7	FALSE	chr9	137039463	137046179	6717	-	137039772	137045989	56654	56654	NPDC1	NM_015392 NP_056207	8
chr9	137070430	137096813	26384	*	4	4650	17478.7	FALSE	chr9	137048107	137054061	5955	-	137048657	137053997	954	954	ENTPD2	NM_001246 NM_203468 NP_001237 NP_982293 XM_011519212 XP_011517514	9
chr9	137070430	137096813	26384	*	4	4650	17478.7	FALSE	chr9	137062127	137070557	8431	-	137064659	137070460	89958	89958	SAPCD2	NM_178448 NP_848543 XM_011519180 XP_011517482	6
chr9	137070430	137096813	26384	*	4	4650	17478.7	FALSE	chr9	137139154	137168756	29603	+	137139487	137167842	2902	2902	GRIN1	NM_000832 NM_001185090 NM_001185091 NM_007327 NM_021569 NP_000823 NP_001172019 NP_001172020 NP_015566 NP_067544 XM_005266071 XM_005266072 XM_005266073 XM_011518583 XP_005266128 XP_005266129 XP_005266130 XP_011516885	19
chr19	55252946	55259653	6708	*	3	2720	17461.7	FALSE	chr19	55229779	55259017	29239	-	55230528	55247103	22870	22870	PPP6R1	NM_014931 NP_055746	25
chr19	55252946	55259653	6708	*	3	2720	17461.7	FALSE	chr19	55226638	55228773	2136	-	55227181	55228741	255043	255043	TMEM86B	NM_001372013 NM_173804 NP_001358942 NP_776165	2
chr19	55252946	55259653	6708	*	3	2720	17461.7	FALSE	chr19	55181247	55209506	28260	-	55181754	55209433	5794	5794	PTPRH	NM_001161440 NM_002842 NP_001154912 NP_002833 XM_011527183 XM_011527188 XM_011527190 XM_017027056 XM_017027057 XM_017027058 XM_017027059 XM_017027060 XM_017027061 XM_017027062 XM_017027063 XM_017027064 XP_011525485 XP_011525490 XP_011525492 XP_016882545 XP_016882546 XP_016882547 XP_016882548 XP_016882549 XP_016882550 XP_016882551 XP_016882552 XP_016882553 XR_001753730 XR_001753731	21
chr19	55252946	55259653	6708	*	3	2720	17461.7	FALSE	chr19	55282072	55312562	30491	+	55282199	55312068	84446	84446	BRSK1	NM_032430 NP_115806 XM_005259327 XM_011527395 XM_024451739 XP_005259384 XP_011525697 XP_024307507 XR_430213	22
chr9	70412640	70421081	8442	*	2	4491	17429	FALSE	chr9	70384604	70414657	30054	-	70387776	70413363	687	687	KLF9	NM_001206 NP_001197	2
chr8	141116409	141129339	12931	*	5	4471	17423.7	FALSE	chr8	141117278	141195808	78531	+	141128708	141194233	22898	22898	DENND3	NM_001352890 NM_001352891 NM_001362798 NM_014957 NP_001339819 NP_001339820 NP_001349727 NP_055772 NR_148197 XM_005250840 XM_005250841 XM_005250842 XM_011516933 XM_011516934 XM_011516937 XM_011516938 XM_011516939 XM_011516940 XM_011516941 XM_017013241 XM_017013242 XM_017013243 XP_005250897 XP_005250898 XP_005250899 XP_011515235 XP_011515236 XP_011515239 XP_011515240 XP_011515241 XP_011515242 XP_01…	25
chr14	65318602	65371230	52629	*	10	5709	17414.6	FALSE	chr14	65410592	65744121	333530	+	65561564	65742410	2530	2530	FUT8	NM_001371533 NM_001371534 NM_001371536 NM_004480 NM_178154 NM_178155 NM_178156 NM_178157 NP_001358462 NP_001358463 NP_001358465 NP_004471 NP_835368 NP_835369 NR_038167 XM_011536614 XM_017021136 XM_017021138 XM_017021139 XM_017021140 XP_011534916 XP_016876625 XP_016876627 XP_016876628 XP_016876629	21
chr11	6603199	6619642	16444	*	3	3529	17390.1	FALSE	chr11	6603708	6610874	7167	+	6604272	6610611	3611	3611	ILK	NM_001014794 NM_001014795 NM_001278441 NM_001278442 NM_004517 NP_001014794 NP_001014795 NP_001265370 NP_001265371 NP_004508 XM_005252904 XM_005252905 XM_011520065 XM_017017672 XM_024448494 XM_024448495 XM_024448496 XM_024448497 XM_024448498 XM_024448499 XM_024448500 XP_005252961 XP_005252962 XP_011518367 XP_016873161 XP_024304262 XP_024304263 XP_024304264 XP_024304265 XP_024304266 XP_024304267 XP…	10
chr11	6603199	6619642	16444	*	3	3529	17390.1	FALSE	chr11	6595072	6603616	8545	-	6600146	6603502	23378	23378	RRP8	NM_015324 NP_056139 XM_011519955 XM_017017423 XP_011518257 XP_016872912 XR_930858 XR_930859	5
chr11	6603199	6619642	16444	*	3	3529	17390.1	FALSE	chr11	6606294	6612539	6246	-	6610922	6612189	6881	6881	TAF10	NM_006284 NP_006275	5
chr11	6603199	6619642	16444	*	3	3529	17390.1	FALSE	chr11	6610883	6619448	8566	-	6614546	6619427	1200	1200	TPP1	NM_000391 NP_000382	6
chr3	31917092	31981940	64849	*	12	8061	17379.3	FALSE	chr3	31981750	31991723	9974	+	31989080	31990978	344787	344787	ZNF860	NM_001137674 NP_001131146 XM_017006299 XP_016861788 XR_001740138	3
chr9	121343873	121370721	26849	*	7	5029	17368	FALSE	chr9	121338987	121370304	31318	-	121339621	121370187	2040	2040	STOM	NM_001270526 NM_001270527 NM_004099 NM_198194 NP_001257455 NP_001257456 NP_004090 NP_937837 NR_073037	7
chr17	7012315	7047417	35103	*	6	5868	17357.9	FALSE	chr17	7012417	7017525	5109	+	7012567	7017321	100529209	100529209	RNASEK-C17orf49	NR_037717	4
chr17	7012315	7047417	35103	*	6	5868	17357.9	FALSE	chr17	7012461	7014532	2072	+	7012567	7014286	440400	440400	RNASEK	NM_001004333 NP_001004333 NR_037715 NR_037716	2
chr17	7012315	7047417	35103	*	6	5868	17357.9	FALSE	chr17	7014782	7017520	2739	+	7014858	7017321	124944	124944	C17orf49	NM_001142798 NM_001142799 NM_174893 NP_001136270 NP_001136271 NP_777553	7
chr17	7012315	7047417	35103	*	6	5868	17357.9	FALSE	chr17	7023050	7030290	7241	+	7023672	7029833	255877	255877	BCL6B	NM_181844 NP_862827	10
chr17	7012315	7047417	35103	*	6	5868	17357.9	FALSE	chr17	7036015	7040117	4103	+	7036383	7039962	201232	201232	SLC16A13	NM_201566 NP_963860	4
chr17	7012315	7047417	35103	*	6	5868	17357.9	FALSE	chr17	7041621	7044092	2472	-	7041679	7043513	162515	162515	SLC16A11	NM_001370549 NM_001370553 NM_153357 NP_001357478 NP_001357482 NP_699188 XM_017024282 XP_016879771	2
chr3	52216823	52262850	46028	*	7	5703	17355.5	FALSE	chr3	52245759	52250599	4841	+	52245825	52249814	132160	132160	PPM1M	NM_001122870 NM_144641 NP_001116342 NP_653242 XM_005264879 XM_005264880 XM_005264881 XP_005264936 XP_005264937 XP_005264938 XR_001740024	8
chr3	52216823	52262850	46028	*	7	5703	17355.5	FALSE	chr3	52221080	52231190	10111	-	52221217	52231190	54106	54106	TLR9	NM_017442 NM_138688 NP_059138	6
chr3	52216823	52262850	46028	*	7	5703	17355.5	FALSE	chr3	52287089	52295257	8169	+	52287094	52293134	132158	132158	GLYCTK	NM_001144951 NM_145262 NP_001138423 NP_660305 NR_026699 NR_026700 NR_026701 NR_026702 XM_017005730 XM_024453351 XM_024453352 XP_016861219 XP_024309119 XP_024309120 XR_001740022 XR_001740023 XR_245095	5
chr3	52216823	52262850	46028	*	7	5703	17355.5	FALSE	chr3	52228612	52246788	18177	-	52229034	52239016	11344	11344	TWF2	NM_007284 NP_009215	6
chr20	63940423	63981378	40956	*	8	5836	17331.4	FALSE	chr20	63981132	64033100	51969	+	63981246	64032993	24148	24148	PRPF6	NM_012469 NP_036601 XM_006723769 XP_006723832	21
chr20	63940423	63981378	40956	*	8	5836	17331.4	FALSE	chr20	63939829	63956416	16588	-	63939976	63956372	54963	54963	UCKL1	NM_001193379 NM_001353475 NM_001353476 NM_001353477 NM_001353478 NM_001353479 NM_001353480 NM_001353481 NM_001353482 NM_017859 NP_001180308 NP_001340404 NP_001340405 NP_001340406 NP_001340407 NP_001340408 NP_001340409 NP_001340410 NP_001340411 NP_060329 NR_126526 NR_148434 NR_148435 NR_148436 NR_148437 NR_148438 NR_148439 NR_148440 NR_148441 NR_148442 XM_005260216 XM_006723806 XM_006723807 XM_006…	16
chr20	63940423	63981378	40956	*	8	5836	17331.4	FALSE	chr20	63956704	63969930	13227	-	63959888	63967950	57473	57473	ZNF512B	NM_020713 NP_065764 XM_011528930 XM_011528933 XM_024451950 XM_024451951 XM_024451952 XM_024451953 XM_024451954 XM_024451955 XP_011527232 XP_011527235 XP_024307718 XP_024307719 XP_024307720 XP_024307721 XP_024307722 XP_024307723	17
chr20	63940423	63981378	40956	*	8	5836	17331.4	FALSE	chr20	63974116	63980008	5893	-	63975510	63979467	140700	140700	SAMD10	NM_080621 NP_542188 XM_005260199 XM_006723705 XM_011528565 XM_017027671 XP_005260256 XP_006723768 XP_011526867 XP_016883160	7
chr1	26110714	26120602	9889	*	4	3611	17317.8	FALSE	chr1	26111165	26125555	14391	+	26114309	26122577	149420	149420	PDIK1L	NM_001243532 NM_001243533 NM_152835 NP_001230461 NP_001230462 NP_690048	5
chr1	26110714	26120602	9889	*	4	3611	17317.8	FALSE	chr1	26051301	26068436	17136	-	26051873	26067494	84676	84676	TRIM63	NM_032588 NP_115977	9
chr1	26110714	26120602	9889	*	4	3611	17317.8	FALSE	chr1	26159079	26163962	4884	+	26161292	26162107	79927	79927	FAM110D	NM_024869 NP_079145	2
chr1	26110714	26120602	9889	*	4	3611	17317.8	FALSE	chr1	26169908	26170873	966	+	26169984	26170716	51042	51042	ZNF593	NM_015871 NP_056955	2
chr5	57172984	57176766	3783	*	2	2440	17205.5	FALSE	chr5	57173948	57264679	90732	+	57214131	57262752	65056	65056	GPBP1	NM_001127235 NM_001127236 NM_001203246 NM_001331037 NM_022913 NP_001120707 NP_001120708 NP_001190175 NP_001317966 NP_075064	14
chr22	46563375	46621768	58394	*	9	6978	17161.7	FALSE	chr22	46576012	46679790	103779	+	46626800	46677251	23151	23151	GRAMD4	NM_001366660 NM_015124 NP_001353589 NP_055939 XM_005261396 XM_006724169 XM_006724170 XM_011530011 XM_011530012 XM_011530014 XM_017028670 XP_005261453 XP_006724232 XP_006724233 XP_011528313 XP_011528314 XP_011528316 XP_016884159	22
chr22	46563375	46621768	58394	*	9	6978	17161.7	FALSE	chr22	46360834	46537620	176787	-	46363178	46537170	9620	9620	CELSR1	NM_001378328 NM_014246 NP_001365257 NP_055061 XM_011530553 XM_011530554 XM_011530555 XP_011528855 XP_011528856 XP_011528857	37
chr17	43266544	43316571	50028	*	8	9251	17159.3	FALSE	chr17	43216941	43305397	88457	-	43221571	43303256	100874261	100874261	CCDC200	NM_001363254 NP_001350183 NR_047479	11
chr15	52503818	52565704	61887	*	9	4961	17142.4	FALSE	chr15	52307281	52529132	221852	-	52313696	52528806	4644	4644	MYO5A	NM_000259 NM_001142495 NM_001382347 NM_001382348 NM_001382349 NP_000250 NP_001135967 NP_001369276 NP_001369277 NP_001369278 XM_011521607 XM_011521609 XM_011521610 XM_011521611 XM_011521612 XM_017022227 XP_011519909 XP_011519911 XP_011519912 XP_011519913 XP_011519914 XP_016877716	39
chr15	52503818	52565704	61887	*	9	4961	17142.4	FALSE	chr15	52547045	52569883	22839	-	52551934	52568892	10776	10776	ARPP19	NM_001306191 NM_001306195 NM_001306196 NM_001330309 NM_006628 NP_001293120 NP_001293124 NP_001293125 NP_001317238 NP_006619 XM_017021870 XP_016877359	8
chr11	74929710	74954475	24766	*	4	3032	17139.9	FALSE	chr11	74949261	74979033	29773	+	74949286	74977043	9789	9789	SPCS2	NM_014752 NP_055567	7
chr11	74929710	74954475	24766	*	4	3032	17139.9	FALSE	chr11	74988279	75018893	30615	+	74989061	75006492	10825	10825	NEU3	NM_001367860 NM_001367861 NM_001367862 NM_001367863 NM_001367864 NM_001367865 NM_001367866 NM_001367867 NM_006656 NP_001354789 NP_001354790 NP_001354791 NP_001354792 NP_001354793 NP_001354794 NP_001354795 NP_001354796 NP_006647	7
chr11	74929710	74954475	24766	*	4	3032	17139.9	FALSE	chr11	74807739	74949200	141462	-	74843200	74940878	143570	143570	XRRA1	NM_001270380 NM_001270381 NM_001378157 NM_001378158 NM_001378159 NM_001378160 NM_001378161 NM_001378162 NM_001378163 NM_001378164 NM_001378165 NM_001378166 NM_001378167 NM_001378168 NM_001378169 NM_001378170 NM_001378171 NM_001378172 NM_001378173 NM_001378174 NM_001378175 NM_001378176 NM_182969 NP_001257309 NP_001257310 NP_001365086 NP_001365087 NP_001365088 NP_001365089 NP_001365090 NP_001365091…	20
chr11	14891048	14907957	16910	*	3	3680	17118.7	FALSE	chr11	14904997	15082342	177346	+	14978336	15077445	797	797	CALCB	NM_000728 NP_000719	12
chr11	14891048	14907957	16910	*	3	3680	17118.7	FALSE	chr11	14877440	14892231	14792	-	14878122	14892205	120227	120227	CYP2R1	NM_001377214 NM_001377215 NM_001377216 NM_001377217 NM_001377227 NM_001400558 NM_001400559 NM_001400560 NM_001400561 NM_001400562 NM_001400563 NM_001400564 NM_001400565 NM_001400566 NM_001400567 NM_001400568 NM_024514 NP_001364143 NP_001364144 NP_001364145 NP_001364146 NP_001364156 NP_001387487 NP_001387488 NP_001387489 NP_001387490 NP_001387491 NP_001387492 NP_001387493 NP_001387494 NP_001387495…	7
chr3	69079761	69105000	25240	*	6	3280	17104.5	FALSE	chr3	69084937	69106092	21156	+	69085048	69104909	10550	10550	ARL6IP5	NM_006407 NP_006398	5
chr3	69079761	69105000	25240	*	6	3280	17104.5	FALSE	chr3	69019827	69052339	32513	-	69023177	69052086	7110	7110	TMF1	NM_001363879 NM_007114 NP_001350808 NP_009045	18
chr3	69079761	69105000	25240	*	6	3280	17104.5	FALSE	chr3	69054730	69080408	25679	-	69055437	69080353	9039	9039	UBA3	NM_001363861 NM_003968 NM_198195 NM_198197 NP_001350790 NP_003959 NP_937838 XM_011534210 XP_011532512	18
chr1	154380068	154445576	65509	*	10	4684	17091.7	FALSE	chr1	154405193	154469450	64258	+	154405630	154465380	3570	3570	IL6R	NM_000565 NM_001206866 NM_001382769 NM_001382770 NM_001382771 NM_001382772 NM_001382773 NM_001382774 NM_181359 NP_000556 NP_001193795 NP_001369698 NP_001369699 NP_001369700 NP_001369701 NP_001369702 NP_001369703 NP_852004 XM_005245139 XM_005245140 XM_017001199 XM_017001201 XP_005245196 XP_005245197 XP_016856688 XP_016856690	12
chr11	111870665	111879915	9251	*	2	2541	17057	FALSE	chr11	111878935	111885975	7041	+	111879561	111883880	64776	64776	C11orf1	NM_001330371 NM_022761 NP_001317300 NP_073598 XM_011542957 XM_011542958 XP_011541259 XP_011541260	6
chr11	111870665	111879915	9251	*	2	2541	17057	FALSE	chr11	111912734	111918850	6117	+	111912830	111913895	3316	3316	HSPB2	NM_001541 NP_001532	3
chr11	111870665	111879915	9251	*	2	2541	17057	FALSE	chr11	111912742	111926871	14130	+	111912830	111925714	100528019	100528019	HSPB2-C11orf52	NR_037651	6
chr11	111870665	111879915	9251	*	2	2541	17057	FALSE	chr11	111918913	111926871	7959	+	111918973	111926199	91894	91894	C11orf52	NM_080659 NP_542390	4
chr11	111870665	111879915	9251	*	2	2541	17057	FALSE	chr11	111768668	111879425	110758	-	111786057	111879132	79796	79796	ALG9	NM_001077690 NM_001077691 NM_001077692 NM_001352409 NM_001352410 NM_001352411 NM_001352412 NM_001352413 NM_001352414 NM_001352415 NM_001352416 NM_001352417 NM_001352418 NM_001352419 NM_001352420 NM_001352421 NM_001352422 NM_001352423 NM_024740 NP_001071158 NP_001071159 NP_001071160 NP_001339338 NP_001339339 NP_001339340 NP_001339341 NP_001339342 NP_001339343 NP_001339344 NP_001339345 NP_001339346…	31
chr11	111870665	111879915	9251	*	2	2541	17057	FALSE	chr11	111870295	111881243	10949	-	111871452	111880820	91893	91893	FDXACB1	NM_138378 NP_612387 NR_038364	8
chr11	111870665	111879915	9251	*	2	2541	17057	FALSE	chr11	111927144	112022653	95510	+	111929854	112019036	85458	85458	DIXDC1	NM_001037954 NM_001278542 NM_033425 NP_001033043 NP_001265471 NP_219493 XM_017018466 XM_017018467 XM_017018468 XM_017018469 XM_024448742 XM_024448743 XP_016873955 XP_016873956 XP_016873957 XP_016873958 XP_024304510 XP_024304511	24
chr11	65496756	65507971	11216	*	2	2628	17035.6	FALSE	chr11	65525077	65538704	13628	+	65525154	65538566	57410	57410	SCYL1	NM_001048218 NM_020680 NP_001041683 NP_065731 XM_005274118 XM_005274120 XM_005274121 XM_017018030 XM_017018031 XM_017018033 XM_024448619 XM_024448620 XP_005274175 XP_005274177 XP_005274178 XP_016873519 XP_016873520 XP_016873522 XP_024304387 XP_024304388	16
chr11	62645824	62679540	33717	*	5	5855	16935.5	FALSE	chr11	62593214	62601865	8652	-	62593875	62601450	9219	9219	MTA2	NM_001330292 NM_004739 NP_001317221 NP_004730	15
chr11	62645824	62679540	33717	*	5	5855	16935.5	FALSE	chr11	62602218	62612775	10558	-	62602302	62612457	256364	256364	EML3	NM_001300793 NM_001300794 NM_153265 NP_001287722 NP_001287723 NP_694997 XM_005273878 XM_006718489 XM_006718490 XM_006718491 XM_011544896 XM_011544897 XM_017017480 XM_017017481 XM_017017482 XP_005273935 XP_006718552 XP_006718553 XP_006718554 XP_011543198 XP_011543199 XP_016872969 XP_016872970 XP_016872971	19
chr11	62645824	62679540	33717	*	5	5855	16935.5	FALSE	chr11	62665309	62668496	3188	+	62665880	62667051	751071	751071	CSKMT	NM_001043229 NP_001036694 XM_005274232 XP_005274289	2
chr11	62645824	62679540	33717	*	5	5855	16935.5	FALSE	chr11	62615296	62622154	6859	-	62615701	62621947	26229	26229	B3GAT3	NM_001288721 NM_001288722 NM_001288723 NM_012200 NP_001275650 NP_001275651 NP_001275652 NP_036332 NR_109991	6
chr11	62645824	62679540	33717	*	5	5855	16935.5	FALSE	chr11	62670273	62673686	3414	+	62671746	62672114	790955	790955	UQCC3	NM_001085372 NP_001078841	3
chr11	62645824	62679540	33717	*	5	5855	16935.5	FALSE	chr11	62624826	62646726	21901	-	62625815	62646599	23193	23193	GANAB	NM_001278192 NM_001278193 NM_001278194 NM_001329222 NM_001329223 NM_001329224 NM_001329225 NM_014610 NM_198334 NM_198335 NP_001265121 NP_001265122 NP_001265123 NP_001316151 NP_001316152 NP_001316153 NP_001316154 NP_938148 NP_938149 XM_017017412 XP_016872901	25
chr11	62645824	62679540	33717	*	5	5855	16935.5	FALSE	chr11	62707676	62709201	1526	+	62708296	62708806	2785	2785	GNG3	NM_012202 NP_036334 XM_006718500 XP_006718563	3
chr11	62645824	62679540	33717	*	5	5855	16935.5	FALSE	chr11	62646848	62665178	18331	-	62647020	62665169	80789	80789	INTS5	NM_030628 NP_085131	5
chr11	62645824	62679540	33717	*	5	5855	16935.5	FALSE	chr11	62662817	62665210	2394	-	62663050	62665169	102288414	102288414	C11orf98	NM_001286086 NP_001273015 NR_104414	2
chr11	62645824	62679540	33717	*	5	5855	16935.5	FALSE	chr11	62662817	62672267	9451	-	62663129	62672219	79081	79081	LBHD1	NM_001367940 NM_001367941 NM_001394596 NM_001394599 NM_001394601 NM_001394604 NM_001394606 NM_001394607 NM_001394609 NM_001394611 NM_001394612 NM_024099 NP_001354869 NP_001354870 NP_001381525 NP_001381528 NP_001381530 NP_001381533 NP_001381535 NP_001381536 NP_001381538 NP_001381540 NP_001381541 NP_077004	5
chr11	62645824	62679540	33717	*	5	5855	16935.5	FALSE	chr11	62676498	62679117	2620	-	62676562	62678923	51035	51035	UBXN1	NM_001286077 NM_001286078 NM_015853 NP_001273006 NP_001273007 NP_056937 XM_005274033 XM_017017874 XP_005274090 XP_016873363	2
chr11	62645824	62679540	33717	*	5	5855	16935.5	FALSE	chr11	62728069	62740284	12216	+	62728849	62738382	283237	283237	TTC9C	NM_001318812 NM_001318813 NM_001318814 NM_001318815 NM_001318816 NM_173810 NP_001305741 NP_001305742 NP_001305743 NP_001305744 NP_001305745 NP_776171 XR_247197	5
chr15	63599160	63611535	12376	*	4	4209	16862.2	FALSE	chr15	63597353	63602428	5076	+	63597393	63601686	283807	283807	FBXL22	NM_001367807 NM_001367808 NM_001367809 NM_203373 NP_001354736 NP_001354737 NP_001354738 NP_976307 XM_006720478 XM_011521468 XM_011521469 XM_011521472 XP_006720541 XP_011519770 XP_011519771 XP_011519774	3
chr17	47188255	47231410	43156	*	6	5592	16839.1	FALSE	chr17	47200446	47223679	23234	+	47209423	47223042	4635	4635	MYL4	NM_001002841 NM_002476 NP_001002841 NP_002467 XM_005257391 XM_011524839 XM_017024683 XM_024450766 XP_005257448 XP_011523141 XP_016880172 XP_024306534	9
chr17	47188255	47231410	43156	*	6	5592	16839.1	FALSE	chr17	47117703	47189422	71720	-	47120935	47189172	996	996	CDC27	NM_001114091 NM_001256 NM_001293089 NM_001293091 NM_001353035 NM_001353047 NM_001353049 NM_001353050 NM_001353051 NP_001107563 NP_001247 NP_001280018 NP_001280020 NP_001339964 NP_001339976 NP_001339978 NP_001339979 NP_001339980 NR_148340 XM_011525546 XM_011525547 XM_011525548 XM_011525549 XM_017025481 XM_017025484 XM_017025485 XM_017025486 XM_017025488 XM_024451052 XP_011523848 XP_011523849 XP_01…	22
chr17	47188255	47231410	43156	*	6	5592	16839.1	FALSE	chr17	47253827	47344292	90466	+	47253862	47328364	3690	3690	ITGB3	NM_000212 NP_000203	19
chr4	38662854	38673691	10838	*	2	5091	16798.4	FALSE	chr4	38664197	38701517	37321	+	38680626	38697263	51274	51274	KLF3	NM_016531 NP_057615 XM_017008279 XP_016863768 XR_001741235 XR_925142	6
chr17	81859935	81892285	32351	*	5	5198	16770.2	FALSE	chr17	81890790	81900991	10202	+	81894478	81900100	51529	51529	ANAPC11	NM_001002244 NM_001002245 NM_001002246 NM_001002247 NM_001002248 NM_001002249 NM_001289414 NM_001289415 NM_001289416 NM_001289417 NM_001289418 NM_001289419 NM_001289420 NM_016476 NP_001002244 NP_001002245 NP_001002246 NP_001002247 NP_001002248 NP_001002249 NP_001276343 NP_001276344 NP_001276345 NP_001276346 NP_001276349 NP_057560	9
chr17	81859935	81892285	32351	*	5	5198	16770.2	FALSE	chr17	81902238	81902905	668	+	81902278	81902748	256933	256933	NPB	NM_148896 NP_683694	2
chr17	81859935	81892285	32351	*	5	5198	16770.2	FALSE	chr17	81843159	81860856	17698	-	81844012	81860471	5034	5034	P4HB	NM_000918 NP_000909 XM_024450777 XP_024306545 XR_002958014	6
chr17	81859935	81892285	32351	*	5	5198	16770.2	FALSE	chr17	81867721	81871378	3658	-	81868379	81869930	396	396	ARHGDIA	NM_001185077 NM_001185078 NM_001301240 NM_001301241 NM_001301242 NM_001301243 NM_004309 NP_001172006 NP_001172007 NP_001288169 NP_001288170 NP_001288171 NP_001288172 NP_004300 NR_125441 XM_011523574 XP_011521876	4
chr17	81859935	81892285	32351	*	5	5198	16770.2	FALSE	chr17	81887835	81891586	3752	-	81888131	81891580	10189	10189	ALYREF	NM_005782 NP_005773 NR_158770	8
chr3	39141131	39153663	12533	*	2	3310	16707.7	FALSE	chr3	39096599	39107863	11265	-	39098236	39107541	64689	64689	GORASP1	NM_001278789 NM_001278790 NM_031899 NP_001265718 NP_001265719 NP_114105 NR_103866 NR_103867 XM_006713301 XM_011534020 XM_011534021 XM_017007050 XM_017007051 XM_017007052 XM_024453714 XP_006713364 XP_011532322 XP_011532323 XP_016862539 XP_016862540 XP_016862541 XP_024309482 XR_001740235 XR_002959569 XR_002959570 XR_002959571 XR_002959572 XR_002959573 XR_940493 XR_940494	8
chr3	39141131	39153663	12533	*	2	3310	16707.7	FALSE	chr3	39141855	39154562	12708	-	39143055	39146682	64651	64651	CSRNP1	NM_001320559 NM_001320560 NM_033027 NP_001307488 NP_001307489 NP_149016 XM_017007049 XP_016862538	6
chr3	196490171	196529005	38835	*	8	5887	16679.2	FALSE	chr3	196468783	196503768	34986	-	196471819	196503173	165918	165918	RNF168	NM_152617 NP_689830	6
chr3	196490171	196529005	38835	*	8	5887	16679.2	FALSE	chr3	196506879	196515346	8468	-	196507887	196515209	255798	255798	SMCO1	NM_001077657 NM_001320473 NP_001071125 NP_001307402 XM_024453435 XP_024309203	3
chr3	196490171	196529005	38835	*	8	5887	16679.2	FALSE	chr3	196568611	196589059	20449	+	196568985	196584318	200933	200933	FBXO45	NM_001105573 NP_001099043	3
chr6	42770648	42792118	21471	*	4	3920	16581.3	FALSE	chr6	42696598	42722597	26000	-	42698295	42722334	5961	5961	PRPH2	NM_000322 NP_000313 XR_427834 XR_926295	3
chr6	42770648	42792118	21471	*	4	3920	16581.3	FALSE	chr6	42744498	42746103	1606	-	42745033	42746073	6903	6903	TBCC	NM_003192 NP_003183	1
chr5	97182930	97193117	10188	*	2	1784	16574.2	FALSE	chr5	97091867	97142753	50887	-	97094748	97142576	167410	167410	LIX1	NM_153234 NP_694966	7
chr5	97182930	97193117	10188	*	2	1784	16574.2	FALSE	chr5	97160867	97183247	22381	-	97163061	97183191	55781	55781	RIOK2	NM_001159749 NM_018343 NP_001153221 NP_060813 XM_017009628 XP_016865117	11
chr5	115601640	115634844	33205	*	5	4101	16572.1	FALSE	chr5	115578496	115602479	23984	-	115580549	115581256	353376	353376	TICAM2	NM_021649 NP_067681	3
chr5	115601640	115634844	33205	*	5	4101	16572.1	FALSE	chr5	115613210	115626036	12827	-	115616209	115625792	51014	51014	TMED7	NM_181836 NP_861974	3
chr5	115601640	115634844	33205	*	5	4101	16572.1	FALSE	chr5	115578642	115632992	54351	-	115580549	115625792	100302736	100302736	TMED7-TICAM2	NM_001164468 NM_001164469 NP_001157940 NP_001157941	5
chr6	33570572	33593501	22930	*	7	5515	16536.4	FALSE	chr6	33620365	33696574	76210	+	33621603	33695780	3710	3710	ITPR3	NM_002224 NP_002215 XM_011514577 XM_017010832 XP_011512879 XP_016866321	59
chr6	33570572	33593501	22930	*	7	5515	16536.4	FALSE	chr6	33572547	33580293	7747	-	33573803	33577604	578	578	BAK1	NM_001188 NP_001179 XM_011514779 XM_011514780 XP_011513081 XP_011513082	7
chr17	75238447	75271820	33374	*	4	4494	16536.3	FALSE	chr17	75261674	75266376	4703	+	75261901	75265923	51081	51081	MRPS7	NM_015971 NP_057055	4
chr17	75238447	75271820	33374	*	4	4494	16536.3	FALSE	chr17	75236599	75262363	25765	-	75237449	75261587	23163	23163	GGA3	NM_001172703 NM_001172704 NM_001291641 NM_001291642 NM_014001 NM_138619 NP_001166174 NP_001166175 NP_001278570 NP_001278571 NP_054720 NP_619525 XM_011524563 XM_017024385 XM_017024386 XM_017024387 XM_017024388 XM_017024389 XM_017024390 XM_017024392 XM_024450665 XP_011522865 XP_016879874 XP_016879875 XP_016879876 XP_016879877 XP_016879878 XP_016879879 XP_016879881 XP_024306433	13
chr17	75238447	75271820	33374	*	4	4494	16536.3	FALSE	chr17	75266228	75271231	5004	-	75266740	75270740	57409	57409	MIF4GD	NM_001242498 NM_001242500 NM_001242501 NM_001363806 NM_001365751 NM_001365752 NM_001365753 NM_001365754 NM_001365755 NM_001370592 NM_020679 NP_001229427 NP_001229429 NP_001229430 NP_001350735 NP_001352680 NP_001352681 NP_001352682 NP_001352683 NP_001352684 NP_001357521 NP_065730 XM_011525052 XM_011525054 XM_011525055 XM_017024888 XM_017024889 XM_017024890 XM_017024891 XM_017024895 XP_011523354 XP…	3
chr5	109688989	109696309	7321	*	2	3012	16487.6	FALSE	chr5	109689927	109869625	179699	+	109690418	109866998	4124	4124	MAN2A1	NM_002372 NP_002363 XM_011543395 XM_017009472 XM_024446048 XP_011541697 XP_016864961 XP_024301816 XR_001742067	24
chr17	21275449	21293891	18443	*	4	3487	16396.8	FALSE	chr17	21284672	21315232	30561	+	21284921	21314230	5606	5606	MAP2K3	NM_001316332 NM_002756 NM_145109 NM_145110 NP_001303261 NP_002747 NP_659731 XM_005256723 XM_011523958 XM_011523959 XM_017024857 XM_017024858 XM_017024859 XP_005256780 XP_011522260 XP_011522261 XP_016880346 XP_016880347 XP_016880348	16
chr17	21275449	21293891	18443	*	4	3487	16396.8	FALSE	chr17	21238870	21253410	14541	-	21243313	21253264	256302	256302	NATD1	NM_152914 NP_690878	3
chr2	39119971	39141913	21943	*	4	4528	16395.1	FALSE	chr2	38962206	39124345	162140	-	38962801	39124345	6654	6654	SOS1	NM_001382394 NM_001382395 NM_005633 NP_001369323 NP_001369324 NP_005624 XM_011533064 XP_011531366	27
chr15	74931688	74957832	26145	*	4	4103	16376.6	FALSE	chr15	74899992	74906883	6892	-	74902619	74906800	57184	57184	FAM219B	NM_001321920 NM_001321921 NM_001321922 NM_001321923 NM_020447 NP_001308849 NP_001308850 NP_001308851 NP_001308852 NP_065180 NR_135841 NR_135842 NR_135843 NR_135844 NR_135845 NR_135846 NR_135847 NR_135848 NR_135849 NR_135850 NR_135851 NR_135852 NR_135853 NR_135854 XM_017022433 XP_016877922 XR_002957668 XR_243117 XR_243118 XR_429468	2
chr15	74931688	74957832	26145	*	4	4103	16376.6	FALSE	chr15	74957219	75021495	64277	+	75011840	75018983	192683	192683	SCAMP5	NM_001178111 NM_001178112 NM_138967 NP_001171582 NP_001171583 NP_620417 NR_033660 XM_006720420 XM_006720421 XM_006720422 XM_017021989 XP_006720483 XP_006720484 XP_006720485 XP_016877478	13
chr15	74931688	74957832	26145	*	4	4103	16376.6	FALSE	chr15	74919791	74938083	18293	-	74920320	74938014	9377	9377	COX5A	NM_004255 NP_004246	6
chr15	74931688	74957832	26145	*	4	4103	16376.6	FALSE	chr15	74954418	74956772	2355	-	74955984	74956583	54913	54913	RPP25	NM_017793 NP_060263	1
chr15	55402417	55408689	6273	*	2	2034	16325.4	FALSE	chr15	55408495	55418798	10304	+	55408769	55418570	145788	145788	PIERCE2	NM_001198784 NP_001185713	3
chr15	55402417	55408689	6273	*	2	2034	16325.4	FALSE	chr15	55340032	55408510	68479	-	55340343	55389424	9236	9236	CCPG1	NM_001204450 NM_001204451 NM_004748 NM_020739 NP_001191379 NP_001191380 NP_004739 NP_065790	13
chr5	55970188	55995741	25554	*	4	2697	16312.7	FALSE	chr5	55935095	55995022	59928	-	55941082	55976278	3572	3572	IL6ST	NM_001190981 NM_001364275 NM_001364276 NM_001364277 NM_001364278 NM_001364279 NM_002184 NM_175767 NP_001177910 NP_001351204 NP_001351205 NP_001351206 NP_001351207 NP_001351208 NP_002175 NP_786943 NR_120480 NR_157112	19
chr14	35390674	35417219	26546	*	6	4001	16303.9	FALSE	chr14	35401513	35404749	3237	-	35402013	35404644	4792	4792	NFKBIA	NM_020529 NP_065390	5
chr5	133051062	133064308	13247	*	3	3095	16301.9	FALSE	chr5	133052013	133106449	54437	+	133052251	133104436	3308	3308	HSPA4	NM_002154 NM_198431 NP_002145	20
chr5	133051062	133064308	13247	*	3	3095	16301.9	FALSE	chr5	132996985	133026604	29620	-	132998583	133026537	54819	54819	ZCCHC10	NM_001300816 NM_001300817 NM_001300818 NM_001300819 NM_001300822 NM_001308127 NM_001308128 NM_001308129 NM_001308130 NM_017665 NP_001287745 NP_001287746 NP_001287747 NP_001287748 NP_001287751 NP_001295056 NP_001295057 NP_001295058 NP_001295059 NP_060135 NR_125337 NR_131766 NR_131767 XM_011543502 XM_011543503 XP_011541804 XP_011541805	7
chr1	161706378	161807474	101097	*	12	8866	16271.6	FALSE	chr1	161706972	161714352	7381	+	161707214	161713380	84824	84824	FCRLA	NM_001184866 NM_001184867 NM_001184870 NM_001184871 NM_001184872 NM_001184873 NM_001366195 NM_001366196 NM_032738 NP_001171795 NP_001171796 NP_001171799 NP_001171800 NP_001171801 NP_001171802 NP_001353124 NP_001353125 NP_116127 XM_006711581 XM_011510065 XP_006711644 XP_011508367	4
chr1	161706378	161807474	101097	*	12	8866	16271.6	FALSE	chr1	161721563	161728143	6581	+	161722673	161727662	127943	127943	FCRLB	NM_001002901 NM_001288829 NM_001288830 NM_001288831 NM_001288832 NM_001320241 NM_152378 NP_001002901 NP_001275758 NP_001275759 NP_001275760 NP_001275761 NP_001307170	7
chr1	161706378	161807474	101097	*	12	8866	16271.6	FALSE	chr1	161749758	161757238	7481	+	161749802	161756947	11266	11266	DUSP12	NM_007240 NP_009171 XM_005244862 XP_005244919	7
chr1	161706378	161807474	101097	*	12	8866	16271.6	FALSE	chr1	161766298	161977574	211277	+	161766361	161958654	22926	22926	ATF6	NM_007348 NP_031374 XM_006711224 XM_011509308 XM_011509309 XM_011509310 XP_006711287 XP_011507610 XP_011507611 XP_011507612	24
chr2	197434508	197454200	19693	*	3	3027	16269.5	FALSE	chr2	197453493	197475310	21818	+	197453561	197473924	80219	80219	COQ10B	NM_001320818 NM_001320819 NM_001320820 NM_025147 NP_001307747 NP_001307748 NP_001307749 NP_079423	6
chr2	197434508	197454200	19693	*	3	3027	16269.5	FALSE	chr2	197388515	197435079	46565	-	197392303	197434999	23451	23451	SF3B1	NM_001005526 NM_001308824 NM_012433 NP_001005526 NP_001295753 NP_036565 XR_001738680 XR_001738681 XR_241302	26
chr2	197434508	197454200	19693	*	3	3027	16269.5	FALSE	chr2	197500140	197503449	3310	+	197500437	197503259	3336	3336	HSPE1	NM_002157 NP_002148	2
chr2	197434508	197454200	19693	*	3	3027	16269.5	FALSE	chr2	197500413	197550726	50314	+	197500437	197550646	100529241	100529241	HSPE1-MOB4	NM_001202485 NP_001189414	9
chr7	35680603	35695618	15016	*	4	3020	16243.2	FALSE	chr7	35632659	35697459	64801	-	35633690	35694330	64224	64224	HERPUD2	NM_022373 NP_071768 XM_006715765 XM_017012506 XP_006715828 XP_016867995 XR_001744846 XR_926944	11
chr19	16628080	16661868	33789	*	4	5007	16241.9	FALSE	chr19	16661139	16690023	28885	+	16661218	16688943	79041	79041	TMEM38A	NM_024074 NP_076979	6
chr19	16628080	16661868	33789	*	4	5007	16241.9	FALSE	chr19	16577642	16660442	82801	-	16578336	16660110	79086	79086	SMIM7	NM_001300925 NM_024104 NP_001287854 NP_077009 XR_001753759 XR_001753760 XR_001753761 XR_244083 XR_244084 XR_244085 XR_244086	13
chr19	16628080	16661868	33789	*	4	5007	16241.9	FALSE	chr19	16479067	16629062	149996	-	16566585	16628959	9441	9441	MED26	NM_004831 NP_004822	15
chr19	46705059	46729483	24425	*	4	4094	16202.9	FALSE	chr19	46647551	46661182	13632	-	46648482	46661064	147906	147906	DACT3	NM_001301046 NM_145056 NP_001287975 NP_659493 XM_011526499 XM_011526500 XM_017026334 XP_011524801 XP_011524802 XP_016881823	5
chr19	46705059	46729483	24425	*	4	4094	16202.9	FALSE	chr19	46674275	46717127	42853	-	46674523	46716370	25865	25865	PRKD2	NM_001079880 NM_001079881 NM_001079882 NM_016457 NP_001073349 NP_001073350 NP_001073351 NP_057541 XM_005258716 XP_005258773	20
chr19	46705059	46729483	24425	*	4	4094	16202.9	FALSE	chr19	46746046	46776988	30943	+	46755451	46756938	79147	79147	FKRP	NM_001039885 NM_024301 NP_001034974 NP_077277 XM_005259247 XM_005259248 XM_005259249 XM_011527306 XM_011527307 XM_017027297 XM_024451707 XP_005259304 XP_005259305 XP_005259306 XP_011525608 XP_011525609 XP_016882786 XP_024307475	11
chr19	44747301	44754845	7545	*	4	2431	16192.4	FALSE	chr19	44777869	44800652	22784	+	44777932	44800443	23624	23624	CBLC	NM_001130852 NM_012116 NP_001124324 NP_036248 XM_005258696 XM_011526688 XM_011526689 XM_011526690 XP_005258753 XP_011524990 XP_011524991 XP_011524992 XR_243917 XR_935783	11
chr19	44747301	44754845	7545	*	4	2431	16192.4	FALSE	chr19	44747705	44760044	12340	+	44748791	44759615	602	602	BCL3	NM_005178 NP_005169 XM_011527197 XM_011527198 XM_011527200 XM_017027109 XM_017027110 XP_011525499 XP_011525500 XP_011525502 XP_016882598 XP_016882599	10
chr9	97982497	98019535	37039	*	5	4563	16163.4	FALSE	chr9	97983341	98015943	32603	+	97983556	98015431	10541	10541	ANP32B	NM_006401 NP_006392	9
chr9	97982497	98019535	37039	*	5	4563	16163.4	FALSE	chr9	97926791	97944856	18066	-	97927384	97938136	55363	55363	HEMGN	NM_018437 NM_197978 NP_060907 NP_932095 XM_005252086 XP_005252143	5
chr9	97982497	98019535	37039	*	5	4563	16163.4	FALSE	chr9	98056732	98083077	26346	+	98056809	98083055	54187	54187	NANS	NM_018946 NP_061819 XM_011518787 XM_011518788 XM_017014811 XM_024447574 XP_011517089 XP_011517090 XP_016870300 XP_024303342	6
chr7	127650891	127668862	17972	*	3	3523	16145.1	FALSE	chr7	127652194	128092609	440416	+	127652374	128092058	27044	27044	SND1	NM_014390 NP_055205 XM_017011987 XP_016867476	35
chr7	127650891	127668862	17972	*	3	3523	16145.1	FALSE	chr7	127610292	127618142	7851	-	127610852	127615928	5078	5078	PAX4	NM_001366110 NM_001366111 NM_006193 NP_001353039 NP_001353040	10
chr19	16103675	16119076	15402	*	3	2559	16137.2	FALSE	chr19	16111889	16134234	22346	+	16111902	16132324	4218	4218	RAB8A	NM_005370 NP_005361	9
chr19	16103675	16119076	15402	*	3	2559	16137.2	FALSE	chr19	16134028	16158575	24548	+	16148751	16157794	84941	84941	HSH2D	NM_001352265 NM_001352266 NM_001369808 NM_001369809 NM_001382417 NM_032855 NP_001339194 NP_001339195 NP_001356737 NP_001356738 NP_001369346 NP_116244 NR_111903 NR_111904 NR_163150 NR_163151 NR_163152 NR_163153 NR_163154 NR_163155 NR_163156	9
chr15	62046010	62068934	22925	*	5	3890	16117.9	FALSE	chr15	62066977	62070917	3941	+	62067614	62068723	145741	145741	C2CD4A	NM_207322 NP_997205	2
chr15	62046010	62068934	22925	*	5	3890	16117.9	FALSE	chr15	61852389	62060473	208085	-	61854457	62060374	54832	54832	VPS13C	NM_001018088 NM_017684 NM_018080 NM_020821 NP_001018098 NP_060154 NP_060550 NP_065872 XM_011521713 XM_011521714 XP_011520015 XP_011520016 XR_001751332 XR_931855	84
chr3	25768651	25790680	22030	*	5	4545	16116.4	FALSE	chr3	25783073	25794534	11462	+	25791021	25794494	54995	54995	OXSM	NM_001145391 NM_017897 NP_001138863 NP_060367 NR_026937 XM_006713216 XM_006713217 XM_017006714 XP_006713279 XP_006713280 XP_016862203	5
chr3	25768651	25790680	22030	*	5	4545	16116.4	FALSE	chr3	25718944	25790039	71096	-	25719460	25789865	55768	55768	NGLY1	NM_001145293 NM_001145294 NM_001145295 NM_018297 NM_025105 NP_001138765 NP_001138766 NP_001138767 NP_060767 XM_005265316 XM_005265317 XM_011533944 XM_017006839 XP_005265373 XP_005265374 XP_011532246 XP_016862328 XR_001740200 XR_002959548 XR_940471	16
chr6	36985923	37029840	43918	*	6	5087	16095.6	FALSE	chr6	37005646	37029069	23424	+	37005818	37028163	221472	221472	FGD2	NM_173558 NP_775829 XM_011514372 XM_011514373 XM_017010429 XP_011512674 XP_011512675 XP_016865918 XR_001743240 XR_001743241 XR_001743242 XR_001743243 XR_001743244 XR_001743245 XR_001743246 XR_001743247 XR_001743248 XR_001743249 XR_926106	12
chr6	36985923	37029840	43918	*	6	5087	16095.6	FALSE	chr6	36968141	36986298	18158	-	36968903	36986173	23787	23787	MTCH1	NM_001271641 NM_014341 NP_001258570 NP_055156 NR_130739 XM_005248978 XM_005248979 XM_011514450 XM_017010642 XM_017010643 XP_005249035 XP_005249036 XP_011512752 XP_016866131 XP_016866132	12
chr3	126179679	126205678	26000	*	4	3986	16088.2	FALSE	chr3	126103562	126197994	94433	-	126103791	126180968	10840	10840	ALDH1L1	NM_001270364 NM_001270365 NM_012190 NM_144776 NP_001257293 NP_001257294 NP_036322 NR_072979 XM_006713481 XM_011512355 XM_017005613 XM_017005614 XM_024453325 XP_006713544 XP_011510657 XP_016861102 XP_016861103 XP_024309093	26
chr17	44186459	44221345	34887	*	7	4278	16079	FALSE	chr17	44186970	44191929	4960	+	44187709	44190864	79089	79089	TMUB2	NM_001076674 NM_001330235 NM_001353173 NM_001353174 NM_001353175 NM_001353176 NM_001353177 NM_001353178 NM_001353180 NM_001353181 NM_001353182 NM_001353183 NM_001353184 NM_001353185 NM_001353186 NM_001353187 NM_001353188 NM_001353189 NM_001353190 NM_001353191 NM_024107 NM_177441 NP_001070142 NP_001317164 NP_001340102 NP_001340103 NP_001340104 NP_001340105 NP_001340106 NP_001340107 NP_001340109 NP…	5
chr17	44186459	44221345	34887	*	7	4278	16079	FALSE	chr17	44191805	44200113	8309	-	44194263	44198070	56970	56970	ATXN7L3	NM_001098833 NM_001382308 NM_001382309 NM_001382310 NM_001382311 NM_001382312 NM_001382313 NM_001382314 NM_001382315 NM_001382316 NM_020218 NP_001369237 NP_001369238 NP_001369239 NP_001369240 NP_001369241 NP_001369242 NP_001369243 NP_001369244 NP_001369245	13
chr17	44186459	44221345	34887	*	7	4278	16079	FALSE	chr17	44205033	44221626	16594	-	44207184	44218229	7343	7343	UBTF	NM_001076683 NM_001076684 NM_014233 NP_001070151 NP_001070152 NP_055048 NR_045058	25
chr8	38267652	38303737	36086	*	4	5112	16061.4	FALSE	chr8	38263130	38269243	6114	-	38264444	38269199	84513	84513	PLPP5	NM_001102559 NM_001102560 NM_001354452 NM_001354454 NM_001354456 NM_001354457 NM_001354458 NM_001354459 NM_032483 NP_001096029 NP_001096030 NP_001341381 NP_001341383 NP_001341385 NP_001341386 NP_001341387 NP_001341388 NP_115872 NR_148893 NR_148894 XM_011544670 XM_011544671 XM_011544672 XM_011544674 XM_011544675 XM_017013905 XM_017013906 XM_024447305 XM_024447306 XM_024447307 XP_011542972 XP_01154…	6
chr17	42535908	42587020	51113	*	8	8244	16033.8	FALSE	chr17	42536241	42562062	25822	+	42536273	42544238	4669	4669	NAGLU	NM_000263 NP_000254 XM_006721920 XM_017024687 XM_024450771 XM_024450772 XP_006721983 XP_016880176 XP_024306539 XP_024306540	8
chr17	42535908	42587020	51113	*	8	8244	16033.8	FALSE	chr17	42552922	42555214	2293	+	42552934	42554938	3292	3292	HSD17B1	NM_000413 NM_001330219 NP_000404 NP_001317148 NR_144397	4
chr17	42535908	42587020	51113	*	8	8244	16033.8	FALSE	chr17	42562134	42566277	4144	+	42562412	42565968	80347	80347	COASY	NM_001042529 NM_001042530 NM_001042531 NM_001042532 NM_025233 NP_001035994 NP_001035997 NP_079509 XM_006722116 XM_011525300 XP_006722179 XP_011523602	6
chr17	42535908	42587020	51113	*	8	8244	16033.8	FALSE	chr17	42567072	42573239	6168	+	42567125	42571603	6945	6945	MLX	NM_013383 NM_170607 NM_170608 NM_198204 NM_198205 NP_733752 NP_937847 NP_937848	4
chr17	42535908	42587020	51113	*	8	8244	16033.8	FALSE	chr17	42609641	42615238	5598	+	42609738	42615041	7283	7283	TUBG1	NM_001070 NP_001061 XM_024450904 XP_024306672	5
chr17	42535908	42587020	51113	*	8	8244	16033.8	FALSE	chr17	42572310	42577831	5522	-	42572968	42577686	29893	29893	PSMC3IP	NM_001256014 NM_001256015 NM_001256016 NM_013290 NM_016556 NP_001242943 NP_001242944 NP_001242945 NP_037422 NP_057640 NR_045669 NR_045670 NR_045671	7
chr19	2021837	2042886	21050	*	4	3291	16033	FALSE	chr19	1993101	2034881	41781	-	1993101	1997426	107985278	107985278	LOC107985278	XR_001753845	6
chr19	2021837	2042886	21050	*	4	3291	16033	FALSE	chr19	1985438	2015714	30277	-	1986488	2015703	55643	55643	BTBD2	NM_017797 NP_060267 XM_011528127 XP_011526429	10
chr3	156816297	156835724	19428	*	3	4972	16005.9	FALSE	chr3	156825481	157046129	220649	+	156829330	157045750	389170	389170	LEKR1	NM_001004316 NM_001193283 NP_001004316 NP_001180212	17
chr1	51850277	51879583	29307	*	4	5347	15933.7	FALSE	chr1	51789191	51878805	89615	-	51789236	51878615	4898	4898	NRDC	NM_001101662 NM_001242361 NM_002525 NP_001095132 NP_001229290 NP_002516	35
chr16	30650460	30659575	9116	*	2	3444	15932.1	FALSE	chr16	30698209	30745169	46961	+	30700825	30739733	10847	10847	SRCAP	NM_006662 NP_006653	36
chr16	30650460	30659575	9116	*	2	3444	15932.1	FALSE	chr16	30602558	30624012	21455	-	30604264	30610041	115509	115509	ZNF689	NM_138447 NP_612456 NR_073480 NR_073481 NR_073482 NR_104166	7
chr16	30650460	30659575	9116	*	2	3444	15932.1	FALSE	chr16	30658431	30670810	12380	+	30659519	30669645	64319	64319	FBRS	NM_001105079 NM_022452 NP_001098549 XM_011545916 XM_011545917 XM_011545919 XP_011544218 XP_011544219 XP_011544221	17
chr16	30650460	30659575	9116	*	2	3444	15932.1	FALSE	chr16	30650717	30656413	5697	+	30651646	30656311	78994	78994	PRR14	NM_001320464 NM_024031 NP_001307393 NP_076936	9
chr9	129007911	129036892	28982	*	4	4488	15881.6	FALSE	chr9	129036621	129072082	35462	+	129040595	129070453	84895	84895	MIGA2	NM_001329990 NM_032809 NP_001316919 NP_116198 NR_138421 NR_138422 NR_138423 NR_138424 NR_138425 XM_011519118 XP_011517420 XR_001746392 XR_001746393 XR_001746395 XR_001746396 XR_001746398 XR_929849 XR_929850 XR_929851	18
chr9	129007911	129036892	28982	*	4	4488	15881.6	FALSE	chr9	129007036	129028331	21296	-	129008684	129028154	56904	56904	SH3GLB2	NM_001287045 NM_001287046 NM_001369913 NM_001369914 NM_001369915 NM_020145 NP_001273974 NP_001273975 NP_001356842 NP_001356843 NP_001356844 NP_064530 NR_163192 XM_005252098 XM_005252101 XM_006717188 XM_006717189 XM_006717190 XM_006717191 XP_005252155 XP_005252158 XP_006717251 XP_006717252 XP_006717253 XP_006717254	11
chr9	129007911	129036892	28982	*	4	4488	15881.6	FALSE	chr9	129081111	129090438	9328	+	129081132	129089007	57171	57171	DOLPP1	NM_001135917 NM_020438 NP_001129389 NP_065171 NR_072983 XR_002956797	8
chr3	49006464	49022845	16382	*	3	4545	15848.6	FALSE	chr3	49007062	49015953	8892	+	49007342	49015288	11180	11180	WDR6	NM_001320546 NM_001320547 NM_018031 NP_001307475 NP_001307476 NP_060501	7
chr3	49006464	49022845	16382	*	3	4545	15848.6	FALSE	chr3	49020459	49023495	3037	+	49022145	49023172	25915	25915	NDUFAF3	NM_199069 NM_199070 NM_199073 NM_199074 NM_199417 NP_951032 NP_951033 NP_951047 NP_951056	5
chr3	49006464	49022845	16382	*	3	4545	15848.6	FALSE	chr3	49015488	49022293	6806	-	49015588	49018564	55152	55152	DALRD3	NM_001009996 NM_001276405 NM_018114 NP_001009996 NP_001263334 NP_060584 XM_005265269 XM_006713219 XM_011533891 XM_011533892 XM_011533893 XM_017006723 XP_005265326 XP_006713282 XP_011532193 XP_011532194 XP_011532195 XP_016862212 XR_001740191 XR_940464	4
chr19	13151893	13167891	15999	*	3	3692	15836.4	FALSE	chr19	13099033	13103161	4129	-	13099319	13101171	4066	4066	LYL1	NM_005583 NP_005574	4
chr19	13151893	13167891	15999	*	3	3692	15836.4	FALSE	chr19	13104902	13117567	12666	-	13104935	13116399	55621	55621	TRMT1	NM_001136035 NM_001142554 NM_001351760 NM_001351761 NM_001351762 NM_017722 NP_001129507 NP_001136026 NP_001338689 NP_001338690 NP_001338691 NP_060192	13
chr19	13151893	13167891	15999	*	3	3692	15836.4	FALSE	chr19	13144058	13150383	6326	-	13144081	13150173	8677	8677	STX10	NM_001271609 NM_001271610 NM_001271611 NM_003765 NP_001258538 NP_001258539 NP_001258540 NP_003756 XM_011528397 XP_011526699	5
chr19	13151893	13167891	15999	*	3	3692	15836.4	FALSE	chr19	13150411	13154911	4501	+	13153187	13153858	9592	9592	IER2	NM_004907 NP_004898	2
chr2	85577455	85616464	39010	*	6	6073	15833.8	FALSE	chr2	85584431	85593406	8976	+	85584491	85593157	10791	10791	VAMP5	NM_006634 NP_006625	3
chr2	85577455	85616464	39010	*	6	6073	15833.8	FALSE	chr2	85595725	85597708	1984	+	85595764	85597565	51255	51255	RNF181	NM_016494 NP_057578 XM_005264359 XP_005264416	2
chr2	85577455	85616464	39010	*	6	6073	15833.8	FALSE	chr2	85602856	85649283	46428	+	85612326	85648808	10713	10713	USP39	NM_001256725 NM_001256726 NM_001256727 NM_001256728 NM_006590 NP_001243654 NP_001243655 NP_001243656 NP_001243657 NP_006581 NR_046347 XM_006711922 XM_006711923 XM_011532487 XM_011532488 XM_017003182 XP_006711985 XP_006711986 XP_011530789 XP_011530790 XP_016858671 XR_001738593 XR_939652 XR_939653	19
chr2	85577455	85616464	39010	*	6	6073	15833.8	FALSE	chr2	85544720	85561532	16813	-	85549934	85561428	2677	2677	GGCX	NM_000821 NM_001142269 NM_001311312 NP_000812 NP_001135741 NP_001298241 XM_005264259 XM_011532764 XM_011532765 XM_017003803 XP_005264316 XP_011531066 XP_011531067 XP_016859292 XR_001738703	7
chr2	85577455	85616464	39010	*	6	6073	15833.8	FALSE	chr2	85598547	85603196	4650	-	85599076	85601948	129303	129303	TMEM150A	NM_001031738 NM_001369917 NM_153342 NP_001026908 NP_001356846 NP_699173 XM_006711930 XM_006711931 XM_006711932 XM_011532505 XM_011532507 XM_011532508 XM_017003305 XM_017003306 XM_017003307 XP_006711993 XP_006711994 XP_006711995 XP_011530807 XP_011530809 XP_011530810 XP_016858794 XP_016858795 XP_016858796	9
chr2	85577455	85616464	39010	*	6	6073	15833.8	FALSE	chr2	85605254	85612066	6813	-	85608945	85611984	388969	388969	C2orf68	NM_001013649 NP_001013671 XM_005264305 XM_024452879 XP_005264362 XP_024308647 XR_002959297	3
chr19	10864545	10899489	34945	*	8	4025	15798.2	FALSE	chr19	10871553	10923075	51523	+	10871703	10921757	10498	10498	CARM1	NM_001370088 NM_001370089 NM_199141 NP_001357017 NP_001357018 NP_954592 XM_011527638 XP_011525940	15
chr19	10864545	10899489	34945	*	8	4025	15798.2	FALSE	chr19	10832067	10836318	4252	-	10832937	10836191	11018	11018	TMED1	NM_006858 NP_006849 NR_104015 XM_006722631 XP_006722694	5
chr19	10864545	10899489	34945	*	8	4025	15798.2	FALSE	chr19	10928811	10930254	1444	+	10928823	10929702	90580	90580	TIMM29	NM_138358 NP_612367	2
chr4	185412412	185426430	14019	*	2	2486	15796.9	FALSE	chr4	185426249	185449826	23578	+	185429412	185449644	441054	441054	C4orf47	NM_001114357 NM_001346007 NP_001107829 NP_001332936 XM_005263019 XM_011531989 XM_017008236 XM_017008237 XM_017008238 XM_017008239 XM_017008240 XM_017008241 XP_005263076 XP_011530291 XP_016863725 XP_016863726 XP_016863727 XP_016863728 XP_016863729 XP_016863730	8
chr4	185412412	185426430	14019	*	2	2486	15796.9	FALSE	chr4	185363872	185395924	32053	-	185367180	185378186	55805	55805	LRP2BP	NM_001377440 NM_001377441 NM_001377442 NM_001377443 NM_001385601 NM_001385602 NM_001385603 NM_001385604 NM_001385605 NM_001385606 NM_018409 NP_001364369 NP_001364370 NP_001364371 NP_001364372 NP_001372530 NP_001372531 NP_001372532 NP_001372533 NP_001372534 NP_001372535 NP_060879 XM_011532111 XM_017008410 XM_017008411 XM_024454134 XM_024454135 XM_024454138 XP_011530413 XP_016863899 XP_016863900 XP…	8
chr4	185412412	185426430	14019	*	2	2486	15796.9	FALSE	chr4	185399537	185425979	26443	-	185400392	185425868	55325	55325	UFSP2	NM_018359 NP_060829 NR_028085 NR_144317	13
chr22	23107138	23157242	50105	*	9	5298	15792.8	FALSE	chr22	23145366	23165663	20298	+	23146617	23161564	9609	9609	RAB36	NM_001349877 NM_001349878 NM_004914 NP_001336806 NP_001336807 NP_004905 NR_146295 XM_006724381 XM_011530544 XM_011530545 XM_011530546 XM_011530547 XM_011530550 XM_011530552 XM_017029104 XM_017029105 XM_017029106 XM_017029107 XP_006724444 XP_011528846 XP_011528847 XP_011528848 XP_011528849 XP_011528852 XP_011528854 XP_016884593 XP_016884594 XP_016884595 XP_016884596 XR_001755380 XR_001755381 XR_00…	11
chr22	23107138	23157242	50105	*	9	5298	15792.8	FALSE	chr22	23179704	23318037	138334	+	23180961	23315522	613	613	BCR	NM_004327 NM_021574 NP_004318 NP_067585	30
chr22	23107138	23157242	50105	*	9	5298	15792.8	FALSE	chr22	23059415	23145021	85607	-	23059462	23140420	27156	27156	RSPH14	NM_014433 NP_055248 XM_011530149 XM_011530150 XM_011530151 XM_011530152 XM_011530154 XM_011530155 XM_017028774 XP_011528451 XP_011528452 XP_011528453 XP_011528454 XP_011528456 XP_011528457 XP_016884263	11
chr17	76709588	76738230	28643	*	4	4568	15778.9	FALSE	chr17	76726830	76738522	11693	+	76729711	76738346	124512	124512	METTL23	NM_001080510 NM_001206983 NM_001206984 NM_001206985 NM_001206986 NM_001206987 NM_001302703 NM_001302704 NM_001302705 NM_001378348 NM_001378349 NM_001378350 NM_001378351 NM_001378352 NM_001378353 NM_001378354 NP_001073979 NP_001193912 NP_001193913 NP_001193914 NP_001193915 NP_001193916 NP_001289632 NP_001289633 NP_001289634 NP_001365277 NP_001365278 NP_001365279 NP_001365280 NP_001365281 NP_001365…	4
chr17	76709588	76738230	28643	*	4	4568	15778.9	FALSE	chr17	76735865	76781449	45585	+	76738353	76781226	79157	79157	MFSD11	NM_001242532 NM_001242533 NM_001242534 NM_001242535 NM_001242536 NM_001242537 NM_001353017 NM_001353018 NM_001353019 NM_024311 NP_001229461 NP_001229462 NP_001229463 NP_001229464 NP_001229465 NP_001229466 NP_001339946 NP_001339947 NP_001339948 NP_077287 NR_148229 NR_148230 NR_148231 NR_148232 NR_148233 NR_148234 NR_148235 NR_148236 NR_148237 NR_148238 NR_148239 NR_148240 NR_148242 XM_011525236 XM…	19
chr17	76709588	76738230	28643	*	4	4568	15778.9	FALSE	chr17	76672551	76711004	38454	-	76677588	76710946	439921	439921	MXRA7	NM_001008528 NM_001008529 NM_001363769 NM_001387276 NM_001387277 NM_001387278 NM_198530 NP_001008528 NP_001008529 NP_001350698 NP_001374205 NP_001374206 NP_001374207 NP_940932 NR_130926 NR_130927 NR_130928	7
chr17	76709588	76738230	28643	*	4	4568	15778.9	FALSE	chr17	76712832	76726799	13968	-	76716686	76726475	23210	23210	JMJD6	NM_001081461 NM_015167 NP_001074930 NP_055982 XR_001752456 XR_001752457 XR_002957986 XR_934428 XR_934429	8
chr17	76709588	76738230	28643	*	4	4568	15778.9	FALSE	chr17	76734115	76737333	3219	-	76736161	76737160	6427	6427	SRSF2	NM_001195427 NM_003016 NP_001182356 NP_003007 NR_036608 XM_017024942 XP_016880431 XR_002958053 XR_002958054 XR_002958055 XR_429913 XR_429914	2
chr3	169764288	169781356	17069	*	3	2956	15772.5	FALSE	chr3	169773396	169789716	16321	+	169774296	169786678	55892	55892	MYNN	NM_001185118 NM_001185119 NM_018657 NP_001172047 NP_001172048 NP_061127 NR_033702 NR_033703	10
chr3	169764288	169781356	17069	*	3	2956	15772.5	FALSE	chr3	169812870	169837773	24904	+	169821922	169837631	344657	344657	LRRIQ4	NM_001080460 NP_001073929 XM_006713613 XM_011512748 XM_011512749 XP_006713676 XP_011511050 XP_011511051 XR_924128	7
chr3	169764288	169781356	17069	*	3	2956	15772.5	FALSE	chr3	169766921	169769561	2641	-	169767432	169769520	84517	84517	ACTRT3	NM_032487 NP_115876	2
chr1	46319212	46348354	29143	*	5	4717	15757.1	FALSE	chr1	46340789	46365152	24364	+	46340827	46361846	387338	387338	NSUN4	NM_001256127 NM_001256128 NM_001387265 NM_001387266 NM_001387267 NM_001387268 NM_001387269 NM_001387270 NM_001387271 NM_001387272 NM_199044 NP_001243056 NP_001243057 NP_001374194 NP_001374195 NP_001374196 NP_001374197 NP_001374198 NP_001374199 NP_001374200 NP_001374201 NP_950245 NR_045789 NR_045790 NR_045791 NR_170617 NR_170618 NR_170619 NR_170620 NR_170621 NR_170622 NR_170623 NR_170624	7
chr1	46319212	46348354	29143	*	5	4717	15757.1	FALSE	chr1	46261196	46303616	42421	-	46261404	46303322	10489	10489	LRRC41	NM_006369 NP_006360 XR_002957992 XR_002957994	12
chr1	46319212	46348354	29143	*	5	4717	15757.1	FALSE	chr1	46394317	46413848	19532	+	46394349	46413575	2166	2166	FAAH	NM_001441 NP_001432	14
chr19	45467265	45493308	26044	*	5	4422	15745.6	FALSE	chr19	45488777	45502513	13737	+	45498473	45502200	147699	147699	PPM1N	NM_001080401 NM_178494 NP_001073870 XR_001753603 XR_002958254	6
chr19	45467265	45493308	26044	*	5	4422	15745.6	FALSE	chr19	45407334	45478828	71495	-	45409675	45423374	2067	2067	ERCC1	NM_001166049 NM_001369408 NM_001369409 NM_001369410 NM_001369411 NM_001369412 NM_001369413 NM_001369414 NM_001369415 NM_001369416 NM_001369417 NM_001369418 NM_001369419 NM_001983 NM_202001 NP_001159521 NP_001356337 NP_001356338 NP_001356339 NP_001356340 NP_001356341 NP_001356342 NP_001356343 NP_001356344 NP_001356345 NP_001356346 NP_001356347 NP_001356348 NP_001974 NP_973730	17
chr19	45467265	45493308	26044	*	5	4422	15745.6	FALSE	chr19	45467995	45475179	7185	+	45468587	45473012	2354	2354	FOSB	NM_001114171 NM_006732 NP_001107643 NP_006723 XM_005258691 XP_005258748	3
chr19	45467265	45493308	26044	*	5	4422	15745.6	FALSE	chr19	45485294	45497055	11762	-	45485708	45496825	6253	6253	RTN2	NM_005619 NM_206900 NM_206901 NM_206902 NP_005610 NP_996783 NP_996784	10
chr19	45467265	45493308	26044	*	5	4422	15745.6	FALSE	chr19	45506579	45526983	20405	+	45507772	45526177	7408	7408	VASP	NM_001008736 NM_003370 NP_003361 XM_005259199 XM_005259200 XM_017027200 XP_005259256 XP_005259257 XP_016882689	13
chr14	103679149	103724304	45156	*	7	5856	15736.5	FALSE	chr14	103715730	103733668	17939	+	103715842	103733018	79038	79038	ZFYVE21	NM_001198953 NM_024071 NP_001185882 NP_076976	5
chr14	103679149	103724304	45156	*	7	5856	15736.5	FALSE	chr14	103697609	103715504	17896	-	103698798	103711087	7517	7517	XRCC3	NM_001100118 NM_001100119 NM_001371229 NM_001371231 NM_001371232 NM_005432 NP_001093588 NP_001093589 NP_001358158 NP_001358160 NP_001358161 NP_005423 XM_005268046 XP_005268103	14
chr7	108569077	108570870	1794	*	1	1794	15712.8	FALSE	chr7	108569867	108574850	4984	+	108571727	108573353	4189	4189	DNAJB9	NM_012328 NP_036460	3
chr7	108569077	108570870	1794	*	1	1794	15712.8	FALSE	chr7	108470417	108569666	99250	-	108472401	108515491	50640	50640	PNPLA8	NM_001256007 NM_001256008 NM_001256009 NM_001256010 NM_001256011 NM_015723 NP_001242936 NP_001242937 NP_001242938 NP_001242939 NP_001242940 NP_056538 XM_005250396 XM_011516274 XM_011516275 XM_017012261 XP_005250453 XP_011514576 XP_011514577 XP_016867750 XR_001744793 XR_001744795 XR_001744796 XR_001744797 XR_001744798	15
chr7	108569077	108570870	1794	*	1	1794	15712.8	FALSE	chr7	108554543	108569750	15208	-	108564191	108569569	168451	168451	THAP5	NM_001130475 NM_001287598 NM_001287599 NM_001287601 NM_182529 NP_001123947 NP_001274527 NP_001274528 NP_001274530 NP_872335	6
chr2	136131728	136140296	8569	*	4	2766	15693.1	FALSE	chr2	136114349	136118149	3801	-	136114869	136118060	7852	7852	CXCR4	NM_001008540 NM_001348056 NM_001348059 NM_001348060 NM_003467 NP_001008540 NP_001334985 NP_001334988 NP_001334989 NP_003458	3
chr5	96870326	96897181	26856	*	5	4101	15664.5	FALSE	chr5	96875986	96919703	43718	+	96879686	96917605	64167	64167	ERAP2	NM_001130140 NM_001329229 NM_001329233 NM_022350 NP_001123612 NP_001316158 NP_001316162 NP_071745 NR_137637 XM_011543544 XP_011541846 XR_001742179	22
chr5	96870326	96897181	26856	*	5	4101	15664.5	FALSE	chr5	96935394	97037513	102120	+	96936156	97028533	4012	4012	LNPEP	NM_005575 NM_175920 NP_005566 NP_787116 XM_024446045 XP_024301813	20
chr9	98034666	98057718	23053	*	4	3032	15620	FALSE	chr9	98056732	98083077	26346	+	98056809	98083055	54187	54187	NANS	NM_018946 NP_061819 XM_011518787 XM_011518788 XM_017014811 XM_024447574 XP_011517089 XP_011517090 XP_016870300 XP_024303342	6
chr15	72116954	72118855	1902	*	1	1902	15618.8	FALSE	chr15	72114258	72143692	29435	+	72139624	72140262	123228	123228	SENP8	NM_001166340 NM_001172109 NM_001172110 NM_001172111 NM_145204 NP_001159812 NP_001165580 NP_001165581 NP_001165582 NP_660205 XM_005254157 XM_011521217 XP_005254214 XP_011519519	5
chr15	72116954	72118855	1902	*	1	1902	15618.8	FALSE	chr15	71822291	72118577	296287	-	71826580	72046563	4649	4649	MYO9A	NM_006901 NP_008832 XM_006720539 XM_011521613 XM_011521614 XM_011521615 XM_011521616 XM_011521617 XM_011521618 XM_011521619 XM_011521620 XM_011521621 XM_011521622 XM_011521623 XM_017022229 XM_017022230 XP_006720602 XP_011519915 XP_011519916 XP_011519917 XP_011519918 XP_011519919 XP_011519920 XP_011519921 XP_011519922 XP_011519923 XP_011519924 XP_011519925 XP_016877718 XP_016877719	48
chr7	116499087	116527617	28531	*	5	5654	15608.8	FALSE	chr7	116524994	116561179	36186	+	116525063	116559287	857	857	CAV1	NM_001172895 NM_001172896 NM_001172897 NM_001753 NP_001166366 NP_001166367 NP_001166368 NP_001744	4
chr11	35105443	35144417	38975	*	6	4739	15601.3	FALSE	chr11	35138882	35232402	93521	+	35139304	35229333	960	960	CD44	NM_000610 NM_001001389 NM_001001390 NM_001001391 NM_001001392 NM_001202555 NM_001202556 NM_001202557 NP_000601 NP_001001389 NP_001001390 NP_001001391 NP_001001392 NP_001189484 NP_001189485 NP_001189486 XM_005253231 XM_005253232 XM_005253235 XM_005253238 XM_005253239 XM_005253240 XM_006718388 XM_006718390 XM_011520482 XM_011520483 XM_011520484 XM_011520485 XM_011520486 XM_011520487 XM_011520488 XM…	20
chr5	139262793	139316743	53951	*	9	5359	15596.9	FALSE	chr5	139273752	139331677	57926	+	139293981	139329395	9782	9782	MATR3	NM_001194954 NM_001194955 NM_001194956 NM_001282278 NM_001400441 NM_001400442 NM_001400443 NM_001400444 NM_001400445 NM_001400447 NM_001400448 NM_001400450 NM_001400451 NM_001400452 NM_001400453 NM_001400454 NM_001400455 NM_001400456 NM_001400457 NM_001400458 NM_001400459 NM_001400460 NM_001400461 NM_001400462 NM_001400463 NM_001400464 NM_001400465 NM_001400466 NM_001400467 NM_018834 NM_199189 NP…	23
chr5	139262793	139316743	53951	*	9	5359	15596.9	FALSE	chr5	139273789	139316148	42360	+	139315737	139316148	724102	724102	SNHG4	NR_003141 NR_036536	11
chr5	139262793	139316743	53951	*	9	5359	15596.9	FALSE	chr5	138946724	139293534	346811	-	138947117	139137342	64374	64374	SIL1	NM_001037633 NM_022464 NP_001032722 NP_071909 XM_011543570 XM_024446164 XP_011541872 XP_024301932	23
chr5	139262793	139316743	53951	*	9	5359	15596.9	FALSE	chr5	139341587	139369720	28134	+	139363785	139368798	51247	51247	PAIP2	NM_001033112 NM_016480 NP_001028284 NP_057564 NR_109830 XM_011543428 XM_017009522 XM_017009523 XP_011541730 XP_016865011 XP_016865012	5
chr10	5888597	5906704	18108	*	4	4564	15586.5	FALSE	chr10	5765223	5842132	76910	-	5766006	5813258	2665	2665	GDI2	NM_001115156 NM_001494 NP_001108628 NP_001485 XM_017016071 XP_016871560	14
chr10	5888597	5906704	18108	*	4	4564	15586.5	FALSE	chr10	5890203	5937594	47392	+	5890346	5937280	84893	84893	FBH1	NM_001258452 NM_001258453 NM_032807 NM_178150 NP_001245381 NP_001245382 NP_116196 NP_835363 XM_011519748 XM_017016842 XM_017016843 XM_017016844 XM_017016845 XM_017016846 XM_024448240 XM_024448241 XP_011518050 XP_016872331 XP_016872332 XP_016872333 XP_016872334 XP_016872335 XP_024304008 XP_024304009 XR_001747242 XR_001747243 XR_001747244 XR_002957026 XR_002957028	27
chr10	5888597	5906704	18108	*	4	4564	15586.5	FALSE	chr10	5861616	5889906	28291	-	5878130	5889354	54522	54522	ANKRD16	NM_001009941 NM_001009942 NM_001009943 NM_019046 NP_001009941 NP_001009943 NP_061919	8
chr11	68825762	68844104	18343	*	4	3356	15550.3	FALSE	chr11	68754620	68844410	89791	-	68754816	68815474	1374	1374	CPT1A	NM_001031847 NM_001876 NP_001027017 NP_001867 XM_005273762 XM_005273763 XM_017017220 XP_005273819 XP_005273820 XP_016872709	25
chr3	129278526	129283626	5101	*	2	2875	15546.8	FALSE	chr3	129278828	129306186	27359	+	129279733	129304825	56941	56941	HMCES	NM_001006109 NM_001363881 NM_001370343 NM_001370344 NM_001370345 NM_020187 NP_001006109 NP_001350810 NP_001357272 NP_001357273 NP_001357274 NP_064572	8
chr14	22555780	22570494	14715	*	5	3739	15543.9	FALSE	chr14	22598290	22612963	14674	+	22598307	22610948	63874	63874	ABHD4	NM_001392009 NM_022060 NP_001378938 NP_071343 NR_171624 NR_171625 NR_171626 XR_001750499	8
chr5	32531004	32584118	53115	*	6	4375	15498.9	FALSE	chr5	32531633	32604079	72447	+	32588513	32601084	10923	10923	SUB1	NM_006713 NP_006704 XM_011513944 XM_017008986 XM_017008987 XP_011512246 XP_016864475 XP_016864476	10
chr11	66834061	66869696	35636	*	4	4239	15487	FALSE	chr11	66842835	66846552	3718	+	66843456	66846095	9986	9986	RCE1	NM_001032279 NM_005133 NP_001027450 NP_005124	5
chr11	66834061	66869696	35636	*	4	4239	15487	FALSE	chr11	66856647	66860475	3829	+	66857745	66860371	78999	78999	LRFN4	NM_001363524 NM_024036 NP_001350453 NP_076941	3
chr11	83132934	83174319	41386	*	6	4684	15478	FALSE	chr11	83156988	83187451	30464	+	83157440	83184894	51585	51585	PCF11	NM_001346413 NM_001346414 NM_001346415 NM_015885 NP_001333342 NP_001333343 NP_001333344 NP_056969 XR_001747905 XR_001747906	17
chr11	83132934	83174319	41386	*	6	4684	15478	FALSE	chr11	83193712	83260694	66983	+	83194671	83255934	338699	338699	ANKRD42	NM_001300972 NM_001300973 NM_001300975 NM_001300976 NM_001300977 NM_182603 NP_001287901 NP_001287902 NP_001287904 NP_001287905 NP_001287906 NP_872409 NR_125355	14
chr22	41780723	41801162	20440	*	4	4155	15431.4	FALSE	chr22	41800679	41832164	31486	+	41808891	41825823	79879	79879	CCDC134	NM_001304797 NM_001382346 NM_024821 NP_001291726 NP_001369275 NP_079097	7
chr22	41780723	41801162	20440	*	4	4155	15431.4	FALSE	chr22	41833079	41907307	74229	+	41833271	41905660	6721	6721	SREBF2	NM_004599 NP_004590 NR_103834 XM_006724310 XM_011530347 XM_017028921 XM_017028922 XP_006724373 XP_011528649 XP_016884410 XP_016884411 XR_001755276 XR_001755277 XR_001755278	24
chr11	65132100	65135549	3450	*	2	2695	15422.5	FALSE	chr11	65066300	65084164	17865	-	65066326	65083978	113130	113130	CDCA5	NM_080668 NP_542399 XM_005273733 XM_005273734 XM_011544743 XM_011544747 XM_011544748 XM_011544749 XM_017017158 XP_005273790 XP_005273791 XP_011543045 XP_011543049 XP_011543050 XP_011543051 XP_016872647 XR_001747757 XR_001747758	9
chr11	65132100	65135549	3450	*	2	2695	15422.5	FALSE	chr11	65088372	65089375	1004	-	65088375	65089031	100130348	100130348	TMEM262	NM_001242631 NM_001282448 NP_001229560 NP_001269377	3
chr11	65132100	65135549	3450	*	2	2695	15422.5	FALSE	chr11	65116403	65117701	1299	-	65116442	65117653	741	741	ZNHIT2	NM_014205 NP_055020	1
chr11	65132100	65135549	3450	*	2	2695	15422.5	FALSE	chr11	65120630	65122177	1548	-	65120681	65121813	2197	2197	FAU	NM_001997 NP_001988	2
chr11	65132100	65135549	3450	*	2	2695	15422.5	FALSE	chr11	65170154	65173244	3091	+	65170236	65173217	387778	387778	SPDYC	NM_001008778 NP_001008778 XM_017017705 XM_017017706 XM_017017707 XM_017017708 XM_017017709 XM_017017710 XP_016873194 XP_016873195 XP_016873196 XP_016873197 XP_016873198 XP_016873199	7
chr11	65132100	65135549	3450	*	2	2695	15422.5	FALSE	chr11	65121780	65134532	12753	-	65128382	65133601	84447	84447	SYVN1	NM_032431 NM_172230 NP_115807 NP_757385 XM_011545303 XP_011543605	13
chr11	65132100	65135549	3450	*	2	2695	15422.5	FALSE	chr11	65180566	65212006	31441	+	65182702	65211286	823	823	CAPN1	NM_001198868 NM_001198869 NM_005186 NP_001185797 NP_001185798 NP_005177 NR_040008 XM_006718698 XM_011545292 XP_006718761 XP_011543594	24
chr5	176535408	176550875	15468	*	5	4807	15416	FALSE	chr5	176542511	176595974	53464	+	176565353	176595672	54825	54825	CDHR2	NM_001171976 NM_017675 NP_001165447 NP_060145	34
chr5	176535408	176550875	15468	*	5	4807	15416	FALSE	chr5	176526712	176538025	11314	-	176529028	176532472	22838	22838	RNF44	NM_014901 NP_055716 XM_005265840 XM_005265841 XM_005265842 XM_005265843 XM_005265844 XM_005265845 XM_006714831 XM_006714832 XM_011534466 XM_011534467 XM_024446002 XP_005265897 XP_005265898 XP_005265899 XP_005265900 XP_005265901 XP_005265902 XP_006714894 XP_006714895 XP_011532768 XP_011532769 XP_024301770 XR_941091	9
chr1	206506966	206612751	105786	*	7	5999	15407.8	FALSE	chr1	206507531	206589448	81918	+	206507603	206586978	83593	83593	RASSF5	NM_031437 NM_182663 NM_182664 NM_182665 NP_872604 NP_872605 NP_872606	6
chr1	206506966	206612751	105786	*	7	5999	15407.8	FALSE	chr1	206635536	206684419	48884	+	206635704	206648965	8444	8444	DYRK3	NM_001004023 NM_003582 NP_001004023 NP_003573 XM_005273315 XM_011510061 XP_005273372 XP_011508363	6
chr1	206506966	206612751	105786	*	7	5999	15407.8	FALSE	chr1	206571292	206612465	41174	-	206581112	206612342	1939	1939	EIF2D	NM_001201478 NM_006893 NP_001188407 NP_008824 XM_005277509 XM_006711196 XM_011509257 XM_011509258 XM_017000530 XM_017000531 XM_017000532 XP_005277566 XP_006711259 XP_011507559 XP_011507560 XP_016856019 XP_016856020 XP_016856021 XR_001737023 XR_921751	17
chr7	102514385	102524341	9957	*	4	3874	15401.1	FALSE	chr7	102456238	102464863	8626	-	102457394	102464836	54784	54784	ALKBH4	NM_017621 NP_060091 XM_005250464 XM_005250465 XP_005250521 XP_005250522	3
chr7	102514385	102524341	9957	*	4	3874	15401.1	FALSE	chr7	102473128	102478922	5795	-	102473649	102478860	5439	5439	POLR2J	NM_001371100 NM_001393919 NM_006234 NP_001358029 NP_001380848 NP_006225 NR_163857 XM_017012353 XP_016867842	4
chr7	102514385	102524341	9957	*	4	3874	15401.1	FALSE	chr7	102551221	102563538	12318	+	102553256	102561175	441273	441273	SPDYE2	NM_001031618 NM_001396242 NP_001026789 NP_001383171 XM_011516237 XP_011514539	9
chr7	102514385	102524341	9957	*	4	3874	15401.1	FALSE	chr7	102479976	102517777	37802	-	102483592	102517710	100271927	100271927	RASA4B	NM_001277335 NM_001367767 NP_001264264 NP_001354696 XM_011515690 XM_017011626 XM_017011627 XP_011513992 XP_016867115 XP_016867116 XR_001744499 XR_001744500 XR_428162 XR_428163 XR_927316	22
chr20	58970318	59043367	73050	*	6	8106	15393.9	FALSE	chr20	58981208	58995133	13926	+	58981256	58994676	51497	51497	NELFCD	NM_016397 NM_198976 NP_945327 XR_244142	8
chr20	58970318	59043367	73050	*	6	8106	15393.9	FALSE	chr20	59019429	59026654	7226	+	59019523	59024783	81027	81027	TUBB1	NM_030773 NP_110400 XM_017028085 XP_016883574	4
chr20	58970318	59043367	73050	*	6	8106	15393.9	FALSE	chr20	58985686	59008238	22553	-	58991373	59008222	1522	1522	CTSZ	NM_001336 NP_001327	5
chr20	58970318	59043367	73050	*	6	8106	15393.9	FALSE	chr20	59025475	59032345	6871	-	59030306	59032251	514	514	ATP5F1E	NM_006886 NP_008817	2
chr20	58970318	59043367	73050	*	6	8106	15393.9	FALSE	chr20	59033145	59042805	9661	-	59035007	59042730	51012	51012	PRELID3B	NM_001256403 NM_016045 NP_001243332 NP_057129	6
chr19	47110898	47114056	3159	*	2	2661	15382	FALSE	chr19	47113274	47210636	97363	+	47130931	47209325	10055	10055	SAE1	NM_001145713 NM_001145714 NM_005500 NP_001139185 NP_001139186 NP_005491 NR_027280	18
chr19	47110898	47114056	3159	*	2	2661	15382	FALSE	chr19	47064187	47113776	49590	-	47066356	47112584	23211	23211	ZC3H4	NM_015168 NP_055983 XM_005258676 XM_005258677 XM_005258678 XM_006723113 XM_011526668 XM_011526669 XM_011526670 XM_017026529 XM_017026530 XM_017026531 XP_005258733 XP_005258734 XP_005258735 XP_006723176 XP_011524970 XP_011524971 XP_011524972 XP_016882018 XP_016882019 XP_016882020	17
chr3	39075482	39126995	51514	*	7	3910	15304.5	FALSE	chr3	38845764	39052157	206394	-	38846694	38950362	11280	11280	SCN11A	NM_001287223 NM_001349253 NM_014139 NP_001336182 NP_054858 NR_164473 XM_011533321 XM_017005647 XM_017005648 XM_017005650 XM_017005651 XM_017005652 XM_017005653 XP_011531623 XP_016861136 XP_016861137 XP_016861139 XP_016861140 XP_016861141 XP_016861142	40
chr3	39075482	39126995	51514	*	7	3910	15304.5	FALSE	chr3	39107680	39138903	31224	+	39107838	39138788	199223	199223	TTC21A	NM_001105513 NM_001366899 NM_001366900 NM_145755 NP_001098983 NP_001353828 NP_001353829 NP_665698 NR_159494 NR_159495 NR_159496 XM_005264921 XM_005264922 XM_005264924 XM_005264925 XM_005264926 XM_005264927 XM_006713011 XM_011533447 XM_011533449 XM_017005843 XM_024453382 XP_005264978 XP_005264979 XP_005264981 XP_005264982 XP_005264983 XP_005264984 XP_006713074 XP_011531749 XP_011531751 XP_01686133…	28
chr3	39075482	39126995	51514	*	7	3910	15304.5	FALSE	chr3	39096599	39107863	11265	-	39098236	39107541	64689	64689	GORASP1	NM_001278789 NM_001278790 NM_031899 NP_001265718 NP_001265719 NP_114105 NR_103866 NR_103867 XM_006713301 XM_011534020 XM_011534021 XM_017007050 XM_017007051 XM_017007052 XM_024453714 XP_006713364 XP_011532322 XP_011532323 XP_016862539 XP_016862540 XP_016862541 XP_024309482 XR_001740235 XR_002959569 XR_002959570 XR_002959571 XR_002959572 XR_002959573 XR_940493 XR_940494	8
chr6	35297532	35312944	15413	*	3	3079	15291.8	FALSE	chr6	35297818	35321771	23954	+	35297857	35321410	50619	50619	DEF6	NM_022047 NP_071330	11
chr6	35297532	35312944	15413	*	3	3079	15291.8	FALSE	chr6	35342558	35428191	85634	+	35347138	35426079	5467	5467	PPARD	NM_001171818 NM_001171819 NM_001171820 NM_006238 NM_177435 NP_001165289 NP_001165290 NP_001165291 NP_006229 NP_803184 XM_005249193 XM_006715120 XM_006715123 XM_011514707 XM_011514710 XM_017010972 XM_017010973 XM_017010974 XM_024446474 XP_005249250 XP_006715183 XP_006715186 XP_011513009 XP_011513012 XP_016866461 XP_016866462 XP_016866463 XP_024302242	9
chr17	45291576	45317479	25904	*	6	3610	15288	FALSE	chr17	45254393	45262094	7702	-	45254426	45262016	124783	124783	SPATA32	NM_152343 NP_689556	7
chr17	45291576	45317479	25904	*	6	3610	15288	FALSE	chr17	45263119	45317029	53911	-	45264636	45290745	9020	9020	MAP3K14	NM_003954 NP_003945 XM_011525441 XP_011523743 XR_934591	16
chr15	99555926	99578957	23032	*	4	3034	15285.7	FALSE	chr15	99565417	99716488	151072	+	99633120	99712771	4205	4205	MEF2A	NM_001130926 NM_001130927 NM_001130928 NM_001171894 NM_001319206 NM_001352614 NM_001352615 NM_001352616 NM_001352617 NM_001352618 NM_001365201 NM_001365202 NM_001365203 NM_001365204 NM_001365205 NM_001365206 NM_001365207 NM_001365208 NM_001365209 NM_001365210 NM_001365211 NM_001393558 NM_001393559 NM_001393560 NM_001393561 NM_001400028 NM_001400029 NM_001400030 NM_001400031 NM_001400032 NM_001400…	17
chr3	150598564	150604082	5519	*	2	1831	15281	FALSE	chr3	150602875	150630436	27562	+	150603363	150627134	51714	51714	SELENOT	NM_016275 NP_057359	8
chr3	150598564	150604082	5519	*	2	1831	15281	FALSE	chr3	150541998	150603174	61177	-	150544415	150546135	27230	27230	SERP1	NM_014445 NP_055260	4
chr17	2392828	2402114	9287	*	3	4094	15250.4	FALSE	chr17	2384073	2401104	17032	-	2386901	2400712	4335	4335	MNT	NM_020310 NP_064706 XM_011523868 XM_011523869 XM_017024654 XM_024450758 XM_024450759 XP_011522170 XP_011522171 XP_016880143 XP_024306526 XP_024306527	11
chr11	75800411	75836626	36216	*	7	4475	15250.1	FALSE	chr11	75815210	76144232	329023	+	75815408	76141413	7405	7405	UVRAG	NM_001386671 NM_001386672 NM_001386673 NM_001386674 NM_003369 NP_001373600 NP_001373601 NP_001373602 NP_001373603 NP_003360 NR_170160 NR_170161 XM_017018226 XM_017018227 XP_016873715 XP_016873716 XR_001747949 XR_001747950	23
chr1	204493755	204531460	37706	*	5	5815	15244.1	FALSE	chr1	204516379	204558120	41742	+	204525519	204549682	4194	4194	MDM4	NM_001204171 NM_001204172 NM_001278516 NM_001278517 NM_001278518 NM_001278519 NM_002393 NP_001191100 NP_001191101 NP_001265445 NP_001265446 NP_001265447 NP_001265448 NP_002384 XM_017001311 XM_017001312 XM_017001313 XM_024447114 XM_024447115 XP_016856800 XP_016856801 XP_016856802 XP_024302882 XP_024302883 XR_001737179 XR_001737180 XR_001737181 XR_001737182 XR_001737183 XR_002956626	13
chr1	204493755	204531460	37706	*	5	5815	15244.1	FALSE	chr1	204422628	204494805	72178	-	204424852	204469802	5287	5287	PIK3C2B	NM_001377334 NM_001377335 NM_002646 NP_001364263 NP_001364264 NP_002637	36
chr12	94147975	94174711	26737	*	6	5551	15228.8	FALSE	chr12	94148577	94307675	159099	+	94148972	94305285	10154	10154	PLXNC1	NM_005761 NP_005752 NR_037687 XM_006719186 XM_011537730 XM_011537731 XM_017018671 XM_017018672 XP_006719249 XP_011536032 XP_011536033 XP_016874160 XP_016874161	35
chr10	43395820	43421221	25402	*	5	3809	15215.2	FALSE	chr10	43436841	43483181	46341	+	43475814	43481922	642819	642819	ZNF487	NM_001355444 NM_001355445 NM_001355446 NM_001355447 NM_001355448 NM_001355449 NM_001355450 NP_001342373 NP_001342374 NP_001342375 NP_001342376 NP_001342377 NP_001342378 NP_001342379 XM_024448129 XM_024448131 XM_024448132 XM_024448133 XP_024303897 XP_024303899 XP_024303900 XP_024303901	5
chr10	43395820	43421221	25402	*	5	3809	15215.2	FALSE	chr10	43385617	43409186	23570	-	43386637	43387884	3185	3185	HNRNPF	NM_001098204 NM_001098205 NM_001098206 NM_001098207 NM_001098208 NM_004966 NP_001091674 NP_001091675 NP_001091676 NP_001091677 NP_001091678 NP_004957	7
chr2	60521615	60555909	34295	*	8	4895	15185.4	FALSE	chr2	60450520	60554467	103948	-	60452565	60553270	53335	53335	BCL11A	NM_001363864 NM_001365609 NM_018014 NM_022893 NM_138553 NM_138559 NP_001350793 NP_001352538 NP_060484 NP_075044 NP_612569 XM_011532909 XM_011532910 XM_017004333 XM_017004335 XM_017004336 XM_024452962 XM_024452963 XP_011531211 XP_011531212 XP_016859822 XP_016859824 XP_016859825 XP_024308730 XP_024308731	16
chr2	113157161	113182712	25552	*	6	5173	15172.2	FALSE	chr2	113157325	113209396	52072	+	113182457	113201415	23550	23550	PSD4	NM_012455 NP_036587 XM_005263634 XM_006712392 XM_006712393 XM_006712394 XP_005263691 XP_006712455 XP_006712456 XP_006712457	15
chr2	241302500	241336870	34371	*	4	4870	15146.9	FALSE	chr2	241315100	241354027	38928	+	241316468	241350174	4735	4735	SEPTIN2	NM_001008491 NM_001008492 NM_001282972 NM_001282973 NM_001321029 NM_001321030 NM_001321031 NM_001321032 NM_001321033 NM_001321034 NM_001321035 NM_001349287 NM_001349288 NM_001349289 NM_001349290 NM_001349291 NM_001349302 NM_001349304 NM_001349305 NM_001349306 NM_001349307 NM_001349308 NM_001349309 NM_001349310 NM_001349311 NM_001349312 NM_001349313 NM_001349314 NM_001349315 NM_004404 NM_006155 NP…	19
chr2	241302500	241336870	34371	*	4	4870	15146.9	FALSE	chr2	241356285	241494841	138557	+	241373108	241494125	9855	9855	FARP2	NM_001282983 NM_001282984 NM_014808 NP_001269912 NP_001269913 NP_055623 XM_005247050 XM_011512233 XM_011512234 XM_011512235 XM_011512236 XM_017005417 XM_017005419 XM_017005420 XM_024453259 XP_005247107 XP_011510535 XP_011510536 XP_011510537 XP_011510538 XP_016860906 XP_016860908 XP_016860909 XP_024309027	35
chr2	241302500	241336870	34371	*	4	4870	15146.9	FALSE	chr2	241227264	241317061	89798	-	241229601	241267648	3069	3069	HDLBP	NM_001243900 NM_001320965 NM_001320966 NM_001320967 NM_005336 NM_203346 NP_001230829 NP_001307894 NP_001307895 NP_001307896 NP_005327 NP_976221 XM_005247002 XM_006712475 XM_011511058 XM_011511060 XM_017003940 XM_017003941 XM_017003942 XM_024452832 XM_024452833 XP_005247059 XP_006712538 XP_011509360 XP_011509362 XP_016859429 XP_016859430 XP_016859431 XP_024308600 XP_024308601	36
chr15	64089477	64096526	7050	*	3	2629	15144.8	FALSE	chr15	64094123	64146090	51968	+	64096014	64145703	6642	6642	SNX1	NM_001242933 NM_003099 NM_148955 NM_152826 NP_001229862 NP_003090 NP_683758 XM_005254611 XP_005254668 XR_001751380 XR_001751381	19
chr15	64089477	64096526	7050	*	3	2629	15144.8	FALSE	chr15	63907036	64072033	164998	-	63908520	64040261	23604	23604	DAPK2	NM_001363730 NM_001384997 NM_001384998 NM_001384999 NM_001385000 NM_001395279 NM_001395281 NM_001395282 NM_001395283 NM_001395284 NM_001395285 NM_001395286 NM_001395287 NM_001395288 NM_001395289 NM_001395290 NM_001395291 NM_001395292 NM_001395293 NM_014326 NP_001350659 NP_001371926 NP_001371927 NP_001371928 NP_001371929 NP_001382208 NP_001382210 NP_001382211 NP_001382212 NP_001382213 NP_001382214…	20
chr15	64089477	64096526	7050	*	3	2629	15144.8	FALSE	chr15	64072565	64093857	21293	-	64072931	64093768	84191	84191	CIAO2A	NM_001014812 NM_001289108 NM_032231 NP_001014812 NP_001276037 NP_115607 NR_110310	7
chr4	143335720	143359846	24127	*	4	3855	15140.6	FALSE	chr4	143336762	143474568	137807	+	143337189	143469212	2549	2549	GAB1	NM_002039 NM_207123 NP_002030 NP_997006 XM_006714167 XM_006714168 XM_017007966 XM_017007967 XM_017007968 XM_017007969 XM_017007970 XM_017007971 XP_006714230 XP_006714231 XP_016863455 XP_016863456 XP_016863457 XP_016863458 XP_016863459 XP_016863460	19
chr19	41263015	41265000	1986	*	1	1986	15131.9	FALSE	chr19	41262496	41307787	45292	+	41264504	41306565	11100	11100	HNRNPUL1	NM_001301016 NM_001321208 NM_001321211 NM_007040 NM_144732 NM_144733 NM_144734 NP_001287945 NP_001308137 NP_001308140 NP_008971 NP_653333 XM_005258459 XM_005258461 XM_005258463 XM_005258464 XM_005258465 XM_011526392 XM_011526393 XM_011526394 XM_011526395 XP_005258516 XP_005258518 XP_005258520 XP_005258521 XP_005258522 XP_011524694 XP_011524695 XP_011524696 XP_011524697	21
chr19	41263015	41265000	1986	*	1	1986	15131.9	FALSE	chr19	41310172	41324873	14702	+	41310311	41322715	90324	90324	CCDC97	NM_001346100 NM_052848 NP_001333029 NP_443080 XM_017027442 XP_016882931	6
chr14	22918352	22929745	11394	*	2	2684	15127.6	FALSE	chr14	22893204	22919182	25979	-	22901730	22911393	55147	55147	RBM23	NM_001077351 NM_001077352 NM_001308044 NM_001352762 NM_001352763 NM_001352764 NM_001352765 NM_001352766 NM_018107 NP_001070819 NP_001070820 NP_001294973 NP_001339691 NP_001339692 NP_001339693 NP_001339694 NP_001339695 NP_060577 XM_011536892 XM_011536893 XM_011536894 XM_011536895 XM_011536896 XM_011536897 XM_011536900 XM_011536902 XM_011536903 XM_011536904 XM_011536905 XM_011536906 XM_017021398 XM…	18
chr14	22918352	22929745	11394	*	2	2684	15127.6	FALSE	chr14	22920525	22929408	8884	-	22920681	22929361	10419	10419	PRMT5	NM_001039619 NM_001282953 NM_001282954 NM_001282955 NM_001282956 NM_006109 NP_001034708 NP_001269882 NP_001269883 NP_001269884 NP_001269885 NP_006100 XR_001750113 XR_429287	16
chr7	140209921	140239691	29771	*	6	5043	15108.3	FALSE	chr7	140084746	140176983	92238	-	140091094	140176937	80853	80853	KDM7A	NM_030647 NP_085150 XM_011516587 XP_011514889	21
chr6	139306859	139345165	38307	*	8	4135	15104.1	FALSE	chr6	139144204	139291998	147795	-	139242526	139288899	167838	167838	TXLNB	NM_153235 NP_694967 XM_005266836 XM_011535505 XM_011535506 XM_017010322 XM_024446341 XP_005266893 XP_011533807 XP_011533808 XP_016865811 XP_024302109 XR_942317	32
chr12	96374836	96421411	46576	*	6	4806	15090.3	FALSE	chr12	96278261	96400480	122220	-	96280242	96335062	5128	5128	CDK17	NM_001170464 NM_002595 NP_001163935 NP_002586 XM_017019405 XM_017019406 XM_017019407 XP_016874894 XP_016874895 XP_016874896	21
chr7	39949039	39952001	2963	*	1	2963	15089.6	FALSE	chr7	39950121	40099580	149460	+	39950642	40094980	8621	8621	CDK13	NM_003718 NM_031267 NP_003709 NP_112557 XM_011515597 XM_017012750 XM_017012751 XP_011513899 XP_016868239 XP_016868240	22
chr12	111753361	111776448	23088	*	6	5099	15066.6	FALSE	chr12	111753890	111817532	63643	+	111753890	111809575	217	217	ALDH2	NM_000690 NM_001204889 NP_000681 NP_001191818	16
chr15	44662583	44667189	4607	*	2	2162	15061.2	FALSE	chr15	44554818	44663688	108871	-	44555182	44663647	80208	80208	SPG11	NM_001160227 NM_025137 NP_001153699 NP_079413 XM_006720700 XM_006720701 XM_017022634 XM_017022635 XM_017022636 XP_006720763 XP_006720764 XP_016878123 XP_016878124 XP_016878125 XR_001751402 XR_931917	45
chr1	1889917	1919973	30057	*	7	5221	15061.1	FALSE	chr1	1915108	1917296	2189	+	1915281	1917193	163688	163688	CALML6	NM_001330313 NM_138705 NP_001317242 NP_619650 XM_005244729 XP_005244786	3
chr1	1889917	1919973	30057	*	7	5221	15061.1	FALSE	chr1	1785285	1891117	105833	-	1787331	1825453	2782	2782	GNB1	NM_001282538 NM_001282539 NM_002074 NP_001269467 NP_001269468 NP_002065 XM_017001059 XM_017001060 XM_017001061 XM_024446495 XP_016856548 XP_016856549 XP_016856550 XP_024302263	15
chr1	1889917	1919973	30057	*	7	5221	15061.1	FALSE	chr1	1917590	1919279	1690	-	1917882	1919265	339456	339456	TMEM52	NM_178545 NP_848640	2
chr7	92809446	92834237	24792	*	5	4126	15053.1	FALSE	chr7	92604921	92836573	231653	-	92615140	92833323	1021	1021	CDK6	NM_001145306 NM_001259 NP_001138778 NP_001250 XM_006715835 XP_006715898	10
chr1	162560803	162595940	35138	*	4	4216	15043.4	FALSE	chr1	162561506	162599842	38337	+	162566069	162599363	6675	6675	UAP1	NM_001324113 NM_001324114 NM_001324115 NM_001324116 NM_001324117 NM_001388401 NM_001388402 NM_001399790 NM_001399791 NM_001399792 NM_001399793 NM_003115 NP_001311042 NP_001311043 NP_001311044 NP_001311045 NP_001311046 NP_001375330 NP_001375331 NP_001386719 NP_001386720 NP_001386721 NP_001386722 NP_003106 NR_174352	12
chr1	162560803	162595940	35138	*	4	4216	15043.4	FALSE	chr1	162631373	162787405	156033	+	162719064	162780246	4921	4921	DDR2	NM_001014796 NM_001354982 NM_001354983 NM_006182 NP_001014796 NP_001341911 NP_001341912 NP_006173 XM_011509587 XM_011509588 XP_011507889 XP_011507890	22
chr2	172546015	172558646	12632	*	3	2776	15042.3	FALSE	chr2	172555373	172608669	53297	+	172556151	172595969	5163	5163	PDK1	NM_001278549 NM_002610 NP_001265478 NP_002601 NR_103729 NR_103731 XM_006712594 XM_006712595 XM_011511343 XM_011511344 XM_011511345 XM_011511347 XP_006712657 XP_006712658 XP_011509645 XP_011509646 XP_011509647 XP_011509649 XR_001738771 XR_001738772 XR_001738773 XR_001738774 XR_001738775 XR_001738776 XR_427093 XR_427094 XR_427095 XR_922942 XR_922943 XR_922944 XR_922945	15
chr20	62642091	62659321	17231	*	5	3445	14983.2	FALSE	chr20	62642503	62685785	43283	+	62656455	62671893	28231	28231	SLCO4A1	NM_016354 NP_057438 XM_005260203 XM_011528792 XM_017027826 XM_017027827 XP_005260260 XP_011527094 XP_016883315 XP_016883316 XR_001754249 XR_001754250 XR_001754251 XR_001754252 XR_001754253 XR_001754254 XR_001754255 XR_001754256 XR_001754257 XR_001754258 XR_002958473 XR_002958474 XR_244115 XR_244116 XR_936524	14
chr20	62642091	62659321	17231	*	5	3445	14983.2	FALSE	chr20	62708836	62762771	53936	+	62709208	62760267	4923	4923	NTSR1	NM_002531 NP_002522 XM_011528827 XP_011527129	5
chr16	67520965	67548913	27949	*	4	3842	14980.1	FALSE	chr16	67562467	67639177	76711	+	67610833	67637872	10664	10664	CTCF	NM_001191022 NM_001363916 NM_006565 NP_001177951 NP_001350845 NP_006556 XM_005255775 XM_017022868 XP_005255832 XP_016878357	15
chr16	67520965	67548913	27949	*	4	3842	14980.1	FALSE	chr16	67482571	67483547	977	-	67482636	67483398	181	181	AGRP	NM_001138 NP_001129	4
chr16	67520965	67548913	27949	*	4	3842	14980.1	FALSE	chr16	67518418	67546788	28371	+	67529823	67546463	79567	79567	RIPOR1	NM_001193522 NM_001193523 NM_001193524 NM_024519 NP_001180451 NP_001180452 NP_001180453 NP_078795 XM_011523321 XM_011523322 XM_011523324 XM_011523325 XM_011523326 XM_017023663 XM_017023664 XM_024450442 XM_024450443 XP_011521623 XP_011521624 XP_011521626 XP_011521627 XP_011521628 XP_016879152 XP_016879153 XP_024306210 XP_024306211	24
chr16	67520965	67548913	27949	*	4	3842	14980.1	FALSE	chr16	67438014	67481181	43168	-	67438528	67481086	9114	9114	ATP6V0D1	NM_004691 NP_004682 XM_011523444 XM_011523445 XM_011523446 XP_011521746 XP_011521747 XP_011521748	10
chr2	96503559	96554726	51168	*	7	6510	14964.8	FALSE	chr2	96536743	96552634	15892	+	96536827	96552396	10865	10865	ARID5A	NM_001319085 NM_001319087 NM_001319092 NM_001319093 NM_001319094 NM_001319096 NM_006673 NM_212481 NP_001306014 NP_001306016 NP_001306021 NP_001306022 NP_001306023 NP_001306025 NP_997646 XM_011510499 XM_017003183 XM_017003184 XM_024452563 XM_024452564 XP_011508801 XP_016858672 XP_016858673 XP_024308331 XP_024308332	7
chr2	96503559	96554726	51168	*	7	6510	14964.8	FALSE	chr2	96497646	96508109	10464	-	96498244	96505286	93082	93082	NEURL3	NM_001080535 NM_001285485 NM_001285486 NP_001272414 NP_001272415 NR_026875 NR_104346 XM_011512178 XM_011512179 XP_011510480 XP_011510481	7
chr13	51803222	51845308	42087	*	5	3283	14948.9	FALSE	chr13	51861969	51866232	4264	+	51865412	51866080	83446	83446	CCDC70	NM_001346075 NM_031290 NP_001333004 NP_112580	2
chr13	51803222	51845308	42087	*	5	3283	14948.9	FALSE	chr13	51763951	51845159	81209	-	51768187	51838530	79758	79758	DHRS12	NM_001031719 NM_001270424 NM_001377533 NM_001377929 NM_001377930 NM_001377931 NM_001377932 NM_001377933 NM_024705 NP_001026889 NP_001257353 NP_001364462 NP_001364858 NP_001364859 NP_001364860 NP_001364861 NP_001364862 NP_078981 NR_165330 NR_165332 NR_165333	18
chr13	51803222	51845308	42087	*	5	3283	14948.9	FALSE	chr13	51813347	51845177	31831	-	51816751	51838530	283521	283521	TMEM272	NM_001351003 NM_001351005 NM_001351006 NM_178515 NP_001337932 NP_001337934 NP_001337935	5
chr22	49959802	49971230	11429	*	4	3608	14877	FALSE	chr22	49960768	49964072	3305	+	49960948	49963127	415116	415116	PIM3	NM_001001852 NP_001001852	5
chr22	49959802	49971230	11429	*	4	3608	14877	FALSE	chr22	49900229	49918438	18210	-	49903708	49913765	79087	79087	ALG12	NM_024105 NP_077010 XM_011530371 XM_017028936 XM_017028937 XP_011528673 XP_016884425 XP_016884426	10
chr1	36373704	36388100	14397	*	2	4062	14861	FALSE	chr1	36322030	36324154	2125	-	36322295	36323037	55194	55194	EVA1B	NM_001304762 NM_018166 NP_001291691 NP_060636 NR_130899	4
chr1	36373704	36388100	14397	*	2	4062	14861	FALSE	chr1	36339624	36385924	46301	-	36341755	36361332	83931	83931	STK40	NM_001282546 NM_001282547 NM_032017 NP_001269475 NP_001269476 NP_114406	14
chr14	104794181	104827932	33752	*	6	4450	14833.6	FALSE	chr14	104800596	104804712	4117	+	104801198	104802466	100128927	100128927	ZBTB42	NM_001137601 NM_001370342 NP_001131073 NP_001357271	2
chr14	104794181	104827932	33752	*	6	4450	14833.6	FALSE	chr14	104769349	104795751	26403	-	104769586	104792643	207	207	AKT1	NM_001014431 NM_001014432 NM_001382430 NM_001382431 NM_001382432 NM_001382433 NM_005163 NP_001014431 NP_001014432 NP_001369359 NP_001369360 NP_001369361 NP_001369362 NP_005154 XR_002957536	10
chr14	104794181	104827932	33752	*	6	4450	14833.6	FALSE	chr14	104865268	104896747	31480	+	104868451	104894958	283638	283638	CEP170B	NM_001112726 NM_015005 NP_001106197 NP_055820 XM_005267550 XM_011536665 XM_011536666 XM_011536667 XM_017021227 XM_017021228 XM_017021229 XM_017021230 XP_005267607 XP_011534967 XP_011534968 XP_011534969 XP_016876716 XP_016876717 XP_016876718 XP_016876719	19
chr2	233059885	233087400	27516	*	6	4806	14827.8	FALSE	chr2	232878701	233013256	134556	-	232879489	232974890	25791	25791	NGEF	NM_001114090 NM_019850 NP_001107562 NP_062824 XM_011510923 XM_011510924 XM_011510925 XP_011509225 XP_011509226 XP_011509227	19
chr10	17200103	17230863	30761	*	5	5501	14823.2	FALSE	chr10	17228241	17237593	9353	+	17229423	17237271	7431	7431	VIM	NM_003380 NP_003371 XM_006717500 XP_006717563	9
chr10	17200103	17230863	30761	*	5	5501	14823.2	FALSE	chr10	17137336	17202054	64719	-	17149040	17201634	1787	1787	TRDMT1	NM_001321006 NM_001321007 NM_001351219 NM_001351220 NM_001351221 NM_001351222 NM_001351223 NM_004412 NM_176081 NM_176083 NM_176084 NM_176085 NM_176086 NP_001307935 NP_001307936 NP_001338148 NP_001338149 NP_001338150 NP_001338151 NP_001338152 NP_004403 XM_005252374 XM_005252375 XM_005252378 XM_011519343 XM_011519344 XM_011519345 XM_017015801 XM_017015802 XM_017015803 XM_017015804 XM_017015806 XM_0…	16
chr12	57058446	57095909	37464	*	6	4151	14812.9	FALSE	chr12	57010000	57028883	18884	-	57012379	57015797	6866	6866	TAC3	NM_001006667 NM_001178054 NM_013251 NP_001171525 NP_037383 NR_033654 NR_135164 NR_135165 NR_135166	11
chr12	57058446	57095909	37464	*	6	4151	14812.9	FALSE	chr12	57089043	57095476	6434	+	57089272	57094721	4665	4665	NAB2	NM_001330305 NM_005967 NP_001317234 NP_005958	7
chr12	57058446	57095909	37464	*	6	4151	14812.9	FALSE	chr12	57028517	57051198	22682	-	57028755	57048323	4640	4640	MYO1A	NM_001256041 NM_005379 NP_001242970 NP_005370 XM_011538373 XP_011536675	30
chr12	57058446	57095909	37464	*	6	4151	14812.9	FALSE	chr12	57128483	57213361	84879	+	57128965	57212555	4035	4035	LRP1	NM_002332 NP_002323	89
chr12	57058446	57095909	37464	*	6	4151	14812.9	FALSE	chr12	57055643	57088063	32421	-	57059879	57078745	23306	23306	NEMP1	NM_001130963 NM_015257 NP_001124435 NP_056072 XM_011538056 XM_011538057 XM_011538058 XM_011538059 XM_011538060 XM_017019078 XM_017019079 XM_024448900 XP_011536358 XP_011536359 XP_011536360 XP_011536361 XP_011536362 XP_016874567 XP_016874568 XP_024304668	10
chr7	106236573	106286379	49807	*	6	3782	14812.3	FALSE	chr7	106248298	106285966	37669	-	106251083	106284884	10135	10135	NAMPT	NM_005746 NM_182790 NP_005737	13
chr19	48872413	48892175	19763	*	5	4601	14805.7	FALSE	chr19	48872421	48876058	3638	+	48873234	48875973	23645	23645	PPP1R15A	NM_014330 NP_055145	3
chr19	48872413	48892175	19763	*	5	4601	14805.7	FALSE	chr19	48933699	48944969	11271	+	48933722	48944933	27294	27294	DHDH	NM_014475 NP_055290 XM_005258748 XM_017026598 XP_005258805 XP_016882087 XR_935796	7
chr19	48872413	48892175	19763	*	5	4601	14805.7	FALSE	chr19	48900312	48923372	23061	+	48900797	48922424	4924	4924	NUCB1	NM_006184 NP_006175 XM_017026845 XP_016882334	10
chr19	48872413	48892175	19763	*	5	4601	14805.7	FALSE	chr19	48813018	48836510	23493	-	48813175	48836411	51171	51171	HSD17B14	NM_016246 NP_057330 XM_005258969 XM_005258970 XP_005259026 XP_005259027 XR_243938	9
chr19	48872413	48892175	19763	*	5	4601	14805.7	FALSE	chr19	48837097	48868617	31521	-	48837289	48867620	57664	57664	PLEKHA4	NM_001161354 NM_020904 NP_001154826 NP_065955 XM_005259107 XM_006723301 XM_011527157 XM_011527158 XM_011527159 XM_011527160 XM_011527162 XM_017027037 XP_005259164 XP_006723364 XP_011525459 XP_011525460 XP_011525461 XP_011525462 XP_011525464 XP_016882526	21
chr2	162317826	162344774	26949	*	4	3787	14775.6	FALSE	chr2	162318840	162371595	52756	+	162319135	162371380	25801	25801	GCA	NM_001330265 NM_001330266 NM_001330267 NM_001330268 NM_001330270 NM_001330271 NM_012198 NP_001317194 NP_001317195 NP_001317196 NP_001317197 NP_001317199 NP_001317200 NP_036330 XM_005246446 XM_006712398 XM_006712400 XM_011510926 XM_011510928 XM_017003767 XM_017003769 XP_005246503 XP_006712461 XP_006712463 XP_011509228 XP_011509230 XP_016859256 XP_016859258	12
chr2	162317826	162344774	26949	*	4	3787	14775.6	FALSE	chr2	162267074	162318684	51611	-	162267200	162318307	64135	64135	IFIH1	NM_022168 NP_071451	16
chr11	68257541	68272687	15147	*	4	3321	14759.8	FALSE	chr11	68154863	68213828	58966	-	68157688	68190076	51111	51111	KMT5B	NM_001300907 NM_001300908 NM_001300909 NM_001363566 NM_001369424 NM_001369425 NM_001369426 NM_001369427 NM_001369428 NM_001369429 NM_001369430 NM_001369431 NM_001369432 NM_001369433 NM_016028 NM_017635 NP_001287836 NP_001287837 NP_001287838 NP_001350495 NP_001356353 NP_001356354 NP_001356355 NP_001356356 NP_001356357 NP_001356358 NP_001356359 NP_001356360 NP_001356361 NP_001356362 NP_057112 NP_06…	16
chr11	68257541	68272687	15147	*	4	3321	14759.8	FALSE	chr11	68312591	68449275	136685	+	68312715	68449070	4041	4041	LRP5	NM_001291902 NM_002335 NP_001278831 NP_002326 XM_005273994 XM_011545029 XM_011545030 XM_011545031 XM_017017735 XM_017017736 XP_005274051 XP_011543331 XP_011543332 XP_011543333 XP_016873224 XP_016873225 XR_001747874 XR_949925 XR_949926	27
chr11	68257541	68272687	15147	*	4	3321	14759.8	FALSE	chr11	68261338	68272001	10664	-	68261645	68263767	53838	53838	C11orf24	NM_001300913 NM_022338 NP_001287842 NP_071733 XM_005274053 XM_011545103 XP_005274110 XP_011543405	6
chr15	84631313	84658855	27543	*	5	3874	14748.7	FALSE	chr15	84639285	84654343	15059	-	84643470	84654274	84942	84942	WDR73	NM_032856 NP_116245 NR_130944 NR_130945 NR_130946 NR_130947 XR_001751407 XR_001751408 XR_243214	4
chr15	84631313	84658855	27543	*	5	3874	14748.7	FALSE	chr15	84655129	84658563	3435	-	84655270	84658152	4828	4828	NMB	NM_021077 NM_205858 NP_066563 NP_995580 XM_017022239 XP_016877728	3
chr1	26716780	26750777	33998	*	6	3285	14747.9	FALSE	chr1	26787054	26800659	13606	+	26790816	26797894	55650	55650	PIGV	NM_001202554 NM_001374478 NM_001374480 NM_001374481 NM_001374482 NM_001374483 NM_001374484 NM_001374485 NM_001374486 NM_017837 NP_001189483 NP_001361407 NP_001361409 NP_001361410 NP_001361411 NP_001361412 NP_001361413 NP_001361414 NP_001361415 NP_060307 NR_164651 NR_164652	5
chr10	21989445	22004510	15066	*	2	3215	14745.6	FALSE	chr10	21756548	22003769	247222	-	21756687	22003434	64215	64215	DNAJC1	NM_022365 NP_071760 XM_011519614 XM_017016536 XP_011517916 XP_016872025	13
chr10	12041563	12075232	33670	*	7	5846	14743.7	FALSE	chr10	12068954	12123221	54268	+	12069034	12120888	55526	55526	DHTKD1	NM_018706 NP_061176	17
chr10	12041563	12075232	33670	*	7	5846	14743.7	FALSE	chr10	11920022	12043170	123149	-	11921298	12035423	26019	26019	UPF2	NM_015542 NM_080599 NP_056357 NP_542166 XM_011519449 XP_011517751 XR_930489	23
chr11	78404040	78449788	45749	*	6	4569	14740	FALSE	chr11	78215293	78418348	203056	-	78219272	78417720	9846	9846	GAB2	NM_012296 NM_080491 NP_036428 NP_536739 XM_006718753 XM_011545408 XM_024448782 XP_006718816 XP_011543710 XP_024304550	15
chr5	134225242	134227071	1830	*	1	1830	14735.5	FALSE	chr5	134148935	134176964	28030	-	134157733	134174022	6500	6500	SKP1	NM_006930 NM_170679 NP_008861 NP_733779	8
chr5	134225242	134227071	1830	*	1	1830	14735.5	FALSE	chr5	134167170	134226073	58904	-	134167170	134225861	5515	5515	PPP2CA	NM_001355019 NM_002715 NP_001341948 NP_002706 NR_149151	12
chr1	1723572	1746801	23230	*	5	4449	14704	FALSE	chr1	1659529	1692795	33267	-	1660103	1676699	728661	728661	SLC35E2B	NM_001110781 NM_001290264 NP_001104251 NP_001277193	10
chr1	1723572	1746801	23230	*	5	4449	14704	FALSE	chr1	1702379	1737688	35310	-	1702907	1722818	728642	728642	CDK11A	NM_001313896 NM_001313982 NM_024011 NM_033527 NM_033529 NM_033532 NM_033534 NP_001300825 NP_001300911 NP_076916 NP_277071 NR_132739 NR_132740	17
chr5	134524291	134595716	71426	*	11	7250	14696.6	FALSE	chr5	134524312	134583230	58919	+	134535858	134579317	23338	23338	JADE2	NM_001289984 NM_001289985 NM_001308143 NM_001388185 NM_001388186 NM_001388187 NM_001388188 NM_015288 NP_001276913 NP_001276914 NP_001295072 NP_001375114 NP_001375115 NP_001375116 NP_001375117 NP_056103 XM_011543291 XM_024446007 XP_011541593 XP_024301775	17
chr7	32889992	32893073	3082	*	2	2791	14624.3	FALSE	chr7	32868172	32894131	25960	-	32869345	32879604	25948	25948	KBTBD2	NM_015483 NP_056298 XM_005249696 XM_005249697 XM_011515256 XM_011515257 XP_005249753 XP_005249754 XP_011513558 XP_011513559	8
chr2	98537433	98581025	43593	*	6	3782	14616.4	FALSE	chr2	98608579	98618515	9937	+	98609709	98618304	25972	25972	UNC50	NM_001330353 NM_001330354 NM_014044 NP_001317282 NP_001317283 NP_054763 XM_006712403 XP_006712466	5
chr9	120856801	120944903	88103	*	7	6023	14609.3	FALSE	chr9	120815496	120842951	27456	-	120815723	120842909	5711	5711	PSMD5	NM_001270427 NM_005047 NP_001257356 NP_005038	11
chr9	120856801	120944903	88103	*	7	6023	14609.3	FALSE	chr9	120855651	120894896	39246	-	120857944	120894829	26147	26147	PHF19	NM_001009936 NM_001286840 NM_001286842 NM_001286843 NM_015651 NP_001009936 NP_001273769 NP_001273771 NP_001273772 NP_056466 NR_104601 XM_005251906 XM_011518509 XM_011518511 XM_011518515 XM_011518516 XM_017014612 XM_017014613 XM_024447504 XM_024447505 XM_024447506 XM_024447507 XP_005251963 XP_011516811 XP_011516813 XP_011516817 XP_011516818 XP_016870101 XP_016870102 XP_024303272 XP_024303273 XP_02…	19
chr9	120856801	120944903	88103	*	7	6023	14609.3	FALSE	chr9	120902393	120929173	26781	-	120905020	120926075	7185	7185	TRAF1	NM_001190945 NM_001190947 NM_005658 NP_001177874 NP_001177876 NP_005649	10
chr17	49646223	49688432	42210	*	6	4155	14570.5	FALSE	chr17	49598884	49678163	79280	-	49600378	49622810	8405	8405	SPOP	NM_001007226 NM_001007227 NM_001007228 NM_001007229 NM_001007230 NM_001370730 NM_001370731 NM_001370732 NM_003563 NP_001007227 NP_001007228 NP_001007229 NP_001007230 NP_001007231 NP_001357659 NP_001357660 NP_001357661 NP_003554 XM_024450995 XP_024306763	20
chr13	52440902	52456053	15152	*	4	3532	14522.2	FALSE	chr13	52455429	52476628	21200	+	52455557	52475141	26586	26586	CKAP2	NM_001098525 NM_001286686 NM_001286687 NM_018204 NP_001091995 NP_001273615 NP_001273616 NP_060674 XM_005266344 XM_011535043 XP_005266401 XP_011533345	10
chr13	52440902	52456053	15152	*	4	3532	14522.2	FALSE	chr13	52377167	52416373	39207	-	52377411	52402600	55901	55901	THSD1	NM_018676 NM_199263 NP_061146 NP_954872	6
chr13	52440902	52456053	15152	*	4	3532	14522.2	FALSE	chr13	52412602	52450634	38033	-	52415830	52450594	51028	51028	VPS36	NM_001282168 NM_001282169 NM_016075 NP_001269097 NP_001269098 NP_057159	15
chr11	45843186	45854207	11022	*	4	3203	14520.2	FALSE	chr11	45847118	45883248	36131	+	45847250	45872231	1408	1408	CRY2	NM_001127457 NM_021117 NP_001120929 NP_066940	14
chr11	45843186	45854207	11022	*	4	3203	14520.2	FALSE	chr11	45885651	45906465	20815	+	45885821	45905721	9479	9479	MAPK8IP1	NM_005456 NP_005447	13
chr6	27810003	27839294	29292	*	4	5356	14504.9	FALSE	chr6	27808173	27808667	495	+	27808210	27808602	8329	8329	H2AC13	NM_003509 NP_003500	1
chr6	27810003	27839294	29292	*	4	5356	14504.9	FALSE	chr6	27810051	27811300	1250	+	27810074	27810484	8357	8357	H3C10	NM_003536 NP_003527	1
chr6	27810003	27839294	29292	*	4	5356	14504.9	FALSE	chr6	27815022	27815489	468	+	27815044	27815424	8342	8342	H2BC14	NM_003521 NP_003512	1
chr6	27810003	27839294	29292	*	4	5356	14504.9	FALSE	chr6	27824092	27824480	389	+	27824125	27824436	8363	8363	H4C11	NM_021968 NP_068803	1
chr6	27810003	27839294	29292	*	4	5356	14504.9	FALSE	chr6	27838569	27839110	542	+	27838662	27839042	8341	8341	H2BC15	NM_003520 NP_003511	1
chr6	27810003	27839294	29292	*	4	5356	14504.9	FALSE	chr6	27807479	27807929	451	-	27807526	27807906	8340	8340	H2BC13	NM_003519 NP_003510	1
chr6	27810003	27839294	29292	*	4	5356	14504.9	FALSE	chr6	27814302	27814777	476	-	27814354	27814740	8331	8331	H2AC14	NM_021066 NP_066544	1
chr6	27810003	27839294	29292	*	4	5356	14504.9	FALSE	chr6	27865317	27865798	482	+	27865355	27865747	8332	8332	H2AC16	NM_003511 NP_003502	1
chr6	27810003	27839294	29292	*	4	5356	14504.9	FALSE	chr6	27831174	27831560	387	-	27831216	27831527	8362	8362	H4C12	NM_003541 NP_003532	1
chr6	27810003	27839294	29292	*	4	5356	14504.9	FALSE	chr6	27837880	27838375	496	-	27837947	27838339	8330	8330	H2AC15	NM_003510 NP_003501	1
chr14	60247793	60258211	10419	*	2	2285	14472.7	FALSE	chr14	60245752	60299087	53336	+	60245848	60292482	5494	5494	PPM1A	NM_021003 NM_177951 NM_177952 NP_066283 NP_808820 NP_808821 XM_005267779 XM_005267781 XM_011536872 XM_011536876 XM_011536877 XM_011536878 XM_011536879 XM_011536880 XM_011536881 XM_011536882 XM_011536883 XM_017021381 XM_017021382 XM_017021383 XM_017021384 XM_017021385 XM_017021386 XM_017021387 XM_024449637 XP_005267836 XP_005267838 XP_011535174 XP_011535178 XP_011535179 XP_011535180 XP_011535181 X…	13
chr1	175174186	175193503	19318	*	5	4698	14437.5	FALSE	chr1	175156986	175192999	36014	-	175160169	175161013	9674	9674	KIAA0040	NM_001162893 NM_001162894 NM_001162895 NM_001319230 NM_001319231 NM_014656 NP_001156365 NP_001156366 NP_001156367 NP_001306159 NP_001306160 NP_055471 XM_017002911 XP_016858400	6
chr5	151127625	151158055	30431	*	3	4411	14386.2	FALSE	chr5	151029945	151093577	63633	-	151030070	151065095	10318	10318	TNIP1	NM_001252385 NM_001252386 NM_001252390 NM_001252391 NM_001252392 NM_001252393 NM_001258454 NM_001258455 NM_001258456 NM_001364486 NM_001364487 NM_006058 NP_001239314 NP_001239315 NP_001239319 NP_001239320 NP_001239321 NP_001239322 NP_001245383 NP_001245384 NP_001245385 NP_001351415 NP_001351416 NP_006049 XM_005268355 XM_006714752 XM_017008945 XM_017008946 XM_017008947 XM_017008948 XM_017008949 XM…	24
chr5	151127625	151158055	30431	*	3	4411	14386.2	FALSE	chr5	151100706	151157785	57080	-	151100889	151147901	309	309	ANXA6	NM_001155 NM_001193544 NM_001363114 NM_004033 NP_001146 NP_001180473 NP_001350043	29
chr15	66489970	66505679	15710	*	3	3034	14378.4	FALSE	chr15	66504959	66550130	45172	+	66505339	66546679	55055	55055	ZWILCH	NM_001287821 NM_001287822 NM_001287823 NM_017975 NP_001274750 NP_001274751 NP_001274752 NP_060445 NR_003105 XR_001751344 XR_001751345	21
chr15	66489970	66505679	15710	*	3	3034	14378.4	FALSE	chr15	66488658	66497780	9123	-	66494436	66497731	10302	10302	SNAPC5	NM_001329613 NM_001329614 NM_001329615 NM_006049 NP_001316542 NP_001316543 NP_001316544 NP_006040 NR_138061	5
chr6	89260513	89312399	51887	*	8	6312	14377.6	FALSE	chr6	89177504	89231278	53775	-	89178770	89217322	2569	2569	GABRR1	NM_001256703 NM_001256704 NM_001267582 NM_002042 NP_001243632 NP_001243633 NP_001254511 NP_002033 XM_017010689 XP_016866178	14
chr6	89260513	89312399	51887	*	8	6312	14377.6	FALSE	chr6	89254464	89315299	60836	-	89257670	89315165	2570	2570	GABRR2	NM_002043 NP_002034 XM_011535713 XM_011535714 XM_011535715 XM_011535716 XM_011535717 XP_011534015 XP_011534016 XP_011534017 XP_011534018 XP_011534019	10
chr12	124537897	124568112	30216	*	6	4955	14361.2	FALSE	chr12	124324415	124567589	243175	-	124325402	124495251	9612	9612	NCOR2	NM_001077261 NM_001206654 NM_006312 NP_001070729 NP_001193583 NP_006303	51
chr19	10717524	10760417	42894	*	6	5563	14360.6	FALSE	chr19	10718055	10833488	115434	+	10718243	10833460	1785	1785	DNM2	NM_001005360 NM_001005361 NM_001005362 NM_001190716 NM_004945 NP_001005360 NP_001005361 NP_001005362 NP_001177645 NP_004936	26
chr10	44959104	44979125	20022	*	4	4201	14353.1	FALSE	chr10	44959407	44995891	36485	+	44970203	44993329	83937	83937	RASSF4	NM_032023 NM_178145 NP_114412	11
chr10	44959104	44979125	20022	*	4	4201	14353.1	FALSE	chr10	45000923	45005326	4404	+	45003369	45004043	7570	7570	ZNF22	NM_006963 NP_008894	2
chr10	44959104	44979125	20022	*	4	4201	14353.1	FALSE	chr10	44970981	44978809	7829	-	44977392	44978030	11067	11067	DEPP1	NM_007021 NP_008952	3
chr15	75023486	75030218	6733	*	4	2336	14339.2	FALSE	chr15	75023586	75117462	93877	+	75028319	75049235	60490	60490	PPCDC	NM_001301101 NM_001301102 NM_001301103 NM_001301104 NM_001301105 NM_021823 NP_001288030 NP_001288031 NP_001288032 NP_001288033 NP_001288034 NP_068595 NR_125369 XM_017022461 XM_017022462 XM_017022463 XM_017022464 XM_017022465 XP_016877950 XP_016877951 XP_016877952 XP_016877953 XP_016877954	8
chr12	116320057	116361923	41867	*	7	5627	14334.9	FALSE	chr12	115958576	116277693	319118	-	115961266	116277131	23389	23389	MED13L	NM_015335 NP_056150 XM_011538080 XM_011538081 XM_011538082 XM_017019090 XP_011536382 XP_011536383 XP_011536384 XP_016874579	29
chr17	58504717	58531270	26554	*	3	3535	14330.7	FALSE	chr17	58420167	58488408	68242	-	58422360	58488274	124535	124535	HSF5	NM_001080439 NP_001073908 XM_011524283 XP_011522585	6
chr17	58504717	58531270	26554	*	3	3535	14330.7	FALSE	chr17	58489529	58517905	28377	-	58491663	58516582	9110	9110	MTMR4	NM_001378066 NM_001378067 NM_004687 NP_001364995 NP_001364996 NP_004678 XM_005257786 XM_006722168 XM_011525460 XP_005257843 XP_006722231 XP_011523762	23
chr6	159968475	159983963	15489	*	4	3540	14303.2	FALSE	chr6	159969082	160113507	144426	+	159969247	160105084	3482	3482	IGF2R	NM_000876 NP_000867	52
chr20	57374728	57399029	24302	*	4	4903	14298.7	FALSE	chr20	57391396	57409333	17938	+	57391582	57407846	55544	55544	RBM38	NM_001291780 NM_017495 NM_183425 NP_001278709 NP_059965 NP_906270 XM_005260446 XM_011528885 XP_005260503 XP_011527187	6
chr10	71835953	71909981	74029	*	9	5952	14264	FALSE	chr10	71816298	71851251	34954	-	71817441	71851221	5660	5660	PSAP	NM_001042465 NM_001042466 NM_002778 NP_001035930 NP_001035931 NP_002769	15
chr4	112279635	112313168	33534	*	5	3821	14251.5	FALSE	chr4	112285509	112442621	157113	+	112377778	112441210	80216	80216	ALPK1	NM_001102406 NM_001253884 NM_025144 NP_001095876 NP_001240813 NP_079420	23
chr4	112279635	112313168	33534	*	5	3821	14251.5	FALSE	chr4	112274537	112285904	11368	-	112277862	112278416	92610	92610	TIFA	NM_052864 NP_443096	3
chr15	65790728	65805029	14302	*	2	2795	14240.9	FALSE	chr15	65659123	65792293	133171	-	65661851	65756450	10260	10260	DENND4A	NM_001144823 NM_001320835 NM_001376919 NM_001376920 NM_005848 NP_001138295 NP_001307764 NP_001363848 NP_001363849 NP_005839 XM_005254120 XM_005254122 XM_006720371 XM_011521156 XM_011521157 XM_017021862 XM_017021864 XM_017021865 XM_024449819 XP_005254177 XP_005254179 XP_006720434 XP_011519458 XP_011519459 XP_016877351 XP_016877353 XP_016877354 XP_024305587 XR_001751047 XR_002957625	35
chr16	4505056	4538933	33878	*	7	4102	14231.7	FALSE	chr16	4556340	4600758	44419	+	4556490	4600317	342346	342346	C16orf96	NM_001145011 NM_001387219 NP_001138483 NP_001374148 XM_005255298 XM_005255301 XM_011522475 XP_005255355 XP_005255358 XP_011520777	16
chr6	11366565	11386802	20238	*	3	2843	14204.4	FALSE	chr6	11183298	11382348	199051	-	11185162	11306003	4739	4739	NEDD9	NM_001142393 NM_001271033 NM_006403 NM_182966 NP_001135865 NP_001257962 NP_006394 NP_892011 NR_073131	17
chr13	79373986	79406760	32775	*	5	4197	14194.4	FALSE	chr13	79311824	79406477	94654	-	79314970	79405774	64062	64062	RBM26	NM_001286631 NM_001286632 NM_001366735 NM_018605 NM_022118 NP_001273560 NP_001273561 NP_001353664 NP_071401 XM_005266491 XM_005266497 XM_006719857 XM_011535179 XM_011535180 XM_011535181 XM_011535182 XM_011535183 XM_011535184 XM_011535185 XM_011535186 XM_011535187 XM_011535188 XM_011535189 XM_011535190 XM_011535191 XM_011535192 XM_011535193 XM_011535195 XM_017020688 XM_017020689 XM_017020690 XM_01…	23
chr3	101561408	101584226	22819	*	3	3062	14188.2	FALSE	chr3	101324205	101513241	189037	-	101325943	101513130	57337	57337	SENP7	NM_001077203 NM_001282801 NM_001282802 NM_001282803 NM_001282804 NM_020654 NP_001070671 NP_001269730 NP_001269731 NP_001269732 NP_001269733 NP_065705 XM_005247662 XM_011513038 XM_011513039 XM_011513040 XM_011513041 XM_011513042 XM_011513045 XM_017006924 XM_017006925 XM_017006926 XM_017006927 XM_017006928 XM_017006929 XP_005247719 XP_011511340 XP_011511341 XP_011511342 XP_011511343 XP_011511344 XP…	25
chr3	101561408	101584226	22819	*	3	3062	14188.2	FALSE	chr3	101561868	101566446	4579	+	101564782	101565993	54931	54931	TRMT10C	NM_017819 NP_060289	3
chr3	101561408	101584226	22819	*	3	3062	14188.2	FALSE	chr3	101574180	101594465	20286	+	101574216	101592753	57092	57092	PCNP	NM_001320395 NM_001320397 NM_001320398 NM_001320399 NM_001320400 NM_001320401 NM_020357 NP_001307324 NP_001307326 NP_001307327 NP_001307328 NP_001307329 NP_001307330 NP_065090 NR_135223 NR_135224 NR_135225 NR_135226 NR_135227 NR_135228 NR_135229 NR_135230 NR_135231 NR_135232 XM_017006922 XP_016862411	6
chr5	108380578	108383231	2654	*	1	2654	14143.4	FALSE	chr5	107859035	108382098	523064	-	107861720	108381691	64839	64839	FBXL17	NM_001163315 NM_022824 NP_001156787 XM_005272048 XM_005272050 XM_011543574 XM_011543575 XM_011543576 XM_011543577 XM_011543578 XM_011543579 XM_011543580 XM_017009729 XP_005272105 XP_005272107 XP_011541876 XP_011541877 XP_011541878 XP_011541879 XP_011541880 XP_011541881 XP_011541882 XP_016865218 XR_427717	9
chr19	18272374	18292715	20342	*	4	3762	14139	FALSE	chr19	18279694	18281622	1929	-	18280441	18281484	3727	3727	JUND	NM_001286968 NM_005354 NP_001273897 NP_005345	1
chr19	18272374	18292715	20342	*	4	3762	14139	FALSE	chr19	18207961	18255419	47459	-	18210929	18233191	5143	5143	PDE4C	NM_000923 NM_001098818 NM_001098819 NM_001330172 NM_001369701 NM_001395274 NP_000914 NP_001092288 NP_001092289 NP_001317101 NP_001356630 NP_001382203 NR_040546 XM_011528058 XM_024451535 XP_011526360 XP_024307303	22
chr19	18272374	18292715	20342	*	4	3762	14139	FALSE	chr19	18340598	18369950	29353	+	18340682	18369898	54858	54858	PGPEP1	NM_001300927 NM_001308366 NM_001329471 NM_001329476 NM_001329477 NM_001329478 NM_017712 NP_001287856 NP_001295295 NP_001316400 NP_001316405 NP_001316406 NP_001316407 NP_060182 NR_138029	7
chr19	18272374	18292715	20342	*	4	3762	14139	FALSE	chr19	18249950	18255419	5470	-	18250130	18255307	729966	729966	LOC729966	NM_001396036 NP_001382965 NR_036575	3
chr19	18272374	18292715	20342	*	4	3762	14139	FALSE	chr19	18257098	18274500	17403	-	18257180	18269478	80726	80726	IQCN	NM_001145304 NM_001145305 NM_025249 NP_001138776 NP_001138777 NP_079525 XM_005260084 XM_011528324 XP_005260141 XP_011526626	5
chr15	44710881	44712786	1906	*	1	1906	14133.6	FALSE	chr15	44554818	44663688	108871	-	44555182	44663647	80208	80208	SPG11	NM_001160227 NM_025137 NP_001153699 NP_079413 XM_006720700 XM_006720701 XM_017022634 XM_017022635 XM_017022636 XP_006720763 XP_006720764 XP_016878123 XP_016878124 XP_016878125 XR_001751402 XR_931917	45
chr15	44710881	44712786	1906	*	1	1906	14133.6	FALSE	chr15	44665732	44711323	45592	-	44665789	44676490	197135	197135	PATL2	NM_001145112 NM_001330283 NM_001387260 NM_001387261 NM_001387262 NM_001387263 NM_001387264 NP_001138584 NP_001317212 NP_001374189 NP_001374190 NP_001374191 NP_001374192 NP_001374193 XM_011521336 XM_011521337 XM_011521338 XM_011521339 XM_011521340 XM_011521341 XM_011521342 XM_011521343 XM_011521344 XM_011521345 XM_011521346 XM_011521347 XM_017022001 XP_011519638 XP_011519639 XP_011519640 XP_011519…	19
chr9	86336851	86354838	17988	*	4	4002	14114.4	FALSE	chr9	86287733	86354454	66722	-	86288677	86353199	79670	79670	TUT7	NM_001185059 NM_001185074 NM_001330718 NM_024617 NP_001171988 NP_001172003 NP_001317647 NP_078893 XM_005252207 XM_005252208 XM_006717283 XM_011519011 XM_011519012 XM_011519013 XM_011519014 XM_011519015 XM_011519016 XM_017015130 XM_017015131 XM_024447671 XM_024447672 XP_005252264 XP_005252265 XP_006717346 XP_011517313 XP_011517314 XP_011517315 XP_011517316 XP_011517317 XP_011517318 XP_016870619 XP…	29
chr14	68793391	68796428	3038	*	3	2008	14095.3	FALSE	chr14	68787660	68796253	8594	-	68789533	68796149	677	677	ZFP36L1	NM_001244698 NM_001244701 NM_004926 NP_001231627 NP_001231630 NP_004917	4
chr15	40928714	40953999	25286	*	5	3659	14091.3	FALSE	chr15	40929340	40939073	9734	+	40929669	40938034	54567	54567	DLL4	NM_019074 NP_061947	9
chr15	40928714	40953999	25286	*	5	3659	14091.3	FALSE	chr15	40952962	40956512	3551	+	40953584	40955774	79094	79094	CHAC1	NM_001142776 NM_024111 NP_001136248 NP_077016 XM_024450045 XM_024450046 XM_024450047 XP_024305813 XP_024305814 XP_024305815	3
chr5	177351099	177372507	21409	*	5	3702	14075.8	FALSE	chr5	177301198	177311870	10673	-	177301743	177303288	53917	53917	RAB24	NM_001031677 NM_130781 NP_001026847 NP_570137 NR_109789 NR_109790	8
chr5	177351099	177372507	21409	*	5	3702	14075.8	FALSE	chr5	177305500	177312757	7258	-	177307119	177311830	83463	83463	MXD3	NM_001142935 NM_001394986 NM_001394987 NM_031300 NP_001136407 NP_001381915 NP_001381916 NP_112590	4
chr5	177351099	177372507	21409	*	5	3702	14075.8	FALSE	chr5	177357924	177372596	14673	+	177358025	177372075	10636	10636	RGS14	NM_001366617 NM_001366618 NM_006480 NP_001353546 NP_001353547 NP_006471 XM_024454328 XP_024310096	13
chr5	177351099	177372507	21409	*	5	3702	14075.8	FALSE	chr5	177379235	177398848	19614	+	177385742	177398286	6569	6569	SLC34A1	NM_001167579 NM_003052 NP_001161051 NP_003043 XM_017009773 XM_017009774 XM_017009775 XM_024446191 XP_016865262 XP_016865263 XP_016865264 XP_024301959 XR_941112 XR_941113	12
chr5	177351099	177372507	21409	*	5	3702	14075.8	FALSE	chr5	177331567	177351668	20102	-	177332086	177351647	10960	10960	LMAN2	NM_006816 NP_006807	7
chr5	177351099	177372507	21409	*	5	3702	14075.8	FALSE	chr5	177403204	177442901	39698	+	177426846	177441827	2870	2870	GRK6	NM_001004105 NM_001004106 NM_001364164 NM_002082 NP_001004105 NP_001004106 NP_001351093 NP_002073 XM_006714858 XM_006714859 XM_011534537 XM_011534538 XM_024446032 XP_006714921 XP_006714922 XP_011532839 XP_011532840 XP_024301800	20
chr2	196158738	196183490	24753	*	5	3907	14054.2	FALSE	chr2	196133583	196176503	42921	-	196137447	196163383	9262	9262	STK17B	NM_004226 NP_004217 XM_011512168 XM_011512169 XM_011512170 XM_011512171 XP_011510470 XP_011510471 XP_011510472 XP_011510473	13
chr4	52684739	52722755	38017	*	5	4107	14024.1	FALSE	chr4	52590960	52659301	68342	-	52597640	52659150	64854	64854	USP46	NM_001134223 NM_001286767 NM_001286768 NM_022832 NP_001127695 NP_001273696 NP_001273697 NP_073743 XM_017008557 XP_016864046	14
chr4	52684739	52722755	38017	*	5	4107	14024.1	FALSE	chr4	52712394	52866835	154442	+	52862508	52865805	65997	65997	RASL11B	NM_023940 NP_076429	14
chr8	144077893	144105157	27265	*	4	4376	14011	FALSE	chr8	144078648	144080648	2001	+	144078729	144080601	54512	54512	EXOSC4	NM_019037 NP_061910 XM_011517134 XP_011515436	3
chr8	144077893	144105157	27265	*	4	4376	14011	FALSE	chr8	144082590	144086216	3627	+	144082731	144086125	8733	8733	GPAA1	NM_003801 NP_003792	5
chr8	144077893	144105157	27265	*	4	4376	14011	FALSE	chr8	144095039	144097525	2487	+	144095100	144097336	1537	1537	CYC1	NM_001916 NP_001907 XM_017013102 XM_024447072 XP_016868591 XP_024302840	5
chr8	144077893	144105157	27265	*	4	4376	14011	FALSE	chr8	144104461	144107611	3151	+	144105684	144107255	84232	84232	MAF1	NM_032272 NP_115648	7
chr8	144077893	144105157	27265	*	4	4376	14011	FALSE	chr8	144107726	144118328	10603	+	144107751	144116293	340390	340390	WDR97	NM_001316309 NM_032529 NP_001303238 NR_024207 XM_024447145 XP_024302913	13
chr8	144077893	144105157	27265	*	4	4376	14011	FALSE	chr8	144051266	144063965	12700	-	144051326	144063934	26873	26873	OPLAH	NM_017570 NP_060040 XM_011516960 XP_011515262 XR_001745509	26
chr8	144077893	144105157	27265	*	4	4376	14011	FALSE	chr8	144137774	144140851	3078	+	144137836	144139552	51236	51236	HGH1	NM_016458 NP_057542 XR_001745537	5
chr8	144077893	144105157	27265	*	4	4376	14011	FALSE	chr8	144148016	144261927	113912	+	144163827	144261740	727957	727957	MROH1	NM_001099280 NM_001099281 NM_001288814 NM_032450 NP_001092750 NP_001092751 NP_001275743 NP_115826 XM_011517270 XM_011517271 XM_011517273 XM_011517274 XM_011517285 XM_011517286 XM_017013802 XM_017013803 XM_017013807 XM_024447252 XM_024447253 XM_024447254 XM_024447255 XM_024447256 XM_024447257 XM_024447258 XM_024447259 XM_024447260 XM_024447261 XM_024447262 XM_024447263 XM_024447264 XP_011515572 XP…	47
chr8	144077893	144105157	27265	*	4	4376	14011	FALSE	chr8	144098633	144108124	9492	-	144098878	144103753	81858	81858	SHARPIN	NM_030974 NP_112236 NR_038270 XM_017013887 XM_017013888 XP_016869376 XP_016869377	10
chr17	41665662	41689876	24215	*	4	3589	13993.3	FALSE	chr17	41619442	41624842	5401	-	41619594	41624509	3872	3872	KRT17	NM_000422 NP_000413	8
chr17	41665662	41689876	24215	*	4	3589	13993.3	FALSE	chr17	41688885	41692668	3784	+	41689039	41690933	10209	10209	EIF1	NM_005801 NP_005792	2
chr17	41665662	41689876	24215	*	4	3589	13993.3	FALSE	chr17	41712331	41715969	3639	+	41715437	41715872	2520	2520	GAST	NM_000805 NP_000796	3
chr3	179141667	179167245	25579	*	4	5055	13991.2	FALSE	chr3	179148114	179240093	91980	+	179198826	179234364	5290	5290	PIK3CA	NM_006218 NP_006209 XM_006713658 XM_011512894 XP_006713721 XP_011511196	22
chr2	74167916	74206926	39011	*	5	5542	13989	FALSE	chr2	74186172	74217565	31394	+	74187435	74214242	10797	10797	MTHFD2	NM_001040409 NM_006636 NP_006627 NR_027405 XM_006711924 XP_006711987	12
chr2	74167916	74206926	39011	*	5	5542	13989	FALSE	chr2	74135400	74147912	12513	-	74135522	74147874	388962	388962	BOLA3	NM_001035505 NM_212552 NP_001030582 NP_997717	3
chr2	74167916	74206926	39011	*	5	5542	13989	FALSE	chr2	74152528	74178898	26371	-	74156568	74178674	55233	55233	MOB1A	NM_001317110 NM_001317111 NM_001317112 NM_018221 NP_001304039 NP_001304040 NP_001304041 NP_060691 XM_024452973 XP_024308741	7
chr14	31206595	31208687	2093	*	1	2093	13975.8	FALSE	chr14	31100117	31207804	107688	-	31100930	31205936	25831	25831	HECTD1	NM_015382 NP_056197 XM_005267502 XM_011536619 XM_011536621 XM_011536622 XM_017021148 XM_017021149 XM_017021151 XM_017021152 XM_017021153 XM_024449526 XM_024449527 XP_005267559 XP_011534921 XP_011534923 XP_011534924 XP_016876637 XP_016876638 XP_016876640 XP_016876641 XP_016876642 XP_024305294 XP_024305295 XR_001750214 XR_001750215	41
chr16	68227306	68285807	58502	*	7	6944	13974.9	FALSE	chr16	68245304	68261058	15755	+	68245427	68259657	23659	23659	PLA2G15	NM_001363551 NM_012320 NP_001350480 NP_036452 XM_011522979 XM_011522980 XP_011521281 XP_011521282	6
chr16	68227306	68285807	58502	*	7	6944	13974.9	FALSE	chr16	68310951	68360852	49902	+	68315980	68357878	54496	54496	PRMT7	NM_001184824 NM_001290018 NM_001351143 NM_001351144 NM_001378018 NM_001378020 NM_001378021 NM_001378022 NM_001378023 NM_019023 NP_001171753 NP_001276947 NP_001338072 NP_001338073 NP_001364947 NP_001364949 NP_001364950 NP_001364951 NP_001364952 NP_061896 NR_147056 NR_147057 NR_147058 NR_165365 NR_165366 NR_165367 NR_165368 NR_165369 NR_165370 NR_165371 NR_165372 NR_165373 XM_011523112 XM_011523113…	21
chr16	68227306	68285807	58502	*	7	6944	13974.9	FALSE	chr16	68229033	68238102	9070	-	68230226	68236045	80004	80004	ESRP2	NM_001365264 NM_001365265 NM_024939 NP_001352193 NP_001352194 NP_079215 XM_005256153 XM_006721273 XP_005256210 XP_006721336	13
chr16	68227306	68285807	58502	*	7	6944	13974.9	FALSE	chr16	68264516	68301823	37308	+	68274727	68297328	9057	9057	SLC7A6	NM_001076785 NM_003983 NP_001070253 NP_003974 XM_011523433 XM_011523434 XM_011523438 XM_024450486 XM_024450487 XM_024450488 XP_011521735 XP_011521736 XP_011521740 XP_024306254 XP_024306255 XP_024306256 XR_001752018 XR_002957851 XR_243433	14
chr3	138593644	138609542	15899	*	3	3003	13972.8	FALSE	chr3	138608606	138633376	24771	+	138610958	138633079	55179	55179	FAIM	NM_001033030 NM_001033031 NM_001033032 NM_018147 NP_001028202 NP_001028203 NP_001028204 NP_060617 XM_011512950 XP_011511252	8
chr3	138593644	138609542	15899	*	3	3003	13972.8	FALSE	chr3	138494344	138594538	100195	-	138495015	138591862	80321	80321	CEP70	NM_001288964 NM_001288965 NM_001288966 NM_001288967 NM_001320598 NM_001320599 NM_001320600 NM_024491 NP_001275893 NP_001275894 NP_001275895 NP_001275896 NP_001307527 NP_001307528 NP_001307529 NP_077817 XM_011513209 XM_017007271 XM_017007272 XM_017007273 XM_017007274 XM_017007275 XM_017007276 XM_017007277 XM_017007278 XM_017007279 XM_017007280 XM_017007281 XM_017007282 XM_017007283 XM_017007284 XM…	23
chr6	95576962	95600496	23535	*	5	4814	13969.8	FALSE	chr6	95577485	95609470	31986	+	95586440	95606405	79694	79694	MANEA	NM_024641 NP_078917 XM_005267147 XP_005267204	9
chr1	110337655	110339861	2207	*	1	2207	13965.1	FALSE	chr1	110338506	110346681	8176	+	110339406	110346354	64783	64783	RBM15	NM_001201545 NM_014092 NM_022768 NP_001188474 NP_073605	3
chr11	67583485	67614878	31394	*	7	5014	13960.5	FALSE	chr11	67583742	67586656	2915	+	67583844	67586577	2950	2950	GSTP1	NM_000852 NP_000843	3
chr11	67583485	67614878	31394	*	7	5014	13960.5	FALSE	chr11	67605653	67612554	6902	+	67607005	67612458	4723	4723	NDUFV1	NM_001166102 NM_007103 NP_001159574 NP_009034	6
chr19	41928868	41940204	11337	*	3	2409	13950.1	FALSE	chr19	41907704	41928449	20746	-	41908228	41912919	390937	390937	ERFL	NM_001365103 NP_001352032 XM_017027573 XP_016883062	6
chr14	77027650	77040800	13151	*	5	2966	13941.6	FALSE	chr14	77024543	77028708	4166	-	77025402	77027792	64207	64207	IRF2BPL	NM_024496 NP_078772	1
chr2	20411040	20448056	37017	*	5	5077	13940.2	FALSE	chr2	20447074	20449440	2367	+	20447466	20448056	388	388	RHOB	NM_004040 NP_004031	1
chr20	24985978	25017990	32013	*	6	3659	13925.2	FALSE	chr20	24962925	24992751	29827	-	24963813	24992688	57136	57136	APMAP	NM_020531 NP_065392 XM_005260763 XP_005260820	10
chr7	106864593	106872457	7865	*	4	3047	13894.9	FALSE	chr7	106865278	106908980	43703	+	106867562	106905387	5294	5294	PIK3CG	NM_001282426 NM_001282427 NM_002649 NP_001269355 NP_001269356 NP_002640 XM_005250443 XM_011516316 XM_011516317 XM_017012328 XP_005250500 XP_011514618 XP_011514619 XP_016867817	13
chr17	75288872	75298343	9472	*	3	3286	13894	FALSE	chr17	75236599	75262363	25765	-	75237449	75261587	23163	23163	GGA3	NM_001172703 NM_001172704 NM_001291641 NM_001291642 NM_014001 NM_138619 NP_001166174 NP_001166175 NP_001278570 NP_001278571 NP_054720 NP_619525 XM_011524563 XM_017024385 XM_017024386 XM_017024387 XM_017024388 XM_017024389 XM_017024390 XM_017024392 XM_024450665 XP_011522865 XP_016879874 XP_016879875 XP_016879876 XP_016879877 XP_016879878 XP_016879879 XP_016879881 XP_024306433	13
chr17	75288872	75298343	9472	*	3	3286	13894	FALSE	chr17	75266228	75271231	5004	-	75266740	75270740	57409	57409	MIF4GD	NM_001242498 NM_001242500 NM_001242501 NM_001363806 NM_001365751 NM_001365752 NM_001365753 NM_001365754 NM_001365755 NM_001370592 NM_020679 NP_001229427 NP_001229429 NP_001229430 NP_001350735 NP_001352680 NP_001352681 NP_001352682 NP_001352683 NP_001352684 NP_001357521 NP_065730 XM_011525052 XM_011525054 XM_011525055 XM_017024888 XM_017024889 XM_017024890 XM_017024891 XM_017024895 XP_011523354 XP…	3
chr17	75288872	75298343	9472	*	3	3286	13894	FALSE	chr17	75272981	75289510	16530	-	75273238	75286764	60386	60386	SLC25A19	NM_001126121 NM_001126122 NM_021734 NP_001119593 NP_001119594 NP_068380 XM_005257559 XM_005257560 XM_005257561 XM_005257562 XM_006722007 XM_017024926 XM_017024927 XM_017024928 XP_005257616 XP_005257617 XP_005257618 XP_005257619 XP_006722070 XP_016880415 XP_016880416 XP_016880417	8
chr6	159033046	159045260	12215	*	4	3377	13880	FALSE	chr6	158972871	159000202	27332	-	158977538	158999550	83861	83861	RSPH3	NM_001346418 NM_031924 NP_001333347 NP_114130 NR_144434 XM_017011347 XM_024446566 XP_016866836 XP_024302334 XR_001743668 XR_001743669 XR_001743670 XR_001743671	8
chr5	157847932	157871642	23711	*	4	2619	13844.3	FALSE	chr5	157785743	157859145	73403	-	157787646	157858970	9685	9685	CLINT1	NM_001195555 NM_001195556 NM_014666 NP_001182484 NP_001182485 NP_055481 XM_011534701 XM_017010087 XM_017010088 XP_011533003 XP_016865576 XP_016865577	13
chr15	52216984	52235576	18593	*	5	3038	13838	FALSE	chr15	52115100	52191392	76293	-	52122757	52184676	10681	10681	GNB5	NM_001379343 NM_006578 NM_016194 NP_001366272 NP_006569 NP_057278 XM_011521162 XM_017021867 XP_011519464 XP_016877356 XR_001751060	17
chr19	10390511	10417098	26588	*	4	4182	13801.3	FALSE	chr19	10391133	10420121	28989	-	10391551	10403479	11140	11140	CDC37	NM_007065 NP_008996 XM_011527652 XP_011525954	10
chr19	10390511	10417098	26588	*	4	4182	13801.3	FALSE	chr19	10416773	10469630	52858	+	10416943	10467621	5141	5141	PDE4A	NM_001111307 NM_001111308 NM_001111309 NM_001243121 NM_006202 NP_001104777 NP_001104778 NP_001104779 NP_001230050 NP_006193 XM_011528054 XM_011528055 XM_017026865 XM_024451534 XP_011526356 XP_011526357 XP_016882354 XP_024307302	19
chr19	10390511	10417098	26588	*	4	4182	13801.3	FALSE	chr19	10350529	10380572	30044	-	10350834	10378406	7297	7297	TYK2	NM_001385197 NM_001385198 NM_001385199 NM_001385200 NM_001385201 NM_001385202 NM_001385203 NM_001385204 NM_001385205 NM_001385206 NM_001385207 NM_003331 NP_001372126 NP_001372127 NP_001372128 NP_001372129 NP_001372130 NP_001372131 NP_001372132 NP_001372133 NP_001372134 NP_001372135 NP_001372136 NP_003322 XM_011528245 XM_011528246 XM_011528247 XM_011528249 XM_011528251 XP_011526547 XP_011526548 XP…	27
chr10	74144370	74177299	32930	*	5	4589	13800.5	FALSE	chr10	74151202	74709963	558762	+	74151279	74708445	132	132	ADK	NM_001123 NM_001202449 NM_001202450 NM_001369123 NM_001369124 NM_006721 NP_001114 NP_001189378 NP_001189379 NP_001356052 NP_001356053 NP_006712 XM_017015698 XM_017015699 XM_017015702 XM_017015703 XM_017015704 XM_017015705 XM_017015706 XP_016871187 XP_016871188 XP_016871191 XP_016871192 XP_016871193 XP_016871194 XP_016871195	18
chr10	74144370	74177299	32930	*	5	4589	13800.5	FALSE	chr10	74120255	74150842	30588	-	74123810	74138379	26985	26985	AP3M1	NM_001320263 NM_001320264 NM_001320265 NM_012095 NM_207012 NP_001307192 NP_001307193 NP_001307194 NP_036227 NP_996895 NR_135191 XM_024447939 XP_024303707 XR_001747091 XR_001747092	10
chr1	167703608	167722577	18970	*	4	4497	13795.3	FALSE	chr1	167721950	167791919	69970	+	167722152	167787921	9019	9019	MPZL1	NM_001146191 NM_003953 NM_024569 NP_001139663 NP_003944 NP_078845	8
chr14	39169644	39175885	6242	*	2	2514	13773.3	FALSE	chr14	39175183	39183220	8038	+	39175280	39181863	5411	5411	PNN	NM_002687 NP_002678	7
chr14	39169644	39175885	6242	*	2	2514	13773.3	FALSE	chr14	39147811	39170532	22722	-	39150350	39170095	122553	122553	TRAPPC6B	NM_001079537 NM_177452 NP_001073005 NP_803235 XM_011536409 XM_017020964 XP_011534711 XP_016876453	5
chr11	33257086	33270258	13173	*	2	2374	13770	FALSE	chr11	33256672	33357023	100352	+	33286415	33353568	10114	10114	HIPK3	NM_001048200 NM_001278162 NM_001278163 NM_005734 NP_001041665 NP_001265091 NP_001265092 NP_005725 XM_005252729 XM_017017076 XP_005252786 XP_016872565	20
chr1	156105292	156135048	29757	*	4	5708	13752.4	FALSE	chr1	156072013	156082465	10453	-	156076574	156081998	92312	92312	MEX3A	NM_001093725 NP_001087194	2
chr1	156105292	156135048	29757	*	4	5708	13752.4	FALSE	chr1	156147366	156177752	30387	+	156154579	156176997	64218	64218	SEMA4A	NM_001193300 NM_001193301 NM_001193302 NM_001370567 NM_001370568 NM_001370569 NM_001370571 NM_022367 NP_001180229 NP_001180230 NP_001180231 NP_001357496 NP_001357497 NP_001357498 NP_001357500 NP_071762 XM_011509871 XM_011509872 XM_011509874 XM_011509875 XM_011509878 XP_011508173 XP_011508174 XP_011508176 XP_011508177 XP_011508180	18
chr15	63530916	63583713	52798	*	7	3690	13743.1	FALSE	chr15	63597353	63602428	5076	+	63597393	63601686	283807	283807	FBXL22	NM_001367807 NM_001367808 NM_001367809 NM_203373 NP_001354736 NP_001354737 NP_001354738 NP_976307 XM_006720478 XM_011521468 XM_011521469 XM_011521472 XP_006720541 XP_011519770 XP_011519771 XP_011519774	3
chr15	40893709	40907693	13985	*	2	3234	13732.3	FALSE	chr15	40894450	40903975	9526	+	40894769	40903341	57617	57617	VPS18	NM_020857 NP_065908 XM_011521843 XM_011521844 XM_017022447 XP_011520145 XP_011520146 XP_016877936	6
chr15	40893709	40907693	13985	*	2	3234	13732.3	FALSE	chr15	40872214	40874234	2021	-	40873058	40874139	171177	171177	RHOV	NM_133639 NP_598378	3
chr15	40893709	40907693	13985	*	2	3234	13732.3	FALSE	chr15	40929340	40939073	9734	+	40929669	40938034	54567	54567	DLL4	NM_019074 NP_061947	9
chr15	40893709	40907693	13985	*	2	3234	13732.3	FALSE	chr15	40952962	40956512	3551	+	40953584	40955774	79094	79094	CHAC1	NM_001142776 NM_024111 NP_001136248 NP_077016 XM_024450045 XM_024450046 XM_024450047 XP_024305813 XP_024305814 XP_024305815	3
chr14	75175713	75189306	13594	*	3	2527	13726.2	FALSE	chr14	75079353	75127344	47992	-	75084564	75126921	91754	91754	NEK9	NM_001329237 NM_001329238 NM_033116 NP_001316166 NP_001316167 NP_149107 XM_005268209 XM_024449741 XP_005268266 XP_024305509	26
chr14	75175713	75189306	13594	*	3	2527	13726.2	FALSE	chr14	75131469	75176612	45144	-	75134885	75176579	10972	10972	TMED10	NM_006827 NP_006818	7
chr6	125345677	125364040	18364	*	4	5765	13722.7	FALSE	chr6	125221928	125302078	80151	-	125276146	125301932	51020	51020	HDDC2	NM_016063 NP_057147 XM_024446450 XP_024302218 XR_245538	9
chr7	76379700	76397905	18206	*	4	3442	13702.9	FALSE	chr7	76397518	76442071	44554	+	76424965	76442056	7784	7784	ZP3	NM_001110354 NM_007155 NP_001103824 NP_009086 XM_017012586 XP_016868075	10
chr7	76379700	76397905	18206	*	4	3442	13702.9	FALSE	chr7	76326799	76358991	32193	-	76329577	76358808	7532	7532	YWHAG	NM_012479 NP_036611	2
chr3	149812292	149825733	13442	*	2	1836	13701.8	FALSE	chr3	149812770	149962139	149370	+	149846027	149961104	11342	11342	RNF13	NM_001378285 NM_001378286 NM_001378287 NM_001378288 NM_001378289 NM_001378290 NM_001378291 NM_007282 NM_183381 NM_183382 NM_183383 NM_183384 NP_001365214 NP_001365215 NP_001365216 NP_001365217 NP_001365218 NP_001365219 NP_001365220 NP_009213 NP_899237 NP_899239 NR_165474 XM_011512373 XM_011512374 XM_011512376 XM_017005661 XM_024453332 XP_011510675 XP_011510676 XP_011510678 XP_016861150 XP_0243091…	14
chr15	84715792	84736876	21085	*	4	3444	13700.4	FALSE	chr15	84748592	84806445	57854	+	84782676	84802393	9640	9640	ZNF592	NM_014630 NP_055445 XM_005254996 XM_011522246 XM_011522247 XM_011522248 XM_017022734 XP_005255053 XP_011520548 XP_011520549 XP_011520550 XP_016878223 XR_931951	11
chr15	84715792	84736876	21085	*	4	3444	13700.4	FALSE	chr15	84669538	84716460	46923	-	84669943	84716075	23478	23478	SEC11A	NM_001271918 NM_001271919 NM_001271920 NM_001271921 NM_001271922 NM_014300 NP_001258847 NP_001258848 NP_001258849 NP_001258850 NP_001258851 NP_055115 NR_073518	10
chr5	55307041	55339096	32056	*	5	3693	13661.8	FALSE	chr5	55307989	55425579	117591	+	55308014	55424772	23517	23517	MTREX	NM_015360 NP_056175	28
chr5	55307041	55339096	32056	*	5	3693	13661.8	FALSE	chr5	55256055	55307694	51640	-	55256488	55307573	54505	54505	DHX29	NM_001345964 NM_001345965 NM_019030 NP_001332893 NP_001332894 NP_061903 NR_144323 NR_144324 NR_144325 XR_001742128	26
chr11	112016051	112025816	9766	*	2	2409	13657.3	FALSE	chr11	112025408	112064404	38997	+	112025473	112062535	1737	1737	DLAT	NM_001372031 NM_001372032 NM_001372033 NM_001372034 NM_001372035 NM_001372036 NM_001372037 NM_001372038 NM_001372039 NM_001372040 NM_001372041 NM_001372042 NM_001931 NP_001358960 NP_001358961 NP_001358962 NP_001358963 NP_001358964 NP_001358965 NP_001358966 NP_001358967 NP_001358968 NP_001358969 NP_001358970 NP_001358971 NP_001922 NR_164072	14
chr11	112016051	112025816	9766	*	2	2409	13657.3	FALSE	chr11	112074086	112085150	11065	+	112075575	112082972	55216	55216	NKAPD1	NM_001082969 NM_001082970 NM_001301017 NM_001301019 NM_001301021 NM_018195 NP_001076438 NP_001076439 NP_001287946 NP_001287948 NP_001287950 NP_060665 NR_103469	5
chr3	50226266	50246555	20290	*	4	4986	13648.4	FALSE	chr3	50226292	50259362	33071	+	50227124	50257690	2771	2771	GNAI2	NM_001166425 NM_001282617 NM_001282618 NM_001282619 NM_001282620 NM_002070 NP_001159897 NP_001269546 NP_001269547 NP_001269548 NP_001269549 NP_002061	13
chr3	50226266	50246555	20290	*	4	4986	13648.4	FALSE	chr3	50267558	50277546	9989	+	50269241	50276706	7869	7869	SEMA3B	NM_001005914 NM_001290060 NM_001290061 NM_001290062 NM_001290063 NM_004636 NP_001005914 NP_001276989 NP_001276990 NP_001276991 NP_001276992 NP_004627 NR_110697	12
chr3	50226266	50246555	20290	*	4	4986	13648.4	FALSE	chr3	50279087	50288114	9028	+	50279114	50287202	132228	132228	LSMEM2	NM_001304385 NM_153215 NP_001291314 NP_694947 XM_006712979 XM_006712980 XM_011533370 XM_024453354 XP_006713042 XP_006713043 XP_011531672 XP_024309122	4
chr19	42242133	42255172	13040	*	3	2653	13625.8	FALSE	chr19	42198598	42232149	33552	-	42199438	42232149	162989	162989	DEDD2	NM_001270614 NM_001270615 NM_133328 NP_001257543 NP_001257544 NP_579874 NR_073046 NR_073047 NR_073048 NR_073049 NR_073050 NR_073051 NR_073052 XM_011526569 XM_011526571 XM_011526572 XM_017026402 XM_017026403 XM_024451400 XP_011524871 XP_011524873 XP_011524874 XP_016881891 XP_016881892 XP_024307168 XR_935758	10
chr19	42242133	42255172	13040	*	3	2653	13625.8	FALSE	chr19	42247569	42255128	7560	-	42248465	42254999	2077	2077	ERF	NM_001301035 NM_001308402 NM_001312656 NM_006494 NP_001287964 NP_001295331 NP_001299585 NP_006485 XM_017026468 XM_017026469 XP_016881957 XP_016881958	6
chr19	42242133	42255172	13040	*	3	2653	13625.8	FALSE	chr19	42268537	42295797	27261	+	42271784	42295191	23152	23152	CIC	NM_001304815 NM_001379480 NM_001379482 NM_001379484 NM_001379485 NM_001386298 NM_015125 NP_001291744 NP_001366409 NP_001366411 NP_001366413 NP_001366414 NP_001373227 NP_055940 XM_005258673 XM_005258674 XM_005258675 XM_011526662 XM_011526664 XM_011526665 XM_011526666 XM_011526667 XM_024451432 XM_024451433 XP_005258730 XP_005258731 XP_005258732 XP_011524964 XP_011524966 XP_011524967 XP_011524968 XP…	24
chr19	42242133	42255172	13040	*	3	2653	13625.8	FALSE	chr19	42302098	42310814	8717	+	42309585	42310740	284338	284338	PRR19	NM_199285 NP_954979 XM_005258779 XM_005258780 XM_006723154 XM_011526787 XM_011526788 XM_011526789 XM_011526790 XP_005258836 XP_005258837 XP_006723217 XP_011525089 XP_011525090 XP_011525091 XP_011525092	3
chr19	42242133	42255172	13040	*	3	2653	13625.8	FALSE	chr19	42226225	42255132	28908	-	42226225	42254999	2931	2931	GSK3A	NM_019884 NP_063937 XR_001753673	21
chr19	42242133	42255172	13040	*	3	2653	13625.8	FALSE	chr19	42086110	42196585	110476	-	42091257	42132411	5452	5452	POU2F2	NM_001207025 NM_001207026 NM_001247994 NM_001393934 NM_001393935 NM_001393936 NM_001394376 NM_001394377 NM_001394378 NM_002698 NP_001193954 NP_001193955 NP_001234923 NP_001380863 NP_001380864 NP_001380865 NP_001381305 NP_001381306 NP_001381307 NP_002689 XM_011527041 XM_011527042 XM_011527043 XM_017026884 XM_017026885 XM_017026886 XM_017026887 XM_017026888 XM_017026889 XM_017026890 XM_017026891 XM…	21
chr2	74457212	74483543	26332	*	4	5100	13563.1	FALSE	chr2	74455087	74457944	2858	+	74455117	74457864	83444	83444	INO80B	NM_031288 NP_112578	4
chr2	74457212	74483543	26332	*	4	5100	13563.1	FALSE	chr2	74455088	74460884	5797	+	74455117	74459689	100532735	100532735	INO80B-WBP1	NR_037849	8
chr2	74457212	74483543	26332	*	4	5100	13563.1	FALSE	chr2	74458400	74460891	2492	+	74458603	74460681	23559	23559	WBP1	NM_012477 NP_036609	2
chr2	74457212	74483543	26332	*	4	5100	13563.1	FALSE	chr2	74393836	74421662	27827	-	74408208	74421560	388963	388963	C2orf81	NM_001145054 NM_001316764 NM_001316765 NM_001316766 NP_001138526 NP_001303693 NP_001303694 NP_001303695	7
chr2	74457212	74483543	26332	*	4	5100	13563.1	FALSE	chr2	74483073	74494559	11487	+	74483096	74493218	64427	64427	TTC31	NM_001376129 NM_001376130 NM_001376132 NM_001376133 NM_001376134 NM_001376135 NM_001376136 NM_001376137 NM_001376138 NM_001376139 NM_001376140 NM_001376141 NM_001376144 NM_001376145 NM_022492 NP_001363058 NP_001363059 NP_001363061 NP_001363062 NP_001363063 NP_001363064 NP_001363065 NP_001363066 NP_001363067 NP_001363068 NP_001363069 NP_001363070 NP_001363073 NP_001363074 NP_071937 NR_027749 NR_16…	5
chr2	74457212	74483543	26332	*	4	5100	13563.1	FALSE	chr2	74425835	74442422	16588	-	74426243	74441816	6242	6242	RTKN	NM_001015055 NM_001015056 NM_033046 NP_001015055 NP_001015056 NP_149035 XM_005264478 XM_005264479 XM_017004635 XM_017004636 XM_017004637 XM_017004638 XM_017004639 XM_017004640 XP_005264535 XP_005264536 XP_016860124 XP_016860125 XP_016860126 XP_016860127 XP_016860128 XP_016860129 XR_001738881 XR_939704 XR_939705 XR_939706	14
chr2	74457212	74483543	26332	*	4	5100	13563.1	FALSE	chr2	74461057	74465410	4354	-	74461275	74465247	7841	7841	MOGS	NM_001146158 NM_006302 NP_001139630 NP_006293	2
chr2	74457212	74483543	26332	*	4	5100	13563.1	FALSE	chr2	74513463	74517148	3686	+	74514224	74516431	3196	3196	TLX2	NM_001534 NM_016170 NP_057254	5
chr2	74457212	74483543	26332	*	4	5100	13563.1	FALSE	chr2	74471982	74472687	706	-	74472119	74472660	116540	116540	MRPL53	NM_053050 NP_444278	2
chr2	74457212	74483543	26332	*	4	5100	13563.1	FALSE	chr2	74471986	74483408	11423	-	74472795	74482837	84865	84865	CCDC142	NM_001365575 NM_032779 NP_001352504 NP_116168	9
chr2	74457212	74483543	26332	*	4	5100	13563.1	FALSE	chr2	74529725	74533332	3608	+	74530007	74532985	27429	27429	HTRA2	NM_001321727 NM_001321728 NM_013247 NM_145074 NP_001308656 NP_001308657 NP_037379 NP_659540 NR_135769 NR_135770 NR_135771 NR_135772	6
chr20	5112645	5127998	15354	*	3	3868	13558.2	FALSE	chr20	5126879	5197887	71009	+	5127093	5190234	8760	8760	CDS2	NM_003818 NP_003809 XM_006723660 XM_011529390 XM_024452016 XP_006723723 XP_011527692 XP_024307784	14
chr20	5112645	5127998	15354	*	3	3868	13558.2	FALSE	chr20	5066082	5113103	47022	-	5069188	5113028	29058	29058	TMEM230	NM_001009923 NM_001009924 NM_001009925 NM_001330984 NM_001330985 NM_001330986 NM_001330987 NM_014145 NP_001009923 NP_001009924 NP_001009925 NP_001317913 NP_001317914 NP_001317915 NP_001317916 NP_054864 XM_017027836 XM_024451879 XP_016883325 XP_024307647 XR_002958476 XR_002958477 XR_002958478 XR_002958479 XR_002958480 XR_002958481 XR_002958482 XR_002958483 XR_002958484 XR_002958485	12
chr20	5112645	5127998	15354	*	3	3868	13558.2	FALSE	chr20	5114953	5126626	11674	-	5115283	5119798	5111	5111	PCNA	NM_002592 NM_182649 NP_002583 NP_872590	7
chr22	39446233	39468153	21921	*	5	2773	13535.6	FALSE	chr22	39457012	39492194	35183	+	39486166	39488949	4248	4248	MGAT3	NM_001098270 NM_002409 NP_001091740 NP_002400	5
chr22	39446233	39468153	21921	*	5	2773	13535.6	FALSE	chr22	39499432	39518132	18701	+	39511295	39515373	54471	54471	MIEF1	NM_001304564 NM_001394030 NM_013298 NM_019008 NP_001291493 NP_001380959 NP_061881 NR_130789 NR_130790 XM_011530236 XM_011530237 XM_011530238 XM_017028838 XP_011528538 XP_011528539 XP_011528540 XP_016884327	14
chr13	77319893	77339870	19978	*	5	4867	13526.4	FALSE	chr13	77042474	77327094	284621	-	77045378	77326775	23077	23077	MYCBP2	NM_015057 NP_055872 XM_005266299 XM_006719779 XM_006719780 XM_006719781 XM_006719782 XM_006719783 XM_006719784 XM_006719785 XM_006719786 XM_006719787 XM_006719788 XM_006719789 XM_011535004 XM_011535005 XM_017020454 XM_017020455 XM_017020456 XM_017020457 XM_017020458 XM_017020459 XM_017020460 XM_017020461 XM_017020462 XM_017020463 XM_017020464 XM_017020465 XM_017020466 XM_017020467 XM_017020468 XP…	87
chrX	19841188	19888499	47312	*	8	3805	13526.2	FALSE	chrX	19533977	19887600	353624	-	19536417	19887310	30011	30011	SH3KBP1	NM_001024666 NM_001184960 NM_001353890 NM_001353891 NM_001353892 NM_001353893 NM_001353894 NM_001353895 NM_001353897 NM_031892 NP_001019837 NP_001171889 NP_001340819 NP_001340820 NP_001340821 NP_001340822 NP_001340823 NP_001340824 NP_001340826 NP_114098 XM_011545498 XM_011545499 XM_011545500 XM_011545502 XM_011545503 XM_017029460 XM_017029461 XM_017029464 XM_017029465 XM_017029467 XM_017029468 XM…	26
chr1	197771437	197819864	48428	*	3	3698	13507.9	FALSE	chr1	197504748	197775696	270949	-	197510460	197775155	163486	163486	DENND1B	NM_001142795 NM_001195215 NM_001195216 NM_001300858 NM_019049 NM_144977 NP_001182144 NP_001182145 NP_001287787 NP_659414 NR_125340 XM_005244931 XM_006711192 XM_006711193 XM_006711194 XM_011509246 XM_011509247 XM_011509248 XM_011509249 XM_011509251 XM_017000470 XM_017000471 XM_024453626 XM_024453627 XP_005244988 XP_006711255 XP_006711256 XP_006711257 XP_011507548 XP_011507549 XP_011507550 XP_01150…	25
chr17	42979946	43022483	42538	*	7	5347	13501.2	FALSE	chr17	42980565	42995142	14578	+	42980577	42991716	146923	146923	RUNDC1	NM_001321381 NM_001394222 NM_173079 NP_001308310 NP_001381151 NP_775102 XM_005257078 XP_005257135	5
chr17	42979946	43022483	42538	*	7	5347	13501.2	FALSE	chr17	42998273	43002959	4687	+	42998751	43002920	6155	6155	RPL27	NM_000988 NM_001349921 NM_001349922 NP_000979 NP_001336850 NP_001336851 NR_146327	4
chr17	42979946	43022483	42538	*	7	5347	13501.2	FALSE	chr17	43006740	43014456	7717	+	43006948	43014299	3430	3430	IFI35	NM_001330230 NM_005533 NP_001317159 NP_005524 XM_017024584 XM_017024585 XP_016880073 XP_016880074	5
chr17	42979946	43022483	42538	*	7	5347	13501.2	FALSE	chr17	42950526	42964498	13973	-	42950593	42964440	80755	80755	AARSD1	NM_001261434 NP_001248363	10
chr17	42979946	43022483	42538	*	7	5347	13501.2	FALSE	chr17	43025231	43032041	6811	+	43025348	43028680	8153	8153	RND2	NM_005440 NP_005431 XM_011525316 XM_011525317 XP_011523618 XP_011523619	5
chr17	42979946	43022483	42538	*	7	5347	13501.2	FALSE	chr17	42968088	42980433	12346	-	42969148	42980053	100885848	100885848	PTGES3L	NM_001142653 NM_001142654 NM_001261430 NP_001136125 NP_001136126 NP_001248359	5
chr17	42979946	43022483	42538	*	7	5347	13501.2	FALSE	chr17	42950526	42980528	30003	-	42950593	42980053	100885850	100885850	PTGES3L-AARSD1	NM_001136042 NM_025267 NP_001129514 NP_079543	18
chr17	42979946	43022483	42538	*	7	5347	13501.2	FALSE	chr17	43014607	43025123	10517	-	43016061	43022322	10493	10493	VAT1	NM_006373 NP_006364	8
chr8	61689523	61714968	25446	*	6	3954	13501.1	FALSE	chr8	61500556	61714640	214085	-	61503359	61714371	444	444	ASPH	NM_001164750 NM_001164751 NM_001164752 NM_001164753 NM_001164754 NM_001164755 NM_001164756 NM_004318 NM_020164 NM_032466 NM_032467 NM_032468 NP_001158222 NP_001158223 NP_001158224 NP_001158225 NP_001158226 NP_001158227 NP_001158228 NP_004309 NP_064549 NP_115855 NP_115856 NP_115857 XM_005251235 XM_005251236 XM_005251239 XM_005251240 XM_005251242 XM_005251243 XM_005251244 XM_005251246 XM_005251247 …	37
chr6	166381142	166383798	2657	*	1	2657	13499.9	FALSE	chr6	166319728	166342576	22849	-	166320217	166342481	113402	113402	SFT2D1	NM_145169 NP_660152 NR_130112 NR_130113 NR_130114	8
chr6	166381142	166383798	2657	*	1	2657	13499.9	FALSE	chr6	166364919	166383013	18095	-	166365429	166382876	51660	51660	MPC1	NM_001270879 NM_001376565 NM_001376566 NM_001376567 NM_001376568 NM_001376569 NM_016098 NP_001257808 NP_001363494 NP_001363495 NP_001363496 NP_001363497 NP_001363498 NP_057182 NR_073093 NR_164828 NR_164829 NR_164830 NR_164831 XM_011535895 XM_024446456 XP_011534197 XP_024302224	8
chr4	102826672	102828727	2056	*	1	2056	13478.3	FALSE	chr4	102868974	102892807	23834	+	102869085	102887430	493856	493856	CISD2	NM_001008388 NP_001008389	6
chr17	31309704	31321984	12281	*	3	2004	13474.8	FALSE	chr17	31294647	31297239	2593	-	31295009	31296331	4974	4974	OMG	NM_002544 NP_002535	2
chr17	31309704	31321984	12281	*	3	2004	13474.8	FALSE	chr17	31303770	31318831	15062	-	31304263	31318785	2124	2124	EVI2B	NM_006495 NP_006486 XM_005257946 XP_005258003	5
chr17	31309704	31321984	12281	*	3	2004	13474.8	FALSE	chr17	31316410	31321749	5340	-	31318303	31320431	2123	2123	EVI2A	NM_001003927 NM_014210 NP_001003927 NP_055025	4
chr5	61306228	61367452	61225	*	6	4952	13467.4	FALSE	chr5	61332258	61546172	213915	+	61332273	61544317	57688	57688	ZSWIM6	NM_020928 NP_065979 XM_017009677 XM_024446139 XM_024446140 XP_016865166 XP_024301907 XP_024301908	14
chr22	26657406	26711872	54467	*	7	4582	13450.5	FALSE	chr22	26599278	26618027	18750	-	26599490	26616319	1414	1414	CRYBB1	NM_001887 NP_001878 XM_011529899 XP_011528201	7
chr11	11841335	11849722	8388	*	2	2900	13435.1	FALSE	chr11	11841423	11961887	120465	+	11842186	11956175	55031	55031	USP47	NM_001282659 NM_001330208 NM_001372091 NM_001372092 NM_001372093 NM_001372094 NM_001372095 NM_001372096 NM_001372097 NM_001372098 NM_001372099 NM_001372100 NM_001372101 NM_001372102 NM_001372103 NM_017944 NP_001269588 NP_001317137 NP_001359020 NP_001359021 NP_001359022 NP_001359023 NP_001359024 NP_001359025 NP_001359026 NP_001359027 NP_001359028 NP_001359029 NP_001359030 NP_001359031 NP_001359032…	31
chr15	43791798	43801000	9203	*	2	2544	13434	FALSE	chr15	43791842	43800279	8438	+	43792377	43799673	100529067	100529067	SERF2-C15ORF63	NR_037673	5
chr15	43791798	43801000	9203	*	2	2544	13434	FALSE	chr15	43792354	43804427	12074	+	43792377	43801806	25764	25764	HYPK	NM_001199885 NM_016400 NP_001186814 NP_057484	4
chr15	43791798	43801000	9203	*	2	2544	13434	FALSE	chr15	43826980	43868412	41433	+	43827033	43866392	79968	79968	WDR76	NM_001167941 NM_024908 NP_001161413 NP_079184 XM_005254680 XP_005254737 XR_001751398	14
chr15	43791798	43801000	9203	*	2	2544	13434	FALSE	chr15	43772605	43799133	26529	-	43773116	43799133	80237	80237	ELL3	NM_025165 NP_079441	17
chr15	43791798	43801000	9203	*	2	2544	13434	FALSE	chr15	43794162	43800220	6059	-	43795000	43799986	619189	619189	SERINC4	NM_001258031 NM_001258032 NP_001244960 NP_001244961	10
chr11	62786394	62807001	20608	*	4	3702	13415.2	FALSE	chr11	62787402	62790400	2999	+	62787432	62790047	374395	374395	TMEM179B	NM_001363599 NM_001363600 NM_001363601 NM_199337 NP_001350528 NP_001350529 NP_001350530 NP_955369	2
chr11	62786394	62807001	20608	*	4	3702	13415.2	FALSE	chr11	62750963	62754184	3222	-	62752090	62754062	79842	79842	ZBTB3	NM_001363108 NM_001363109 NM_001370809 NM_024784 NP_001350037 NP_001350038 NP_001357738	2
chr11	62786394	62807001	20608	*	4	3702	13415.2	FALSE	chr11	62771629	62792006	20378	-	62772106	62791994	79064	79064	TMEM223	NM_001080501 NM_024084 NP_001073970	5
chr11	62786394	62807001	20608	*	4	3702	13415.2	FALSE	chr11	62792123	62806302	14180	-	62792476	62805356	10482	10482	NXF1	NM_001081491 NM_006362 NP_001074960 NP_006353 XR_001747724	21
chr11	62786394	62807001	20608	*	4	3702	13415.2	FALSE	chr11	62856004	62888880	32877	+	62856270	62888693	6520	6520	SLC3A2	NM_001012661 NM_001012662 NM_001012663 NM_001012664 NM_001013251 NM_002394 NP_001012680 NP_001012682 NP_001013269 NP_002385 NR_037193	13
chr5	102754594	102763378	8785	*	4	3385	13404.4	FALSE	chr5	102753981	103029730	275750	+	102866196	103029065	5066	5066	PAM	NM_000919 NM_001177306 NM_001319943 NM_001364582 NM_001364583 NM_001364584 NM_001364585 NM_001364586 NM_001364587 NM_001364588 NM_001364589 NM_001364590 NM_001364591 NM_001364592 NM_001364593 NM_001364594 NM_138766 NM_138821 NM_138822 NP_000910 NP_001170777 NP_001306872 NP_001351511 NP_001351512 NP_001351513 NP_001351514 NP_001351515 NP_001351516 NP_001351517 NP_001351518 NP_001351519 NP_00135152…	38
chr7	129948968	129953005	4038	*	3	2639	13391.5	FALSE	chr7	129830732	129952960	122229	-	129834937	129952555	7328	7328	UBE2H	NM_001202498 NM_003344 NM_182697 NP_001189427 NP_003335 NP_874356	13
chr6	36650717	36683362	32646	*	7	4785	13384.5	FALSE	chr6	36676460	36687337	10878	+	36684102	36685800	1026	1026	CDKN1A	NM_000389 NM_001220777 NM_001220778 NM_001291549 NM_001374509 NM_001374510 NM_001374511 NM_001374512 NM_001374513 NM_078467 NP_000380 NP_001207706 NP_001207707 NP_001278478 NP_001361438 NP_001361439 NP_001361440 NP_001361441 NP_001361442 NP_510867 NR_164655 NR_164656	8
chr6	36650717	36683362	32646	*	7	4785	13384.5	FALSE	chr6	36697826	36733184	35359	+	36704236	36732093	401258	401258	RAB44	NM_001257357 NM_207498 NP_001244286 XM_024446435 XM_024446436 XM_024446437 XM_024446438 XM_024446439 XM_024446440 XM_024446441 XP_024302203 XP_024302204 XP_024302205 XP_024302206 XP_024302207 XP_024302208 XP_024302209	14
chr11	22656995	22681538	24544	*	5	3662	13383.3	FALSE	chr11	22622533	22625823	3291	-	22624686	22625810	2188	2188	FANCF	NM_022725 NP_073562	1
chr14	103549122	103563370	14249	*	2	1916	13330.4	FALSE	chr14	103561896	103714249	152354	+	103563002	103701203	3831	3831	KLC1	NM_001130107 NM_001394832 NM_001394833 NM_001394834 NM_001394835 NM_001394836 NM_001394837 NM_001394838 NM_001394839 NM_001394840 NM_001394841 NM_001394842 NM_001394843 NM_001394844 NM_001394845 NM_001394846 NM_001394847 NM_001394848 NM_001394849 NM_001394850 NM_001394851 NM_001394852 NM_001394853 NM_001394854 NM_001394855 NM_001394856 NM_001394857 NM_001394858 NM_001394859 NM_001394860 NM_005552…	23
chr14	103549122	103563370	14249	*	2	1916	13330.4	FALSE	chr14	103562960	103607523	44564	+	103562963	103590299	84334	84334	COA8	NM_001302652 NM_001302653 NM_001302654 NM_001370595 NP_001289581 NP_001289582 NP_001289583 NP_001357524 NR_126431 NR_126432	11
chr14	103549122	103563370	14249	*	2	1916	13330.4	FALSE	chr14	103519667	103522833	3167	-	103519864	103522493	1152	1152	CKB	NM_001362531 NM_001823 NP_001349460 NP_001814 XM_017020952 XP_016876441	6
chr14	103549122	103563370	14249	*	2	1916	13330.4	FALSE	chr14	103556545	103562657	6113	-	103559821	103561164	9529	9529	BAG5	NM_001015048 NM_001015049 NM_004873 NP_001015048 NP_001015049 NP_004864	3
chr15	60388957	60398749	9793	*	2	2834	13321	FALSE	chr15	60347134	60402883	55750	-	60347630	60397913	302	302	ANXA2	NM_001002857 NM_001002858 NM_001136015 NM_004039 NP_001002857 NP_001002858 NP_001129487 NP_004030 XM_017022090 XM_017022091 XM_017022092 XM_017022093 XM_024449908 XP_016877579 XP_016877580 XP_016877581 XP_016877582 XP_024305676	26
chr3	36992203	36994216	2014	*	1	2014	13320.8	FALSE	chr3	36826819	36945057	118239	-	36828275	36944809	9881	9881	TRANK1	NM_001329998 NM_014831 NP_001316927 NP_055646 XM_011534289 XM_017007570 XM_017007571 XM_017007572 XM_017007573 XP_011532591 XP_016863059 XP_016863060 XP_016863061 XP_016863062 XR_001740389 XR_001740390	27
chr3	36992203	36994216	2014	*	1	2014	13320.8	FALSE	chr3	36993350	37050846	57497	+	36993548	37050653	4292	4292	MLH1	NM_000249 NM_001167617 NM_001167618 NM_001167619 NM_001258271 NM_001258273 NM_001258274 NM_001354615 NM_001354616 NM_001354617 NM_001354618 NM_001354619 NM_001354620 NM_001354621 NM_001354622 NM_001354623 NM_001354624 NM_001354625 NM_001354626 NM_001354627 NM_001354628 NM_001354629 NM_001354630 NP_000240 NP_001161089 NP_001161090 NP_001161091 NP_001245200 NP_001245202 NP_001245203 NP_001341544 NP…	25
chr3	36992203	36994216	2014	*	1	2014	13320.8	FALSE	chr3	36985043	36993131	8089	-	36991254	36993077	9852	9852	EPM2AIP1	NM_014805 NP_055620	1
chr19	58572781	58576043	3263	*	2	1952	13317.8	FALSE	chr19	58551452	58555105	3654	-	58551649	58554212	27243	27243	CHMP2A	NM_014453 NM_198426 NP_055268 NP_940818 XM_005258746 XM_005258747 XP_005258803 XP_005258804	1
chr19	58572781	58576043	3263	*	2	1952	13317.8	FALSE	chr19	58561932	58573575	11644	-	58562072	58571389	7593	7593	MZF1	NM_001267033 NM_003422 NM_198055 NP_001253962 NP_003413 NP_932172 XM_005259204 XM_011527264 XM_017027206 XM_024451689 XP_005259261 XP_011525566 XP_016882695 XP_024307457	6
chr19	58572781	58576043	3263	*	2	1952	13317.8	FALSE	chr19	58513530	58538911	25382	-	58514054	58517673	84878	84878	ZBTB45	NM_001316978 NM_001316979 NM_001316980 NM_001316981 NM_001316982 NM_032792 NP_001303907 NP_001303908 NP_001303909 NP_001303910 NP_001303911 NP_116181 XM_006723445 XP_006723508	5
chr19	58572781	58576043	3263	*	2	1952	13317.8	FALSE	chr19	58555712	58558954	3243	-	58556089	58558381	9040	9040	UBE2M	NM_003969 NP_003960	5
chr3	170171501	170189705	18205	*	3	2705	13296.2	FALSE	chr3	170222424	170305977	83554	+	170222670	170303127	5584	5584	PRKCI	NM_002740 NP_002731 XM_017006860 XP_016862349 XR_001740206	18
chr3	170171501	170189705	18205	*	3	2705	13296.2	FALSE	chr3	170086732	170181749	95018	-	170097230	170181715	80012	80012	PHC3	NM_001308116 NM_024947 NP_001295045 NP_079223 XM_005247789 XM_005247791 XM_005247793 XM_006713753 XM_006713754 XM_006713756 XM_006713757 XM_011513186 XM_011513187 XM_011513188 XM_011513189 XM_017007235 XM_017007236 XM_017007237 XM_017007238 XM_017007239 XP_005247846 XP_005247848 XP_005247850 XP_006713816 XP_006713817 XP_006713819 XP_006713820 XP_011511488 XP_011511489 XP_011511490 XP_011511491 XP…	19
chr12	68358762	68375323	16562	*	3	3861	13283.6	FALSE	chr12	68294566	68332381	37816	-	68295254	68332245	56890	56890	MDM1	NM_001205028 NM_001205029 NM_001354969 NM_001354970 NM_001354971 NM_001354972 NM_001354973 NM_001354974 NM_001368282 NM_017440 NM_020128 NP_001191957 NP_001191958 NP_001341898 NP_001341899 NP_001341900 NP_001341901 NP_001341902 NP_001341903 NP_001355211 NP_059136 NP_064513 XM_011538569 XM_017019650 XP_011536871 XP_016875139	14
chr14	34981461	34994850	13390	*	2	2721	13268.5	FALSE	chr14	34981957	35029686	47730	+	34996710	35029152	6729	6729	SRP54	NM_001146282 NM_003136 NP_001139754 NP_003127 XM_005268024 XM_011537106 XM_017021615 XP_005268081 XP_011535408 XP_016877104	18
chr1	25543624	25563848	20225	*	3	3535	13256.2	FALSE	chr1	25543606	25590356	46751	+	25543699	25566992	26119	26119	LDLRAP1	NM_015627 NP_056442 XM_006710559 XM_006710560 XM_006710561 XM_011541209 XM_011541210 XM_011541211 XM_011541212 XM_017000994 XM_017000995 XM_024446315 XP_006710622 XP_006710623 XP_006710624 XP_011539511 XP_011539512 XP_011539513 XP_011539514 XP_016856483 XP_016856484 XP_024302083 XR_001737112 XR_001737113 XR_002956258 XR_426598 XR_946602 XR_946603	11
chr1	9061675	9081219	19545	*	6	3667	13229.3	FALSE	chr1	9002973	9026423	23451	-	9003300	9026345	155184	155184	SLC2A7	NM_207420 NP_997303 XM_011540824 XM_011540825 XP_011539126 XP_011539127	12
chr2	182854129	182867488	13360	*	4	3483	13165.3	FALSE	chr2	182833275	182866637	33363	-	182834849	182866552	2487	2487	FRZB	NM_001463 NP_001454	6
chr5	50415682	50441876	26195	*	4	3802	13159.9	FALSE	chr5	50396192	50443248	47057	-	50399273	50441151	133418	133418	EMB	NM_198449 NP_940851 XM_011543146 XP_011541448	12
chr4	73068559	73070239	1681	*	1	1681	13156.1	FALSE	chr4	73052362	73069755	17394	-	73058114	73069649	285521	285521	COX18	NM_001033760 NM_001297732 NM_001297733 NM_001300729 NM_173827 NP_001284661 NP_001284662 NP_001287658 NP_776188 XM_005265680 XM_011531878 XM_017008045 XP_005265737 XP_011530180 XP_016863534 XR_001741209 XR_002959725	7
chr10	12348410	12378376	29967	*	7	4108	13149.1	FALSE	chr10	12349547	12835545	485999	+	12349819	12828887	57118	57118	CAMK1D	NM_001351032 NM_020397 NM_153498 NP_001337961 NP_065130 NP_705718 NR_027322 XM_006717482 XM_006717483 XM_011519591 XM_011519592 XM_011519593 XM_011519594 XM_011519595 XM_017016438 XM_024448087 XP_006717545 XP_006717546 XP_011517893 XP_011517894 XP_011517895 XP_011517896 XP_011517897 XP_016871927 XP_024303855	11
chr7	155638227	155655788	17562	*	3	2467	13135.6	FALSE	chr7	155644451	155781485	137035	+	155644877	155775161	155435	155435	RBM33	NM_001008408 NM_053043 NP_444271 XM_005249531 XM_005249532 XM_005249533 XM_005249534 XM_005249535 XM_011515840 XP_005249588 XP_005249589 XP_005249590 XP_005249591 XP_005249592 XP_011514142	20
chr7	155638227	155655788	17562	*	3	2467	13135.6	FALSE	chr7	155474206	155644406	170201	-	155503068	155545929	285888	285888	CNPY1	NM_001103176 NM_001369813 NM_001369814 NM_001369815 NM_001369816 NM_001369818 NM_001369820 NM_001369821 NM_001393663 NP_001096646 NP_001356743 NP_001356744 NP_001356745 NP_001356747 NP_001356749 NP_001356750 NP_001380592 NR_163157 NR_163158 NR_163159 NR_163160 NR_163161 NR_163162 NR_163163 NR_163164 NR_163165 NR_163166 NR_163167	16
chr19	1259180	1266902	7723	*	4	3437	13132.8	FALSE	chr19	1261166	1271029	9864	+	1270934	1271029	107985303	107985303	LOC107985303	XR_001753834	4
chr19	1259180	1266902	7723	*	4	3437	13132.8	FALSE	chr19	1259384	1274880	15497	+	1270934	1274311	1153	1153	CIRBP	NM_001280 NM_001300815 NM_001300829 NP_001271 NP_001287744 NP_001287758 NR_023312 NR_023313 XM_006722637 XM_011527668 XM_017026237 XP_006722700 XP_011525970 XP_016881726 XR_001753598 XR_001753599 XR_001753600	7
[truncated: 20,327 more rows]

## Sheet: NDMM2
seqnames	start	end	width	strand	NUM_LOCI	CONSTITUENT_SIZE	BAM_SIG	isSuper	seqnames	start	end	width	strand	CSS	CSE	Tx	Geneid	Gene	Refseq	Nexons	Exons
[truncated: 22,577 more rows]

[truncated: 6 more sheets: NDMM3, NDMM4, LRMM1, LRMM2, LRMM3, LRMM4]
