# Supplementary material for: Epigenetic Plasticity Drives Carcinogenesis and Multi-Therapy Resistance in Multiple Myeloma
Source: Research Square preprint supplement (doi:10.21203/rs.3.rs-6306816/v1), 2025-04-15
Supplement: Supplementary file 18 [file dfa7a7d3262f3563504f675d.xlsx]

## Sheet: Sheet1
Supplementary Table 3 - Cooccurrences between cytogenetic abnormalities and mutations in MM driver genes (by Fisher Exact Test).
t(11;14)
Hugo Symbol	Mutated in t(11;14)-positive	Mutated in t(11;14)-negative	p-value	FDR	Odds Ratio	Odds Ratio (low)	Odds Ratio (high)
CCND1	16 of 144 (11.1%)	4 of 636 (0.6%)	2.18184e-09	1.25232e-07	19.6321	6.19892	81.9559
IRF4	20 of 144 (13.9%)	10 of 636 (1.6%)	3.73828e-09	1.25232e-07	10.0499	4.36524	24.6482
SAMHD1	12 of 144 (8.3%)	8 of 636 (1.3%)	3.36998e-05	0.000752629	7.10963	2.61346	20.4707
IDH1	8 of 144 (5.6%)	4 of 636 (0.6%)	0.000287863	0.0048217	9.25385	2.43776	42.622
MAX	10 of 144 (6.9%)	11 of 636 (1.7%)	0.0018889	0.0247478	4.2292	1.57537	11.2189
RPL10	7 of 144 (4.9%)	5 of 636 (0.8%)	0.00221623	0.0247478	6.42564	1.72655	26.0731
NRAS	37 of 144 (25.7%)	94 of 636 (14.8%)	0.00282668	0.0270554	1.99183	1.25277	3.12639
t(4;14)
Hugo Symbol	Mutated in t(4;14)-positive	Mutated in t(4;14)-negative	p-value	FDR	Odds Ratio	Odds Ratio (low)	Odds Ratio (high)
PRKD2	14 of 65 (21.5%)	15 of 715 (2.1%)	5.70485e-09	3.82225e-07	12.7138	5.36559	30.0326
FGFR3	8 of 65 (12.3%)	6 of 715 (0.8%)	3.07622e-06	0.000103053	16.4377	4.81686	59.6047
DIS3	15 of 65 (23.1%)	57 of 715 (8.0%)	0.00036746	0.0082066	3.45475	1.69369	6.7365
t(14;16)
Hugo Symbol	Mutated in t(14;16)-positive	Mutated in t(14;16)-negative	p-value	FDR	Odds Ratio	Odds Ratio (low)	Odds Ratio (high)
MAF	4 of 22 (18.2%)	2 of 758 (0.3%)	6.90577e-06	0.000462687	81.1928	10.8709	933.141
Del(1p)
Hugo Symbol	Mutated in Del(1p)-positive	Mutated in Del(1p)-negative	p-value	FDR	Odds Ratio	Odds Ratio (low)	Odds Ratio (high)
(none)
Del(13q)
Hugo Symbol	Mutated in Del(13q)-positive	Mutated in Del(13q)-negative	p-value	FDR	Odds Ratio	Odds Ratio (low)	Odds Ratio (high)
TET2	20 of 311 (6.4%)	5 of 469 (1.1%)	4.11844e-05	0.00176272	6.36356	2.28464	21.9375
TP53	39 of 311 (12.5%)	21 of 469 (4.5%)	5.26184e-05	0.00176272	3.05428	1.7118	5.58819
RPL5	8 of 311 (2.6%)	0 of 469 (0%)	0.000604711	0.0135052	Inf	2.61497	Inf
MAX	16 of 311 (5.1%)	5 of 469 (1.1%)	0.000985072	0.0165	5.02302	1.73476	17.7214
TENT5C	13 of 311 (4.2%)	49 of 469 (10.4%)	0.00167351	0.022425	0.374347	0.182935	0.716046
Del(17p)
Hugo Symbol	Mutated in Del(17p)-positive	Mutated in Del(17p)-negative	p-value	FDR	Odds Ratio	Odds Ratio (low)	Odds Ratio (high)
TP53	32 of 112 (28.6%)	28 of 668 (4.2%)	6.84211e-14	4.58422e-12	9.09572	5.02153	16.5967
MAX	9 of 112 (8.0%)	12 of 668 (1.8%)	0.00123865	0.0414949	4.76202	1.72593	12.6668
Amp/Dup(1q21)
Hugo Symbol	Mutated in Amp/Dup(1q21)-positive	Mutated in Amp/Dup(1q21)-negative	p-value	FDR	Odds Ratio	Odds Ratio (low)	Odds Ratio (high)
DIS3	43 of 290 (14.8%)	29 of 490 (5.9%)	5.69092e-05	0.00381292	2.76356	1.64045	4.71347
