# Supplementary material for: Epigenetic Plasticity Drives Carcinogenesis and Multi-Therapy Resistance in Multiple Myeloma
Source: Research Square preprint supplement (doi:10.21203/rs.3.rs-6306816/v1), 2025-04-15
Supplement: Supplementary file 19 [file f4e2abbb5a0b0b3a31e06617.xlsx]

## Sheet: KEGG
MGUS --> SMM										SMM --> NDMM										NDMM --> ERMM										ERMM --> LRMM										NDMM --> LRMM
NAME	SIZE	ES	NES	NOM p-val	FDR q-val	FWER p-val	RANK AT MAX	LEADING EDGE		NAME	SIZE	ES	NES	NOM p-val	FDR q-val	FWER p-val	RANK AT MAX	LEADING EDGE		NAME	SIZE	ES	NES	NOM p-val	FDR q-val	FWER p-val	RANK AT MAX	LEADING EDGE		NAME	SIZE	ES	NES	NOM p-val	FDR q-val	FWER p-val	RANK AT MAX	LEADING EDGE		NAME	SIZE	ES	NES	NOM p-val	FDR q-val	FWER p-val	RANK AT MAX	LEADING EDGE
KEGG_CYTOKINE_CYTOKINE_RECEPTOR_INTERACTION	218	-0.313836	-5.34114	0	0	0	3876	tags=54%, list=23%, signal=70%		KEGG_HEMATOPOIETIC_CELL_LINEAGE	79	-0.46141	-4.90209	0	0	0	2484	tags=61%, list=15%, signal=71%		KEGG_OLFACTORY_TRANSDUCTION	106	-0.399332	-4.81858	0	0	0	1886	tags=51%, list=11%, signal=57%		KEGG_NEUROACTIVE_LIGAND_RECEPTOR_INTERACTION	189	-0.263246	-4.22904	0	0	0	6094	tags=62%, list=36%, signal=97%		KEGG_NEUROACTIVE_LIGAND_RECEPTOR_INTERACTION	189	-0.271819	-4.28799	0	0	0	8343	tags=77%, list=50%, signal=151%
KEGG_HEMATOPOIETIC_CELL_LINEAGE	79	-0.481343	-5.00321	0	0	0	4906	tags=77%, list=29%, signal=109%		KEGG_CYTOKINE_CYTOKINE_RECEPTOR_INTERACTION	218	-0.233237	-4.09174	0	0	0	3979	tags=47%, list=24%, signal=61%		KEGG_NEUROACTIVE_LIGAND_RECEPTOR_INTERACTION	189	-0.213094	-3.40454	0	0	0	4533	tags=48%, list=27%, signal=65%		KEGG_CYTOKINE_CYTOKINE_RECEPTOR_INTERACTION	218	-0.188447	-3.28235	0	0	0	9018	tags=72%, list=54%, signal=155%		KEGG_OLFACTORY_TRANSDUCTION	106	-0.261792	-3.17786	0	0	0	8752	tags=78%, list=52%, signal=163%
KEGG_CHEMOKINE_SIGNALING_PATHWAY	169	-0.27401	-4.24991	0	0	0	7246	tags=70%, list=43%, signal=123%		KEGG_NATURAL_KILLER_CELL_MEDIATED_CYTOTOXICITY	114	-0.289257	-3.59138	0	0	0	4295	tags=54%, list=26%, signal=73%		KEGG_TASTE_TRANSDUCTION	43	-0.399289	-3.09935	0	0	0	6958	tags=81%, list=42%, signal=139%		KEGG_HEMATOPOIETIC_CELL_LINEAGE	79	-0.308294	-3.23978	0	0	0	5670	tags=65%, list=34%, signal=97%		KEGG_TASTE_TRANSDUCTION	43	-0.408397	-3.15556	0	0	0	8752	tags=93%, list=52%, signal=194%
KEGG_ECM_RECEPTOR_INTERACTION	83	-0.339094	-3.57821	0	0	0	4436	tags=60%, list=27%, signal=82%		KEGG_CHEMOKINE_SIGNALING_PATHWAY	169	-0.224989	-3.39099	0	0	0	4295	tags=48%, list=26%, signal=64%		KEGG_CELL_CYCLE	124	0.352922	4.51635	0	0	0	3584	tags=56%, list=21%, signal=71%		KEGG_CALCIUM_SIGNALING_PATHWAY	153	-0.222825	-3.18267	0	0	0	7682	tags=68%, list=46%, signal=124%		KEGG_CALCIUM_SIGNALING_PATHWAY	153	-0.211888	-3.05426	0	0	0	9176	tags=76%, list=55%, signal=166%
KEGG_CELL_ADHESION_MOLECULES_CAMS	123	-0.260327	-3.37443	0	0	0	5745	tags=60%, list=34%, signal=91%		KEGG_LYSOSOME	119	-0.258718	-3.24297	0	0	0	8500	tags=76%, list=51%, signal=154%		KEGG_PROTEASOME	43	0.544537	4.26409	0	0	0	5699	tags=88%, list=34%, signal=134%		KEGG_ASTHMA	23	-0.43003	-2.52783	0	0.00207902	0.011	5184	tags=74%, list=31%, signal=107%		KEGG_BASAL_CELL_CARCINOMA	49	-0.353358	-2.95943	0	0	0	7425	tags=80%, list=44%, signal=143%
KEGG_REGULATION_OF_ACTIN_CYTOSKELETON	193	-0.204035	-3.2564	0	0	0	3823	tags=43%, list=23%, signal=55%		KEGG_ANTIGEN_PROCESSING_AND_PRESENTATION	67	-0.321698	-3.09132	0	0	0	6129	tags=69%, list=37%, signal=108%		KEGG_OXIDATIVE_PHOSPHORYLATION	120	0.314516	4.04939	0	0	0	7325	tags=75%, list=44%, signal=132%		KEGG_CELL_ADHESION_MOLECULES_CAMS	123	-0.191977	-2.50083	0	0.00252346	0.016	10010	tags=79%, list=60%, signal=195%		KEGG_OXIDATIVE_PHOSPHORYLATION	120	0.475694	6.1142	0	0	0	4089	tags=72%, list=24%, signal=94%
KEGG_FOCAL_ADHESION	193	-0.204838	-3.2427	0	0	0	4937	tags=50%, list=29%, signal=70%		KEGG_T_CELL_RECEPTOR_SIGNALING_PATHWAY	103	-0.257049	-3.08184	0	0	0	6937	tags=67%, list=41%, signal=114%		KEGG_OOCYTE_MEIOSIS	104	0.319236	3.93501	0	0	0	4023	tags=56%, list=24%, signal=73%		KEGG_GLYCINE_SERINE_AND_THREONINE_METABOLISM	28	-0.360879	-2.2913	0.00192308	0.00885012	0.061	5328	tags=68%, list=32%, signal=99%		KEGG_PARKINSONS_DISEASE	118	0.436762	5.56514	0	0	0	3520	tags=64%, list=21%, signal=81%
KEGG_ASTHMA	23	-0.521417	-3.00764	0	0	0	2929	tags=70%, list=18%, signal=84%		KEGG_B_CELL_RECEPTOR_SIGNALING_PATHWAY	74	-0.30587	-3.06958	0	0	0	8022	tags=78%, list=48%, signal=150%		KEGG_ALZHEIMERS_DISEASE	153	0.274764	3.90899	0	0	0	7475	tags=72%, list=45%, signal=129%		KEGG_MAPK_SIGNALING_PATHWAY	239	-0.123664	-2.16337	0	0.0203025	0.157	9375	tags=68%, list=56%, signal=153%		KEGG_PROTEASOME	43	0.692768	5.48403	0	0	0	4003	tags=93%, list=24%, signal=122%
KEGG_PRIMARY_IMMUNODEFICIENCY	34	-0.417386	-2.89908	0	0	0	3859	tags=65%, list=23%, signal=84%		KEGG_OLFACTORY_TRANSDUCTION	106	0.334895	4.0802	0	0	0	5166	tags=64%, list=31%, signal=92%		KEGG_DNA_REPLICATION	36	0.54157	3.86275	0	0	0	2577	tags=69%, list=15%, signal=82%		KEGG_CHEMOKINE_SIGNALING_PATHWAY	169	-0.137993	-2.06528	0.00766283	0.0326068	0.258	8212	tags=63%, list=49%, signal=122%		KEGG_ALZHEIMERS_DISEASE	153	0.368544	5.29745	0	0	0	4826	tags=65%, list=29%, signal=91%
KEGG_RIBOSOME	85	0.677007	7.41075	0	0	0	3887	tags=91%, list=23%, signal=117%		KEGG_FC_GAMMA_R_MEDIATED_PHAGOCYTOSIS	92	-0.2408	-2.76239	0	0.000133772	0.001	6726	tags=64%, list=40%, signal=107%		KEGG_RIBOSOME	85	0.348505	3.80826	0	0	0	9160	tags=89%, list=55%, signal=197%		KEGG_MELANOGENESIS	90	-0.180665	-2.03595	0.00578035	0.0352487	0.307	3874	tags=41%, list=23%, signal=53%		KEGG_HUNTINGTONS_DISEASE	168	0.347681	5.1118	0	0	0	4599	tags=62%, list=27%, signal=85%
KEGG_SPLICEOSOME	126	0.255313	3.34984	0	0	0	11166	tags=92%, list=67%, signal=275%		KEGG_LEISHMANIA_INFECTION	66	-0.294757	-2.78547	0	0.000145933	0.001	5484	tags=62%, list=33%, signal=92%		KEGG_HUNTINGTONS_DISEASE	168	0.251204	3.80561	0	0	0	7094	tags=67%, list=42%, signal=116%		KEGG_BASAL_CELL_CARCINOMA	49	-0.240252	-1.99118	0.00394477	0.0412265	0.374	6580	tags=63%, list=39%, signal=104%		KEGG_SPLICEOSOME	126	0.386018	5.03697	0	0	0	5940	tags=74%, list=35%, signal=114%
KEGG_PROTEIN_EXPORT	23	0.569138	3.26586	0	0	0	7223	tags=100%, list=43%, signal=176%		KEGG_LEUKOCYTE_TRANSENDOTHELIAL_MIGRATION	107	-0.238157	-2.92254	0	0.000160526	0.001	8710	tags=76%, list=52%, signal=157%		KEGG_PARKINSONS_DISEASE	118	0.293141	3.72778	0	0	0	7325	tags=73%, list=44%, signal=129%		KEGG_DILATED_CARDIOMYOPATHY	81	-0.178016	-1.87813	0.00961539	0.0733769	0.591	7367	tags=62%, list=44%, signal=110%		KEGG_RIBOSOME	85	0.441099	4.90125	0	0	0	8012	tags=92%, list=48%, signal=175%
KEGG_OLFACTORY_TRANSDUCTION	106	0.264828	3.21527	0	0	0	5226	tags=58%, list=31%, signal=83%		KEGG_PRIMARY_IMMUNODEFICIENCY	34	-0.432312	-2.93996	0	0.000178363	0.001	2133	tags=56%, list=13%, signal=64%		KEGG_SPLICEOSOME	126	0.273092	3.58161	0	0	0	8347	tags=77%, list=50%, signal=152%		KEGG_LEUKOCYTE_TRANSENDOTHELIAL_MIGRATION	107	-0.155845	-1.8719	0.0135922	0.069831	0.603	7889	tags=63%, list=47%, signal=118%		KEGG_CELL_CYCLE	124	0.369034	4.76045	0	0	0	4801	tags=65%, list=29%, signal=91%
KEGG_PROTEASOME	43	0.401108	3.04462	0	0	0	5758	tags=74%, list=34%, signal=113%		KEGG_CELL_ADHESION_MOLECULES_CAMS	123	-0.208878	-2.72773	0	0.000232605	0.002	5103	tags=51%, list=30%, signal=73%		KEGG_PYRIMIDINE_METABOLISM	96	0.28123	3.19435	0	0	0	7174	tags=71%, list=43%, signal=123%		KEGG_INTESTINAL_IMMUNE_NETWORK_FOR_IGA_PRODUCTION	41	-0.242278	-1.86272	0.0140562	0.0679722	0.621	10243	tags=85%, list=61%, signal=219%		KEGG_DNA_REPLICATION	36	0.581138	4.10877	0	0	0	2846	tags=75%, list=17%, signal=90%
KEGG_N_GLYCAN_BIOSYNTHESIS	46	0.380874	2.99334	0	0	0	4557	tags=65%, list=27%, signal=89%		KEGG_REGULATION_OF_ACTIN_CYTOSKELETON	193	-0.159521	-2.60399	0	0.000512705	0.005	8635	tags=67%, list=52%, signal=138%		KEGG_NATURAL_KILLER_CELL_MEDIATED_CYTOTOXICITY	114	0.226217	2.82668	0	9.02778e-05	0.001	8277	tags=72%, list=49%, signal=141%		KEGG_AUTOIMMUNE_THYROID_DISEASE	34	-0.261388	-1.83714	0.0155945	0.0736631	0.686	5480	tags=59%, list=33%, signal=87%		KEGG_RNA_DEGRADATION	53	0.472898	4.08368	0	0	0	6951	tags=89%, list=42%, signal=151%
KEGG_OXIDATIVE_PHOSPHORYLATION	120	0.224711	2.85705	0	9.7561e-05	0.001	7562	tags=68%, list=45%, signal=122%		KEGG_GRAFT_VERSUS_HOST_DISEASE	35	-0.358848	-2.52018	0	0.00153806	0.015	5484	tags=69%, list=33%, signal=102%		KEGG_PROGESTERONE_MEDIATED_OOCYTE_MATURATION	82	0.267052	2.83805	0	9.62963e-05	0.001	4940	tags=56%, list=30%, signal=79%		KEGG_ABC_TRANSPORTERS	40	-0.241219	-1.82603	0.0201207	0.0739675	0.711	4760	tags=52%, list=28%, signal=73%		KEGG_OOCYTE_MEIOSIS	104	0.330512	3.98947	0	0	0	4801	tags=62%, list=29%, signal=86%
KEGG_UBIQUITIN_MEDIATED_PROTEOLYSIS	131	0.216055	2.82388	0	0.000172866	0.002	9698	tags=79%, list=58%, signal=187%		KEGG_FOCAL_ADHESION	193	-0.152457	-2.4621	0	0.00170131	0.019	8405	tags=65%, list=50%, signal=130%		KEGG_CHEMOKINE_SIGNALING_PATHWAY	169	0.193059	2.88449	0	0.000103175	0.001	8189	tags=68%, list=49%, signal=132%		KEGG_ECM_RECEPTOR_INTERACTION	83	-0.171532	-1.80388	0.0249042	0.0788198	0.754	2992	tags=35%, list=18%, signal=42%		KEGG_UBIQUITIN_MEDIATED_PROTEOLYSIS	131	0.29452	3.95926	0	0	0	6351	tags=67%, list=38%, signal=107%
KEGG_HUNTINGTONS_DISEASE	168	0.183891	2.7258	0	0.000198508	0.003	8010	tags=66%, list=48%, signal=125%		KEGG_ASTHMA	23	-0.424369	-2.48444	0	0.00171577	0.018	2368	tags=57%, list=14%, signal=66%		KEGG_T_CELL_RECEPTOR_SIGNALING_PATHWAY	103	0.244748	2.88984	0	0.000111111	0.001	8277	tags=74%, list=49%, signal=145%		KEGG_TASTE_TRANSDUCTION	43	-0.218781	-1.73741	0.0270793	0.104023	0.865	9582	tags=79%, list=57%, signal=184%		KEGG_PEROXISOME	75	0.336999	3.4816	0	0	0	4649	tags=61%, list=28%, signal=85%
KEGG_RNA_DEGRADATION	53	0.32062	2.79681	0	0.000220564	0.003	10123	tags=92%, list=60%, signal=233%		KEGG_ENDOCYTOSIS	178	-0.154793	-2.45536	0	0.00178782	0.021	10225	tags=76%, list=61%, signal=194%		KEGG_UBIQUITIN_MEDIATED_PROTEOLYSIS	131	0.225477	2.97682	0	0.00012037	0.001	8264	tags=72%, list=49%, signal=141%		KEGG_PPAR_SIGNALING_PATHWAY	56	-0.193243	-1.71403	0.0164948	0.111134	0.894	6640	tags=59%, list=40%, signal=97%		KEGG_PYRIMIDINE_METABOLISM	96	0.297075	3.38113	0	0	0	6213	tags=67%, list=37%, signal=105%
KEGG_VASCULAR_SMOOTH_MUSCLE_CONTRACTION	99	-0.241635	-2.76559	0	0.000277092	0.002	6293	tags=62%, list=38%, signal=98%		KEGG_HUNTINGTONS_DISEASE	168	0.158234	2.35485	0	0.00519734	0.046	10029	tags=76%, list=60%, signal=187%		KEGG_RNA_DEGRADATION	53	0.314928	2.7427	0	0.000194211	0.002	7376	tags=75%, list=44%, signal=135%		KEGG_LEISHMANIA_INFECTION	66	-0.174929	-1.70787	0.0199601	0.109032	0.9	9003	tags=71%, list=54%, signal=154%		KEGG_VALINE_LEUCINE_AND_ISOLEUCINE_DEGRADATION	44	0.389256	3.11309	0	0	0	7575	tags=84%, list=45%, signal=153%
KEGG_NOD_LIKE_RECEPTOR_SIGNALING_PATHWAY	58	-0.312212	-2.78322	0	0.000304801	0.002	6336	tags=69%, list=38%, signal=111%		KEGG_RIBOSOME	85	0.224985	2.37891	0	0.0057067	0.04	8854	tags=75%, list=53%, signal=159%		KEGG_NUCLEOTIDE_EXCISION_REPAIR	44	0.333998	2.61527	0	0.000449008	0.005	8117	tags=82%, list=49%, signal=158%		KEGG_ENDOCYTOSIS	178	-0.107615	-1.66999	0.0451128	0.125384	0.931	6117	tags=47%, list=37%, signal=74%		KEGG_CITRATE_CYCLE_TCA_CYCLE	30	0.467409	2.96673	0	0	0	6695	tags=87%, list=40%, signal=144%
KEGG_FC_GAMMA_R_MEDIATED_PHAGOCYTOSIS	92	-0.241074	-2.7295	0	0.000357481	0.003	3447	tags=45%, list=21%, signal=56%		KEGG_PARKINSONS_DISEASE	118	0.190461	2.4056	0	0.00615959	0.033	9315	tags=75%, list=56%, signal=167%		KEGG_AMINO_SUGAR_AND_NUCLEOTIDE_SUGAR_METABOLISM	41	0.3391	2.60064	0	0.000511985	0.006	5359	tags=66%, list=32%, signal=97%		KEGG_ALLOGRAFT_REJECTION	31	-0.257387	-1.65834	0.0237154	0.126403	0.942	9738	tags=84%, list=58%, signal=200%		KEGG_NUCLEOTIDE_EXCISION_REPAIR	44	0.373756	2.90919	0	0	0	7073	tags=80%, list=42%, signal=137%
KEGG_SYSTEMIC_LUPUS_ERYTHEMATOSUS	52	-0.316171	-2.6996	0	0.000442869	0.004	3094	tags=50%, list=18%, signal=61%		KEGG_OXIDATIVE_PHOSPHORYLATION	120	0.187253	2.41451	0	0.00836918	0.03	11950	tags=90%, list=71%, signal=312%		KEGG_BASAL_CELL_CARCINOMA	49	-0.322418	-2.69162	0	0.000562129	0.005	5892	tags=67%, list=35%, signal=104%		KEGG_GRAFT_VERSUS_HOST_DISEASE	35	-0.226022	-1.62004	0.0418327	0.145997	0.968	9615	tags=80%, list=57%, signal=188%		KEGG_MISMATCH_REPAIR	23	0.452649	2.61035	0	0.000442763	0.006	2621	tags=61%, list=16%, signal=72%
KEGG_LEUKOCYTE_TRANSENDOTHELIAL_MIGRATION	107	-0.220283	-2.61005	0	0.000652175	0.007	5879	tags=57%, list=35%, signal=87%		KEGG_PANCREATIC_CANCER	70	-0.21695	-2.21191	0.0018797	0.00897063	0.114	6666	tags=61%, list=40%, signal=102%		KEGG_NOD_LIKE_RECEPTOR_SIGNALING_PATHWAY	58	0.286328	2.58632	0	0.000636056	0.008	8497	tags=79%, list=51%, signal=161%		KEGG_TYPE_I_DIABETES_MELLITUS	36	-0.22998	-1.60488	0.0550285	0.148776	0.978	10107	tags=83%, list=60%, signal=210%		KEGG_ECM_RECEPTOR_INTERACTION	83	-0.245762	-2.61588	0	0.000537972	0.005	7805	tags=71%, list=47%, signal=133%
KEGG_PARKINSONS_DISEASE	118	0.202047	2.53713	0	0.000668883	0.011	7846	tags=67%, list=47%, signal=125%		KEGG_FC_EPSILON_RI_SIGNALING_PATHWAY	69	-0.222736	-2.14736	0.00204918	0.0127332	0.166	7446	tags=67%, list=44%, signal=120%		KEGG_LINOLEIC_ACID_METABOLISM	21	-0.459066	-2.56041	0	0.000833738	0.009	4282	tags=71%, list=26%, signal=96%		KEGG_ADIPOCYTOKINE_SIGNALING_PATHWAY	61	-0.173542	-1.60386	0.0363636	0.143425	0.978	5338	tags=49%, list=32%, signal=72%		KEGG_BASE_EXCISION_REPAIR	33	0.383428	2.57288	0	0.000564688	0.008	8302	tags=88%, list=50%, signal=174%
KEGG_COMPLEMENT_AND_COAGULATION_CASCADES	62	-0.282739	-2.61343	0	0.000698759	0.007	2035	tags=40%, list=12%, signal=46%		KEGG_PATHWAYS_IN_CANCER	306	-0.106752	-2.12815	0.00395257	0.0135226	0.183	8584	tags=62%, list=51%, signal=124%		KEGG_VALINE_LEUCINE_AND_ISOLEUCINE_DEGRADATION	44	0.317643	2.54666	0	0.000909954	0.012	8390	tags=82%, list=50%, signal=164%		KEGG_VASCULAR_SMOOTH_MUSCLE_CONTRACTION	99	-0.13416	-1.573	0.0543478	0.156608	0.986	4531	tags=40%, list=27%, signal=55%		KEGG_PATHOGENIC_ESCHERICHIA_COLI_INFECTION	54	0.28577	2.49851	0	0.000855902	0.014	2670	tags=44%, list=16%, signal=53%
KEGG_GRAFT_VERSUS_HOST_DISEASE	35	-0.374457	-2.55907	0	0.000946663	0.011	7136	tags=80%, list=43%, signal=139%		KEGG_TYPE_I_DIABETES_MELLITUS	36	-0.297538	-2.09298	0.00195695	0.0144653	0.218	3865	tags=53%, list=23%, signal=68%		KEGG_CITRATE_CYCLE_TCA_CYCLE	30	0.390407	2.48156	0	0.000999216	0.014	9655	tags=97%, list=58%, signal=228%		KEGG_HEDGEHOG_SIGNALING_PATHWAY	49	-0.189616	-1.56892	0.0510638	0.153084	0.989	4351	tags=45%, list=26%, signal=60%		KEGG_PENTOSE_PHOSPHATE_PATHWAY	25	0.420157	2.51169	0	0.000896659	0.014	7036	tags=84%, list=42%, signal=145%
KEGG_ENDOCYTOSIS	178	-0.162146	-2.52223	0	0.0012741	0.016	9069	tags=70%, list=54%, signal=152%		KEGG_ALLOGRAFT_REJECTION	31	-0.318133	-2.10931	0.00215517	0.0145055	0.2	5484	tags=65%, list=33%, signal=96%		KEGG_PENTOSE_PHOSPHATE_PATHWAY	25	0.403004	2.44117	0	0.00104153	0.016	3306	tags=60%, list=20%, signal=75%		KEGG_PRIMARY_IMMUNODEFICIENCY	34	-0.218163	-1.52416	0.0589354	0.180114	0.997	4233	tags=47%, list=25%, signal=63%		KEGG_CELL_ADHESION_MOLECULES_CAMS	123	-0.195172	-2.51847	0	0.00092887	0.01	8052	tags=67%, list=48%, signal=129%
KEGG_RNA_POLYMERASE	28	0.388026	2.41085	0	0.00170002	0.031	7861	tags=86%, list=47%, signal=161%		KEGG_PHOSPHATIDYLINOSITOL_SIGNALING_SYSTEM	72	-0.208873	-2.08019	0.00203252	0.0146462	0.247	6283	tags=58%, list=38%, signal=93%		KEGG_PEROXISOME	75	0.246114	2.44144	0	0.00108681	0.016	8841	tags=77%, list=53%, signal=163%		KEGG_ARACHIDONIC_ACID_METABOLISM	43	-0.191878	-1.51805	0.0674603	0.178919	0.997	6139	tags=56%, list=37%, signal=88%		KEGG_BASAL_TRANSCRIPTION_FACTORS	33	0.365149	2.52618	0.00198413	0.000941492	0.014	7593	tags=82%, list=45%, signal=149%
KEGG_ALLOGRAFT_REJECTION	31	-0.365836	-2.43987	0	0.00176397	0.025	5227	tags=68%, list=31%, signal=98%		KEGG_ADHERENS_JUNCTION	73	-0.205703	-2.08227	0.00396825	0.0149896	0.243	5056	tags=51%, list=30%, signal=72%		KEGG_LYSOSOME	119	0.185323	2.40778	0	0.00164044	0.025	11124	tags=85%, list=66%, signal=251%		KEGG_NICOTINATE_AND_NICOTINAMIDE_METABOLISM	23	-0.257386	-1.48225	0.0865191	0.204704	0.998	10980	tags=91%, list=66%, signal=265%		KEGG_LYSOSOME	119	0.194149	2.45264	0	0.0013562	0.023	7602	tags=65%, list=45%, signal=118%
KEGG_ALZHEIMERS_DISEASE	153	0.163978	2.37047	0	0.00184059	0.036	7562	tags=61%, list=45%, signal=111%		KEGG_PPAR_SIGNALING_PATHWAY	56	-0.236374	-2.08573	0.00194175	0.0150177	0.233	2932	tags=41%, list=18%, signal=50%		KEGG_HOMOLOGOUS_RECOMBINATION	28	0.371328	2.36959	0	0.00243408	0.038	8140	tags=86%, list=49%, signal=167%		KEGG_B_CELL_RECEPTOR_SIGNALING_PATHWAY	74	-0.147875	-1.45836	0.0882353	0.220531	0.999	2965	tags=32%, list=18%, signal=39%		KEGG_RNA_POLYMERASE	28	0.38659	2.41077	0	0.00175631	0.031	7885	tags=86%, list=47%, signal=162%
KEGG_GAP_JUNCTION	85	-0.224904	-2.40842	0	0.00185491	0.029	3935	tags=46%, list=24%, signal=60%		KEGG_EPITHELIAL_CELL_SIGNALING_IN_HELICOBACTER_PYLORI_INFECTION	66	-0.219983	-2.09607	0	0.0150311	0.217	11802	tags=92%, list=71%, signal=312%		KEGG_PURINE_METABOLISM	151	0.16051	2.3321	0.00196078	0.00283777	0.047	3322	tags=36%, list=20%, signal=44%		KEGG_PATHWAYS_IN_CANCER	306	-0.0709144	-1.44268	0.0957031	0.227777	1	3977	tags=31%, list=24%, signal=40%		KEGG_NEUROTROPHIN_SIGNALING_PATHWAY	120	0.179903	2.32371	0	0.00324114	0.058	6354	tags=56%, list=38%, signal=89%
KEGG_DNA_REPLICATION	36	-0.341603	-2.44471	0	0.00186197	0.025	7778	tags=81%, list=46%, signal=150%		KEGG_GLYCEROPHOSPHOLIPID_METABOLISM	68	-0.211458	-2.05222	0.00607287	0.0165847	0.277	6075	tags=57%, list=36%, signal=90%		KEGG_PORPHYRIN_AND_CHLOROPHYLL_METABOLISM	28	0.377339	2.33326	0	0.00294287	0.047	5051	tags=68%, list=30%, signal=97%		KEGG_SYSTEMIC_LUPUS_ERYTHEMATOSUS	52	-0.155852	-1.36757	0.126482	0.303736	1	3194	tags=35%, list=19%, signal=43%		KEGG_GLUTATHIONE_METABOLISM	41	0.304252	2.29901	0	0.00368703	0.068	4308	tags=56%, list=26%, signal=75%
KEGG_INTESTINAL_IMMUNE_NETWORK_FOR_IGA_PRODUCTION	41	-0.317453	-2.42296	0	0.00187703	0.028	4906	tags=61%, list=29%, signal=86%		KEGG_TYPE_II_DIABETES_MELLITUS	42	-0.270268	-2.03637	0.00391389	0.0184489	0.313	6248	tags=64%, list=37%, signal=102%		KEGG_PATHOGENIC_ESCHERICHIA_COLI_INFECTION	54	0.2614	2.26318	0	0.00430717	0.074	1217	tags=33%, list=7%, signal=36%		KEGG_NITROGEN_METABOLISM	20	-0.251017	-1.35704	0.0975104	0.308114	1	8357	tags=75%, list=50%, signal=150%		KEGG_INSULIN_SIGNALING_PATHWAY	124	0.176676	2.26558	0	0.00444729	0.084	9886	tags=77%, list=59%, signal=186%
KEGG_ARRHYTHMOGENIC_RIGHT_VENTRICULAR_CARDIOMYOPATHY_ARVC	69	-0.237267	-2.34727	0	0.00280382	0.048	8174	tags=72%, list=49%, signal=141%		KEGG_ERBB_SIGNALING_PATHWAY	84	-0.185938	-1.97202	0.00598802	0.025422	0.416	5472	tags=51%, list=33%, signal=76%		KEGG_REGULATION_OF_ACTIN_CYTOSKELETON	193	0.140617	2.25544	0	0.0043094	0.077	8252	tags=63%, list=49%, signal=123%		KEGG_AXON_GUIDANCE	124	-0.10085	-1.31919	0.152778	0.347207	1	9528	tags=67%, list=57%, signal=154%		KEGG_CYTOKINE_CYTOKINE_RECEPTOR_INTERACTION	218	-0.139139	-2.33146	0	0.00445043	0.054	9986	tags=73%, list=60%, signal=180%
KEGG_TYPE_I_DIABETES_MELLITUS	36	-0.327332	-2.34815	0	0.00293126	0.048	5227	tags=64%, list=31%, signal=93%		KEGG_SYSTEMIC_LUPUS_ERYTHEMATOSUS	52	-0.22821	-1.95684	0.00587084	0.0272862	0.451	7780	tags=69%, list=46%, signal=129%		KEGG_SYSTEMIC_LUPUS_ERYTHEMATOSUS	52	0.264182	2.22293	0.00398406	0.005187	0.096	2672	tags=42%, list=16%, signal=50%		KEGG_GAP_JUNCTION	85	-0.120956	-1.31238	0.167364	0.346141	1	3500	tags=33%, list=21%, signal=41%		KEGG_AMINOACYL_TRNA_BIOSYNTHESIS	22	0.400998	2.24131	0.00204082	0.00468458	0.091	9272	tags=95%, list=55%, signal=214%
KEGG_AUTOIMMUNE_THYROID_DISEASE	34	-0.335479	-2.30468	0	0.00336352	0.059	5227	tags=65%, list=31%, signal=94%		KEGG_NEUROTROPHIN_SIGNALING_PATHWAY	120	-0.153398	-1.95021	0.00575816	0.0273236	0.464	10562	tags=78%, list=63%, signal=211%		KEGG_AMINOACYL_TRNA_BIOSYNTHESIS	22	0.395537	2.20526	0.00220751	0.00569626	0.108	10124	tags=100%, list=60%, signal=253%		KEGG_BETA_ALANINE_METABOLISM	21	-0.235329	-1.30512	0.146771	0.346506	1	4037	tags=48%, list=24%, signal=63%		KEGG_APOPTOSIS	84	0.206791	2.19801	0	0.0058219	0.113	9506	tags=77%, list=57%, signal=178%
KEGG_HYPERTROPHIC_CARDIOMYOPATHY_HCM	74	-0.219217	-2.28399	0	0.00400063	0.076	8335	tags=72%, list=50%, signal=142%		KEGG_RENAL_CELL_CARCINOMA	70	-0.201227	-1.93984	0.00924214	0.0282505	0.483	12427	tags=94%, list=74%, signal=365%		KEGG_EPITHELIAL_CELL_SIGNALING_IN_HELICOBACTER_PYLORI_INFECTION	66	0.228438	2.1764	0.00198413	0.00687171	0.134	8109	tags=71%, list=48%, signal=138%		KEGG_PANTOTHENATE_AND_COA_BIOSYNTHESIS	16	-0.268301	-1.28918	0.156977	0.357929	1	7021	tags=69%, list=42%, signal=118%		KEGG_HOMOLOGOUS_RECOMBINATION	28	0.350106	2.18563	0	0.00608235	0.122	5506	tags=68%, list=33%, signal=101%
KEGG_DILATED_CARDIOMYOPATHY	81	-0.218296	-2.28815	0	0.00404694	0.074	7316	tags=65%, list=44%, signal=116%		KEGG_PROSTATE_CANCER	86	-0.182073	-1.92013	0.00833333	0.0308539	0.524	10008	tags=78%, list=60%, signal=193%		KEGG_MISMATCH_REPAIR	23	0.381825	2.16289	0.00394477	0.00756212	0.151	5260	tags=70%, list=31%, signal=101%		KEGG_FOCAL_ADHESION	193	-0.0815733	-1.28166	0.179641	0.359254	1	3074	tags=26%, list=18%, signal=32%		KEGG_PROGESTERONE_MEDIATED_OOCYTE_MATURATION	82	0.202733	2.16277	0.00590551	0.00650593	0.134	3562	tags=41%, list=21%, signal=52%
KEGG_PATHWAYS_IN_CANCER	306	-0.114621	-2.27056	0.00203666	0.00415295	0.081	4845	tags=40%, list=29%, signal=56%		KEGG_INSULIN_SIGNALING_PATHWAY	124	-0.148831	-1.9136	0.00770713	0.0309541	0.534	12645	tags=90%, list=76%, signal=367%		KEGG_B_CELL_RECEPTOR_SIGNALING_PATHWAY	74	0.206354	2.14029	0.00194553	0.00860961	0.179	8095	tags=69%, list=48%, signal=133%		KEGG_COMPLEMENT_AND_COAGULATION_CASCADES	62	-0.140804	-1.28153	0.173745	0.350448	1	11150	tags=81%, list=67%, signal=241%		KEGG_LINOLEIC_ACID_METABOLISM	21	-0.403669	-2.23027	0.00205339	0.00724165	0.095	4411	tags=67%, list=26%, signal=90%
KEGG_NEUROACTIVE_LIGAND_RECEPTOR_INTERACTION	189	-0.143054	-2.23398	0	0.00492068	0.097	4895	tags=43%, list=29%, signal=61%		KEGG_WNT_SIGNALING_PATHWAY	139	-0.137043	-1.89547	0.00571429	0.031725	0.568	10730	tags=78%, list=64%, signal=215%		KEGG_FC_GAMMA_R_MEDIATED_PHAGOCYTOSIS	92	0.18937	2.10108	0.00592885	0.0107153	0.225	3396	tags=39%, list=20%, signal=49%		KEGG_NOD_LIKE_RECEPTOR_SIGNALING_PATHWAY	58	-0.140439	-1.27829	0.175403	0.346004	1	4584	tags=41%, list=27%, signal=57%		KEGG_AMINO_SUGAR_AND_NUCLEOTIDE_SUGAR_METABOLISM	41	0.269879	2.10589	0.00622407	0.00944549	0.198	9372	tags=83%, list=56%, signal=188%
KEGG_LEISHMANIA_INFECTION	66	-0.23005	-2.18575	0	0.00621156	0.124	984	tags=29%, list=6%, signal=30%		KEGG_NOD_LIKE_RECEPTOR_SIGNALING_PATHWAY	58	-0.212952	-1.90167	0.00412371	0.0318851	0.56	8280	tags=71%, list=49%, signal=139%		KEGG_BASE_EXCISION_REPAIR	33	0.30838	2.09399	0.00215983	0.0109116	0.234	4484	tags=58%, list=27%, signal=78%		KEGG_GLYCEROLIPID_METABOLISM	43	-0.164855	-1.27819	0.157685	0.337834	1	2698	tags=33%, list=16%, signal=39%		KEGG_MELANOGENESIS	90	-0.19551	-2.16631	0.00414079	0.0103301	0.15	7346	tags=63%, list=44%, signal=112%
KEGG_DORSO_VENTRAL_AXIS_FORMATION	21	-0.398749	-2.18019	0.00206186	0.00621814	0.129	8478	tags=90%, list=51%, signal=183%		KEGG_COMPLEMENT_AND_COAGULATION_CASCADES	62	-0.19716	-1.86884	0.0141129	0.0358078	0.618	3192	tags=39%, list=19%, signal=48%		KEGG_RETINOL_METABOLISM	39	-0.295949	-2.18365	0.00210084	0.0110065	0.137	6646	tags=69%, list=40%, signal=115%		KEGG_HYPERTROPHIC_CARDIOMYOPATHY_HCM	74	-0.126744	-1.27296	0.179389	0.336874	1	7388	tags=57%, list=44%, signal=101%		KEGG_PURINE_METABOLISM	151	0.145808	2.04997	0.00567108	0.0126453	0.268	3455	tags=35%, list=21%, signal=44%
KEGG_MAPK_SIGNALING_PATHWAY	239	-0.121377	-2.15749	0.00201613	0.00717085	0.147	7382	tags=56%, list=44%, signal=99%		KEGG_NEUROACTIVE_LIGAND_RECEPTOR_INTERACTION	189	0.125338	2.02892	0.00406504	0.0383816	0.336	2264	tags=26%, list=14%, signal=30%		KEGG_PANCREATIC_CANCER	70	0.21188	2.06321	0.00189036	0.0125742	0.274	8183	tags=70%, list=49%, signal=136%		KEGG_GNRH_SIGNALING_PATHWAY	87	-0.115558	-1.26466	0.173278	0.339197	1	3271	tags=31%, list=20%, signal=38%		KEGG_NATURAL_KILLER_CELL_MEDIATED_CYTOTOXICITY	114	0.163749	2.03271	0.00580271	0.0141572	0.302	6526	tags=55%, list=39%, signal=90%
KEGG_CALCIUM_SIGNALING_PATHWAY	153	-0.143494	-2.13251	0.00201613	0.00801334	0.165	8560	tags=65%, list=51%, signal=133%		KEGG_DORSO_VENTRAL_AXIS_FORMATION	21	-0.334157	-1.83115	0.0208729	0.0407413	0.697	3979	tags=57%, list=24%, signal=75%		KEGG_BASAL_TRANSCRIPTION_FACTORS	33	0.295683	2.02489	0.00581395	0.0146429	0.32	7739	tags=76%, list=46%, signal=141%		KEGG_ALDOSTERONE_REGULATED_SODIUM_REABSORPTION	38	-0.171905	-1.26009	0.189362	0.337315	1	2856	tags=34%, list=17%, signal=41%		KEGG_GLYCOSYLPHOSPHATIDYLINOSITOL_GPI_ANCHOR_BIOSYNTHESIS	25	0.330814	1.99329	0.00205339	0.0177423	0.375	8529	tags=84%, list=51%, signal=171%
KEGG_GLYCOSYLPHOSPHATIDYLINOSITOL_GPI_ANCHOR_BIOSYNTHESIS	25	0.359354	2.11386	0.00192308	0.00951296	0.185	3366	tags=56%, list=20%, signal=70%		KEGG_INTESTINAL_IMMUNE_NETWORK_FOR_IGA_PRODUCTION	41	-0.247385	-1.83274	0.0125261	0.0415785	0.695	4443	tags=51%, list=27%, signal=70%		KEGG_GLYCOLYSIS_GLUCONEOGENESIS	55	0.230124	2.02588	0.00806452	0.0149434	0.318	3159	tags=42%, list=19%, signal=51%		KEGG_JAK_STAT_SIGNALING_PATHWAY	123	-0.0953891	-1.2431	0.197211	0.350999	1	12431	tags=84%, list=74%, signal=323%		KEGG_HEDGEHOG_SIGNALING_PATHWAY	49	-0.243665	-2.03774	0.00409836	0.0210612	0.306	9597	tags=82%, list=57%, signal=191%
KEGG_PATHOGENIC_ESCHERICHIA_COLI_INFECTION	54	-0.241191	-2.06325	0.00204499	0.0113968	0.239	6205	tags=61%, list=37%, signal=97%		KEGG_TOLL_LIKE_RECEPTOR_SIGNALING_PATHWAY	90	-0.165413	-1.83432	0.0134357	0.0422997	0.691	7847	tags=63%, list=47%, signal=119%		KEGG_PRIMARY_IMMUNODEFICIENCY	34	0.279988	1.96855	0.00592885	0.0197509	0.417	8613	tags=79%, list=51%, signal=163%		KEGG_TIGHT_JUNCTION	120	-0.0935724	-1.18797	0.230769	0.418422	1	3467	tags=30%, list=21%, signal=38%		KEGG_DILATED_CARDIOMYOPATHY	81	-0.188275	-1.96709	0.00413223	0.0290327	0.422	7816	tags=65%, list=47%, signal=122%
KEGG_ADHERENS_JUNCTION	73	-0.203307	-2.0535	0	0.0117068	0.253	6930	tags=62%, list=41%, signal=105%		KEGG_BIOSYNTHESIS_OF_UNSATURATED_FATTY_ACIDS	21	-0.331815	-1.81582	0.0187891	0.0436821	0.719	6409	tags=71%, list=38%, signal=116%		KEGG_INSULIN_SIGNALING_PATHWAY	124	0.151113	1.95984	0.00980392	0.0207054	0.439	8826	tags=68%, list=53%, signal=142%		KEGG_OLFACTORY_TRANSDUCTION	106	-0.0970421	-1.15407	0.265896	0.461427	1	4229	tags=35%, list=25%, signal=46%		KEGG_PANCREATIC_CANCER	70	0.191265	1.89834	0.0177866	0.0299153	0.548	9722	tags=77%, list=58%, signal=183%
KEGG_CITRATE_CYCLE_TCA_CYCLE	30	0.310894	2.032	0.00604839	0.0144831	0.278	8194	tags=80%, list=49%, signal=156%		KEGG_LINOLEIC_ACID_METABOLISM	21	0.355395	1.93819	0.0124481	0.0455252	0.481	3622	tags=57%, list=22%, signal=73%		KEGG_APOPTOSIS	84	0.182206	1.94927	0.00397614	0.021608	0.46	12107	tags=90%, list=72%, signal=325%		KEGG_DORSO_VENTRAL_AXIS_FORMATION	21	-0.20339	-1.13851	0.280392	0.475358	1	2180	tags=33%, list=13%, signal=38%		KEGG_CHRONIC_MYELOID_LEUKEMIA	71	0.189229	1.88185	0.0103734	0.0320383	0.583	9810	tags=77%, list=59%, signal=186%
KEGG_PPAR_SIGNALING_PATHWAY	56	-0.22625	-2.00433	0.002	0.0148979	0.318	11170	tags=89%, list=67%, signal=268%		KEGG_AUTOIMMUNE_THYROID_DISEASE	34	-0.261149	-1.79675	0.0243408	0.047123	0.758	5484	tags=59%, list=33%, signal=87%		KEGG_NEUROTROPHIN_SIGNALING_PATHWAY	120	0.147256	1.91202	0.00959693	0.0252417	0.526	6757	tags=55%, list=40%, signal=92%		KEGG_ARRHYTHMOGENIC_RIGHT_VENTRICULAR_CARDIOMYOPATHY_ARVC	69	-0.117213	-1.13177	0.305785	0.476641	1	12843	tags=88%, list=77%, signal=378%		KEGG_FATTY_ACID_METABOLISM	39	0.24856	1.86068	0.0248963	0.0340597	0.628	6577	tags=64%, list=39%, signal=105%
KEGG_AMINOACYL_TRNA_BIOSYNTHESIS	22	0.359269	1.99624	0.00417537	0.0168489	0.338	8448	tags=86%, list=50%, signal=174%		KEGG_HOMOLOGOUS_RECOMBINATION	28	0.29948	1.90464	0.00583658	0.048125	0.544	8145	tags=79%, list=49%, signal=153%		KEGG_P53_SIGNALING_PATHWAY	66	0.195808	1.89322	0.010142	0.0276662	0.57	3835	tags=42%, list=23%, signal=55%		KEGG_WNT_SIGNALING_PATHWAY	139	-0.0820933	-1.12939	0.268191	0.471052	1	2973	tags=26%, list=18%, signal=31%		KEGG_EPITHELIAL_CELL_SIGNALING_IN_HELICOBACTER_PYLORI_INFECTION	66	0.192402	1.86091	0.00421941	0.0349187	0.628	7949	tags=67%, list=47%, signal=126%
KEGG_SMALL_CELL_LUNG_CANCER	83	-0.172571	-1.82947	0.0133843	0.0423938	0.679	5596	tags=51%, list=33%, signal=76%		KEGG_SPLICEOSOME	126	0.149589	1.94801	0.00849257	0.049131	0.462	11461	tags=83%, list=68%, signal=262%		KEGG_ADIPOCYTOKINE_SIGNALING_PATHWAY	61	0.205728	1.87192	0.00842105	0.0304155	0.611	8366	tags=70%, list=50%, signal=140%		KEGG_PHOSPHATIDYLINOSITOL_SIGNALING_SYSTEM	72	-0.115005	-1.12316	0.312992	0.471	1	8777	tags=64%, list=52%, signal=134%		KEGG_GLYCINE_SERINE_AND_THREONINE_METABOLISM	28	-0.309364	-1.90535	0.00767754	0.03768	0.532	5591	tags=64%, list=33%, signal=96%
KEGG_VIRAL_MYOCARDITIS	65	-0.196193	-1.79556	0.01	0.049878	0.749	5227	tags=51%, list=31%, signal=74%		KEGG_GLYCEROLIPID_METABOLISM	43	-0.230076	-1.77194	0.0184049	0.0525724	0.806	6669	tags=63%, list=40%, signal=104%		KEGG_ECM_RECEPTOR_INTERACTION	83	-0.191739	-1.96794	0.00414938	0.0305486	0.408	8503	tags=70%, list=51%, signal=141%		KEGG_HISTIDINE_METABOLISM	27	-0.177857	-1.09775	0.323887	0.50197	1	1988	tags=30%, list=12%, signal=34%		KEGG_PORPHYRIN_AND_CHLOROPHYLL_METABOLISM	28	0.28639	1.80286	0.0158416	0.0455372	0.743	7766	tags=75%, list=46%, signal=140%
KEGG_GLYCEROLIPID_METABOLISM	43	-0.232948	-1.77312	0.0235546	0.0546654	0.797	4675	tags=51%, list=28%, signal=71%		KEGG_ENDOMETRIAL_CANCER	52	-0.201575	-1.73448	0.0240481	0.0608591	0.864	6937	tags=62%, list=41%, signal=105%		KEGG_GLUTATHIONE_METABOLISM	41	0.245755	1.84564	0.00610998	0.0334177	0.664	6101	tags=61%, list=36%, signal=96%		KEGG_TYPE_II_DIABETES_MELLITUS	42	-0.140481	-1.07573	0.346154	0.527313	1	11204	tags=81%, list=67%, signal=244%		KEGG_BUTANOATE_METABOLISM	31	0.264601	1.7873	0.0244898	0.047583	0.768	7456	tags=71%, list=45%, signal=128%
KEGG_TOLL_LIKE_RECEPTOR_SIGNALING_PATHWAY	90	-0.158733	-1.75557	0.0218688	0.0583869	0.826	4611	tags=43%, list=28%, signal=59%		KEGG_TIGHT_JUNCTION	120	-0.134609	-1.73533	0.0258964	0.0619484	0.864	5435	tags=46%, list=32%, signal=67%		KEGG_GLYCOSYLPHOSPHATIDYLINOSITOL_GPI_ANCHOR_BIOSYNTHESIS	25	0.30723	1.84565	0.00978474	0.0341287	0.664	10262	tags=92%, list=61%, signal=237%		KEGG_GLYCOSPHINGOLIPID_BIOSYNTHESIS_LACTO_AND_NEOLACTO_SERIES	22	-0.186023	-1.06094	0.347656	0.542423	1	7542	tags=64%, list=45%, signal=116%		KEGG_ONE_CARBON_POOL_BY_FOLATE	17	0.361519	1.77464	0.0236686	0.0482657	0.795	2815	tags=53%, list=17%, signal=64%
KEGG_BASAL_TRANSCRIPTION_FACTORS	33	0.262219	1.76718	0.0142857	0.062625	0.803	11848	tags=97%, list=71%, signal=331%		KEGG_JAK_STAT_SIGNALING_PATHWAY	123	-0.132632	-1.72098	0.0252427	0.0627053	0.88	7050	tags=55%, list=42%, signal=95%		KEGG_HEDGEHOG_SIGNALING_PATHWAY	49	-0.238068	-1.97119	0.008	0.0342457	0.403	6958	tags=65%, list=42%, signal=111%		KEGG_PORPHYRIN_AND_CHLOROPHYLL_METABOLISM	28	-0.162719	-1.04721	0.374477	0.555612	1	10432	tags=79%, list=62%, signal=208%		KEGG_GLYCOLYSIS_GLUCONEOGENESIS	55	0.201948	1.77745	0.0176817	0.0485212	0.79	3629	tags=42%, list=22%, signal=53%
KEGG_AXON_GUIDANCE	124	-0.135627	-1.73751	0.026749	0.0629863	0.855	5981	tags=49%, list=36%, signal=76%		KEGG_COLORECTAL_CANCER	62	-0.184566	-1.64607	0.033264	0.0892888	0.96	11770	tags=89%, list=70%, signal=298%		KEGG_DRUG_METABOLISM_CYTOCHROME_P450	50	-0.23272	-1.92124	0.00816326	0.0360122	0.507	5490	tags=56%, list=33%, signal=83%		KEGG_GLYCOSAMINOGLYCAN_BIOSYNTHESIS_HEPARAN_SULFATE	21	-0.181853	-1.0323	0.391137	0.571751	1	2540	tags=33%, list=15%, signal=39%		KEGG_CARDIAC_MUSCLE_CONTRACTION	63	0.187706	1.76821	0.0141988	0.0488702	0.803	3245	tags=38%, list=19%, signal=47%
KEGG_GLUTATHIONE_METABOLISM	41	-0.227316	-1.71504	0.024952	0.0669022	0.885	8860	tags=76%, list=53%, signal=160%		KEGG_DNA_REPLICATION	36	0.247918	1.73973	0.0239044	0.0929986	0.849	11665	tags=94%, list=70%, signal=311%		KEGG_STEROID_HORMONE_BIOSYNTHESIS	35	-0.263243	-1.85597	0.0144033	0.0424226	0.628	5168	tags=57%, list=31%, signal=82%		KEGG_GLYCEROPHOSPHOLIPID_METABOLISM	68	-0.107571	-1.03165	0.403509	0.56318	1	10760	tags=75%, list=64%, signal=209%		KEGG_T_CELL_RECEPTOR_SIGNALING_PATHWAY	103	0.148365	1.77937	0.0240296	0.048997	0.788	5818	tags=50%, list=35%, signal=75%
KEGG_ADIPOCYTOKINE_SIGNALING_PATHWAY	61	-0.189571	-1.71785	0.023622	0.0675164	0.882	4522	tags=46%, list=27%, signal=63%		KEGG_RETINOL_METABOLISM	39	0.243259	1.76051	0.026694	0.0930225	0.816	4949	tags=54%, list=30%, signal=76%		KEGG_MELANOGENESIS	90	-0.165659	-1.87161	0.0077821	0.0430262	0.598	7471	tags=61%, list=45%, signal=110%		KEGG_PROXIMAL_TUBULE_BICARBONATE_RECLAMATION	22	-0.179316	-1.02314	0.412134	0.568616	1	2329	tags=32%, list=14%, signal=37%		KEGG_CYTOSOLIC_DNA_SENSING_PATHWAY	42	0.227906	1.71914	0.016	0.0607603	0.875	10141	tags=83%, list=61%, signal=211%
KEGG_GLYOXYLATE_AND_DICARBOXYLATE_METABOLISM	15	0.368164	1.70861	0.0324544	0.0784525	0.869	6116	tags=73%, list=37%, signal=115%		KEGG_ETHER_LIPID_METABOLISM	26	-0.273314	-1.63162	0.0629771	0.0936087	0.969	5733	tags=62%, list=34%, signal=93%		KEGG_CHRONIC_MYELOID_LEUKEMIA	71	0.181622	1.78265	0.0191939	0.0459599	0.788	6401	tags=56%, list=38%, signal=91%		KEGG_FRUCTOSE_AND_MANNOSE_METABOLISM	32	-0.150982	-1.01733	0.426877	0.568657	1	7939	tags=63%, list=47%, signal=119%		KEGG_ANTIGEN_PROCESSING_AND_PRESENTATION	67	0.176306	1.71249	0.0254902	0.0608861	0.879	6802	tags=58%, list=41%, signal=98%
KEGG_ONE_CARBON_POOL_BY_FOLATE	17	0.331578	1.68792	0.0268041	0.08255	0.896	6269	tags=71%, list=37%, signal=113%		KEGG_MAPK_SIGNALING_PATHWAY	239	-0.0903994	-1.6256	0.0245902	0.0950942	0.972	10554	tags=72%, list=63%, signal=192%		KEGG_ONE_CARBON_POOL_BY_FOLATE	17	0.356315	1.7535	0.0140281	0.052501	0.836	2902	tags=53%, list=17%, signal=64%		KEGG_REGULATION_OF_AUTOPHAGY	22	-0.17936	-1.01322	0.410569	0.566054	1	11457	tags=86%, list=68%, signal=273%		KEGG_TOLL_LIKE_RECEPTOR_SIGNALING_PATHWAY	90	0.15323	1.70192	0.0230769	0.0629096	0.893	11395	tags=83%, list=68%, signal=260%
KEGG_GLYCEROPHOSPHOLIPID_METABOLISM	68	-0.174134	-1.64981	0.0443975	0.0912067	0.95	10635	tags=81%, list=64%, signal=221%		KEGG_NITROGEN_METABOLISM	20	-0.295406	-1.59973	0.0337553	0.10003	0.982	3431	tags=50%, list=21%, signal=63%		KEGG_LEISHMANIA_INFECTION	66	0.179882	1.74757	0.0186722	0.0532902	0.843	804	tags=23%, list=5%, signal=24%		KEGG_TGF_BETA_SIGNALING_PATHWAY	83	-0.0929917	-0.996954	0.454545	0.583232	1	10954	tags=75%, list=65%, signal=215%		KEGG_NOD_LIKE_RECEPTOR_SIGNALING_PATHWAY	58	0.188353	1.69455	0.0348162	0.0639369	0.901	12728	tags=95%, list=76%, signal=395%
KEGG_SELENOAMINO_ACID_METABOLISM	23	0.284631	1.65187	0.0435685	0.093943	0.939	9795	tags=87%, list=59%, signal=209%		KEGG_PROPANOATE_METABOLISM	32	-0.238446	-1.61085	0.0555556	0.100103	0.977	8570	tags=75%, list=51%, signal=153%		KEGG_BIOSYNTHESIS_OF_UNSATURATED_FATTY_ACIDS	21	0.320926	1.73044	0.0215264	0.0565359	0.868	6589	tags=71%, list=39%, signal=118%		KEGG_REGULATION_OF_ACTIN_CYTOSKELETON	193	-0.0591685	-0.954001	0.514677	0.645738	1	11856	tags=77%, list=71%, signal=260%		KEGG_DRUG_METABOLISM_CYTOCHROME_P450	50	-0.212327	-1.7731	0.028169	0.0724278	0.779	6165	tags=58%, list=37%, signal=92%
KEGG_THYROID_CANCER	28	-0.254737	-1.61836	0.0364372	0.101548	0.967	1722	tags=36%, list=10%, signal=40%		KEGG_TASTE_TRANSDUCTION	43	0.220246	1.7056	0.0287908	0.100827	0.889	2939	tags=40%, list=18%, signal=48%		KEGG_CALCIUM_SIGNALING_PATHWAY	153	-0.122063	-1.77564	0.0263158	0.059686	0.778	8806	tags=65%, list=53%, signal=135%		KEGG_GLYCOSAMINOGLYCAN_BIOSYNTHESIS_CHONDROITIN_SULFATE	22	-0.163472	-0.935015	0.534791	0.668784	1	4876	tags=45%, list=29%, signal=64%		KEGG_COLORECTAL_CANCER	62	0.176435	1.6369	0.0404624	0.0835896	0.957	5965	tags=53%, list=36%, signal=82%
KEGG_PHOSPHATIDYLINOSITOL_SIGNALING_SYSTEM	72	-0.163106	-1.62191	0.0291829	0.101986	0.965	11927	tags=88%, list=71%, signal=303%		KEGG_PROTEASOME	43	0.217444	1.68929	0.0229167	0.100852	0.908	12716	tags=98%, list=76%, signal=406%		KEGG_ANTIGEN_PROCESSING_AND_PRESENTATION	67	0.176757	1.71155	0.0322581	0.0615041	0.89	3797	tags=40%, list=23%, signal=52%		KEGG_GALACTOSE_METABOLISM	22	-0.160491	-0.910553	0.571429	0.70138	1	7208	tags=59%, list=43%, signal=104%		KEGG_RENAL_CELL_CARCINOMA	70	0.161736	1.60406	0.0477137	0.0944719	0.982	4237	tags=41%, list=25%, signal=55%
KEGG_PENTOSE_PHOSPHATE_PATHWAY	25	-0.267204	-1.57892	0.0523139	0.120442	0.984	9594	tags=84%, list=57%, signal=197%		KEGG_CHRONIC_MYELOID_LEUKEMIA	71	-0.163693	-1.60511	0.0364372	0.101288	0.979	10709	tags=80%, list=64%, signal=222%		KEGG_HEMATOPOIETIC_CELL_LINEAGE	79	0.162268	1.69822	0.0252918	0.064803	0.905	3016	tags=34%, list=18%, signal=41%		KEGG_ETHER_LIPID_METABOLISM	26	-0.141914	-0.865664	0.638996	0.771563	1	7285	tags=58%, list=44%, signal=102%		KEGG_LYSINE_DEGRADATION	44	0.204159	1.59898	0.0458015	0.0948721	0.984	6861	tags=61%, list=41%, signal=104%
KEGG_GLYCOLYSIS_GLUCONEOGENESIS	55	-0.183643	-1.56877	0.0666667	0.123592	0.991	8805	tags=71%, list=53%, signal=149%		KEGG_ADIPOCYTOKINE_SIGNALING_PATHWAY	61	-0.173354	-1.60067	0.0400844	0.101459	0.982	10554	tags=80%, list=63%, signal=217%		KEGG_GALACTOSE_METABOLISM	22	0.302544	1.67432	0.04	0.071675	0.934	4071	tags=55%, list=24%, signal=72%		KEGG_NOTCH_SIGNALING_PATHWAY	46	-0.10881	-0.860939	0.619632	0.767917	1	12738	tags=87%, list=76%, signal=363%		KEGG_GALACTOSE_METABOLISM	22	0.291677	1.60504	0.0332031	0.0960206	0.982	8817	tags=82%, list=53%, signal=173%
KEGG_PROXIMAL_TUBULE_BICARBONATE_RECLAMATION	22	-0.268653	-1.52148	0.0681363	0.146784	0.998	3118	tags=45%, list=19%, signal=56%		KEGG_ARACHIDONIC_ACID_METABOLISM	43	-0.207571	-1.58474	0.045082	0.103191	0.986	3931	tags=44%, list=23%, signal=58%		KEGG_TOLL_LIKE_RECEPTOR_SIGNALING_PATHWAY	90	0.14697	1.64817	0.0337302	0.0808221	0.95	8152	tags=63%, list=49%, signal=123%		KEGG_LINOLEIC_ACID_METABOLISM	21	-0.154367	-0.858012	0.623274	0.762037	1	10172	tags=76%, list=61%, signal=194%		KEGG_ASTHMA	23	-0.292454	-1.66523	0.0272374	0.110132	0.931	6028	tags=65%, list=36%, signal=102%
KEGG_FC_EPSILON_RI_SIGNALING_PATHWAY	69	-0.15668	-1.52353	0.0671937	0.148444	0.998	11215	tags=83%, list=67%, signal=249%		KEGG_VEGF_SIGNALING_PATHWAY	68	-0.163995	-1.58602	0.0479846	0.104294	0.986	6620	tags=56%, list=40%, signal=92%		KEGG_SNARE_INTERACTIONS_IN_VESICULAR_TRANSPORT	38	0.225331	1.62895	0.0404858	0.087301	0.963	12532	tags=97%, list=75%, signal=387%		KEGG_DRUG_METABOLISM_CYTOCHROME_P450	50	-0.103155	-0.8478	0.645098	0.769138	1	3970	tags=34%, list=24%, signal=44%		KEGG_ARACHIDONIC_ACID_METABOLISM	43	-0.216008	-1.67244	0.0331263	0.114081	0.926	5347	tags=53%, list=32%, signal=78%
KEGG_PROGESTERONE_MEDIATED_OOCYTE_MATURATION	82	-0.144495	-1.50928	0.0684105	0.152793	0.998	4738	tags=43%, list=28%, signal=59%		KEGG_PEROXISOME	75	-0.154687	-1.57136	0.0574257	0.106086	0.991	11482	tags=84%, list=69%, signal=266%		KEGG_COLORECTAL_CANCER	62	0.177446	1.61769	0.0242915	0.0903987	0.97	6488	tags=56%, list=39%, signal=92%		KEGG_FC_EPSILON_RI_SIGNALING_PATHWAY	69	-0.0867487	-0.844573	0.627572	0.763641	1	12138	tags=81%, list=73%, signal=294%		KEGG_SNARE_INTERACTIONS_IN_VESICULAR_TRANSPORT	38	0.213272	1.554	0.0613861	0.114873	0.992	9210	tags=76%, list=55%, signal=169%
KEGG_CELL_CYCLE	124	-0.112433	-1.4704	0.0745968	0.175899	1	7581	tags=56%, list=45%, signal=102%		KEGG_APOPTOSIS	84	-0.145685	-1.57287	0.0537428	0.106886	0.99	10924	tags=80%, list=65%, signal=229%		KEGG_METABOLISM_OF_XENOBIOTICS_BY_CYTOCHROME_P450	48	-0.202681	-1.66589	0.0327553	0.096306	0.923	4638	tags=48%, list=28%, signal=66%		KEGG_TRYPTOPHAN_METABOLISM	37	-0.116369	-0.836801	0.679012	0.765708	1	2581	tags=27%, list=15%, signal=32%		KEGG_TGF_BETA_SIGNALING_PATHWAY	83	-0.152587	-1.6327	0.0289575	0.12076	0.95	9155	tags=70%, list=55%, signal=154%
KEGG_HOMOLOGOUS_RECOMBINATION	28	-0.223751	-1.45853	0.102669	0.181434	1	10010	tags=82%, list=60%, signal=204%		KEGG_INOSITOL_PHOSPHATE_METABOLISM	52	-0.182902	-1.56459	0.0537849	0.10809	0.991	6283	tags=56%, list=38%, signal=89%		KEGG_ADHERENS_JUNCTION	73	0.155354	1.56864	0.0665281	0.109892	0.991	6810	tags=56%, list=41%, signal=94%		KEGG_ACUTE_MYELOID_LEUKEMIA	57	-0.0924411	-0.833556	0.672655	0.761061	1	3157	tags=28%, list=19%, signal=34%		KEGG_HYPERTROPHIC_CARDIOMYOPATHY_HCM	74	-0.155351	-1.57171	0.0557769	0.15124	0.984	7816	tags=62%, list=47%, signal=116%
KEGG_DRUG_METABOLISM_CYTOCHROME_P450	50	-0.176045	-1.44298	0.0929752	0.189533	1	8444	tags=68%, list=50%, signal=137%		KEGG_GLYOXYLATE_AND_DICARBOXYLATE_METABOLISM	15	0.35448	1.65559	0.026	0.111901	0.945	9692	tags=93%, list=58%, signal=222%		KEGG_PROSTATE_CANCER	86	0.146148	1.56874	0.0709939	0.1117	0.991	13134	tags=93%, list=78%, signal=430%		KEGG_FC_GAMMA_R_MEDIATED_PHAGOCYTOSIS	92	-0.0724507	-0.813998	0.702041	0.781519	1	9528	tags=64%, list=57%, signal=148%		KEGG_PYRUVATE_METABOLISM	40	0.196502	1.46654	0.0960784	0.16644	1	1739	tags=30%, list=10%, signal=33%
KEGG_NUCLEOTIDE_EXCISION_REPAIR	44	0.185756	1.48669	0.0925926	0.195094	0.997	13254	tags=98%, list=79%, signal=468%		KEGG_GNRH_SIGNALING_PATHWAY	87	-0.140063	-1.51562	0.0559006	0.130131	0.995	10173	tags=75%, list=61%, signal=190%		KEGG_RENAL_CELL_CARCINOMA	70	0.158519	1.55294	0.0524272	0.116544	0.993	2617	tags=31%, list=16%, signal=37%		KEGG_NON_SMALL_CELL_LUNG_CANCER	53	-0.093678	-0.801974	0.704062	0.789777	1	2859	tags=26%, list=17%, signal=32%		KEGG_REGULATION_OF_ACTIN_CYTOSKELETON	193	0.0891841	1.44684	0.0642722	0.168794	1	8756	tags=61%, list=52%, signal=127%
KEGG_B_CELL_RECEPTOR_SIGNALING_PATHWAY	74	-0.13829	-1.41669	0.112903	0.200679	1	4934	tags=43%, list=29%, signal=61%		KEGG_GLIOMA	61	-0.164355	-1.51003	0.0607843	0.131468	0.995	6863	tags=57%, list=41%, signal=97%		KEGG_RNA_POLYMERASE	28	0.243587	1.5402	0.0540541	0.12159	0.995	6688	tags=64%, list=40%, signal=107%		KEGG_STEROID_HORMONE_BIOSYNTHESIS	35	-0.112199	-0.789108	0.741735	0.798929	1	14385	tags=97%, list=86%, signal=690%		KEGG_PROPANOATE_METABOLISM	32	0.216355	1.45737	0.0698603	0.170088	1	7368	tags=66%, list=44%, signal=117%
KEGG_JAK_STAT_SIGNALING_PATHWAY	123	-0.110884	-1.42256	0.0972222	0.202435	1	4690	tags=39%, list=28%, signal=54%		KEGG_ACUTE_MYELOID_LEUKEMIA	57	-0.16951	-1.51579	0.0680934	0.132191	0.995	6863	tags=58%, list=41%, signal=98%		KEGG_STARCH_AND_SUCROSE_METABOLISM	34	0.222281	1.53064	0.0755814	0.123132	0.997	3670	tags=44%, list=22%, signal=56%		KEGG_MELANOMA	61	-0.0841291	-0.778052	0.755682	0.805838	1	3811	tags=31%, list=23%, signal=40%		KEGG_STEROID_BIOSYNTHESIS	16	0.286782	1.44826	0.0888889	0.170724	1	6710	tags=69%, list=40%, signal=115%
KEGG_T_CELL_RECEPTOR_SIGNALING_PATHWAY	103	-0.118015	-1.41842	0.103448	0.20279	1	9737	tags=70%, list=58%, signal=166%		KEGG_TGF_BETA_SIGNALING_PATHWAY	83	-0.143066	-1.51718	0.0718563	0.133573	0.995	8507	tags=65%, list=51%, signal=132%		KEGG_CYTOSOLIC_DNA_SENSING_PATHWAY	42	0.198089	1.53324	0.0615079	0.123698	0.997	6654	tags=60%, list=40%, signal=99%		KEGG_SMALL_CELL_LUNG_CANCER	83	-0.0715925	-0.770002	0.783613	0.807544	1	11512	tags=76%, list=69%, signal=242%		KEGG_P53_SIGNALING_PATHWAY	66	0.147467	1.44857	0.0836653	0.173487	1	5148	tags=45%, list=31%, signal=65%
KEGG_PYRUVATE_METABOLISM	40	0.194813	1.46152	0.0829959	0.20936	1	4696	tags=48%, list=28%, signal=66%		KEGG_SNARE_INTERACTIONS_IN_VESICULAR_TRANSPORT	38	-0.199747	-1.46507	0.0680412	0.153427	0.998	8557	tags=71%, list=51%, signal=145%		KEGG_TIGHT_JUNCTION	120	-0.124214	-1.59607	0.057732	0.12436	0.971	2400	tags=27%, list=14%, signal=31%		KEGG_PROSTATE_CANCER	86	-0.0673455	-0.741627	0.788066	0.835799	1	3161	tags=26%, list=19%, signal=31%		KEGG_CHEMOKINE_SIGNALING_PATHWAY	169	0.0935448	1.42362	0.108949	0.180536	1	11026	tags=75%, list=66%, signal=218%
KEGG_TRYPTOPHAN_METABOLISM	37	-0.193456	-1.40157	0.105263	0.209686	1	4460	tags=46%, list=27%, signal=63%		KEGG_NICOTINATE_AND_NICOTINAMIDE_METABOLISM	23	-0.255357	-1.46541	0.0892116	0.155426	0.998	6648	tags=65%, list=40%, signal=108%		KEGG_ENDOCYTOSIS	178	0.0997332	1.52098	0.0662879	0.126626	0.998	8314	tags=60%, list=50%, signal=117%		KEGG_METABOLISM_OF_XENOBIOTICS_BY_CYTOCHROME_P450	48	-0.0764421	-0.64192	0.915686	0.943145	1	4304	tags=33%, list=26%, signal=45%		KEGG_GLYOXYLATE_AND_DICARBOXYLATE_METABOLISM	15	0.305967	1.42573	0.0838095	0.181965	1	7156	tags=73%, list=43%, signal=128%
KEGG_STEROID_BIOSYNTHESIS	16	0.293301	1.43385	0.111562	0.215333	1	8693	tags=81%, list=52%, signal=169%		KEGG_NON_SMALL_CELL_LUNG_CANCER	53	-0.166759	-1.43224	0.0848126	0.173917	0.998	11113	tags=83%, list=66%, signal=246%		KEGG_PROXIMAL_TUBULE_BICARBONATE_RECLAMATION	22	0.267098	1.51069	0.0657084	0.130372	0.998	3142	tags=45%, list=19%, signal=56%		KEGG_MTOR_SIGNALING_PATHWAY	50	-0.0724296	-0.609698	0.930902	0.959275	1	14859	tags=96%, list=89%, signal=853%		KEGG_AXON_GUIDANCE	124	-0.117168	-1.50272	0.0801603	0.187248	0.997	8987	tags=65%, list=54%, signal=140%
KEGG_CYSTEINE_AND_METHIONINE_METABOLISM	32	0.212524	1.43498	0.0951456	0.223825	1	11093	tags=88%, list=66%, signal=259%		KEGG_TYROSINE_METABOLISM	38	0.208229	1.51237	0.0802348	0.206071	0.995	4890	tags=50%, list=29%, signal=70%		KEGG_CARDIAC_MUSCLE_CONTRACTION	63	0.162867	1.50539	0.0524017	0.131502	0.998	6050	tags=52%, list=36%, signal=82%		KEGG_PHENYLALANINE_METABOLISM	17	-0.0962836	-0.477723	0.987928	1	1	6267	tags=47%, list=37%, signal=75%		KEGG_STEROID_HORMONE_BIOSYNTHESIS	35	-0.217918	-1.50642	0.0668058	0.193393	0.997	8794	tags=74%, list=53%, signal=156%
KEGG_ANTIGEN_PROCESSING_AND_PRESENTATION	67	-0.143026	-1.36708	0.103239	0.237793	1	5860	tags=49%, list=35%, signal=75%		KEGG_ALDOSTERONE_REGULATED_SODIUM_REABSORPTION	38	-0.183372	-1.36678	0.10775	0.224116	1	8390	tags=68%, list=50%, signal=137%		KEGG_N_GLYCAN_BIOSYNTHESIS	46	-0.192784	-1.56797	0.045082	0.132976	0.984	10245	tags=80%, list=61%, signal=207%		KEGG_ADHERENS_JUNCTION	73	-0.0462077	-0.468397	0.991984	0.995213	1	15050	tags=95%, list=90%, signal=934%		KEGG_SELENOAMINO_ACID_METABOLISM	23	0.242235	1.38213	0.107071	0.211648	1	5410	tags=57%, list=32%, signal=83%
KEGG_PROSTATE_CANCER	86	-0.124	-1.34878	0.141414	0.247514	1	6499	tags=51%, list=39%, signal=83%		KEGG_MTOR_SIGNALING_PATHWAY	50	-0.160278	-1.35609	0.129167	0.230981	1	12389	tags=90%, list=74%, signal=345%		KEGG_BUTANOATE_METABOLISM	31	0.221726	1.48704	0.0748988	0.138282	0.999	4933	tags=52%, list=29%, signal=73%		KEGG_OXIDATIVE_PHOSPHORYLATION	120	0.43552	5.49825	0	0	0	4896	tags=73%, list=29%, signal=102%		KEGG_N_GLYCAN_BIOSYNTHESIS	46	0.17043	1.362	0.116	0.227026	1	6614	tags=57%, list=40%, signal=93%
KEGG_MISMATCH_REPAIR	23	-0.230066	-1.35251	0.14	0.248299	1	8526	tags=74%, list=51%, signal=150%		KEGG_GLYCINE_SERINE_AND_THREONINE_METABOLISM	28	0.225854	1.4596	0.0828516	0.244991	0.997	3398	tags=43%, list=20%, signal=54%		KEGG_LYSINE_DEGRADATION	44	0.192221	1.48736	0.0791506	0.140201	0.999	12005	tags=91%, list=72%, signal=321%		KEGG_PARKINSONS_DISEASE	118	0.418208	5.31304	0	0	0	4112	tags=66%, list=25%, signal=87%		KEGG_ADIPOCYTOKINE_SIGNALING_PATHWAY	61	0.1444	1.34865	0.131524	0.236046	1	9663	tags=72%, list=58%, signal=170%
KEGG_METABOLISM_OF_XENOBIOTICS_BY_CYTOCHROME_P450	48	-0.162652	-1.3337	0.114894	0.258559	1	8444	tags=67%, list=50%, signal=134%		KEGG_PANTOTHENATE_AND_COA_BIOSYNTHESIS	16	-0.275419	-1.32699	0.163743	0.254953	1	4810	tags=56%, list=29%, signal=79%		KEGG_PPAR_SIGNALING_PATHWAY	56	0.165673	1.44776	0.0952381	0.161014	0.999	2615	tags=32%, list=16%, signal=38%		KEGG_HUNTINGTONS_DISEASE	168	0.345275	5.14902	0	0	0	6432	tags=73%, list=38%, signal=117%		KEGG_ACUTE_MYELOID_LEUKEMIA	57	0.151136	1.32929	0.162476	0.243991	1	9810	tags=74%, list=59%, signal=177%
KEGG_GNRH_SIGNALING_PATHWAY	87	-0.118915	-1.30998	0.153558	0.278911	1	6293	tags=49%, list=38%, signal=79%		KEGG_VASCULAR_SMOOTH_MUSCLE_CONTRACTION	99	-0.111332	-1.31518	0.169014	0.263027	1	8968	tags=65%, list=54%, signal=138%		KEGG_SMALL_CELL_LUNG_CANCER	83	0.136812	1.44449	0.0882353	0.161117	0.999	12037	tags=86%, list=72%, signal=303%		KEGG_ALZHEIMERS_DISEASE	153	0.332547	4.76511	0	0	0	4876	tags=62%, list=29%, signal=87%		KEGG_PROTEIN_EXPORT	23	0.22755	1.33652	0.130261	0.244058	1	10749	tags=87%, list=64%, signal=243%
KEGG_MELANOGENESIS	90	-0.114931	-1.29227	0.156673	0.294774	1	5898	tags=47%, list=35%, signal=72%		KEGG_LONG_TERM_POTENTIATION	65	-0.141077	-1.30617	0.15493	0.264547	1	10008	tags=74%, list=60%, signal=183%		KEGG_CYSTEINE_AND_METHIONINE_METABOLISM	32	0.212284	1.43296	0.0764331	0.164453	0.999	6390	tags=59%, list=38%, signal=96%		KEGG_SPLICEOSOME	126	0.355544	4.71534	0	0	0	6579	tags=75%, list=39%, signal=122%		KEGG_RIG_I_LIKE_RECEPTOR_SIGNALING_PATHWAY	56	0.15048	1.32201	0.161479	0.244139	1	7949	tags=63%, list=47%, signal=119%
KEGG_PROPANOATE_METABOLISM	32	0.20085	1.33413	0.147117	0.312546	1	13380	tags=100%, list=80%, signal=498%		KEGG_REGULATION_OF_AUTOPHAGY	22	-0.231515	-1.30889	0.153226	0.265719	1	11346	tags=91%, list=68%, signal=282%		KEGG_VIBRIO_CHOLERAE_INFECTION	53	0.168888	1.43482	0.0910891	0.165485	0.999	4760	tags=45%, list=28%, signal=63%		KEGG_RIBOSOME	85	0.431275	4.65494	0	0	0	7388	tags=87%, list=44%, signal=155%		KEGG_ENDOMETRIAL_CANCER	52	0.151642	1.33213	0.128459	0.244418	1	10021	tags=75%, list=60%, signal=186%
KEGG_LYSINE_DEGRADATION	44	0.162691	1.27871	0.166667	0.334452	1	13639	tags=98%, list=81%, signal=527%		KEGG_PATHOGENIC_ESCHERICHIA_COLI_INFECTION	54	-0.149871	-1.29297	0.169072	0.27448	1	5249	tags=46%, list=31%, signal=67%		KEGG_PYRUVATE_METABOLISM	40	0.192262	1.41882	0.108949	0.173005	0.999	3065	tags=38%, list=18%, signal=46%		KEGG_PROTEASOME	43	0.571614	4.40952	0	0	0	5247	tags=88%, list=31%, signal=128%		KEGG_INOSITOL_PHOSPHATE_METABOLISM	52	0.155672	1.32406	0.157676	0.245437	1	11563	tags=85%, list=69%, signal=273%
KEGG_GLYCOSAMINOGLYCAN_BIOSYNTHESIS_CHONDROITIN_SULFATE	22	0.234594	1.30236	0.155689	0.34062	1	4446	tags=50%, list=27%, signal=68%		KEGG_GLUTATHIONE_METABOLISM	41	-0.166533	-1.28465	0.2	0.279363	1	8242	tags=66%, list=49%, signal=129%		KEGG_GLYCEROPHOSPHOLIPID_METABOLISM	68	0.148012	1.41512	0.126214	0.173499	0.999	8115	tags=63%, list=48%, signal=122%		KEGG_CELL_CYCLE	124	0.26535	3.43787	0	0	0	8143	tags=75%, list=49%, signal=145%		KEGG_ABC_TRANSPORTERS	40	-0.178354	-1.31026	0.153846	0.276013	1	8320	tags=68%, list=50%, signal=134%
KEGG_PANCREATIC_CANCER	70	-0.12636	-1.24692	0.22093	0.344555	1	6024	tags=49%, list=36%, signal=76%		KEGG_HISTIDINE_METABOLISM	27	-0.204359	-1.28052	0.17551	0.280165	1	6504	tags=59%, list=39%, signal=97%		KEGG_PATHWAYS_IN_CANCER	306	0.0698746	1.38172	0.0996094	0.193977	1	3117	tags=25%, list=19%, signal=31%		KEGG_RNA_DEGRADATION	53	0.401415	3.39282	0	0	0	7512	tags=85%, list=45%, signal=154%		KEGG_MAPK_SIGNALING_PATHWAY	239	-0.0772835	-1.38205	0.114851	0.282393	1	12521	tags=82%, list=75%, signal=323%
KEGG_VALINE_LEUCINE_AND_ISOLEUCINE_DEGRADATION	44	0.164156	1.27872	0.181818	0.346396	1	6768	tags=57%, list=40%, signal=95%		KEGG_PROXIMAL_TUBULE_BICARBONATE_RECLAMATION	22	-0.228953	-1.26711	0.172211	0.291378	1	5303	tags=55%, list=32%, signal=80%		KEGG_GAP_JUNCTION	85	0.126353	1.3819	0.10142	0.196289	1	11087	tags=79%, list=66%, signal=232%		KEGG_UBIQUITIN_MEDIATED_PROTEOLYSIS	131	0.251249	3.28422	0	0	0	6814	tags=66%, list=41%, signal=110%		KEGG_WNT_SIGNALING_PATHWAY	139	-0.0947389	-1.3115	0.156522	0.284198	1	6014	tags=45%, list=36%, signal=70%
KEGG_GLYCOSPHINGOLIPID_BIOSYNTHESIS_GANGLIO_SERIES	15	0.272867	1.25929	0.177686	0.346892	1	5478	tags=60%, list=33%, signal=89%		KEGG_AMINOACYL_TRNA_BIOSYNTHESIS	22	0.238738	1.37519	0.125	0.32945	1	11984	tags=95%, list=72%, signal=336%		KEGG_LONG_TERM_POTENTIATION	65	0.146937	1.361	0.131635	0.200612	1	2184	tags=28%, list=13%, signal=32%		KEGG_CITRATE_CYCLE_TCA_CYCLE	30	0.457788	2.912	0	0	0	5740	tags=80%, list=34%, signal=122%		KEGG_NOTCH_SIGNALING_PATHWAY	46	-0.166801	-1.34762	0.147844	0.285786	1	9951	tags=76%, list=59%, signal=187%
KEGG_REGULATION_OF_AUTOPHAGY	22	0.232984	1.28676	0.177165	0.348277	1	9798	tags=82%, list=59%, signal=197%		KEGG_STARCH_AND_SUCROSE_METABOLISM	34	-0.180102	-1.22437	0.202312	0.332493	1	3392	tags=38%, list=20%, signal=48%		KEGG_SELENOAMINO_ACID_METABOLISM	23	0.236707	1.36477	0.129845	0.202265	1	8413	tags=74%, list=50%, signal=148%		KEGG_OOCYTE_MEIOSIS	104	0.240995	2.85059	0	0	0	8060	tags=72%, list=48%, signal=138%		KEGG_METABOLISM_OF_XENOBIOTICS_BY_CYTOCHROME_P450	48	-0.170741	-1.36865	0.140594	0.286249	1	9355	tags=73%, list=56%, signal=165%
KEGG_BLADDER_CANCER	42	-0.167848	-1.23422	0.206122	0.355071	1	4770	tags=45%, list=29%, signal=63%		KEGG_VIBRIO_CHOLERAE_INFECTION	53	-0.143452	-1.22491	0.209346	0.336168	1	7081	tags=57%, list=42%, signal=98%		KEGG_PRION_DISEASES	33	0.199525	1.36812	0.120833	0.202287	1	2245	tags=33%, list=13%, signal=38%		KEGG_DNA_REPLICATION	36	0.408556	2.84579	0	0	0	6193	tags=78%, list=37%, signal=123%		KEGG_CYSTEINE_AND_METHIONINE_METABOLISM	32	0.191092	1.27395	0.162698	0.289025	1	8313	tags=69%, list=50%, signal=136%
KEGG_NATURAL_KILLER_CELL_MEDIATED_CYTOTOXICITY	114	-0.100706	-1.22753	0.191083	0.358293	1	5227	tags=41%, list=31%, signal=60%		KEGG_AMINO_SUGAR_AND_NUCLEOTIDE_SUGAR_METABOLISM	41	-0.161534	-1.20176	0.228745	0.355231	1	13632	tags=98%, list=81%, signal=525%		KEGG_THYROID_CANCER	28	0.218698	1.36122	0.112903	0.203042	1	13081	tags=100%, list=78%, signal=457%		KEGG_PYRIMIDINE_METABOLISM	96	0.24351	2.7184	0	0.000155747	0.002	9022	tags=78%, list=54%, signal=169%		KEGG_GNRH_SIGNALING_PATHWAY	87	-0.117449	-1.32439	0.136268	0.290517	1	4009	tags=36%, list=24%, signal=47%
KEGG_PRION_DISEASES	33	-0.178331	-1.21871	0.231092	0.365285	1	2601	tags=33%, list=16%, signal=39%		KEGG_MELANOMA	61	-0.130089	-1.19653	0.246602	0.356862	1	10178	tags=74%, list=61%, signal=188%		KEGG_PROTEIN_EXPORT	23	-0.25081	-1.4517	0.0816327	0.209252	1	6724	tags=65%, list=40%, signal=109%		KEGG_BASE_EXCISION_REPAIR	33	0.362009	2.50862	0.00196464	0.000623224	0.009	6124	tags=73%, list=37%, signal=114%		KEGG_VASCULAR_SMOOTH_MUSCLE_CONTRACTION	99	-0.114154	-1.33293	0.119192	0.291132	1	8752	tags=64%, list=52%, signal=133%
KEGG_OOCYTE_MEIOSIS	104	-0.1015	-1.20855	0.22288	0.373148	1	10543	tags=73%, list=63%, signal=196%		KEGG_GALACTOSE_METABOLISM	22	-0.20476	-1.17704	0.247967	0.372826	1	9511	tags=77%, list=57%, signal=179%		KEGG_GLIOMA	61	0.142093	1.33839	0.138672	0.217151	1	11622	tags=84%, list=69%, signal=273%		KEGG_RNA_POLYMERASE	28	0.388744	2.47115	0	0.000967307	0.015	7849	tags=86%, list=47%, signal=161%		KEGG_RETINOL_METABOLISM	39	-0.182179	-1.35315	0.117526	0.291506	1	9833	tags=77%, list=59%, signal=186%
KEGG_ERBB_SIGNALING_PATHWAY	84	0.113866	1.23099	0.215264	0.374894	1	9061	tags=65%, list=54%, signal=142%		KEGG_DRUG_METABOLISM_CYTOCHROME_P450	50	0.155047	1.32877	0.132924	0.373904	1	4441	tags=42%, list=27%, signal=57%		KEGG_NON_SMALL_CELL_LUNG_CANCER	53	0.155057	1.32819	0.149068	0.218282	1	11622	tags=85%, list=69%, signal=277%		KEGG_NUCLEOTIDE_EXCISION_REPAIR	44	0.308406	2.38975	0	0.0023186	0.037	10446	tags=93%, list=62%, signal=247%		KEGG_TIGHT_JUNCTION	120	-0.102435	-1.3137	0.15098	0.291654	1	4296	tags=36%, list=26%, signal=48%
KEGG_TYPE_II_DIABETES_MELLITUS	42	-0.15425	-1.19715	0.236742	0.382286	1	4997	tags=45%, list=30%, signal=64%		KEGG_MELANOGENESIS	90	-0.1072	-1.17121	0.25	0.375478	1	13093	tags=89%, list=78%, signal=406%		KEGG_PROPANOATE_METABOLISM	32	0.195342	1.32937	0.147844	0.219746	1	7719	tags=66%, list=46%, signal=122%		KEGG_PEROXISOME	75	0.202902	2.13261	0.00610998	0.0104674	0.165	3536	tags=41%, list=21%, signal=52%		KEGG_JAK_STAT_SIGNALING_PATHWAY	123	-0.10211	-1.28601	0.180198	0.292671	1	13680	tags=92%, list=82%, signal=499%
KEGG_CARDIAC_MUSCLE_CONTRACTION	63	-0.128753	-1.19279	0.244094	0.382615	1	14059	tags=97%, list=84%, signal=603%		KEGG_ALZHEIMERS_DISEASE	153	0.0889528	1.28725	0.162272	0.375498	1	9900	tags=68%, list=59%, signal=165%		KEGG_ACUTE_MYELOID_LEUKEMIA	57	0.148663	1.33062	0.13189	0.221363	1	13081	tags=93%, list=78%, signal=424%		KEGG_LYSOSOME	119	0.160161	2.04254	0.00618557	0.0185937	0.28	10417	tags=78%, list=62%, signal=206%		KEGG_TYROSINE_METABOLISM	38	-0.186325	-1.38344	0.103718	0.294176	1	6579	tags=58%, list=39%, signal=95%
KEGG_ARACHIDONIC_ACID_METABOLISM	43	-0.152442	-1.18457	0.253465	0.388272	1	2516	tags=30%, list=15%, signal=35%		KEGG_PORPHYRIN_AND_CHLOROPHYLL_METABOLISM	28	-0.186771	-1.17822	0.235644	0.376037	1	8237	tags=68%, list=49%, signal=133%		KEGG_INOSITOL_PHOSPHATE_METABOLISM	52	0.155778	1.32102	0.146474	0.222173	1	9952	tags=75%, list=59%, signal=184%		KEGG_MISMATCH_REPAIR	23	0.32748	1.91265	0.00203252	0.0362707	0.497	2530	tags=48%, list=15%, signal=56%		KEGG_HEMATOPOIETIC_CELL_LINEAGE	79	-0.123653	-1.27278	0.175403	0.298193	1	5356	tags=44%, list=32%, signal=65%
KEGG_SNARE_INTERACTIONS_IN_VESICULAR_TRANSPORT	38	-0.162761	-1.17992	0.256262	0.388954	1	9615	tags=74%, list=57%, signal=173%		KEGG_PYRIMIDINE_METABOLISM	96	0.11266	1.31129	0.156942	0.379027	1	13640	tags=93%, list=82%, signal=498%		KEGG_GRAFT_VERSUS_HOST_DISEASE	35	0.183679	1.29289	0.160825	0.242313	1	9842	tags=77%, list=59%, signal=187%		KEGG_GLYCOSYLPHOSPHATIDYLINOSITOL_GPI_ANCHOR_BIOSYNTHESIS	25	0.302471	1.86185	0.00943396	0.0464454	0.6	4986	tags=60%, list=30%, signal=85%		KEGG_GLIOMA	61	0.135821	1.25687	0.177291	0.303685	1	5965	tags=49%, list=36%, signal=76%
KEGG_LINOLEIC_ACID_METABOLISM	21	0.218982	1.17951	0.25462	0.411178	1	8293	tags=71%, list=50%, signal=141%		KEGG_METABOLISM_OF_XENOBIOTICS_BY_CYTOCHROME_P450	48	0.15608	1.29822	0.159923	0.379053	1	1927	tags=27%, list=12%, signal=31%		KEGG_FATTY_ACID_METABOLISM	39	0.175341	1.29378	0.156126	0.244452	1	2650	tags=33%, list=16%, signal=40%		KEGG_PATHOGENIC_ESCHERICHIA_COLI_INFECTION	54	0.212862	1.85809	0.0151803	0.0449501	0.605	9155	tags=76%, list=55%, signal=167%		KEGG_GLYCOSAMINOGLYCAN_BIOSYNTHESIS_CHONDROITIN_SULFATE	22	-0.218924	-1.23432	0.20404	0.33345	1	10035	tags=82%, list=60%, signal=204%
KEGG_TASTE_TRANSDUCTION	43	0.150899	1.18633	0.238901	0.413111	1	12270	tags=88%, list=73%, signal=330%		KEGG_SPHINGOLIPID_METABOLISM	36	-0.158563	-1.14412	0.276859	0.397509	1	5721	tags=50%, list=34%, signal=76%		KEGG_FC_EPSILON_RI_SIGNALING_PATHWAY	69	0.131798	1.2789	0.17551	0.25066	1	8232	tags=62%, list=49%, signal=122%		KEGG_AMINOACYL_TRNA_BIOSYNTHESIS	22	0.334559	1.85123	0.01417	0.0442312	0.615	8861	tags=86%, list=53%, signal=183%		KEGG_NITROGEN_METABOLISM	20	-0.228799	-1.21151	0.242363	0.35071	1	10402	tags=85%, list=62%, signal=224%
KEGG_MTOR_SIGNALING_PATHWAY	50	0.142841	1.18741	0.255061	0.424661	1	6653	tags=54%, list=40%, signal=89%		KEGG_GAP_JUNCTION	85	-0.104883	-1.14642	0.286538	0.39903	1	4949	tags=40%, list=30%, signal=57%		KEGG_ENDOMETRIAL_CANCER	52	0.152136	1.28	0.183468	0.252162	1	11622	tags=85%, list=69%, signal=276%		KEGG_N_GLYCAN_BIOSYNTHESIS	46	0.221994	1.82181	0.0164271	0.050812	0.682	8664	tags=74%, list=52%, signal=153%		KEGG_SYSTEMIC_LUPUS_ERYTHEMATOSUS	52	0.143878	1.21293	0.23913	0.352045	1	5001	tags=44%, list=30%, signal=63%
KEGG_HEDGEHOG_SIGNALING_PATHWAY	49	0.138864	1.14895	0.272727	0.4291	1	5879	tags=49%, list=35%, signal=75%		KEGG_VALINE_LEUCINE_AND_ISOLEUCINE_DEGRADATION	44	-0.145611	-1.14678	0.280738	0.403244	1	12785	tags=91%, list=76%, signal=384%		KEGG_ASTHMA	23	0.221679	1.25364	0.193483	0.272023	1	660	tags=26%, list=4%, signal=27%		KEGG_VALINE_LEUCINE_AND_ISOLEUCINE_DEGRADATION	44	0.227028	1.78612	0.020202	0.0590722	0.749	7240	tags=66%, list=43%, signal=116%		KEGG_LONG_TERM_POTENTIATION	65	0.127022	1.20045	0.239437	0.357642	1	2516	tags=28%, list=15%, signal=32%
KEGG_PEROXISOME	75	0.114293	1.15072	0.275	0.438939	1	12153	tags=84%, list=73%, signal=305%		KEGG_UBIQUITIN_MEDIATED_PROTEOLYSIS	131	-0.0831208	-1.12485	0.309434	0.413863	1	14718	tags=96%, list=88%, signal=791%		KEGG_MTOR_SIGNALING_PATHWAY	50	0.148874	1.24986	0.203522	0.272413	1	12912	tags=92%, list=77%, signal=401%		KEGG_PURINE_METABOLISM	151	0.1208	1.73086	0.031746	0.0770083	0.85	11074	tags=78%, list=66%, signal=229%		KEGG_AMYOTROPHIC_LATERAL_SCLEROSIS_ALS	49	0.144623	1.20284	0.228745	0.359493	1	6466	tags=53%, list=39%, signal=86%
KEGG_EPITHELIAL_CELL_SIGNALING_IN_HELICOBACTER_PYLORI_INFECTION	66	-0.116509	-1.13737	0.273921	0.443402	1	10484	tags=74%, list=63%, signal=198%		KEGG_LONG_TERM_DEPRESSION	61	-0.12359	-1.1269	0.290389	0.415819	1	10012	tags=72%, list=60%, signal=179%		KEGG_BETA_ALANINE_METABOLISM	21	0.226403	1.23688	0.194444	0.283111	1	7372	tags=67%, list=44%, signal=119%		KEGG_PROTEIN_EXPORT	23	0.295901	1.69493	0.030303	0.0879739	0.909	8879	tags=83%, list=53%, signal=176%		KEGG_COMPLEMENT_AND_COAGULATION_CASCADES	62	-0.122133	-1.14017	0.289062	0.371296	1	12811	tags=89%, list=77%, signal=377%
KEGG_GALACTOSE_METABOLISM	22	-0.194894	-1.10867	0.302772	0.475248	1	6633	tags=59%, list=40%, signal=98%		KEGG_PROTEIN_EXPORT	23	0.20858	1.2304	0.22314	0.420794	1	13249	tags=100%, list=79%, signal=479%		KEGG_LEUKOCYTE_TRANSENDOTHELIAL_MIGRATION	107	0.099403	1.22057	0.209446	0.293998	1	6323	tags=48%, list=38%, signal=76%		KEGG_GLUTATHIONE_METABOLISM	41	0.220861	1.67001	0.0250522	0.0958133	0.927	7333	tags=66%, list=44%, signal=117%		KEGG_PHENYLALANINE_METABOLISM	17	-0.220151	-1.13236	0.313684	0.37212	1	6165	tags=59%, list=37%, signal=93%
KEGG_FRUCTOSE_AND_MANNOSE_METABOLISM	32	-0.161758	-1.1091	0.297244	0.481087	1	8805	tags=69%, list=53%, signal=145%		KEGG_RNA_DEGRADATION	53	0.142856	1.24094	0.190083	0.42421	1	11194	tags=81%, list=67%, signal=244%		KEGG_ETHER_LIPID_METABOLISM	26	0.195572	1.22073	0.227626	0.29686	1	5099	tags=50%, list=30%, signal=72%		KEGG_GLYCOLYSIS_GLUCONEOGENESIS	55	0.188247	1.65887	0.0308285	0.0981577	0.945	5379	tags=51%, list=32%, signal=75%		KEGG_TYPE_I_DIABETES_MELLITUS	36	-0.161843	-1.14261	0.269155	0.377465	1	6596	tags=56%, list=39%, signal=91%
KEGG_ABC_TRANSPORTERS	40	-0.145304	-1.07918	0.380952	0.515094	1	12219	tags=88%, list=73%, signal=323%		KEGG_GLYCOSYLPHOSPHATIDYLINOSITOL_GPI_ANCHOR_BIOSYNTHESIS	25	-0.187196	-1.10887	0.332661	0.431097	1	10931	tags=84%, list=65%, signal=242%		KEGG_GLYCEROLIPID_METABOLISM	43	0.15743	1.21465	0.219008	0.296934	1	4766	tags=44%, list=28%, signal=62%		KEGG_GLYCOSAMINOGLYCAN_DEGRADATION	19	0.311165	1.63816	0.0315582	0.104464	0.958	1844	tags=42%, list=11%, signal=47%		KEGG_FOCAL_ADHESION	193	-0.0685543	-1.11121	0.313929	0.380757	1	9793	tags=65%, list=59%, signal=156%
KEGG_BASE_EXCISION_REPAIR	33	-0.156016	-1.06824	0.335391	0.525691	1	10581	tags=79%, list=63%, signal=214%		KEGG_BASE_EXCISION_REPAIR	33	0.179422	1.2107	0.208589	0.432553	1	6638	tags=58%, list=40%, signal=95%		KEGG_GLYOXYLATE_AND_DICARBOXYLATE_METABOLISM	15	0.255675	1.20992	0.231237	0.299001	1	3534	tags=47%, list=21%, signal=59%		KEGG_PENTOSE_PHOSPHATE_PATHWAY	25	0.269743	1.61967	0.0389105	0.111159	0.968	10219	tags=88%, list=61%, signal=226%		KEGG_ARRHYTHMOGENIC_RIGHT_VENTRICULAR_CARDIOMYOPATHY_ARVC	69	-0.113219	-1.11846	0.305927	0.380846	1	7816	tags=58%, list=47%, signal=108%
KEGG_PORPHYRIN_AND_CHLOROPHYLL_METABOLISM	28	-0.167901	-1.05523	0.368836	0.533031	1	9150	tags=71%, list=55%, signal=157%		KEGG_MISMATCH_REPAIR	23	0.20876	1.1881	0.247423	0.449489	1	13246	tags=100%, list=79%, signal=479%		KEGG_CELL_ADHESION_MOLECULES_CAMS	123	-0.100412	-1.32294	0.138943	0.31619	1	9082	tags=64%, list=54%, signal=139%		KEGG_CHRONIC_MYELOID_LEUKEMIA	71	0.158555	1.55457	0.0516529	0.148703	0.993	7964	tags=63%, list=48%, signal=120%		KEGG_LEUKOCYTE_TRANSENDOTHELIAL_MIGRATION	107	-0.0974578	-1.16858	0.292735	0.385169	1	4324	tags=36%, list=26%, signal=48%
KEGG_APOPTOSIS	84	-0.0978633	-1.05616	0.366864	0.538173	1	4747	tags=38%, list=28%, signal=53%		KEGG_PENTOSE_PHOSPHATE_PATHWAY	25	-0.17739	-1.06575	0.353061	0.482694	1	9756	tags=76%, list=58%, signal=182%		KEGG_WNT_SIGNALING_PATHWAY	139	-0.0977857	-1.3312	0.142566	0.324311	1	4639	tags=37%, list=28%, signal=51%		KEGG_ENDOMETRIAL_CANCER	52	0.178481	1.54671	0.0541082	0.149807	0.994	7964	tags=65%, list=48%, signal=124%		KEGG_INTESTINAL_IMMUNE_NETWORK_FOR_IGA_PRODUCTION	41	-0.152447	-1.1442	0.2625	0.385343	1	6028	tags=51%, list=36%, signal=80%
KEGG_GLYCOSPHINGOLIPID_BIOSYNTHESIS_LACTO_AND_NEOLACTO_SERIES	22	-0.181187	-1.03009	0.394422	0.568964	1	1537	tags=27%, list=9%, signal=30%		KEGG_FATTY_ACID_METABOLISM	39	-0.140068	-1.05936	0.374745	0.487104	1	10107	tags=74%, list=60%, signal=187%		KEGG_PHOSPHATIDYLINOSITOL_SIGNALING_SYSTEM	72	0.120319	1.18337	0.254509	0.325034	1	12638	tags=88%, list=76%, signal=356%		KEGG_LYSINE_DEGRADATION	44	0.194045	1.49886	0.0559006	0.180633	0.999	5128	tags=50%, list=31%, signal=72%		KEGG_GLYCOSAMINOGLYCAN_BIOSYNTHESIS_HEPARAN_SULFATE	21	-0.208926	-1.1512	0.284254	0.386639	1	10057	tags=81%, list=60%, signal=203%
KEGG_NOTCH_SIGNALING_PATHWAY	46	-0.1245	-1.00598	0.440644	0.59669	1	2289	tags=26%, list=14%, signal=30%		KEGG_ARRHYTHMOGENIC_RIGHT_VENTRICULAR_CARDIOMYOPATHY_ARVC	69	-0.11026	-1.06596	0.358527	0.487801	1	1559	tags=20%, list=9%, signal=22%		KEGG_TYROSINE_METABOLISM	38	-0.173882	-1.27178	0.173824	0.331172	1	11191	tags=84%, list=67%, signal=254%		KEGG_PYRUVATE_METABOLISM	40	0.200419	1.49455	0.0761719	0.178485	0.999	8368	tags=70%, list=50%, signal=140%		KEGG_GLYCOSPHINGOLIPID_BIOSYNTHESIS_LACTO_AND_NEOLACTO_SERIES	22	-0.20804	-1.15522	0.266798	0.391731	1	7174	tags=64%, list=43%, signal=111%
KEGG_BIOSYNTHESIS_OF_UNSATURATED_FATTY_ACIDS	21	-0.178895	-0.992683	0.436874	0.596715	1	9762	tags=76%, list=58%, signal=183%		KEGG_O_GLYCAN_BIOSYNTHESIS	27	-0.171385	-1.05381	0.386503	0.490408	1	2716	tags=33%, list=16%, signal=40%		KEGG_GNRH_SIGNALING_PATHWAY	87	-0.119112	-1.29381	0.16185	0.335625	1	2250	tags=25%, list=13%, signal=29%		KEGG_P53_SIGNALING_PATHWAY	66	0.153926	1.48784	0.0787402	0.179153	0.999	10619	tags=79%, list=63%, signal=215%		KEGG_SPHINGOLIPID_METABOLISM	36	-0.16684	-1.16991	0.232955	0.394758	1	13021	tags=94%, list=78%, signal=425%
KEGG_MELANOMA	61	-0.106481	-0.994798	0.456349	0.600731	1	3987	tags=34%, list=24%, signal=45%		KEGG_PENTOSE_AND_GLUCURONATE_INTERCONVERSIONS	17	-0.20936	-1.04098	0.375228	0.505076	1	3392	tags=41%, list=20%, signal=52%		KEGG_VIRAL_MYOCARDITIS	65	0.120512	1.16363	0.262195	0.342039	1	2882	tags=29%, list=17%, signal=35%		KEGG_HOMOLOGOUS_RECOMBINATION	28	0.234208	1.44622	0.0918164	0.211038	1	6247	tags=61%, list=37%, signal=97%		KEGG_TYPE_II_DIABETES_MELLITUS	42	-0.14001	-1.0787	0.307692	0.413592	1	8821	tags=67%, list=53%, signal=141%
KEGG_GLYCINE_SERINE_AND_THREONINE_METABOLISM	28	-0.162403	-1.00607	0.423077	0.603905	1	11035	tags=82%, list=66%, signal=241%		KEGG_PURINE_METABOLISM	151	0.0752975	1.10711	0.310757	0.511464	1	12937	tags=85%, list=77%, signal=370%		KEGG_BLADDER_CANCER	42	0.154238	1.16489	0.270833	0.343849	1	8183	tags=64%, list=49%, signal=125%		KEGG_PROGESTERONE_MEDIATED_OOCYTE_MATURATION	82	0.135309	1.43244	0.0730337	0.216699	1	11216	tags=80%, list=67%, signal=243%		KEGG_VIBRIO_CHOLERAE_INFECTION	53	0.133697	1.15431	0.284519	0.414098	1	4084	tags=38%, list=24%, signal=50%
KEGG_TIGHT_JUNCTION	120	-0.0782178	-0.996394	0.451243	0.60584	1	12648	tags=83%, list=76%, signal=339%		KEGG_AXON_GUIDANCE	124	-0.0784548	-1.02657	0.432271	0.515949	1	14219	tags=93%, list=85%, signal=612%		KEGG_SPHINGOLIPID_METABOLISM	36	-0.177791	-1.27312	0.180583	0.345571	1	9119	tags=72%, list=54%, signal=158%		KEGG_FATTY_ACID_METABOLISM	39	0.194268	1.42829	0.103175	0.215144	1	5767	tags=54%, list=34%, signal=82%		KEGG_DORSO_VENTRAL_AXIS_FORMATION	21	0.21074	1.13002	0.299163	0.443938	1	4446	tags=48%, list=27%, signal=65%
KEGG_TGF_BETA_SIGNALING_PATHWAY	83	0.093603	1.01501	0.435039	0.618168	1	2473	tags=24%, list=15%, signal=28%		KEGG_VASOPRESSIN_REGULATED_WATER_REABSORPTION	42	-0.135078	-1.02974	0.390805	0.516486	1	14482	tags=100%, list=87%, signal=741%		KEGG_ARACHIDONIC_ACID_METABOLISM	43	-0.159772	-1.24421	0.213992	0.349091	1	8621	tags=67%, list=52%, signal=139%		KEGG_NEUROTROPHIN_SIGNALING_PATHWAY	120	0.113541	1.42786	0.085595	0.210318	1	8154	tags=60%, list=49%, signal=116%		KEGG_MTOR_SIGNALING_PATHWAY	50	0.133189	1.11039	0.321285	0.467281	1	12839	tags=90%, list=77%, signal=385%
KEGG_ETHER_LIPID_METABOLISM	26	-0.161373	-0.974083	0.477366	0.620303	1	10822	tags=81%, list=65%, signal=228%		KEGG_SELENOAMINO_ACID_METABOLISM	23	0.189306	1.08118	0.343254	0.518751	1	3384	tags=39%, list=20%, signal=49%		KEGG_RIG_I_LIKE_RECEPTOR_SIGNALING_PATHWAY	56	0.130747	1.13979	0.298211	0.366614	1	12761	tags=89%, list=76%, signal=375%		KEGG_STEROID_BIOSYNTHESIS	16	0.292225	1.40848	0.100806	0.222262	1	8711	tags=81%, list=52%, signal=169%		KEGG_AUTOIMMUNE_THYROID_DISEASE	34	-0.148668	-1.02906	0.388446	0.471768	1	3917	tags=38%, list=23%, signal=50%
KEGG_GLYCOSAMINOGLYCAN_DEGRADATION	19	0.196352	1.01872	0.431772	0.628244	1	5525	tags=53%, list=33%, signal=78%		KEGG_PHENYLALANINE_METABOLISM	17	0.219648	1.06977	0.37251	0.521442	1	3218	tags=41%, list=19%, signal=51%		KEGG_GLYCINE_SERINE_AND_THREONINE_METABOLISM	28	-0.195527	-1.18923	0.228866	0.406952	1	7493	tags=64%, list=45%, signal=116%		KEGG_CARDIAC_MUSCLE_CONTRACTION	63	0.149002	1.36674	0.124	0.256389	1	3359	tags=35%, list=20%, signal=44%		KEGG_BIOSYNTHESIS_OF_UNSATURATED_FATTY_ACIDS	21	0.2039	1.09687	0.347561	0.482646	1	10139	tags=81%, list=61%, signal=205%
KEGG_ACUTE_MYELOID_LEUKEMIA	57	-0.103169	-0.948792	0.506122	0.655097	1	1510	tags=19%, list=9%, signal=21%		KEGG_GLYCOSAMINOGLYCAN_BIOSYNTHESIS_CHONDROITIN_SULFATE	22	0.187513	1.04661	0.364729	0.526704	1	2190	tags=32%, list=13%, signal=37%		KEGG_GLYCOSAMINOGLYCAN_BIOSYNTHESIS_CHONDROITIN_SULFATE	22	-0.208965	-1.16965	0.257085	0.417108	1	8680	tags=73%, list=52%, signal=151%		KEGG_BASAL_TRANSCRIPTION_FACTORS	33	0.196051	1.34486	0.131579	0.272876	1	8896	tags=73%, list=53%, signal=155%		KEGG_FC_GAMMA_R_MEDIATED_PHAGOCYTOSIS	92	0.0965696	1.06995	0.374745	0.512965	1	4031	tags=34%, list=24%, signal=44%
KEGG_STARCH_AND_SUCROSE_METABOLISM	34	-0.135644	-0.940199	0.482105	0.662499	1	13487	tags=94%, list=81%, signal=484%		KEGG_PRION_DISEASES	33	0.163607	1.10805	0.340551	0.527831	1	6395	tags=55%, list=38%, signal=88%		KEGG_FRUCTOSE_AND_MANNOSE_METABOLISM	32	0.163254	1.09626	0.323471	0.417587	1	4071	tags=41%, list=24%, signal=54%		KEGG_RENAL_CELL_CARCINOMA	70	0.131632	1.29704	0.184426	0.32105	1	8325	tags=63%, list=50%, signal=125%		KEGG_PROSTATE_CANCER	86	0.097511	1.07313	0.352601	0.514362	1	13360	tags=90%, list=80%, signal=442%
KEGG_LONG_TERM_DEPRESSION	61	-0.101497	-0.934586	0.522822	0.664746	1	6265	tags=48%, list=37%, signal=76%		KEGG_NUCLEOTIDE_EXCISION_REPAIR	44	0.143417	1.12806	0.30426	0.531238	1	13200	tags=93%, list=79%, signal=440%		KEGG_JAK_STAT_SIGNALING_PATHWAY	123	0.0840085	1.0785	0.346008	0.437762	1	12482	tags=83%, list=75%, signal=324%		KEGG_COLORECTAL_CANCER	62	0.135554	1.25219	0.19057	0.370826	1	9346	tags=69%, list=56%, signal=156%		KEGG_ERBB_SIGNALING_PATHWAY	84	0.0992931	1.06081	0.359918	0.521098	1	12093	tags=82%, list=72%, signal=295%
KEGG_VEGF_SIGNALING_PATHWAY	68	-0.0933949	-0.920442	0.552182	0.667493	1	12473	tags=84%, list=75%, signal=328%		KEGG_CELL_CYCLE	124	0.0803189	1.05358	0.367906	0.531744	1	14321	tags=94%, list=86%, signal=643%		KEGG_TGF_BETA_SIGNALING_PATHWAY	83	-0.107113	-1.13576	0.320487	0.448377	1	9509	tags=67%, list=57%, signal=155%		KEGG_ONE_CARBON_POOL_BY_FOLATE	17	0.24459	1.23522	0.182403	0.386462	1	2801	tags=41%, list=17%, signal=49%		KEGG_DRUG_METABOLISM_OTHER_ENZYMES	35	0.150732	1.04605	0.382413	0.530687	1	1307	tags=23%, list=8%, signal=25%
KEGG_HISTIDINE_METABOLISM	27	-0.151198	-0.921282	0.550696	0.673306	1	4293	tags=41%, list=26%, signal=55%		KEGG_STEROID_HORMONE_BIOSYNTHESIS	35	0.153948	1.08189	0.324	0.534787	1	6035	tags=51%, list=36%, signal=80%		KEGG_COMPLEMENT_AND_COAGULATION_CASCADES	62	0.113712	1.05441	0.38	0.462553	1	2152	tags=24%, list=13%, signal=28%		KEGG_GLIOMA	61	0.134703	1.22738	0.21308	0.389353	1	6258	tags=51%, list=37%, signal=81%		KEGG_SMALL_CELL_LUNG_CANCER	83	0.0971263	1.04732	0.368421	0.535381	1	14311	tags=95%, list=86%, signal=654%
KEGG_RETINOL_METABOLISM	39	-0.126107	-0.910629	0.574257	0.676825	1	13344	tags=92%, list=80%, signal=454%		KEGG_CITRATE_CYCLE_TCA_CYCLE	30	0.174021	1.10839	0.321499	0.546941	1	8807	tags=70%, list=53%, signal=147%		KEGG_DORSO_VENTRAL_AXIS_FORMATION	21	0.189377	1.05745	0.369781	0.462665	1	6397	tags=57%, list=38%, signal=92%		KEGG_BUTANOATE_METABOLISM	31	0.181296	1.20937	0.251613	0.40629	1	7228	tags=61%, list=43%, signal=108%		KEGG_ETHER_LIPID_METABOLISM	26	-0.156364	-0.957035	0.508368	0.567159	1	1894	tags=27%, list=11%, signal=30%
KEGG_O_GLYCAN_BIOSYNTHESIS	27	-0.150258	-0.92165	0.554639	0.679989	1	3069	tags=33%, list=18%, signal=41%		KEGG_P53_SIGNALING_PATHWAY	66	-0.102961	-0.99941	0.462451	0.552572	1	2849	tags=27%, list=17%, signal=33%		KEGG_NOTCH_SIGNALING_PATHWAY	46	0.129132	1.05138	0.395711	0.462735	1	12033	tags=85%, list=72%, signal=301%		KEGG_GLYOXYLATE_AND_DICARBOXYLATE_METABOLISM	15	0.257198	1.19704	0.232824	0.415153	1	5740	tags=60%, list=34%, signal=91%		KEGG_HISTIDINE_METABOLISM	27	-0.150453	-0.935284	0.519348	0.587148	1	6165	tags=52%, list=37%, signal=82%
KEGG_NITROGEN_METABOLISM	20	-0.165889	-0.887186	0.591195	0.701429	1	1412	tags=25%, list=8%, signal=27%		KEGG_ONE_CARBON_POOL_BY_FOLATE	17	0.210381	1.01655	0.442656	0.559745	1	1404	tags=29%, list=8%, signal=32%		KEGG_TYPE_II_DIABETES_MELLITUS	42	0.137674	1.04757	0.390291	0.463103	1	8858	tags=67%, list=53%, signal=141%		KEGG_PANCREATIC_CANCER	70	0.119971	1.18846	0.247881	0.418655	1	7563	tags=57%, list=45%, signal=104%		KEGG_PATHWAYS_IN_CANCER	306	0.0488378	0.996115	0.425573	0.593173	1	1439	tags=13%, list=9%, signal=14%
KEGG_ALDOSTERONE_REGULATED_SODIUM_REABSORPTION	38	-0.120352	-0.889715	0.608696	0.704539	1	11204	tags=79%, list=67%, signal=238%		KEGG_BUTANOATE_METABOLISM	31	-0.148063	-0.984877	0.470103	0.562556	1	12644	tags=90%, list=76%, signal=369%		KEGG_ALLOGRAFT_REJECTION	31	0.154339	1.02844	0.416834	0.481026	1	660	tags=19%, list=4%, signal=20%		KEGG_PROPANOATE_METABOLISM	32	0.175826	1.17598	0.249524	0.428317	1	10660	tags=81%, list=64%, signal=223%		KEGG_ARGININE_AND_PROLINE_METABOLISM	50	0.118682	0.997141	0.442085	0.598155	1	8395	tags=62%, list=50%, signal=124%
KEGG_ENDOMETRIAL_CANCER	52	0.112729	0.957707	0.482759	0.708643	1	9061	tags=65%, list=54%, signal=142%		KEGG_PYRUVATE_METABOLISM	40	-0.13293	-0.988507	0.449898	0.563337	1	12844	tags=90%, list=77%, signal=386%		KEGG_STEROID_BIOSYNTHESIS	16	0.214593	1.03122	0.39924	0.481899	1	6871	tags=63%, list=41%, signal=106%		KEGG_TYROSINE_METABOLISM	38	0.152568	1.1361	0.287823	0.479375	1	5379	tags=47%, list=32%, signal=70%		KEGG_GLYCOSAMINOGLYCAN_DEGRADATION	19	0.187288	0.998103	0.416499	0.603478	1	3034	tags=37%, list=18%, signal=45%
KEGG_PYRIMIDINE_METABOLISM	96	0.0774239	0.90748	0.547758	0.731767	1	5161	tags=39%, list=31%, signal=55%		KEGG_BETA_ALANINE_METABOLISM	21	-0.176035	-0.979295	0.471624	0.565767	1	6622	tags=57%, list=40%, signal=94%		KEGG_ABC_TRANSPORTERS	40	-0.145053	-1.08869	0.337423	0.483564	1	2600	tags=30%, list=16%, signal=35%		KEGG_ARGININE_AND_PROLINE_METABOLISM	50	0.124502	1.05901	0.356	0.60187	1	6959	tags=54%, list=42%, signal=92%		KEGG_LEISHMANIA_INFECTION	66	0.101512	0.983126	0.466	0.608164	1	10732	tags=74%, list=64%, signal=206%
KEGG_ARGININE_AND_PROLINE_METABOLISM	50	0.107422	0.895014	0.613027	0.736965	1	7244	tags=54%, list=43%, signal=95%		KEGG_ALANINE_ASPARTATE_AND_GLUTAMATE_METABOLISM	27	0.15719	0.982242	0.467871	0.569579	1	7910	tags=63%, list=47%, signal=119%		KEGG_FOCAL_ADHESION	193	0.0625003	1.01792	0.42485	0.491545	1	9024	tags=60%, list=54%, signal=129%		KEGG_RIG_I_LIKE_RECEPTOR_SIGNALING_PATHWAY	56	0.117866	1.04798	0.394309	0.610297	1	8493	tags=63%, list=51%, signal=126%		KEGG_PROXIMAL_TUBULE_BICARBONATE_RECLAMATION	22	-0.160812	-0.910012	0.559454	0.613795	1	3399	tags=36%, list=20%, signal=46%
KEGG_CHRONIC_MYELOID_LEUKEMIA	71	0.0887041	0.883673	0.593633	0.741519	1	13371	tags=89%, list=80%, signal=439%		KEGG_NOTCH_SIGNALING_PATHWAY	46	-0.121906	-0.972134	0.485772	0.570666	1	9245	tags=67%, list=55%, signal=150%		KEGG_DILATED_CARDIOMYOPATHY	81	-0.103607	-1.09478	0.302857	0.49274	1	2821	tags=27%, list=17%, signal=33%		KEGG_O_GLYCAN_BIOSYNTHESIS	27	0.165673	1.04545	0.380252	0.603998	1	4669	tags=44%, list=28%, signal=62%		KEGG_GLYCEROPHOSPHOLIPID_METABOLISM	68	0.0994826	0.968188	0.478175	0.626963	1	4986	tags=40%, list=30%, signal=56%
KEGG_VASOPRESSIN_REGULATED_WATER_REABSORPTION	42	0.119456	0.910162	0.534591	0.744525	1	11553	tags=81%, list=69%, signal=261%		KEGG_OOCYTE_MEIOSIS	104	0.0807665	0.952432	0.49004	0.573554	1	14748	tags=96%, list=88%, signal=804%		KEGG_ALANINE_ASPARTATE_AND_GLUTAMATE_METABOLISM	27	0.165209	1.0143	0.423387	0.492942	1	7776	tags=63%, list=46%, signal=117%		KEGG_AMYOTROPHIC_LATERAL_SCLEROSIS_ALS	49	0.127579	1.02451	0.421907	0.631975	1	4018	tags=37%, list=24%, signal=48%		KEGG_PRION_DISEASES	33	0.138406	0.960185	0.496994	0.633158	1	10366	tags=76%, list=62%, signal=199%
KEGG_DRUG_METABOLISM_OTHER_ENZYMES	35	-0.119965	-0.849676	0.663918	0.749596	1	2301	tags=26%, list=14%, signal=30%		KEGG_VIRAL_MYOCARDITIS	65	0.103557	0.998084	0.435039	0.574461	1	4967	tags=40%, list=30%, signal=57%		KEGG_VEGF_SIGNALING_PATHWAY	68	0.104914	1.00781	0.435798	0.497889	1	8095	tags=59%, list=48%, signal=113%		KEGG_GLYCOSPHINGOLIPID_BIOSYNTHESIS_GANGLIO_SERIES	15	0.207141	0.980137	0.458333	0.7052	1	6577	tags=60%, list=39%, signal=99%		KEGG_THYROID_CANCER	28	0.141438	0.913381	0.559499	0.693243	1	3613	tags=36%, list=22%, signal=45%
KEGG_AMYOTROPHIC_LATERAL_SCLEROSIS_ALS	49	-0.10348	-0.852321	0.650485	0.752889	1	6813	tags=51%, list=41%, signal=86%		KEGG_FRUCTOSE_AND_MANNOSE_METABOLISM	32	0.140864	0.941664	0.493927	0.575435	1	5491	tags=47%, list=33%, signal=70%		KEGG_PHENYLALANINE_METABOLISM	17	-0.213952	-1.06248	0.354207	0.50512	1	11191	tags=88%, list=67%, signal=266%		KEGG_VASOPRESSIN_REGULATED_WATER_REABSORPTION	42	0.123945	0.958679	0.5	0.734979	1	3907	tags=36%, list=23%, signal=46%		KEGG_ADHERENS_JUNCTION	73	0.091613	0.915506	0.544555	0.697094	1	5121	tags=40%, list=31%, signal=57%
KEGG_SPHINGOLIPID_METABOLISM	36	0.128849	0.912055	0.563525	0.759189	1	2961	tags=31%, list=18%, signal=37%		KEGG_CYSTEINE_AND_METHIONINE_METABOLISM	32	0.142122	0.955396	0.502058	0.583028	1	6516	tags=53%, list=39%, signal=87%		KEGG_PANTOTHENATE_AND_COA_BIOSYNTHESIS	16	0.20006	0.998041	0.460501	0.506892	1	11298	tags=88%, list=68%, signal=269%		KEGG_LONG_TERM_POTENTIATION	65	0.0988552	0.95422	0.491194	0.730727	1	3758	tags=32%, list=22%, signal=42%		KEGG_NON_SMALL_CELL_LUNG_CANCER	53	0.104786	0.905255	0.563265	0.69992	1	3619	tags=32%, list=22%, signal=41%
KEGG_PANTOTHENATE_AND_COA_BIOSYNTHESIS	16	-0.173206	-0.836637	0.68815	0.763226	1	3381	tags=38%, list=20%, signal=47%		KEGG_GLYCOSAMINOGLYCAN_DEGRADATION	19	0.182767	0.982657	0.471074	0.584169	1	11918	tags=89%, list=71%, signal=310%		KEGG_AMYOTROPHIC_LATERAL_SCLEROSIS_ALS	49	0.120175	0.991731	0.447316	0.511264	1	3800	tags=35%, list=23%, signal=45%		KEGG_BLADDER_CANCER	42	0.121863	0.947542	0.5	0.730565	1	8325	tags=62%, list=50%, signal=123%		KEGG_GRAFT_VERSUS_HOST_DISEASE	35	0.131243	0.916228	0.559499	0.703687	1	3067	tags=31%, list=18%, signal=38%
KEGG_VIBRIO_CHOLERAE_INFECTION	53	0.108344	0.918986	0.545627	0.764827	1	1665	tags=21%, list=10%, signal=23%		KEGG_DRUG_METABOLISM_OTHER_ENZYMES	35	0.136043	0.958051	0.471074	0.593899	1	3465	tags=34%, list=21%, signal=43%		KEGG_REGULATION_OF_AUTOPHAGY	22	0.167758	0.97059	0.455253	0.538101	1	8606	tags=68%, list=51%, signal=140%		KEGG_APOPTOSIS	84	0.0846316	0.912354	0.570588	0.788355	1	10544	tags=71%, list=63%, signal=192%		KEGG_VIRAL_MYOCARDITIS	65	0.0919404	0.883205	0.574713	0.716074	1	6963	tags=51%, list=42%, signal=87%
KEGG_NICOTINATE_AND_NICOTINAMIDE_METABOLISM	23	-0.14076	-0.830005	0.672032	0.766786	1	4925	tags=43%, list=29%, signal=62%		KEGG_PROGESTERONE_MEDIATED_OOCYTE_MATURATION	82	-0.0877604	-0.94024	0.5	0.616167	1	10173	tags=70%, list=61%, signal=176%		KEGG_AUTOIMMUNE_THYROID_DISEASE	34	0.137254	0.952314	0.496868	0.560692	1	660	tags=18%, list=4%, signal=18%		KEGG_TOLL_LIKE_RECEPTOR_SIGNALING_PATHWAY	90	0.080871	0.905346	0.572565	0.789864	1	14645	tags=96%, list=88%, signal=761%		KEGG_O_GLYCAN_BIOSYNTHESIS	27	-0.135166	-0.823277	0.670565	0.720535	1	8280	tags=63%, list=49%, signal=124%
KEGG_RIG_I_LIKE_RECEPTOR_SIGNALING_PATHWAY	56	0.0966256	0.851724	0.645875	0.779507	1	13629	tags=91%, list=81%, signal=489%		KEGG_BLADDER_CANCER	42	-0.116646	-0.913994	0.574113	0.65275	1	10008	tags=71%, list=60%, signal=177%		KEGG_GLYCOSAMINOGLYCAN_DEGRADATION	19	0.180443	0.945672	0.542969	0.561571	1	11076	tags=84%, list=66%, signal=249%		KEGG_EPITHELIAL_CELL_SIGNALING_IN_HELICOBACTER_PYLORI_INFECTION	66	0.0950246	0.903633	0.57085	0.780601	1	10333	tags=71%, list=62%, signal=185%		KEGG_GLYCOSPHINGOLIPID_BIOSYNTHESIS_GANGLIO_SERIES	15	0.191392	0.889082	0.578218	0.721402	1	12419	tags=93%, list=74%, signal=362%
KEGG_LONG_TERM_POTENTIATION	65	-0.0856134	-0.800444	0.709125	0.782016	1	6813	tags=49%, list=41%, signal=83%		KEGG_LYSINE_DEGRADATION	44	0.107482	0.839139	0.670565	0.705516	1	11898	tags=82%, list=71%, signal=282%		KEGG_NICOTINATE_AND_NICOTINAMIDE_METABOLISM	23	0.164457	0.946476	0.510806	0.565352	1	2344	tags=30%, list=14%, signal=35%		KEGG_SELENOAMINO_ACID_METABOLISM	23	0.155099	0.884991	0.6	0.804069	1	5411	tags=48%, list=32%, signal=71%		KEGG_PRIMARY_IMMUNODEFICIENCY	34	0.130347	0.884047	0.58871	0.722316	1	4221	tags=38%, list=25%, signal=51%
KEGG_TYROSINE_METABOLISM	38	-0.108497	-0.815704	0.697417	0.782133	1	8319	tags=61%, list=50%, signal=120%		KEGG_CARDIAC_MUSCLE_CONTRACTION	63	0.0908369	0.840207	0.636364	0.719851	1	6454	tags=48%, list=39%, signal=77%		KEGG_VASCULAR_SMOOTH_MUSCLE_CONTRACTION	99	-0.0865547	-1.01172	0.433198	0.56841	1	1942	tags=20%, list=12%, signal=23%		KEGG_CYTOSOLIC_DNA_SENSING_PATHWAY	42	0.113502	0.868177	0.587332	0.823608	1	9660	tags=69%, list=58%, signal=163%		KEGG_LONG_TERM_DEPRESSION	61	-0.0889336	-0.82489	0.694716	0.732063	1	1536	tags=18%, list=9%, signal=20%
KEGG_CYTOSOLIC_DNA_SENSING_PATHWAY	42	-0.105082	-0.809929	0.695122	0.783231	1	2630	tags=26%, list=16%, signal=31%		KEGG_CALCIUM_SIGNALING_PATHWAY	153	-0.0598672	-0.854928	0.628253	0.74454	1	8306	tags=56%, list=50%, signal=109%		KEGG_HYPERTROPHIC_CARDIOMYOPATHY_HCM	74	-0.09755	-0.961286	0.490982	0.592911	1	12850	tags=86%, list=77%, signal=371%		KEGG_PRION_DISEASES	33	0.125448	0.864486	0.627255	0.818798	1	2468	tags=27%, list=15%, signal=32%		KEGG_VASOPRESSIN_REGULATED_WATER_REABSORPTION	42	0.110376	0.859798	0.633333	0.747234	1	4532	tags=38%, list=27%, signal=52%
KEGG_PURINE_METABOLISM	151	-0.0557693	-0.801458	0.709091	0.788259	1	9162	tags=60%, list=55%, signal=132%		KEGG_AMYOTROPHIC_LATERAL_SCLEROSIS_ALS	49	-0.103259	-0.848386	0.632463	0.747823	1	8866	tags=63%, list=53%, signal=134%		KEGG_TYPE_I_DIABETES_MELLITUS	36	0.127445	0.908799	0.549495	0.601369	1	660	tags=17%, list=4%, signal=17%		KEGG_BIOSYNTHESIS_OF_UNSATURATED_FATTY_ACIDS	21	0.160614	0.858137	0.618661	0.818617	1	2893	tags=33%, list=17%, signal=40%		KEGG_B_CELL_RECEPTOR_SIGNALING_PATHWAY	74	0.0851152	0.85507	0.643969	0.747508	1	5818	tags=43%, list=35%, signal=66%
KEGG_LYSOSOME	119	0.0618836	0.789112	0.739479	0.833266	1	7409	tags=50%, list=44%, signal=90%		KEGG_HYPERTROPHIC_CARDIOMYOPATHY_HCM	74	-0.0848297	-0.843666	0.664694	0.748884	1	1980	tags=20%, list=12%, signal=23%		KEGG_ERBB_SIGNALING_PATHWAY	84	0.0838138	0.91074	0.552326	0.603207	1	8366	tags=58%, list=50%, signal=116%		KEGG_SPHINGOLIPID_METABOLISM	36	0.116707	0.84589	0.646484	0.830373	1	10602	tags=75%, list=63%, signal=204%		KEGG_ALDOSTERONE_REGULATED_SODIUM_REABSORPTION	38	-0.109815	-0.792533	0.69428	0.7529	1	8297	tags=61%, list=50%, signal=120%
KEGG_BUTANOATE_METABOLISM	31	0.122374	0.794304	0.716	0.842167	1	13611	tags=94%, list=81%, signal=500%		KEGG_ECM_RECEPTOR_INTERACTION	83	-0.0790596	-0.837077	0.657534	0.753411	1	1709	tags=18%, list=10%, signal=20%		KEGG_DRUG_METABOLISM_OTHER_ENZYMES	35	0.126973	0.912655	0.568	0.605585	1	5051	tags=43%, list=30%, signal=61%		KEGG_AMINO_SUGAR_AND_NUCLEOTIDE_SUGAR_METABOLISM	41	0.107447	0.831026	0.681188	0.845881	1	12492	tags=85%, list=75%, signal=336%		KEGG_ALANINE_ASPARTATE_AND_GLUTAMATE_METABOLISM	27	0.133071	0.841157	0.663968	0.754956	1	8313	tags=63%, list=50%, signal=125%
KEGG_P53_SIGNALING_PATHWAY	66	0.080164	0.768739	0.756335	0.84895	1	1452	tags=17%, list=9%, signal=18%		KEGG_RNA_POLYMERASE	28	0.115129	0.726087	0.84	0.850841	1	9432	tags=68%, list=56%, signal=155%		KEGG_GLYCOSPHINGOLIPID_BIOSYNTHESIS_LACTO_AND_NEOLACTO_SERIES	22	-0.172648	-0.962673	0.504931	0.609613	1	9287	tags=73%, list=55%, signal=163%		KEGG_VIRAL_MYOCARDITIS	65	0.0876105	0.830475	0.666667	0.834859	1	9095	tags=63%, list=54%, signal=138%		KEGG_GLYCEROLIPID_METABOLISM	43	0.111296	0.843847	0.637295	0.758255	1	9039	tags=65%, list=54%, signal=141%
KEGG_PENTOSE_AND_GLUCURONATE_INTERCONVERSIONS	17	0.16099	0.797115	0.709611	0.855208	1	11090	tags=82%, list=66%, signal=244%		KEGG_DILATED_CARDIOMYOPATHY	81	-0.0729822	-0.752321	0.791411	0.87943	1	4984	tags=37%, list=30%, signal=52%		KEGG_GLYCOSAMINOGLYCAN_BIOSYNTHESIS_HEPARAN_SULFATE	21	-0.176673	-0.96965	0.483673	0.61766	1	12190	tags=90%, list=73%, signal=333%		KEGG_SNARE_INTERACTIONS_IN_VESICULAR_TRANSPORT	38	0.111977	0.818325	0.680556	0.844413	1	10461	tags=74%, list=63%, signal=196%		KEGG_BETA_ALANINE_METABOLISM	21	-0.132963	-0.736355	0.807771	0.817418	1	6545	tags=52%, list=39%, signal=86%
KEGG_BASAL_CELL_CARCINOMA	49	-0.0886539	-0.745497	0.79089	0.856109	1	4328	tags=35%, list=26%, signal=47%		KEGG_THYROID_CANCER	28	-0.116548	-0.730109	0.803571	0.903952	1	10008	tags=71%, list=60%, signal=177%		KEGG_O_GLYCAN_BIOSYNTHESIS	27	-0.142212	-0.889656	0.604839	0.653913	1	5063	tags=44%, list=30%, signal=64%		KEGG_DRUG_METABOLISM_OTHER_ENZYMES	35	0.118149	0.807374	0.702087	0.851457	1	1373	tags=20%, list=8%, signal=22%		KEGG_FRUCTOSE_AND_MANNOSE_METABOLISM	32	0.117756	0.792046	0.722458	0.827429	1	8492	tags=63%, list=51%, signal=127%
KEGG_INOSITOL_PHOSPHATE_METABOLISM	52	0.0893025	0.749285	0.802734	0.861731	1	9130	tags=63%, list=55%, signal=139%		KEGG_RIG_I_LIKE_RECEPTOR_SIGNALING_PATHWAY	56	-0.0819031	-0.720577	0.822134	0.909357	1	12980	tags=86%, list=78%, signal=381%		KEGG_GLYCOSPHINGOLIPID_BIOSYNTHESIS_GANGLIO_SERIES	15	-0.19642	-0.905155	0.588119	0.66746	1	7874	tags=67%, list=47%, signal=126%		KEGG_THYROID_CANCER	28	0.131443	0.801402	0.714286	0.849598	1	7964	tags=61%, list=48%, signal=116%		KEGG_ENDOCYTOSIS	178	0.0511169	0.784555	0.733075	0.831239	1	13350	tags=85%, list=80%, signal=415%
KEGG_ALANINE_ASPARTATE_AND_GLUTAMATE_METABOLISM	27	0.116305	0.709318	0.807203	0.866804	1	9213	tags=67%, list=55%, signal=148%		KEGG_HEDGEHOG_SIGNALING_PATHWAY	49	0.0757353	0.643244	0.922027	0.925372	1	14105	tags=92%, list=84%, signal=582%		KEGG_CYTOKINE_CYTOKINE_RECEPTOR_INTERACTION	218	-0.0520939	-0.892335	0.60334	0.668881	1	4668	tags=33%, list=28%, signal=45%		KEGG_VEGF_SIGNALING_PATHWAY	68	0.0822464	0.797908	0.756972	0.84396	1	2566	tags=24%, list=15%, signal=28%		KEGG_FC_EPSILON_RI_SIGNALING_PATHWAY	69	0.0780176	0.775921	0.738523	0.836406	1	5005	tags=38%, list=30%, signal=54%
KEGG_INSULIN_SIGNALING_PATHWAY	124	-0.0573313	-0.725982	0.796715	0.875486	1	14165	tags=90%, list=85%, signal=584%		KEGG_STEROID_BIOSYNTHESIS	16	-0.141627	-0.685616	0.846307	0.947618	1	4955	tags=44%, list=30%, signal=62%		KEGG_AXON_GUIDANCE	124	-0.0659317	-0.851989	0.628906	0.693955	1	6194	tags=44%, list=37%, signal=69%		KEGG_ERBB_SIGNALING_PATHWAY	84	0.0726153	0.790121	0.74	0.8451	1	8154	tags=56%, list=49%, signal=109%		KEGG_GAP_JUNCTION	85	0.0718113	0.768624	0.762948	0.839119	1	1166	tags=14%, list=7%, signal=15%
KEGG_RENAL_CELL_CARCINOMA	70	0.0731241	0.728391	0.812992	0.875746	1	9061	tags=61%, list=54%, signal=133%		KEGG_GLYCOSAMINOGLYCAN_BIOSYNTHESIS_HEPARAN_SULFATE	21	-0.11148	-0.613164	0.932271	0.948421	1	8498	tags=62%, list=51%, signal=126%		KEGG_ARGININE_AND_PROLINE_METABOLISM	50	-0.0993432	-0.827195	0.679283	0.711619	1	10728	tags=74%, list=64%, signal=206%		KEGG_CYSTEINE_AND_METHIONINE_METABOLISM	32	0.105065	0.727761	0.829868	0.930672	1	11842	tags=81%, list=71%, signal=277%		KEGG_ALLOGRAFT_REJECTION	31	0.111701	0.745789	0.765784	0.863898	1	2452	tags=26%, list=15%, signal=30%
KEGG_FATTY_ACID_METABOLISM	39	0.0971862	0.713879	0.848837	0.877856	1	10821	tags=74%, list=65%, signal=210%		KEGG_BASAL_TRANSCRIPTION_FACTORS	33	-0.0923478	-0.621865	0.946939	0.948704	1	10123	tags=70%, list=60%, signal=176%		KEGG_ALDOSTERONE_REGULATED_SODIUM_REABSORPTION	38	0.113011	0.821576	0.686441	0.721918	1	3397	tags=32%, list=20%, signal=40%		KEGG_ANTIGEN_PROCESSING_AND_PRESENTATION	67	0.075088	0.727739	0.802935	0.918666	1	8739	tags=60%, list=52%, signal=124%		KEGG_PHOSPHATIDYLINOSITOL_SIGNALING_SYSTEM	72	0.0732384	0.731166	0.797189	0.867328	1	11563	tags=76%, list=69%, signal=246%
KEGG_BETA_ALANINE_METABOLISM	21	-0.132237	-0.707103	0.817822	0.892865	1	8948	tags=67%, list=53%, signal=143%		KEGG_ABC_TRANSPORTERS	40	-0.0867872	-0.652842	0.892996	0.952304	1	2736	tags=25%, list=16%, signal=30%		KEGG_MELANOMA	61	0.0879141	0.817352	0.734774	0.722177	1	1551	tags=18%, list=9%, signal=20%		KEGG_ALANINE_ASPARTATE_AND_GLUTAMATE_METABOLISM	27	0.119007	0.72388	0.82495	0.912201	1	8548	tags=63%, list=51%, signal=128%		KEGG_PANTOTHENATE_AND_COA_BIOSYNTHESIS	16	0.151435	0.732052	0.805447	0.874277	1	14203	tags=100%, list=85%, signal=660%
KEGG_WNT_SIGNALING_PATHWAY	139	0.0491339	0.661265	0.869565	0.905651	1	2314	tags=19%, list=14%, signal=22%		KEGG_ARGININE_AND_PROLINE_METABOLISM	50	-0.0752775	-0.624323	0.92607	0.95477	1	3431	tags=28%, list=21%, signal=35%		KEGG_INTESTINAL_IMMUNE_NETWORK_FOR_IGA_PRODUCTION	41	0.107108	0.824858	0.689243	0.723115	1	660	tags=15%, list=4%, signal=15%		KEGG_PENTOSE_AND_GLUCURONATE_INTERCONVERSIONS	17	0.144686	0.709079	0.821218	0.920317	1	14316	tags=100%, list=86%, signal=691%		KEGG_REGULATION_OF_AUTOPHAGY	22	0.125029	0.70873	0.837398	0.88129	1	7038	tags=55%, list=42%, signal=94%
KEGG_GLIOMA	61	-0.0735744	-0.669231	0.87	0.920921	1	3987	tags=31%, list=24%, signal=41%		KEGG_GLYCOSPHINGOLIPID_BIOSYNTHESIS_LACTO_AND_NEOLACTO_SERIES	22	-0.109707	-0.631027	0.9182	0.957171	1	10339	tags=73%, list=62%, signal=190%		KEGG_TRYPTOPHAN_METABOLISM	37	0.11432	0.812655	0.701149	0.72359	1	13469	tags=92%, list=80%, signal=470%		KEGG_LONG_TERM_DEPRESSION	61	0.0767862	0.704575	0.844794	0.914481	1	2834	tags=25%, list=17%, signal=29%		KEGG_BLADDER_CANCER	42	0.0918779	0.710115	0.833006	0.887617	1	10021	tags=69%, list=60%, signal=172%
KEGG_NON_SMALL_CELL_LUNG_CANCER	53	-0.0776341	-0.661905	0.87551	0.921127	1	11021	tags=74%, list=66%, signal=215%		KEGG_SMALL_CELL_LUNG_CANCER	83	-0.060767	-0.655791	0.887776	0.95778	1	11289	tags=73%, list=67%, signal=225%		KEGG_LONG_TERM_DEPRESSION	61	0.0871541	0.805914	0.73029	0.727704	1	4856	tags=38%, list=29%, signal=53%		KEGG_NATURAL_KILLER_CELL_MEDIATED_CYTOTOXICITY	114	0.0575363	0.702098	0.853414	0.906418	1	2566	tags=21%, list=15%, signal=25%		KEGG_NICOTINATE_AND_NICOTINAMIDE_METABOLISM	23	0.112251	0.653706	0.922201	0.920479	1	12676	tags=87%, list=76%, signal=358%
KEGG_COLORECTAL_CANCER	62	0.0670911	0.625029	0.940239	0.923138	1	8598	tags=58%, list=51%, signal=119%		KEGG_TRYPTOPHAN_METABOLISM	37	-0.0910736	-0.662669	0.907407	0.959302	1	6622	tags=49%, list=40%, signal=80%		KEGG_NITROGEN_METABOLISM	20	0.136947	0.727083	0.790927	0.831475	1	13609	tags=95%, list=81%, signal=508%		KEGG_INSULIN_SIGNALING_PATHWAY	124	0.0531136	0.685291	0.854508	0.915486	1	1951	tags=17%, list=12%, signal=19%		KEGG_VEGF_SIGNALING_PATHWAY	68	0.0667888	0.655574	0.909091	0.926636	1	3562	tags=28%, list=21%, signal=35%
KEGG_GLYCOSAMINOGLYCAN_BIOSYNTHESIS_HEPARAN_SULFATE	21	-0.122132	-0.669848	0.871032	0.929004	1	7523	tags=57%, list=45%, signal=104%		KEGG_N_GLYCAN_BIOSYNTHESIS	46	-0.07917	-0.635248	0.910359	0.961459	1	14688	tags=96%, list=88%, signal=780%		KEGG_MAPK_SIGNALING_PATHWAY	239	0.0387442	0.699899	0.856299	0.859725	1	8183	tags=53%, list=49%, signal=102%		KEGG_VIBRIO_CHOLERAE_INFECTION	53	0.0775278	0.676911	0.879592	0.914595	1	10705	tags=72%, list=64%, signal=198%		KEGG_MELANOMA	61	0.0705316	0.659691	0.886719	0.930686	1	13364	tags=87%, list=80%, signal=430%
KEGG_STEROID_HORMONE_BIOSYNTHESIS	35	-0.091897	-0.640839	0.904762	0.934066	1	8986	tags=63%, list=54%, signal=135%		KEGG_GLYCOSPHINGOLIPID_BIOSYNTHESIS_GANGLIO_SERIES	15	-0.142755	-0.663922	0.885892	0.966542	1	14350	tags=100%, list=86%, signal=701%		KEGG_VASOPRESSIN_REGULATED_WATER_REABSORPTION	42	0.090272	0.690386	0.851852	0.864038	1	6860	tags=50%, list=41%, signal=85%		KEGG_STARCH_AND_SUCROSE_METABOLISM	34	0.0956349	0.665256	0.898496	0.917082	1	13661	tags=91%, list=82%, signal=495%		KEGG_STARCH_AND_SUCROSE_METABOLISM	34	0.0912677	0.628011	0.910891	0.936862	1	3397	tags=29%, list=20%, signal=37%
KEGG_AMINO_SUGAR_AND_NUCLEOTIDE_SUGAR_METABOLISM	41	-0.0815419	-0.614028	0.937143	0.949362	1	3538	tags=29%, list=21%, signal=37%		KEGG_GLYCOLYSIS_GLUCONEOGENESIS	55	-0.0617698	-0.553758	0.966245	0.978227	1	12968	tags=84%, list=77%, signal=370%		KEGG_PENTOSE_AND_GLUCURONATE_INTERCONVERSIONS	17	0.139763	0.672819	0.87526	0.877171	1	7507	tags=59%, list=45%, signal=107%		KEGG_INOSITOL_PHOSPHATE_METABOLISM	52	0.0746777	0.641778	0.918699	0.929965	1	5190	tags=38%, list=31%, signal=56%		KEGG_TRYPTOPHAN_METABOLISM	37	-0.0838422	-0.608088	0.944223	0.937799	1	11266	tags=76%, list=67%, signal=231%
KEGG_NEUROTROPHIN_SIGNALING_PATHWAY	120	-0.0443829	-0.575218	0.974308	0.967616	1	14047	tags=88%, list=84%, signal=546%		KEGG_BASAL_CELL_CARCINOMA	49	-0.0637096	-0.53122	0.981405	0.979579	1	6452	tags=45%, list=39%, signal=73%		KEGG_ARRHYTHMOGENIC_RIGHT_VENTRICULAR_CARDIOMYOPATHY_ARVC	69	-0.0687986	-0.683657	0.862348	0.888414	1	4433	tags=33%, list=26%, signal=45%		KEGG_RETINOL_METABOLISM	39	0.0806563	0.580503	0.96087	0.967639	1	11097	tags=74%, list=66%, signal=220%		KEGG_PENTOSE_AND_GLUCURONATE_INTERCONVERSIONS	17	0.125226	0.61448	0.9182	0.940075	1	9719	tags=71%, list=58%, signal=168%
KEGG_PHENYLALANINE_METABOLISM	17	-0.10965	-0.545069	0.981013	0.973906	1	7028	tags=53%, list=42%, signal=91%		KEGG_CYTOSOLIC_DNA_SENSING_PATHWAY	42	0.0653985	0.504915	0.986056	0.987696	1	11260	tags=74%, list=67%, signal=225%		KEGG_HISTIDINE_METABOLISM	27	-0.0975278	-0.620274	0.946535	0.927682	1	12628	tags=85%, list=75%, signal=346%		KEGG_T_CELL_RECEPTOR_SIGNALING_PATHWAY	103	0.04432	0.516053	0.99596	0.985416	1	14048	tags=88%, list=84%, signal=547%		KEGG_PPAR_SIGNALING_PATHWAY	56	0.0617849	0.552065	0.965451	0.970512	1	12417	tags=80%, list=74%, signal=310%

## Sheet: Hallmarks
MGUS --> SMM										SMM --> NDMM										NDMM --> ERMM										ERMM --> LRMM										NDMM --> LRMM
NAME	SIZE	ES	NES	NOM p-val	FDR q-val	FWER p-val	RANK AT MAX	LEADING EDGE		NAME	SIZE	ES	NES	NOM p-val	FDR q-val	FWER p-val	RANK AT MAX	LEADING EDGE		NAME	SIZE	ES	NES	NOM p-val	FDR q-val	FWER p-val	RANK AT MAX	LEADING EDGE		NAME	SIZE	ES	NES	NOM p-val	FDR q-val	FWER p-val	RANK AT MAX	LEADING EDGE		NAME	SIZE	ES	NES	NOM p-val	FDR q-val	FWER p-val	RANK AT MAX	LEADING EDGE
HALLMARK_EPITHELIAL_MESENCHYMAL_TRANSITION	198	-0.351982	-5.79175	0	0	0	4492	tags=62%, list=27%, signal=83%		HALLMARK_ALLOGRAFT_REJECTION	186	-0.308006	-4.90282	0	0	0	5341	tags=62%, list=32%, signal=91%		HALLMARK_MYOGENESIS	181	-0.217104	-3.31234	0	0	0	7595	tags=67%, list=45%, signal=121%		HALLMARK_TNFA_SIGNALING_VIA_NFKB	196	-0.2138	-3.51698	0	0	0	7309	tags=65%, list=44%, signal=114%		HALLMARK_UV_RESPONSE_DN	144	-0.189469	-2.68186	0	0	0	11850	tags=90%, list=71%, signal=304%
HALLMARK_INFLAMMATORY_RESPONSE	185	-0.340512	-5.48379	0	0	0	3864	tags=57%, list=23%, signal=73%		HALLMARK_INFLAMMATORY_RESPONSE	185	-0.278578	-4.41981	0	0	0	5070	tags=58%, list=30%, signal=82%		HALLMARK_KRAS_SIGNALING_DN	153	-0.229407	-3.25006	0	0	0	7901	tags=70%, list=47%, signal=131%		HALLMARK_KRAS_SIGNALING_DN	153	-0.216406	-3.13351	0	0	0	9648	tags=79%, list=58%, signal=185%		HALLMARK_PROTEIN_SECRETION	96	0.255509	2.90017	0	0	0	7602	tags=71%, list=45%, signal=129%
HALLMARK_COMPLEMENT	195	-0.297804	-4.83103	0	0	0	8378	tags=79%, list=50%, signal=157%		HALLMARK_IL6_JAK_STAT3_SIGNALING	85	-0.384584	-4.11141	0	0	0	3442	tags=59%, list=21%, signal=74%		HALLMARK_E2F_TARGETS	198	0.53256	8.60336	0	0	0	2856	tags=70%, list=17%, signal=83%		HALLMARK_EPITHELIAL_MESENCHYMAL_TRANSITION	198	-0.169188	-2.74785	0	0	0	7346	tags=61%, list=44%, signal=107%		HALLMARK_PEROXISOME	100	0.293912	3.50758	0	0	0	4649	tags=57%, list=28%, signal=78%
HALLMARK_TNFA_SIGNALING_VIA_NFKB	196	-0.283977	-4.72119	0	0	0	5209	tags=59%, list=31%, signal=85%		HALLMARK_KRAS_SIGNALING_UP	183	-0.248848	-3.94394	0	0	0	4387	tags=51%, list=26%, signal=68%		HALLMARK_MYC_TARGETS_V1	195	0.458761	7.29501	0	0	0	7001	tags=87%, list=42%, signal=148%		HALLMARK_MYOGENESIS	181	-0.178881	-2.74508	0	0	0	7673	tags=64%, list=46%, signal=116%		HALLMARK_OXIDATIVE_PHOSPHORYLATION	200	0.549763	9.05171	0	0	0	4799	tags=83%, list=29%, signal=115%
HALLMARK_KRAS_SIGNALING_UP	183	-0.29504	-4.66376	0	0	0	5360	tags=61%, list=32%, signal=89%		HALLMARK_IL2_STAT5_SIGNALING	197	-0.225839	-3.73065	0	0	0	5271	tags=54%, list=31%, signal=78%		HALLMARK_G2M_CHECKPOINT	195	0.424625	6.86225	0	0	0	5420	tags=74%, list=32%, signal=109%		HALLMARK_OXIDATIVE_PHOSPHORYLATION	200	0.508611	8.16286	0	0	0	4559	tags=78%, list=27%, signal=105%		HALLMARK_MYOGENESIS	181	-0.222126	-3.49258	0	0	0	9731	tags=80%, list=58%, signal=189%
HALLMARK_ALLOGRAFT_REJECTION	186	-0.281609	-4.3922	0	0	0	5238	tags=59%, list=31%, signal=85%		HALLMARK_HEME_METABOLISM	192	-0.216796	-3.43016	0	0	0	5654	tags=55%, list=34%, signal=82%		HALLMARK_OXIDATIVE_PHOSPHORYLATION	200	0.405474	6.61492	0	0	0	7436	tags=85%, list=44%, signal=150%		HALLMARK_MYC_TARGETS_V1	195	0.504072	8.07698	0	0	0	4535	tags=77%, list=27%, signal=104%		HALLMARK_MYC_TARGETS_V2	57	0.430732	3.8043	0	0	0	4853	tags=72%, list=29%, signal=101%
HALLMARK_APICAL_JUNCTION	187	-0.244227	-3.88389	0	0	0	5625	tags=58%, list=34%, signal=86%		HALLMARK_COMPLEMENT	195	-0.198724	-3.14745	0	0	0	5039	tags=50%, list=30%, signal=70%		HALLMARK_MTORC1_SIGNALING	197	0.286396	4.66024	0	0	0	6986	tags=70%, list=42%, signal=119%		HALLMARK_E2F_TARGETS	198	0.406794	6.61829	0	0	0	6880	tags=81%, list=41%, signal=136%		HALLMARK_MYC_TARGETS_V1	195	0.568078	9.4186	0	0	0	4592	tags=84%, list=27%, signal=114%
HALLMARK_IL6_JAK_STAT3_SIGNALING	85	-0.349855	-3.76413	0	0	0	6383	tags=73%, list=38%, signal=117%		HALLMARK_MYC_TARGETS_V1	195	0.25456	4.09037	0	0	0	8748	tags=77%, list=52%, signal=160%		HALLMARK_HEME_METABOLISM	192	0.264749	4.26806	0	0	0	6602	tags=66%, list=39%, signal=107%		HALLMARK_G2M_CHECKPOINT	195	0.292009	4.74848	0	0	0	6927	tags=70%, list=41%, signal=118%		HALLMARK_MTORC1_SIGNALING	197	0.317548	5.20702	0	0	0	4177	tags=56%, list=25%, signal=74%
HALLMARK_MYOGENESIS	181	-0.229269	-3.6083	0	0	0	7671	tags=69%, list=46%, signal=125%		HALLMARK_G2M_CHECKPOINT	195	0.213642	3.48811	0	0	0	9339	tags=77%, list=56%, signal=172%		HALLMARK_INTERFERON_GAMMA_RESPONSE	196	0.234203	3.86022	0	0	0	9275	tags=79%, list=55%, signal=174%		HALLMARK_MTORC1_SIGNALING	197	0.247743	4.10036	0	0	0	6266	tags=62%, list=37%, signal=98%		HALLMARK_MITOTIC_SPINDLE	199	0.184065	3.0559	0	0	0	10243	tags=79%, list=61%, signal=202%
HALLMARK_COAGULATION	127	-0.273469	-3.596	0	0	0	7978	tags=75%, list=48%, signal=142%		HALLMARK_E2F_TARGETS	198	0.212306	3.44514	0	0	0	8575	tags=72%, list=51%, signal=146%		HALLMARK_ALLOGRAFT_REJECTION	186	0.233782	3.78611	0	0	0	8277	tags=73%, list=49%, signal=142%		HALLMARK_DNA_REPAIR	149	0.268655	3.76961	0	0	0	7112	tags=69%, list=42%, signal=119%		HALLMARK_KRAS_SIGNALING_DN	153	-0.272126	-3.91098	0	0	0	8724	tags=79%, list=52%, signal=164%
HALLMARK_IL2_STAT5_SIGNALING	197	-0.219782	-3.53712	0	0	0	3842	tags=45%, list=23%, signal=57%		HALLMARK_MYC_TARGETS_V2	57	0.376089	3.37693	0	0	0	6058	tags=74%, list=36%, signal=115%		HALLMARK_FATTY_ACID_METABOLISM	145	0.264792	3.66809	0	0	0	7725	tags=72%, list=46%, signal=133%		HALLMARK_MYC_TARGETS_V2	57	0.341619	3.04994	0	0	0	8101	tags=82%, list=48%, signal=159%		HALLMARK_INTERFERON_GAMMA_RESPONSE	196	0.244781	4.0404	0	0	0	7990	tags=72%, list=48%, signal=136%
HALLMARK_ESTROGEN_RESPONSE_EARLY	190	-0.193301	-3.09109	0	0	0	7637	tags=65%, list=46%, signal=118%		HALLMARK_OXIDATIVE_PHOSPHORYLATION	200	0.157796	2.57768	0	0.000107692	0.001	11950	tags=87%, list=71%, signal=301%		HALLMARK_DNA_REPAIR	149	0.234583	3.44671	0	0	0	5880	tags=58%, list=35%, signal=89%		HALLMARK_INTERFERON_ALPHA_RESPONSE	96	0.248478	2.92236	0	0	0	7719	tags=71%, list=46%, signal=131%		HALLMARK_INTERFERON_ALPHA_RESPONSE	96	0.332913	3.81767	0	0	0	7360	tags=77%, list=44%, signal=137%
HALLMARK_ANGIOGENESIS	34	-0.448055	-3.08449	0	0	0	3839	tags=68%, list=23%, signal=88%		HALLMARK_COAGULATION	127	-0.193985	-2.57754	0	0.0006175	0.003	5213	tags=50%, list=31%, signal=73%		HALLMARK_ADIPOGENESIS	194	0.210005	3.39067	0	0	0	6791	tags=61%, list=41%, signal=102%		HALLMARK_FATTY_ACID_METABOLISM	145	0.193978	2.73623	0	0	0	5091	tags=50%, list=30%, signal=71%		HALLMARK_G2M_CHECKPOINT	195	0.446714	7.22912	0	0	0	6342	tags=82%, list=38%, signal=131%
HALLMARK_HYPOXIA	189	-0.174447	-2.77601	0	0	0	7829	tags=64%, list=47%, signal=119%		HALLMARK_PROTEIN_SECRETION	96	-0.207953	-2.38078	0	0.0018947	0.01	10313	tags=82%, list=62%, signal=213%		HALLMARK_MITOTIC_SPINDLE	199	0.198335	3.24728	0	0	0	9166	tags=74%, list=55%, signal=162%		HALLMARK_ADIPOGENESIS	194	0.162982	2.65038	0	0.0001	0.001	8259	tags=65%, list=49%, signal=128%		HALLMARK_FATTY_ACID_METABOLISM	145	0.304316	4.35586	0	0	0	6723	tags=70%, list=40%, signal=117%
HALLMARK_MYC_TARGETS_V1	195	0.340262	5.50022	0	0	0	8017	tags=82%, list=48%, signal=155%		HALLMARK_XENOBIOTIC_METABOLISM	182	-0.143045	-2.21391	0	0.00428114	0.028	3978	tags=38%, list=24%, signal=49%		HALLMARK_INTERFERON_ALPHA_RESPONSE	96	0.274499	3.18753	0	0	0	8855	tags=80%, list=53%, signal=169%		HALLMARK_PROTEIN_SECRETION	96	0.215525	2.45964	0	0.000404407	0.005	7570	tags=67%, list=45%, signal=121%		HALLMARK_EPITHELIAL_MESENCHYMAL_TRANSITION	198	-0.21192	-3.52724	0	0	0	9006	tags=75%, list=54%, signal=160%
HALLMARK_OXIDATIVE_PHOSPHORYLATION	200	0.292772	4.76426	0	0	0	9467	tags=86%, list=57%, signal=195%		HALLMARK_APOPTOSIS	158	-0.149224	-2.19727	0.00193798	0.00450397	0.033	4730	tags=43%, list=28%, signal=59%		HALLMARK_COMPLEMENT	195	0.19196	3.13151	0	0	0	7552	tags=64%, list=45%, signal=115%		HALLMARK_UNFOLDED_PROTEIN_RESPONSE	108	0.184521	2.28994	0	0.00204694	0.024	8553	tags=69%, list=51%, signal=141%		HALLMARK_E2F_TARGETS	198	0.600333	9.94623	0	0	0	2834	tags=76%, list=17%, signal=91%
HALLMARK_UNFOLDED_PROTEIN_RESPONSE	108	0.314478	3.85741	0	0	0	6702	tags=71%, list=40%, signal=118%		HALLMARK_TNFA_SIGNALING_VIA_NFKB	196	-0.132626	-2.13321	0.00598802	0.00631361	0.05	4553	tags=40%, list=27%, signal=55%		HALLMARK_PI3K_AKT_MTOR_SIGNALING	101	0.254429	2.95049	0	0	0	8360	tags=75%, list=50%, signal=149%		HALLMARK_ESTROGEN_RESPONSE_EARLY	190	-0.149273	-2.3724	0	0.00243861	0.012	8894	tags=68%, list=53%, signal=143%		HALLMARK_DNA_REPAIR	149	0.344776	4.83253	0	0	0	6411	tags=72%, list=38%, signal=116%
HALLMARK_MYC_TARGETS_V2	57	0.31844	2.81586	0	0	0	4377	tags=58%, list=26%, signal=78%		HALLMARK_APICAL_JUNCTION	187	-0.128906	-2.06041	0.00189036	0.00910086	0.085	5475	tags=45%, list=33%, signal=67%		HALLMARK_MYC_TARGETS_V2	57	0.302154	2.68687	0	7.90598e-05	0.001	8172	tags=79%, list=49%, signal=154%		HALLMARK_INFLAMMATORY_RESPONSE	185	-0.145288	-2.32321	0	0.00287712	0.017	7457	tags=59%, list=45%, signal=105%		HALLMARK_ADIPOGENESIS	194	0.229167	3.67747	0	0	0	5180	tags=54%, list=31%, signal=77%
HALLMARK_INTERFERON_GAMMA_RESPONSE	196	-0.160587	-2.64716	0	8.41346e-05	0.001	6396	tags=54%, list=38%, signal=87%		HALLMARK_UV_RESPONSE_DN	144	-0.145505	-2.06217	0.00196464	0.00967506	0.084	6071	tags=51%, list=36%, signal=79%		HALLMARK_PROTEIN_SECRETION	96	0.248337	2.80076	0	8.37104e-05	0.001	10685	tags=89%, list=64%, signal=243%		HALLMARK_HYPOXIA	189	-0.13936	-2.26541	0.00858369	0.00391164	0.027	10889	tags=79%, list=65%, signal=223%		HALLMARK_ALLOGRAFT_REJECTION	186	0.166265	2.63137	0	7.87037e-05	0.001	11104	tags=83%, list=66%, signal=243%
HALLMARK_APOPTOSIS	158	-0.181011	-2.65159	0	8.97436e-05	0.001	8440	tags=68%, list=50%, signal=137%		HALLMARK_ESTROGEN_RESPONSE_EARLY	190	-0.122899	-2.01916	0.0123203	0.011125	0.108	5807	tags=47%, list=35%, signal=71%		HALLMARK_PEROXISOME	100	0.2449	2.88986	0	8.89423e-05	0.001	5297	tags=56%, list=32%, signal=81%		HALLMARK_PI3K_AKT_MTOR_SIGNALING	101	0.183052	2.11107	0	0.00484824	0.069	6399	tags=56%, list=38%, signal=91%		HALLMARK_HEME_METABOLISM	192	0.169054	2.68346	0	8.39506e-05	0.001	10713	tags=81%, list=64%, signal=222%
HALLMARK_HEME_METABOLISM	192	-0.16581	-2.62384	0	0.000155438	0.002	5190	tags=47%, list=31%, signal=68%		HALLMARK_TGF_BETA_SIGNALING	54	-0.214669	-1.90236	0.0118577	0.019572	0.193	8507	tags=72%, list=51%, signal=146%		HALLMARK_EPITHELIAL_MESENCHYMAL_TRANSITION	198	-0.162529	-2.66273	0	0.000166667	0.001	8724	tags=68%, list=52%, signal=141%		HALLMARK_UV_RESPONSE_UP	148	0.152698	2.13052	0.00201207	0.00494202	0.065	8548	tags=66%, list=51%, signal=134%		HALLMARK_ESTROGEN_RESPONSE_EARLY	190	-0.164262	-2.62456	0	0.000128	0.001	10760	tags=81%, list=64%, signal=223%
HALLMARK_MITOTIC_SPINDLE	199	-0.156483	-2.54124	0	0.000285869	0.004	6412	tags=54%, list=38%, signal=86%		HALLMARK_ANDROGEN_RESPONSE	98	-0.158781	-1.81754	0.0141988	0.0306073	0.296	4361	tags=42%, list=26%, signal=56%		HALLMARK_REACTIVE_OXYGEN_SPECIES_PATHWAY	49	0.312538	2.52698	0	0.000386554	0.005	3664	tags=53%, list=22%, signal=68%		HALLMARK_UV_RESPONSE_DN	144	-0.157439	-2.15525	0.00403226	0.00802316	0.063	9011	tags=69%, list=54%, signal=149%		HALLMARK_COMPLEMENT	195	0.148368	2.38287	0	0.000815762	0.01	8788	tags=67%, list=53%, signal=140%
HALLMARK_ESTROGEN_RESPONSE_LATE	189	-0.15319	-2.43796	0	0.00057265	0.008	7738	tags=61%, list=46%, signal=113%		HALLMARK_PI3K_AKT_MTOR_SIGNALING	101	-0.153416	-1.76791	0.0251572	0.0370534	0.365	13025	tags=93%, list=78%, signal=417%		HALLMARK_IL6_JAK_STAT3_SIGNALING	85	0.207152	2.28853	0	0.00191334	0.026	7182	tags=64%, list=43%, signal=111%		HALLMARK_PEROXISOME	100	0.170464	2.00148	0.00396825	0.00830517	0.123	8711	tags=69%, list=52%, signal=143%		HALLMARK_PI3K_AKT_MTOR_SIGNALING	101	0.207085	2.39273	0	0.000863748	0.01	5005	tags=50%, list=30%, signal=72%
HALLMARK_E2F_TARGETS	198	-0.144374	-2.34736	0	0.000749056	0.011	8179	tags=63%, list=49%, signal=122%		HALLMARK_FATTY_ACID_METABOLISM	145	-0.122458	-1.73762	0.02	0.0414462	0.412	10781	tags=77%, list=64%, signal=213%		HALLMARK_XENOBIOTIC_METABOLISM	182	0.14114	2.23165	0	0.00231433	0.032	7226	tags=57%, list=43%, signal=99%		HALLMARK_APICAL_JUNCTION	187	-0.131957	-2.1224	0.00206612	0.00894078	0.077	6051	tags=49%, list=36%, signal=76%		HALLMARK_REACTIVE_OXYGEN_SPECIES_PATHWAY	49	0.274404	2.22752	0	0.00202854	0.027	5325	tags=59%, list=32%, signal=87%
HALLMARK_XENOBIOTIC_METABOLISM	182	-0.147127	-2.25663	0.00425532	0.00175342	0.026	2715	tags=31%, list=16%, signal=36%		HALLMARK_ANGIOGENESIS	34	-0.242549	-1.6908	0.0178218	0.0483278	0.477	2349	tags=38%, list=14%, signal=44%		HALLMARK_KRAS_SIGNALING_UP	183	0.135905	2.1278	0.00200803	0.0040796	0.058	6346	tags=51%, list=38%, signal=82%		HALLMARK_HEDGEHOG_SIGNALING	35	-0.296766	-2.06621	0.00391389	0.0105716	0.1	6999	tags=71%, list=42%, signal=123%		HALLMARK_TNFA_SIGNALING_VIA_NFKB	196	-0.139068	-2.29409	0	0.00225379	0.02	8972	tags=67%, list=54%, signal=143%
HALLMARK_G2M_CHECKPOINT	195	-0.137581	-2.20247	0	0.00216126	0.034	8196	tags=63%, list=49%, signal=121%		HALLMARK_DNA_REPAIR	149	0.118424	1.6267	0.0394191	0.0776101	0.64	11738	tags=82%, list=70%, signal=272%		HALLMARK_APOPTOSIS	158	0.1401	2.06007	0.00209205	0.00587772	0.088	9434	tags=70%, list=56%, signal=159%		HALLMARK_IL6_JAK_STAT3_SIGNALING	85	-0.181188	-1.97763	0	0.0155976	0.156	8207	tags=67%, list=49%, signal=131%		HALLMARK_GLYCOLYSIS	192	0.13181	2.16454	0.00607287	0.00311512	0.044	3397	tags=33%, list=20%, signal=41%
HALLMARK_APICAL_SURFACE	42	-0.266138	-2.0464	0.00199601	0.00582487	0.092	5520	tags=60%, list=33%, signal=89%		HALLMARK_PEROXISOME	100	-0.135537	-1.57947	0.0532544	0.078841	0.705	11135	tags=80%, list=67%, signal=238%		HALLMARK_INFLAMMATORY_RESPONSE	185	0.125414	1.99287	0.00610998	0.00827414	0.125	5070	tags=43%, list=30%, signal=61%		HALLMARK_INTERFERON_GAMMA_RESPONSE	196	0.115824	1.86102	0.0149254	0.0178343	0.253	9696	tags=69%, list=58%, signal=163%		HALLMARK_APICAL_JUNCTION	187	-0.136606	-2.17455	0	0.00319172	0.034	8301	tags=63%, list=50%, signal=124%
HALLMARK_PROTEIN_SECRETION	96	0.184956	2.09938	0	0.00873406	0.07	11914	tags=90%, list=71%, signal=309%		HALLMARK_ADIPOGENESIS	194	-0.0998153	-1.58792	0.0513834	0.0796565	0.691	7408	tags=54%, list=44%, signal=96%		HALLMARK_IL2_STAT5_SIGNALING	197	0.122074	1.9827	0.00189753	0.00829149	0.13	1718	tags=22%, list=10%, signal=25%		HALLMARK_KRAS_SIGNALING_UP	183	-0.118806	-1.83099	0.00963391	0.0311385	0.308	9649	tags=69%, list=58%, signal=162%		HALLMARK_UV_RESPONSE_UP	148	0.138594	2.01338	0.00198807	0.00770202	0.109	10252	tags=75%, list=61%, signal=192%
HALLMARK_HEDGEHOG_SIGNALING	35	-0.278413	-1.92934	0.004	0.0109023	0.169	5871	tags=63%, list=35%, signal=97%		HALLMARK_UNFOLDED_PROTEIN_RESPONSE	108	0.133427	1.64286	0.0434783	0.083127	0.606	11882	tags=84%, list=71%, signal=289%		HALLMARK_GLYCOLYSIS	192	0.117535	1.87935	0.00576923	0.0140443	0.217	4069	tags=36%, list=24%, signal=47%		HALLMARK_IL2_STAT5_SIGNALING	197	-0.102735	-1.69359	0.0308008	0.0574442	0.522	12914	tags=87%, list=77%, signal=378%		HALLMARK_UNFOLDED_PROTEIN_RESPONSE	108	0.165482	1.97431	0.00199601	0.00876863	0.128	7165	tags=59%, list=43%, signal=103%
HALLMARK_P53_PATHWAY	191	-0.117565	-1.88045	0.00622407	0.014075	0.22	3839	tags=35%, list=23%, signal=44%		HALLMARK_EPITHELIAL_MESENCHYMAL_TRANSITION	198	0.0927378	1.511	0.0686869	0.116554	0.819	5819	tags=44%, list=35%, signal=67%		HALLMARK_ANDROGEN_RESPONSE	98	0.151946	1.76306	0.0203666	0.0261477	0.369	8059	tags=63%, list=48%, signal=121%		HALLMARK_COAGULATION	127	-0.12216	-1.59981	0.0612648	0.0856658	0.695	11150	tags=79%, list=67%, signal=234%		HALLMARK_ANGIOGENESIS	34	-0.275483	-1.88615	0.00994036	0.017393	0.2	8198	tags=76%, list=49%, signal=150%
HALLMARK_DNA_REPAIR	149	0.138189	1.96583	0.0102041	0.016418	0.15	13095	tags=92%, list=78%, signal=419%		HALLMARK_INTERFERON_GAMMA_RESPONSE	196	-0.0865928	-1.40729	0.0977444	0.162487	0.946	5229	tags=40%, list=31%, signal=57%		HALLMARK_UV_RESPONSE_UP	148	0.111139	1.56701	0.0582329	0.0672507	0.714	7315	tags=55%, list=44%, signal=96%		HALLMARK_REACTIVE_OXYGEN_SPECIES_PATHWAY	49	0.18359	1.50187	0.0634921	0.100244	0.84	4108	tags=43%, list=25%, signal=57%		HALLMARK_HEDGEHOG_SIGNALING	35	-0.265522	-1.85228	0.0138614	0.0185338	0.235	10868	tags=91%, list=65%, signal=260%
HALLMARK_KRAS_SIGNALING_DN	153	-0.120503	-1.70051	0.0291262	0.0365074	0.493	4894	tags=41%, list=29%, signal=58%		HALLMARK_ESTROGEN_RESPONSE_LATE	189	-0.0874696	-1.39758	0.112	0.163033	0.952	1830	tags=20%, list=11%, signal=22%		HALLMARK_BILE_ACID_METABOLISM	99	0.127729	1.49563	0.0772358	0.0897458	0.83	4636	tags=40%, list=28%, signal=56%		HALLMARK_APICAL_SURFACE	42	-0.197519	-1.48151	0.0890688	0.108862	0.867	7064	tags=62%, list=42%, signal=107%		HALLMARK_HYPOXIA	189	-0.0965238	-1.56983	0.0552268	0.0788435	0.713	8410	tags=60%, list=50%, signal=119%
HALLMARK_ANDROGEN_RESPONSE	98	0.148945	1.7717	0.020284	0.0393949	0.365	3498	tags=36%, list=21%, signal=45%		HALLMARK_NOTCH_SIGNALING	31	-0.205644	-1.3703	0.108818	0.174865	0.961	7903	tags=68%, list=47%, signal=128%		HALLMARK_WNT_BETA_CATENIN_SIGNALING	41	-0.215984	-1.68027	0.0378947	0.0915729	0.505	8641	tags=73%, list=52%, signal=151%		HALLMARK_ANGIOGENESIS	34	-0.216726	-1.48492	0.0782443	0.113232	0.86	4257	tags=47%, list=25%, signal=63%		HALLMARK_KRAS_SIGNALING_UP	183	0.0953047	1.49281	0.0787993	0.100824	0.817	12048	tags=81%, list=72%, signal=287%
HALLMARK_REACTIVE_OXYGEN_SPECIES_PATHWAY	49	-0.196239	-1.61149	0.0352941	0.0522838	0.641	7656	tags=65%, list=46%, signal=120%		HALLMARK_HEDGEHOG_SIGNALING	35	-0.192077	-1.35798	0.130977	0.177013	0.965	2053	tags=31%, list=12%, signal=36%		HALLMARK_ESTROGEN_RESPONSE_EARLY	190	-0.100447	-1.63305	0.0352251	0.0949448	0.605	5650	tags=44%, list=34%, signal=65%		HALLMARK_ESTROGEN_RESPONSE_LATE	189	-0.0941461	-1.4987	0.0627615	0.114763	0.845	10486	tags=72%, list=63%, signal=191%		HALLMARK_BILE_ACID_METABOLISM	99	0.127819	1.4986	0.0680934	0.102599	0.807	6325	tags=51%, list=38%, signal=81%
HALLMARK_UV_RESPONSE_DN	144	-0.113375	-1.55474	0.0571992	0.067985	0.754	2885	tags=28%, list=17%, signal=34%		HALLMARK_REACTIVE_OXYGEN_SPECIES_PATHWAY	49	-0.163465	-1.32376	0.133056	0.194902	0.978	8886	tags=69%, list=53%, signal=147%		HALLMARK_CHOLESTEROL_HOMEOSTASIS	73	0.137126	1.3822	0.136364	0.141415	0.95	7343	tags=58%, list=44%, signal=102%		HALLMARK_WNT_BETA_CATENIN_SIGNALING	41	-0.197103	-1.51341	0.0678643	0.11551	0.831	10589	tags=83%, list=63%, signal=225%		HALLMARK_INFLAMMATORY_RESPONSE	185	0.0902586	1.42845	0.104167	0.127387	0.892	11713	tags=79%, list=70%, signal=260%
HALLMARK_INTERFERON_ALPHA_RESPONSE	96	-0.115204	-1.33978	0.127745	0.160863	0.965	9067	tags=66%, list=54%, signal=142%		HALLMARK_P53_PATHWAY	191	-0.0736702	-1.18555	0.241055	0.299395	0.999	4390	tags=34%, list=26%, signal=45%		HALLMARK_UNFOLDED_PROTEIN_RESPONSE	108	0.10763	1.31704	0.153209	0.180933	0.987	12156	tags=83%, list=73%, signal=303%		HALLMARK_HEME_METABOLISM	192	-0.0858922	-1.4083	0.109162	0.134179	0.933	12178	tags=81%, list=73%, signal=295%		HALLMARK_XENOBIOTIC_METABOLISM	182	0.0903417	1.41803	0.0846774	0.128548	0.901	7883	tags=56%, list=47%, signal=105%
HALLMARK_MTORC1_SIGNALING	197	0.0863641	1.41154	0.0909091	0.192766	0.933	10889	tags=74%, list=65%, signal=208%		HALLMARK_KRAS_SIGNALING_DN	153	0.0863531	1.25179	0.180266	0.300023	0.995	6224	tags=46%, list=37%, signal=72%		HALLMARK_ESTROGEN_RESPONSE_LATE	189	-0.0871559	-1.39896	0.1	0.199107	0.927	5023	tags=39%, list=30%, signal=55%		HALLMARK_XENOBIOTIC_METABOLISM	182	-0.0905767	-1.41395	0.0981211	0.137832	0.931	3927	tags=32%, list=23%, signal=42%		HALLMARK_WNT_BETA_CATENIN_SIGNALING	41	-0.191414	-1.439	0.0828625	0.131642	0.891	8643	tags=71%, list=52%, signal=146%
HALLMARK_PI3K_AKT_MTOR_SIGNALING	101	-0.10533	-1.23121	0.203095	0.239504	0.992	12665	tags=86%, list=76%, signal=352%		HALLMARK_APICAL_SURFACE	42	-0.158143	-1.194	0.239351	0.300622	0.998	4932	tags=45%, list=29%, signal=64%		HALLMARK_HEDGEHOG_SIGNALING	35	-0.200361	-1.41791	0.101961	0.214721	0.911	2871	tags=37%, list=17%, signal=45%		HALLMARK_GLYCOLYSIS	192	0.0856202	1.37433	0.100402	0.158671	0.956	4074	tags=33%, list=24%, signal=43%		HALLMARK_APOPTOSIS	158	0.0948214	1.39353	0.104	0.137468	0.922	9655	tags=67%, list=58%, signal=157%
HALLMARK_SPERMATOGENESIS	110	-0.099649	-1.20569	0.21229	0.256248	0.996	9603	tags=67%, list=57%, signal=157%		HALLMARK_CHOLESTEROL_HOMEOSTASIS	73	-0.112275	-1.14992	0.257862	0.326336	1	11198	tags=78%, list=67%, signal=235%		HALLMARK_P53_PATHWAY	191	0.0779265	1.24267	0.21499	0.232473	0.996	13518	tags=88%, list=81%, signal=455%		HALLMARK_MITOTIC_SPINDLE	199	0.0819523	1.32456	0.155136	0.180981	0.977	6381	tags=46%, list=38%, signal=74%		HALLMARK_ESTROGEN_RESPONSE_LATE	189	-0.0861017	-1.33303	0.15261	0.187942	0.978	6900	tags=50%, list=41%, signal=84%
HALLMARK_NOTCH_SIGNALING	31	0.196854	1.31215	0.156652	0.258258	0.982	3189	tags=39%, list=19%, signal=48%		HALLMARK_MTORC1_SIGNALING	197	0.070446	1.14514	0.278884	0.3926	1	9793	tags=65%, list=59%, signal=156%		HALLMARK_UV_RESPONSE_DN	144	-0.0863334	-1.21784	0.2	0.315549	0.998	12399	tags=83%, list=74%, signal=316%		HALLMARK_SPERMATOGENESIS	110	0.100886	1.23595	0.206751	0.242778	0.996	9124	tags=65%, list=55%, signal=141%		HALLMARK_ANDROGEN_RESPONSE	98	0.110604	1.28503	0.181633	0.206065	0.984	6356	tags=49%, list=38%, signal=79%
HALLMARK_GLYCOLYSIS	192	-0.0725842	-1.1645	0.265393	0.288779	0.999	7081	tags=49%, list=42%, signal=85%		HALLMARK_HYPOXIA	189	-0.0662186	-1.07838	0.349594	0.398807	1	5458	tags=39%, list=33%, signal=57%		HALLMARK_HYPOXIA	189	-0.0765589	-1.22776	0.209544	0.342129	0.997	5464	tags=40%, list=33%, signal=59%		HALLMARK_ALLOGRAFT_REJECTION	186	-0.0733268	-1.14762	0.293279	0.340366	1	4816	tags=36%, list=29%, signal=50%		HALLMARK_CHOLESTEROL_HOMEOSTASIS	73	0.126032	1.2692	0.176471	0.211158	0.988	5006	tags=42%, list=30%, signal=60%
HALLMARK_PEROXISOME	100	0.104665	1.17861	0.229645	0.369663	0.999	9973	tags=70%, list=60%, signal=172%		HALLMARK_BILE_ACID_METABOLISM	99	-0.0885188	-0.999582	0.438247	0.464693	1	10869	tags=74%, list=65%, signal=209%		HALLMARK_NOTCH_SIGNALING	31	-0.148806	-0.997246	0.461538	0.522548	1	6693	tags=55%, list=40%, signal=91%		HALLMARK_TGF_BETA_SIGNALING	54	0.131313	1.09959	0.320939	0.368307	1	8036	tags=61%, list=48%, signal=117%		HALLMARK_NOTCH_SIGNALING	31	-0.190911	-1.26251	0.201961	0.228201	0.997	8689	tags=71%, list=52%, signal=147%
HALLMARK_PANCREAS_BETA_CELLS	22	-0.180469	-1.00868	0.438976	0.454105	1	1549	tags=27%, list=9%, signal=30%		HALLMARK_MITOTIC_SPINDLE	199	-0.0635842	-1.00181	0.441815	0.475025	1	14424	tags=92%, list=86%, signal=661%		HALLMARK_APICAL_JUNCTION	187	-0.0641517	-1.00904	0.438017	0.555697	1	10753	tags=71%, list=64%, signal=195%		HALLMARK_PANCREAS_BETA_CELLS	22	-0.18209	-1.00858	0.428866	0.481246	1	6847	tags=59%, list=41%, signal=100%		HALLMARK_IL6_JAK_STAT3_SIGNALING	85	0.113422	1.21316	0.218688	0.250941	0.996	11893	tags=82%, list=71%, signal=283%
HALLMARK_FATTY_ACID_METABOLISM	145	0.0744358	1.00636	0.444215	0.580171	1	9729	tags=66%, list=58%, signal=155%		HALLMARK_PANCREAS_BETA_CELLS	22	-0.180339	-1.00698	0.438247	0.483455	1	7637	tags=64%, list=46%, signal=117%		HALLMARK_SPERMATOGENESIS	110	0.0760889	0.931005	0.528376	0.588704	1	10297	tags=69%, list=62%, signal=178%		HALLMARK_BILE_ACID_METABOLISM	99	-0.0867356	-1.01914	0.423077	0.487683	1	5320	tags=40%, list=32%, signal=59%		HALLMARK_IL2_STAT5_SIGNALING	197	0.0711489	1.15817	0.256673	0.293998	0.998	14199	tags=92%, list=85%, signal=599%
HALLMARK_BILE_ACID_METABOLISM	99	-0.0673988	-0.799618	0.705769	0.738116	1	3275	tags=26%, list=20%, signal=32%		HALLMARK_SPERMATOGENESIS	110	0.0779633	0.942003	0.497984	0.598925	1	3115	tags=26%, list=19%, signal=32%		HALLMARK_PANCREAS_BETA_CELLS	22	0.157522	0.864542	0.597959	0.672175	1	3452	tags=36%, list=21%, signal=46%		HALLMARK_P53_PATHWAY	191	0.0598663	0.956149	0.490421	0.537659	1	10750	tags=70%, list=64%, signal=194%		HALLMARK_P53_PATHWAY	191	0.0703827	1.11299	0.29505	0.330339	0.999	5231	tags=38%, list=31%, signal=55%
HALLMARK_CHOLESTEROL_HOMEOSTASIS	73	0.0834011	0.840404	0.696202	0.757818	1	8926	tags=62%, list=53%, signal=132%		HALLMARK_GLYCOLYSIS	192	0.0595684	0.975349	0.464627	0.600239	1	7120	tags=48%, list=43%, signal=83%		HALLMARK_TGF_BETA_SIGNALING	54	0.0958563	0.832468	0.662722	0.701214	1	6458	tags=48%, list=39%, signal=78%		HALLMARK_NOTCH_SIGNALING	31	-0.142594	-0.927878	0.531128	0.573951	1	10036	tags=74%, list=60%, signal=185%		HALLMARK_COAGULATION	127	-0.0814642	-1.08104	0.3375	0.39249	1	9981	tags=68%, list=60%, signal=166%
HALLMARK_ADIPOGENESIS	194	-0.0460801	-0.750234	0.810204	0.784229	1	11230	tags=72%, list=67%, signal=215%		HALLMARK_MYOGENESIS	181	0.0529529	0.818706	0.666667	0.739958	1	2636	tags=21%, list=16%, signal=25%		HALLMARK_COAGULATION	127	-0.0631941	-0.828265	0.681298	0.729871	1	1587	tags=16%, list=9%, signal=17%		HALLMARK_CHOLESTEROL_HOMEOSTASIS	73	0.0910828	0.901356	0.553015	0.592627	1	8798	tags=62%, list=53%, signal=129%		HALLMARK_APICAL_SURFACE	42	-0.132993	-1.03329	0.395538	0.422814	1	11329	tags=81%, list=68%, signal=250%
HALLMARK_TGF_BETA_SIGNALING	54	0.0970085	0.853854	0.639066	0.797158	1	5509	tags=43%, list=33%, signal=63%		HALLMARK_INTERFERON_ALPHA_RESPONSE	96	-0.0652444	-0.740461	0.83499	0.799348	1	13385	tags=86%, list=80%, signal=429%		HALLMARK_ANGIOGENESIS	34	-0.109321	-0.756266	0.752988	0.775406	1	10481	tags=74%, list=63%, signal=196%		HALLMARK_ANDROGEN_RESPONSE	98	-0.0726294	-0.839447	0.642718	0.686469	1	1525	tags=16%, list=9%, signal=18%		HALLMARK_SPERMATOGENESIS	110	0.0788808	0.957472	0.488095	0.505901	1	1274	tags=15%, list=8%, signal=17%
HALLMARK_WNT_BETA_CATENIN_SIGNALING	41	0.102327	0.778246	0.770624	0.799592	1	3189	tags=29%, list=19%, signal=36%		HALLMARK_UV_RESPONSE_UP	148	-0.0529021	-0.744636	0.787645	0.816879	1	13824	tags=88%, list=83%, signal=500%		HALLMARK_TNFA_SIGNALING_VIA_NFKB	196	0.0447671	0.72603	0.80625	0.834623	1	7285	tags=48%, list=44%, signal=84%		HALLMARK_COMPLEMENT	195	-0.0519595	-0.815509	0.690832	0.694428	1	10728	tags=69%, list=64%, signal=191%		HALLMARK_TGF_BETA_SIGNALING	54	0.0861807	0.750767	0.782868	0.782206	1	12508	tags=83%, list=75%, signal=329%
HALLMARK_UV_RESPONSE_UP	148	0.0445405	0.626229	0.931624	0.92436	1	7402	tags=49%, list=44%, signal=86%		HALLMARK_WNT_BETA_CATENIN_SIGNALING	41	0.0787383	0.589434	0.945525	0.949225	1	3991	tags=32%, list=24%, signal=42%		HALLMARK_APICAL_SURFACE	42	0.0765573	0.589821	0.965447	0.951671	1	14660	tags=95%, list=88%, signal=766%		HALLMARK_APOPTOSIS	158	0.0426347	0.623758	0.901186	0.926825	1	10732	tags=68%, list=64%, signal=189%		HALLMARK_PANCREAS_BETA_CELLS	22	-0.126677	-0.721921	0.832994	0.819989	1	5491	tags=45%, list=33%, signal=68%
